# Supplementary material for: Stimulation of VTA dopamine inputs to LH upregulates orexin neuronal activity in a DRD2-dependent manner
Source: eLife. 2024 Apr 3;12:RP90158. doi: 10.7554/eLife.90158 (PMC10990487; doi:10.7554/eLife.90158)
Supplement: Figure 1—source data 1. [file elife-90158-fig1-data1.xlsx]

## Sheet: panel_C_D
	0.0434889	0.0474844	0.0753382	0.00380513			-0.0368966	-0.00651883	0.0489413	0.0413095
	0.0409401	0.0615931	0.0851071	-0.0178142			-0.0666107	0.00628797	0.0266486	0.00417715
	0.0349572	0.0554254	0.081835	-0.030385			-0.10239	0.0116313	0.00101994	-0.00505069
	0.0258315	0.0261172	0.0554597	-0.0178674			-0.0960619	0.0157509	-0.00664973	0.00475101
	0.0130572	-0.00966988	0.0347374	-0.00137335			-0.0286827	0.0258286	-0.00655563	0.0200195
	0.00349123	-0.0296695	0.0374854	0.000879838			0.0546618	0.0363597	-0.0116996	0.0516513
	0.00752599	-0.0301837	0.043925	-0.0011904			0.0886161	0.0391868	-0.0139161	0.0871272
	0.0237086	-0.0232739	0.0450947	-0.00546253			0.0621799	0.0356405	-0.0132828	0.0982492
	0.0434071	-0.0185837	0.0501646	-0.0195675			0.0183779	0.034162	-0.0237155	0.0971404
	0.0561437	-0.0111514	0.0543751	-0.0258486			-0.00332075	0.0410572	-0.0396738	0.10305
	0.05594	0.0125844	0.0596092	-0.0133748			-0.00495345	0.0526786	-0.0533717	0.0915411
	0.0416544	0.0507343	0.080835	-0.00876562			-0.017176	0.0567576	-0.0702428	0.061467
	0.0172783	0.075864	0.106218	-0.0267757			-0.0557644	0.0458146	-0.07925	0.0547924
	-0.00215864	0.0628091	0.10667	-0.0444023			-0.0907757	0.029667	-0.0632467	0.0713019
	-0.00123996	0.01976	0.0840993	-0.0565796			-0.072765	0.0235671	-0.0353931	0.0742117
	0.013321	-0.0181801	0.0668199	-0.0701546			-0.0049251	0.0286829	-0.0209715	0.0619006
	0.0262725	-0.0205824	0.0637253	-0.0609937			0.045769	0.0307679	-0.0043001	0.0425933
	0.0375579	0.00395509	0.0667715	-0.0259457			0.0281755	0.0197703	0.00252198	0.00567003
	0.054969	0.0190504	0.0739264	-0.0052453			-0.0408453	0.0015494	-0.00477654	-0.0228055
	0.0801779	0.00906686	0.0798867	-0.0162505			-0.0987678	-0.0102944	-0.0141495	-0.00787688
	0.110764	-0.00413901	0.0754345	-0.0372642			-0.097325	-0.0095855	-0.0105457	0.0224355
	0.132998	0.00196717	0.0718815	-0.0643467			-0.0503507	-0.00252701	-0.00358378	0.0279617
	0.130588	0.0265446	0.0842083	-0.0975051			-0.0248675	-0.00530047	-0.00418903	0.0156577
	0.107732	0.052369	0.10039	-0.110548			-0.0471682	-0.0243942	-0.00910881	-0.00540154
	0.0864685	0.0582106	0.107731	-0.103412			-0.0681321	-0.0469522	-0.0219515	-0.0433351
	0.0797994	0.0394418	0.115365	-0.103523			-0.0395052	-0.0608576	-0.0465478	-0.0740487
	0.0809297	0.0177319	0.129829	-0.105185			0.0223654	-0.0633852	-0.0639776	-0.0648508
	0.0827113	0.0154399	0.140093	-0.0813133			0.0630828	-0.0567947	-0.0563216	-0.0291344
	0.085282	0.021413	0.14652	-0.0385125			0.0454441	-0.0462605	-0.0359569	0.00873304
	0.0857869	0.012227	0.156844	-0.00462899			-0.0179395	-0.0393656	-0.0232203	0.0507678
	0.0823897	-0.00653259	0.156663	0.0175544			-0.071742	-0.0409502	-0.0238996	0.0972388
	0.0798522	-0.0120416	0.135653	0.0300587			-0.0769751	-0.0493415	-0.0405982	0.134357
	0.0728811	0.000547799	0.110537	0.0288099			-0.0556064	-0.0596745	-0.0723024	0.169847
	0.0557875	0.0245438	0.0921897	0.0216023			-0.0589142	-0.064387	-0.0986214	0.205162
	0.0423765	0.0457897	0.0698381	0.0207106			-0.0953093	-0.0562483	-0.100596	0.202866
	0.0422411	0.0405258	0.042539	0.0140329			-0.116766	-0.0363191	-0.0870906	0.146347
	0.0445517	0.0113045	0.0244039	-0.00338774			-0.0827503	-0.00997873	-0.077312	0.0715833
	0.0501858	-0.00199995	0.0093835	-0.00548735			-0.0122622	0.0138787	-0.0757315	0.0140733
	0.0626928	0.0149897	-0.00574976	0.0226307			0.0307986	0.0247603	-0.0760946	-0.0167525
	0.0626476	0.0317728	-0.00416497	0.067847			0.00176112	0.016028	-0.0789113	-0.00474457
	0.0402762	0.0273307	0.00201944	0.115187			-0.0712395	-0.00635109	-0.0822206	0.0553797
	0.0177708	0.0093965	-0.00158033	0.156184			-0.109544	-0.0286672	-0.0820536	0.123098
	0.0115863	-0.00821668	-0.0131275	0.175497			-0.0785992	-0.0417465	-0.0893595	0.15085
	0.0163355	-0.00501199	-0.00647173	0.166243			-0.02975	-0.0477368	-0.108164	0.132893
	0.0234901	0.0284764	0.0075965	0.1449			-0.0279466	-0.0512416	-0.116793	0.0821221
	0.0223338	0.0658824	0.0129783	0.12255			-0.0756576	-0.0549995	-0.0976756	0.0131408
	0.0048381	0.0745678	0.0141178	0.0962445			-0.113497	-0.0598386	-0.0702	-0.041604
	-0.0136903	0.0596251	0.00231032	0.0681311			-0.0923877	-0.0611031	-0.0576039	-0.055698
	-0.00965969	0.0475899	-0.0296208	0.0453262			-0.0263448	-0.0551727	-0.0615406	-0.0428226
	0.00988839	0.0448435	-0.0546024	0.0234458			0.0218561	-0.0478043	-0.0787056	-0.0193248
	0.0146515	0.0378042	-0.0571894	-0.00148387			0.00725614	-0.0489478	-0.0956164	0.0251964
	0.00093042	0.0147713	-0.0612287	-0.0100959			-0.0481319	-0.0588836	-0.0891088	0.0852597
	-0.00996902	-0.0197623	-0.0729609	0.00498536			-0.0666799	-0.0691177	-0.0613303	0.128719
	-0.00879244	-0.0425629	-0.0721108	0.0225867			-0.00208098	-0.0748943	-0.0414419	0.15146
	-0.0012193	-0.0268099	-0.0570242	0.0294724			0.0933324	-0.0768169	-0.0332372	0.165648
	0.000729111	0.0200056	-0.0352912	0.0293517			0.127125	-0.0758951	-0.0193332	0.15315
	-0.0188676	0.0582019	-0.00270181	0.0188424			0.0731203	-0.0725307	-0.00313008	0.1201
	-0.0531191	0.0615675	0.0264937	0.00549819			-0.0153404	-0.0645627	0.00275313	0.114643
	-0.063912	0.0381507	0.0178784	0.00800653			-0.0671751	-0.0493912	0.00239866	0.146439
	-0.0365837	0.0126717	-0.0197661	0.016612			-0.0598752	-0.0296212	-0.000604032	0.177828
	-2.67921e-05	0.0028426	-0.0490335	0.00836799			-0.0424029	-0.015729	-0.0133774	0.198439
	0.0147102	0.000807944	-0.0674521	-0.00161609			-0.0713122	-0.0168445	-0.0269476	0.221451
	0.000378167	-0.0157035	-0.0878995	0.00830379			-0.127086	-0.0289108	-0.0341861	0.231835
	-0.0265533	-0.043472	-0.106534	0.0262467			-0.138121	-0.0390079	-0.048936	0.231196
	-0.0370375	-0.0516298	-0.123526	0.0382873			-0.0745503	-0.0411957	-0.0722727	0.246099
	-0.0188698	-0.0237585	-0.140114	0.0472572			0.0117077	-0.0388172	-0.0840454	0.26328
	0.00872444	0.0272268	-0.137032	0.043322			0.0416756	-0.0426842	-0.0768955	0.25789
	0.0197385	0.0702487	-0.105653	0.0237514			-0.00661873	-0.0560756	-0.0570575	0.256943
	0.0119327	0.0784482	-0.0781958	0.0216875			-0.0703353	-0.0693628	-0.021858	0.286575
	0.00134502	0.0562938	-0.0794118	0.050924			-0.0691384	-0.0695398	0.0181685	0.31702
	-0.00381936	0.035057	-0.0911259	0.0792666			-0.00456186	-0.0518896	0.0377028	0.334103
	-0.0119782	0.034331	-0.0925915	0.0903327			0.0489329	-0.0259229	0.0397828	0.352518
	-0.023556	0.0440494	-0.0818805	0.103091			0.039832	-0.0114875	0.0455427	0.350315
	-0.022761	0.0418801	-0.0561983	0.110892			-0.000765998	-0.0184009	0.0522258	0.310014
	0.000761162	0.0187284	-0.0200706	0.0952756			-0.013698	-0.0351184	0.0512247	0.271585
	0.0442005	-0.00901666	0.0020873	0.0755685			0.0202464	-0.0465149	0.0498888	0.260698
	0.0907548	-0.0196124	-0.0013983	0.0594856			0.0648457	-0.0511512	0.0482218	0.252515
	0.112043	-0.0144325	-0.00978189	0.0291825			0.0637866	-0.0510789	0.0384437	0.238618
	0.0939302	-0.0136775	-0.0117143	-0.0021993			0.00163617	-0.0467657	0.0295518	0.222811
	0.0560781	-0.0279589	-0.0208516	-0.00989342			-0.0650831	-0.0428174	0.0289839	0.181533
	0.0221376	-0.0489037	-0.0358424	-0.00885402			-0.0725454	-0.0412528	0.0209376	0.117302
	-0.000859617	-0.0559779	-0.0435606	-0.0184072			-0.0267311	-0.0410301	0.000952854	0.0754472
	-0.011682	-0.0379245	-0.0466072	-0.0189539			0.0211958	-0.0474178	-0.00920673	0.0699147
	-0.0126662	-0.0145408	-0.0420259	-0.00654161			0.0380188	-0.0620623	-0.00300259	0.0689587
	-0.0130283	-0.0161929	-0.0221391	-0.00133197			0.0277644	-0.0732303	0.00654798	0.0610258
	-0.0154674	-0.0379026	0.000363996	-0.0043511			0.0236128	-0.0660649	0.0169137	0.0473837
	-0.0137183	-0.044089	0.00306541	-0.00664519			0.0495956	-0.0407907	0.0317577	0.00653695
	-0.00983046	-0.0205499	-0.00711243	-0.022068			0.080853	-0.0129691	0.0503984	-0.0605361
	-0.0188596	0.00773984	-0.00622854	-0.0577576			0.0686182	0.00389246	0.0819158	-0.118292
	-0.0426245	0.0142664	0.00131711	-0.0900114			0.0125885	0.00234125	0.13333	-0.149494
	-0.0649097	-0.00760249	0.000350879	-0.105926			-0.0294697	-0.0135294	0.182176	-0.161009
	-0.077229	-0.0433061	-0.00993118	-0.113382			-0.00624306	-0.0274771	0.19773	-0.142595
	-0.0792687	-0.0574246	-0.0339807	-0.107274			0.0688733	-0.0249808	0.184365	-0.0895582
	-0.0639186	-0.029794	-0.0739295	-0.0761807			0.126893	-0.0113248	0.169207	-0.0332295
	-0.0400399	0.00426095	-0.104254	-0.0352655			0.117527	-0.00110772	0.161176	0.00655988
	-0.0313706	0.00282448	-0.104996	-0.00511011			0.0620359	0.00230299	0.152941	0.042804
	-0.0329383	-0.0222783	-0.0997511	0.0142159			0.033203	0.00694629	0.135608	0.0766553
	-0.0238101	-0.0387467	-0.10789	0.0168796			0.0714688	0.0170298	0.106178	0.0944123
	-0.00962227	-0.0384621	-0.111226	-0.00505125			0.133075	0.0248087	0.0688492	0.101196
	-0.00327318	-0.0242088	-0.105758	-0.03798			0.137587	0.0196854	0.0439898	0.107268
	-0.00463103	-0.0106238	-0.104183	-0.0623578			0.0710449	0.00617375	0.0481995	0.0959071
	-0.0130716	-0.0262158	-0.096373	-0.0777481			0.00356511	0.000593523	0.061896	0.0575735
	-0.0206557	-0.0648823	-0.0791368	-0.0881905			0.00471363	0.00940552	0.0605646	0.0126808
	-0.00702805	-0.0810744	-0.0681242	-0.0803697			0.0680319	0.0288696	0.0477573	-0.0270747
	0.0256332	-0.0545317	-0.0517109	-0.0531732			0.123432	0.0531602	0.0376986	-0.0678339
	0.0474157	-0.0154744	-0.00862111	-0.0251272			0.1154	0.0701596	0.0346178	-0.0955646
	0.0449442	0.00102958	0.0362374	-0.00880732			0.058753	0.0713875	0.0465376	-0.088868
	0.0337932	-0.0116202	0.0456949	-0.00491969			0.0186268	0.0605715	0.0749276	-0.0605562
	0.0302223	-0.0342908	0.0253193	-0.021112			0.0368352	0.0466782	0.0954658	-0.0248401
	0.0326954	-0.0411175	0.000452988	-0.0575604			0.0816342	0.0387848	0.0936815	0.0237405
	0.0320155	-0.027311	-0.0139776	-0.0927983			0.0852397	0.0440299	0.0869793	0.0670335
	0.0142905	-0.0165357	0.00128758	-0.115382			0.0296093	0.0596002	0.087872	0.0751087
	-0.0278763	-0.0234493	0.0431981	-0.132906			-0.0324053	0.0715603	0.0831464	0.0682967
	-0.0709857	-0.0260794	0.0637279	-0.136852			-0.0471137	0.0745913	0.0662995	0.0816148
	-0.0793001	-0.000128901	0.0374084	-0.120196			-0.0144447	0.0734762	0.0416556	0.100858
	-0.0509422	0.0422889	3.80281e-06	-0.101545			0.0187966	0.0680047	0.0115269	0.109623
	-0.0148312	0.0677537	-0.0154071	-0.0883191			0.0109337	0.0553237	-0.0122124	0.116964
	0.00516606	0.0529098	-0.0172793	-0.0692836			-0.0231333	0.0419422	-0.0181321	0.103233
	0.00103194	0.00703266	-0.0187021	-0.0580096			-0.0272956	0.0333199	-0.0225417	0.0441668
	-0.0201019	-0.0296815	-0.0241431	-0.072727			0.0161878	0.026801	-0.0474257	-0.0350715
	-0.0358231	-0.0284414	-0.0459686	-0.089601			0.0560275	0.0202383	-0.0734771	-0.105247
	-0.0367652	-0.0100018	-0.0723106	-0.0821491			0.0367723	0.0207311	-0.0723845	-0.176619
	-0.0351626	-0.0109522	-0.0739947	-0.0574229			-0.0405042	0.0349959	-0.0531205	-0.242642
	-0.0436613	-0.0339001	-0.0599403	-0.0209737			-0.115491	0.0610996	-0.0317226	-0.274234
	-0.0581627	-0.0571553	-0.0569601	0.0267258			-0.123457	0.0883478	-0.011217	-0.281607
	-0.0666163	-0.0608732	-0.0582573	0.0546292			-0.0575604	0.0986309	0.000773126	-0.286882
	-0.0624313	-0.0400955	-0.0414234	0.0407633			0.0161762	0.0836995	0.000352119	-0.276865
	-0.0490533	-0.0115949	-0.00827003	0.0154017			0.0316988	0.0568199	-0.00255043	-0.254577
	-0.0367551	0.00243111	0.0272711	0.0026303			-0.0048873	0.034629	-0.00900848	-0.2569
	-0.0368699	-0.00051725	0.0571749	-0.00784568			-0.0312865	0.0241836	-0.0294673	-0.279019
	-0.0549082	-0.00369433	0.0652043	-0.00795968			-0.00378348	0.0226603	-0.0511092	-0.28386
	-0.0754079	0.003094	0.0442046	0.0192586			0.0595779	0.0221189	-0.0563639	-0.278275
	-0.0804133	0.0112097	0.0213796	0.050794			0.0986459	0.0206448	-0.051761	-0.281254
	-0.075148	0.00576346	0.0213934	0.0601014			0.0709711	0.0307467	-0.0441781	-0.280879
	-0.0716581	-0.0127219	0.0314799	0.064027			0.00604268	0.0613582	-0.0273388	-0.277742
	-0.0713509	-0.0264342	0.0355266	0.0600563			-0.0223356	0.0992324	-0.00861467	-0.28562
	-0.0749847	-0.0175128	0.038844	0.0275814			0.00856168	0.122086	-0.00194103	-0.280374
	-0.0813741	0.0114121	0.0395698	-0.0106913			0.048891	0.119143	-0.00147225	-0.245184
	-0.0842612	0.0341858	0.0287987	-0.0212207			0.0497875	0.0926194	0.00447886	-0.226632
	-0.089134	0.0266922	0.0186505	-0.0137571			0.0182985	0.0579863	0.0111761	-0.260922
	-0.108641	-0.00494831	0.0194926	-0.00340981			0.000708668	0.037957	0.0158765	-0.329015
	-0.131403	-0.031934	0.0104899	0.0173738			0.0360645	0.0349863	0.0259798	-0.406376
	-0.134462	-0.0430149	-0.0137717	0.039792			0.10431	0.0341924	0.0410057	-0.478582
	-0.113147	-0.0491408	-0.0297762	0.0483619			0.12901	0.0271687	0.0483196	-0.516993
	-0.0810966	-0.0583786	-0.0276676	0.0596075			0.0722346	0.0207147	0.0562329	-0.508769
	-0.0525421	-0.0651117	-0.0200823	0.0904544			-0.0111656	0.0201558	0.0688344	-0.480803
	-0.0359501	-0.0605556	-0.0145995	0.125328			-0.0362715	0.0220197	0.0694093	-0.451735
	-0.0270349	-0.0397798	-0.0139614	0.149416			0.014708	0.0223399	0.0535327	-0.41741
	-0.00403465	-0.00716819	-0.0291832	0.171448			0.0827497	0.0189506	0.0411622	-0.388236
	0.0414453	0.0175245	-0.0518613	0.188821			0.0960608	0.0152864	0.0447423	-0.380391
	0.0752435	0.0131568	-0.0561931	0.187675			0.0466971	0.0215856	0.0572984	-0.382504
	0.0628087	-0.0119518	-0.0472554	0.172281			-0.00211908	0.0391538	0.0758168	-0.378216
	0.0155996	-0.0278917	-0.0471385	0.155006			0.0107186	0.0562097	0.0982911	-0.377714
	-0.0343284	-0.0283936	-0.0442246	0.134587			0.067645	0.0636197	0.113839	-0.381929
	-0.0635971	-0.0277687	-0.0202376	0.113502			0.0912313	0.064616	0.126179	-0.369123
	-0.0574386	-0.0312904	0.00949909	0.109604			0.0424126	0.0660312	0.149525	-0.341348
	-0.0299222	-0.0361225	0.0274141	0.117215			-0.028659	0.0689361	0.176085	-0.327924
	-0.0192657	-0.0382886	0.0332382	0.122554			-0.0428468	0.0647174	0.181997	-0.338506
	-0.0266717	-0.0244916	0.0152048	0.127926			0.0175349	0.0444299	0.166418	-0.360683
	-0.0196162	0.00612255	-0.0244325	0.137527			0.0888851	0.012852	0.148061	-0.388266
	0.00927989	0.022355	-0.0464215	0.140542			0.0935335	-0.0114961	0.130425	-0.406228
	0.0414412	0.00454696	-0.037933	0.126157			0.0254089	-0.0163662	0.113997	-0.393266
	0.0601488	-0.0259867	-0.0321733	0.0993452			-0.0420297	-0.0044212	0.108652	-0.36132
	0.0516564	-0.0431582	-0.0380605	0.0660181			-0.0377417	0.0141899	0.112077	-0.340437
	0.020197	-0.0434838	-0.0359124	0.0304744			0.0283613	0.0212154	0.111105	-0.323667
	0.00226849	-0.0351967	-0.0261177	0.00893768			0.0774076	0.00806887	0.109212	-0.296319
	0.0255787	-0.0300916	-0.0164106	0.0126941			0.0562027	-0.0116015	0.109939	-0.281826
	0.0718193	-0.0364468	0.000839322	0.0334592			0.00145078	-0.0220864	0.096158	-0.294159
	0.101491	-0.0451852	0.0177149	0.0617107			-0.00906235	-0.0245929	0.0666348	-0.306283
	0.0955437	-0.0391418	0.0103942	0.0979013			0.0473198	-0.0261464	0.0469724	-0.309757
	0.0625391	-0.0207189	-0.0105512	0.1227			0.115717	-0.0266305	0.0498632	-0.32386
	0.0198296	-0.0106406	-0.0224272	0.109826			0.123126	-0.0194901	0.0643608	-0.34734
	-0.0128901	-0.0175941	-0.0357144	0.0700514			0.0538456	0.00399216	0.0829627	-0.374558
	-0.0312556	-0.0314032	-0.055596	0.0272281			-0.0195152	0.0441846	0.097373	-0.422045
	-0.0473492	-0.0401025	-0.0646188	-0.014405			-0.0124852	0.0787534	0.0964279	-0.477887
	-0.0607835	-0.0458238	-0.0648926	-0.0393473			0.0690355	0.0800295	0.0925714	-0.50253
	-0.0480953	-0.0288704	-0.0683636	-0.0257742			0.135444	0.0489798	0.105596	-0.503212
	-0.00406874	-0.0165174	-0.0614271	0.00875468			0.118043	0.0157511	0.130033	-0.512044
	0.0398684	-0.01611	-0.0399683	0.0386088			0.0335112	0.00583446	0.149432	-0.528129
	0.0496944	-0.0210448	-0.0371154	0.0718438			-0.0366404	0.0164882	0.163084	-0.553895
	0.0145391	-0.0275789	-0.0621472	0.108788			-0.0281476	0.0253469	0.171301	-0.60778
	-0.0432103	-0.0384995	-0.0813885	0.124868			0.0328264	0.0165281	0.167737	-0.663511
	-0.0808118	-0.0486811	-0.0799756	0.119196			0.0624446	-0.00511472	0.163474	-0.676952
	-0.0746828	-0.0517543	-0.0699346	0.107243			0.0276485	-0.0172425	0.166896	-0.662122
	-0.0483816	-0.0453522	-0.0620687	0.0834618			-0.0209388	-0.00721336	0.162286	-0.645221
	-0.0457917	-0.0308543	-0.0674108	0.0494241			-0.019153	0.0108868	0.14299	-0.617885
	-0.0795245	-0.0190052	-0.0922359	0.0364144			0.0368046	0.0146198	0.128798	-0.589022
	-0.113744	-0.0222083	-0.116135	0.0418521			0.0926362	-0.00251133	0.128627	-0.588896
	-0.108992	-0.0359472	-0.113297	0.0354817			0.0935737	-0.0243376	0.132816	-0.606137
	-0.0689863	-0.0420612	-0.0974238	0.0281766			0.0481079	-0.0286235	0.138087	-0.616414
	-0.0300857	-0.0322246	-0.0999219	0.0445579			0.0181836	-0.0142126	0.141173	-0.637496
	-0.0201621	-0.0152154	-0.116014	0.0648033			0.0368841	-0.00391371	0.131415	-0.674522
	-0.0358792	-0.00241937	-0.119773	0.0686685			0.0630087	-0.0138293	0.116029	-0.69762
	-0.0423985	0.00335865	-0.111622	0.0741369			0.0429137	-0.0344231	0.113223	-0.70456
	-0.0163377	-2.07729e-05	-0.102721	0.0812575			-0.0188217	-0.0432814	0.119062	-0.720627
	0.0168997	-0.0103454	-0.0981086	0.0750564			-0.0730343	-0.0305937	0.121863	-0.735359
	0.0194558	-0.0159433	-0.10727	0.0764489			-0.0682216	-0.00852468	0.126857	-0.735639
	-0.00757052	-0.0145977	-0.130025	0.0977945			-0.00127821	-0.000683253	0.137876	-0.744027
	-0.0375594	-0.0165287	-0.142949	0.114139			0.0607998	-0.0150563	0.145437	-0.761987
	-0.050653	-0.0211922	-0.136837	0.114078			0.0421645	-0.0342037	0.148586	-0.768075
	-0.0409165	-0.0176618	-0.13829	0.113809			-0.0383365	-0.0423213	0.154188	-0.767961
	-0.0283367	-0.0088883	-0.156874	0.109663			-0.084854	-0.0456852	0.153025	-0.771283
	-0.0424335	-0.00344099	-0.172618	0.0923604			-0.0393401	-0.0599318	0.133436	-0.755255
	-0.0766479	0.00387368	-0.180061	0.0821489			0.0585441	-0.0894435	0.113546	-0.708847
	-0.089665	0.0159975	-0.184328	0.0913557			0.120617	-0.118524	0.119563	-0.66217
	-0.063694	0.0228539	-0.179619	0.0995847			0.0996823	-0.128318	0.149012	-0.634019
	-0.028992	0.0179722	-0.166881	0.091486			0.0388093	-0.111299	0.187901	-0.618126
	-0.0203836	0.0027327	-0.163303	0.0826804			0.0214894	-0.0791805	0.231445	-0.615655
	-0.0434292	-0.0208475	-0.165044	0.0832186			0.0695987	-0.0555	0.271731	-0.628163
	-0.081123	-0.048192	-0.146656	0.0953345			0.114254	-0.0525863	0.295742	-0.641726
	-0.102638	-0.0643555	-0.11249	0.124012			0.0834979	-0.0581606	0.302279	-0.65639
	-0.0916941	-0.0590758	-0.0859219	0.157543			-0.00363406	-0.0555758	0.297288	-0.692527
	-0.0753321	-0.0440407	-0.0678267	0.166583			-0.0561705	-0.0487884	0.27813	-0.740235
	-0.0833893	-0.0300052	-0.0607638	0.14868			-0.0202511	-0.0555092	0.255463	-0.761751
	-0.0940197	-0.0136016	-0.0781402	0.133563			0.0593511	-0.0848	0.248991	-0.748835
	-0.0788478	0.0020438	-0.101857	0.12887			0.0933576	-0.12484	0.255761	-0.722432
	-0.0534082	0.00988045	-0.103264	0.116243			0.0469611	-0.153397	0.258042	-0.685458
	-0.0423139	0.0161576	-0.0950078	0.0900269			-0.0259754	-0.154205	0.256441	-0.635903
	-0.0580158	0.0236698	-0.098551	0.056286			-0.0500181	-0.133417	0.262538	-0.593574
	-0.101339	0.0207369	-0.100702	0.0261121			-0.0150693	-0.112805	0.270664	-0.572688
	-0.13757	0.00674938	-0.0918479	0.0132556			0.0175609	-0.104798	0.276168	-0.569639
	-0.120573	-0.0035575	-0.0794893	0.0239228			-0.00550232	-0.101894	0.284896	-0.592407
	-0.0590581	-0.00679204	-0.052704	0.0401237			-0.0612566	-0.091916	0.285584	-0.640879
	-0.00823913	-0.0100066	-0.00856718	0.0421555			-0.0717615	-0.0777385	0.261684	-0.676946
	-0.00144029	-0.0168779	0.0231041	0.035319			-0.000628542	-0.0723728	0.226316	-0.675366
	-0.0301919	-0.024417	0.0323479	0.025783			0.0968952	-0.0831555	0.20413	-0.666159
	-0.0587701	-0.0232358	0.0430753	0.000110536			0.127858	-0.107483	0.185747	-0.671356
	-0.0561544	-0.00438564	0.0619896	-0.0498336			0.0591096	-0.129519	0.168857	-0.677597
	-0.0276222	0.022732	0.0727619	-0.119561			-0.0432599	-0.132575	0.161704	-0.689186
	-0.0114008	0.0357868	0.0741703	-0.210282			-0.0796047	-0.117407	0.161743	-0.712689
	-0.0335424	0.0199833	0.0666884	-0.305096			-0.0322268	-0.0991013	0.161107	-0.722885
	-0.0669219	-0.0140462	0.0359726	-0.356184			0.0173362	-0.0889456	0.162838	-0.713382
	-0.0622872	-0.0371108	-0.0045647	-0.346953			-0.00180225	-0.0849041	0.160377	-0.71857
	-0.0168522	-0.0331592	-0.0237011	-0.317606			-0.0655027	-0.0785964	0.137969	-0.742342
	0.0185042	-0.0118711	-0.0321589	-0.296215			-0.0925938	-0.0710901	0.109609	-0.758242
	0.00154254	0.0024639	-0.0554208	-0.282253			-0.0378925	-0.0717033	0.0978473	-0.778321
	-0.0562869	-0.00196692	-0.0817499	-0.280239			0.0559138	-0.0827447	0.0979513	-0.809499
	-0.0986932	-0.0152288	-0.0914464	-0.283564			0.101424	-0.0934975	0.0975068	-0.821504
	-0.0769237	-0.0231429	-0.0961438	-0.267033			0.0642784	-0.0946373	0.0993412	-0.813887
	-0.00872314	-0.0263783	-0.110908	-0.242015			0.00646988	-0.0871522	0.105455	-0.815316
	0.0380955	-0.0341549	-0.133838	-0.24033			0.00497346	-0.077963	0.113858	-0.814145
	0.0309244	-0.0476939	-0.16303	-0.257535			0.0634734	-0.0779635	0.135092	-0.788072
	0.00407578	-0.0586824	-0.183934	-0.276493			0.116491	-0.0892144	0.16968	-0.765007
	0.00773363	-0.0563494	-0.171533	-0.305873			0.10153	-0.098653	0.194738	-0.765834
	0.0409617	-0.0381462	-0.133031	-0.342675			0.0233406	-0.0961142	0.202002	-0.779456
	0.0534495	-0.018265	-0.107554	-0.357414			-0.047315	-0.0868785	0.20451	-0.816198
	0.00693366	-0.0152519	-0.110356	-0.352527			-0.0489533	-0.0822403	0.201887	-0.887864
	-0.0775071	-0.0307139	-0.121056	-0.351674			-0.00646362	-0.0883809	0.188078	-0.955069
	-0.137703	-0.0482304	-0.127098	-0.341002			0.00762721	-0.101518	0.175876	-0.986906
	-0.1293	-0.0533565	-0.135967	-0.308533			-0.032478	-0.112407	0.176045	-1.00936
	-0.0785494	-0.0467846	-0.146354	-0.282306			-0.0775278	-0.114235	0.182687	-1.03572
	-0.0592193	-0.0398854	-0.157466	-0.283368			-0.0697807	-0.111687	0.193484	-1.04571
	-0.0979599	-0.0365695	-0.181127	-0.299873			-0.00405643	-0.118452	0.210457	-1.04173
	-0.145859	-0.033386	-0.207955	-0.33346			0.0623444	-0.137502	0.21479	-1.03353
	-0.147755	-0.0244772	-0.213143	-0.387101			0.0622422	-0.151569	0.197178	-1.00302
	-0.101746	-0.00260538	-0.199675	-0.430227			-0.00313975	-0.14544	0.175331	-0.949517
	-0.0560354	0.0231056	-0.181209	-0.451558			-0.0593604	-0.122531	0.161171	-0.907489
	-0.0625694	0.026946	-0.153272	-0.472844			-0.0502449	-0.102585	0.148251	-0.881205
	-0.111786	0.00391773	-0.117404	-0.492635			0.0019956	-0.0991578	0.137627	-0.850145
	-0.134386	-0.0205961	-0.0949144	-0.483492			0.04044	-0.110772	0.136188	-0.821822
	-0.0939396	-0.0345745	-0.0887825	-0.448927			0.0367897	-0.123228	0.133018	-0.805925
	-0.0352476	-0.0446875	-0.0850214	-0.411881			0.0113544	-0.128701	0.117832	-0.780787
	-0.0182445	-0.0517358	-0.0930538	-0.378778			0.0111087	-0.135486	0.102856	-0.735436
	-0.0498499	-0.0534025	-0.119124	-0.35577			0.0498443	-0.149557	0.100127	-0.694855
	-0.0892028	-0.0546124	-0.138865	-0.359074			0.0850736	-0.166795	0.0999344	-0.673301
	-0.0934005	-0.0485227	-0.135422	-0.386219			0.0713865	-0.176859	0.0966651	-0.667541
	-0.0581873	-0.0263645	-0.122962	-0.415641			0.0225163	-0.169411	0.093737	-0.68337
	-0.0278041	-0.00632963	-0.112436	-0.443016			-0.00481324	-0.146716	0.0866271	-0.713268
	-0.0511212	-0.0129836	-0.102358	-0.473472			0.0158051	-0.126054	0.0728251	-0.72539
	-0.110708	-0.0377862	-0.102635	-0.493805			0.046133	-0.11635	0.061677	-0.712454
	-0.138238	-0.0557463	-0.109222	-0.493986			0.0340826	-0.11264	0.0556958	-0.709753
	-0.105863	-0.0588453	-0.0907922	-0.477642			-0.0193361	-0.110263	0.0419496	-0.737999
	-0.0511828	-0.0481454	-0.0527811	-0.448884			-0.0615648	-0.109326	0.0270971	-0.77963
	-0.0225711	-0.0292603	-0.038139	-0.410402			-0.0444178	-0.110898	0.033199	-0.817307
	-0.0368761	-0.0253722	-0.0545286	-0.38202			0.0185467	-0.11772	0.0568387	-0.829364
	-0.0640117	-0.0430908	-0.0789419	-0.377398			0.058651	-0.130009	0.0743602	-0.785471
	-0.0481651	-0.0551361	-0.102621	-0.382461			0.0263315	-0.137048	0.0750911	-0.688183
	0.0112784	-0.0478361	-0.113542	-0.385759			-0.0472914	-0.128456	0.0640353	-0.57943
	0.0465456	-0.0440071	-0.0972686	-0.390798			-0.0879283	-0.112459	0.0494829	-0.481559
	0.0171776	-0.0580683	-0.0746787	-0.395739			-0.0659249	-0.103107	0.0495934	-0.391629
	-0.038161	-0.0793168	-0.0732681	-0.392937			-0.0212794	-0.103056	0.0731285	-0.328594
	-0.0595261	-0.0912381	-0.0753041	-0.389046			-0.0115333	-0.106702	0.0976331	-0.311373
	-0.0305865	-0.0827193	-0.0586553	-0.394234			-0.0503429	-0.114134	0.100087	-0.319357
	0.0117236	-0.0596883	-0.0390795	-0.400428			-0.098169	-0.127195	0.0917308	-0.334963
	0.0138842	-0.0489683	-0.0294738	-0.3988			-0.104657	-0.143689	0.0908415	-0.365626
	-0.0324685	-0.0662271	-0.0245553	-0.394275			-0.0632316	-0.162371	0.0944511	-0.399309
	-0.0747142	-0.0933967	-0.0310576	-0.380185			-0.0225345	-0.176046	0.10306	-0.414788
	-0.056901	-0.109447	-0.0525947	-0.349681			-0.0246127	-0.170414	0.119669	-0.430948
	0.0107054	-0.111113	-0.0684011	-0.325916			-0.0556602	-0.14595	0.134265	-0.460251
	0.0587494	-0.109004	-0.0705084	-0.328999			-0.0731862	-0.118331	0.139714	-0.471709
	0.0418235	-0.116433	-0.0823009	-0.339318			-0.0642002	-0.099656	0.145087	-0.455351
	-0.0168217	-0.134305	-0.103096	-0.340444			-0.0497559	-0.0934829	0.148823	-0.436848
	-0.067044	-0.14404	-0.103632	-0.335572			-0.0627835	-0.0970821	0.135039	-0.411109
	-0.0818949	-0.127825	-0.0847637	-0.317072			-0.105825	-0.106524	0.111054	-0.36029
	-0.0748074	-0.0949056	-0.0629794	-0.289915			-0.132066	-0.122838	0.0962593	-0.309552
	-0.0785351	-0.0716134	-0.0385324	-0.291401			-0.104875	-0.143343	0.0932546	-0.268459
	-0.0978041	-0.0726963	-0.0164995	-0.324787			-0.0524824	-0.154354	0.0973007	-0.20751
	-0.0964411	-0.0966161	-0.00783939	-0.34637			-0.0302332	-0.151678	0.102967	-0.131366
	-0.0576023	-0.127253	-0.00148874	-0.339915			-0.0519988	-0.148383	0.0973774	-0.0774085
	-0.0149226	-0.143999	0.0155264	-0.324039			-0.087339	-0.149259	0.0796312	-0.0480211
	-0.014657	-0.144066	0.025239	-0.301332			-0.0902976	-0.147867	0.0779642	-0.0406913
	-0.0649776	-0.147303	0.01002	-0.278646			-0.0484101	-0.143681	0.106603	-0.0868513
	-0.120951	-0.163413	-0.0120515	-0.275371			-0.00275433	-0.135781	0.139422	-0.18423
	-0.122885	-0.178139	-0.019008	-0.282048			-0.00163174	-0.122685	0.151343	-0.289434
	-0.0566011	-0.173527	-0.0120132	-0.268187			-0.0402404	-0.110866	0.144936	-0.386876
	0.0281036	-0.147959	0.00331937	-0.241492			-0.0730913	-0.109256	0.125784	-0.468612
	0.065208	-0.115481	0.0205963	-0.226414			-0.0726453	-0.116411	0.101366	-0.498349
	0.0376568	-0.0982331	0.0227506	-0.207933			-0.0512141	-0.126578	0.0844446	-0.470426
	-0.00346137	-0.108809	0.00597675	-0.178612			-0.0377542	-0.136442	0.0690718	-0.432641
	-0.00628063	-0.136213	-0.00453085	-0.162067			-0.053461	-0.145849	0.0427991	-0.407057
	0.0157015	-0.158664	0.00682114	-0.161846			-0.0924095	-0.154384	0.0209379	-0.388013
	0.0161344	-0.163269	0.0187655	-0.157174			-0.125426	-0.167409	0.0353974	-0.393106
	-0.0227793	-0.15917	0.0170426	-0.155821			-0.130606	-0.186299	0.0697459	-0.428092
	-0.0766225	-0.163012	0.00885566	-0.171124			-0.124531	-0.19816	0.0967061	-0.457593
	-0.0932599	-0.17058	-0.00844685	-0.187995			-0.132859	-0.193045	0.107818	-0.462814
	-0.0510116	-0.16601	-0.030489	-0.210296			-0.150991	-0.173864	0.101937	-0.460788
	-0.00129065	-0.149965	-0.0356985	-0.263048			-0.156754	-0.148986	0.0802555	-0.453197
	-0.00202943	-0.135264	-0.0230788	-0.333665			-0.139703	-0.127288	0.0604458	-0.433507
	-0.0380589	-0.132702	-0.0185859	-0.381823			-0.107966	-0.11982	0.0533555	-0.420299
	-0.0569941	-0.148184	-0.0285311	-0.395633			-0.0804535	-0.125847	0.0431072	-0.42546
	-0.0389729	-0.173613	-0.0346768	-0.388478			-0.0711992	-0.130719	0.0219845	-0.434058
	-0.00441677	-0.183976	-0.0375583	-0.370967			-0.0666077	-0.126538	0.0127674	-0.441087
	0.00894905	-0.174098	-0.0433902	-0.360238			-0.0477675	-0.115338	0.0333811	-0.45619
	-0.017258	-0.169628	-0.0389442	-0.368025			-0.0233209	-0.101965	0.0702199	-0.464751
	-0.0509492	-0.180684	-0.0240985	-0.383513			-0.0192152	-0.0952833	0.102856	-0.445819
	-0.0457237	-0.185218	-0.0134847	-0.388432			-0.0432201	-0.100171	0.119555	-0.416485
	-0.00867668	-0.172412	-0.00296729	-0.390263			-0.0725618	-0.114035	0.112242	-0.406232
	0.0100403	-0.153365	0.0116242	-0.403126			-0.074852	-0.134618	0.0941914	-0.422364
	-0.0079469	-0.139798	0.00464962	-0.418157			-0.0491565	-0.156271	0.0929967	-0.463737
	-0.0307165	-0.13846	-0.0311229	-0.428238			-0.027078	-0.167138	0.112217	-0.528877
	-0.0259637	-0.15276	-0.0596003	-0.438067			-0.030086	-0.164522	0.125305	-0.590813
	0.00910595	-0.164765	-0.066592	-0.446955			-0.0464268	-0.155609	0.123168	-0.618845
	0.0480398	-0.154622	-0.0710549	-0.450929			-0.0475377	-0.145382	0.124218	-0.625653
	0.0433661	-0.139493	-0.0737077	-0.461381			-0.019761	-0.134157	0.137857	-0.63583
	-0.0191495	-0.149045	-0.075276	-0.485237			0.0131348	-0.125149	0.162805	-0.642312
	-0.081101	-0.178257	-0.0923987	-0.506065			0.017015	-0.116398	0.191668	-0.637729
	-0.0828066	-0.203843	-0.111304	-0.510953			-0.00766242	-0.101143	0.214739	-0.633437
	-0.0360584	-0.212415	-0.101191	-0.502984			-0.0245201	-0.084535	0.208707	-0.625101
	0.00765371	-0.195806	-0.076282	-0.483472			-0.00637956	-0.0782703	0.190094	-0.602164
	0.0102503	-0.161723	-0.0724896	-0.459427			0.0356726	-0.0820675	0.18113	-0.587436
	-0.0300125	-0.137904	-0.0909316	-0.449375			0.0642315	-0.0867132	0.175598	-0.593085
	-0.0689446	-0.139711	-0.117624	-0.458078			0.0529075	-0.0883341	0.159143	-0.587789
	-0.0565714	-0.153694	-0.149681	-0.461922			0.00943845	-0.0851689	0.138526	-0.557782
	-0.000613546	-0.164866	-0.169293	-0.45043			-0.0287614	-0.0774026	0.128378	-0.52419
	0.0431641	-0.17052	-0.162757	-0.440239			-0.0354239	-0.0746007	0.133321	-0.48654
	0.0388757	-0.172225	-0.155309	-0.435126			-0.0259769	-0.0822999	0.154272	-0.439886
	0.000946424	-0.176278	-0.160784	-0.42481			-0.0268999	-0.0906436	0.178615	-0.423903
	-0.0278797	-0.185752	-0.152272	-0.41613			-0.0364628	-0.0947288	0.179733	-0.456213
	-0.0292321	-0.188017	-0.11874	-0.408718			-0.035701	-0.100627	0.15475	-0.496578
	-0.0263881	-0.175337	-0.0917855	-0.38743			-0.0155267	-0.10869	0.128765	-0.519553
	-0.0517092	-0.157126	-0.0918923	-0.366471			0.0198511	-0.11658	0.117771	-0.524342
	-0.101994	-0.146218	-0.112311	-0.373046			0.0516018	-0.124876	0.114718	-0.484729
	-0.133266	-0.142938	-0.148624	-0.392927			0.0642287	-0.132112	0.0718403	-0.397335
	-0.110335	-0.143757	-0.1802	-0.40925			0.0689093	-0.138335	0.0834485	-0.316149
	-0.0581973	-0.145486	-0.174518	-0.432624			0.0818661	-0.145927	0.0954987	-0.261034
	-0.0323243	-0.146387	-0.140176	-0.452807			0.0925667	-0.153212	0.101459	-0.203006
	-0.0451431	-0.152368	-0.112055	-0.44265			0.083652	-0.153871	0.113315	-0.144514
	-0.0598454	-0.170038	-0.0978483	-0.420113			0.0560349	-0.146239	0.127399	-0.102924
	-0.0446862	-0.186619	-0.0879719	-0.417918			0.0229151	-0.13288	0.128398	-0.0675995
	-0.0109334	-0.1833	-0.0888617	-0.423915			0.00154561	-0.122995	0.116983	-0.0498985
	-0.000156775	-0.162165	-0.107882	-0.425279			0.00600996	-0.128006	0.0995593	-0.0886522
	-0.0330675	-0.1414	-0.137595	-0.430183			0.0193359	-0.143919	0.0792422	-0.158006
	-0.0776653	-0.136542	-0.170512	-0.428296			0.0105229	-0.15173	0.0677673	-0.194027
	-0.0818839	-0.151865	-0.199193	-0.402557			-0.0219139	-0.142596	0.0714366	-0.18992
	-0.0361679	-0.176729	-0.200644	-0.375583			-0.0484929	-0.126303	0.0732939	-0.169314
	0.00860203	-0.186698	-0.163789	-0.372026			-0.0514658	-0.1153	0.0660211	-0.136441
	-0.00115473	-0.169488	-0.120279	-0.372087			-0.0345693	-0.113153	0.0670171	-0.110554
	-0.0595453	-0.14191	-0.107167	-0.365803			-0.0139585	-0.115508	0.0784268	-0.116231
	-0.114315	-0.125375	-0.124138	-0.372693			-0.00745262	-0.117846	0.0768931	-0.121906
	-0.130234	-0.119367	-0.149974	-0.390898			-0.00953027	-0.117864	0.0572448	-0.0890375
	-0.111889	-0.114628	-0.171355	-0.404755			0.00908366	-0.122695	0.037981	-0.0449242
	-0.092018	-0.112643	-0.174831	-0.423942			0.0558569	-0.141622	0.0307047	-0.0231121
	-0.099879	-0.121828	-0.158773	-0.457307			0.0901375	-0.165712	0.0391513	-0.0135666
	-0.113939	-0.139104	-0.150765	-0.482953			0.0753753	-0.176037	0.0637641	-0.0170864
	-0.0883237	-0.157971	-0.159494	-0.494835			0.0237409	-0.165157	0.0842731	-0.0468469
	-0.0306298	-0.172535	-0.157837	-0.501151			-0.0222288	-0.140453	0.0784349	-0.0851292
	0.00683703	-0.173016	-0.137791	-0.489129			-0.0298662	-0.116912	0.0608235	-0.110278
	-0.00441685	-0.154186	-0.121856	-0.451043			0.00170053	-0.108023	0.0581965	-0.127148
	-0.0506534	-0.131869	-0.121508	-0.419124			0.0405003	-0.112051	0.0665226	-0.129764
	-0.0947123	-0.12186	-0.128772	-0.420512			0.0568587	-0.109823	0.068699	-0.0947093
	-0.10226	-0.121754	-0.146415	-0.442676			0.0626332	-0.0938993	0.0600442	-0.0280017
	-0.0812857	-0.12244	-0.173414	-0.468948			0.0864163	-0.0790093	0.0418328	0.0368883
	-0.0741286	-0.123116	-0.192524	-0.493564			0.121031	-0.0827738	0.0192534	0.0858215
	-0.0950452	-0.123388	-0.206714	-0.511461			0.129361	-0.103138	0.0121384	0.110721
	-0.116272	-0.12856	-0.229742	-0.518207			0.0896738	-0.1194	0.0289893	0.0860711
	-0.11666	-0.153982	-0.243301	-0.521884			0.0241559	-0.113444	0.0422804	0.010229
	-0.103747	-0.193516	-0.226219	-0.526977			-0.0205843	-0.0922323	0.0313501	-0.0759982
	-0.0885354	-0.208417	-0.193489	-0.519582			-0.0151454	-0.0775776	0.011222	-0.139429
	-0.0776516	-0.178262	-0.158887	-0.497586			0.0271856	-0.0803098	0.0017918	-0.175368
	-0.0805244	-0.132783	-0.117847	-0.477705			0.0673545	-0.094254	-0.00139272	-0.177479
	-0.0872663	-0.107157	-0.0838834	-0.468286			0.0725718	-0.105105	-0.00497252	-0.146353
	-0.0719373	-0.103399	-0.0699106	-0.466717			0.0500994	-0.111133	-0.0102516	-0.116061
	-0.0408513	-0.10652	-0.0503275	-0.474369			0.0352037	-0.126915	-0.0239273	-0.109335
	-0.0270621	-0.104829	-0.017163	-0.488864			0.0459743	-0.15852	-0.0407638	-0.109358
	-0.0386562	-0.0963271	-0.00913033	-0.494162			0.0661425	-0.186882	-0.0619649	-0.105511
	-0.061774	-0.0958485	-0.039724	-0.490741			0.0782654	-0.189434	-0.0394848	-0.101835
	-0.0833523	-0.116175	-0.0803683	-0.487697			0.08545	-0.165943	-0.0284915	-0.0761218
	-0.0893568	-0.143676	-0.109253	-0.472819			0.101077	-0.132004	-0.0210873	-0.00928412
	-0.0845076	-0.153297	-0.112901	-0.433831			0.132645	-0.100105	-0.000903648	0.0630076
	-0.091179	-0.14221	-0.0823855	-0.387411			0.164318	-0.0753476	0.0261478	0.107747
	-0.109607	-0.126896	-0.042286	-0.34913			0.165215	-0.0590356	0.0514745	0.133898
	-0.1105	-0.124724	-0.0345771	-0.312565			0.125727	-0.0512927	0.0759753	0.139131
	-0.0858355	-0.137098	-0.052808	-0.279123			0.0807844	-0.0510043	0.0936993	0.115079
	-0.0597978	-0.153267	-0.0577978	-0.263434			0.0722115	-0.0615744	0.0909375	0.0978669
	-0.053332	-0.160076	-0.0465406	-0.261475			0.0980907	-0.0877977	0.0762236	0.117637
	-0.0570549	-0.158957	-0.0347352	-0.265681			0.119153	-0.122326	0.0651506	0.144374
	-0.0398125	-0.162776	-0.0229951	-0.285811			0.105887	-0.150435	0.0541397	0.160942
	0.0102212	-0.176685	-0.0180661	-0.31106			0.0639248	-0.164628	0.0389387	0.184181
	0.0645221	-0.191238	-0.0258152	-0.310711			0.0250766	-0.161435	0.0253763	0.193006
	0.077833	-0.193107	-0.0257995	-0.290742			0.0132034	-0.143436	0.0157236	0.161728
	0.0294202	-0.177965	-0.00527135	-0.276131			0.0136722	-0.121308	0.0139409	0.117751
	-0.0505355	-0.156157	0.00305172	-0.260768			-0.00308444	-0.105472	0.0324209	0.081199
	-0.102189	-0.143996	-0.0218851	-0.246793			-0.030801	-0.0998111	0.0608914	0.0334485
	-0.0975542	-0.147674	-0.0546957	-0.258756			-0.0381836	-0.102725	0.0671627	-0.0143985
	-0.0615195	-0.156597	-0.0722345	-0.287447			-0.00870771	-0.114142	0.0471439	-0.0323179
	-0.0310925	-0.155543	-0.0723812	-0.301821			0.0444995	-0.135553	0.0228609	-0.0332215
	-0.0265745	-0.143155	-0.0570652	-0.31009			0.0912109	-0.161992	0.000849157	-0.0303759
	-0.0463473	-0.125651	-0.0421634	-0.322805			0.100829	-0.181332	-0.020895	-0.0046301
	-0.0713851	-0.117017	-0.0532933	-0.313748			0.0797288	-0.185026	-0.0337163	0.0321136
	-0.0880174	-0.127256	-0.0832718	-0.282384			0.0734917	-0.175373	-0.0354464	0.0344513
	-0.0987414	-0.145268	-0.0926373	-0.264066			0.10649	-0.161335	-0.031393	0.00430362
	-0.105421	-0.145909	-0.0696622	-0.269343			0.15241	-0.150776	-0.0142593	-0.0242526
	-0.0945643	-0.125107	-0.0456921	-0.292236			0.167535	-0.145595	0.0128812	-0.049934
	-0.0577006	-0.105604	-0.0427645	-0.340726			0.137566	-0.140592	0.0259954	-0.062843
	-0.0131626	-0.102717	-0.0545726	-0.403623			0.0893524	-0.135326	0.0148499	-0.0281969
	0.00956649	-0.10261	-0.0731662	-0.431441			0.0711677	-0.139957	-0.00290627	0.0434737
	0.00272123	-0.0919998	-0.0861905	-0.409299			0.0991241	-0.160568	-0.01946	0.100967
	-0.019167	-0.0741563	-0.0822292	-0.369284			0.133345	-0.190182	-0.0376304	0.132851
	-0.0358547	-0.0614967	-0.0775614	-0.332656			0.130753	-0.209788	-0.046846	0.154383
	-0.0310169	-0.0661023	-0.0912385	-0.306847			0.0973542	-0.203571	-0.0402801	0.162181
	-0.0130494	-0.0917503	-0.103844	-0.308727			0.0711973	-0.17942	-0.0342564	0.171135
	-0.0118149	-0.11767	-0.087764	-0.332787			0.0724531	-0.156117	-0.0358738	0.200343
	-0.0249035	-0.118009	-0.0598046	-0.345491			0.0943907	-0.146146	-0.0337546	0.222355
	-0.0221731	-0.101004	-0.0449525	-0.346486			0.121029	-0.15018	-0.0266655	0.195282
	-0.00277991	-0.0974366	-0.0455915	-0.361613			0.134575	-0.1613	-0.0229592	0.127945
	0.0131666	-0.107363	-0.0658187	-0.390768			0.13193	-0.168041	-0.0179368	0.0508214
	0.0161217	-0.107794	-0.1009	-0.415921			0.130201	-0.166359	-0.00859761	-0.0283268
	0.00195421	-0.0928435	-0.122864	-0.429329			0.138307	-0.165644	-0.00751496	-0.0942689
	-0.021706	-0.0711708	-0.122084	-0.425763			0.135749	-0.173429	-0.0147475	-0.116753
	-0.0272938	-0.0540894	-0.128344	-0.404174			0.104572	-0.183376	-0.0183359	-0.0876276
	-0.00817891	-0.057692	-0.154516	-0.391167			0.0559027	-0.182296	-0.0167504	-0.0229685
	0.0070906	-0.0827053	-0.175154	-0.412534			0.0239038	-0.167471	-0.0160262	0.0679424
	0.00166657	-0.0999845	-0.17854	-0.454293			0.0346616	-0.14955	-0.00957182	0.169104
	-0.0146725	-0.0895275	-0.175525	-0.48447			0.082462	-0.144429	0.00938828	0.237045
	-0.0299872	-0.0719404	-0.164498	-0.493412			0.131148	-0.158711	0.0281803	0.256957
	-0.0354475	-0.0753884	-0.149138	-0.491486			0.149034	-0.182878	0.0376272	0.261174
	-0.0267195	-0.101311	-0.147174	-0.482378			0.139157	-0.19617	0.0448143	0.268766
	-0.0173056	-0.134855	-0.148012	-0.477018			0.130667	-0.191061	0.054883	0.270326
	-0.0274909	-0.153927	-0.130446	-0.487889			0.139873	-0.183881	0.0646407	0.270317
	-0.0477731	-0.143771	-0.115266	-0.508412			0.147809	-0.185626	0.077077	0.279154
	-0.0522984	-0.11756	-0.129594	-0.529319			0.133439	-0.188522	0.0905861	0.288211
	-0.0428437	-0.107158	-0.159368	-0.558549			0.105269	-0.18577	0.0844317	0.309418
	-0.0395122	-0.117241	-0.185534	-0.593612			0.0876742	-0.177983	0.0528206	0.369127
	-0.0387712	-0.122359	-0.205418	-0.613788			0.0927663	-0.172803	0.0194237	0.448295
	-0.0292669	-0.103646	-0.203019	-0.612523			0.113626	-0.180991	0.00408641	0.500181
	-0.012213	-0.0694916	-0.176288	-0.593512			0.128591	-0.203112	0.0036676	0.516327
	0.0115011	-0.0410664	-0.160552	-0.548359			0.12076	-0.222719	0.0137965	0.502389
	0.0320089	-0.0367513	-0.168143	-0.486324			0.101266	-0.224721	0.0295357	0.446032
	0.0293073	-0.0525468	-0.171608	-0.444827			0.0996355	-0.210245	0.0390899	0.367953
	0.00682437	-0.0652434	-0.161279	-0.442155			0.123983	-0.190708	0.043115	0.319303
	-0.0135852	-0.0632496	-0.155778	-0.460748			0.150438	-0.174099	0.0509224	0.299007
	-0.0259096	-0.0565453	-0.158858	-0.484446			0.151192	-0.157922	0.0565651	0.278638
	-0.0391897	-0.0575921	-0.159809	-0.500953			0.119199	-0.134274	0.0474497	0.271384
	-0.0553689	-0.0678184	-0.1618	-0.486999			0.0735384	-0.107771	0.0334159	0.292028
	-0.0662102	-0.0758338	-0.159591	-0.443884			0.046508	-0.0961868	0.0281865	0.321318
	-0.0566185	-0.0681466	-0.14039	-0.404496			0.0468326	-0.111255	0.0251095	0.368602
	-0.0212027	-0.0464657	-0.123143	-0.377736			0.0515058	-0.146584	0.0232246	0.457323
	0.0238207	-0.0331456	-0.133924	-0.347512			0.0415537	-0.176914	0.0294759	0.545052
	0.0550801	-0.0410702	-0.157569	-0.325996			0.0295542	-0.181692	0.0354714	0.583202
	0.0575144	-0.0564769	-0.164163	-0.327056			0.0349932	-0.166505	0.0337324	0.581537
	0.0402058	-0.0606907	-0.15288	-0.329184			0.0572234	-0.155786	0.0375652	0.545341
	0.0291898	-0.0514376	-0.135531	-0.323783			0.0793247	-0.164131	0.0501324	0.463841
	0.0334802	-0.0449837	-0.120127	-0.323563			0.0811052	-0.178683	0.0563466	0.370291
	0.0382742	-0.0584303	-0.12387	-0.314495			0.0622773	-0.177085	0.0612865	0.302177
	0.0354979	-0.090806	-0.148515	-0.287826			0.0502354	-0.160342	0.0779017	0.234813
	0.0265927	-0.117997	-0.160815	-0.274254			0.0661118	-0.146648	0.0962801	0.150184
	0.0162241	-0.116852	-0.141677	-0.284256			0.0911249	-0.14507	0.106897	0.0785955
	0.0128665	-0.086649	-0.117358	-0.279617			0.0932482	-0.150339	0.117292	0.0293078
	0.0128371	-0.05472	-0.116134	-0.252486			0.0643422	-0.150306	0.122106	-0.0124093
	-0.000838568	-0.0453488	-0.134114	-0.229996			0.020199	-0.134974	0.11224	-0.0264461
	-0.0267319	-0.0554071	-0.153067	-0.213894			-0.0089732	-0.112372	0.101999	5.93494e-05
	-0.0396669	-0.0633346	-0.158662	-0.193896			-0.00173828	-0.102257	0.101902	0.0231144
	-0.0234087	-0.0605233	-0.139868	-0.175877			0.0269905	-0.109424	0.103138	0.0231153
	0.00491672	-0.0558984	-0.10365	-0.156119			0.0461631	-0.119036	0.10926	0.030118
	0.0162311	-0.060856	-0.0813358	-0.116965			0.0494265	-0.122126	0.135706	0.0490125
	0.00147291	-0.0779272	-0.077359	-0.073405			0.0544288	-0.11594	0.168349	0.0526591
	-0.0227076	-0.0972954	-0.0646729	-0.0546189			0.0690243	-0.105579	0.182446	0.039576
	-0.0296657	-0.100557	-0.045376	-0.0480241			0.0819341	-0.10355	0.183313	0.0153061
	-0.00531836	-0.088122	-0.0512536	-0.0283314			0.0719864	-0.111844	0.184301	-0.0320909
	0.029348	-0.0865753	-0.0904871	-0.00186447			0.029683	-0.121853	0.180452	-0.0852627
	0.0351757	-0.110554	-0.143669	0.0223724			-0.0300715	-0.127671	0.173342	-0.115435
	0.016358	-0.138881	-0.194371	0.0526204			-0.0670563	-0.133773	0.171918	-0.135824
	0.0113852	-0.14868	-0.220366	0.0786472			-0.0508827	-0.148759	0.169173	-0.160162
	0.0307611	-0.14228	-0.21018	0.0855152			6.57447e-05	-0.174934	0.162098	-0.165008
	0.0587142	-0.125907	-0.197058	0.0859748			0.0344066	-0.199598	0.1669	-0.141399
	0.0698904	-0.105031	-0.209669	0.0914912			0.0252237	-0.205203	0.182566	-0.122978
	0.0339086	-0.0942156	-0.224928	0.0948079			-0.00661079	-0.191501	0.181167	-0.127869
	-0.037902	-0.0916464	-0.215332	0.0986744			-0.0219876	-0.178182	0.155956	-0.144768
	-0.0849911	-0.0755108	-0.190661	0.122665			-0.00263939	-0.180828	0.129435	-0.179025
	-0.0783295	-0.0499271	-0.16743	0.161021			0.0283345	-0.194545	0.119103	-0.239425
	-0.055289	-0.0398141	-0.150891	0.193639			0.0319796	-0.202832	0.127938	-0.300328
	-0.0564093	-0.0506829	-0.15059	0.214063			0.00314726	-0.194473	0.14802	-0.331692
	-0.0805519	-0.0662695	-0.157909	0.222402			-0.0196997	-0.173379	0.16204	-0.340452
	-0.0948837	-0.0783972	-0.140216	0.216806			-0.00344724	-0.159799	0.153142	-0.339018
	-0.0684125	-0.0769717	-0.104446	0.202555			0.0373124	-0.167659	0.130862	-0.324085
	-0.00693748	-0.0575525	-0.0999724	0.18961			0.0587524	-0.183831	0.124379	-0.313465
	0.0385137	-0.0407902	-0.135555	0.165427			0.0405535	-0.183154	0.13245	-0.332384
	0.0260201	-0.0473824	-0.176385	0.109189			0.0083421	-0.168584	0.138284	-0.368158
	-0.0186381	-0.0645246	-0.201728	0.0333823			-8.05652e-06	-0.159826	0.136184	-0.402864
	-0.0351085	-0.0748168	-0.200034	-0.035825			0.0297837	-0.167286	0.134702	-0.440459
	-0.010521	-0.0819759	-0.166297	-0.0951971			0.0755061	-0.189053	0.138005	-0.465249
	0.0177273	-0.0934135	-0.132494	-0.150493			0.0909582	-0.208103	0.153235	-0.451772
	0.023983	-0.105655	-0.132908	-0.201379			0.05902	-0.204672	0.188216	-0.425993
	0.0156908	-0.113435	-0.147894	-0.252058			0.0194502	-0.185872	0.23051	-0.427001
	0.0190989	-0.108912	-0.147509	-0.298089			0.022233	-0.179698	0.258796	-0.441047
	0.0569941	-0.0866723	-0.147937	-0.316564			0.0688478	-0.193934	0.272714	-0.444189
	0.103065	-0.0600097	-0.169464	-0.305308			0.120969	-0.209836	0.280174	-0.446044
	0.101476	-0.0493816	-0.205193	-0.289887			0.135135	-0.20898	0.275054	-0.441026
	0.046465	-0.0539693	-0.243545	-0.271832			0.100158	-0.19314	0.257841	-0.409242
	-0.00946825	-0.0641985	-0.266255	-0.229626			0.0514497	-0.18108	0.240213	-0.375797
	-0.0173104	-0.0758337	-0.249698	-0.167588			0.0295354	-0.190363	0.226933	-0.366112
	0.0246812	-0.0859121	-0.203576	-0.106223			0.0273954	-0.213258	0.215555	-0.360514
	0.0714279	-0.0970218	-0.175388	-0.0553708			0.00604291	-0.226918	0.210422	-0.359586
	0.0707459	-0.113497	-0.180646	-0.0337			-0.048522	-0.223218	0.210694	-0.397339
	0.0225301	-0.127184	-0.185711	-0.0590598			-0.108016	-0.214829	0.204739	-0.457533
	-0.0213812	-0.123134	-0.174632	-0.102583			-0.130636	-0.219024	0.200358	-0.492938
	-0.0140533	-0.10886	-0.158947	-0.12518			-0.0968519	-0.239207	0.211542	-0.508607
	0.0313488	-0.104784	-0.146385	-0.132384			-0.0292055	-0.259367	0.225831	-0.512989
	0.0503073	-0.117609	-0.144264	-0.136607			0.0261743	-0.261279	0.223063	-0.490001
	0.00608678	-0.13263	-0.155497	-0.121191			0.0520493	-0.24218	0.204872	-0.461284
	-0.05935	-0.130868	-0.156349	-0.0974066			0.072921	-0.220177	0.176219	-0.46054
	-0.0840744	-0.107223	-0.125093	-0.099053			0.101218	-0.210643	0.141849	-0.459367
	-0.0573115	-0.0804373	-0.0868388	-0.117543			0.116317	-0.207257	0.12366	-0.424087
	-0.0174362	-0.0714735	-0.0783846	-0.133047			0.0975993	-0.194866	0.132255	-0.384084
	-0.00929085	-0.0811075	-0.095316	-0.158896			0.0463469	-0.170124	0.144307	-0.365751
	-0.0337734	-0.0896797	-0.111151	-0.200366			-0.0102573	-0.146414	0.148177	-0.36186
	-0.0368458	-0.0827664	-0.116042	-0.238529			-0.0287526	-0.151149	0.159137	-0.375405
	0.0153066	-0.0663992	-0.111512	-0.280009			0.00668995	-0.194555	0.175317	-0.399841
	0.0871068	-0.0547378	-0.110607	-0.33553			0.0540841	-0.243297	0.180503	-0.393412
	0.121002	-0.0515015	-0.139424	-0.373898			0.0711701	-0.255954	0.173561	-0.355384
	0.103131	-0.0551316	-0.202871	-0.373791			0.064392	-0.236155	0.156217	-0.344874
	0.0688132	-0.0643548	-0.260668	-0.356191			0.065423	-0.223432	0.124942	-0.377219
	0.0606106	-0.0796807	-0.273123	-0.339102			0.0917099	-0.243227	0.0951017	-0.40738
	0.0870421	-0.103439	-0.252535	-0.316689			0.132278	-0.285904	0.086972	-0.413342
	0.110917	-0.136068	-0.229012	-0.295249			0.152249	-0.314294	0.0901361	-0.40007
	0.0891921	-0.164033	-0.212677	-0.284632			0.125751	-0.303333	0.0878819	-0.362947
	0.0325084	-0.160248	-0.207496	-0.27088			0.0733217	-0.273468	0.0878599	-0.315737
	0.00378205	-0.116036	-0.206203	-0.252421			0.0385349	-0.263771	0.0951564	-0.296229
	0.0360634	-0.0566706	-0.194133	-0.250117			0.036284	-0.283688	0.0951957	-0.30751
	0.0904271	-0.0164726	-0.183432	-0.260215			0.0446983	-0.307443	0.0914208	-0.328999
	0.112741	-0.00474768	-0.202303	-0.250054			0.0432197	-0.305065	0.0984814	-0.358477
	0.0867334	-0.00962231	-0.238336	-0.221801			0.0381246	-0.27602	0.109345	-0.388445
	0.0395478	-0.0143861	-0.249863	-0.203172			0.0461692	-0.246125	0.112085	-0.39886
	0.0299009	-0.00798251	-0.235796	-0.205503			0.0737082	-0.236186	0.109955	-0.397898
	0.0791127	0.00351186	-0.223746	-0.233305			0.107436	-0.238616	0.105121	-0.417156
	0.130379	-0.00550597	-0.220761	-0.28709			0.121317	-0.232245	0.0888785	-0.449751
	0.129153	-0.0344341	-0.226039	-0.344713			0.101451	-0.209154	0.0703748	-0.458373
	0.0959184	-0.0499195	-0.242222	-0.376016			0.0731291	-0.187281	0.0641993	-0.444609
	0.0778823	-0.0376777	-0.255861	-0.381337			0.0731563	-0.189408	0.0654148	-0.438752
	0.091261	-0.0191371	-0.258714	-0.3765			0.104683	-0.218829	0.065612	-0.44799
	0.116129	-0.0123586	-0.275825	-0.36235			0.13337	-0.250253	0.0682123	-0.466198
	0.111372	-0.0182686	-0.318272	-0.342267			0.125974	-0.258494	0.0758621	-0.496116
	0.0604144	-0.0285553	-0.350611	-0.330002			0.0881233	-0.245775	0.0790002	-0.526091
	0.0104653	-0.0280441	-0.347104	-0.333503			0.0572238	-0.234914	0.0772544	-0.537698
	0.0275925	-0.0103827	-0.318614	-0.348494			0.0636191	-0.237012	0.0807133	-0.551614
	0.109826	0.00221759	-0.271885	-0.379293			0.0966726	-0.236018	0.0844322	-0.591454
	0.179294	-0.0117459	-0.218186	-0.430813			0.118708	-0.216322	0.0819264	-0.635482
	0.1754	-0.0406861	-0.187815	-0.481624			0.106291	-0.184339	0.0814178	-0.665853
	0.117227	-0.0576155	-0.177751	-0.508742			0.0851134	-0.162118	0.0909889	-0.701079
	0.0695501	-0.055784	-0.155869	-0.512153			0.100691	-0.172429	0.100587	-0.741751
	0.075785	-0.0449901	-0.12586	-0.492791			0.154996	-0.213839	0.105564	-0.768366
	0.120385	-0.0346387	-0.115612	-0.456611			0.204518	-0.253876	0.112184	-0.791612
	0.14469	-0.0275151	-0.122241	-0.432288			0.215158	-0.267875	0.116601	-0.822089
	0.120959	-0.0177549	-0.129434	-0.432728			0.189983	-0.263792	0.112417	-0.841286
	0.0953721	0.00236217	-0.13836	-0.431693			0.15935	-0.263437	0.108923	-0.855097
	0.114571	0.0251424	-0.141073	-0.417429			0.154915	-0.271941	0.114507	-0.889233
	0.159029	0.0295005	-0.128745	-0.411673			0.176056	-0.273646	0.122603	-0.918269
	0.17949	0.0161015	-0.124558	-0.4205			0.191189	-0.249873	0.136968	-0.903374
	0.155494	0.00490894	-0.143942	-0.437439			0.182303	-0.205029	0.160486	-0.875562
	0.112609	0.0119639	-0.162834	-0.47021			0.162562	-0.169836	0.177544	-0.870046
	0.0998874	0.0353925	-0.159459	-0.510542			0.152715	-0.175673	0.175101	-0.87117
	0.133367	0.0555999	-0.148626	-0.524758			0.157534	-0.219423	0.162759	-0.878247
	0.171662	0.0512831	-0.143297	-0.510671			0.164574	-0.266024	0.149791	-0.912051
	0.160248	0.0310336	-0.138837	-0.496687			0.153215	-0.282226	0.135842	-0.956311
	0.0928735	0.025131	-0.139434	-0.490778			0.122378	-0.273192	0.133122	-0.992589
	0.0247958	0.0443831	-0.139727	-0.495637			0.102147	-0.268744	0.149294	-1.0437
	0.0175374	0.0668597	-0.117974	-0.529547			0.117395	-0.282355	0.167046	-1.10299
	0.0661049	0.0697977	-0.0858929	-0.577964			0.151826	-0.297814	0.175537	-1.12681
	0.112114	0.0485705	-0.0853925	-0.595823			0.168167	-0.292189	0.180416	-1.11756
	0.110379	0.0203086	-0.120436	-0.589787			0.155635	-0.266464	0.175558	-1.10411
	0.0678531	0.00864264	-0.155401	-0.60028			0.130239	-0.247769	0.155382	-1.08276
	0.0334038	0.0186464	-0.167535	-0.619819			0.114977	-0.256463	0.139064	-1.06159
	0.043865	0.0261726	-0.158049	-0.62688			0.123029	-0.282071	0.139407	-1.08096
	0.0663534	0.00861934	-0.132867	-0.623557			0.138438	-0.296894	0.144124	-1.13749
	0.0418363	-0.0241837	-0.103588	-0.605191			0.130713	-0.283214	0.14801	-1.18909
	-0.0191576	-0.042354	-0.0813146	-0.567659			0.103719	-0.254884	0.155078	-1.23266
	-0.0478438	-0.0377487	-0.0545257	-0.543338			0.0917364	-0.241538	0.151127	-1.2785
	-0.00562847	-0.027259	-0.0134181	-0.552501			0.110947	-0.25362	0.129436	-1.30506
	0.0751028	-0.0260176	0.0189909	-0.56284			0.150698	-0.273756	0.109222	-1.30371
	0.121582	-0.039445	0.020471	-0.558099			0.186124	-0.282449	0.0986038	-1.29323
	0.0923579	-0.0548305	0.00402569	-0.558481			0.188223	-0.280717	0.0887273	-1.26533
	0.0228497	-0.0477422	-0.00813394	-0.571053			0.155674	-0.28765	0.0828059	-1.20498
	-0.0206918	-0.0169616	-0.0150062	-0.58214			0.123394	-0.316685	0.0897882	-1.14449
	-0.01909	0.00305147	-0.014699	-0.596124			0.116696	-0.355547	0.0989631	-1.12374
	-0.0153969	-0.00993388	-0.00418491	-0.622469			0.118029	-0.370604	0.0995517	-1.1419
	-0.0450773	-0.0377364	-0.000986963	-0.646813			0.104833	-0.346558	0.0951656	-1.18963
	-0.08991	-0.050993	-0.0076661	-0.658856			0.0813484	-0.303299	0.0847892	-1.26353
	-0.106814	-0.043952	0.0039699	-0.664472			0.0696325	-0.280721	0.0644319	-1.33632
	-0.0731804	-0.0293409	0.035801	-0.662391			0.0799641	-0.293759	0.0536867	-1.38329
	-0.00253805	-0.0245755	0.051281	-0.650492			0.100485	-0.314077	0.0712552	-1.41462
	0.0513771	-0.0367508	0.0346197	-0.653067			0.111082	-0.307206	0.102586	-1.43742
	0.0420818	-0.0541823	0.0031186	-0.688466			0.100599	-0.277808	0.1245	-1.43799
	-0.00073238	-0.0573518	-0.0287103	-0.734645			0.0825731	-0.261081	0.132245	-1.4228
	-0.00896238	-0.051103	-0.0483758	-0.766253			0.0811747	-0.28677	0.129916	-1.41944
	0.0267677	-0.06235	-0.0472635	-0.778499			0.0975313	-0.346812	0.116682	-1.4335
	0.0641035	-0.094533	-0.051385	-0.77711			0.105197	-0.395402	0.0989401	-1.45554
	0.0683225	-0.118635	-0.0908163	-0.772498			0.0885312	-0.399136	0.0848098	-1.4981
	0.0368671	-0.119804	-0.143139	-0.780504			0.0639999	-0.373699	0.0693972	-1.56755
	0.00477604	-0.106794	-0.170673	-0.799408			0.0623721	-0.355298	0.0501794	-1.63498
	0.0150804	-0.0948719	-0.175309	-0.804709			0.0987977	-0.354045	0.0360169	-1.67906
	0.0520439	-0.0989356	-0.171846	-0.790059			0.156017	-0.354548	0.0320275	-1.71047
	0.0543914	-0.120353	-0.160891	-0.779151			0.200501	-0.344495	0.0267269	-1.72537
	0.00190015	-0.137983	-0.153821	-0.790514			0.213318	-0.333234	0.0148903	-1.70182
	-0.0579883	-0.136406	-0.162249	-0.816885			0.201631	-0.344357	0.00548821	-1.65308
	-0.07013	-0.129171	-0.168454	-0.844751			0.18655	-0.388607	-0.00198401	-1.6099
	-0.0298716	-0.138856	-0.167343	-0.862371			0.175876	-0.445009	-0.0112716	-1.5782
	0.0216458	-0.170051	-0.187031	-0.855114			0.154741	-0.479286	-0.0102315	-1.56442
	0.035936	-0.204324	-0.223663	-0.830339			0.114861	-0.472618	0.00574044	-1.58166
	0.00252602	-0.217802	-0.240427	-0.816171			0.0710964	-0.442524	0.0155633	-1.60672
	-0.0357383	-0.199629	-0.231683	-0.815466			0.037105	-0.421485	0.00964311	-1.60937
	-0.0329057	-0.164331	-0.216164	-0.812354			0.014707	-0.422149	-0.00672474	-1.61565
	-0.00138812	-0.13759	-0.203033	-0.808177			0.000912713	-0.429359	-0.0325596	-1.64802
	0.0108546	-0.134251	-0.202577	-0.802772			-0.0167453	-0.426557	-0.0659176	-1.67891
	-0.0119052	-0.14349	-0.224099	-0.780728			-0.0491993	-0.416384	-0.084273	-1.69708
	-0.0417611	-0.148685	-0.24254	-0.753389			-0.0800898	-0.420324	-0.0749269	-1.72033
	-0.0469653	-0.149251	-0.229139	-0.749453			-0.0861022	-0.447684	-0.0469435	-1.73665
	-0.0210183	-0.154983	-0.204787	-0.76443			-0.0622566	-0.483389	-0.00435396	-1.73241
	0.00427606	-0.168707	-0.199847	-0.784558			-0.017539	-0.504557	0.0411691	-1.73957
	-0.00276827	-0.181558	-0.21058	-0.821544			0.0287129	-0.502358	0.0600885	-1.7583
	-0.0278306	-0.177682	-0.225869	-0.874377			0.0545668	-0.490031	0.0445176	-1.74812
	-0.0264813	-0.161218	-0.242798	-0.918885			0.0555998	-0.490356	0.0159359	-1.72014
	0.018404	-0.155232	-0.249191	-0.950047			0.05114	-0.507191	-0.0133544	-1.71622
	0.0749099	-0.171266	-0.239383	-0.969337			0.0576396	-0.516944	-0.047488	-1.73325
	0.094586	-0.194981	-0.236974	-0.956303			0.0765305	-0.503625	-0.0768536	-1.76158
	0.068222	-0.208008	-0.25254	-0.915678			0.10217	-0.479352	-0.0912723	-1.82054
	0.0325034	-0.204004	-0.260309	-0.886084			0.123466	-0.465668	-0.0957798	-1.89079
	0.0189419	-0.194112	-0.251223	-0.878795			0.129835	-0.47455	-0.087238	-1.93054
	0.0283318	-0.19797	-0.246483	-0.880324			0.125162	-0.498084	-0.0673356	-1.94938
	0.0389892	-0.221668	-0.252227	-0.90701			0.121442	-0.510612	-0.0566709	-1.96204
	0.028077	-0.246282	-0.256307	-0.971932			0.115732	-0.505197	-0.0807729	-1.94091
	0.000720808	-0.247302	-0.254072	-1.03614			0.09903	-0.506357	-0.109162	-1.88179
	-0.0156235	-0.224628	-0.242127	-1.07615			0.0767818	-0.534031	-0.119074	-1.83123
	-0.0177926	-0.201135	-0.217594	-1.10905			0.0549719	-0.572482	-0.116967	-1.80764
	-0.029381	-0.195479	-0.197558	-1.13722			0.0365682	-0.587839	-0.105233	-1.79896
	-0.0587206	-0.202115	-0.205623	-1.14974			0.034614	-0.566461	-0.0839293	-1.81415
	-0.0893179	-0.209719	-0.230527	-1.16002			0.0555198	-0.532277	-0.0714126	-1.84706
	-0.0989787	-0.211626	-0.242656	-1.17751			0.0784631	-0.516863	-0.0719494	-1.85613
	-0.0671879	-0.206568	-0.245494	-1.1866			0.087013	-0.527965	-0.0687828	-1.83012
	-0.00733775	-0.207076	-0.258154	-1.1954			0.0846954	-0.54044	-0.0646313	-1.80151
	0.0306579	-0.225353	-0.281741	-1.2315			0.0766537	-0.528458	-0.0749269	-1.7848
	0.0169909	-0.242863	-0.312893	-1.28639			0.0644394	-0.494488	-0.0917756	-1.78267
	-0.015963	-0.235435	-0.344711	-1.32597			0.04938	-0.466096	-0.10134	-1.81429
	-0.0168908	-0.212231	-0.35014	-1.33974			0.0258277	-0.463644	-0.106271	-1.86951
	0.0182053	-0.199481	-0.315936	-1.33596			-0.00606179	-0.480689	-0.105803	-1.90848
	0.046658	-0.204304	-0.282072	-1.31687			-0.0231845	-0.493676	-0.0930373	-1.92738
	0.0330022	-0.221137	-0.283754	-1.29746			-0.00783561	-0.487402	-0.0783944	-1.94939
	-0.0165571	-0.242549	-0.305408	-1.29702			0.0239311	-0.476313	-0.0759267	-1.96626
	-0.0504953	-0.255765	-0.327527	-1.30704			0.0412522	-0.490469	-0.0728691	-1.95818
	-0.0245526	-0.255204	-0.345048	-1.30605			0.0328798	-0.533172	-0.0526522	-1.93531
	0.030628	-0.256836	-0.348945	-1.29777			0.0155547	-0.576448	-0.0262846	-1.91233
	0.0393154	-0.266673	-0.344538	-1.29209			0.00723501	-0.588543	-0.005205	-1.88544
	-0.0114659	-0.263258	-0.354957	-1.28178			0.00875941	-0.556982	0.0103366	-1.85342
	-0.0678049	-0.234622	-0.37356	-1.27001			0.012831	-0.508612	0.0190243	-1.826
	-0.0887437	-0.201064	-0.366426	-1.26788			0.0137239	-0.488154	0.0142426	-1.80233
	-0.0705817	-0.181411	-0.335375	-1.27204			0.00883562	-0.503631	0.00386927	-1.78462
	-0.0405207	-0.180113	-0.311858	-1.27458			0.00498051	-0.524695	-0.0111993	-1.79439
	-0.0379677	-0.202541	-0.299588	-1.28038			0.00857272	-0.533893	-0.0359268	-1.82494
	-0.0616768	-0.238594	-0.289842	-1.29349			0.00703418	-0.539033	-0.0689338	-1.83196
	-0.0631599	-0.263981	-0.288311	-1.30551			-0.0200735	-0.553311	-0.0941912	-1.80171
	-0.0221092	-0.274706	-0.288663	-1.31824			-0.0697817	-0.578332	-0.100847	-1.76496
	0.0296165	-0.283035	-0.282348	-1.34476			-0.107214	-0.602976	-0.0994323	-1.73753
	0.0556091	-0.286863	-0.290169	-1.38085			-0.100631	-0.604862	-0.100895	-1.72134
	0.0490054	-0.281278	-0.322892	-1.40769			-0.0518658	-0.580295	-0.104365	-1.73647
	0.0285636	-0.270107	-0.347617	-1.41908			0.00725249	-0.552993	-0.107356	-1.78307
	0.0202919	-0.257427	-0.345462	-1.41771			0.0416263	-0.546799	-0.104976	-1.82925
	0.0316265	-0.246235	-0.342054	-1.39941			0.0364591	-0.557163	-0.0888468	-1.866
	0.038425	-0.24515	-0.348374	-1.37562			0.0126089	-0.564721	-0.0712333	-1.90401
	0.0107242	-0.257628	-0.353563	-1.37087			0.00261005	-0.562987	-0.0814972	-1.92471
	-0.0384558	-0.27758	-0.359368	-1.38404			0.0132903	-0.565126	-0.115365	-1.91175
	-0.0651658	-0.297068	-0.357691	-1.40612			0.0323789	-0.580854	-0.140737	-1.89793
	-0.051214	-0.314006	-0.33087	-1.4511			0.0500355	-0.603784	-0.146048	-1.90715
	-0.0218549	-0.324652	-0.296633	-1.51253			0.0598259	-0.616208	-0.140776	-1.9221
	-0.0112527	-0.326964	-0.292548	-1.55685			0.0613154	-0.608091	-0.135661	-1.94572
	-0.0312972	-0.320409	-0.314509	-1.57966			0.0621589	-0.592148	-0.138783	-1.99407
	-0.0609438	-0.304102	-0.326205	-1.59575			0.057228	-0.586744	-0.151435	-2.04557
	-0.0664715	-0.278529	-0.318371	-1.59554			0.0334063	-0.596532	-0.15347	-2.08626
	-0.0436838	-0.2581	-0.302559	-1.57982			-0.000319148	-0.61337	-0.134231	-2.14266
	-0.0226621	-0.260072	-0.286638	-1.57486			-0.0203912	-0.622897	-0.113958	-2.20512
	-0.0245432	-0.283554	-0.283573	-1.58077			-0.0129417	-0.618362	-0.101605	-2.22993
	-0.0351	-0.317291	-0.295944	-1.57665			0.0163396	-0.614497	-0.0837553	-2.22095
	-0.0249253	-0.346628	-0.30029	-1.57087			0.0430858	-0.627598	-0.0627498	-2.19967
	0.0114334	-0.355292	-0.286425	-1.57245			0.0395629	-0.64917	-0.052439	-2.16101
	0.0394159	-0.344493	-0.284744	-1.55736			0.00731271	-0.658679	-0.0495808	-2.12718
	0.0205482	-0.334034	-0.315132	-1.5268			-0.0224159	-0.649691	-0.0540329	-2.14115
	-0.0435628	-0.330996	-0.352661	-1.51676			-0.0335674	-0.626896	-0.0732525	-2.18442
	-0.104582	-0.327811	-0.37256	-1.53437			-0.0389433	-0.60665	-0.0853291	-2.21709
	-0.103735	-0.320969	-0.375378	-1.55752			-0.053165	-0.604559	-0.0627583	-2.25259
	-0.0349443	-0.315605	-0.365007	-1.5849			-0.0713743	-0.614158	-0.0237366	-2.30324
	0.0332085	-0.315332	-0.350616	-1.61597			-0.0781986	-0.614613	0.000971133	-2.34257
	0.042306	-0.321028	-0.350096	-1.62658			-0.060166	-0.604326	0.00745927	-2.36369
	0.00555008	-0.331349	-0.357673	-1.62276			-0.0283067	-0.594438	-0.00182423	-2.38939
	-0.0302533	-0.342633	-0.34496	-1.63015			-0.021375	-0.593361	-0.0180537	-2.41431
	-0.0387768	-0.343882	-0.310569	-1.63395			-0.0608628	-0.597906	-0.0147187	-2.42364
	-0.0267343	-0.326857	-0.285942	-1.61422			-0.112971	-0.598205	0.00995682	-2.43056
	-0.0248869	-0.303374	-0.282246	-1.59123			-0.128184	-0.58618	0.0205361	-2.4326
	-0.0469141	-0.294162	-0.282041	-1.58231			-0.100712	-0.564389	0.00408525	-2.40443
	-0.0646043	-0.294865	-0.281962	-1.57028			-0.0614008	-0.547715	-0.0116546	-2.3519
	-0.0485516	-0.291789	-0.282856	-1.5442			-0.0444481	-0.549423	-0.00992588	-2.30049
	-0.0144831	-0.279733	-0.278316	-1.48693			-0.0623106	-0.568403	0.00313585	-2.2489
	0.00415116	-0.250669	-0.281282	-1.33494			-0.0860164	-0.59563	0.0212003	-2.20288
	-0.000483275	-0.191646	-0.303937	-1.01615			-0.0730986	-0.621865	0.0319484	-2.2001
	-0.00546369	-0.0961095	-0.320776	-0.519441			-0.0218093	-0.642068	0.0175386	-2.24287
	0.0174093	0.0412666	-0.302164	0.0931446			0.0238613	-0.654655	-0.0119591	-2.29571
	0.0778308	0.217253	-0.259548	0.723872			0.0286911	-0.658099	-0.0361859	-2.34062
	0.1518	0.40238	-0.20819	1.28274			0.00235991	-0.647264	-0.0625283	-2.36937
	0.189733	0.559365	-0.140972	1.75543			-0.0166903	-0.62212	-0.109044	-2.35677
	0.175819	0.689652	-0.0647991	2.22924			-0.0100912	-0.596629	-0.161895	-2.29143
	0.151866	0.832041	0.0125317	2.81433			-0.000827358	-0.582123	-0.190899	-2.20503
	0.161782	1.01144	0.112498	3.53139			-0.0214564	-0.58267	-0.190472	-2.13696
	0.213929	1.22193	0.241949	4.30159			-0.0738106	-0.597612	-0.171816	-2.10333
	0.296474	1.43994	0.367705	5.02132			-0.116725	-0.616941	-0.154539	-2.11037
	0.381178	1.6347	0.471426	5.62195			-0.106153	-0.626887	-0.157675	-2.15383
	0.445184	1.79062	0.567837	6.12591			-0.0484844	-0.632773	-0.179027	-2.20095
	0.509014	1.93796	0.659786	6.64327			0.000896514	-0.640625	-0.191463	-2.22249
	0.603078	2.1179	0.746943	7.26102			0.00500061	-0.646625	-0.179425	-2.23085
	0.70395	2.32923	0.84983	7.94989			-0.0206207	-0.647508	-0.162592	-2.23913
	0.762935	2.5437	0.967451	8.60548			-0.0356626	-0.646335	-0.164371	-2.22833
	0.770929	2.74382	1.06826	9.16091			-0.0172003	-0.641431	-0.178517	-2.1934
	0.76241	2.91779	1.15377	9.62597			0.0233831	-0.635072	-0.183582	-2.15501
	0.779287	3.06837	1.24712	10.0688			0.0529665	-0.633361	-0.170714	-2.11455
	0.838644	3.21895	1.33413	10.5698			0.0496675	-0.635016	-0.144313	-2.07184
	0.909458	3.38483	1.39428	11.1429			0.0272983	-0.631766	-0.115579	-2.05451
	0.946774	3.55368	1.44511	11.7128			0.0185822	-0.622976	-0.10014	-2.06766
	0.946808	3.70937	1.50565	12.2019			0.0322818	-0.613433	-0.0932786	-2.08752
	0.954201	3.84598	1.57524	12.6081			0.0442572	-0.607312	-0.0725438	-2.116
	1.00022	3.97028	1.66036	12.9819			0.0321716	-0.607147	-0.0361808	-2.16052
	1.06421	4.09811	1.75885	13.3845			-0.000491503	-0.614764	-0.0114269	-2.18993
	1.11065	4.24726	1.84143	13.8615			-0.0354151	-0.627525	-0.00786585	-2.18666
	1.12958	4.42011	1.90927	14.3838			-0.0547874	-0.635911	-0.0125488	-2.18408
	1.13212	4.60096	2.00141	14.8552			-0.0626963	-0.634208	-0.0168602	-2.19571
	1.13726	4.776	2.12533	15.2341			-0.0812301	-0.624246	-0.00759222	-2.19995
	1.15741	4.93626	2.25105	15.5726			-0.111973	-0.610062	0.0223024	-2.20798
	1.18261	5.07548	2.36296	15.925			-0.124059	-0.599552	0.0495563	-2.23579
	1.20236	5.199	2.46725	16.3129			-0.098438	-0.60053	0.0469199	-2.25436
	1.23072	5.32359	2.56852	16.743			-0.0533222	-0.606804	0.0260665	-2.24838
	1.28171	5.45381	2.6772	17.1739			-0.0209877	-0.610103	0.0128876	-2.24443
	1.34327	5.5815	2.7957	17.5435			-0.0283231	-0.608108	0.00865902	-2.24109
	1.39101	5.70482	2.88824	17.8568			-0.0683003	-0.607564	0.00344997	-2.22325
	1.40937	5.82354	2.92993	18.1707			-0.0948245	-0.615952	-0.00613453	-2.22602
	1.40466	5.93892	2.96017	18.5082			-0.0718057	-0.632276	-0.0346841	-2.26945
	1.40034	6.06816	3.02862	18.8636			-0.0187805	-0.64051	-0.0644268	-2.32255
	1.42074	6.21909	3.13316	19.2306			0.014939	-0.63476	-0.0605039	-2.37257
	1.4688	6.37152	3.24529	19.5644			0.00419682	-0.63183	-0.0285888	-2.41993
	1.52321	6.50632	3.34922	19.8222			-0.0348773	-0.650208	-0.0106645	-2.4282
	1.55555	6.62754	3.43575	20.0513			-0.0642442	-0.684941	-0.0204024	-2.38117
	1.56693	6.74493	3.50821	20.3356			-0.0607368	-0.714842	-0.0413268	-2.32074
	1.58088	6.86772	3.58767	20.687			-0.0447089	-0.71973	-0.0616121	-2.27315
	1.60941	7.00163	3.67559	21.0616			-0.0573176	-0.69797	-0.0704652	-2.23247
	1.64911	7.14353	3.74458	21.4237			-0.100337	-0.665694	-0.0616164	-2.21741
	1.68493	7.27564	3.79034	21.7319			-0.128909	-0.640985	-0.058694	-2.25026
	1.69167	7.38834	3.83676	21.9665			-0.113489	-0.632515	-0.0768377	-2.29988
	1.67091	7.49158	3.88973	22.1816			-0.0709621	-0.638445	-0.0882561	-2.33012
	1.66156	7.59794	3.93535	22.4324			-0.0389215	-0.64966	-0.0728116	-2.34894
	1.68751	7.7248	3.97139	22.7019			-0.0407273	-0.662599	-0.0543108	-2.36034
	1.72847	7.83688	4.00506	22.9511			-0.0660566	-0.676264	-0.0588931	-2.35441
	1.75772	7.95019	4.03209	23.178			-0.0732075	-0.6856	-0.0765915	-2.34507
	1.76506	8.0603	4.06236	23.3935			-0.0430027	-0.682112	-0.105107	-2.34643
	1.76266	8.16294	4.11788	23.6239			-0.0156797	-0.658686	-0.128308	-2.34062
	1.78464	8.26885	4.18617	23.9181			-0.034196	-0.621794	-0.130978	-2.32478
	1.84512	8.38497	4.23932	24.283			-0.0839779	-0.59106	-0.123568	-2.3273
	1.90637	8.50209	4.28372	24.6526			-0.11451	-0.582454	-0.133338	-2.34857
	1.92368	8.61438	4.33823	24.96			-0.097612	-0.5889	-0.157998	-2.36879
	1.90714	8.71958	4.39441	25.2005			-0.0515903	-0.596197	-0.171935	-2.39253
	1.89875	8.81155	4.44434	25.3976			-0.0245194	-0.599527	-0.163903	-2.42794
	1.916	8.88879	4.50021	25.5838			-0.0477338	-0.609344	-0.143808	-2.4625
	1.945	8.96921	4.55943	25.8069			-0.101195	-0.634516	-0.124547	-2.48615
	1.9656	9.07002	4.61434	26.0883			-0.132336	-0.668634	-0.113758	-2.50686
	1.95706	9.1827	4.67703	26.3942			-0.117881	-0.68885	-0.11419	-2.52141
	1.92722	9.29289	4.74269	26.6875			-0.0902749	-0.680623	-0.11218	-2.51228
	1.92068	9.40667	4.78529	26.9771			-0.0954015	-0.646697	-0.0932934	-2.48734
	1.96326	9.52627	4.81005	27.2707			-0.134676	-0.607153	-0.0727644	-2.47171
	2.02802	9.64418	4.84348	27.5527			-0.165519	-0.587327	-0.0768526	-2.46325
	2.0843	9.76292	4.88724	27.813			-0.152066	-0.590299	-0.10389	-2.44575
	2.1207	9.88605	4.9406	28.0349			-0.103853	-0.595347	-0.127756	-2.42569
	2.13432	9.99501	5.02166	28.1992			-0.0652666	-0.594481	-0.138915	-2.40528
	2.13352	10.0788	5.11736	28.3393			-0.0685293	-0.598011	-0.145379	-2.37587
	2.13067	10.1531	5.18845	28.5316			-0.0949153	-0.615936	-0.153136	-2.35481
	2.11622	10.2367	5.23778	28.8062			-0.103062	-0.641668	-0.16195	-2.35883
	2.08213	10.3356	5.29275	29.13			-0.0868888	-0.653679	-0.164352	-2.36418
	2.05844	10.4484	5.34848	29.4656			-0.0868878	-0.633811	-0.140732	-2.35613
	2.07759	10.5623	5.39965	29.7778			-0.131027	-0.592562	-0.0896289	-2.3589
	2.1308	10.6596	5.45528	30.0338			-0.190271	-0.563418	-0.0485264	-2.37449
	2.18306	10.7397	5.50109	30.26			-0.208585	-0.564776	-0.0418548	-2.37748
	2.20868	10.8168	5.52363	30.5257			-0.162758	-0.585256	-0.0529368	-2.37701
	2.20587	10.9026	5.55364	30.8462			-0.0845176	-0.60133	-0.0578159	-2.39386
	2.19619	10.9977	5.61667	31.1827			-0.0334011	-0.60636	-0.0508985	-2.41269
	2.20909	11.1003	5.68461	31.51			-0.0401654	-0.614653	-0.0316054	-2.42053
	2.24484	11.2083	5.73311	31.8029			-0.0691467	-0.638519	-0.0128628	-2.43332
	2.26716	11.3157	5.77523	32.041			-0.065071	-0.664736	-0.0184985	-2.44548
	2.25244	11.4198	5.82034	32.2715			-0.0233666	-0.672915	-0.0385073	-2.44063
	2.22531	11.5193	5.872	32.5524			0.00797006	-0.654357	-0.0435895	-2.44917
	2.23281	11.6101	5.94184	32.8517			-0.0114537	-0.624432	-0.0332486	-2.48548
	2.29039	11.6986	6.02173	33.1093			-0.0747566	-0.609432	-0.0234277	-2.50275
	2.36831	11.7965	6.08278	33.3304			-0.134216	-0.621558	-0.0182082	-2.48067
	2.41705	11.9008	6.12342	33.5321			-0.147651	-0.646858	-0.0224328	-2.44999
	2.41721	11.9969	6.16709	33.7243			-0.127304	-0.663945	-0.0388728	-2.41624
	2.3992	12.0835	6.21058	33.9552			-0.121536	-0.667806	-0.0442566	-2.3769
	2.40818	12.1682	6.24368	34.2439			-0.148984	-0.675545	-0.023798	-2.36867
	2.44891	12.2617	6.28492	34.5312			-0.181888	-0.696637	-0.00231898	-2.39203
	2.48259	12.3707	6.34583	34.7747			-0.181967	-0.715681	0.00397843	-2.40783
	2.47501	12.4831	6.40861	35.0042			-0.140004	-0.711401	0.00814691	-2.42253
	2.43948	12.5696	6.46671	35.2339			-0.0858382	-0.684781	0.00737599	-2.46251
	2.41759	12.6258	6.52524	35.4557			-0.0678452	-0.658216	-0.00984761	-2.50993
	2.43044	12.6842	6.56941	35.7			-0.096836	-0.658353	-0.0312852	-2.5383
	2.4603	12.7752	6.58779	35.9724			-0.129171	-0.687371	-0.0435771	-2.54426
	2.47086	12.8927	6.60341	36.2175			-0.123581	-0.716266	-0.049634	-2.50663
	2.44344	13.0087	6.63727	36.4125			-0.0966823	-0.716792	-0.0432333	-2.40968
	2.4133	13.104	6.67297	36.603			-0.0911696	-0.6958	-0.0184582	-2.30057
	2.43203	13.1788	6.69497	36.8139			-0.117803	-0.680063	0.000735716	-2.24325
	2.49993	13.2535	6.70701	37.0359			-0.150268	-0.685	-0.00665385	-2.24939
	2.57353	13.3547	6.71182	37.2721			-0.152283	-0.701646	-0.0279412	-2.30798
	2.61201	13.4754	6.72214	37.5024			-0.112025	-0.703129	-0.0476683	-2.41578
	2.59952	13.5768	6.76403	37.6852			-0.0637908	-0.684522	-0.0622801	-2.53395
	2.55596	13.6444	6.83523	37.8363			-0.0574305	-0.667301	-0.0660208	-2.60882
	2.52987	13.7008	6.89511	38.0205			-0.0954415	-0.671741	-0.0657715	-2.63531
	2.53903	13.7683	6.9286	38.2523			-0.132811	-0.693995	-0.0848003	-2.63307
	2.55214	13.8536	6.96291	38.5004			-0.134594	-0.713813	-0.123446	-2.60867
	2.54692	13.9568	7.00929	38.7461			-0.106827	-0.712125	-0.149839	-2.58161
	2.54575	14.0615	7.06221	38.9673			-0.0828645	-0.696763	-0.145111	-2.57952
	2.57497	14.1493	7.12222	39.1375			-0.0911234	-0.695617	-0.125585	-2.59362
	2.63286	14.2282	7.17363	39.2751			-0.123741	-0.719895	-0.114239	-2.6008
	2.68958	14.3192	7.19564	39.4382			-0.140502	-0.744682	-0.118524	-2.60269
	2.70705	14.4146	7.20905	39.6376			-0.116658	-0.74242	-0.132681	-2.60033
	2.67681	14.4933	7.2441	39.836			-0.0789829	-0.712653	-0.140561	-2.57952
	2.64971	14.5557	7.27995	40.0185			-0.0727485	-0.679901	-0.134929	-2.53983
	2.678	14.6214	7.28657	40.1873			-0.106766	-0.668728	-0.128773	-2.50708
	2.74472	14.697	7.2767	40.3472			-0.144052	-0.685851	-0.146161	-2.49645
	2.78878	14.78	7.26216	40.5312			-0.147086	-0.712515	-0.181904	-2.49991
	2.7832	14.8647	7.23748	40.7748			-0.112505	-0.725019	-0.198702	-2.52321
	2.74917	14.939	7.22088	41.042			-0.0731192	-0.721306	-0.176586	-2.57419
	2.72921	15.0054	7.23163	41.266			-0.0649093	-0.721725	-0.134089	-2.62283
	2.75354	15.0863	7.25199	41.4385			-0.0948823	-0.733396	-0.0978603	-2.64153
	2.79719	15.1836	7.27383	41.5774			-0.131344	-0.73901	-0.0788245	-2.64519
	2.80252	15.2701	7.32169	41.6958			-0.137955	-0.723095	-0.0792876	-2.64397
	2.7609	15.3353	7.39393	41.8355			-0.114544	-0.684989	-0.0869403	-2.63094
	2.73235	15.3959	7.45791	42.0339			-0.0916379	-0.645653	-0.0848923	-2.62521
	2.76424	15.4705	7.50729	42.2603			-0.0906061	-0.634436	-0.0802654	-2.64092
	2.8377	15.5655	7.54699	42.4605			-0.105062	-0.655302	-0.0917534	-2.65579
	2.89824	15.6712	7.56201	42.6302			-0.112932	-0.678048	-0.112376	-2.66959
	2.9077	15.7673	7.56034	42.7866			-0.0974682	-0.679866	-0.124924	-2.71255
	2.87841	15.8458	7.56764	42.9412			-0.0683793	-0.667306	-0.131748	-2.77669
	2.8635	15.925	7.57461	43.1297			-0.0542869	-0.664271	-0.131481	-2.82725
	2.89278	16.0234	7.56938	43.3692			-0.065584	-0.68204	-0.121465	-2.86174
	2.93374	16.1325	7.57773	43.6049			-0.0761976	-0.705347	-0.119794	-2.87668
	2.93232	16.2251	7.61823	43.7888			-0.0656371	-0.704213	-0.134527	-2.84806
	2.8842	16.2792	7.66768	43.9444			-0.0506652	-0.677045	-0.14227	-2.79094
	2.83728	16.3018	7.70488	44.0959			-0.059672	-0.654443	-0.131968	-2.75596
	2.83837	16.3267	7.73079	44.2457			-0.0961291	-0.659877	-0.125214	-2.74785
	2.88702	16.3924	7.74043	44.4274			-0.130236	-0.686219	-0.126889	-2.74011
	2.93884	16.4987	7.74371	44.6491			-0.122543	-0.706909	-0.124972	-2.74614
	2.94603	16.6075	7.76904	44.8512			-0.0743309	-0.701161	-0.120777	-2.77436
	2.91069	16.6894	7.81646	45.0116			-0.0356786	-0.683884	-0.113734	-2.79845
	2.88555	16.7495	7.85318	45.1859			-0.0477582	-0.68878	-0.100494	-2.82155
	2.90937	16.81	7.8696	45.3917			-0.0940548	-0.726525	-0.101235	-2.85634
	2.95447	16.8931	7.8865	45.5991			-0.130677	-0.765965	-0.128742	-2.86734
	2.96304	16.9967	7.9106	45.7994			-0.127769	-0.77068	-0.151427	-2.83648
	2.91759	17.0911	7.93631	45.9875			-0.090476	-0.741011	-0.142646	-2.80928
	2.8592	17.1549	7.97062	46.1193			-0.055303	-0.709684	-0.12239	-2.80943
	2.83969	17.2044	8.00986	46.2298			-0.0558226	-0.704907	-0.113512	-2.82046
	2.86846	17.2682	8.03837	46.392			-0.0818157	-0.728746	-0.11662	-2.84896
	2.90434	17.3526	8.07162	46.6021			-0.0962458	-0.757959	-0.130553	-2.89761
	2.90521	17.4412	8.13676	46.8115			-0.0830452	-0.768771	-0.144365	-2.9304
	2.87907	17.5163	8.21975	47.0221			-0.059486	-0.770101	-0.140909	-2.9264
	2.87538	17.5761	8.28658	47.227			-0.05218	-0.786934	-0.135925	-2.902
	2.92626	17.6354	8.334	47.3824			-0.0701092	-0.821361	-0.15228	-2.86102
	3.00526	17.7103	8.37727	47.4905			-0.089298	-0.845375	-0.175468	-2.8043
	3.06426	17.7983	8.41869	47.6034			-0.0742258	-0.835526	-0.172005	-2.76836
	3.07952	17.8769	8.46363	47.7336			-0.0298883	-0.790369	-0.147387	-2.77948
	3.06394	17.9372	8.51632	47.8658			-0.00893647	-0.736693	-0.125526	-2.81338
	3.05518	18.0058	8.55101	47.9389			-0.0416549	-0.708838	-0.115917	-2.84799
	3.07608	18.0992	8.55459	48.1127			-0.0961547	-0.711663	-0.125603	-2.88616
	3.09628	18.1938	8.55649	48.2805			-0.122449	-0.721912	-0.154065	-2.90937
	3.08008	18.2633	8.57703	48.4536			-0.11129	-0.725273	-0.176891	-2.89125
	3.04532	18.3132	8.59799	48.6767			-0.0957545	-0.724922	-0.173933	-2.84602
	3.036	18.3613	8.61217	48.9273			-0.10401	-0.735267	-0.158717	-2.79379
	3.06176	18.4263	8.63594	49.1558			-0.130483	-0.75812	-0.15015	-2.73104
	3.10231	18.5163	8.6614	49.3599			-0.139491	-0.769198	-0.150592	-2.66728
	3.12694	18.6163	8.67698	49.543			-0.110613	-0.740741	-0.154359	-2.62891
	3.11668	18.6946	8.69513	49.6975			-0.066239	-0.685652	-0.158731	-2.6171
	3.09444	18.7528	8.70538	49.8476			-0.0474795	-0.648318	-0.157898	-2.61803
	3.10798	18.8258	8.6829	50.0201			-0.0605124	-0.658525	-0.154269	-2.63033
	3.15799	18.9239	8.64788	50.1791			-0.0724758	-0.705429	-0.160153	-2.6412
	3.19548	19.0214	8.6389	50.2864			-0.0542841	-0.752152	-0.170384	-2.62301
	3.19353	19.0977	8.65547	50.3719			-0.0162194	-0.76562	-0.162199	-2.57545
	3.17311	19.1473	8.68932	50.4684			0.00979549	-0.748982	-0.128257	-2.53032
	3.16753	19.1738	8.74631	50.5785			0.00244257	-0.736929	-0.0954883	-2.49896
	3.19283	19.2104	8.80494	50.7107			-0.0294513	-0.745593	-0.0887407	-2.46515
	3.23175	19.2911	8.83553	50.8654			-0.0499551	-0.752931	-0.104022	-2.43605
	3.23502	19.3987	8.85504	51.0019			-0.032807	-0.733845	-0.129889	-2.43305
	3.18212	19.4951	8.88092	51.1046			0.00436821	-0.70121	-0.159823	-2.44923
	3.12636	19.5701	8.89016	51.2092			0.016261	-0.690412	-0.180415	-2.4784
	3.12981	19.6263	8.88155	51.332			-0.0168686	-0.721778	-0.184795	-2.52439
	3.18468	19.6747	8.88819	51.4508			-0.0669735	-0.780564	-0.190354	-2.55519
	3.2386	19.7387	8.91665	51.574			-0.0903068	-0.826151	-0.203108	-2.53642
	3.25414	19.8167	8.95047	51.7081			-0.0676226	-0.82654	-0.206699	-2.49644
	3.23504	19.8798	8.99074	51.8172			-0.0201261	-0.797065	-0.199572	-2.46918
	3.21976	19.9286	9.02913	51.8942			0.0116213	-0.776144	-0.19609	-2.45298
	3.24588	19.9948	9.03999	51.9886			0.0131077	-0.780719	-0.198241	-2.46129
	3.29445	20.0914	9.03943	52.1157			0.010286	-0.794278	-0.202342	-2.50812
	3.31238	20.1932	9.06068	52.2453			0.0255866	-0.791371	-0.2125	-2.55139
	3.2831	20.2705	9.08523	52.3742			0.0414965	-0.764043	-0.218219	-2.54648
	3.24121	20.3213	9.08577	52.5065			0.0300704	-0.737733	-0.211735	-2.51402
	3.2241	20.358	9.0748	52.6226			-0.00907113	-0.74186	-0.2103	-2.48899
	3.23858	20.4146	9.06998	52.7441			-0.0455771	-0.773474	-0.223714	-2.47494
	3.2628	20.5043	9.07484	52.918			-0.0490481	-0.79989	-0.231845	-2.47782
	3.27129	20.603	9.10414	53.1069			-0.0180803	-0.800442	-0.222394	-2.49925
	3.26177	20.6884	9.16034	53.2373			0.00792933	-0.783666	-0.208095	-2.51069
	3.26115	20.7662	9.20772	53.2732			-0.00909888	-0.777099	-0.193834	-2.50647
	3.29293	20.8433	9.22303	53.357			-0.063605	-0.795217	-0.182109	-2.5303
	3.34022	20.9147	9.22667	53.436			-0.119382	-0.818865	-0.18671	-2.5824
	3.36192	20.9813	9.23299	53.5337			-0.148208	-0.821351	-0.199866	-2.6124
	3.34826	21.0415	9.23302	53.6871			-0.148066	-0.804339	-0.198104	-2.61999
	3.32505	21.0917	9.23115	53.8464			-0.138904	-0.79379	-0.186039	-2.63103
	3.3144	21.1411	9.24205	53.9471			-0.143088	-0.806047	-0.180846	-2.63193
	3.31674	21.1963	9.26315	54.02			-0.158531	-0.829829	-0.17913	-2.61973
	3.31742	21.2463	9.2878	54.1093			-0.160157	-0.837639	-0.179499	-2.62604
	3.30344	21.2913	9.32168	54.2197			-0.139337	-0.816493	-0.188398	-2.64602
	3.2878	21.3525	9.35498	54.3692			-0.115253	-0.781023	-0.19221	-2.65555
	3.30406	21.4452	9.36704	54.5685			-0.104648	-0.763742	-0.18023	-2.66527
	3.35517	21.5639	9.36825	54.7594			-0.104879	-0.776135	-0.176971	-2.67541
	3.40608	21.6857	9.38559	54.8928			-0.111216	-0.793869	-0.196995	-2.66048
	3.42817	21.7859	9.41879	55.0089			-0.117981	-0.790339	-0.21675	-2.62647
	3.42649	21.8496	9.46134	55.1416			-0.118	-0.770791	-0.221727	-2.60458
	3.42212	21.8831	9.52017	55.2717			-0.117964	-0.760428	-0.219746	-2.59259
	3.43432	21.9126	9.59078	55.3978			-0.12336	-0.773883	-0.215002	-2.57681
	3.46822	21.963	9.64918	55.5263			-0.120207	-0.798977	-0.211808	-2.57877
	3.50888	22.0278	9.68863	55.6199			-0.0960866	-0.813779	-0.223373	-2.61298
	3.52806	22.0895	9.71569	55.6712			-0.0691412	-0.808948	-0.241211	-2.65811
	3.51977	22.1503	9.71812	55.7474			-0.0572643	-0.803259	-0.242029	-2.69534
	3.50399	22.2234	9.70031	55.8828			-0.0593561	-0.815241	-0.229803	-2.72276
	3.49808	22.3119	9.7063	56.0446			-0.063165	-0.840977	-0.228074	-2.72748
	3.50723	22.4145	9.75857	56.2089			-0.05438	-0.857827	-0.233862	-2.708
	3.52759	22.5182	9.83533	56.3599			-0.0262365	-0.845232	-0.225086	-2.69548
	3.53178	22.5997	9.91588	56.4475			0.00258866	-0.809813	-0.199658	-2.70252
	3.4942	22.6571	9.98538	56.4573			0.00137679	-0.784007	-0.171337	-2.70605
	3.43895	22.7185	10.0111	56.4508			-0.0352545	-0.789654	-0.15207	-2.69618
	3.41046	22.8034	9.99211	56.4732			-0.077036	-0.818881	-0.150333	-2.68758
	3.41323	22.8927	9.97703	56.5277			-0.0976659	-0.847954	-0.167541	-2.68493
	3.42438	22.9591	9.98439	56.6199			-0.101065	-0.856703	-0.185366	-2.68544
	3.43079	23.0052	9.99335	56.7467			-0.103148	-0.843142	-0.186649	-2.69458
	3.4306	23.0476	10.0043	56.8773			-0.108679	-0.822581	-0.184098	-2.7085
	3.4365	23.0953	10.0239	57.0111			-0.113992	-0.809037	-0.196755	-2.70797
	3.46667	23.156	10.0404	57.1916			-0.115068	-0.796427	-0.223033	-2.69398
	3.51165	23.2251	10.0607	57.401			-0.11385	-0.776103	-0.247907	-2.689
	3.53684	23.283	10.101	57.5527			-0.118475	-0.757923	-0.265834	-2.69416
	3.53776	23.334	10.1376	57.6524			-0.134053	-0.763198	-0.277461	-2.69317
	3.54377	23.4012	10.1466	57.7017			-0.147356	-0.800085	-0.282115	-2.69912
	3.5682	23.4809	10.1595	57.7347			-0.138073	-0.852357	-0.287465	-2.72112
	3.58929	23.5584	10.2024	57.7948			-0.106136	-0.885942	-0.29365	-2.72715
	3.59023	23.6298	10.2465	57.929			-0.0724496	-0.88001	-0.281665	-2.69464
	3.57126	23.6871	10.2698	58.1113			-0.0572279	-0.845154	-0.24636	-2.63596
	3.54353	23.7252	10.279	58.2745			-0.0608223	-0.818203	-0.215669	-2.55867
	3.52956	23.7618	10.273	58.4122			-0.071768	-0.817979	-0.206136	-2.47856
	3.54462	23.8068	10.2617	58.5455			-0.0759234	-0.825987	-0.210561	-2.44098
	3.56723	23.8536	10.2727	58.6652			-0.0730168	-0.816839	-0.225483	-2.45395
	3.56841	23.9041	10.3017	58.7897			-0.078923	-0.794675	-0.245677	-2.47739
	3.5554	23.9696	10.3153	58.9593			-0.104637	-0.785623	-0.255727	-2.50189
	3.55347	24.055	10.3202	59.1364			-0.131222	-0.81112	-0.257492	-2.54458
	3.57097	24.1546	10.3442	59.2536			-0.139714	-0.86067	-0.267813	-2.59266
	3.60011	24.2497	10.3736	59.3268			-0.135696	-0.897526	-0.279121	-2.62713
	3.61872	24.3156	10.3898	59.3975			-0.13391	-0.894972	-0.278173	-2.65748
	3.60886	24.347	10.4034	59.4629			-0.13719	-0.86162	-0.274917	-2.67649
	3.58301	24.3775	10.4128	59.5375			-0.138496	-0.828446	-0.275543	-2.65867
	3.57309	24.4382	10.4068	59.6436			-0.126374	-0.814327	-0.274166	-2.62453
	3.59022	24.5133	10.4004	59.7367			-0.102018	-0.809299	-0.27512	-2.6072
	3.61413	24.5689	10.4108	59.7927			-0.0921086	-0.79223	-0.28156	-2.58399
	3.62249	24.6016	10.421	59.883			-0.114661	-0.767219	-0.277322	-2.52913
	3.61534	24.6334	10.4182	60.0433			-0.14735	-0.763315	-0.262404	-2.46598
	3.61337	24.6893	10.4226	60.2213			-0.159078	-0.79406	-0.259492	-2.4069
	3.63488	24.7829	10.4435	60.3777			-0.147009	-0.839446	-0.268354	-2.34965
	3.68322	24.891	10.4677	60.5004			-0.135125	-0.867146	-0.269942	-2.32338
	3.73579	24.9733	10.4919	60.5503			-0.148333	-0.860145	-0.265868	-2.33228
	3.75963	25.0267	10.5124	60.5348			-0.18614	-0.834082	-0.261389	-2.32641
	3.75082	25.078	10.5126	60.5462			-0.21764	-0.816913	-0.248878	-2.29384
	3.73858	25.1381	10.5003	60.6173			-0.215189	-0.817447	-0.238364	-2.27364
	3.74343	25.2004	10.5117	60.7008			-0.194371	-0.821626	-0.244095	-2.27543
	3.76038	25.2534	10.5518	60.7832			-0.194214	-0.817274	-0.250607	-2.28662
	3.77347	25.2929	10.5847	60.8753			-0.222954	-0.80878	-0.243034	-2.31392
	3.76824	25.3317	10.5958	60.9519			-0.247802	-0.812864	-0.238475	-2.3431
	3.74129	25.392	10.6007	61.0103			-0.243854	-0.832735	-0.245831	-2.34219
	3.71442	25.4789	10.6133	61.1038			-0.213892	-0.854368	-0.253723	-2.31848
	3.70916	25.5667	10.6483	61.2303			-0.183337	-0.860652	-0.263638	-2.30379
	3.71961	25.623	10.7114	61.3322			-0.18223	-0.852086	-0.278369	-2.29473
	3.72509	25.6565	10.7716	61.4025			-0.214331	-0.841966	-0.283794	-2.2769
	3.72447	25.6982	10.7915	61.4608			-0.244075	-0.843298	-0.276052	-2.26704
	3.73566	25.7375	10.7821	61.4988			-0.240877	-0.85664	-0.269606	-2.2717
	3.76877	25.821	10.7791	61.538			-0.214041	-0.868357	-0.265862	-2.27366
	3.81537	25.8978	10.7831	61.6361			-0.189958	-0.867327	-0.253476	-2.27612
	3.84713	25.9673	10.7885	61.7789			-0.177232	-0.859192	-0.237221	-2.29554
	3.83047	26.0331	10.813	61.9009			-0.167931	-0.858474	-0.234716	-2.32093
	3.77417	26.111	10.8561	61.9902			-0.144211	-0.869266	-0.250714	-2.33738
	3.73529	26.1981	10.8973	62.0714			-0.0988287	-0.877473	-0.273951	-2.35072
	3.74595	26.2587	10.9344	62.1383			-0.0564778	-0.870893	-0.302201	-2.35238
	3.78166	26.2792	10.9619	62.1956			-0.0582085	-0.855286	-0.324308	-2.32167
	3.80853	26.296	10.9522	62.2788			-0.106323	-0.841834	-0.32979	-2.26761
	3.81023	26.3507	10.9117	62.3717			-0.151996	-0.836911	-0.324287	-2.21817
	3.78906	26.4427	10.8858	62.4273			-0.148916	-0.83945	-0.32348	-2.18158
	3.7787	26.5396	10.8866	62.4545			-0.107098	-0.838912	-0.32806	-2.1555
	3.80671	26.6141	10.8947	62.4925			-0.0743366	-0.829021	-0.328404	-2.14866
	3.85306	26.6576	10.9093	62.557			-0.0816546	-0.823302	-0.328188	-2.15651
	3.88363	26.6944	10.925	62.6599			-0.117377	-0.831641	-0.329772	-2.15768
	3.90156	26.7576	10.9261	62.8068			-0.145029	-0.844997	-0.324748	-2.15131
	3.92063	26.8343	10.9328	62.9343			-0.14743	-0.846331	-0.311096	-2.1589
	3.93737	26.8762	10.9735	62.9784			-0.141931	-0.832498	-0.301737	-2.17585
	3.94197	26.8771	11.019	62.9772			-0.15627	-0.812525	-0.299671	-2.18573
	3.92912	26.8761	11.0276	62.9915			-0.18582	-0.804795	-0.296323	-2.20665
	3.89981	26.906	11.0121	63.0223			-0.198298	-0.818971	-0.295954	-2.25208
	3.87305	26.9768	11.0082	63.0669			-0.176619	-0.844391	-0.305186	-2.30342
	3.87595	27.0703	11.0266	63.1498			-0.145621	-0.860714	-0.315014	-2.35953
	3.9046	27.1435	11.0693	63.259			-0.139988	-0.858671	-0.320242	-2.42617
	3.91624	27.1821	11.1208	63.3579			-0.166851	-0.847942	-0.333091	-2.47177
	3.88747	27.2209	11.1353	63.4559			-0.1977	-0.849734	-0.344921	-2.47314
	3.84115	27.2921	11.1031	63.5649			-0.19454	-0.870611	-0.342219	-2.45834
	3.81741	27.3873	11.07	63.662			-0.14928	-0.893964	-0.3371	-2.4419
	3.84126	27.4765	11.0604	63.7508			-0.102321	-0.897315	-0.339524	-2.40891
	3.90235	27.5351	11.058	63.848			-0.0936745	-0.875861	-0.341858	-2.37663
	3.94981	27.5691	11.0578	63.9201			-0.109414	-0.851185	-0.34627	-2.3654
	3.94278	27.61	11.0658	63.9564			-0.105572	-0.846639	-0.361478	-2.35211
	3.90191	27.6755	11.0712	64.0293			-0.0682769	-0.862082	-0.37365	-2.32188
	3.87717	27.7518	11.0797	64.1645			-0.0250391	-0.878501	-0.375266	-2.30366
	3.89134	27.8081	11.1123	64.2993			-0.0205227	-0.880565	-0.382468	-2.30795
	3.92229	27.8474	11.1481	64.4087			-0.0669619	-0.872307	-0.391871	-2.31778
	3.93277	27.8924	11.1515	64.5138			-0.124122	-0.871057	-0.387646	-2.34033
	3.91321	27.9538	11.1369	64.5912			-0.142224	-0.879216	-0.376302	-2.3688
	3.89631	27.9648	11.1418	64.6336			-0.118417	-0.879857	-0.366878	-2.35589
	3.91354	28.0438	11.1705	64.6976			-0.0937198	-0.866703	-0.34857	-2.30123
	3.95492	28.0965	11.2121	64.7815			-0.103196	-0.85721	-0.323173	-2.2648
	3.97562	28.1271	11.2625	64.8307			-0.143035	-0.86498	-0.305459	-2.26775
	3.94964	28.1662	11.3044	64.8558			-0.17086	-0.887982	-0.286302	-2.28517
	3.9137	28.2184	11.3252	64.8902			-0.151108	-0.909514	-0.255455	-2.30855
	3.92917	28.2567	11.3473	64.9152			-0.0983073	-0.908899	-0.232453	-2.31975
	4.00124	28.2738	11.3862	64.9363			-0.0706024	-0.886137	-0.224794	-2.29355
	4.07875	28.2979	11.4178	65.0155			-0.102069	-0.868333	-0.214165	-2.25778
	4.10815	28.3624	11.4297	65.1401			-0.163381	-0.870489	-0.201787	-2.25924
	4.07908	28.4676	11.4393	65.2364			-0.201203	-0.881967	-0.201522	-2.28306
	4.03392	28.5703	11.4487	65.2986			-0.200098	-0.886109	-0.208122	-2.30334
	4.02558	28.6219	11.446	65.3536			-0.185372	-0.879903	-0.223364	-2.33635
	4.0506	28.6282	11.4391	65.3954			-0.188781	-0.876374	-0.25928	-2.38461
	4.05913	28.6452	11.4391	65.4374			-0.211934	-0.886346	-0.298834	-2.41945
	4.03024	28.7191	11.432	65.5155			-0.218597	-0.901347	-0.313627	-2.43099
	3.9948	28.8335	11.42	65.5929			-0.179088	-0.901923	-0.311511	-2.43175
	3.9951	28.9311	11.4244	65.6124			-0.125596	-0.880392	-0.312571	-2.41727
	4.04105	28.9847	11.4369	65.6126			-0.11037	-0.847867	-0.315369	-2.3864
	4.09704	29.0177	11.4336	65.6606			-0.141222	-0.822156	-0.313873	-2.36256
	4.11133	29.0583	11.4176	65.7566			-0.178493	-0.817195	-0.30961	-2.34979
	4.07585	29.1212	11.4044	65.8854			-0.18535	-0.829803	-0.295997	-2.33403
	4.04664	29.2031	11.3894	66.0393			-0.167139	-0.842781	-0.267331	-2.33412
	4.07935	29.2695	11.376	66.1651			-0.170295	-0.844076	-0.235419	-2.37361
	4.15142	29.293	11.3742	66.2246			-0.228661	-0.838208	-0.214797	-2.43303
	4.19877	29.3032	11.3541	66.2681			-0.313995	-0.839313	-0.204523	-2.48392
	4.19221	29.3429	11.2891	66.3429			-0.358277	-0.852204	-0.20095	-2.52214
	4.15162	29.4041	11.216	66.4218			-0.325532	-0.871376	-0.21323	-2.53749
	4.1195	29.457	11.1813	66.4781			-0.25469	-0.887775	-0.238543	-2.51571
	4.12986	29.4911	11.1914	66.5289			-0.214367	-0.897376	-0.260955	-2.4702
	4.15587	29.5093	11.2393	66.563			-0.227252	-0.906155	-0.274155	-2.42864
	4.13968	29.5227	11.3088	66.5686			-0.253625	-0.928037	-0.282398	-2.40117
	4.08283	29.5545	11.362	66.5913			-0.248361	-0.953396	-0.286928	-2.39428
	4.04352	29.608	11.3864	66.6565			-0.20168	-0.958624	-0.287229	-2.42589
	4.05487	29.6533	11.4102	66.7286			-0.149306	-0.937797	-0.293302	-2.49124
	4.10449	29.6774	11.4344	66.7894			-0.137758	-0.902739	-0.305531	-2.54688
	4.15736	29.7055	11.4274	66.8574			-0.169153	-0.865025	-0.302746	-2.56653
	4.17842	29.7506	11.3996	66.9192			-0.199529	-0.835441	-0.275577	-2.55472
	4.16783	29.8024	11.3846	66.9669			-0.198153	-0.820456	-0.243526	-2.50847
	4.16572	29.8542	11.3812	67.0424			-0.176222	-0.819639	-0.227132	-2.43786
	4.19244	29.8982	11.3791	67.1445			-0.162531	-0.835701	-0.228198	-2.3904
	4.21604	29.9266	11.3828	67.2113			-0.163682	-0.872164	-0.243724	-2.38437
	4.19936	29.9622	11.3821	67.2329			-0.160598	-0.915274	-0.26189	-2.3909
	4.15567	30.0156	11.3672	67.2536			-0.135238	-0.942299	-0.267195	-2.40155
	4.13229	30.0966	11.3705	67.2836			-0.101028	-0.941218	-0.270741	-2.41703
	4.1526	30.1568	11.4177	67.3242			-0.0948371	-0.918775	-0.295608	-2.41356
	4.19882	30.2067	11.4763	67.4019			-0.141813	-0.896777	-0.329411	-2.39273
	4.22391	30.2601	11.5191	67.4896			-0.219388	-0.891186	-0.344229	-2.39393
	4.19588	30.3232	11.5571	67.5222			-0.273234	-0.897743	-0.341034	-2.41575
	4.14398	30.393	11.5928	67.5209			-0.273365	-0.902258	-0.325854	-2.42787
	4.13269	30.4437	11.6224	67.553			-0.238274	-0.897676	-0.303619	-2.4406
	4.17615	30.4548	11.6574	67.6101			-0.203647	-0.889633	-0.291416	-2.46128
	4.22434	30.4447	11.694	67.6629			-0.187803	-0.887519	-0.294757	-2.45887
	4.22728	30.4516	11.7041	67.7228			-0.181998	-0.891565	-0.290571	-2.431
	4.18361	30.497	11.6956	67.7644			-0.161372	-0.89408	-0.268797	-2.4146
	4.14031	30.5693	11.708	67.7498			-0.12534	-0.883644	-0.249743	-2.41462
	4.14993	30.6324	11.744	67.7318			-0.0962766	-0.859882	-0.239669	-2.41061
	4.20736	30.6582	11.7764	67.7726			-0.0842809	-0.836707	-0.230993	-2.41093
	4.25567	30.6598	11.7994	67.8413			-0.0797632	-0.827989	-0.228084	-2.40397
	4.25089	30.6805	11.8221	67.9008			-0.0735318	-0.831609	-0.229696	-2.35296
	4.20822	30.7384	11.8498	67.9657			-0.0617788	-0.839699	-0.226281	-2.2807
	4.17674	30.809	11.8931	68.0113			-0.0553632	-0.847376	-0.229495	-2.24666
	4.18029	30.8645	11.9538	68.0108			-0.0785848	-0.852827	-0.25305	-2.25347
	4.19142	30.906	11.9986	68.0283			-0.139231	-0.863769	-0.275165	-2.27446
	4.17649	30.9455	11.9973	68.1139			-0.205929	-0.893171	-0.273403	-2.30623
	4.13881	30.9917	11.9739	68.2206			-0.235367	-0.934314	-0.260545	-2.32892
	4.1153	31.0448	11.9663	68.2976			-0.2121	-0.962096	-0.249382	-2.31558
	4.14159	31.0987	11.973	68.3481			-0.157366	-0.960601	-0.238342	-2.28244
	4.20101	31.1473	11.9851	68.3599			-0.107463	-0.937386	-0.238025	-2.24891
	4.22918	31.1964	12.0016	68.3363			-0.0888319	-0.914911	-0.246338	-2.1987
	4.19655	31.2524	12.0112	68.3512			-0.0910604	-0.904864	-0.235377	-2.13549
	4.14999	31.3085	12.0146	68.4316			-0.086348	-0.894396	-0.203263	-2.09939
	4.14902	31.3474	12.0412	68.5089			-0.0742426	-0.874557	-0.179211	-2.10304
	4.19861	31.3648	12.0993	68.5443			-0.0902271	-0.857503	-0.170602	-2.12834
	4.25012	31.3826	12.1432	68.5672			-0.150757	-0.860107	-0.161199	-2.17098
	4.25541	31.4186	12.1396	68.5841			-0.229937	-0.880904	-0.148401	-2.21926
	4.21946	31.4631	12.1058	68.5997			-0.291334	-0.901124	-0.140543	-2.23536
	4.19998	31.5065	12.0741	68.6668			-0.309925	-0.903721	-0.142601	-2.19865
	4.23276	31.5507	12.0743	68.7896			-0.287169	-0.889791	-0.164404	-2.13006
	4.27933	31.5895	12.1221	68.8937			-0.25342	-0.878468	-0.211422	-2.05167
	4.26954	31.6325	12.1879	68.9439			-0.239122	-0.880164	-0.260992	-1.983
	4.19682	31.6911	12.2196	68.9802			-0.241843	-0.886346	-0.285193	-1.95964
	4.12328	31.7524	12.215	69.022			-0.241176	-0.884192	-0.282202	-1.99408
	4.10257	31.7858	12.2138	69.0728			-0.229865	-0.874629	-0.268106	-2.04689
	4.13589	31.7992	12.2214	69.1556			-0.222108	-0.867131	-0.250548	-2.08358
	4.18255	31.7662	12.2232	69.2538			-0.231132	-0.868738	-0.228031	-2.10174
	4.18895	31.8154	12.2284	69.3155			-0.252854	-0.875935	-0.207267	-2.09594
	4.15001	31.8079	12.2339	69.3432			-0.263798	-0.882381	-0.191494	-2.05749
	4.12416	31.868	12.2186	69.389			-0.243231	-0.882261	-0.181118	-2.00584
	4.14553	31.9429	12.1986	69.4543			-0.193518	-0.877287	-0.18641	-1.96519
	4.1775	32.01	12.1979	69.5145			-0.149048	-0.878639	-0.208684	-1.9319
	4.18121	32.072	12.1988	69.584			-0.142698	-0.890833	-0.226388	-1.89615
	4.15809	32.132	12.1906	69.6531			-0.16572	-0.904587	-0.220833	-1.87022
	4.13382	32.1665	12.1988	69.683			-0.178608	-0.913161	-0.208791	-1.86056
	4.13978	32.1742	12.219	69.6944			-0.170792	-0.914272	-0.21383	-1.85723
	4.18076	32.1848	12.2161	69.7401			-0.166728	-0.909487	-0.234449	-1.87049
	4.21378	32.2133	12.1941	69.812			-0.191401	-0.908266	-0.258542	-1.9107
	4.19972	32.258	12.1771	69.884			-0.242884	-0.9166	-0.277538	-1.95358
	4.16312	32.3202	12.1654	69.9686			-0.293532	-0.922136	-0.283829	-1.99012
	4.15795	32.3824	12.1707	70.0424			-0.311066	-0.910547	-0.282715	-2.04655
	4.20254	32.4209	12.2156	70.0627			-0.289681	-0.887533	-0.29586	-2.11191
	4.26386	32.4463	12.2768	70.0727			-0.252304	-0.870171	-0.31753	-2.14762
	4.29705	32.4792	12.3123	70.1503			-0.220618	-0.86784	-0.318031	-2.15938
	4.28289	32.517	12.3272	70.2866			-0.196706	-0.873191	-0.293615	-2.16224
	4.2426	32.5546	12.3487	70.43			-0.174391	-0.873219	-0.269942	-2.14113
	4.21994	32.5951	12.378	70.5551			-0.155474	-0.866168	-0.259568	-2.10731
	4.22749	32.6361	12.4195	70.619			-0.144065	-0.864056	-0.262638	-2.09508
	4.23011	32.6803	12.4779	70.5978			-0.150223	-0.875277	-0.277238	-2.09205
	4.2126	32.7397	12.519	70.5736			-0.179616	-0.895459	-0.278612	-2.07337
	4.20906	32.8105	12.5232	70.6278			-0.214206	-0.90796	-0.255326	-2.06722
	4.24478	32.8775	12.5305	70.7242			-0.223283	-0.903001	-0.239992	-2.09515
	4.29604	32.9388	12.572	70.8143			-0.206858	-0.889764	-0.260583	-2.13623
	4.31983	32.9948	12.6278	70.9127			-0.196357	-0.882464	-0.303036	-2.17866
	4.29116	33.041	12.6751	71.0034			-0.215014	-0.885324	-0.341343	-2.22015
	4.23449	33.0785	12.7072	71.0634			-0.256781	-0.889932	-0.360356	-2.2244
	4.20994	33.1194	12.7073	71.1446			-0.292062	-0.886636	-0.351419	-2.17535
	4.24906	33.1665	12.6743	71.2732			-0.291211	-0.879333	-0.331556	-2.12212
	4.31698	33.2153	12.6364	71.3926			-0.263099	-0.878678	-0.332432	-2.09519
	4.34728	33.2621	12.6011	71.4733			-0.241853	-0.887861	-0.34796	-2.07883
	4.31345	33.301	12.5464	71.5407			-0.242255	-0.90095	-0.345026	-2.08137
	4.25533	33.3237	12.4784	71.5846			-0.247705	-0.909942	-0.323943	-2.11573
	4.23583	33.3412	12.4327	71.6076			-0.245568	-0.908242	-0.312565	-2.14971
	4.27374	33.3747	12.4215	71.6783			-0.235897	-0.902659	-0.32318	-2.16328
	4.3315	33.4259	12.4347	71.8135			-0.227617	-0.906019	-0.350234	-2.17042
	4.35464	33.4717	12.468	71.943			-0.234959	-0.915832	-0.373731	-2.15643
	4.33386	33.4892	12.5075	72.0341			-0.268286	-0.912508	-0.361651	-2.10102
	4.32317	33.4764	12.5292	72.1083			-0.30866	-0.8871	-0.314032	-2.04233
	4.36795	33.4329	12.5456	72.1474			-0.317137	-0.852244	-0.283553	-2.03011
	4.43753	33.4705	12.5863	72.1298			-0.279948	-0.833402	-0.298556	-2.07048
	4.47133	33.5429	12.64	72.1034			-0.220739	-0.846005	-0.323766	-2.15265
	4.44744	33.6165	12.6787	72.0913			-0.177802	-0.875588	-0.324921	-2.25702
	4.39841	33.6511	12.7036	72.0618			-0.177627	-0.897177	-0.305659	-2.32878
	4.37813	33.6527	12.7231	72.0286			-0.211202	-0.89966	-0.282986	-2.32805
	4.40626	33.6648	12.7361	72.0439			-0.235104	-0.890953	-0.274521	-2.27725
	4.43543	33.705	12.7506	72.0942			-0.225763	-0.887723	-0.289808	-2.21848
	4.41023	33.7511	12.7737	72.1497			-0.210256	-0.897494	-0.309286	-2.16456
	4.34597	33.7887	12.7811	72.2257			-0.219505	-0.909295	-0.302252	-2.12512
	4.31203	33.8173	12.7594	72.3044			-0.24128	-0.912088	-0.270811	-2.11794
	4.34275	33.8354	12.734	72.3405			-0.246815	-0.908234	-0.247905	-2.13612
	4.40424	33.8578	12.7127	72.3579			-0.225572	-0.90433	-0.251532	-2.15875
	4.43972	33.9034	12.6781	72.4176			-0.193146	-0.901343	-0.270005	-2.18406
	4.42693	33.9536	12.646	72.5148			-0.168327	-0.898326	-0.286429	-2.20295
	4.39152	33.9813	12.65	72.6216			-0.155319	-0.892524	-0.292514	-2.18968
	4.38698	33.9945	12.6743	72.744			-0.143471	-0.883878	-0.291029	-2.14972
	4.43296	34.0148	12.6913	72.859			-0.127584	-0.879483	-0.295465	-2.12235
	4.47827	34.0415	12.7104	72.9276			-0.119916	-0.890531	-0.32172	-2.12576
	4.46968	34.073	12.7275	72.9806			-0.144912	-0.917997	-0.356318	-2.14879
	4.42893	34.11	12.7237	73.0752			-0.201305	-0.948772	-0.365702	-2.18661
	4.41019	34.1417	12.7261	73.194			-0.25189	-0.96528	-0.351504	-2.23177
	4.43197	34.1688	12.7705	73.2944			-0.257434	-0.964145	-0.344372	-2.26147
	4.47488	34.2163	12.8397	73.3858			-0.217719	-0.952865	-0.357385	-2.26891
	4.49318	34.2855	12.9087	73.4682			-0.169819	-0.938999	-0.376356	-2.27581
	4.45941	34.3439	12.9729	73.5329			-0.158006	-0.92859	-0.388491	-2.28586
	4.41424	34.3761	13.0115	73.6214			-0.196857	-0.918065	-0.388882	-2.28321
	4.42157	34.3976	13.0123	73.7559			-0.250627	-0.899501	-0.383162	-2.27908
	4.47814	34.4244	13.0118	73.8773			-0.268694	-0.87743	-0.392576	-2.28285
	4.52471	34.4688	13.037	73.9536			-0.242077	-0.864458	-0.424368	-2.26789
	4.5269	34.5324	13.0622	74.0339			-0.207621	-0.864755	-0.448958	-2.22878
	4.50768	34.5888	13.074	74.1428			-0.197805	-0.871934	-0.445682	-2.19869
	4.5099	34.6144	13.0835	74.2609			-0.205366	-0.877327	-0.439502	-2.18425
	4.54727	34.6285	13.0702	74.3913			-0.198692	-0.880086	-0.45409	-2.17441
	4.58121	34.6611	13.0137	74.5097			-0.163439	-0.889696	-0.483584	-2.19532
	4.56051	34.717	12.9471	74.5496			-0.118764	-0.914347	-0.512448	-2.25188
	4.48391	34.7839	12.9093	74.5265			-0.0982226	-0.946938	-0.519167	-2.30531
	4.42112	34.8452	12.9033	74.5407			-0.113236	-0.969858	-0.488017	-2.34486
	4.43523	34.8969	12.9365	74.6186			-0.137515	-0.969787	-0.445236	-2.38644
	4.50758	34.9536	13.0173	74.7143			-0.141806	-0.947696	-0.436286	-2.41635
	4.56638	35.0302	13.1072	74.82			-0.133979	-0.921959	-0.453141	-2.42345
	4.56086	35.108	13.1678	74.9176			-0.132925	-0.909431	-0.45572	-2.43422
	4.5001	35.1553	13.2049	74.9449			-0.139981	-0.908646	-0.431369	-2.45007
	4.44377	35.1664	13.2239	74.9231			-0.140536	-0.913013	-0.386385	-2.43843
	4.44276	35.169	13.2202	74.9564			-0.122913	-0.921979	-0.338712	-2.40669
	4.48171	35.1946	13.2192	75.0635			-0.0882039	-0.941066	-0.318517	-2.38464
	4.51102	35.2534	13.2433	75.1905			-0.0627349	-0.970556	-0.330225	-2.36097
	4.51077	35.3268	13.2618	75.3195			-0.0716659	-0.998434	-0.338051	-2.32608
	4.50632	35.3884	13.2401	75.4194			-0.110229	-1.00496	-0.328091	-2.30799
	4.53069	35.433	13.1888	75.4522			-0.152457	-0.980237	-0.328507	-2.30705
	4.58008	35.4845	13.1293	75.4769			-0.17593	-0.937114	-0.351291	-2.29736
	4.61035	35.557	13.0726	75.5775			-0.174358	-0.905759	-0.377097	-2.29917
	4.59162	35.6295	13.0433	75.723			-0.166554	-0.904324	-0.392516	-2.33692
	4.5433	35.6729	13.056	75.8424			-0.184476	-0.923205	-0.387197	-2.38587
	4.51706	35.6878	13.0861	75.9334			-0.229706	-0.943397	-0.356243	-2.42748
	4.54363	35.6972	13.114	75.9747			-0.261822	-0.958047	-0.328121	-2.47035
	4.59283	35.7221	13.1541	75.9338			-0.247367	-0.972469	-0.334303	-2.49568
	4.60351	35.7664	13.2081	75.8664			-0.206872	-0.990214	-0.357662	-2.48434
	4.57133	35.8177	13.2478	75.8491			-0.187982	-1.0061	-0.365783	-2.46191
	4.55201	35.8523	13.2631	75.86			-0.215066	-1.00623	-0.363202	-2.45178
	4.58385	35.8708	13.2655	75.856			-0.270159	-0.983071	-0.366065	-2.44881
	4.6477	35.9053	13.251	75.8639			-0.303805	-0.947374	-0.375694	-2.45861
	4.68609	35.9702	13.2259	75.8932			-0.28334	-0.917605	-0.393868	-2.48921
	4.65313	36.0356	13.2111	75.9132			-0.238494	-0.908561	-0.412503	-2.51424
	4.57598	36.0743	13.1988	75.9507			-0.221657	-0.920004	-0.406671	-2.50816
	4.53492	36.0947	13.1673	76.0146			-0.239502	-0.934418	-0.373552	-2.48952
	4.56527	36.1089	13.1366	76.0539			-0.250376	-0.94366	-0.344528	-2.47908
	4.61938	36.126	13.1426	76.0412			-0.225546	-0.955292	-0.340345	-2.46602
	4.63701	36.1574	13.173	76.0273			-0.175503	-0.973809	-0.347575	-2.44205
	4.60798	36.1938	13.1995	76.0318			-0.139064	-0.989549	-0.339787	-2.41717
	4.56871	36.2079	13.224	76.038			-0.144901	-0.987948	-0.313953	-2.38739
	4.56176	36.2111	13.2451	76.0711			-0.181435	-0.957555	-0.288973	-2.34265
	4.58924	36.237	13.2545	76.1462			-0.207228	-0.907332	-0.283058	-2.29682
	4.60237	36.2838	13.27	76.2019			-0.203819	-0.869978	-0.302586	-2.2637
	4.56055	36.3292	13.3004	76.1954			-0.197337	-0.871989	-0.329082	-2.24165
	4.50435	36.3681	13.3176	76.1701			-0.221348	-0.906431	-0.334312	-2.23824
	4.51037	36.3954	13.3133	76.1554			-0.266371	-0.946968	-0.311497	-2.26504
	4.58706	36.4091	13.3137	76.1514			-0.2875	-0.974099	-0.286595	-2.30449
	4.66885	36.4336	13.3146	76.1877			-0.26114	-0.983637	-0.276712	-2.33443
	4.69345	36.4864	13.292	76.2741			-0.210876	-0.983009	-0.27132	-2.36487
	4.64764	36.5394	13.2592	76.35			-0.181505	-0.981003	-0.263345	-2.40812
	4.58358	36.5689	13.2295	76.3783			-0.198687	-0.979473	-0.256013	-2.44131
	4.57643	36.5898	13.1873	76.3922			-0.240754	-0.973268	-0.250944	-2.44491
	4.62456	36.6191	13.1453	76.3949			-0.255906	-0.960171	-0.254605	-2.43237
	4.65326	36.6568	13.093	76.3587			-0.220417	-0.948178	-0.275088	-2.41469
	4.63288	36.7005	13.0988	76.3083			-0.167735	-0.941199	-0.295013	-2.39757
	4.6098	36.7364	13.1038	76.2545			-0.147779	-0.93333	-0.287245	-2.40982
	4.63474	36.7498	13.1075	76.1649			-0.171006	-0.921505	-0.259734	-2.44832
	4.70398	36.7599	13.1127	76.0714			-0.2029	-0.908401	-0.244381	-2.4593
	4.76203	36.796	13.1042	76.0572			-0.19955	-0.901378	-0.251451	-2.42593
	4.74828	36.8515	13.0909	76.1179			-0.154557	-0.908659	-0.267522	-2.38096
	4.66692	36.8961	13.095	76.188			-0.107803	-0.927282	-0.279275	-2.3326
	4.59261	36.9156	13.0993	76.2497			-0.107415	-0.941715	-0.272382	-2.27863
	4.58546	36.9127	13.0892	76.2908			-0.150371	-0.941686	-0.254668	-2.24661
	4.62542	36.9068	13.0961	76.2803			-0.188859	-0.929454	-0.262388	-2.23744
	4.64135	36.9229	13.1396	76.2533			-0.185024	-0.91696	-0.301352	-2.22124
	4.59816	36.9608	13.1893	76.2741			-0.154282	-0.917343	-0.331049	-2.20897
	4.53314	36.9969	13.2199	76.3099			-0.138961	-0.931752	-0.326709	-2.22538
	4.5138	37.0216	13.2334	76.3014			-0.165686	-0.94401	-0.306869	-2.2572
	4.56297	37.0097	13.2294	76.2762			-0.216386	-0.945403	-0.290768	-2.29829
	4.62963	37.0184	13.2268	76.2658			-0.244088	-0.944428	-0.290224	-2.36986
	4.64125	37.0545	13.2609	76.2602			-0.230233	-0.950485	-0.311271	-2.45669
	4.59381	37.1135	13.3198	76.2951			-0.201372	-0.965264	-0.330344	-2.5165
	4.55142	37.1591	13.3608	76.4044			-0.186229	-0.980087	-0.326908	-2.55354
	4.56163	37.1688	13.3811	76.513			-0.183303	-0.979621	-0.325104	-2.58184
	4.60422	37.1616	13.4002	76.5498			-0.174668	-0.959712	-0.346578	-2.57177
	4.62432	37.1709	13.4154	76.5619			-0.150029	-0.934513	-0.368918	-2.51017
	4.59843	37.2016	13.4227	76.5806			-0.123628	-0.922134	-0.366222	-2.44088
	4.56616	37.2343	13.4353	76.5873			-0.129795	-0.924757	-0.338033	-2.39386
	4.57968	37.2564	13.45	76.6038			-0.182803	-0.932434	-0.294087	-2.3733
	4.63641	37.2754	13.4507	76.6431			-0.250474	-0.940879	-0.259082	-2.39065
	4.67785	37.3053	13.4473	76.6495			-0.28555	-0.953709	-0.26641	-2.42043
	4.65299	37.3499	13.4567	76.6071			-0.277378	-0.969618	-0.304468	-2.40359
	4.57854	37.3974	13.4638	76.5884			-0.255378	-0.981293	-0.323572	-2.33774
	4.53079	37.4245	13.4607	76.6169			-0.254974	-0.978822	-0.31317	-2.2722
	4.55965	37.4249	13.4715	76.6519			-0.289599	-0.958329	-0.302401	-2.22348
	4.63152	37.4274	13.5099	76.6935			-0.331607	-0.933056	-0.305235	-2.18586
	4.67702	37.4668	13.5654	76.7484			-0.336523	-0.924585	-0.316954	-2.17595
	4.66253	37.5349	13.6349	76.7725			-0.292456	-0.940078	-0.332055	-2.19417
	4.61453	37.5959	13.711	76.7579			-0.245306	-0.965039	-0.334603	-2.22271
	4.59846	37.6385	13.7601	76.7716			-0.235731	-0.983491	-0.314981	-2.27016
	4.63983	37.6793	13.7773	76.8328			-0.253223	-0.989214	-0.297292	-2.35248
	4.68004	37.7305	13.7971	76.9049			-0.2634	-0.991383	-0.302693	-2.44538
	4.656	37.802	13.8268	76.9869			-0.25109	-1.00061	-0.314081	-2.51141
	4.587	37.8849	13.8429	77.0772			-0.231786	-1.01162	-0.310164	-2.54359
	4.54383	37.9386	13.8449	77.1238			-0.235533	-1.01285	-0.2969	-2.54328
	4.56719	37.9412	13.8497	77.1215			-0.269184	-1.00075	-0.288311	-2.5111
	4.6356	37.9324	13.8563	77.135			-0.300536	-0.976817	-0.293283	-2.4686
	4.68608	37.9538	13.8742	77.1669			-0.293542	-0.950225	-0.310399	-2.44363
	4.67774	38.0012	13.9227	77.1773			-0.251581	-0.935266	-0.329543	-2.4306
	4.64375	38.0575	13.9776	77.1719			-0.212886	-0.93559	-0.338023	-2.41469
	4.65436	38.1097	14.0035	77.1569			-0.209235	-0.941861	-0.334311	-2.40561
	4.71611	38.1376	14.0208	77.1033			-0.236669	-0.948047	-0.333542	-2.409
	4.76489	38.1518	14.0599	77.0342			-0.263749	-0.955407	-0.342073	-2.41188
	4.76106	38.1873	14.1045	77.0228			-0.260186	-0.966645	-0.349126	-2.41409
	4.72988	38.2391	14.1395	77.0716			-0.224571	-0.981935	-0.34545	-2.42489
	4.71533	38.2701	14.168	77.1354			-0.194819	-0.997385	-0.333826	-2.43319
	4.74332	38.2797	14.1735	77.2149			-0.211914	-1.00348	-0.317172	-2.4263
	4.79095	38.2999	14.1474	77.2944			-0.26367	-0.996106	-0.298914	-2.42356
	4.79262	38.3458	14.1212	77.3175			-0.292771	-0.984643	-0.295528	-2.43648
	4.72734	38.4168	14.1066	77.2952			-0.267282	-0.982602	-0.309186	-2.45017
	4.66778	38.4977	14.0818	77.2945			-0.213117	-0.98976	-0.313822	-2.46746
	4.67914	38.5478	14.0599	77.3059			-0.187021	-0.991599	-0.294026	-2.5077
	4.7371	38.543	14.0698	77.2805			-0.217438	-0.981325	-0.270084	-2.55334
	4.7737	38.5158	14.0942	77.2348			-0.272927	-0.962795	-0.262054	-2.57489
	4.74362	38.5027	14.1105	77.1945			-0.293626	-0.942422	-0.263554	-2.58558
	4.66559	38.5045	14.1235	77.1598			-0.261594	-0.929092	-0.263425	-2.59973
	4.61704	38.5127	14.1225	77.1738			-0.221897	-0.928497	-0.256654	-2.60564
	4.65344	38.5269	14.088	77.2669			-0.229657	-0.935827	-0.246171	-2.61113
	4.7336	38.5488	14.0524	77.3621			-0.276206	-0.946712	-0.246164	-2.62614
	4.76868	38.5934	14.0639	77.3839			-0.300941	-0.960531	-0.26419	-2.62371
	4.72851	38.6666	14.1103	77.3637			-0.267545	-0.974318	-0.271519	-2.59646
	4.66677	38.7377	14.154	77.3462			-0.205351	-0.984887	-0.244577	-2.58266
	4.65034	38.7686	14.1824	77.3373			-0.176961	-0.990467	-0.207403	-2.59082
	4.68575	38.7636	14.1834	77.3725			-0.208878	-0.990199	-0.187163	-2.59183
	4.71598	38.7508	14.1536	77.4746			-0.258717	-0.98704	-0.185472	-2.58905
	4.68975	38.7538	14.1251	77.5766			-0.265535	-0.984786	-0.197366	-2.59078
	4.62567	38.7789	14.1163	77.6234			-0.227525	-0.981567	-0.209462	-2.572
	4.60054	38.8119	14.102	77.6539			-0.199972	-0.974348	-0.199871	-2.52566
	4.65396	38.8338	14.0741	77.6808			-0.221255	-0.967506	-0.177961	-2.48002
	4.74014	38.8506	14.0667	77.6782			-0.276458	-0.965371	-0.176175	-2.43831
	4.78516	38.8871	14.0917	77.679			-0.311416	-0.972258	-0.190123	-2.39349
	4.76904	38.9476	14.1324	77.7148			-0.285007	-0.987507	-0.194091	-2.3741
	4.73418	39.0025	14.1821	77.7306			-0.225242	-0.999828	-0.187037	-2.39037
	4.73516	39.0213	14.2317	77.7043			-0.201832	-0.997045	-0.173367	-2.40725
	4.77949	39.0031	14.2586	77.7077			-0.238472	-0.980672	-0.151816	-2.41941
	4.81764	38.9768	14.2675	77.7531			-0.283573	-0.963091	-0.139493	-2.44995
	4.8012	38.9819	14.2866	77.788			-0.279919	-0.955489	-0.148902	-2.47907
	4.74004	39.0326	14.3126	77.8138			-0.226347	-0.958889	-0.159514	-2.47477
	4.69592	39.0996	14.3199	77.8382			-0.177875	-0.968253	-0.152137	-2.45386
	4.71505	39.1389	14.3121	77.8283			-0.185195	-0.978486	-0.138707	-2.43332
	4.76942	39.1465	14.3046	77.8038			-0.24501	-0.983947	-0.132935	-2.40801
	4.79119	39.1583	14.29	77.8365			-0.295772	-0.988027	-0.13366	-2.38841
	4.7554	39.1966	14.2679	77.9173			-0.284971	-0.997373	-0.147126	-2.38206
	4.70139	39.2402	14.2565	77.9905			-0.233042	-1.01087	-0.17314	-2.36353
	4.68685	39.2644	14.2529	78.0617			-0.208303	-1.01926	-0.193105	-2.32415
	4.72662	39.2705	14.2455	78.1369			-0.242798	-1.01643	-0.202483	-2.2949
	4.76722	39.2799	14.2483	78.1775			-0.302852	-1.00386	-0.216613	-2.27892
	4.74563	39.3135	14.2737	78.1838			-0.331687	-0.989313	-0.229803	-2.25033
	4.68217	39.3781	14.3025	78.1942			-0.302326	-0.982254	-0.219033	-2.20575
	4.65166	39.4438	14.3223	78.1761			-0.247841	-0.985396	-0.184857	-2.16146
	4.6799	39.4743	14.345	78.0839			-0.235259	-0.992689	-0.150763	-2.11828
	4.72435	39.4826	14.362	77.955			-0.28416	-0.997729	-0.134825	-2.08118
	4.73243	39.5097	14.3597	77.8372			-0.338644	-0.996426	-0.14656	-2.07426
	4.68952	39.5536	14.3553	77.7185			-0.342829	-0.993801	-0.181504	-2.10017
	4.63946	39.5842	14.3619	77.5953			-0.310734	-0.995866	-0.210014	-2.13479
	4.64688	39.5851	14.3592	77.4784			-0.300825	-0.995827	-0.206003	-2.16587
	4.71518	39.5519	14.3412	77.316			-0.340275	-0.985556	-0.177749	-2.19013
	4.77252	39.4964	14.3333	77.0673			-0.393294	-0.972113	-0.15439	-2.19726
	4.76108	39.4531	14.3384	76.7763			-0.40417	-0.966763	-0.146728	-2.19311
	4.69813	39.4301	14.3389	76.4786			-0.36238	-0.976279	-0.139744	-2.20829
	4.63736	39.3861	14.3381	76.1668			-0.320666	-0.999133	-0.128655	-2.24344
	4.61034	39.3049	14.3292	75.8598			-0.342808	-1.0237	-0.121378	-2.2614
	4.61439	39.2255	14.2919	75.5948			-0.420273	-1.03651	-0.121668	-2.24391
	4.6141	39.1814	14.2516	75.3411			-0.473028	-1.03251	-0.133953	-2.2061
	4.58191	39.1651	14.2449	75.0567			-0.44254	-1.01855	-0.158981	-2.1612
	4.5523	39.1511	14.2433	74.7641			-0.361064	-1.00252	-0.176966	-2.12395
	4.5749	39.1081	14.2102	74.4748			-0.304787	-0.988297	-0.169929	-2.11969
	4.62307	39.0234	14.1666	74.1693			-0.313895	-0.97692	-0.15682	-2.1454
	4.62165	38.9313	14.1394	73.8709			-0.357675	-0.968978	-0.160765	-2.17167
	4.54906	38.8799	14.1251	73.6159			-0.368673	-0.963459	-0.176554	-2.1984
	4.45392	38.866	14.12	73.3853			-0.318392	-0.960101	-0.192837	-2.23778
	4.40836	38.8497	14.105	73.1678			-0.255707	-0.962859	-0.206394	-2.26223
	4.44796	38.8088	14.04	72.9976			-0.248186	-0.971516	-0.206851	-2.25261
	4.51973	38.7499	13.9349	72.8481			-0.300512	-0.97761	-0.194314	-2.23648
	4.52876	38.6928	13.8433	72.6406			-0.348475	-0.97765	-0.191753	-2.22492
	4.45711	38.66	13.7739	72.3747			-0.332582	-0.975612	-0.205386	-2.20179
	4.37946	38.6427	13.6945	72.0911			-0.2656	-0.973953	-0.218119	-2.18766
	4.36739	38.6057	13.6023	71.7871			-0.216886	-0.971666	-0.224091	-2.20188
	4.41033	38.535	13.5175	71.4826			-0.233048	-0.968502	-0.228539	-2.2165
	4.44162	38.4512	13.4398	71.2385			-0.28648	-0.969133	-0.223993	-2.21191
	4.41304	38.3746	13.3707	71.0451			-0.304665	-0.983318	-0.209347	-2.20031
	4.35044	38.3119	13.3194	70.8481			-0.262171	-1.00823	-0.201036	-2.17029
	4.32572	38.2668	13.2626	70.6601			-0.214972	-1.03053	-0.193575	-2.11178
	4.37392	38.2298	13.182	70.5051			-0.219364	-1.04047	-0.177612	-2.06721
	4.44631	38.1848	13.1056	70.3334			-0.25903	-1.03817	-0.171845	-2.06305
	4.4648	38.1345	13.0579	70.1183			-0.271225	-1.02998	-0.186218	-2.07017
	4.41211	38.0892	13.0184	69.8961			-0.224368	-1.02319	-0.20288	-2.07479
	4.34131	38.0403	12.9704	69.655			-0.153717	-1.01723	-0.214791	-2.08409
	4.30625	37.971	12.9202	69.3642			-0.13365	-1.00575	-0.228447	-2.07538
	4.30492	37.8809	12.8642	69.0714			-0.188673	-0.992871	-0.236033	-2.03669
	4.29301	37.7873	12.8022	68.8163			-0.256159	-0.990238	-0.237713	-2.01268
	4.24362	37.7079	12.7532	68.5584			-0.258972	-1.00005	-0.249448	-2.02722
	4.18773	37.6483	12.7161	68.2846			-0.198004	-1.01384	-0.259823	-2.05584
	4.18397	37.5961	12.6614	68.0419			-0.140239	-1.02128	-0.241334	-2.09239
	4.24439	37.532	12.586	67.8238			-0.1447	-1.01666	-0.202194	-2.1387
	4.31046	37.4555	12.5223	67.6027			-0.204768	-1.0044	-0.166207	-2.16099
	4.31265	37.3979	12.4909	67.4129			-0.254513	-0.993914	-0.139915	-2.13955
	4.24363	37.3785	12.4811	67.2584			-0.23903	-0.991314	-0.12693	-2.10683
	4.16318	37.372	12.4733	67.0882			-0.177024	-0.996036	-0.132065	-2.08163
	4.12553	37.3401	12.4511	66.9026			-0.138748	-1.00199	-0.139432	-2.05988
	4.13495	37.2827	12.3765	66.7394			-0.157833	-1.00746	-0.132612	-2.0538
	4.153	37.2185	12.307	66.5703			-0.192248	-1.01801	-0.124062	-2.06622
	4.13807	37.1582	12.2719	66.3603			-0.191105	-1.03696	-0.125338	-2.06744
	4.09798	37.1086	12.2605	66.1451			-0.156283	-1.06193	-0.123029	-2.05249
	4.08456	37.0677	12.2368	65.9428			-0.135118	-1.08211	-0.111621	-2.05318
	4.11487	37.0172	12.2005	65.7155			-0.173761	-1.08756	-0.10346	-2.07592
	4.14668	36.957	12.167	65.4597			-0.260326	-1.07347	-0.0997114	-2.09895
	4.144	36.91	12.1275	65.2129			-0.313475	-1.04473	-0.0960724	-2.12308
	4.11573	36.8826	12.0778	64.9798			-0.270328	-1.01365	-0.0984025	-2.16067
	4.09271	36.8578	12.027	64.7659			-0.173888	-0.993877	-0.110062	-2.20293
	4.10574	36.8292	11.9641	64.6113			-0.116458	-0.98846	-0.12223	-2.23864
	4.14896	36.798	11.8827	64.4996			-0.135206	-0.990592	-0.129916	-2.27315
	4.17	36.7563	11.8112	64.3575			-0.187279	-0.997004	-0.142823	-2.30108
	4.13432	36.7131	11.7651	64.1647			-0.205388	-1.00932	-0.164699	-2.31112
	4.07841	36.6884	11.7262	63.9568			-0.166004	-1.02507	-0.188526	-2.31465
	4.05592	36.6682	11.6914	63.733			-0.116327	-1.04239	-0.20911	-2.32385
	4.07269	36.6256	11.6728	63.4949			-0.118567	-1.06308	-0.226011	-2.32721
	4.09437	36.5696	11.6562	63.2836			-0.180406	-1.08114	-0.239353	-2.32072
	4.08152	36.52	11.6263	63.0992			-0.241349	-1.08547	-0.244326	-2.32475
	4.01844	36.4748	11.5953	62.9082			-0.241618	-1.07111	-0.242693	-2.34379
	3.94041	36.4297	11.5599	62.7189			-0.194324	-1.0424	-0.23035	-2.35771
	3.90858	36.3821	11.5017	62.5543			-0.159726	-1.01165	-0.200649	-2.36247
	3.92689	36.3139	11.4437	62.3892			-0.164952	-0.990003	-0.168041	-2.36406
	3.93528	36.2253	11.4179	62.2046			-0.181968	-0.982308	-0.155856	-2.3539
	3.90179	36.1452	11.4112	62.0246			-0.171016	-0.989519	-0.162959	-2.33765
	3.85582	36.0889	11.408	61.8422			-0.127204	-1.00961	-0.17309	-2.34109
	3.83461	36.0403	11.4195	61.6257			-0.0909596	-1.03594	-0.18336	-2.35738
	3.85131	35.9884	11.4354	61.4027			-0.107815	-1.05682	-0.190031	-2.35282
	3.88163	35.9332	11.4344	61.2125			-0.169515	-1.06575	-0.186125	-2.33687
	3.87716	35.8773	11.4312	61.0329			-0.218871	-1.06495	-0.183389	-2.33904
	3.82517	35.8254	11.4378	60.8469			-0.214616	-1.06105	-0.194521	-2.35746
	3.77979	35.7785	11.4297	60.6859			-0.175693	-1.05418	-0.203039	-2.38822
	3.78488	35.7222	11.4022	60.535			-0.153351	-1.04042	-0.193642	-2.43779
	3.82194	35.6432	11.3824	60.3508			-0.174044	-1.02301	-0.182742	-2.47828
	3.84402	35.5537	11.3712	60.1577			-0.215327	-1.01553	-0.180158	-2.48222
	3.82641	35.4772	11.3552	59.9817			-0.236753	-1.02677	-0.180722	-2.47803
	3.7886	35.4275	11.343	59.7829			-0.225993	-1.05203	-0.185949	-2.49125
	3.77639	35.4058	11.3373	59.5594			-0.210549	-1.07529	-0.19488	-2.50063
	3.80474	35.3968	11.32	59.3676			-0.224719	-1.08357	-0.194557	-2.50057
	3.83005	35.3767	11.3041	59.2078			-0.25888	-1.07628	-0.18868	-2.51098
	3.80038	35.3419	11.3214	59.0471			-0.276544	-1.05776	-0.196406	-2.52408
	3.7193	35.3127	11.3536	58.9037			-0.262705	-1.03412	-0.205426	-2.52682
	3.64829	35.2991	11.3602	58.7819			-0.233725	-1.01347	-0.197596	-2.54242
	3.64181	35.2866	11.343	58.6411			-0.216044	-0.998401	-0.185571	-2.57219
	3.68858	35.2581	11.3141	58.4884			-0.225845	-0.99163	-0.178833	-2.58332
	3.72923	35.2045	11.2793	58.3665			-0.245315	-1.00135	-0.170778	-2.57923
	3.72165	35.1336	11.2556	58.2367			-0.240028	-1.03016	-0.171766	-2.58765
	3.67647	35.0648	11.2541	58.0379			-0.208843	-1.06563	-0.189519	-2.59953
	3.63573	35.0119	11.2516	57.7976			-0.185196	-1.09031	-0.203091	-2.5985
	3.6213	34.9676	11.231	57.5598			-0.192245	-1.09299	-0.202432	-2.60026
	3.61323	34.9183	11.2109	57.3372			-0.219804	-1.07392	-0.202503	-2.5985
	3.58235	34.8627	11.2016	57.1568			-0.230305	-1.04641	-0.204097	-2.56845
	3.54011	34.8145	11.1822	57.0304			-0.191619	-1.02557	-0.199036	-2.52432
	3.52151	34.7743	11.1425	56.894			-0.123039	-1.01481	-0.196092	-2.49157
	3.54145	34.7255	11.0918	56.7057			-0.0900127	-1.0046	-0.196635	-2.46246
	3.58009	34.6585	11.0289	56.5178			-0.130149	-0.989565	-0.186021	-2.43716
	3.60026	34.5803	10.9549	56.344			-0.206071	-0.974674	-0.170972	-2.4354
	3.57484	34.5031	10.887	56.1493			-0.249392	-0.971868	-0.171353	-2.44713
	3.51425	34.4485	10.8314	55.9434			-0.237533	-0.981615	-0.184303	-2.44654
	3.46607	34.4287	10.7727	55.7579			-0.208395	-0.993435	-0.194726	-2.43945
	3.46248	34.4169	10.7214	55.574			-0.210811	-0.99612	-0.203785	-2.4339
	3.47242	34.3778	10.7045	55.3788			-0.255839	-0.987131	-0.212212	-2.41626
	3.45123	34.3188	10.7108	55.2068			-0.295653	-0.976012	-0.207638	-2.38612
	3.40873	34.2656	10.7119	55.055			-0.275307	-0.976325	-0.190815	-2.36696
	3.38925	34.2229	10.7033	54.8874			-0.206106	-0.990855	-0.175463	-2.36169
	3.41592	34.1851	10.6647	54.7136			-0.155697	-1.00748	-0.160323	-2.3572
	3.47191	34.143	10.6027	54.5623			-0.158446	-1.0098	-0.140717	-2.35865
	3.50445	34.0782	10.5477	54.4113			-0.186858	-0.996351	-0.129496	-2.36797
	3.47271	33.9952	10.5402	54.2468			-0.197087	-0.981653	-0.137946	-2.36302
	3.41132	33.9413	10.5581	54.0977			-0.174457	-0.975041	-0.157864	-2.33308
	3.39032	33.9375	10.5598	53.9546			-0.146409	-0.970281	-0.171344	-2.29705
	3.42043	33.9382	10.5428	53.7787			-0.152425	-0.960215	-0.172541	-2.26574
	3.45524	33.9018	10.5157	53.5824			-0.19529	-0.947064	-0.163808	-2.23736
	3.45865	33.837	10.4809	53.4016			-0.236489	-0.94161	-0.153518	-2.22412
	3.42646	33.7599	10.4567	53.2287			-0.240354	-0.957326	-0.158066	-2.23326
	3.38563	33.685	10.448	53.0601			-0.209343	-0.994371	-0.182394	-2.24036
	3.37546	33.5994	10.4255	52.8495			-0.180802	-1.02958	-0.208153	-2.22109
	3.39253	33.5516	10.3837	52.7002			-0.18416	-1.04064	-0.214912	-2.17605
	3.38517	33.5088	10.3581	52.5502			-0.208474	-1.03142	-0.210433	-2.11203
	3.33432	33.4637	10.3574	52.4197			-0.227816	-1.01699	-0.208006	-2.04052
	3.28604	33.4191	10.3592	52.3185			-0.230047	-1.00727	-0.200697	-1.99654
	3.28052	33.3746	10.365	52.2049			-0.223685	-0.998791	-0.18631	-1.99558
	3.29991	33.3385	10.3765	52.0528			-0.23035	-0.981704	-0.17271	-2.00662
	3.30984	33.3204	10.3698	51.8835			-0.254049	-0.951421	-0.159672	-2.00797
	3.29246	33.3043	10.3499	51.7016			-0.265208	-0.917197	-0.151082	-2.01697
	3.25804	33.2759	10.3446	51.5061			-0.239492	-0.897946	-0.161907	-2.03151
	3.24297	33.2481	10.3396	51.3256			-0.192403	-0.907277	-0.182616	-2.0226
	3.26548	33.2246	10.3094	51.1594			-0.159027	-0.939854	-0.189162	-1.99314
	3.29263	33.1845	10.2728	50.9643			-0.160265	-0.977313	-0.184988	-1.96055
	3.28573	33.123	10.2479	50.7474			-0.187535	-1.002	-0.186907	-1.91896
	3.25228	33.0625	10.2169	50.5736			-0.216068	-1.00723	-0.189685	-1.87815
	3.22923	33.021	10.1762	50.4333			-0.225841	-0.997465	-0.181993	-1.8576
	3.24555	32.9925	10.1376	50.2918			-0.218282	-0.98066	-0.164262	-1.83707
	3.30453	32.957	10.0891	50.1551			-0.205108	-0.959689	-0.129988	-1.79392
	3.36787	32.8941	10.0302	50.0197			-0.192522	-0.934846	-0.0849438	-1.75547
	3.38439	32.8055	9.98923	49.8507			-0.175463	-0.911142	-0.0596192	-1.73825
	3.34799	32.7229	9.96882	49.6704			-0.153429	-0.897018	-0.067051	-1.72231
	3.29488	32.6681	9.94258	49.5328			-0.139334	-0.895142	-0.0847873	-1.71026
	3.2543	32.6302	9.91438	49.4156			-0.148644	-0.900013	-0.0961456	-1.71509
	3.22689	32.5891	9.90965	49.277			-0.187838	-0.899752	-0.102213	-1.70816
	3.20264	32.5417	9.91961	49.138			-0.240395	-0.890496	-0.0973817	-1.66293
	3.17986	32.4925	9.92427	49.003			-0.264364	-0.880871	-0.0848011	-1.60105
	3.16942	32.4521	9.92522	48.8388			-0.23702	-0.874079	-0.0827329	-1.53553
	3.1778	32.4268	9.91701	48.664			-0.19066	-0.866446	-0.0812392	-1.45838
	3.19833	32.4071	9.88963	48.5299			-0.156893	-0.858117	-0.0588076	-1.39104
	3.21131	32.3771	9.85697	48.4184			-0.163566	-0.854093	-0.0314753	-1.35915
	3.20573	32.3372	9.83478	48.2926			-0.203557	-0.858956	-0.025192	-1.34317
	3.19305	32.296	9.81213	48.1731			-0.247027	-0.877267	-0.0368404	-1.32477
	3.19546	32.2558	9.78079	48.058			-0.267974	-0.902228	-0.05965	-1.31717
	3.21649	32.2112	9.75114	47.9075			-0.27579	-0.917101	-0.0884751	-1.31555
	3.23227	32.16	9.72498	47.7315			-0.290424	-0.90911	-0.101591	-1.30419
	3.21999	32.1079	9.69731	47.5647			-0.305453	-0.885285	-0.0904742	-1.30442
	3.18308	32.0605	9.67684	47.3934			-0.299215	-0.865229	-0.0839666	-1.32533
	3.14513	32.0216	9.66623	47.2042			-0.268188	-0.863408	-0.0982567	-1.33166
	3.12768	32.0008	9.65001	47.0293			-0.226248	-0.874897	-0.113393	-1.3014
	3.12717	31.9937	9.63028	46.8681			-0.195355	-0.882286	-0.117879	-1.25487
	3.11871	31.9739	9.62897	46.6986			-0.193728	-0.87431	-0.11884	-1.21364
	3.08827	31.9289	9.64113	46.5501			-0.223219	-0.854919	-0.120837	-1.19472
	3.0601	31.8723	9.6376	46.4493			-0.2592	-0.836578	-0.126275	-1.21694
	3.06996	31.8129	9.61694	46.3549			-0.273896	-0.827454	-0.137504	-1.26619
	3.11123	31.7509	9.59948	46.2323			-0.26927	-0.818437	-0.138821	-1.29992
	3.14375	31.6964	9.58062	46.1033			-0.261392	-0.799335	-0.112914	-1.30069
	3.13946	31.649	9.55976	45.9719			-0.25091	-0.775765	-0.0748541	-1.28796
	3.0967	31.5944	9.56304	45.8241			-0.240873	-0.767067	-0.0609442	-1.27033
	3.04342	31.5347	9.58778	45.6787			-0.243255	-0.785114	-0.0784667	-1.23727
	3.0185	31.4886	9.59603	45.5524			-0.259314	-0.815772	-0.105112	-1.19422
	3.01863	31.4553	9.56167	45.4129			-0.283509	-0.831038	-0.123489	-1.15216
	3.00398	31.4215	9.5303	45.2458			-0.307323	-0.818746	-0.128926	-1.10729
	2.96908	31.3834	9.48452	45.0853			-0.309721	-0.790751	-0.125891	-1.06823
	2.94906	31.3431	9.4048	44.9394			-0.279358	-0.768205	-0.124132	-1.05948
	2.96148	31.294	9.32384	44.7953			-0.234635	-0.76673	-0.132533	-1.0795
	2.99474	31.2417	9.25556	44.6719			-0.204536	-0.777342	-0.139638	-1.10428
	3.02408	31.199	9.19432	44.5797			-0.198764	-0.777637	-0.126518	-1.13224
	3.01774	31.1602	9.15573	44.4857			-0.208207	-0.762935	-0.105436	-1.16513
	2.97104	31.1196	9.14428	44.3721			-0.219114	-0.751512	-0.101096	-1.18883
	2.932	31.0894	9.12475	44.2624			-0.225031	-0.75541	-0.114175	-1.20231
	2.9373	31.0654	9.08491	44.1478			-0.227405	-0.769862	-0.126985	-1.22206
	2.95988	31.0271	9.05482	44.011			-0.229079	-0.780092	-0.133438	-1.23738
	2.9566	30.9787	9.03949	43.879			-0.239441	-0.774019	-0.132027	-1.22624
	2.92625	30.937	9.02675	43.7661			-0.260105	-0.75825	-0.1233	-1.20658
	2.89549	30.8982	9.03288	43.6493			-0.276408	-0.751898	-0.125108	-1.2028
	2.89036	30.8593	9.06129	43.536			-0.271892	-0.758893	-0.144872	-1.20198
	2.92213	30.8289	9.07643	43.4534			-0.245997	-0.762702	-0.158046	-1.19566
	2.96445	30.8024	9.06956	43.3754			-0.215809	-0.744051	-0.149408	-1.19501
	2.97418	30.7665	9.05735	43.262			-0.211061	-0.705685	-0.137688	-1.19113
	2.95662	30.7186	9.02926	43.1296			-0.244842	-0.672908	-0.132334	-1.17645
	2.95193	30.6603	8.98407	42.9933			-0.291661	-0.667049	-0.127757	-1.18536
	2.97227	30.5939	8.95312	42.8365			-0.311862	-0.685315	-0.125071	-1.23098
	2.99951	30.5303	8.91141	42.675			-0.291571	-0.709758	-0.119497	-1.27691
	3.0125	30.4761	8.88233	42.5394			-0.2491	-0.723907	-0.100631	-1.30929
	2.99441	30.4238	8.84702	42.4057			-0.212561	-0.728488	-0.0803002	-1.33964
	2.94677	30.3628	8.85948	42.25			-0.197258	-0.736164	-0.0788012	-1.35323
	2.89981	30.3	8.88282	42.1019			-0.2008	-0.750001	-0.0834792	-1.34128
	2.87643	30.2483	8.90872	41.963			-0.210111	-0.755073	-0.0760513	-1.33321
	2.86804	30.2106	8.94873	41.7997			-0.216095	-0.735758	-0.0644587	-1.33357
	2.854	30.1764	8.98487	41.6296			-0.223467	-0.69842	-0.0549443	-1.322
	2.82692	30.1333	8.98905	41.4909			-0.24331	-0.66839	-0.0496433	-1.31481
	2.79472	30.0777	8.97503	41.3599			-0.270588	-0.665187	-0.0593212	-1.33333
	2.77209	30.0225	8.96779	41.2167			-0.293785	-0.679973	-0.0811045	-1.3494
	2.76606	29.9801	8.95332	41.0862			-0.311048	-0.692054	-0.0871606	-1.34
	2.76672	29.946	8.91789	40.9533			-0.323075	-0.695347	-0.0720755	-1.31983
	2.75857	29.9082	8.87785	40.7863			-0.335308	-0.699541	-0.0611093	-1.28738
	2.74214	29.8673	8.84217	40.6077			-0.350349	-0.714793	-0.0605587	-1.22686
	2.73611	29.8301	8.80534	40.4613			-0.349127	-0.739124	-0.0561835	-1.16088
	2.7482	29.7997	8.77221	40.335			-0.312687	-0.750791	-0.0461357	-1.11121
	2.76187	29.7784	8.74392	40.2229			-0.260685	-0.731755	-0.0285926	-1.06713
	2.76027	29.7635	8.70684	40.157			-0.224019	-0.691264	0.0017613	-1.03288
	2.74559	29.7434	8.66248	40.108			-0.212854	-0.658838	0.0252756	-1.03294
	2.7364	29.7104	8.62642	40.0078			-0.2207	-0.657316	0.023764	-1.04625
	2.74684	29.671	8.5954	39.855			-0.231961	-0.68195	0.0136765	-1.03202
	2.76551	29.6335	8.55659	39.6811			-0.235083	-0.701508	0.0128317	-0.989899
	2.76294	29.5905	8.52098	39.4865			-0.242333	-0.694564	0.00815613	-0.93152
	2.72513	29.5334	8.50192	39.2907			-0.276282	-0.67369	-0.00894556	-0.859453
	2.67547	29.4763	8.48244	39.1475			-0.325483	-0.667827	-0.0261534	-0.795707
	2.64695	29.4294	8.45107	39.0586			-0.342185	-0.683181	-0.0346641	-0.766089
	2.63836	29.3865	8.42589	38.9826			-0.304387	-0.70085	-0.0304495	-0.758966
	2.62283	29.3498	8.4184	38.908			-0.242295	-0.699818	-0.00847875	-0.758598
	2.59411	29.3261	8.41702	38.824			-0.194488	-0.678928	0.0178488	-0.781336
	2.57178	29.2978	8.41728	38.6906			-0.167146	-0.658822	0.0220785	-0.835393
	2.56815	29.2492	8.42315	38.5099			-0.151815	-0.655753	0.00171488	-0.895253
	2.58389	29.1907	8.41833	38.3359			-0.140091	-0.664976	-0.0165973	-0.936737
	2.60606	29.1343	8.39896	38.1914			-0.127527	-0.669336	-0.0140314	-0.950771
	2.60474	29.0788	8.38612	38.0724			-0.128135	-0.661099	0.000437732	-0.923846
	2.57265	29.0306	8.37213	37.9897			-0.158631	-0.64877	0.0105796	-0.850102
	2.5428	28.988	8.33311	37.9311			-0.20564	-0.64571	0.00704031	-0.756991
	2.53853	28.9337	8.28392	37.8488			-0.239569	-0.654821	-0.0140167	-0.674053
	2.54967	28.8711	8.24615	37.727			-0.246996	-0.667098	-0.0366298	-0.613077
	2.56479	28.829	8.20347	37.6002			-0.228358	-0.667208	-0.0370082	-0.591461
	2.57022	28.8122	8.14783	37.4758			-0.195541	-0.65209	-0.0161726	-0.628977
	2.55175	28.7903	8.10488	37.3465			-0.165424	-0.637862	-0.00251597	-0.703381
	2.52849	28.7455	8.08057	37.2286			-0.14612	-0.635925	-0.00936446	-0.769996
	2.53669	28.6843	8.02853	37.1252			-0.132658	-0.636211	-0.0183979	-0.810385
	2.56544	28.6148	8.03617	37.0109			-0.124932	-0.625255	-0.0201098	-0.818899
	2.57189	28.5519	8.07513	36.8839			-0.130245	-0.601086	-0.0227745	-0.786619
	2.55006	28.5122	8.08545	36.7652			-0.147021	-0.574941	-0.033636	-0.734429
	2.52965	28.4833	8.07171	36.6427			-0.154643	-0.561516	-0.0585878	-0.701003
	2.5301	28.4424	8.05898	36.5067			-0.134995	-0.568689	-0.098811	-0.689896
	2.54965	28.396	8.04303	36.3927			-0.101056	-0.586963	-0.128188	-0.686774
	2.56452	28.3606	8.01757	36.2873			-0.0801121	-0.603032	-0.118042	-0.70303
	2.54384	28.3321	8.00692	36.2237			-0.0854533	-0.612971	-0.0849594	-0.735829
	2.49581	28.2989	8.0188	36.1451			-0.113244	-0.619168	-0.0647487	-0.755251
	2.46716	28.25	8.0312	36.0697			-0.142969	-0.622055	-0.0633074	-0.760975
	2.4784	28.1799	8.04637	35.9771			-0.150205	-0.616033	-0.0686933	-0.768065
	2.50205	28.0988	8.06878	35.8497			-0.132065	-0.594715	-0.0703881	-0.756128
	2.51327	28.0402	8.06322	35.7209			-0.109293	-0.562644	-0.0531487	-0.717169
	2.50621	27.9996	8.01341	35.604			-0.102011	-0.533553	-0.0237292	-0.701168
	2.48872	27.9652	7.9238	35.4782			-0.115956	-0.521114	-0.0154117	-0.735699
	2.48263	27.9281	7.88528	35.3537			-0.136815	-0.531203	-0.0294628	-0.79536
	2.50114	27.89	7.84337	35.2501			-0.142477	-0.553865	-0.033943	-0.863322
	2.5237	27.8536	7.81435	35.1405			-0.123546	-0.57404	-0.0181243	-0.926839
	2.52797	27.8167	7.80538	35.0127			-0.0911968	-0.585428	-5.38966e-05	-0.954458
	2.51833	27.7689	7.78413	34.8991			-0.069023	-0.593493	0.00960528	-0.951458
	2.50866	27.7029	7.74026	34.7964			-0.0669498	-0.602439	0.00335376	-0.95859
	2.49836	27.6286	7.70212	34.6719			-0.0730523	-0.60633	-0.0224925	-0.971891
	2.47214	27.5756	7.67739	34.5442			-0.071397	-0.598219	-0.0447409	-0.955934
	2.42119	27.5598	7.65664	34.4381			-0.0617492	-0.584773	-0.0468897	-0.922345
	2.36342	27.5627	7.6483	34.3288			-0.0525176	-0.576951	-0.0520227	-0.894404
	2.3308	27.5553	7.65728	34.2128			-0.0562997	-0.577038	-0.0797608	-0.868649
	2.333	27.5249	7.66454	34.136			-0.0760468	-0.578732	-0.113653	-0.854693
	2.3466	27.4781	7.65961	34.0894			-0.0963145	-0.573915	-0.135476	-0.870079
	2.34292	27.431	7.64902	34.0201			-0.10972	-0.556805	-0.140917	-0.885772
	2.31869	27.3925	7.62307	33.9196			-0.12927	-0.536574	-0.125274	-0.869654
	2.30255	27.3536	7.5685	33.7946			-0.157297	-0.529724	-0.101607	-0.845215
	2.3231	27.2998	7.50203	33.6347			-0.179058	-0.538101	-0.102426	-0.833874
	2.37245	27.2323	7.44731	33.4662			-0.185738	-0.546416	-0.122672	-0.820717
	2.41915	27.1703	7.40798	33.3422			-0.175164	-0.542149	-0.123875	-0.806659
	2.43867	27.124	7.38658	33.2614			-0.15171	-0.522947	-0.10039	-0.80645
	2.4271	27.0882	7.38754	33.197			-0.133635	-0.501851	-0.0772341	-0.801108
	2.40002	27.0557	7.39759	33.16			-0.129523	-0.495124	-0.0644256	-0.77295
	2.38106	27.0216	7.39972	33.1442			-0.126344	-0.507361	-0.0581839	-0.740601
	2.3794	26.9772	7.4025	33.1001			-0.108297	-0.533088	-0.0489823	-0.709427
	2.37776	26.9247	7.42045	33.0159			-0.0782886	-0.557379	-0.0199841	-0.666924
	2.36098	26.8788	7.43712	32.9303			-0.0483704	-0.565748	0.0264616	-0.63096
	2.33458	26.8372	7.44178	32.8487			-0.0267296	-0.560737	0.053515	-0.629585
	2.30843	26.7811	7.44983	32.7506			-0.0196136	-0.555578	0.0395581	-0.657071
	2.28851	26.719	7.46263	32.6433			-0.0261093	-0.548945	0.00959013	-0.696903
	2.27654	26.6726	7.46591	32.5292			-0.0332243	-0.528511	-0.00391288	-0.744382
	2.26048	26.6389	7.46065	32.3923			-0.0302169	-0.49411	4.83211e-05	-0.773882
	2.22854	26.6057	7.44826	32.2519			-0.03087	-0.459461	0.00344365	-0.757805
	2.20652	26.5725	7.41151	32.1553			-0.0513527	-0.436948	-0.0103295	-0.711062
	2.22709	26.5344	7.35967	32.1001			-0.0872719	-0.429489	-0.0452729	-0.670788
	2.2737	26.4898	7.33075	32.0564			-0.123636	-0.431909	-0.0868718	-0.64358
	2.30835	26.4574	7.32262	32.0093			-0.146621	-0.440762	-0.105703	-0.618802
	2.31921	26.442	7.30609	31.9324			-0.145528	-0.453068	-0.0893747	-0.597379
	2.30879	26.4114	7.28226	31.7979			-0.129415	-0.466349	-0.0665847	-0.570223
	2.29106	26.3498	7.25617	31.6307			-0.120629	-0.477224	-0.0653905	-0.521895
	2.29276	26.2848	7.21468	31.4852			-0.124219	-0.478751	-0.081268	-0.472503
	2.30853	26.2421	7.16516	31.3709			-0.123922	-0.465537	-0.0967845	-0.456309
	2.30202	26.2244	7.11773	31.274			-0.106606	-0.446376	-0.10529	-0.472401
	2.27342	26.2217	7.07969	31.2021			-0.0802798	-0.429937	-0.104004	-0.502366
	2.25473	26.2112	7.01863	31.1467			-0.0675483	-0.421721	-0.0922548	-0.541347
	2.25108	26.165	6.96389	31.0744			-0.0791797	-0.427435	-0.0825877	-0.572039
	2.24567	26.0919	6.9301	30.9786			-0.10162	-0.443987	-0.0780596	-0.565137
	2.23397	26.026	6.89481	30.877			-0.11059	-0.456385	-0.0641943	-0.52905
	2.21536	25.977	6.87264	30.7677			-0.0969772	-0.454349	-0.0431425	-0.494127
	2.19171	25.9312	6.85954	30.6555			-0.0770544	-0.443454	-0.0370975	-0.465192
	2.18411	25.8841	6.8332	30.5735			-0.0814543	-0.437106	-0.0483827	-0.444931
	2.19744	25.8376	6.79387	30.5206			-0.114107	-0.442427	-0.058491	-0.45627
	2.20037	25.7981	6.77229	30.4626			-0.143631	-0.454162	-0.0605733	-0.490241
	2.17488	25.7766	6.76458	30.4002			-0.14797	-0.460277	-0.0530174	-0.504761
	2.14451	25.7653	6.74326	30.3483			-0.131565	-0.451221	-0.0376804	-0.496437
	2.13296	25.7343	6.71535	30.283			-0.108262	-0.425964	-0.0339229	-0.494036
	2.14315	25.6716	6.69473	30.1928			-0.0897541	-0.394268	-0.0554736	-0.499354
	2.16842	25.5993	6.664	30.1014			-0.0817348	-0.372166	-0.0759402	-0.511062
	2.18974	25.5436	6.62415	30.0078			-0.0788813	-0.368375	-0.0727149	-0.538604
	2.19158	25.5074	6.59605	29.8906			-0.0778064	-0.381809	-0.0629882	-0.557253
	2.18846	25.4789	6.57145	29.7696			-0.0795424	-0.404634	-0.0620345	-0.534145
	2.1954	25.4433	6.53693	29.667			-0.087984	-0.42292	-0.0684895	-0.498088
	2.20071	25.4024	6.50975	29.557			-0.104381	-0.425646	-0.081065	-0.4811
	2.19298	25.3762	6.50737	29.4253			-0.124439	-0.414545	-0.090556	-0.467231
	2.18151	25.3723	6.52099	29.299			-0.140956	-0.397978	-0.0826051	-0.445959
	2.18137	25.3688	6.54143	29.1735			-0.150061	-0.385511	-0.0711961	-0.432029
	2.19854	25.3392	6.56371	29.0318			-0.160088	-0.377631	-0.0824932	-0.421156
	2.22427	25.2839	6.56871	28.9132			-0.182619	-0.369873	-0.104889	-0.410033
	2.23772	25.2212	6.54965	28.8475			-0.211163	-0.361191	-0.103785	-0.432024
	2.22769	25.171	6.52406	28.7977			-0.221375	-0.356146	-0.0849398	-0.490716
	2.20409	25.1414	6.51054	28.7375			-0.204198	-0.358555	-0.0588286	-0.540617
	2.18821	25.1203	6.49629	28.6858			-0.17697	-0.370792	-0.036554	-0.562413
	2.18939	25.0883	6.48289	28.6349			-0.161828	-0.387123	-0.0392299	-0.565282
	2.19402	25.0477	6.4735	28.5684			-0.173866	-0.396976	-0.068779	-0.535582
	2.1769	25.0181	6.45485	28.5098			-0.200638	-0.398824	-0.088002	-0.474695
	2.13099	25.007	6.41885	28.4628			-0.202466	-0.401973	-0.0733336	-0.432293
	2.07736	24.9925	6.37969	28.3944			-0.161706	-0.410023	-0.0472684	-0.429114
	2.04175	24.9504	6.3468	28.305			-0.111265	-0.417456	-0.035143	-0.432857
	2.03565	24.8841	6.30719	28.2198			-0.0881649	-0.418834	-0.039686	-0.424123
	2.05076	24.8169	6.26632	28.1234			-0.0960446	-0.413386	-0.0617968	-0.407036
	2.06727	24.7688	6.2464	27.999			-0.11838	-0.408102	-0.0877569	-0.381291
	2.0771	24.7506	6.24287	27.8859			-0.135411	-0.409785	-0.0921759	-0.354884
	2.09259	24.7486	6.23247	27.8051			-0.144444	-0.415141	-0.078772	-0.349578
	2.11696	24.733	6.21357	27.725			-0.165294	-0.418722	-0.0743102	-0.356199
	2.12907	24.6972	6.1989	27.6315			-0.205881	-0.416339	-0.078043	-0.354283
	2.11585	24.6639	6.18185	27.5491			-0.238046	-0.407941	-0.0665962	-0.353381
	2.08794	24.6409	6.15862	27.4767			-0.232736	-0.401754	-0.0388366	-0.370401
	2.06126	24.613	6.13561	27.4062			-0.192881	-0.402429	-0.0163235	-0.394665
	2.0513	24.5742	6.09621	27.3566			-0.146586	-0.405789	-0.0129919	-0.415312
	2.06605	24.5302	6.02996	27.3236			-0.121294	-0.407811	-0.0298123	-0.440682
	2.07798	24.485	5.9782	27.2726			-0.129448	-0.415879	-0.0593259	-0.466754
	2.05241	24.4515	5.97421	27.2042			-0.158948	-0.436388	-0.0806799	-0.475525
	2.00435	24.4415	5.9937	27.1498			-0.17756	-0.466422	-0.0827337	-0.470937
	1.97028	24.4341	6.00836	27.1111			-0.166724	-0.492821	-0.0823486	-0.468195
	1.95207	24.3989	6.02829	27.0805			-0.150577	-0.50515	-0.0988137	-0.46693
	1.93762	24.3407	6.06056	27.0595			-0.152625	-0.500426	-0.123338	-0.468244
	1.92388	24.2843	6.1063	27.015			-0.15727	-0.483146	-0.135274	-0.489692
	1.90601	24.2312	6.17832	26.9088			-0.142293	-0.459524	-0.137317	-0.524582
	1.89168	24.1806	6.25462	26.7635			-0.113942	-0.433757	-0.140038	-0.537778
	1.90269	24.1431	6.29077	26.6319			-0.0927638	-0.405505	-0.144217	-0.515541
	1.92552	24.117	6.2968	26.5252			-0.0952705	-0.378854	-0.152703	-0.469093
	1.91981	24.0964	6.30439	26.4334			-0.1179	-0.367588	-0.162178	-0.406177
	1.88999	24.0892	6.29826	26.3617			-0.139168	-0.377658	-0.154245	-0.346079
	1.8756	24.0876	6.2606	26.2969			-0.145439	-0.399804	-0.119114	-0.32872
	1.89569	24.0639	6.21055	26.2145			-0.142962	-0.422515	-0.0823102	-0.356383
	1.9433	24.0152	6.1561	26.1198			-0.152795	-0.435069	-0.0660233	-0.388532
	1.99759	23.9659	6.09456	26.0293			-0.183859	-0.43287	-0.0606832	-0.406435
	2.02187	23.929	6.05469	25.9345			-0.21679	-0.421955	-0.0542727	-0.41371
	1.99844	23.9045	6.04877	25.8423			-0.226936	-0.40964	-0.051618	-0.401346
	1.95978	23.8885	6.04056	25.7842			-0.218877	-0.396527	-0.0572315	-0.382975
	1.94107	23.864	6.01906	25.754			-0.214622	-0.379665	-0.0762083	-0.395485
	1.93545	23.8161	6.00656	25.719			-0.229125	-0.363173	-0.113129	-0.433112
	1.92654	23.7596	5.99475	25.6832			-0.252051	-0.358315	-0.144375	-0.457641
	1.91408	23.7177	5.98648	25.648			-0.24897	-0.37308	-0.142785	-0.471971
	1.90394	23.6941	5.97657	25.5799			-0.204539	-0.402296	-0.12284	-0.490711
	1.90653	23.6769	5.9422	25.4757			-0.156261	-0.433955	-0.118232	-0.498663
	1.92921	23.6517	5.91142	25.3723			-0.15234	-0.455191	-0.131399	-0.49649
	1.9511	23.6098	5.85299	25.2738			-0.190092	-0.458178	-0.14739	-0.509105
	1.94421	23.5573	5.80879	25.1638			-0.226714	-0.443814	-0.157098	-0.525428
	1.91679	23.5155	5.78008	25.0585			-0.22785	-0.425003	-0.145329	-0.516746
	1.89611	23.4899	5.74777	24.9669			-0.199112	-0.41038	-0.117735	-0.495686
	1.89273	23.4666	5.71305	24.8695			-0.17839	-0.399968	-0.10962	-0.486408
	1.89686	23.4381	5.6813	24.7718			-0.193123	-0.391138	-0.129828	-0.49509
	1.89418	23.4084	5.65556	24.6998			-0.227763	-0.384379	-0.149108	-0.532583
	1.8802	23.3791	5.64908	24.6382			-0.239534	-0.382544	-0.152377	-0.593115
	1.8696	23.3487	5.66564	24.5682			-0.211483	-0.384676	-0.151265	-0.625259
	1.87408	23.3139	5.66581	24.5182			-0.166945	-0.382833	-0.149591	-0.5967
	1.88184	23.268	5.66518	24.4939			-0.138488	-0.373998	-0.15105	-0.54731
	1.87049	23.2178	5.65689	24.4503			-0.137463	-0.362564	-0.164208	-0.514038
	1.83184	23.1879	5.66451	24.3733			-0.153504	-0.355598	-0.177455	-0.492261
	1.78828	23.1856	5.65619	24.2914			-0.163717	-0.356919	-0.173229	-0.494378
	1.77753	23.1866	5.68721	24.2059			-0.151696	-0.363135	-0.164956	-0.542176
	1.80854	23.1635	5.71113	24.1128			-0.135392	-0.366664	-0.170333	-0.620481
	1.84949	23.1172	5.72637	24.0535			-0.143541	-0.367755	-0.182063	-0.70564
	1.87246	23.0684	5.73335	24.0283			-0.169311	-0.373911	-0.192013	-0.796117
	1.88442	23.0339	5.744	23.9951			-0.182616	-0.388376	-0.203062	-0.874229
	1.90659	23.0128	5.76293	23.9361			-0.173445	-0.404251	-0.205883	-0.917876
	1.94409	22.9958	5.77142	23.8683			-0.151427	-0.41151	-0.192694	-0.939354
	1.97583	22.9693	5.76435	23.7885			-0.13608	-0.406185	-0.184305	-0.958012
	1.97034	22.9311	5.76381	23.6956			-0.145528	-0.393408	-0.195286	-0.963354
	1.9263	22.8971	5.7773	23.6157			-0.165566	-0.385227	-0.206803	-0.951253
	1.88127	22.8675	5.79651	23.5446			-0.16289	-0.38736	-0.204582	-0.941473
	1.86254	22.8189	5.82092	23.4419			-0.138257	-0.398855	-0.197561	-0.935228
	1.85984	22.7441	5.84045	23.3021			-0.124776	-0.40824	-0.191443	-0.917474
	1.85631	22.6647	5.82808	23.1628			-0.138789	-0.406591	-0.185702	-0.901903
	1.84776	22.6	5.79217	23.0441			-0.162848	-0.39938	-0.18362	-0.907606
	1.83027	22.5569	5.76505	22.9547			-0.174782	-0.398811	-0.182212	-0.920265
	1.81056	22.5349	5.74315	22.9153			-0.167336	-0.402123	-0.171081	-0.920491
	1.80244	22.5206	5.70383	22.909			-0.150226	-0.395239	-0.155975	-0.912247
	1.79218	22.4929	5.65971	22.89			-0.145057	-0.367941	-0.158854	-0.893721
	1.75881	22.4574	5.62276	22.8512			-0.163286	-0.329656	-0.180256	-0.855213
	1.72267	22.4362	5.58331	22.8107			-0.180922	-0.30132	-0.197682	-0.813417
	1.71231	22.4263	5.5498	22.76			-0.166706	-0.294962	-0.204193	-0.791097
	1.72141	22.4043	5.53375	22.6986			-0.129963	-0.300775	-0.207249	-0.789219
	1.73528	22.3676	5.49321	22.6522			-0.108654	-0.300425	-0.208851	-0.806467
	1.74118	22.3294	5.468	22.6149			-0.122545	-0.289992	-0.20273	-0.844605
	1.72058	22.2945	5.45126	22.56			-0.157971	-0.286295	-0.19282	-0.873667
	1.68486	22.2705	5.44111	22.4868			-0.185268	-0.300482	-0.173463	-0.855492
	1.67879	22.2632	5.42514	22.4062			-0.182698	-0.318684	-0.135887	-0.79792
	1.71335	22.2506	5.39215	22.31			-0.161148	-0.318959	-0.102628	-0.732233
	1.75422	22.2164	5.36167	22.2032			-0.149145	-0.298515	-0.102351	-0.668594
	1.77894	22.1777	5.32361	22.1122			-0.159173	-0.272116	-0.128106	-0.615626
	1.78428	22.1489	5.28836	22.0339			-0.178172	-0.25626	-0.152652	-0.597948
	1.77041	22.1192	5.28533	21.9455			-0.187907	-0.26033	-0.164136	-0.615173
	1.7548	22.0783	5.2989	21.8546			-0.188299	-0.277071	-0.158746	-0.640771
	1.75511	22.0261	5.29561	21.7748			-0.196935	-0.290937	-0.139831	-0.67697
	1.75614	21.9717	5.28233	21.692			-0.219667	-0.295313	-0.128916	-0.72709
	1.7353	21.9349	5.26711	21.6042			-0.238905	-0.297114	-0.138054	-0.765606
	1.70633	21.9289	5.23215	21.5354			-0.232577	-0.301576	-0.148792	-0.787681
	1.6929	21.939	5.1882	21.4804			-0.189683	-0.302415	-0.146372	-0.818208
	1.69062	21.9361	5.15881	21.4208			-0.125729	-0.285891	-0.141344	-0.849128
	1.69026	21.9111	5.12835	21.3661			-0.0830282	-0.252617	-0.136325	-0.85528
	1.68921	21.874	5.09072	21.3102			-0.0870063	-0.219286	-0.129229	-0.850678
	1.68329	21.8377	5.07581	21.2213			-0.121405	-0.204687	-0.129571	-0.841756
	1.67586	21.8043	5.08918	21.1077			-0.154328	-0.212811	-0.132846	-0.808652
	1.67966	21.7641	5.09848	21.0041			-0.169961	-0.23165	-0.120943	-0.770992
	1.68997	21.7034	5.08561	20.9051			-0.171403	-0.245879	-0.099937	-0.76515
	1.68743	21.6269	5.05802	20.8026			-0.17368	-0.252351	-0.0934178	-0.773346
	1.66707	21.5624	5.02029	20.7317			-0.180945	-0.256305	-0.0958682	-0.765754
	1.64155	21.5283	4.98857	20.7016			-0.180102	-0.260808	-0.0952669	-0.757069
	1.63022	21.5154	4.98644	20.6683			-0.167625	-0.259736	-0.0982834	-0.756465
	1.64111	21.5098	5.00662	20.6045			-0.158552	-0.249754	-0.103938	-0.750703
	1.65696	21.5017	5.02438	20.5212			-0.16478	-0.235082	-0.104056	-0.750487
	1.6575	21.4851	5.04007	20.4223			-0.175943	-0.22738	-0.105108	-0.763927
	1.6465	21.4603	5.06687	20.3189			-0.17865	-0.23319	-0.105985	-0.758498
	1.63787	21.4235	5.09468	20.2468			-0.176984	-0.247726	-0.0918017	-0.716399
	1.63788	21.3632	5.05472	20.2003			-0.183731	-0.25828	-0.0703331	-0.673033
	1.6419	21.2873	5.04327	20.1441			-0.203568	-0.252134	-0.0689678	-0.646781
	1.63801	21.2266	5.03847	20.0852			-0.228954	-0.229064	-0.0875539	-0.628591
	1.63079	21.2042	5.03357	20.0515			-0.240746	-0.206754	-0.105231	-0.629714
	1.64028	21.2103	5.02852	20.0247			-0.224595	-0.20021	-0.1202	-0.653792
	1.66317	21.2126	5.02391	19.9847			-0.194448	-0.204633	-0.12866	-0.67061
	1.66893	21.1891	5.00405	19.9528			-0.173288	-0.210622	-0.122936	-0.672964
	1.63449	21.1447	4.96312	19.9257			-0.161751	-0.213281	-0.104897	-0.683886
	1.56611	21.0972	4.92568	19.8773			-0.150891	-0.216337	-0.087663	-0.695211
	1.50249	21.0635	4.91196	19.8167			-0.140345	-0.221646	-0.0714869	-0.684683
	1.49055	21.0483	4.9154	19.7631			-0.129278	-0.227874	-0.0557664	-0.666592
	1.53138	21.0325	4.87187	19.7044			-0.118133	-0.231102	-0.0565646	-0.657549
	1.57333	21.0015	4.88701	19.637			-0.119933	-0.231166	-0.078016	-0.648308
	1.5799	20.9733	4.88843	19.5886			-0.1356	-0.229784	-0.0980868	-0.639567
	1.56589	20.9658	4.87093	19.5551			-0.148363	-0.227937	-0.103487	-0.650227
	1.56128	20.966	4.86169	19.5007			-0.151983	-0.22475	-0.0977988	-0.677276
	1.58121	20.9579	4.86969	19.4219			-0.158572	-0.219119	-0.0823531	-0.704584
	1.62053	20.933	4.86579	19.3448			-0.175122	-0.20861	-0.0602719	-0.735134
	1.64874	20.8875	4.84315	19.2723			-0.197925	-0.199208	-0.0461979	-0.767046
	1.63695	20.8364	4.81991	19.2002			-0.219803	-0.198298	-0.0456564	-0.779773
	1.60756	20.8035	4.792	19.1424			-0.227435	-0.206432	-0.0497257	-0.769015
	1.60676	20.7809	4.75653	19.0946			-0.209944	-0.216806	-0.0536134	-0.758157
	1.63002	20.738	4.73461	19.0509			-0.177512	-0.221564	-0.0684856	-0.754997
	1.63781	20.6767	4.72026	19.0342			-0.160163	-0.216172	-0.0943601	-0.749852
	1.61823	20.6311	4.69074	19.0535			-0.170246	-0.203565	-0.115532	-0.745702
	1.58662	20.6157	4.6671	19.0696			-0.19109	-0.190132	-0.127883	-0.74252
	1.56541	20.6132	4.6738	19.0581			-0.204952	-0.181964	-0.134119	-0.720068
	1.57717	20.6063	4.68778	19.0367			-0.212366	-0.178321	-0.12994	-0.676074
	1.60504	20.5837	4.68355	19.0088			-0.222958	-0.172406	-0.11475	-0.635695
	1.59516	20.5425	4.6692	18.9672			-0.243158	-0.165782	-0.106166	-0.609762
	1.53801	20.5068	4.64086	18.9193			-0.265345	-0.166209	-0.111424	-0.594867
	1.48193	20.4978	4.60374	18.8599			-0.271718	-0.176903	-0.118718	-0.605234
	1.45862	20.4937	4.59121	18.7671			-0.258971	-0.190499	-0.128847	-0.643629
	1.45964	20.4701	4.60644	18.6481			-0.243989	-0.197659	-0.145042	-0.68413
	1.46894	20.433	4.6084	18.5493			-0.242273	-0.191161	-0.15386	-0.715137
	1.47364	20.3933	4.59105	18.4919			-0.2532	-0.174269	-0.151589	-0.747353
	1.47547	20.3575	4.58308	18.4602			-0.264366	-0.160081	-0.156306	-0.7669
	1.49975	20.3331	4.5864	18.4449			-0.269691	-0.158085	-0.168451	-0.757023
	1.55148	20.3067	4.5924	18.4362			-0.269989	-0.163546	-0.17205	-0.744166
	1.58964	20.2619	4.60546	18.4113			-0.261945	-0.172616	-0.170052	-0.748783
	1.57673	20.2108	4.61113	18.3727			-0.243601	-0.186507	-0.172544	-0.747198
	1.5308	20.1787	4.59138	18.3437			-0.224082	-0.207298	-0.175624	-0.727505
	1.50042	20.1715	4.53314	18.3114			-0.209475	-0.229908	-0.180079	-0.704349
	1.51382	20.1723	4.57025	18.2544			-0.203495	-0.246	-0.19443	-0.675205
	1.562	20.1567	4.61956	18.1923			-0.214384	-0.249793	-0.204297	-0.646778
	1.60387	20.1165	4.64332	18.1412			-0.240826	-0.243478	-0.199217	-0.659568
	1.60285	20.0683	4.64378	18.0848			-0.270407	-0.23235	-0.19481	-0.714988
	1.56565	20.0379	4.62915	18.0273			-0.293337	-0.22399	-0.197927	-0.76583
	1.52375	20.0263	4.60747	17.9801			-0.309055	-0.219804	-0.200264	-0.795412
	1.48888	20.0092	4.6018	17.9224			-0.318072	-0.216579	-0.204702	-0.814758
	1.45497	19.9674	4.62218	17.8447			-0.323316	-0.210564	-0.214408	-0.818446
	1.41891	19.9137	4.64378	17.7814			-0.325548	-0.203745	-0.211668	-0.811598
	1.38985	19.8713	4.64641	17.7409			-0.319598	-0.202082	-0.197997	-0.827362
	1.3909	19.849	4.64349	17.6915			-0.310972	-0.207212	-0.200141	-0.863432
	1.43035	19.8378	4.6531	17.6247			-0.313866	-0.216146	-0.22086	-0.892265
	1.47928	19.8154	4.66996	17.5585			-0.327807	-0.225815	-0.238864	-0.922867
	1.49859	19.7689	4.68642	17.4853			-0.334991	-0.235578	-0.243864	-0.965533
	1.47459	19.7185	4.69232	17.4027			-0.323053	-0.244442	-0.231161	-0.98787
	1.42851	19.6884	4.67437	17.3468			-0.298398	-0.254168	-0.200754	-0.976196
	1.40108	19.6725	4.63961	17.3231			-0.277203	-0.265363	-0.177898	-0.96346
	1.41055	19.6512	4.61601	17.3015			-0.274944	-0.27531	-0.185331	-0.957828
	1.42594	19.6145	4.60989	17.2829			-0.291479	-0.27924	-0.203966	-0.941473
	1.41615	19.5719	4.6016	17.2778			-0.304263	-0.283364	-0.204955	-0.924168
	1.39249	19.5397	4.59127	17.2572			-0.293037	-0.295534	-0.197164	-0.904147
	1.38436	19.5205	4.60019	17.206			-0.269405	-0.312176	-0.198918	-0.852853
	1.40591	19.5029	4.62774	17.1549			-0.252734	-0.322462	-0.205901	-0.776535
	1.44038	19.4755	4.66073	17.1034			-0.239987	-0.322032	-0.214259	-0.714821
	1.44655	19.4348	4.69468	17.0248			-0.219687	-0.315716	-0.22354	-0.675938
	1.40747	19.3968	4.71605	16.9362			-0.189943	-0.316337	-0.226531	-0.647699
	1.36567	19.3775	4.70426	16.8708			-0.1532	-0.329309	-0.225328	-0.632688
	1.37274	19.3625	4.67397	16.8307			-0.121531	-0.348502	-0.238793	-0.616252
	1.42107	19.3278	4.6606	16.81			-0.116775	-0.357927	-0.266681	-0.568852
	1.46545	19.2833	4.66096	16.8104			-0.13736	-0.349411	-0.284489	-0.492421
	1.47704	19.2478	4.65913	16.8033			-0.161038	-0.326597	-0.284503	-0.416563
	1.45821	19.2234	4.66087	16.7578			-0.181463	-0.300843	-0.282992	-0.353849
	1.44322	19.2075	4.66179	16.693			-0.208359	-0.279123	-0.287212	-0.298758
	1.46963	19.1908	4.64526	16.6419			-0.241636	-0.262202	-0.294925	-0.249604
	1.52194	19.1505	4.62077	16.5936			-0.268589	-0.252638	-0.306341	-0.199419
	1.53746	19.0865	4.5976	16.5314			-0.275982	-0.255659	-0.311119	-0.132517
	1.49734	19.0297	4.55514	16.4646			-0.259363	-0.27124	-0.298723	-0.0520266
	1.44183	18.9984	4.50341	16.3921			-0.229465	-0.290848	-0.280149	0.0228584
	1.40604	18.9788	4.48459	16.3136			-0.209573	-0.30206	-0.277358	0.0911798
	1.40363	18.957	4.49712	16.2539			-0.212307	-0.292453	-0.285825	0.157234
	1.42829	18.9343	4.5093	16.2164			-0.22117	-0.260418	-0.281544	0.195029
	1.44345	18.9067	4.47715	16.1736			-0.211042	-0.218576	-0.262048	0.190657
	1.43072	18.877	4.49023	16.1219			-0.183178	-0.188156	-0.238063	0.173939
	1.42979	18.8633	4.5008	16.0813			-0.16539	-0.180809	-0.215418	0.175821
	1.46066	18.8613	4.50404	16.0435			-0.185031	-0.192125	-0.202261	0.194884
	1.48119	18.8421	4.49078	15.9984			-0.241798	-0.212243	-0.208737	0.225826
	1.45764	18.8051	4.50759	15.9605			-0.304922	-0.234063	-0.218614	0.271662
	1.40386	18.7684	4.50381	15.9334			-0.331287	-0.252804	-0.218635	0.327917
	1.3557	18.7309	4.50486	15.9003			-0.304875	-0.271267	-0.218037	0.399742
	1.35237	18.6903	4.51465	15.8581			-0.250765	-0.290515	-0.233211	0.492553
	1.40298	18.6539	4.50715	15.819			-0.207376	-0.300984	-0.256431	0.567988
	1.45737	18.6187	4.48264	15.7789			-0.191703	-0.288822	-0.271987	0.575657
	1.46115	18.5886	4.4526	15.7304			-0.192866	-0.259244	-0.270188	0.525876
	1.42437	18.579	4.40329	15.6867			-0.197002	-0.227963	-0.242179	0.461872
	1.39394	18.5808	4.34041	15.6519			-0.205306	-0.206927	-0.200093	0.39457
	1.39058	18.5651	4.291	15.6096			-0.224339	-0.198802	-0.178453	0.334926
	1.39697	18.5233	4.24922	15.5665			-0.24639	-0.201929	-0.188315	0.307877
	1.38478	18.467	4.19234	15.5419			-0.248166	-0.210194	-0.208815	0.296194
	1.34675	18.4142	4.13735	15.5222			-0.209606	-0.221835	-0.226042	0.271142
	1.31592	18.3766	4.11882	15.4903			-0.147044	-0.23532	-0.242661	0.252476
	1.33449	18.3517	4.13921	15.4623			-0.107904	-0.245827	-0.251347	0.263903
	1.39127	18.3268	4.17932	15.4366			-0.114368	-0.249264	-0.247719	0.290039
	1.42867	18.295	4.21425	15.3891			-0.142795	-0.245351	-0.242342	0.327386
	1.41564	18.2627	4.21742	15.3268			-0.161196	-0.23651	-0.233294	0.382726
	1.37679	18.2382	4.18938	15.2701			-0.160716	-0.226238	-0.218439	0.426296
	1.35591	18.2133	4.16005	15.2037			-0.157517	-0.219896	-0.215818	0.434319
	1.37259	18.1833	4.14477	15.1175			-0.174945	-0.220436	-0.23508	0.427723
	1.40165	18.1506	4.12607	15.0395			-0.211462	-0.228112	-0.256199	0.415445
	1.40119	18.1149	4.09121	14.9808			-0.234184	-0.240781	-0.266302	0.376248
	1.36948	18.0776	4.04857	14.929			-0.224694	-0.253717	-0.274618	0.320026
	1.34167	18.0481	4.00977	14.8935			-0.201817	-0.261481	-0.282668	0.280231
	1.34491	18.0267	3.97412	14.8808			-0.197979	-0.265867	-0.28975	0.257529
	1.37355	18.0034	3.95852	14.8533			-0.228139	-0.266783	-0.306093	0.251611
	1.39259	17.9784	3.97013	14.7819			-0.277133	-0.262102	-0.322868	0.278491
	1.37227	17.9542	3.98405	14.6967			-0.303896	-0.254201	-0.316011	0.322986
	1.32847	17.9279	3.98147	14.6151			-0.281075	-0.251636	-0.294047	0.342145
	1.30223	17.9015	3.97043	14.5244			-0.232223	-0.255841	-0.286533	0.330942
	1.30971	17.8794	3.97452	14.439			-0.201723	-0.261676	-0.29943	0.303495
	1.33679	17.8594	3.96691	14.3733			-0.202124	-0.263669	-0.318016	0.244009
	1.35838	17.8389	3.94847	14.3064			-0.210789	-0.264564	-0.335481	0.155816
	1.35902	17.8136	3.93062	14.2324			-0.209949	-0.265712	-0.344783	0.0800018
	1.35137	17.7851	3.90825	14.1773			-0.201009	-0.268886	-0.342491	0.0389743
	1.35117	17.7548	3.88334	14.1269			-0.200827	-0.272024	-0.347977	0.0234382
	1.34068	17.7198	3.87341	14.0541			-0.230518	-0.27102	-0.373241	0.0272079
	1.30001	17.6856	3.89784	13.9837			-0.277504	-0.263051	-0.393391	0.0348873
	1.2487	17.6629	3.91132	13.9391			-0.289614	-0.251233	-0.388417	0.0146898
	1.2211	17.6434	3.90929	13.8953			-0.240421	-0.245245	-0.376312	-0.0287677
	1.22314	17.6205	3.89235	13.8371			-0.173787	-0.251944	-0.378586	-0.050401
	1.24061	17.6069	3.87169	13.7829			-0.148885	-0.269015	-0.392176	-0.0280194
	1.25023	17.6034	3.83459	13.7368			-0.17942	-0.288676	-0.404599	0.0201565
	1.23116	17.5911	3.81885	13.6986			-0.230558	-0.303053	-0.405169	0.0752687
	1.19923	17.5636	3.82212	13.693			-0.249622	-0.307128	-0.383552	0.128619
	1.20164	17.5253	3.81843	13.7241			-0.21966	-0.302277	-0.347921	0.163898
	1.24274	17.4732	3.81046	13.7546			-0.178983	-0.294783	-0.332262	0.181696
	1.27049	17.4144	3.77007	13.762			-0.173155	-0.290737	-0.341603	0.203157
	1.25549	17.3677	3.7545	13.7542			-0.1981	-0.289613	-0.346757	0.226394
	1.21417	17.3378	3.72249	13.7226			-0.210476	-0.289578	-0.328521	0.228851
	1.17282	17.3116	3.71373	13.6677			-0.183594	-0.2904	-0.300892	0.211741
	1.16012	17.2877	3.72533	13.6221			-0.140153	-0.292407	-0.287079	0.186405
	1.18888	17.2752	3.7329	13.596			-0.120881	-0.293171	-0.29553	0.148825
	1.22196	17.2676	3.73745	13.5668			-0.136371	-0.293277	-0.324347	0.114576
	1.22446	17.2518	3.73546	13.5284			-0.159379	-0.293647	-0.353015	0.114833
	1.21842	17.2291	3.71952	13.4924			-0.156749	-0.296678	-0.359389	0.139455
	1.2304	17.1934	3.7165	13.4543			-0.128649	-0.301615	-0.35371	0.156792
	1.25423	17.1391	3.74145	13.4149			-0.114308	-0.309629	-0.363149	0.17031
	1.27986	17.0902	3.75483	13.3828			-0.146555	-0.314547	-0.385425	0.19853
	1.2914	17.0673	3.72898	13.3432			-0.20758	-0.30727	-0.395266	0.231648
	1.27406	17.0514	3.68386	13.2794			-0.247795	-0.288978	-0.385426	0.256164
	1.24851	17.0256	3.63337	13.2083			-0.236675	-0.273397	-0.364984	0.270378
	1.24534	16.9941	3.57331	13.1482			-0.18932	-0.271045	-0.34419	0.25829
	1.24991	16.963	3.5244	13.0884			-0.14439	-0.281928	-0.338269	0.217439
	1.22582	16.9394	3.50507	13.0178			-0.126093	-0.296241	-0.350912	0.189605
	1.17442	16.9278	3.50295	12.9556			-0.129111	-0.303097	-0.355097	0.20268
	1.13069	16.9137	3.51392	12.9105			-0.13196	-0.300406	-0.335436	0.225814
	1.12453	16.8832	3.53939	12.8693			-0.124319	-0.298762	-0.319754	0.232733
	1.15702	16.8439	3.55738	12.8339			-0.12038	-0.309571	-0.332891	0.223308
	1.19866	16.8077	3.54107	12.8132			-0.136097	-0.328506	-0.37011	0.177519
	1.21325	16.7819	3.51091	12.7933			-0.154861	-0.341672	-0.412363	0.0949817
	1.19897	16.7695	3.49097	12.7711			-0.142385	-0.341521	-0.440839	0.0318844
	1.18872	16.764	3.47992	12.7635			-0.0951754	-0.333796	-0.444105	0.0265585
	1.19693	16.7543	3.47278	12.7557			-0.0455934	-0.328747	-0.439371	0.067398
	1.20127	16.7356	3.4719	12.7186			-0.0319669	-0.329384	-0.454352	0.145668
	1.17825	16.715	3.46446	12.6674			-0.0607244	-0.3288	-0.475152	0.245967
	1.13456	16.6979	3.44317	12.6265			-0.0915003	-0.322496	-0.473878	0.311179
	1.10356	16.6731	3.42339	12.5861			-0.0835226	-0.311896	-0.458063	0.31349
	1.11575	16.63	3.41948	12.5419			-0.0528913	-0.304819	-0.450248	0.289154
	1.16273	16.5753	3.42304	12.5163			-0.0505818	-0.306637	-0.456074	0.272175
	1.20409	16.5272	3.4258	12.5052			-0.0919683	-0.316891	-0.474603	0.270347
	1.21099	16.5027	3.43425	12.4881			-0.144212	-0.324475	-0.49848	0.299205
	1.19048	16.5056	3.44471	12.4761			-0.159193	-0.320581	-0.507365	0.359592
	1.17488	16.5115	3.4488	12.4772			-0.122573	-0.308601	-0.500638	0.410296
	1.18888	16.4967	3.45111	12.4626			-0.0789114	-0.302116	-0.506899	0.430729
	1.21772	16.4696	3.46154	12.4141			-0.0855845	-0.306254	-0.530468	0.43412
	1.2275	16.4527	3.46039	12.3606			-0.137986	-0.317426	-0.541952	0.410944
	1.21169	16.4497	3.4346	12.3114			-0.171875	-0.324271	-0.531138	0.347983
	1.18985	16.4472	3.40585	12.2557			-0.144539	-0.318278	-0.51287	0.283998
	1.1853	16.4272	3.39317	12.2124			-0.0796825	-0.300578	-0.501615	0.263873
	1.20677	16.3845	3.39556	12.1864			-0.0331798	-0.280483	-0.510242	0.280857
	1.22923	16.3312	3.41223	12.1463			-0.034776	-0.265993	-0.538257	0.31769
	1.21166	16.2851	3.42956	12.0887			-0.0686189	-0.256909	-0.555005	0.363776
	1.16351	16.2593	3.41397	12.0424			-0.0896573	-0.253474	-0.533542	0.383522
	1.13183	16.2471	3.36709	12.0034			-0.0746035	-0.261958	-0.497664	0.355314
	1.13355	16.23	3.33276	11.9549			-0.062689	-0.285857	-0.488913	0.308258
	1.14958	16.2136	3.32625	11.9161			-0.104193	-0.318616	-0.509065	0.269902
	1.15822	16.2166	3.32946	11.8968			-0.1824	-0.343743	-0.532174	0.231917
	1.14642	16.2276	3.33863	11.8774			-0.229403	-0.34458	-0.542195	0.192598
	1.12082	16.2247	3.35686	11.8535			-0.202738	-0.319427	-0.535684	0.163152
	1.10653	16.2004	3.37164	11.8347			-0.121848	-0.282435	-0.520124	0.138208
	1.10526	16.156	3.38536	11.8044			-0.0519015	-0.254908	-0.514516	0.112546
	1.09118	16.0978	3.40864	11.7524			-0.0445134	-0.246031	-0.526747	0.106137
	1.06298	16.056	3.41642	11.7049			-0.0766745	-0.247108	-0.534858	0.138383
	1.04841	16.0341	3.39408	11.6788			-0.0796915	-0.241131	-0.516739	0.199318
	1.05263	16.0012	3.38117	11.6618			-0.0337649	-0.225569	-0.485528	0.272235
	1.06471	15.9469	3.40104	11.65			0.00834378	-0.210446	-0.461521	0.343434
	1.08944	15.899	3.42849	11.6482			-0.00845188	-0.206803	-0.451997	0.380321
	1.12003	15.8792	3.44976	11.6351			-0.0735757	-0.211744	-0.460824	0.359253
	1.13003	15.8827	3.46477	11.5985			-0.119667	-0.217669	-0.481596	0.306323
	1.12458	15.8928	3.46599	11.5567			-0.0961372	-0.21595	-0.495165	0.262363
	1.1249	15.8936	3.46172	11.5103			-0.0250201	-0.205655	-0.494047	0.236272
	1.11944	15.8725	3.47595	11.4419			0.0232399	-0.192861	-0.496239	0.232206
	1.09578	15.8408	3.47343	11.3616			0.00112351	-0.181085	-0.505906	0.260004
	1.07475	15.8207	3.45728	11.2941			-0.0653649	-0.16598	-0.500161	0.299561
	1.07683	15.8029	3.4265	11.2486			-0.105128	-0.147264	-0.472642	0.325138
[truncated: 5,501 more rows]

## Sheet: panel_E
	0.0893617	0.0520644	0.0547201	0.12873			-0.077599	0.0163998	-0.0637103	-0.237524
	0.126596	0.0316342	0.0292935	0.146852			-0.0320046	0.014156	-0.0476064	-0.241423
	0.154014	0.00408322	0.0181293	0.146823			0.00363753	0.0153248	-0.0372608	-0.23806
	0.124625	-0.0131549	0.0208042	0.127799			0.0059403	0.0233425	-0.03437	-0.217008
	0.0424395	-0.0218511	0.0482988	0.110888			-0.00935977	0.031944	-0.0308466	-0.199438
	-0.0403187	-0.0284185	0.0904348	0.0817715			-0.0128245	0.0344559	-0.0212187	-0.198717
	-0.0790941	-0.0147074	0.11224	0.0158878			0.003034	0.0326078	-0.0132454	-0.200249
	-0.0640189	0.0234094	0.107917	-0.0544878			0.0128825	0.0305988	-0.0165072	-0.200874
	-0.0154422	0.0623245	0.0973986	-0.0903989			-0.0117913	0.0322719	-0.0317541	-0.207293
	0.0231079	0.0841583	0.0764276	-0.106574			-0.0580771	0.0375302	-0.0505748	-0.206386
	0.0248293	0.0865056	0.0358742	-0.115082			-0.0829285	0.0374903	-0.0645973	-0.186668
	0.010394	0.0636634	-0.00131171	-0.100736			-0.0557227	0.029603	-0.07095	-0.159198
	0.0172234	0.0254807	-0.0194162	-0.0802355			0.00460159	0.0282155	-0.0729531	-0.130993
	0.0478065	-0.00297699	-0.0307215	-0.0797105			0.0396687	0.0427104	-0.0788811	-0.0992254
	0.0780407	-0.0135237	-0.0303906	-0.0837618			0.0190478	0.0643217	-0.090545	-0.0795031
	0.0925858	-0.0204418	-0.0116044	-0.0744506			-0.0287921	0.0756477	-0.0910842	-0.0888816
	0.0961992	-0.0305421	-0.00424573	-0.063947			-0.0613556	0.0712941	-0.0680004	-0.115437
	0.098202	-0.0384095	-0.0281306	-0.0464327			-0.0659145	0.056345	-0.039552	-0.138572
	0.104947	-0.0436619	-0.0514445	-0.00556391			-0.0518461	0.0387947	-0.0289376	-0.151585
	0.111396	-0.0463387	-0.0547837	0.0293457			-0.0431899	0.0284068	-0.0368001	-0.15068
	0.097503	-0.035633	-0.0506181	0.0279606			-0.0534867	0.0243696	-0.0511667	-0.136742
	0.0549905	-0.0112388	-0.032896	0.0128087			-0.0594823	0.0156309	-0.0628622	-0.125464
	0.0202347	0.00575103	-0.000909404	0.00244213			-0.0347238	-0.000758163	-0.0607246	-0.133771
	0.0330099	0.00488186	0.0104457	-0.0190065			0.00820248	-0.0152817	-0.0512042	-0.151236
	0.0807333	-0.00306383	-0.00173602	-0.0442672			0.0339307	-0.0254707	-0.0535123	-0.153126
	0.122008	-0.0184338	-0.00177092	-0.0395643			0.0238459	-0.03208	-0.0650334	-0.138524
	0.126358	-0.0483956	0.0064915	-0.00898062			-0.00490571	-0.0347866	-0.0676823	-0.120565
	0.0917863	-0.0794897	-0.000507548	0.0233851			-0.0177468	-0.0351971	-0.059682	-0.104496
	0.0483167	-0.0943904	0.00220999	0.0585061			0.00147366	-0.0376782	-0.0500858	-0.098038
	0.0388324	-0.0951189	0.0353394	0.0864748			0.027755	-0.0358492	-0.0369649	-0.104776
	0.0581543	-0.0847265	0.0649591	0.0774011			0.0240553	-0.0195291	-0.0235793	-0.113062
	0.05591	-0.0591867	0.0677078	0.0389937			-0.00841153	0.008807	-0.0208669	-0.118551
	0.00726506	-0.03172	0.0539407	0.0101021			-0.0299904	0.0335828	-0.024489	-0.135617
	-0.0581254	-0.0161442	0.0253311	-0.00482714			-0.0237691	0.0420057	-0.0215646	-0.165974
	-0.0975748	-0.00563102	-0.0067726	-0.0142347			-0.00730973	0.0324775	-0.0127236	-0.190085
	-0.0840901	0.00633571	-0.00652448	-0.00500334			4.70848e-05	0.0130711	-0.00499713	-0.202716
	-0.0243785	0.00329794	0.0249547	0.020672			-0.0112203	-0.00849983	0.00450507	-0.205544
	0.0391333	-0.0135602	0.0460996	0.0347169			-0.0370049	-0.026662	0.0132508	-0.192472
	0.0661153	-0.015692	0.0486355	0.0397683			-0.0488942	-0.0440925	0.0143926	-0.169317
	0.0663267	0.00293359	0.0510725	0.0620277			-0.0264079	-0.0663251	0.0115948	-0.151465
	0.0679242	0.0217219	0.0461918	0.0962671			0.00673974	-0.0874205	0.00811701	-0.130849
	0.0708494	0.0371322	0.0319228	0.124009			0.0283366	-0.0970198	0.00168425	-0.0861089
	0.0619188	0.0478721	0.0303577	0.146324			0.0395571	-0.0964032	-0.00603444	-0.0278252
	0.0401838	0.0401415	0.0394025	0.152547			0.0436379	-0.0925361	-0.00587123	0.016685
	0.00759657	0.0222104	0.0367522	0.121346			0.0481746	-0.0862113	0.00381745	0.0423293
	-0.0187392	0.0183047	0.033654	0.0680254			0.0587239	-0.0754365	0.023206	0.0484457
	-0.00739744	0.022475	0.0512855	0.0290937			0.0535761	-0.0606467	0.0469725	0.026761
	0.0328485	0.0227919	0.0774362	0.00702141			0.0151474	-0.0420595	0.0580763	-0.00725565
	0.059636	0.0259793	0.0913604	-0.0047188			-0.0283273	-0.0228578	0.0475556	-0.0328695
	0.05994	0.0333324	0.0952945	0.00910701			-0.0385868	-0.0155335	0.025044	-0.0596418
	0.0520469	0.0379307	0.0950126	0.0440988			-0.0182737	-0.0257552	0.00111961	-0.0873654
	0.0399777	0.0516732	0.0922263	0.077975			-0.00180107	-0.0448434	-0.020417	-0.0929997
	0.0202393	0.080963	0.0963269	0.121057			-0.0113498	-0.0583409	-0.0334919	-0.0783568
	-0.00540665	0.102687	0.104248	0.184681			-0.0338276	-0.0623079	-0.0333558	-0.0606088
	-0.0382266	0.104662	0.0935176	0.23454			-0.0376602	-0.0610314	-0.021804	-0.0277351
	-0.0703188	0.0965313	0.0596228	0.245179			-0.00665517	-0.0608387	-0.00011838	0.0270795
	-0.0746154	0.0821184	0.0326578	0.232291			0.0341289	-0.0634366	0.0284316	0.0726328
	-0.0494928	0.0569419	0.0329985	0.205059			0.0414244	-0.0648854	0.0500599	0.0907778
	-0.0336186	0.0334646	0.0456958	0.170091			0.00204613	-0.0600875	0.0497476	0.088822
	-0.0550591	0.0172404	0.0590608	0.161489			-0.0483542	-0.0532598	0.0280224	0.0666852
	-0.0919714	-0.00234448	0.0726918	0.184705			-0.0705735	-0.0500878	-0.00323819	0.0239612
	-0.111227	-0.0202928	0.0719128	0.192098			-0.0604075	-0.0462165	-0.0311538	-0.0214653
	-0.0978071	-0.0161786	0.0530666	0.165568			-0.0413332	-0.0369302	-0.0495058	-0.056767
	-0.0554954	0.0039046	0.0426168	0.140378			-0.0413294	-0.0256093	-0.0589719	-0.0892712
	-0.0134286	0.022212	0.0497019	0.128255			-0.064049	-0.0178769	-0.0626222	-0.115035
	-0.0153125	0.036156	0.0524661	0.113113			-0.0821978	-0.0238102	-0.0583408	-0.115924
	-0.0599074	0.0442695	0.0529595	0.0978429			-0.0671953	-0.0466556	-0.0364901	-0.0971753
	-0.0948991	0.0384619	0.0648585	0.0842925			-0.0222726	-0.0721188	0.0037272	-0.0712092
	-0.0848479	0.0302435	0.069081	0.0582762			0.0211851	-0.0783124	0.044734	-0.0246861
	-0.0482507	0.0337456	0.0488831	0.0392559			0.034705	-0.0633174	0.0578343	0.0455176
	-0.0252577	0.0380491	0.0239278	0.0599424			0.0253357	-0.0433811	0.0340947	0.10219
	-0.0392627	0.0318199	0.00176919	0.100654			0.0236363	-0.0331016	-0.00439006	0.111478
	-0.0795129	0.0249644	-0.0241091	0.131662			0.0354043	-0.0412891	-0.0290586	0.0725348
	-0.105823	0.0220531	-0.0280252	0.167805			0.0412624	-0.0607898	-0.0338369	0.00356764
	-0.0862594	0.0122958	0.00674991	0.206403			0.0223682	-0.0730614	-0.0275279	-0.0616479
	-0.040464	-0.0051218	0.0387174	0.209686			-0.0201885	-0.0684984	-0.0236961	-0.086689
	-0.0234016	-0.019129	0.0361781	0.174208			-0.0571552	-0.057528	-0.0324764	-0.0725534
	-0.0515783	-0.0295119	0.0212855	0.128237			-0.0510588	-0.0520792	-0.0387638	-0.0496666
	-0.0899871	-0.0376347	0.00610929	0.0729799			-0.00531265	-0.0503775	-0.0161971	-0.0309038
	-0.10319	-0.0281885	-0.0174578	0.0116224			0.0336674	-0.0448611	0.0247723	-0.00377474
	-0.0883712	0.00335127	-0.033986	-0.0211566			0.0401153	-0.0350135	0.0449587	0.0442566
	-0.0554677	0.0351641	-0.042015	-0.0181581			0.0260735	-0.0226807	0.0309734	0.108312
	-0.0301704	0.0526223	-0.0709187	-0.0105229			0.015219	-0.0140279	-0.00124785	0.173159
	-0.0345295	0.0615381	-0.106882	-0.0071944			0.0168541	-0.0194127	-0.0316902	0.220639
	-0.0581647	0.0566053	-0.106554	0.005887			0.0181785	-0.0382444	-0.0358082	0.233902
	-0.0494327	0.0343905	-0.0817647	0.0155994			-0.00169663	-0.0509321	-0.0094957	0.215957
	-0.0272831	0.0124475	-0.0667339	0.0093104			-0.0329554	-0.0432026	0.0144389	0.188326
	-0.0196002	0.000613548	-0.0533299	0.00749909			-0.038113	-0.0207036	0.0101719	0.156186
	-0.0320108	-0.0148849	-0.0366575	0.0140598			-0.00155889	-0.00301962	-0.00382217	0.117678
	-0.0469383	-0.0301699	-0.0347825	0.0036161			0.0455456	-0.00437139	-0.00289308	0.0886785
	-0.0446944	-0.0264785	-0.0323815	-0.0166289			0.0636747	-0.0228698	0.00819125	0.0797262
	-0.0183268	-0.00922021	-0.00484972	-0.0163963			0.0475622	-0.0392453	0.0138527	0.0780383
	0.00259407	0.00532347	0.0209681	-0.00334745			0.0210822	-0.036233	0.00236987	0.0791027
	-0.0143548	0.0162137	0.0183564	0.00413144			0.0163676	-0.0142285	-0.0260002	0.0895307
	-0.0514286	0.018286	0.00399904	0.0134004			0.0404699	0.0130745	-0.052586	0.102497
	-0.0578068	0.002424	-0.00825942	0.0175351			0.056236	0.0286445	-0.0552127	0.114536
	-0.0246042	-0.0164524	-0.0239092	-0.00168987			0.034505	0.0295429	-0.0439305	0.134091
	0.0117898	-0.0120199	-0.0300216	-0.0304408			0.00286854	0.0250295	-0.0428355	0.151488
	0.0220252	0.00666355	-0.0213705	-0.0457296			0.00177909	0.0199952	-0.0531479	0.144969
	0.00143211	0.016569	-0.0235161	-0.0555643			0.0242143	0.0176056	-0.0583064	0.112844
	-0.02831	0.0151826	-0.0404386	-0.0600663			0.037122	0.023519	-0.045758	0.0708241
	-0.0298798	0.00673649	-0.0436681	-0.0356893			0.0186256	0.0340801	-0.0175725	0.0282587
	0.00590677	-0.00954976	-0.0326721	0.00975621			-0.0280402	0.0435369	0.00605149	-0.00580302
	0.0351104	-0.0189526	-0.0316691	0.0359078			-0.0658256	0.0547339	0.00200368	-0.015992
	0.0249986	-0.00942872	-0.040071	0.0284046			-0.0625314	0.0690793	-0.0216361	-0.0103639
	-0.00858025	0.00358286	-0.0474366	-3.86216e-05			-0.0384871	0.0771938	-0.0325857	-0.013724
	-0.0387177	0.0117754	-0.0579155	-0.043207			-0.0380862	0.0752797	-0.0170149	-0.018259
	-0.0501039	0.0199937	-0.0673528	-0.0813521			-0.0684911	0.0670806	0.0135733	-0.00273344
	-0.03354	0.0203285	-0.0630835	-0.0832313			-0.0978744	0.0545965	0.034194	0.0190883
	-0.00466373	0.00408467	-0.0550486	-0.0639475			-0.0913502	0.0414305	0.0247346	0.0369431
	0.0127074	-0.00879612	-0.0578276	-0.0615964			-0.0446204	0.0355394	-0.00537614	0.0615955
	0.0241425	-0.00697217	-0.0553503	-0.0664502			0.0171329	0.0386619	-0.0219108	0.0805885
	0.0523423	-0.00145367	-0.0273335	-0.0560036			0.0605061	0.0489321	-0.00934528	0.0754719
	0.0852021	0.00548552	0.0148108	-0.044136			0.0720096	0.0668428	0.0110272	0.0630991
	0.0932264	0.0182648	0.0478205	-0.0401412			0.0726762	0.0901083	0.0149751	0.0531035
	0.0666852	0.0270162	0.0594554	-0.035406			0.0871197	0.106523	0.00255829	0.0252121
	0.0228458	0.0272498	0.0398385	-0.0484418			0.103622	0.108062	-0.0074735	-0.0150326
	-0.0133506	0.0299058	-0.0128281	-0.090431			0.0928367	0.100584	0.000593839	-0.0365417
	-0.0209861	0.0401755	-0.0656797	-0.125611			0.0599379	0.0958521	0.0260841	-0.0304628
	-0.00654191	0.0484742	-0.0857925	-0.135303			0.0419554	0.0981956	0.0515709	-0.00130561
	-0.00717291	0.0543933	-0.0842393	-0.145372			0.0632225	0.104562	0.0591692	0.0433891
	-0.0485455	0.0582578	-0.0830188	-0.156906			0.110942	0.100441	0.0495106	0.0777046
	-0.103289	0.0486521	-0.0730336	-0.143363			0.136468	0.0758914	0.0433077	0.0690706
	-0.12632	0.0208221	-0.0489655	-0.11131			0.0991135	0.0473356	0.0541468	0.0222873
	-0.109947	-0.0124029	-0.0241739	-0.0820032			0.0192902	0.0332749	0.0740682	-0.0212931
	-0.0761234	-0.0452583	0.00291354	-0.0511969			-0.0314764	0.0333887	0.0841997	-0.0344685
	-0.0494893	-0.0800615	0.0303992	-0.030164			-0.0147281	0.0400545	0.0733562	-0.0180043
	-0.0437205	-0.102193	0.0315489	-0.0448666			0.0325068	0.0514795	0.0484012	0.0223006
	-0.0522332	-0.0936735	0.00695742	-0.0785222			0.0485264	0.0633704	0.0280683	0.0678715
	-0.0472657	-0.0648694	-0.00356518	-0.097796			0.0173855	0.0750422	0.0278988	0.0931541
	-0.0183411	-0.0413892	0.00197424	-0.120225			-0.0216027	0.0896262	0.0447236	0.106053
	0.00899708	-0.0339949	-0.00746512	-0.163179			-0.025931	0.0954742	0.0603161	0.130719
	0.000872284	-0.0430265	-0.0264406	-0.195477			0.0109989	0.0783542	0.0637367	0.159383
	-0.0309277	-0.061345	-0.0374661	-0.199904			0.0459856	0.0465831	0.0666563	0.170187
	-0.0499152	-0.0698029	-0.0509422	-0.188953			0.0324836	0.0154598	0.0808302	0.166592
	-0.0448593	-0.0541766	-0.0594828	-0.159129			-0.0172544	-0.0109885	0.0936962	0.161671
	-0.0312634	-0.0309777	-0.0436896	-0.114537			-0.0478045	-0.0337224	0.0939877	0.16253
	-0.0274468	-0.0234187	-0.0303409	-0.103023			-0.0398214	-0.0481441	0.0866161	0.173801
	-0.0470689	-0.0273682	-0.0492603	-0.149672			-0.0246431	-0.0524359	0.0804278	0.190257
	-0.0687762	-0.0285354	-0.0709898	-0.216258			-0.0289047	-0.0468878	0.0823852	0.197156
	-0.0466227	-0.0318281	-0.0721935	-0.258274			-0.0492539	-0.0308602	0.0991618	0.192582
	0.0196096	-0.0372842	-0.0760094	-0.259174			-0.058473	-0.00626292	0.118409	0.189351
	0.0711631	-0.0344102	-0.0843106	-0.214067			-0.0296466	0.0131536	0.114432	0.19673
	0.0788277	-0.0324649	-0.0783298	-0.140234			0.0225626	0.0175339	0.089273	0.20665
	0.0639498	-0.0430228	-0.0741304	-0.0859854			0.0496186	0.00940104	0.0648748	0.212138
	0.0588833	-0.0507293	-0.0785488	-0.0753377			0.0320783	-0.00882208	0.0513349	0.221303
	0.0831109	-0.0506202	-0.0649587	-0.0823011			0.00218543	-0.0330007	0.0442947	0.231394
	0.131246	-0.0614991	-0.042135	-0.0921288			-0.00214606	-0.0502245	0.0406687	0.234702
	0.162732	-0.0819244	-0.0520722	-0.114514			0.0264787	-0.0491345	0.0365621	0.239831
	0.14898	-0.0879573	-0.0845293	-0.131915			0.0626697	-0.0318645	0.0319495	0.245246
	0.113528	-0.0835335	-0.098516	-0.119601			0.0695381	-0.00609962	0.0387018	0.233306
	0.090158	-0.077456	-0.0879631	-0.0992233			0.0326168	0.0206006	0.0597557	0.205109
	0.0847981	-0.0659327	-0.0577034	-0.0948999			-0.0146656	0.0383205	0.0767462	0.177026
	0.0909704	-0.0627884	-0.0128043	-0.0951554			-0.0284866	0.0399079	0.0723015	0.150718
	0.100406	-0.0847873	0.00929578	-0.096704			-0.015033	0.0266384	0.0510399	0.134653
	0.09561	-0.110117	-0.0175545	-0.104123			-0.0081071	0.0078864	0.0296244	0.147204
	0.0823195	-0.108565	-0.0551121	-0.0939906			-0.0173085	-0.0041828	0.0215288	0.172561
	0.0869109	-0.0899115	-0.0627874	-0.0536964			-0.0251775	-0.00972687	0.028184	0.177033
	0.107149	-0.0722582	-0.0509236	-0.0159962			-0.0124374	-0.0156334	0.0334823	0.157632
	0.114732	-0.0578948	-0.0356334	-0.00586145			0.0205933	-0.0247376	0.0228532	0.133249
	0.111559	-0.0537003	-0.0140251	-0.0143685			0.0372788	-0.0390257	0.00447977	0.113932
	0.114581	-0.0635257	0.00575287	-0.0393435			0.00287564	-0.0571432	-0.00233827	0.103338
	0.126712	-0.0662888	0.0174156	-0.079452			-0.0558272	-0.0702035	0.00967746	0.0981304
	0.144972	-0.0554029	0.0336645	-0.105779			-0.0764459	-0.0736113	0.0339686	0.0837273
	0.167653	-0.0552005	0.0486722	-0.102012			-0.0406892	-0.0715161	0.0551582	0.0533036
	0.168613	-0.0727708	0.033088	-0.0938323			0.00845963	-0.0695139	0.0591794	0.0299016
	0.139428	-0.0923965	-0.00818017	-0.0960256			0.0167303	-0.0696998	0.0507312	0.0287294
	0.10827	-0.11342	-0.0345834	-0.0904756			-0.0299697	-0.0752952	0.0444588	0.0280455
	0.0946016	-0.135827	-0.0266561	-0.0830187			-0.0936478	-0.0845916	0.0456731	0.0217109
	0.0886901	-0.145078	-0.00135238	-0.0922436			-0.119808	-0.094296	0.0459075	0.0321338
	0.086681	-0.139467	0.0274094	-0.0998758			-0.0900122	-0.108812	0.0368748	0.0524306
	0.0898014	-0.130298	0.0514602	-0.0909127			-0.0331459	-0.136172	0.0177244	0.0584852
	0.0888192	-0.106657	0.0592785	-0.0818005			0.00541561	-0.170025	-0.00221472	0.0536398
	0.0800173	-0.0660684	0.0571231	-0.0680558			0.0125694	-0.190875	-0.00845451	0.0444587
	0.0759161	-0.0347401	0.0619456	-0.0380835			0.0108036	-0.192695	0.00255464	0.0254049
	0.0785414	-0.0296908	0.0636242	-0.0230336			0.023916	-0.190758	0.0153309	0.0175202
	0.0728298	-0.0407215	0.0408084	-0.0436507			0.0411267	-0.197953	0.0140769	0.046829
	0.0601678	-0.0574387	0.0077809	-0.0670589			0.0288021	-0.208215	0.00686083	0.100111
	0.0605677	-0.0753335	-0.0104772	-0.076773			-0.0288572	-0.209683	0.0161483	0.155468
	0.0846321	-0.0857825	-0.0161046	-0.0892695			-0.104046	-0.195998	0.0476408	0.204619
	0.121403	-0.0901577	-0.0108373	-0.0970702			-0.147666	-0.175609	0.0824415	0.229062
	0.15888	-0.103228	0.0118701	-0.0827952			-0.141368	-0.163198	0.1005	0.21345
	0.181306	-0.123707	0.0303766	-0.0653393			-0.117908	-0.156332	0.0959822	0.174582
	0.179545	-0.129652	0.0215492	-0.0592945			-0.124006	-0.148178	0.0763286	0.1444
	0.162675	-0.115686	0.00972333	-0.0486174			-0.154168	-0.140883	0.0577448	0.134704
	0.149141	-0.097608	0.0212174	-0.0405285			-0.156018	-0.135138	0.0532564	0.139164
	0.134155	-0.0841582	0.0339665	-0.0607054			-0.103195	-0.128718	0.0571733	0.15415
	0.108716	-0.0720081	0.0302456	-0.0908838			-0.0326103	-0.125829	0.0514893	0.171169
	0.0852387	-0.0637351	0.0235324	-0.0940729			0.000775547	-0.128678	0.0379024	0.179088
	0.0866838	-0.0608902	0.0153498	-0.0822447			-0.0279212	-0.125907	0.0343412	0.190001
	0.111177	-0.0602228	0.00564012	-0.074962			-0.0916008	-0.116126	0.0442725	0.226153
	0.137503	-0.0696788	0.0211538	-0.0590989			-0.123755	-0.111531	0.0542558	0.277371
	0.148324	-0.0983918	0.058543	-0.0394051			-0.0892102	-0.12009	0.053931	0.315047
	0.135314	-0.128598	0.0732217	-0.0342832			-0.0280577	-0.138904	0.0370088	0.323588
	0.0936732	-0.138791	0.0638363	-0.0249765			0.00892342	-0.16097	0.00316065	0.297115
	0.0459659	-0.136345	0.063459	0.00282562			0.0153126	-0.175077	-0.0245353	0.240353
	0.025149	-0.139055	0.0622132	0.0169474			0.0145362	-0.175123	-0.0298946	0.183644
	0.0346955	-0.144233	0.044904	-0.000571457			0.0287407	-0.170784	-0.0258522	0.158695
	0.0512782	-0.145731	0.035472	-0.0237811			0.0548475	-0.174735	-0.0232732	0.170864
	0.0593346	-0.146749	0.0382697	-0.0416935			0.0551964	-0.182433	-0.00976958	0.20942
	0.050222	-0.14221	0.0307417	-0.0569179			0.0119991	-0.180347	0.0173376	0.258747
	0.0250582	-0.124226	0.0284196	-0.050254			-0.0348292	-0.172382	0.0408618	0.298994
	0.0104633	-0.113234	0.0492553	-0.0157278			-0.0379268	-0.171707	0.0507238	0.315394
	0.0247139	-0.125277	0.0612441	0.0119121			-0.0060261	-0.178096	0.0411524	0.312878
	0.0493305	-0.143772	0.0438611	0.0146887			0.0159755	-0.183185	0.010653	0.310952
	0.06166	-0.157637	0.0226138	0.0156802			0.00325397	-0.176242	-0.0215353	0.314658
	0.0610174	-0.177675	0.0127981	0.0187666			-0.031069	-0.149511	-0.0274684	0.320578
	0.0514729	-0.201198	0.0103907	0.00293395			-0.0450146	-0.110144	-0.00258059	0.335224
	0.0456982	-0.215849	0.0241224	-0.0256899			-0.0116483	-0.0784403	0.0327255	0.35032
	0.0593216	-0.230035	0.0412727	-0.050803			0.0421365	-0.0653194	0.056784	0.348359
	0.0854414	-0.240412	0.0233642	-0.0869914			0.0597978	-0.0617284	0.0565038	0.335946
	0.0964184	-0.224463	-0.0214343	-0.138135			0.0303147	-0.0594312	0.0407115	0.327849
	0.0953326	-0.18849	-0.0408307	-0.17499			-0.00620416	-0.0634414	0.035379	0.315743
	0.104422	-0.162299	-0.0256264	-0.187332			-0.0199627	-0.0825616	0.0520582	0.295025
	0.12387	-0.151778	-0.00548849	-0.179861			-0.0106915	-0.114758	0.0722687	0.274647
	0.134585	-0.148344	0.01052	-0.143833			0.00254086	-0.144467	0.0728419	0.249195
	0.13323	-0.15355	0.0243226	-0.0961105			-0.00881625	-0.15832	0.0539861	0.218408
	0.117025	-0.160908	0.0321627	-0.0844744			-0.0409724	-0.155307	0.0329343	0.210422
	0.0942025	-0.158333	0.0503287	-0.115667			-0.0476237	-0.144161	0.0300655	0.238479
	0.0877281	-0.158237	0.0856809	-0.146703			-0.00860664	-0.139276	0.0432796	0.280316
	0.0999718	-0.172861	0.100922	-0.160322			0.0344573	-0.140999	0.0437138	0.319886
	0.104027	-0.185132	0.0672424	-0.168368			0.0397607	-0.132928	0.0114571	0.35606
	0.0985476	-0.181455	0.015584	-0.171938			0.00907341	-0.105547	-0.0341272	0.373197
	0.104784	-0.177915	-0.0127136	-0.176823			-0.0227405	-0.0685125	-0.0607094	0.356891
	0.119197	-0.176576	-0.014886	-0.197269			-0.0235903	-0.0394303	-0.060666	0.318692
	0.128048	-0.170611	-0.00884942	-0.211111			0.00330136	-0.0320315	-0.0494744	0.271914
	0.128597	-0.171382	-0.0113802	-0.185014			0.0120889	-0.0476881	-0.0492246	0.215368
	0.108631	-0.185499	-0.0294197	-0.137891			-0.0262222	-0.0709063	-0.0686278	0.174573
	0.0580583	-0.194839	-0.0447906	-0.103828			-0.0831305	-0.0855633	-0.0874106	0.184085
	0.00495015	-0.193075	-0.0222227	-0.0815995			-0.100005	-0.0910577	-0.0769246	0.231593
	-0.0156818	-0.192076	0.0348765	-0.0808934			-0.0553815	-0.0943469	-0.0379236	0.288065
	-0.00412608	-0.190208	0.0756869	-0.126683			0.00803108	-0.0966618	0.000350485	0.342071
	0.0149858	-0.190233	0.0728065	-0.193812			0.0283129	-0.0943619	0.013634	0.373579
	0.0338554	-0.20831	0.0509961	-0.237418			-0.0150824	-0.085879	0.0030248	0.360065
	0.0524174	-0.234011	0.0344718	-0.262889			-0.081627	-0.0742227	-0.00817782	0.319476
	0.0707914	-0.239741	0.025521	-0.281223			-0.111091	-0.0677406	0.000821841	0.279209
	0.0917768	-0.231406	0.0266918	-0.277202			-0.0885785	-0.0677302	0.0250889	0.234624
	0.112142	-0.227437	0.0276655	-0.263964			-0.0609981	-0.0673424	0.039965	0.185682
	0.107037	-0.219241	0.00516018	-0.270693			-0.0711006	-0.0595537	0.0300295	0.157603
	0.0738548	-0.197596	-0.0226486	-0.286047			-0.0999937	-0.0482022	0.00491809	0.162641
	0.0491685	-0.183246	-0.0123865	-0.291598			-0.0914007	-0.0441326	-0.0124775	0.189341
	0.0618192	-0.19052	0.0292876	-0.304034			-0.024931	-0.0485097	-0.0127286	0.220433
	0.093982	-0.205502	0.0625029	-0.320921			0.0511398	-0.0578356	-0.0114787	0.240916
	0.116351	-0.215014	0.0797941	-0.310783			0.069452	-0.0670858	-0.0240639	0.238903
	0.115774	-0.218478	0.0829854	-0.276796			0.0171523	-0.0704021	-0.040881	0.222456
	0.0978294	-0.209787	0.0686028	-0.242935			-0.0569694	-0.069618	-0.0412785	0.215808
	0.0738706	-0.191885	0.065483	-0.201407			-0.090956	-0.0758829	-0.0232612	0.221156
	0.0557555	-0.18123	0.101218	-0.148123			-0.0679747	-0.0908124	0.000600262	0.216136
	0.0449494	-0.182079	0.141393	-0.117509			-0.0300621	-0.0990829	0.00914476	0.202372
	0.040066	-0.18128	0.150431	-0.122295			-0.0327763	-0.0901251	-0.0155021	0.201476
	0.0467208	-0.179986	0.152002	-0.132434			-0.0722493	-0.0673804	-0.0606165	0.217154
	0.0766738	-0.183408	0.163568	-0.142511			-0.0998119	-0.0413433	-0.0858849	0.241034
	0.125703	-0.177713	0.165575	-0.164662			-0.0857883	-0.0241632	-0.0800598	0.265623
	0.16766	-0.154823	0.158907	-0.17974			-0.0427806	-0.021638	-0.0728749	0.275735
	0.186557	-0.134296	0.152278	-0.17016			-0.00598037	-0.0268298	-0.0786644	0.263753
	0.178839	-0.129427	0.128788	-0.150725			-0.000213506	-0.031652	-0.0844452	0.247908
	0.146466	-0.132833	0.0988705	-0.119128			-0.00825766	-0.0425376	-0.0798078	0.245044
	0.110434	-0.141649	0.100609	-0.0548912			0.00783316	-0.0695265	-0.0615578	0.248616
	0.100163	-0.158585	0.114737	0.0179391			0.0439988	-0.109119	-0.0350015	0.250803
	0.108728	-0.171193	0.0897565	0.05238			0.0587193	-0.140147	-0.0204838	0.256186
	0.110379	-0.165357	0.0351978	0.0403231			0.0316981	-0.146326	-0.0300055	0.264608
	0.0989578	-0.154988	-0.0107008	-0.003579			-0.0163591	-0.130493	-0.0406716	0.271167
	0.0893379	-0.152636	-0.0388771	-0.0721615			-0.0483648	-0.106615	-0.030685	0.280219
	0.09136	-0.148542	-0.0420206	-0.137652			-0.0424708	-0.0915354	-0.0100504	0.296916
	0.114318	-0.141569	-0.0203898	-0.160704			-0.0166376	-0.0916018	0.00174121	0.307009
	0.145362	-0.139095	-0.0147641	-0.15107			-0.0167207	-0.0944843	-0.00555638	0.298574
	0.157842	-0.132518	-0.0467616	-0.143048			-0.0559211	-0.0860944	-0.03042	0.28395
	0.145254	-0.117765	-0.0751644	-0.13466			-0.0946759	-0.0731505	-0.0569271	0.272672
	0.139124	-0.111378	-0.0656444	-0.116057			-0.0965943	-0.0767702	-0.0633936	0.269157
	0.153065	-0.115282	-0.0351751	-0.105034			-0.0666489	-0.104017	-0.0563863	0.288235
	0.164489	-0.112905	-0.002968	-0.101792			-0.031409	-0.141306	-0.0588958	0.326546
	0.149163	-0.110732	0.0210977	-0.0799615			-0.0102599	-0.167864	-0.0769971	0.356235
	0.113613	-0.120687	0.0203346	-0.047156			-0.0105731	-0.168455	-0.0985616	0.366757
	0.0853466	-0.133048	0.00247101	-0.0202297			-0.0134825	-0.144818	-0.10836	0.365189
	0.0991194	-0.141864	0.00518522	0.0160908			0.00156748	-0.116258	-0.0971536	0.341503
	0.157623	-0.159989	0.0324803	0.064484			0.0211053	-0.101749	-0.0723525	0.296566
	0.206186	-0.182536	0.0486623	0.0979823			0.0142732	-0.100058	-0.0552498	0.267536
	0.197003	-0.19052	0.0424578	0.113138			-0.0164478	-0.0976314	-0.0497354	0.280068
	0.151452	-0.182676	0.0350112	0.127077			-0.0480974	-0.0954309	-0.0413369	0.322594
	0.117399	-0.170559	0.0362021	0.13289			-0.0620942	-0.105068	-0.0254055	0.379448
	0.113717	-0.153872	0.0370041	0.12505			-0.0529207	-0.129828	-0.0107443	0.430637
	0.138269	-0.134891	0.0315652	0.122763			-0.0393028	-0.164411	-0.00625236	0.439722
	0.171322	-0.125126	0.0130425	0.120086			-0.0489655	-0.19069	-0.015924	0.397998
	0.188261	-0.118624	-0.0185594	0.0902494			-0.0772491	-0.188919	-0.0312948	0.343854
	0.192131	-0.104892	-0.0341812	0.0479636			-0.0886984	-0.164817	-0.0296807	0.308074
	0.210688	-0.0950351	-0.00618442	0.0298579			-0.0679183	-0.145381	-0.00575696	0.287014
	0.236927	-0.0973856	0.0428558	0.0335336			-0.0412192	-0.140895	0.0149815	0.28375
	0.245399	-0.106514	0.06776	0.0481104			-0.0397966	-0.140649	0.00777921	0.303753
	0.235946	-0.124949	0.0601342	0.0833495			-0.0590099	-0.131947	-0.024757	0.327684
	0.232902	-0.154328	0.0367211	0.121074			-0.0675288	-0.114026	-0.060426	0.349614
	0.241304	-0.17359	0.0041475	0.131484			-0.0500321	-0.0995889	-0.0761703	0.384153
	0.252086	-0.167491	-0.0212204	0.134856			-0.0219644	-0.106064	-0.0672787	0.418385
	0.255908	-0.150099	-0.0235849	0.156285			-0.0119083	-0.129956	-0.052234	0.428063
	0.247532	-0.133997	-0.0202232	0.170272			-0.0369588	-0.148149	-0.0515155	0.422381
	0.226542	-0.120938	-0.021086	0.165358			-0.076076	-0.151363	-0.0669303	0.420065
	0.216746	-0.119098	0.00638109	0.165189			-0.0881905	-0.149126	-0.0806046	0.413713
	0.237705	-0.133903	0.0725548	0.161893			-0.0645289	-0.150952	-0.0752618	0.399119
	0.273404	-0.149518	0.130848	0.132889			-0.0448552	-0.158416	-0.0524856	0.384891
	0.289503	-0.152932	0.145408	0.0959061			-0.06759	-0.164751	-0.0336009	0.368104
	0.280352	-0.152346	0.118488	0.0708083			-0.130739	-0.161891	-0.0339954	0.346917
	0.258894	-0.155085	0.0584215	0.0479801			-0.187036	-0.150104	-0.0525296	0.343229
	0.237112	-0.151918	-0.000661065	0.0361795			-0.187398	-0.149042	-0.0805116	0.373915
	0.225988	-0.146761	-0.00704035	0.0590849			-0.121782	-0.174458	-0.103568	0.421782
	0.229826	-0.154284	0.025354	0.0911591			-0.0367246	-0.209436	-0.110377	0.457946
	0.235694	-0.168334	0.0324014	0.0953764			0.00961163	-0.227396	-0.106609	0.469064
	0.237684	-0.174333	0.00787231	0.0858645			0.00869788	-0.220823	-0.104313	0.450696
	0.244331	-0.173304	-0.00439975	0.0847895			-0.0054151	-0.19923	-0.0962826	0.406478
	0.262692	-0.163804	0.00454692	0.0813084			-0.0103103	-0.175898	-0.0749294	0.356752
	0.273112	-0.140485	0.0240122	0.0776859			-0.0107412	-0.163295	-0.0590407	0.319853
	0.252562	-0.120226	0.0466135	0.0979766			-0.0139511	-0.156313	-0.0658502	0.300206
	0.207595	-0.11946	0.0389506	0.133982			-0.0188971	-0.141572	-0.0892415	0.306465
	0.153853	-0.121255	-0.0147048	0.171422			-0.0137047	-0.124379	-0.115645	0.341894
	0.108587	-0.109098	-0.0585621	0.228536			0.0178775	-0.123628	-0.131136	0.377412
	0.0913432	-0.0997943	-0.0522432	0.301168			0.0563727	-0.138612	-0.114172	0.375428
	0.100893	-0.104981	-0.0324254	0.343704			0.0536226	-0.151555	-0.0673971	0.333445
	0.107259	-0.114968	-0.0300832	0.339488			-0.00169615	-0.150806	-0.0310455	0.281612
	0.112749	-0.130397	-0.0316595	0.31095			-0.0639347	-0.139011	-0.0295468	0.243371
	0.137706	-0.152748	-0.0340114	0.264778			-0.0853635	-0.129472	-0.0440065	0.225793
	0.175313	-0.159608	-0.0380935	0.203824			-0.0547816	-0.133139	-0.0455494	0.224408
	0.198146	-0.134927	-0.0270706	0.154214			-0.000636569	-0.146438	-0.0292857	0.218594
	0.198698	-0.101583	-0.0134748	0.125833			0.028215	-0.157237	-0.00969193	0.192332
	0.173132	-0.083936	-0.032332	0.101433			0.0157394	-0.154641	-0.0121148	0.158394
	0.129943	-0.0806597	-0.0658591	0.0866818			-0.00287896	-0.143862	-0.0451558	0.134199
	0.100144	-0.0945757	-0.0706574	0.106653			0.0100346	-0.139997	-0.0830966	0.113869
	0.105397	-0.12048	-0.0543225	0.143773			0.039227	-0.145618	-0.0955564	0.0929135
	0.133105	-0.134588	-0.0457482	0.164801			0.0503078	-0.147887	-0.0842533	0.0824078
	0.168825	-0.134748	-0.0429801	0.173089			0.0287938	-0.136927	-0.0751731	0.0760395
	0.203889	-0.147277	-0.0408044	0.179228			-0.0120629	-0.11875	-0.082728	0.0662232
	0.219302	-0.172536	-0.0414484	0.173073			-0.0475174	-0.107683	-0.10064	0.0644796
	0.206583	-0.188153	-0.0280217	0.162646			-0.057109	-0.113141	-0.109266	0.0697843
	0.183432	-0.192559	0.00380598	0.168649			-0.0496283	-0.134326	-0.0944066	0.0700923
	0.160007	-0.191802	0.0176567	0.175462			-0.0512163	-0.160466	-0.0695393	0.080002
	0.130008	-0.183786	-0.00588658	0.167578			-0.0632125	-0.179614	-0.0628877	0.11332
	0.108831	-0.179297	-0.0340881	0.165983			-0.0602209	-0.18952	-0.0827313	0.140909
	0.118904	-0.189232	-0.0356787	0.174654			-0.0312647	-0.193301	-0.110372	0.131436
	0.15267	-0.197177	-0.0127141	0.175037			0.010961	-0.192468	-0.127472	0.0919058
	0.186266	-0.190644	0.01697	0.176259			0.0441943	-0.183548	-0.130634	0.0418734
	0.209163	-0.185149	0.0253897	0.18908			0.0484412	-0.172329	-0.132918	-0.00584238
	0.207706	-0.188801	-0.00787591	0.186795			0.0279544	-0.165265	-0.147926	-0.0280116
	0.189124	-0.18996	-0.0563582	0.159855			0.0151417	-0.160606	-0.16434	-0.00891133
	0.179069	-0.185856	-0.066573	0.145233			0.0297707	-0.15869	-0.156854	0.0323027
	0.17986	-0.186843	-0.029995	0.161764			0.0524175	-0.163038	-0.122964	0.0766305
	0.159691	-0.194475	0.00518464	0.193866			0.04843	-0.165938	-0.0897157	0.123593
	0.120225	-0.210396	0.00690535	0.234835			0.0123869	-0.163355	-0.0809624	0.155274
	0.0931408	-0.23985	-0.0100407	0.276234			-0.0204024	-0.16158	-0.0975541	0.148873
	0.094266	-0.263457	-0.0205942	0.288182			-0.0169373	-0.161718	-0.122218	0.125976
	0.113981	-0.257655	-0.0118285	0.268593			0.0194265	-0.159526	-0.135838	0.119317
	0.144873	-0.23253	0.0153131	0.248448			0.0541053	-0.154868	-0.133386	0.11464
	0.17564	-0.213475	0.033383	0.225152			0.057548	-0.1459	-0.128715	0.0934736
	0.200025	-0.206197	0.0113859	0.177776			0.0245968	-0.134901	-0.1364	0.0666175
	0.225155	-0.2086	-0.0283969	0.129486			-0.0156673	-0.133486	-0.151361	0.0424833
	0.263582	-0.218471	-0.0416183	0.102059			-0.0362413	-0.145614	-0.154233	0.0280934
	0.305625	-0.225169	-0.0355681	0.077292			-0.045811	-0.154385	-0.137021	0.0424318
	0.321842	-0.223081	-0.0418258	0.0574479			-0.0700422	-0.146609	-0.11413	0.0867256
	0.300798	-0.224598	-0.0590103	0.0670133			-0.104956	-0.127849	-0.104198	0.133473
	0.265983	-0.232315	-0.0730996	0.0863362			-0.12295	-0.112254	-0.117555	0.159286
	0.248243	-0.231458	-0.0734198	0.0892875			-0.101794	-0.116402	-0.151449	0.154176
	0.255574	-0.21983	-0.0409052	0.089905			-0.0478112	-0.143388	-0.186879	0.109953
	0.2768	-0.216225	0.013766	0.0887957			7.50135e-05	-0.177605	-0.199556	0.0352444
	0.287916	-0.233752	0.0316389	0.0616515			-0.00283838	-0.196607	-0.189019	-0.0345298
	0.274547	-0.263135	-0.00637743	0.0202361			-0.0529244	-0.200034	-0.185139	-0.0701487
	0.249172	-0.292759	-0.0450063	-0.000657123			-0.0940781	-0.201889	-0.204965	-0.0740584
	0.239151	-0.316345	-0.0474416	-0.00745875			-0.0846892	-0.20242	-0.230889	-0.0588618
	0.243398	-0.318972	-0.0316234	-0.0196262			-0.0490296	-0.194256	-0.240421	-0.0284532
	0.245764	-0.295778	-0.0145877	-0.0228246			-0.0363203	-0.181025	-0.228936	0.00458319
	0.24731	-0.269867	-0.00905176	-0.00667774			-0.0672544	-0.163534	-0.203959	0.027283
	0.259259	-0.258571	-0.0316222	0.0130175			-0.118833	-0.140512	-0.18448	0.045304
	0.265122	-0.254367	-0.0516941	0.0340024			-0.143405	-0.120466	-0.1877	0.0617145
	0.251263	-0.253061	-0.0213768	0.0620481			-0.116303	-0.10857	-0.198584	0.0578745
	0.224658	-0.257658	0.0288344	0.0654351			-0.0700717	-0.0973553	-0.191501	0.0274788
	0.197326	-0.261059	0.0324116	0.0213986			-0.0534716	-0.0895724	-0.170455	-0.0139388
	0.170858	-0.263824	-0.00808304	-0.0311857			-0.0659057	-0.0960908	-0.157422	-0.0558478
	0.160728	-0.279185	-0.0491663	-0.0572148			-0.081585	-0.116194	-0.155239	-0.0913646
	0.166964	-0.295505	-0.0682549	-0.0678027			-0.0841931	-0.138916	-0.155534	-0.111866
	0.164235	-0.285937	-0.0479784	-0.0704732			-0.0734297	-0.156922	-0.149639	-0.121659
	0.147821	-0.262146	-0.00110708	-0.0642699			-0.0606645	-0.162968	-0.127705	-0.136964
	0.142473	-0.252807	0.0125786	-0.0750785			-0.0663859	-0.1552	-0.0995689	-0.15923
	0.154921	-0.255951	-0.0254217	-0.107472			-0.0805907	-0.140711	-0.0911128	-0.166863
	0.174552	-0.25407	-0.0555836	-0.123274			-0.0734152	-0.126381	-0.107248	-0.150502
	0.191499	-0.246558	-0.0391986	-0.107896			-0.0400737	-0.113721	-0.119953	-0.11817
	0.189068	-0.234661	-0.00403803	-0.0870033			-0.00619315	-0.0997343	-0.109712	-0.0787801
	0.163936	-0.218143	0.0212691	-0.0735125			0.00510349	-0.088495	-0.0900639	-0.0495475
	0.14879	-0.217347	0.0272094	-0.0675755			-0.0121407	-0.0903809	-0.0877905	-0.0542248
	0.16281	-0.23811	0.00847414	-0.0867866			-0.0404929	-0.106657	-0.119931	-0.094725
	0.177315	-0.250411	-0.0130774	-0.130811			-0.0461096	-0.129135	-0.176738	-0.154964
	0.166038	-0.24199	-0.00815219	-0.164461			-0.0183681	-0.150345	-0.226717	-0.23331
	0.132572	-0.235744	0.000764795	-0.175764			0.00556315	-0.162243	-0.245578	-0.315805
	0.0962143	-0.240847	-0.0263703	-0.186692			-0.00661654	-0.162597	-0.240267	-0.362729
	0.08151	-0.249197	-0.0704135	-0.198925			-0.04117	-0.155613	-0.230812	-0.364725
	0.108654	-0.262557	-0.08157	-0.196211			-0.0652994	-0.151893	-0.22558	-0.348868
	0.146851	-0.272663	-0.0527769	-0.191603			-0.0669453	-0.155287	-0.22368	-0.324357
	0.152157	-0.263959	-0.0154265	-0.197912			-0.0524334	-0.161045	-0.217696	-0.289832
	0.128908	-0.249854	-0.00148591	-0.199311			-0.0435118	-0.161254	-0.200613	-0.261621
	0.118669	-0.253001	-0.0291461	-0.200503			-0.0603839	-0.155781	-0.175821	-0.243686
	0.12813	-0.262134	-0.0791519	-0.219035			-0.0854203	-0.149898	-0.157437	-0.223266
	0.143928	-0.261718	-0.0949603	-0.235142			-0.0826363	-0.150154	-0.151592	-0.205446
	0.151372	-0.263028	-0.058524	-0.230132			-0.0496657	-0.158182	-0.154555	-0.202804
	0.132287	-0.26981	-0.0225508	-0.22374			-0.0199426	-0.167885	-0.160644	-0.204963
	0.0870444	-0.273671	-0.0337452	-0.217581			-0.0226951	-0.166037	-0.164051	-0.202386
	0.058536	-0.273944	-0.0701509	-0.189132			-0.0639968	-0.152825	-0.16815	-0.211383
	0.0672071	-0.268338	-0.0842883	-0.153017			-0.10835	-0.140371	-0.181654	-0.230982
	0.0847561	-0.243549	-0.0596071	-0.139851			-0.115262	-0.135942	-0.201736	-0.240109
	0.0827829	-0.208158	-0.00768071	-0.146454			-0.0852756	-0.138207	-0.210887	-0.242085
	0.06295	-0.192811	0.0354417	-0.168429			-0.0537836	-0.141955	-0.201704	-0.251781
	0.034599	-0.201844	0.0318297	-0.214808			-0.0396936	-0.138999	-0.188558	-0.258196
	0.0172613	-0.218327	-0.0066734	-0.261085			-0.03505	-0.133193	-0.188283	-0.253175
	0.0328902	-0.24099	-0.0250296	-0.267286			-0.0261672	-0.135935	-0.200095	-0.255542
	0.0675872	-0.271225	-0.00812236	-0.245388			-0.0226015	-0.145458	-0.210359	-0.263751
	0.0865276	-0.298316	0.00540602	-0.227225			-0.0506183	-0.153567	-0.210675	-0.254266
	0.0841734	-0.320569	-0.00458896	-0.207405			-0.115578	-0.153421	-0.205924	-0.230165
	0.0850086	-0.340646	-0.0266123	-0.178518			-0.183171	-0.145366	-0.205516	-0.206828
	0.0955355	-0.343715	-0.0484694	-0.160399			-0.213876	-0.133084	-0.20943	-0.184637
	0.102615	-0.320158	-0.0491663	-0.152025			-0.195455	-0.124526	-0.208855	-0.170767
	0.0970891	-0.290251	-0.0181679	-0.13834			-0.151333	-0.121795	-0.189048	-0.175359
	0.0927041	-0.272127	-0.00079668	-0.145627			-0.116606	-0.121117	-0.146856	-0.184775
	0.102107	-0.2592	-0.0409386	-0.190318			-0.109714	-0.122697	-0.107589	-0.177881
	0.128908	-0.244662	-0.0985975	-0.235886			-0.111449	-0.130414	-0.104212	-0.156241
	0.154183	-0.232675	-0.11213	-0.267147			-0.0926658	-0.142822	-0.138562	-0.130833
	0.148512	-0.226021	-0.0853167	-0.305133			-0.058032	-0.155097	-0.185527	-0.0999085
	0.0987875	-0.230908	-0.0541256	-0.334712			-0.040115	-0.163584	-0.224234	-0.0634401
	0.0434741	-0.261353	-0.0426101	-0.320777			-0.0542133	-0.169977	-0.238486	-0.0376579
	0.0373885	-0.315083	-0.0711414	-0.275368			-0.0823794	-0.169339	-0.227998	-0.0320033
	0.0971734	-0.361705	-0.11934	-0.222496			-0.0960163	-0.161121	-0.218648	-0.0430519
	0.173598	-0.380505	-0.119303	-0.162428			-0.0705059	-0.151687	-0.226606	-0.0706899
	0.209758	-0.379278	-0.0590983	-0.12043			-0.0242424	-0.141299	-0.230301	-0.109848
	0.184939	-0.362216	-0.00897158	-0.134991			-0.0135269	-0.125376	-0.211712	-0.134996
	0.123616	-0.325213	-0.00636444	-0.190583			-0.069415	-0.113978	-0.184101	-0.128168
	0.071383	-0.283772	-0.0218648	-0.235748			-0.148691	-0.117487	-0.162557	-0.099652
	0.0539292	-0.25575	-0.0311636	-0.257101			-0.189731	-0.132795	-0.156042	-0.0673229
	0.0502924	-0.239933	-0.0266999	-0.263744			-0.168609	-0.151621	-0.175104	-0.0492593
	0.0296971	-0.238319	-0.00465439	-0.250851			-0.116391	-0.167573	-0.217331	-0.0656742
	0.00210625	-0.262208	0.0044556	-0.22681			-0.0950123	-0.178068	-0.257529	-0.107163
	-0.00181524	-0.299355	-0.0299164	-0.210164			-0.130293	-0.186126	-0.277384	-0.135525
	0.0233805	-0.321661	-0.0647848	-0.186087			-0.16983	-0.199516	-0.276867	-0.125512
	0.0626128	-0.3285	-0.0470567	-0.141094			-0.155362	-0.215802	-0.256732	-0.0830974
	0.0904488	-0.331117	0.00169231	-0.108164			-0.101764	-0.220983	-0.225454	-0.0324091
	0.0805054	-0.32907	0.0356006	-0.106379			-0.0680921	-0.208951	-0.203311	0.000159994
	0.0444206	-0.326823	0.0430936	-0.107599			-0.0874042	-0.193809	-0.204915	-0.0103278
	0.0226157	-0.333543	0.0239743	-0.103045			-0.147564	-0.187824	-0.225242	-0.060664
	0.0342599	-0.340116	-0.00915393	-0.11723			-0.197799	-0.18098	-0.251088	-0.114047
	0.0627639	-0.331678	-0.0181256	-0.151254			-0.196758	-0.159931	-0.264361	-0.14157
	0.0941095	-0.318463	-0.000289366	-0.184576			-0.158402	-0.137967	-0.249838	-0.141138
	0.116351	-0.308362	-0.00564437	-0.213438			-0.131654	-0.131996	-0.21701	-0.113636
	0.129757	-0.289007	-0.0524478	-0.230325			-0.132369	-0.144541	-0.189974	-0.067949
	0.146276	-0.263378	-0.0971792	-0.220125			-0.136281	-0.164192	-0.181115	-0.0389024
	0.163183	-0.253295	-0.103524	-0.201517			-0.125922	-0.174682	-0.186063	-0.0471335
	0.143168	-0.261211	-0.0748848	-0.199858			-0.103041	-0.168972	-0.196852	-0.0696306
	0.0816771	-0.27677	-0.033445	-0.1973			-0.0833287	-0.159501	-0.203886	-0.0872835
	0.0229334	-0.302432	-0.0119402	-0.171075			-0.0898266	-0.158233	-0.20716	-0.0953083
	0.004996	-0.329386	-0.029508	-0.141484			-0.126429	-0.164931	-0.220698	-0.0794067
	0.0207648	-0.340312	-0.052036	-0.126035			-0.152994	-0.171615	-0.245717	-0.0442838
	0.0487484	-0.340513	-0.028555	-0.112203			-0.139935	-0.17932	-0.264538	-0.0249
	0.0631263	-0.343947	0.0278032	-0.102659			-0.102872	-0.190685	-0.265784	-0.030181
	0.0554025	-0.343414	0.0563154	-0.107637			-0.0762692	-0.205933	-0.253292	-0.0440219
	0.0532838	-0.33418	0.0361411	-0.106462			-0.0699639	-0.22429	-0.231507	-0.0668173
	0.0873	-0.329288	0.00132441	-0.0912487			-0.0731243	-0.243165	-0.20474	-0.100086
	0.128266	-0.328392	-0.00611871	-0.089173			-0.0635015	-0.254467	-0.179644	-0.11973
	0.128012	-0.323732	0.0310372	-0.103529			-0.0353747	-0.250598	-0.158389	-0.110651
	0.0885078	-0.321961	0.0911136	-0.107923			-0.015798	-0.234775	-0.146734	-0.0904044
	0.0433352	-0.325568	0.118859	-0.102256			-0.0363997	-0.213712	-0.15756	-0.0686737
	0.0181985	-0.32158	0.0816502	-0.0921215			-0.0886334	-0.193243	-0.191428	-0.0433002
	0.0216152	-0.309695	0.0196217	-0.0639739			-0.131831	-0.177002	-0.228952	-0.0319708
	0.0446944	-0.307434	-0.0116525	-0.0382047			-0.13296	-0.16576	-0.254	-0.045128
	0.0579548	-0.313999	-0.0175231	-0.0608068			-0.103462	-0.157586	-0.264628	-0.058765
	0.055872	-0.313796	-0.0302632	-0.117993			-0.0772727	-0.161876	-0.264976	-0.0566595
	0.0601033	-0.307314	-0.053147	-0.15331			-0.0743838	-0.183003	-0.260183	-0.0522263
	0.0807711	-0.296672	-0.075148	-0.15044			-0.0809763	-0.207391	-0.257084	-0.0481829
	0.0910994	-0.271936	-0.0820912	-0.120098			-0.0709902	-0.22107	-0.260571	-0.038874
	0.0738358	-0.239844	-0.0541286	-0.0654854			-0.0362555	-0.219324	-0.266417	-0.045578
	0.0424676	-0.223312	-0.0115221	-0.0122371			-0.00359997	-0.203228	-0.26726	-0.0790296
	0.0287579	-0.222776	-0.0124566	0.00838019			-0.00901666	-0.186284	-0.260594	-0.11657
	0.0475797	-0.2278	-0.0569786	0.0150013			-0.0472732	-0.184213	-0.251606	-0.145395
	0.0968398	-0.2467	-0.079384	0.0365867			-0.0743501	-0.199525	-0.240846	-0.170408
	0.143737	-0.284851	-0.0580625	0.0537825			-0.0586775	-0.217931	-0.225321	-0.188376
	0.146693	-0.324225	-0.0316115	0.0484839			-0.0218014	-0.234486	-0.212372	-0.196397
	0.101023	-0.353135	-0.0274313	0.0419973			-0.00691583	-0.251321	-0.211907	-0.201255
	0.0531644	-0.371107	-0.0553586	0.0340152			-0.0373274	-0.266944	-0.21854	-0.206005
	0.0322651	-0.369585	-0.111653	0.0068379			-0.0895662	-0.27534	-0.220648	-0.202106
	0.0252827	-0.346938	-0.146669	-0.0201324			-0.118745	-0.275583	-0.217514	-0.185958
	0.012728	-0.323253	-0.114902	-0.0210554			-0.105986	-0.270033	-0.207055	-0.161518
	-0.00751636	-0.311049	-0.0526499	-0.0160882			-0.0878646	-0.263742	-0.191859	-0.130118
	-0.0268728	-0.298921	-0.0134812	-0.023019			-0.107533	-0.265964	-0.189989	-0.0947489
	-0.0303401	-0.284495	0.00820068	-0.0238818			-0.155779	-0.279099	-0.210533	-0.0723319
	-0.0126091	-0.282276	0.0245204	-0.0179134			-0.185276	-0.290863	-0.236566	-0.0778627
	0.00253039	-0.288415	0.0239367	-0.0243525			-0.170509	-0.290767	-0.255777	-0.0990396
	-0.0101574	-0.287615	0.0223336	-0.0348741			-0.127448	-0.283711	-0.27572	-0.113193
	-0.0301315	-0.289163	0.0311	-0.0350371			-0.0985215	-0.276137	-0.294439	-0.117823
	-0.01694	-0.299476	0.0143049	-0.041955			-0.108991	-0.269794	-0.304112	-0.117667
	0.0288221	-0.303355	-0.0351435	-0.0638251			-0.131306	-0.264799	-0.306334	-0.112914
	0.0759053	-0.300011	-0.0623207	-0.0785425			-0.111644	-0.258966	-0.302224	-0.113203
	0.0982151	-0.302528	-0.0415989	-0.0858736			-0.0518627	-0.252088	-0.29044	-0.116086
	0.0889949	-0.303725	-0.00700589	-0.0981503			-0.00924431	-0.248468	-0.28065	-0.103613
	0.0588886	-0.292394	0.0155464	-0.0949217			-0.0286887	-0.251345	-0.281991	-0.0821994
	0.0423637	-0.283407	0.0141843	-0.0634791			-0.0984496	-0.262441	-0.282081	-0.0729439
	0.0448853	-0.285737	-0.0160787	-0.0436308			-0.164246	-0.273655	-0.271434	-0.0699645
	0.0411266	-0.289942	-0.0357162	-0.0616854			-0.174106	-0.278331	-0.25913	-0.0529935
	0.0209522	-0.296544	-0.00157727	-0.0911786			-0.134921	-0.27953	-0.256519	-0.0214252
	0.00203954	-0.306728	0.0556877	-0.112138			-0.11024	-0.286504	-0.266785	0.0171894
	-0.0106763	-0.305624	0.0806117	-0.124085			-0.132298	-0.295266	-0.292567	0.0616245
	-0.010536	-0.286892	0.0760834	-0.12107			-0.165838	-0.297891	-0.326652	0.097147
	0.00245354	-0.271119	0.0712707	-0.111614			-0.16374	-0.293587	-0.346171	0.111609
	0.00496349	-0.271795	0.0723645	-0.124652			-0.130221	-0.286197	-0.338712	0.116637
	-0.0209923	-0.281344	0.0818203	-0.154169			-0.111127	-0.278353	-0.312076	0.12344
	-0.0520486	-0.294057	0.0943257	-0.159272			-0.148977	-0.27824	-0.285147	0.12173
	-0.0696491	-0.307809	0.0807789	-0.133443			-0.231212	-0.284945	-0.273923	0.10982
	-0.0760012	-0.311592	0.0375079	-0.0987184			-0.287119	-0.289601	-0.280512	0.101888
	-0.0711768	-0.30603	0.0128295	-0.0568656			-0.256835	-0.289703	-0.288242	0.0915984
	-0.0530045	-0.306853	0.0359582	-0.0127585			-0.166912	-0.290811	-0.284803	0.0647198
	-0.0355073	-0.308541	0.0769593	0.00765701			-0.0967094	-0.294569	-0.280619	0.0384854
	-0.0237254	-0.29744	0.0975477	0.00416235			-0.0881242	-0.295868	-0.283903	0.0330614
	-0.00943067	-0.285114	0.0913175	0.00329212			-0.111418	-0.294809	-0.289166	0.0440854
	-0.00525129	-0.287124	0.0711231	-0.00152904			-0.119527	-0.294252	-0.289269	0.0792946
	-0.0347026	-0.295603	0.0579467	-0.0232901			-0.097004	-0.294161	-0.282483	0.145424
	-0.0908023	-0.300971	0.0687102	-0.0394863			-0.0780601	-0.298381	-0.272022	0.206567
	-0.134261	-0.304755	0.0840341	-0.0450749			-0.100825	-0.311848	-0.269369	0.229656
	-0.142922	-0.302018	0.0635356	-0.0656364			-0.156358	-0.326495	-0.281412	0.226233
	-0.119685	-0.293994	0.00893909	-0.0901509			-0.182493	-0.335337	-0.293143	0.210902
	-0.0808721	-0.295061	-0.0347875	-0.08812			-0.137884	-0.341735	-0.286509	0.179399
	-0.0480714	-0.30575	-0.0430772	-0.0703759			-0.0575946	-0.350353	-0.266613	0.139885
	-0.0360659	-0.312362	-0.0291207	-0.0529557			-0.0243908	-0.363123	-0.254875	0.101981
	-0.0257485	-0.312521	-0.00895938	-0.0250339			-0.0763392	-0.381244	-0.260253	0.0488
	-0.00402601	-0.314691	0.00350163	0.00251104			-0.163874	-0.394473	-0.272276	-0.019013
	0.0131162	-0.316137	-0.00311649	0.00710725			-0.206627	-0.388428	-0.275741	-0.0640618
	0.00103657	-0.3099	-0.00604474	0.0132746			-0.169918	-0.365231	-0.26547	-0.0587883
	-0.0291665	-0.300981	0.0247559	0.0580374			-0.0998004	-0.342475	-0.248996	-0.00491067
	-0.0525434	-0.292462	0.0646899	0.130408			-0.0683861	-0.325938	-0.241863	0.0885288
	-0.0559461	-0.27519	0.0712529	0.211076			-0.0943121	-0.317559	-0.256442	0.202618
	-0.0470798	-0.251932	0.0556646	0.303304			-0.117858	-0.312299	-0.283864	0.296725
	-0.0369611	-0.237454	0.0506442	0.389007			-0.089076	-0.302339	-0.300129	0.339661
	-0.0380079	-0.227725	0.0618447	0.450097			-0.0294499	-0.290206	-0.290784	0.345474
	-0.0523017	-0.210818	0.0885635	0.515749			0.0039615	-0.290834	-0.265089	0.347811
	-0.0642859	-0.194883	0.125601	0.611221			-0.0115554	-0.30647	-0.240611	0.366043
	-0.0539461	-0.189678	0.138449	0.704967			-0.0511336	-0.318359	-0.228562	0.404992
	-0.0269953	-0.187783	0.118754	0.779285			-0.0671058	-0.315599	-0.229615	0.46574
	0.00237107	-0.191503	0.115371	0.863581			-0.0356369	-0.305218	-0.229963	0.547116
	0.0368626	-0.208702	0.147075	0.963342			0.0201271	-0.292132	-0.213118	0.647473
	0.0721008	-0.22242	0.174393	1.05639			0.0550288	-0.27824	-0.188125	0.755214
	0.0887088	-0.211705	0.180476	1.1447			0.0637278	-0.26653	-0.181062	0.836133
	0.083413	-0.186483	0.180355	1.23087			0.0757025	-0.251613	-0.191313	0.866029
	0.0602461	-0.163742	0.173758	1.29746			0.107289	-0.23051	-0.197416	0.871146
	0.00815789	-0.144892	0.171797	1.35444			0.133589	-0.221551	-0.192931	0.891241
	-0.0597914	-0.13642	0.200631	1.43866			0.122403	-0.243348	-0.180372	0.925791
	-0.100404	-0.15087	0.238458	1.54262			0.0642258	-0.288471	-0.159763	0.952128
	-0.0930914	-0.176584	0.244799	1.62873			-0.00580966	-0.338679	-0.142322	0.960865
	-0.0692388	-0.193109	0.23881	1.69699			-0.0323908	-0.381613	-0.139753	0.967152
	-0.0563449	-0.206753	0.2562	1.77015			-0.00704255	-0.409716	-0.13878	1.00466
	-0.0590515	-0.219692	0.288849	1.85494			0.0142939	-0.415958	-0.12827	1.10084
	-0.0571487	-0.211093	0.327328	1.96844			-0.0122831	-0.400445	-0.116553	1.24254
	-0.0182671	-0.181536	0.377602	2.13269			-0.0638579	-0.358923	-0.105426	1.37903
	0.0704021	-0.148288	0.419635	2.32562			-0.0858358	-0.292597	-0.0846459	1.47969
	0.165595	-0.105558	0.437861	2.5136			-0.035642	-0.212903	-0.0517064	1.56453
	0.224974	-0.0416745	0.464056	2.70679			0.0792952	-0.138609	-0.0151252	1.65912
	0.258942	0.0309165	0.517023	2.92179			0.198839	-0.0809197	0.0154105	1.76507
	0.300024	0.108167	0.563704	3.14032			0.265768	-0.0354957	0.0258854	1.8715
	0.35337	0.194372	0.589679	3.35922			0.290787	0.0084279	0.0133807	1.96297
	0.419437	0.266116	0.621207	3.60085			0.316746	0.0521694	-0.00545342	2.02173
	0.487234	0.304408	0.670345	3.85442			0.354816	0.0932883	-0.0116461	2.05986
	0.536113	0.325496	0.731178	4.0916			0.377713	0.128025	-0.000496182	2.11447
	0.576752	0.346859	0.80277	4.31399			0.357592	0.156944	0.0197059	2.19429
	0.643616	0.366228	0.864369	4.52399			0.299497	0.185666	0.0365886	2.2854
	0.730872	0.388908	0.887612	4.70455			0.258221	0.221542	0.0403772	2.38826
	0.812691	0.421997	0.89071	4.86385			0.285248	0.265295	0.0356509	2.49794
	0.887247	0.45359	0.916012	5.02931			0.367371	0.307023	0.0325291	2.59207
	0.953855	0.477463	0.96879	5.18924			0.435311	0.337705	0.0303459	2.66255
	1.00942	0.511597	1.02957	5.32676			0.457331	0.358277	0.023271	2.70677
	1.06993	0.567343	1.09154	5.46819			0.460681	0.372051	0.0113528	2.704
	1.14776	0.636169	1.14863	5.63081			0.483272	0.37598	0.00355549	2.65504
	1.21843	0.715937	1.19904	5.79746			0.522343	0.368221	0.0107548	2.60392
	1.26927	0.801122	1.26621	5.9671			0.541265	0.355199	0.0426837	2.58392
	1.31941	0.871472	1.36361	6.14724			0.511469	0.346707	0.0921987	2.58455
	1.3823	0.92836	1.45576	6.31467			0.462374	0.350566	0.135036	2.59236
	1.44494	0.993217	1.50436	6.45953			0.457915	0.373435	0.154608	2.60202
	1.49937	1.06728	1.52632	6.61116			0.5207	0.407562	0.154453	2.59061
	1.53776	1.13663	1.5609	6.77076			0.60125	0.439217	0.148171	2.55293
	1.56041	1.20666	1.61881	6.91248			0.623604	0.463906	0.146013	2.51664
	1.59297	1.28369	1.69688	7.04917			0.564844	0.48329	0.148967	2.49202
	1.67234	1.36392	1.78484	7.20148			0.472272	0.496249	0.150534	2.45982
	1.77689	1.45551	1.85734	7.34262			0.41491	0.50625	0.146792	2.42128
	1.85901	1.56507	1.90779	7.45408			0.410499	0.509526	0.139281	2.39191
	1.90742	1.67487	1.97103	7.56002			0.428902	0.501885	0.132873	2.36305
	1.9428	1.76559	2.06173	7.66667			0.433892	0.488142	0.127666	2.33672
	1.97324	1.83913	2.14647	7.76273			0.418686	0.479286	0.116953	2.33659
	2.00073	1.90494	2.2059	7.86431			0.411715	0.47805	0.0972762	2.35554
	2.02685	1.96487	2.25667	7.98008			0.44476	0.481477	0.0825057	2.36926
	2.05771	2.02458	2.30874	8.07694			0.499633	0.490028	0.088029	2.37876
	2.10344	2.09742	2.3704	8.15204			0.52863	0.504012	0.106327	2.39124
	2.17257	2.18437	2.45727	8.2419			0.516685	0.521707	0.117621	2.39648
	2.25986	2.27769	2.5443	8.33497			0.496436	0.543494	0.108349	2.38991
	2.34312	2.37929	2.58705	8.39537			0.495492	0.563992	0.0752172	2.37925
	2.4002	2.48414	2.60134	8.44219			0.512558	0.573478	0.0324238	2.36279
	2.43472	2.56947	2.62893	8.50463			0.515927	0.567058	0.013253	2.33417
	2.47114	2.63055	2.65752	8.574			0.482442	0.553549	0.0334038	2.30186
	2.51509	2.68914	2.66591	8.65319			0.42993	0.540981	0.0641044	2.27221
	2.5605	2.75482	2.67709	8.75826			0.408164	0.529229	0.0742379	2.23253
	2.60777	2.81906	2.7046	8.85678			0.435776	0.523233	0.0652698	2.17466
	2.65281	2.88319	2.73868	8.91262			0.477679	0.523878	0.0527263	2.1111
	2.67921	2.94863	2.79197	8.94555			0.48801	0.522798	0.0465657	2.05828
	2.6995	3.00806	2.86287	8.97336			0.454396	0.521165	0.055651	2.0233
	2.73255	3.06902	2.91113	8.98141			0.405618	0.531532	0.0693308	2.0133
	2.77844	3.15229	2.92894	8.98312			0.384618	0.551086	0.0622287	2.02193
	2.82847	3.25253	2.94973	9.02261			0.406847	0.570026	0.0381411	2.02288
	2.87914	3.3422	2.975	9.10083			0.431959	0.581935	0.0229294	2.0038
	2.91426	3.4117	2.99125	9.18347			0.416374	0.58352	0.0200819	1.9717
	2.92886	3.47331	3.01701	9.25268			0.374562	0.572027	0.0113359	1.92497
	2.94162	3.52828	3.05552	9.29458			0.354285	0.555736	-0.00833114	1.86764
	2.97003	3.581	3.0742	9.28971			0.375802	0.547249	-0.0325517	1.8151
	2.99957	3.64569	3.07837	9.26666			0.423934	0.549851	-0.049063	1.77129
	3.02285	3.7096	3.10363	9.2785			0.458511	0.557306	-0.0410607	1.72685
	3.04504	3.75422	3.1432	9.31742			0.449416	0.567918	-0.0182897	1.6882
	3.06212	3.7951	3.16815	9.34935			0.416137	0.580796	-0.0142231	1.67482
	3.06409	3.84745	3.17841	9.37956			0.407693	0.589823	-0.0413495	1.68147
	3.0577	3.89353	3.17971	9.40693			0.426224	0.587929	-0.0734256	1.68834
	3.04554	3.92653	3.17336	9.40771			0.437069	0.5805	-0.0836653	1.68842
	3.02953	3.95814	3.18491	9.39779			0.418656	0.573623	-0.0663427	1.67814
	3.03503	3.98326	3.22442	9.41657			0.382905	0.564146	-0.0350383	1.64887
	3.07222	4.00102	3.25253	9.45222			0.349605	0.549042	-0.0161479	1.60508
	3.1101	4.03088	3.24859	9.4764			0.340918	0.526815	-0.0219362	1.55761
	3.1279	4.07436	3.25021	9.49195			0.352515	0.500038	-0.0379712	1.49685
	3.13933	4.11092	3.28549	9.49563			0.357521	0.482308	-0.0439391	1.41633
	3.14841	4.13767	3.33595	9.47426			0.350217	0.482777	-0.0383427	1.33629
	3.16268	4.16651	3.38024	9.447			0.361578	0.493729	-0.0301316	1.2649
	3.19132	4.19514	3.40925	9.43755			0.402465	0.498873	-0.0309569	1.18825
	3.2186	4.21989	3.41569	9.43112			0.441232	0.491054	-0.0432242	1.11939
	3.2194	4.24673	3.40876	9.41903			0.447616	0.480923	-0.0483022	1.08816
	3.20863	4.27062	3.41241	9.42881			0.418294	0.478505	-0.0313563	1.09326
	3.20913	4.27453	3.42788	9.45914			0.37348	0.481868	-0.0110606	1.12133
	3.22167	4.26832	3.43226	9.47186			0.351737	0.479595	-0.0184487	1.15948
	3.2356	4.27047	3.42562	9.46763			0.38271	0.464435	-0.0519989	1.17568
	3.2522	4.27512	3.42587	9.46967			0.442523	0.438186	-0.0811864	1.14361
	3.25676	4.2851	3.43096	9.47122			0.478736	0.416757	-0.0830595	1.08761
	3.24168	4.31208	3.42823	9.47788			0.464237	0.412284	-0.0644382	1.04303
	3.23173	4.34486	3.4223	9.51537			0.417552	0.419374	-0.0575938	1.00963
	3.25141	4.36379	3.41086	9.55574			0.374215	0.423312	-0.0862859	0.984996
	3.27691	4.37978	3.37849	9.55204			0.349396	0.417988	-0.131516	0.973982
	3.28268	4.4028	3.3416	9.5218			0.324627	0.403809	-0.148011	0.956634
	3.28002	4.41954	3.3303	9.49852			0.286169	0.391281	-0.116644	0.910271
	3.28725	4.42931	3.33086	9.47484			0.245869	0.391801	-0.0680577	0.847955
	3.30499	4.44049	3.31727	9.45443			0.232571	0.396607	-0.0500972	0.796288
	3.33373	4.44451	3.30173	9.45075			0.257743	0.389239	-0.0789588	0.757851
	3.36018	4.43845	3.29964	9.4363			0.303062	0.369819	-0.127499	0.72988
	3.36307	4.43955	3.30707	9.39148			0.330858	0.344261	-0.159096	0.717406
	3.35017	4.45742	3.33354	9.35386			0.330884	0.321883	-0.165736	0.709744
	3.34512	4.48173	3.38034	9.35213			0.32208	0.311443	-0.166749	0.694381
	3.3497	4.50676	3.40617	9.36566			0.320939	0.3147	-0.181001	0.677781
	3.34573	4.53295	3.39254	9.38174			0.320357	0.323659	-0.206931	0.655696
	3.33183	4.54357	3.37613	9.40839			0.30502	0.331044	-0.219212	0.604883
	3.32215	4.52445	3.36855	9.4206			0.261929	0.336494	-0.199815	0.523944
	3.32578	4.49569	3.34364	9.39935			0.201044	0.337528	-0.170731	0.439005
	3.33269	4.4741	3.31011	9.38174			0.159704	0.330727	-0.171555	0.366714
	3.33498	4.45109	3.28994	9.38654			0.161652	0.317377	-0.201515	0.309241
	3.32075	4.42925	3.27274	9.37911			0.188269	0.303685	-0.225834	0.272766
	3.28815	4.42703	3.26123	9.35033			0.201858	0.289238	-0.224937	0.257338
	3.26384	4.43954	3.27643	9.32472			0.192784	0.270936	-0.202055	0.248141
	3.28233	4.45573	3.29279	9.28698			0.173409	0.249647	-0.17646	0.235557
	3.32638	4.48074	3.28213	9.22281			0.155837	0.225199	-0.173551	0.223087
	3.35158	4.50867	3.28252	9.16877			0.144361	0.194573	-0.1935	0.211166
	3.34161	4.51679	3.32381	9.14732			0.135716	0.169324	-0.199527	0.198592
	3.31597	4.50533	3.36961	9.14087			0.125405	0.163491	-0.17392	0.187498
	3.29808	4.49225	3.39015	9.14729			0.125236	0.175936	-0.146946	0.174436
	3.30711	4.48168	3.38702	9.17084			0.144158	0.198026	-0.148686	0.147847
	3.32862	4.47303	3.3513	9.18205			0.162379	0.222715	-0.177354	0.116257
	3.32699	4.4718	3.29313	9.16251			0.148975	0.240372	-0.210013	0.106114
	3.2871	4.47539	3.25883	9.13933			0.105093	0.247666	-0.221161	0.117118
	3.23427	4.4684	3.25776	9.12546			0.0498461	0.242177	-0.203643	0.125884
	3.1957	4.45165	3.25273	9.09823			0.0111819	0.227368	-0.187256	0.11879
	3.17294	4.44272	3.23884	9.05687			0.0111739	0.209228	-0.201699	0.0959771
	3.15609	4.43646	3.23623	9.02434			0.0445803	0.189284	-0.22806	0.0665974
	3.13622	4.42062	3.23642	8.99002			0.0743999	0.1691	-0.229238	0.047449
	3.11241	4.40674	3.23055	8.94838			0.0875719	0.154982	-0.201144	0.0464814
	3.10532	4.40104	3.2275	8.93196			0.0943857	0.145885	-0.175606	0.0416116
	3.13783	4.39117	3.21091	8.94054			0.0992899	0.132679	-0.184388	0.0154453
	3.18502	4.37732	3.16033	8.93078			0.0988149	0.116591	-0.229969	-0.0182861
	3.20999	4.36759	3.11021	8.89645			0.0932755	0.108222	-0.274608	-0.0496737
	3.21297	4.35251	3.10668	8.86114			0.079482	0.112833	-0.277988	-0.0849705
	3.21132	4.33213	3.13747	8.81685			0.0556048	0.132731	-0.245653	-0.119905
	3.20263	4.32245	3.16825	8.76255			0.0387573	0.160985	-0.217038	-0.142892
	3.18939	4.32362	3.18754	8.72532			0.0438151	0.174337	-0.220464	-0.162287
	3.16694	4.32109	3.18692	8.70299			0.0676532	0.160679	-0.247714	-0.182743
	3.12578	4.31737	3.16143	8.67912			0.0882198	0.130584	-0.265174	-0.193133
	3.08633	4.32065	3.13237	8.67104			0.0963753	0.101893	-0.245545	-0.206836
	3.09214	4.32513	3.11408	8.68891			0.0939782	0.0796519	-0.204509	-0.255313
	3.13541	4.32578	3.09423	8.70244			0.0910893	0.0607288	-0.190405	-0.32716
	3.17776	4.32452	3.07116	8.70048			0.099728	0.0418264	-0.226768	-0.381065
	3.19324	4.31595	3.06722	8.70566			0.122915	0.0209652	-0.286398	-0.403548
	3.17502	4.29053	3.08388	8.71022			0.141985	0.000151325	-0.325902	-0.397622
	3.13043	4.26167	3.09626	8.68718			0.143775	-0.00925099	-0.3264	-0.374176
	3.09159	4.24835	3.09231	8.64992			0.133586	-0.00434219	-0.302797	-0.373025
	3.08024	4.24198	3.07066	8.61721			0.124178	0.00586308	-0.283309	-0.419741
	3.08008	4.2354	3.02594	8.57441			0.114441	0.0152055	-0.276178	-0.479789
	3.06548	4.23412	2.9733	8.5298			0.101577	0.0217532	-0.261942	-0.513553
	3.04559	4.23218	2.95115	8.51218			0.0799247	0.0205571	-0.227941	-0.533058
	3.04078	4.22396	2.96291	8.50452			0.0544423	0.0170972	-0.194459	-0.553597
	3.05017	4.22311	2.97023	8.47962			0.0277925	0.0177201	-0.193558	-0.566216
	3.06336	4.22927	2.95996	8.45884			0.00542275	0.0178624	-0.222825	-0.569263
	3.07316	4.22035	2.95169	8.45287			-0.0112193	0.0149042	-0.249027	-0.560799
	3.07113	4.19713	2.95235	8.43633			-0.0205108	0.0186368	-0.247868	-0.532145
	3.05398	4.17854	2.9604	8.41762			-0.00915902	0.0242523	-0.231561	-0.50352
	3.0393	4.16561	2.9753	8.42708			0.0388782	0.0194868	-0.228006	-0.514472
	3.03491	4.15216	2.97142	8.44153			0.0998317	0.00456224	-0.249762	-0.562391
	3.02239	4.14754	2.93141	8.42894			0.122197	-0.0203838	-0.28231	-0.603572
	2.9805	4.15253	2.89802	8.39902			0.0883111	-0.0502034	-0.295986	-0.613306
	2.92302	4.15154	2.90104	8.35592			0.0270721	-0.0683945	-0.276553	-0.598883
	2.87935	4.13776	2.89601	8.28926			-0.0227116	-0.0671565	-0.246234	-0.570938
	2.86774	4.11881	2.84579	8.22329			-0.0369978	-0.055447	-0.244208	-0.549041
	2.88054	4.08847	2.78742	8.19046			-0.0156086	-0.0405204	-0.275804	-0.555797
	2.90119	4.04161	2.75807	8.16859			0.0101362	-0.0215849	-0.308688	-0.587073
	2.90207	4.00164	2.75906	8.13034			0.0145886	-0.00188958	-0.317501	-0.621974
	2.87671	3.98413	2.79022	8.09617			0.00755166	0.0118311	-0.307643	-0.656658
	2.86087	3.97409	2.82762	8.0759			0.0120131	0.0214672	-0.295142	-0.694159
	2.88005	3.973	2.82311	8.04801			0.0307492	0.0282253	-0.294658	-0.72262
	2.90256	3.99403	2.78618	8.02092			0.0485628	0.0273437	-0.310535	-0.732026
	2.90425	4.01826	2.77198	8.01412			0.0426466	0.0169333	-0.322148	-0.72858
	2.89294	4.02645	2.78178	7.99835			0.00684631	0.00448402	-0.311507	-0.715947
	2.88072	4.03001	2.78056	7.94969			-0.0357261	-0.0121379	-0.293306	-0.695911
	2.87445	4.03263	2.76499	7.90105			-0.0413061	-0.0377754	-0.289684	-0.680682
	2.88399	4.01557	2.73764	7.86976			-0.00806052	-0.0646247	-0.294525	-0.677435
	2.89054	3.98349	2.69561	7.83769			0.0235331	-0.0771219	-0.289477	-0.679154
	2.87229	3.9535	2.67697	7.82081			0.026082	-0.0741643	-0.269636	-0.682481
	2.82568	3.93023	2.71422	7.8687			0.0158223	-0.0624375	-0.239555	-0.696812
	2.79328	3.93106	2.77483	8.01181			0.0191598	-0.0545179	-0.220588	-0.725937
	2.79281	3.98491	2.83213	8.28724			0.0521919	-0.0610612	-0.235353	-0.758947
	2.82764	4.09212	2.91798	8.73155			0.0971046	-0.076597	-0.27337	-0.7931
	2.89304	4.22846	3.05238	9.29853			0.107553	-0.0898495	-0.297067	-0.826454
	2.96251	4.38231	3.20776	9.87286			0.0660053	-0.096348	-0.293378	-0.847495
	3.01889	4.55663	3.36	10.3816			0.0169693	-0.096547	-0.286587	-0.862739
	3.07675	4.7375	3.49473	10.8293			0.00181307	-0.0975657	-0.301278	-0.894167
	3.14537	4.91593	3.59574	11.2516			0.0136428	-0.104578	-0.336978	-0.942994
	3.20011	5.10632	3.6965	11.7209			0.0331305	-0.113402	-0.366194	-0.992304
	3.23808	5.31791	3.86131	12.3064			0.0502026	-0.119445	-0.360617	-1.04172
	3.28256	5.55316	4.08819	12.9671			0.0573826	-0.120372	-0.322381	-1.09054
	3.34642	5.82766	4.31019	13.5846			0.0572679	-0.111244	-0.284735	-1.12222
	3.43103	6.13633	4.49032	14.1088			0.0535121	-0.0894646	-0.272739	-1.13513
	3.54075	6.43907	4.6375	14.578			0.0365416	-0.0642588	-0.281461	-1.1333
	3.64441	6.71937	4.77196	15.0476			0.00510084	-0.0433781	-0.292592	-1.10077
	3.71549	6.9971	4.92707	15.5789			-0.0185954	-0.0313598	-0.292801	-1.03717
	3.76956	7.28756	5.12175	16.1943			-0.0129065	-0.036636	-0.28726	-0.979979
	3.82319	7.59369	5.31904	16.8099			0.0109288	-0.0617314	-0.29209	-0.956369
	3.86468	7.91138	5.47385	17.3284			0.0302365	-0.0944653	-0.311227	-0.961241
	3.90754	8.22118	5.60025	17.7666			0.0289211	-0.121432	-0.326481	-0.99162
	3.9761	8.50241	5.73692	18.2018			0.009176	-0.13588	-0.321528	-1.0493
	4.06228	8.76864	5.8889	18.6758			-0.0183877	-0.140396	-0.303612	-1.11365
	4.15123	9.04868	6.04443	19.1983			-0.0333048	-0.136961	-0.290224	-1.1591
	4.24396	9.3522	6.19649	19.7374			-0.0344168	-0.129014	-0.296139	-1.18492
	4.32972	9.66732	6.33003	20.2081			-0.0364297	-0.117088	-0.321366	-1.1825
	4.39358	9.97946	6.43794	20.5674			-0.0539814	-0.0980824	-0.348609	-1.14171
	4.44585	10.2746	6.54727	20.8898			-0.0794899	-0.0747808	-0.359002	-1.09503
	4.50793	10.5413	6.67786	21.2633			-0.0949269	-0.0632488	-0.354642	-1.08213
	4.58254	10.8001	6.80586	21.7017			-0.0871904	-0.0687645	-0.352415	-1.09589
	4.6601	11.081	6.9172	22.1897			-0.0608989	-0.0851934	-0.360399	-1.115
	4.7406	11.3731	7.03328	22.7009			-0.0313569	-0.105567	-0.368284	-1.13915
	4.81564	11.6458	7.16324	23.1668			-0.0117192	-0.120213	-0.363524	-1.15781
	4.87715	11.8952	7.29102	23.5625			-0.00855144	-0.123509	-0.351911	-1.16017
	4.94132	12.1291	7.41443	23.9581			-0.0156721	-0.121914	-0.35062	-1.16806
	5.03392	12.3594	7.52746	24.3967			-0.0183943	-0.118978	-0.36598	-1.191
	5.14251	12.6133	7.60914	24.8405			-0.0166492	-0.107498	-0.38593	-1.2
	5.23386	12.905	7.67499	25.2564			-0.019864	-0.089932	-0.393196	-1.17811
	5.28548	13.208	7.77124	25.6324			-0.0226784	-0.0774055	-0.376791	-1.1405
	5.30497	13.4937	7.89462	25.9429			-0.0198457	-0.0732754	-0.34599	-1.10851
	5.31527	13.7598	8.00839	26.2229			-0.0188274	-0.0834049	-0.329177	-1.09555
	5.33822	14.0113	8.11402	26.5675			-0.0244646	-0.110743	-0.340965	-1.11141
	5.38166	14.2513	8.22768	26.988			-0.0341191	-0.14125	-0.362697	-1.15094
	5.44669	14.4965	8.34108	27.4051			-0.04754	-0.162687	-0.371633	-1.19064
	5.52219	14.7605	8.45655	27.7752			-0.0512987	-0.176081	-0.368952	-1.21979
	5.60625	15.0253	8.58235	28.1064			-0.0360205	-0.185466	-0.362289	-1.24861
	5.70136	15.2671	8.68864	28.4023			-0.0169866	-0.182981	-0.357194	-1.27327
	5.78936	15.5022	8.76259	28.6964			-0.0194258	-0.16449	-0.364803	-1.27547
	5.84128	15.7559	8.85254	29.0497			-0.0338126	-0.136211	-0.382238	-1.25961
	5.87033	16.0281	8.98336	29.4438			-0.0433345	-0.110638	-0.384838	-1.24599
	5.90143	16.3205	9.11529	29.8034			-0.0464778	-0.0977949	-0.364508	-1.24067
	5.93348	16.6285	9.22384	30.1202			-0.0521641	-0.108988	-0.342158	-1.24341
	5.97113	16.9115	9.31131	30.437			-0.0647486	-0.135766	-0.327105	-1.2533
	6.02202	17.1462	9.3651	30.7587			-0.0889558	-0.15393	-0.318924	-1.25707
	6.07052	17.3619	9.39493	31.0914			-0.113542	-0.156622	-0.324094	-1.24989
	6.10797	17.5836	9.44725	31.4583			-0.115556	-0.158965	-0.339684	-1.25427
	6.15554	17.811	9.5267	31.8211			-0.0888493	-0.168849	-0.349266	-1.28397
	6.21981	18.0472	9.59807	32.1181			-0.051468	-0.181527	-0.351045	-1.32888
	6.28681	18.291	9.66574	32.3762			-0.0153723	-0.190561	-0.354268	-1.37707
	6.35739	18.5199	9.75888	32.661			0.013929	-0.188061	-0.357086	-1.42124
	6.43962	18.7342	9.87274	32.9802			0.0292678	-0.172584	-0.360713	-1.45434
	6.51732	18.9611	9.99167	33.3266			0.0353691	-0.160094	-0.371934	-1.469
	6.58054	19.2097	10.1016	33.6968			0.0383195	-0.16166	-0.385949	-1.46804
	6.63153	19.4584	10.168	34.0364			0.0262466	-0.173528	-0.39319	-1.45475
	6.66963	19.701	10.1828	34.3017			0.000128262	-0.187459	-0.395134	-1.42786
	6.69576	19.9434	10.2085	34.5432			-0.0123653	-0.198785	-0.395278	-1.40523
	6.73802	20.177	10.2942	34.8214			0.00127928	-0.211441	-0.388093	-1.41237
	6.80464	20.4055	10.4085	35.118			0.0276816	-0.228384	-0.37411	-1.43872
	6.87482	20.6576	10.5058	35.4034			0.0507343	-0.246345	-0.359221	-1.45228
	6.94017	20.9303	10.5788	35.6848			0.0566366	-0.261779	-0.34582	-1.44913
	7.00317	21.1929	10.6286	35.9468			0.0335305	-0.272965	-0.334203	-1.44189
	7.03836	21.4395	10.6664	36.1853			0.0066076	-0.276592	-0.325153	-1.43745
	7.04484	21.6752	10.7281	36.4602			0.00496603	-0.278363	-0.320174	-1.45095
	7.0654	21.8913	10.8261	36.8046			0.0239998	-0.287504	-0.326306	-1.48188
	7.12025	22.1049	10.9287	37.1649			0.0349288	-0.306013	-0.353746	-1.49829
	7.19309	22.3409	11.0181	37.4976			0.0279184	-0.32649	-0.39303	-1.49129
	7.26618	22.5863	11.1076	37.7984			0.0107582	-0.341202	-0.424295	-1.49088
	7.31272	22.8211	11.1925	38.0386			0.00328841	-0.340164	-0.440244	-1.50362
	7.32021	23.0542	11.2506	38.2175			0.0105087	-0.327632	-0.444668	-1.51107
	7.33194	23.2925	11.2861	38.411			0.0142463	-0.320117	-0.440602	-1.51248
	7.39356	23.5312	11.3148	38.6541			-0.00889966	-0.32353	-0.432939	-1.51484
	7.48281	23.7837	11.3426	38.8995			-0.04618	-0.325074	-0.424792	-1.51031
	7.55076	24.053	11.391	39.1265			-0.0572304	-0.31584	-0.411641	-1.49531
	7.59216	24.3039	11.4781	39.3568			-0.0258465	-0.303056	-0.396962	-1.48247
	7.62329	24.5085	11.5768	39.5819			0.0195327	-0.304209	-0.392541	-1.469
	7.65971	24.6915	11.6434	39.8107			0.0379907	-0.323714	-0.40217	-1.44901
	7.7157	24.8894	11.6971	40.0954			0.0181664	-0.346483	-0.416152	-1.44894
	7.78765	25.1087	11.7716	40.421			-0.0114142	-0.35619	-0.421274	-1.48691
	7.83687	25.3516	11.855	40.7002			-0.015092	-0.34985	-0.413602	-1.53547
	7.84679	25.6154	11.9314	40.9124			0.0145606	-0.338116	-0.403167	-1.56699
	7.85018	25.8603	12.0039	41.1053			0.055865	-0.33583	-0.398161	-1.58328
	7.8785	26.0663	12.0581	41.2959			0.0795415	-0.342021	-0.390849	-1.58191
	7.92352	26.2718	12.0859	41.5109			0.0684514	-0.346679	-0.371563	-1.55938
	7.9751	26.5102	12.1207	41.7936			0.0290426	-0.345193	-0.341225	-1.53667
	8.02556	26.7736	12.1762	42.0962			-0.00735529	-0.340051	-0.307463	-1.5211
	8.06926	27.0485	12.2205	42.3276			-0.0250965	-0.338846	-0.283202	-1.49594
	8.11152	27.3098	12.2525	42.5078			-0.0287459	-0.347033	-0.282394	-1.46756
	8.1656	27.5211	12.3077	42.7139			-0.0319802	-0.361265	-0.301215	-1.45979
	8.22155	27.6866	12.3847	42.9521			-0.0456887	-0.368424	-0.322077	-1.47561
	8.26168	27.8555	12.4655	43.2037			-0.0742802	-0.371112	-0.334827	-1.5065
	8.28776	28.0546	12.5541	43.4652			-0.0951683	-0.378094	-0.336946	-1.54706
	8.32863	28.2735	12.6291	43.6844			-0.0942583	-0.390273	-0.329128	-1.58621
	8.39587	28.4995	12.6514	43.8266			-0.0839731	-0.401594	-0.324086	-1.60853
	8.46596	28.7235	12.6492	43.9652			-0.0775139	-0.407484	-0.339221	-1.61593
	8.51262	28.8922	12.6783	44.1819			-0.0648996	-0.40214	-0.365208	-1.62614
	8.53076	29.1178	12.729	44.4562			-0.0374865	-0.387554	-0.382372	-1.64368
	8.52683	29.3527	12.7717	44.7445			-0.00230177	-0.372284	-0.393328	-1.65734
	8.5182	29.5945	12.8157	45.035			0.025893	-0.366191	-0.40651	-1.66137
	8.52971	29.8243	12.8562	45.2829			0.0291073	-0.369384	-0.417217	-1.65448
	8.56034	30.052	12.878	45.4538			0.0034379	-0.375637	-0.426519	-1.64021
	8.58863	30.2955	12.9155	45.6132			-0.0246539	-0.385089	-0.440028	-1.6366
	8.61426	30.5361	12.9937	45.8225			-0.0315716	-0.404335	-0.444481	-1.65944
	8.65024	30.7626	13.0689	46.0522			-0.0235737	-0.431945	-0.431315	-1.69459
	8.6914	30.9893	13.1144	46.2482			-0.016871	-0.462065	-0.416738	-1.71798
	8.73736	31.2149	13.1585	46.4262			-0.013075	-0.485958	-0.410289	-1.73078
	8.78741	31.4278	13.2113	46.5848			-0.00939519	-0.491358	-0.40579	-1.73938
	8.83194	31.6361	13.2636	46.726			-0.000504204	-0.473793	-0.407349	-1.73734
	8.86078	31.8451	13.3358	46.9233			0.0269812	-0.449404	-0.423343	-1.72302
	8.88695	32.0438	13.4265	47.2072			0.065372	-0.437672	-0.443309	-1.70241
	8.91443	32.2405	13.489	47.5036			0.0832662	-0.438831	-0.45468	-1.68366
	8.93169	32.4596	13.5157	47.7569			0.0661962	-0.445204	-0.454307	-1.67669
	8.93667	32.6931	13.5413	47.9706			0.0330833	-0.45202	-0.443615	-1.69065
	8.9505	32.9117	13.5693	48.1271			0.000487145	-0.462385	-0.430793	-1.71759
	8.98249	33.1088	13.588	48.2348			-0.0124977	-0.48117	-0.428158	-1.73541
	9.03335	33.3059	13.6176	48.3706			0.00315324	-0.508451	-0.435383	-1.74357
	9.09883	33.5175	13.6666	48.562			0.0313426	-0.532181	-0.441479	-1.75347
	9.15795	33.7567	13.7111	48.7423			0.047233	-0.534213	-0.444819	-1.75822
	9.19208	34.0291	13.7512	48.8877			0.0514589	-0.50747	-0.445044	-1.75125
	9.22296	34.2982	13.8057	49.0496			0.0462026	-0.475042	-0.440242	-1.74248
	9.27043	34.5199	13.8602	49.2464			0.03169	-0.460418	-0.437881	-1.72724
	9.31152	34.7099	13.896	49.4731			0.0201892	-0.465269	-0.446236	-1.69539
	9.31999	34.9059	13.9371	49.7406			0.0233471	-0.478541	-0.460353	-1.66828
	9.29448	35.1106	14.0013	49.9967			0.0279904	-0.490038	-0.471466	-1.66301
	9.24562	35.3197	14.0685	50.1538			0.0238898	-0.493402	-0.479677	-1.65979
	9.21024	35.532	14.1291	50.2334			0.016438	-0.497282	-0.484396	-1.65057
	9.23865	35.7299	14.185	50.3325			0.0131449	-0.51123	-0.486046	-1.65234
	9.32004	35.9157	14.2243	50.4817			0.00766736	-0.525621	-0.490026	-1.65259
	9.39594	36.1257	14.2445	50.6766			-0.00549951	-0.523734	-0.494785	-1.62428
	9.42946	36.3633	14.278	50.923			-0.0172566	-0.509815	-0.493267	-1.57554
	9.42908	36.5849	14.3336	51.1656			-0.0195584	-0.49924	-0.488947	-1.52993
	9.41558	36.7692	14.3764	51.3351			-0.0202421	-0.503444	-0.49023	-1.49948
	9.41516	36.9325	14.3945	51.4785			-0.0283013	-0.519701	-0.494996	-1.50074
	9.44615	37.0846	14.4114	51.6792			-0.0465486	-0.533064	-0.497383	-1.54422
	9.49585	37.2418	14.433	51.9105			-0.0744904	-0.531121	-0.493938	-1.59368
	9.53099	37.4329	14.4524	52.1338			-0.0936489	-0.523718	-0.482719	-1.59824
	9.55433	37.6564	14.4819	52.3314			-0.0851032	-0.531004	-0.468656	-1.56059
	9.5883	37.877	14.5184	52.4875			-0.0504284	-0.558068	-0.465478	-1.51335
	9.62997	38.0915	14.5357	52.5839			-0.0194945	-0.589511	-0.478527	-1.47817
	9.65872	38.3122	14.5463	52.684			-0.0125945	-0.605349	-0.496406	-1.47684
	9.6792	38.5175	14.585	52.8431			-0.0278728	-0.601577	-0.502352	-1.51456
	9.70112	38.7015	14.6407	53.0187			-0.0458807	-0.587576	-0.491583	-1.55595
	9.72636	38.8974	14.6863	53.1843			-0.0504542	-0.584665	-0.480682	-1.57211
	9.75893	39.1046	14.7253	53.376			-0.0328707	-0.598854	-0.487342	-1.5783
	9.797	39.2974	14.7571	53.5503			-0.00894893	-0.610981	-0.510538	-1.58773
	9.81531	39.4888	14.767	53.7226			-0.00411278	-0.606093	-0.534794	-1.58698
	9.80422	39.6947	14.781	53.898			-0.0179271	-0.598378	-0.546467	-1.57179
	9.79347	39.8994	14.8283	54.058			-0.0168717	-0.605489	-0.536562	-1.55033
	9.81073	40.1082	14.8774	54.2572			0.0105856	-0.631275	-0.511926	-1.52617
	9.83887	40.3445	14.8973	54.4057			0.0372465	-0.667564	-0.493067	-1.51353
	9.83997	40.5839	14.917	54.5312			0.0336696	-0.695189	-0.484614	-1.53574
	9.80415	40.7873	14.9558	54.6466			-0.00975581	-0.693517	-0.473844	-1.58965
	9.74878	40.9646	14.9973	54.7637			-0.0730118	-0.673744	-0.465169	-1.64248
	9.70981	41.1407	15.0512	54.9401			-0.108873	-0.662014	-0.480456	-1.67185
	9.73327	41.3171	15.1247	55.168			-0.097202	-0.667257	-0.518287	-1.68166
	9.82261	41.506	15.1763	55.3494			-0.0689886	-0.680086	-0.55347	-1.67879
	9.9149	41.7258	15.1909	55.4585			-0.057488	-0.693615	-0.567163	-1.66788
	9.96496	41.9508	15.2079	55.5688			-0.058726	-0.708561	-0.552544	-1.65972
	9.98134	42.1421	15.201	55.7124			-0.0527275	-0.734648	-0.520256	-1.65149
	9.98654	42.3113	15.2305	55.8854			-0.03483	-0.773505	-0.501997	-1.62947
	9.99142	42.4846	15.2478	56.1125			-0.0214472	-0.804049	-0.5204	-1.5995
	10.0073	42.6606	15.2691	56.3576			-0.0415583	-0.801314	-0.554392	-1.5788
	10.0195	42.8425	15.2803	56.5186			-0.0957143	-0.766447	-0.573293	-1.57322
	10.0159	43.0337	15.2982	56.5944			-0.143948	-0.729337	-0.575515	-1.58266
	10.0241	43.2019	15.3568	56.6914			-0.147818	-0.713729	-0.57245	-1.60577
	10.0745	43.3365	15.4249	56.8531			-0.122519	-0.717434	-0.571595	-1.62735
	10.14	43.4764	15.4497	57.0583			-0.111276	-0.720801	-0.575271	-1.62715
	10.1753	43.6455	15.4453	57.2945			-0.136382	-0.715822	-0.575466	-1.61104
	10.1702	43.8214	15.4447	57.5131			-0.178705	-0.713673	-0.559621	-1.59363
	10.1523	43.9926	15.4481	57.6405			-0.204001	-0.728746	-0.537364	-1.574
	10.1585	44.1716	15.4654	57.7084			-0.185691	-0.757223	-0.529405	-1.54987
	10.2114	44.3593	15.511	57.8162			-0.141329	-0.782284	-0.538812	-1.52977
	10.2896	44.5551	15.5562	57.9736			-0.122342	-0.787883	-0.553918	-1.51696
	10.3434	44.7678	15.5816	58.1433			-0.145372	-0.77746	-0.56456	-1.49935
	10.363	44.9865	15.6163	58.3283			-0.172801	-0.768529	-0.56914	-1.481
	10.3789	45.1858	15.6698	58.4998			-0.174963	-0.777797	-0.574841	-1.4783
	10.3967	45.3729	15.7075	58.6074			-0.1552	-0.79787	-0.591302	-1.49014
	10.4055	45.5746	15.725	58.697			-0.140688	-0.809221	-0.612222	-1.51451
	10.414	45.7807	15.7475	58.8467			-0.15359	-0.808802	-0.618558	-1.55157
	10.416	45.9652	15.7751	59.0233			-0.182293	-0.808525	-0.602305	-1.57601
	10.4001	46.13	15.8024	59.1695			-0.186824	-0.814045	-0.574404	-1.56736
	10.3863	46.2816	15.8431	59.3033			-0.158801	-0.828304	-0.555119	-1.55354
	10.3955	46.4205	15.8814	59.4257			-0.136955	-0.846569	-0.556265	-1.56172
	10.4139	46.5704	15.9061	59.5213			-0.157994	-0.85571	-0.572824	-1.57583
	10.4357	46.7488	15.9107	59.6511			-0.210515	-0.850627	-0.58523	-1.58002
	10.4679	46.9304	15.9299	59.8593			-0.246528	-0.843326	-0.583107	-1.58359
	10.5025	47.1021	15.9576	60.0703			-0.238032	-0.841444	-0.576378	-1.58806
	10.5303	47.2822	15.9715	60.2181			-0.205408	-0.841932	-0.574107	-1.59259
	10.5583	47.4741	15.9772	60.3322			-0.192038	-0.841155	-0.569977	-1.61411
	10.5787	47.6555	15.981	60.431			-0.209027	-0.835956	-0.557869	-1.65091
	10.5784	47.8312	15.9786	60.51			-0.22915	-0.829074	-0.545447	-1.681
	10.5693	48.0165	15.9918	60.6178			-0.206386	-0.833137	-0.544897	-1.70114
	10.5838	48.2035	16.0364	60.7668			-0.138313	-0.857045	-0.560274	-1.71953
	10.6202	48.392	16.0803	60.8749			-0.0784615	-0.887913	-0.582189	-1.71979
	10.6448	48.596	16.1027	60.9198			-0.0828273	-0.911209	-0.595953	-1.68404
	10.6465	48.7967	16.1307	60.9863			-0.141434	-0.923719	-0.596511	-1.63419
	10.6516	48.9652	16.1753	61.1084			-0.19562	-0.932618	-0.597999	-1.59199
	10.6824	49.123	16.2096	61.2649			-0.198904	-0.943648	-0.62011	-1.55595
	10.7327	49.3067	16.2324	61.4689			-0.161076	-0.956261	-0.663106	-1.54088
	10.7739	49.5074	16.2538	61.6923			-0.132772	-0.957386	-0.702354	-1.56151
	10.7767	49.7087	16.2565	61.8362			-0.157651	-0.935741	-0.713655	-1.5926
	10.7464	49.908	16.1924	61.8986			-0.222119	-0.902072	-0.696438	-1.60435
	10.7262	50.0806	16.2225	61.9813			-0.263201	-0.880072	-0.662184	-1.6019
	10.7494	50.2196	16.2762	62.1105			-0.238818	-0.870798	-0.625076	-1.59921
	10.7991	50.3808	16.3052	62.2581			-0.182192	-0.866942	-0.602106	-1.60088
	10.8328	50.6008	16.3145	62.4386			-0.152543	-0.866041	-0.598633	-1.61213
	10.8369	50.8365	16.3357	62.6251			-0.164628	-0.870227	-0.600271	-1.62717
	10.8323	51.0438	16.3652	62.7402			-0.189206	-0.881181	-0.59991	-1.62657
	10.8304	51.2254	16.4017	62.8021			-0.191833	-0.905302	-0.613226	-1.60848
	10.8324	51.3888	16.46	62.9021			-0.170449	-0.934559	-0.643888	-1.59276
	10.8385	51.5452	16.5067	63.0389			-0.168205	-0.948735	-0.675727	-1.59039
	10.838	51.7292	16.5019	63.1589			-0.225458	-0.945243	-0.694087	-1.59431
	10.8176	51.9402	16.4744	63.2718			-0.304911	-0.940598	-0.689772	-1.59969
	10.808	52.133	16.4627	63.3824			-0.343498	-0.943107	-0.657508	-1.60875
	10.8331	52.2994	16.4537	63.4655			-0.328505	-0.947929	-0.614366	-1.6144
	10.8677	52.4745	16.4432	63.5704			-0.298797	-0.94897	-0.586442	-1.60756
	10.889	52.6575	16.4488	63.7658			-0.298324	-0.938452	-0.573076	-1.59713
	10.9102	52.8328	16.4535	63.9925			-0.341112	-0.915623	-0.565022	-1.59051
	10.9367	53.0093	16.442	64.1576			-0.382634	-0.892417	-0.571605	-1.58338
	10.9677	53.1812	16.4529	64.2661			-0.368758	-0.885704	-0.599378	-1.58309
	11.0039	53.3169	16.502	64.3423			-0.307922	-0.896311	-0.629637	-1.59317
	11.0251	53.4326	16.5475	64.3872			-0.262327	-0.914231	-0.646325	-1.59804
	11.0016	53.5747	16.5752	64.4718			-0.266976	-0.934311	-0.650492	-1.58689
	10.9542	53.7397	16.6039	64.6598			-0.298964	-0.95868	-0.641196	-1.56192
	10.9306	53.9065	16.6207	64.8781			-0.30972	-0.983576	-0.62036	-1.52345
	10.9472	54.0843	16.6151	65.0384			-0.27703	-1.00463	-0.596758	-1.47342
	10.9933	54.2682	16.6152	65.1576			-0.229686	-1.01632	-0.575761	-1.43011
	11.0528	54.4297	16.64	65.2587			-0.224553	-1.01965	-0.558547	-1.40356
	11.0959	54.5729	16.67	65.3411			-0.270943	-1.02128	-0.555813	-1.3821
	11.1071	54.7235	16.709	65.4498			-0.311219	-1.02969	-0.57224	-1.35757
	11.1165	54.8743	16.7645	65.6032			-0.292868	-1.04197	-0.596403	-1.33436
	11.1412	55.0213	16.8008	65.7082			-0.238514	-1.04654	-0.616918	-1.31319
	11.1559	55.1796	16.793	65.7071			-0.203135	-1.03641	-0.623321	-1.28871
	11.1486	55.329	16.7682	65.6758			-0.216205	-1.02251	-0.609768	-1.27134
	11.1459	55.4324	16.7503	65.6837			-0.26267	-1.02206	-0.584811	-1.27311
	11.1606	55.5092	16.7428	65.7415			-0.289963	-1.03859	-0.569709	-1.28771
	11.2023	55.6043	16.7628	65.8728			-0.267749	-1.05606	-0.575906	-1.32075
	11.2708	55.7198	16.8031	66.061			-0.235619	-1.06102	-0.603108	-1.38813
	11.3258	55.8507	16.8155	66.2032			-0.250073	-1.05106	-0.641501	-1.46452
	11.3346	56.0021	16.79	66.2677			-0.301227	-1.03008	-0.668933	-1.50765
	11.3273	56.1573	16.7772	66.3433			-0.333011	-1.01017	-0.668612	-1.51426
	11.3378	56.2941	16.8	66.46			-0.304325	-1.00253	-0.645019	-1.49301
	11.3638	56.4417	16.8328	66.5683			-0.236107	-1.00624	-0.614489	-1.44677
	11.3998	56.6269	16.8336	66.6682			-0.189873	-1.0139	-0.58784	-1.40036
	11.4414	56.8229	16.8888	66.7625			-0.209285	-1.02252	-0.572966	-1.38078
	11.4563	57.0025	16.9271	66.8158			-0.265798	-1.0301	-0.571398	-1.3767
	11.4336	57.167	16.9471	66.8664			-0.293364	-1.03632	-0.57075	-1.37011
	11.4063	57.3086	16.9666	67.0051			-0.260243	-1.04273	-0.563056	-1.36954
	11.3985	57.4324	16.975	67.2056			-0.206827	-1.04958	-0.55653	-1.37367
	11.3953	57.5846	16.9503	67.383			-0.200539	-1.0558	-0.562506	-1.36698
	11.3858	57.7837	16.924	67.5308			-0.256363	-1.06631	-0.580216	-1.35673
	11.3848	57.985	16.9343	67.6454			-0.31504	-1.08244	-0.597608	-1.35795
	11.4052	58.1654	16.9673	67.6739			-0.315524	-1.09779	-0.603493	-1.36051
	11.4424	58.3423	16.9938	67.6446			-0.254562	-1.10554	-0.59976	-1.34874
	11.4869	58.5108	17.0214	67.6479			-0.192149	-1.10749	-0.597994	-1.32865
	11.524	58.6603	17.0442	67.6767			-0.186655	-1.10593	-0.601908	-1.30129
	11.5451	58.8108	17.0481	67.691			-0.231506	-1.10665	-0.609869	-1.25919
	11.5627	58.9669	17.0568	67.7348			-0.262186	-1.10824	-0.620484	-1.22521
	11.5871	59.1069	17.0863	67.8216			-0.234565	-1.10496	-0.627963	-1.22493
	11.6092	59.2441	17.1047	67.8872			-0.184643	-1.09169	-0.62875	-1.24141
	11.6187	59.4089	17.1069	67.9394			-0.185027	-1.07758	-0.631446	-1.25303
	11.6237	59.5923	17.1287	68.0434			-0.25313	-1.07488	-0.634739	-1.26319
	11.6334	59.7782	17.1624	68.1688			-0.326773	-1.0845	-0.625091	-1.27406
	11.6441	59.9857	17.1724	68.2623			-0.344822	-1.10141	-0.601352	-1.28493
	11.6451	60.2081	17.1688	68.3569			-0.305591	-1.1208	-0.572308	-1.31111
	11.6457	60.3976	17.1683	68.4646			-0.270075	-1.13526	-0.538976	-1.35877
	11.6578	60.5416	17.1563	68.5526			-0.291924	-1.14138	-0.511193	-1.39864
	11.6721	60.6738	17.1436	68.6512			-0.348243	-1.1458	-0.507453	-1.39722
	11.6761	60.8085	17.1557	68.7952			-0.353698	-1.15191	-0.518503	-1.34871
	11.6738	60.9555	17.1634	68.9146			-0.275889	-1.1517	-0.519907	-1.27247
	11.6601	61.141	17.1382	68.9619			-0.177496	-1.13975	-0.513947	-1.20387
	11.6301	61.3565	17.1201	69.0081			-0.139913	-1.12549	-0.518227	-1.17613
	11.6089	61.5545	17.1424	69.0966			-0.189286	-1.11839	-0.531366	-1.195
	11.6221	61.7337	17.1841	69.1884			-0.279452	-1.12125	-0.545635	-1.23707
	11.6535	61.9229	17.2321	69.2819			-0.324085	-1.1318	-0.560007	-1.27856
	11.6795	62.1102	17.2815	69.3865			-0.29037	-1.14463	-0.562918	-1.3152
	11.6905	62.2771	17.2964	69.4389			-0.232206	-1.15082	-0.550455	-1.34115
	11.6856	62.4366	17.2714	69.4216			-0.212784	-1.15268	-0.545087	-1.34637
	11.6797	62.5869	17.2625	69.4258			-0.232873	-1.15734	-0.564613	-1.34608
	11.6949	62.7101	17.295	69.4855			-0.250575	-1.16466	-0.595248	-1.36078
	11.722	62.8258	17.3317	69.5506			-0.230393	-1.16068	-0.618572	-1.38271
	11.7293	62.9706	17.3555	69.6148			-0.183728	-1.14394	-0.625622	-1.39622
	11.7192	63.1289	17.3715	69.6856			-0.159244	-1.12709	-0.608348	-1.3967
	11.719	63.2712	17.3684	69.7148			-0.1849	-1.11962	-0.579766	-1.38249
	11.7376	63.4015	17.3595	69.7187			-0.215987	-1.12237	-0.565374	-1.35915
	11.7679	63.5165	17.3836	69.7883			-0.185722	-1.13518	-0.568116	-1.34889
	11.8066	63.5973	17.431	69.912			-0.100665	-1.1543	-0.570735	-1.36145
	11.8349	63.6598	17.4556	70.0037			-0.0390112	-1.17528	-0.568306	-1.37937
	11.8402	63.7342	17.461	70.0582			-0.0653925	-1.1985	-0.566347	-1.38971
	11.8364	63.8049	17.4776	70.1148			-0.164177	-1.22275	-0.569063	-1.38966
	11.8304	63.8713	17.4943	70.1635			-0.256016	-1.23416	-0.575999	-1.36907
	11.8105	63.9702	17.4983	70.2211			-0.2622	-1.2214	-0.574325	-1.32782
	11.7895	64.1065	17.4998	70.3353			-0.197614	-1.19194	-0.557786	-1.29547
	11.7818	64.2534	17.4903	70.46			-0.160566	-1.16006	-0.545665	-1.29081
	11.7728	64.4203	17.4615	70.5114			-0.207116	-1.1393	-0.560596	-1.29658
	11.761	64.6099	17.4432	70.5146			-0.284989	-1.14146	-0.594234	-1.30522
	11.7752	64.7784	17.4607	70.5197			-0.321652	-1.16721	-0.61731	-1.33455
	11.811	64.9055	17.4831	70.5161			-0.298288	-1.20112	-0.609962	-1.38264
	11.8445	65.0179	17.4838	70.5342			-0.258934	-1.22946	-0.573637	-1.43319
	11.8738	65.1201	17.4821	70.6348			-0.261003	-1.2518	-0.532616	-1.48046
	11.9001	65.2074	17.4929	70.7614			-0.309154	-1.26826	-0.514393	-1.5016
	11.9079	65.3112	17.5074	70.8241			-0.34383	-1.27109	-0.523101	-1.47436
	11.8955	65.4545	17.5276	70.8453			-0.321857	-1.25845	-0.53842	-1.42757
	11.8799	65.6086	17.5464	70.8657			-0.271875	-1.23495	-0.545506	-1.40168
	11.8698	65.7636	17.5416	70.8735			-0.266097	-1.21275	-0.552233	-1.39034
	11.8702	65.9365	17.5242	70.9035			-0.329967	-1.2072	-0.571641	-1.3769
	11.891	66.1057	17.5331	70.9943			-0.406015	-1.22658	-0.604871	-1.37896
	11.9215	66.245	17.5663	71.0786			-0.414498	-1.25767	-0.634057	-1.41069
	11.9298	66.3774	17.5879	71.1002			-0.351203	-1.28258	-0.635094	-1.46569
	11.9183	66.5061	17.5968	71.1267			-0.294508	-1.29313	-0.602195	-1.53654
	11.9218	66.5898	17.6047	71.2055			-0.31805	-1.29876	-0.560452	-1.6011
	11.9514	66.6408	17.5976	71.2927			-0.410537	-1.31213	-0.541291	-1.62656
	11.9879	66.7082	17.5798	71.3795			-0.474474	-1.33678	-0.552739	-1.61357
	12.0198	66.7935	17.577	71.4826			-0.436015	-1.35486	-0.571374	-1.5913
	12.0325	66.8926	17.5762	71.5343			-0.329367	-1.3441	-0.569517	-1.56724
	12.0108	67.0344	17.558	71.5			-0.255254	-1.30839	-0.551192	-1.53094
	11.9724	67.2036	17.558	71.475			-0.259984	-1.27307	-0.543172	-1.49606
	11.9588	67.3534	17.6035	71.5161			-0.298962	-1.25707	-0.549926	-1.48149
	11.9742	67.49	17.6535	71.5821			-0.294628	-1.26074	-0.548124	-1.47884
	11.9841	67.6418	17.6716	71.6631			-0.232712	-1.27286	-0.52107	-1.47739
	11.9616	67.7896	17.6653	71.7578			-0.176293	-1.2823	-0.474097	-1.47677
	11.9149	67.9175	17.6393	71.7939			-0.197978	-1.28783	-0.437576	-1.46751
	11.8684	68.0491	17.6136	71.766			-0.292697	-1.29946	-0.452014	-1.44643
	11.8482	68.1886	17.6393	71.779			-0.367102	-1.32105	-0.516474	-1.43435
	11.8711	68.3163	17.711	71.8542			-0.346409	-1.33768	-0.577163	-1.44687
	11.9232	68.457	17.7559	71.9192			-0.270681	-1.33629	-0.594937	-1.46994
	11.9669	68.638	17.744	71.9686			-0.241659	-1.3201	-0.584788	-1.48323
	11.9904	68.8251	17.7067	72.0272			-0.304922	-1.30391	-0.57698	-1.48165
	12.0005	68.9851	17.6625	72.0577			-0.408068	-1.29547	-0.58641	-1.4703
	11.9967	69.1353	17.622	72.0598			-0.457598	-1.29531	-0.607454	-1.46411
	11.9877	69.2792	17.6126	72.1029			-0.405823	-1.29617	-0.61343	-1.48233
	11.9985	69.4091	17.6438	72.1732			-0.311573	-1.29367	-0.584373	-1.51906
	12.0267	69.5561	17.6522	72.1965			-0.270998	-1.29061	-0.544065	-1.53828
	12.0456	69.7361	17.6607	72.1921			-0.307468	-1.30026	-0.53652	-1.51367
	12.0505	69.904	17.7058	72.2192			-0.368737	-1.32468	-0.562244	-1.45449
	12.0467	70.0395	17.7418	72.2546			-0.397753	-1.34796	-0.58617	-1.38891
	12.0293	70.1721	17.7429	72.2911			-0.380043	-1.35253	-0.58521	-1.34227
	12.0029	70.3114	17.7084	72.3666			-0.350777	-1.34024	-0.567061	-1.33545
	11.9908	70.4434	17.6656	72.4316			-0.350271	-1.32587	-0.555604	-1.36281
	12.0043	70.5673	17.6207	72.4087			-0.363839	-1.31865	-0.572478	-1.39051
	12.0387	70.6829	17.6035	72.3442			-0.346828	-1.31824	-0.609988	-1.4008
	12.0866	70.7674	17.6252	72.3171			-0.293835	-1.32341	-0.628858	-1.40068
	12.1339	70.8316	17.6461	72.3222			-0.26217	-1.32997	-0.609149	-1.39763
	12.1623	70.9255	17.6536	72.368			-0.299527	-1.33677	-0.574727	-1.39806
	12.1764	71.0626	17.6799	72.4842			-0.381312	-1.34806	-0.560462	-1.4173
	12.1858	71.2099	17.7216	72.6099			-0.438757	-1.36198	-0.578282	-1.45637
	12.1808	71.3633	17.7477	72.6779			-0.42821	-1.36719	-0.606975	-1.49496
	12.1583	71.5324	17.7607	72.733			-0.361982	-1.35802	-0.611016	-1.52542
	12.1405	71.6941	17.766	72.8114			-0.303166	-1.34344	-0.58025	-1.55102
	12.1322	71.8425	17.7424	72.864			-0.30015	-1.33154	-0.545277	-1.56268
	12.1295	72.0017	17.7084	72.8796			-0.327748	-1.32697	-0.536214	-1.5607
	12.1451	72.1548	17.7137	72.9015			-0.32493	-1.33681	-0.551639	-1.57063
	12.1792	72.2749	17.7499	72.9054			-0.284556	-1.35974	-0.565597	-1.59679
	12.2084	72.3859	17.7658	72.8605			-0.24578	-1.38274	-0.556368	-1.61075
	12.2259	72.5099	17.7497	72.8273			-0.246953	-1.40261	-0.530531	-1.6024
	12.2395	72.6262	17.718	72.8415			-0.292824	-1.42254	-0.521281	-1.58332
	12.2428	72.7443	17.6854	72.8484			-0.343283	-1.44035	-0.552328	-1.55603
	12.2343	72.8954	17.6786	72.8336			-0.347904	-1.44884	-0.605201	-1.53008
	12.2272	73.0682	17.7113	72.8261			-0.315428	-1.44757	-0.640842	-1.53093
	12.2251	73.2313	17.7451	72.794			-0.297191	-1.43443	-0.639389	-1.55067
	12.2182	73.381	17.7434	72.7255			-0.317915	-1.41138	-0.615112	-1.56219
	12.2068	73.5073	17.7326	72.7015			-0.344092	-1.38949	-0.594127	-1.57478
	12.1987	73.5765	17.7425	72.7469			-0.325631	-1.3797	-0.587153	-1.60236
	12.1919	73.6084	17.7551	72.7989			-0.267931	-1.38157	-0.5813	-1.62508
	12.18	73.6628	17.7527	72.8546			-0.228177	-1.39354	-0.559804	-1.62581
	12.1796	73.748	17.7412	72.9456			-0.255452	-1.4125	-0.530115	-1.61174
	12.2044	73.8488	17.7215	73.0239			-0.338481	-1.43138	-0.521696	-1.58359
	12.2356	73.9865	17.7066	73.0633			-0.414448	-1.44756	-0.54809	-1.54457
	12.2528	74.1506	17.7319	73.1252			-0.415581	-1.46069	-0.580319	-1.52571
	12.2638	74.2942	17.7905	73.2097			-0.349357	-1.46578	-0.574343	-1.54063
	12.2781	74.4287	17.8228	73.25			-0.299596	-1.46205	-0.524007	-1.56057
	12.2955	74.5867	17.8141	73.263			-0.329767	-1.46001	-0.473403	-1.56512
	12.315	74.7259	17.7757	73.3028			-0.412448	-1.46525	-0.464756	-1.56179
	12.3326	74.8096	17.7967	73.3344			-0.472088	-1.46655	-0.493123	-1.55453
	12.34	74.8699	17.7995	73.3442			-0.460082	-1.45964	-0.521577	-1.54019
	12.3475	74.9328	17.7826	73.3914			-0.402508	-1.45125	-0.518068	-1.52636
	12.3762	74.9991	17.7399	73.4514			-0.371873	-1.44359	-0.484903	-1.51505
	12.4217	75.0981	17.6622	73.4437			-0.401521	-1.43946	-0.463505	-1.4972
	12.4521	75.2361	17.5985	73.406			-0.443283	-1.44185	-0.492974	-1.48432
	12.4584	75.3581	17.5986	73.409			-0.434381	-1.44968	-0.555068	-1.50223
	12.456	75.4333	17.6353	73.4252			-0.377033	-1.45773	-0.600494	-1.55065
	12.4439	75.4982	17.6575	73.4356			-0.33403	-1.47025	-0.612414	-1.60856
	12.417	75.5646	17.6694	73.4753			-0.340028	-1.48601	-0.605128	-1.66279
	12.3954	75.6086	17.6816	73.5043			-0.366612	-1.49356	-0.596417	-1.70489
	12.3863	75.6492	17.6859	73.4667			-0.368373	-1.48729	-0.598148	-1.72633
	12.3741	75.7141	17.6988	73.4304			-0.329314	-1.47901	-0.604755	-1.72783
	12.3694	75.7768	17.7253	73.4775			-0.282213	-1.47979	-0.591442	-1.71649
	12.3825	75.8438	17.7227	73.5753			-0.280287	-1.49423	-0.561036	-1.69057
	12.3882	75.9717	17.6836	73.6803			-0.329536	-1.51897	-0.549479	-1.65059
	12.3751	76.152	17.6707	73.7861			-0.373744	-1.54192	-0.57204	-1.61734
	12.3671	76.3316	17.7106	73.837			-0.377379	-1.54882	-0.60034	-1.60815
	12.3738	76.5062	17.7607	73.805			-0.357317	-1.53741	-0.602022	-1.62393
	12.3916	76.6762	17.7953	73.7916			-0.348279	-1.51978	-0.573823	-1.66458
	12.423	76.8019	17.8096	73.8642			-0.371808	-1.50709	-0.535846	-1.72665
	12.4579	76.8891	17.7895	73.9403			-0.415251	-1.49626	-0.519532	-1.78945
	12.4686	76.98	17.7531	73.9613			-0.429592	-1.48207	-0.539015	-1.82916
	12.4571	77.0741	17.7395	73.9607			-0.39248	-1.46663	-0.567345	-1.84438
	12.4456	77.1609	17.7295	73.9389			-0.343359	-1.45627	-0.568386	-1.84067
	12.4379	77.2703	17.685	73.9007			-0.333209	-1.45483	-0.543649	-1.81468
	12.431	77.419	17.6368	73.9221			-0.370044	-1.46175	-0.527917	-1.77629
	12.4372	77.5813	17.6317	74.0139			-0.420617	-1.47518	-0.540586	-1.74445
	12.4522	77.743	17.6555	74.0869			-0.442129	-1.49276	-0.570782	-1.72398
	12.4643	77.9086	17.6855	74.113			-0.422569	-1.51615	-0.587485	-1.71664
	12.4893	78.0448	17.7142	74.1333			-0.388397	-1.54527	-0.572376	-1.73057
	12.5392	78.1235	17.7145	74.1287			-0.385621	-1.57085	-0.545925	-1.75427
	12.591	78.1813	17.6796	74.0891			-0.418911	-1.57954	-0.543785	-1.76355
	12.6322	78.257	17.6628	74.0813			-0.446932	-1.57095	-0.56909	-1.76312
	12.6655	78.3296	17.695	74.1233			-0.440397	-1.55804	-0.588958	-1.77193
	12.6661	78.3976	17.7361	74.156			-0.416042	-1.55319	-0.576497	-1.784
	12.623	78.4827	17.7532	74.1875			-0.401268	-1.55168	-0.533444	-1.79337
	12.5645	78.5648	17.7539	74.2738			-0.412206	-1.54587	-0.492027	-1.81177
	12.511	78.6305	17.7166	74.3871			-0.444808	-1.53183	-0.487704	-1.82953
	12.4709	78.7151	17.6792	74.4854			-0.469008	-1.51299	-0.522867	-1.82767
	12.4643	78.8175	17.6728	74.5911			-0.470208	-1.50159	-0.564083	-1.81879
	12.4886	78.8906	17.6918	74.6639			-0.47051	-1.50676	-0.578633	-1.81841
	12.5065	78.9374	17.6821	74.6082			-0.48922	-1.5211	-0.566356	-1.81895
	12.4957	78.9863	17.6426	74.451			-0.511504	-1.53472	-0.554539	-1.82201
	12.4729	79.033	17.6263	74.304			-0.516561	-1.54708	-0.568244	-1.84315
	12.4567	79.0878	17.6497	74.2065			-0.496183	-1.56148	-0.600623	-1.86983
	12.4624	79.1946	17.6853	74.1763			-0.472875	-1.57856	-0.616667	-1.88203
	12.4973	79.3563	17.7134	74.2411			-0.478252	-1.5966	-0.596547	-1.89269
	12.5428	79.5305	17.7192	74.3237			-0.519616	-1.60962	-0.560532	-1.90869
	12.5634	79.7037	17.6948	74.3148			-0.577491	-1.61254	-0.545135	-1.90767
	12.554	79.8811	17.6739	74.2527			-0.622128	-1.60873	-0.557136	-1.88173
	12.5479	80.0264	17.6853	74.2343			-0.623573	-1.60508	-0.568817	-1.84882
	12.5624	80.125	17.6945	74.2534			-0.586232	-1.60368	-0.554552	-1.81701
	12.5796	80.2167	17.6673	74.2831			-0.542557	-1.60543	-0.524017	-1.79307
	12.5846	80.3118	17.6344	74.325			-0.511118	-1.60725	-0.507997	-1.80617
	12.5773	80.38	17.6329	74.3138			-0.488266	-1.60416	-0.521288	-1.86489
	12.5676	80.4379	17.6558	74.1988			-0.472614	-1.59836	-0.548251	-1.93689
	12.5663	80.5044	17.6905	74.0782			-0.463167	-1.5968	-0.560357	-1.99525
	12.577	80.5494	17.7176	74.0549			-0.465959	-1.60288	-0.540958	-2.02889
	12.5878	80.5777	17.6953	74.0823			-0.488726	-1.60702	-0.506888	-2.02505
	12.5811	80.6488	17.6312	74.1016			-0.520016	-1.60507	-0.501682	-1.99129
	12.5525	80.7644	17.5966	74.1343			-0.531953	-1.5991	-0.536343	-1.95869
	12.5222	80.882	17.611	74.1576			-0.513712	-1.58739	-0.567435	-1.94011
	12.5126	80.9943	17.6217	74.1438			-0.485977	-1.57155	-0.555577	-1.92032
	12.5177	81.104	17.6083	74.1631			-0.471856	-1.56622	-0.512765	-1.89133
	12.5297	81.1936	17.5947	74.2466			-0.472615	-1.57929	-0.472957	-1.86423
	12.5522	81.2804	17.5913	74.3073			-0.475097	-1.60334	-0.464642	-1.84859
	12.576	81.4067	17.6077	74.3105			-0.474301	-1.63113	-0.494112	-1.84886
	12.5951	81.5554	17.6493	74.3052			-0.466882	-1.66138	-0.526546	-1.87007
	12.6213	81.6761	17.6683	74.2852			-0.462104	-1.68766	-0.524585	-1.90365
	12.6458	81.7811	17.6253	74.2395			-0.477169	-1.70584	-0.50425	-1.93
	12.6475	81.9066	17.5768	74.2366			-0.49963	-1.71567	-0.507298	-1.94263
	12.6444	82.0276	17.5846	74.2902			-0.500327	-1.7128	-0.537243	-1.94988
	12.6633	82.125	17.6196	74.3119			-0.482447	-1.6961	-0.568312	-1.9515
	12.6858	82.2199	17.6312	74.2772			-0.46621	-1.67975	-0.579321	-1.94391
	12.687	82.2977	17.6124	74.2426			-0.464908	-1.6757	-0.561438	-1.94098
	12.6659	82.3428	17.5645	74.2055			-0.482796	-1.6796	-0.52994	-1.95412
	12.6347	82.4142	17.5064	74.154			-0.499163	-1.68182	-0.514352	-1.97972
	12.6122	82.5473	17.4906	74.1476			-0.481231	-1.683	-0.522602	-2.0194
	12.6204	82.6985	17.5244	74.1959			-0.442176	-1.69036	-0.52685	-2.06743
	12.6462	82.8483	17.5442	74.2192			-0.425376	-1.70637	-0.51047	-2.0989
	12.6465	83.0147	17.5282	74.2071			-0.449406	-1.73148	-0.491523	-2.09748
	12.6113	83.1662	17.5166	74.2218			-0.500529	-1.75494	-0.493745	-2.07567
	12.5785	83.2768	17.5184	74.2472			-0.555739	-1.75986	-0.522023	-2.05026
	12.5826	83.3759	17.5401	74.2501			-0.586674	-1.74792	-0.556462	-2.02711
	12.6318	83.4842	17.5603	74.2648			-0.585315	-1.73968	-0.565152	-2.01532
	12.7128	83.5776	17.5597	74.2826			-0.566987	-1.74211	-0.534508	-2.01233
	12.7735	83.6547	17.5125	74.2488			-0.544791	-1.74443	-0.49391	-1.99433
	12.7662	83.7313	17.4576	74.2014			-0.515067	-1.73648	-0.481475	-1.95824
	12.7133	83.7851	17.4533	74.2124			-0.476169	-1.71906	-0.503336	-1.93778
	12.6694	83.8025	17.484	74.2457			-0.44584	-1.69772	-0.535427	-1.94886
	12.6521	83.8306	17.4973	74.2486			-0.437158	-1.68548	-0.547479	-1.96666
	12.6619	83.8896	17.4849	74.2463			-0.445345	-1.69372	-0.528425	-1.97205
	12.6872	83.9382	17.462	74.2292			-0.466255	-1.72144	-0.496949	-1.96011
	12.6917	83.983	17.4416	74.1553			-0.495644	-1.7555	-0.479039	-1.92609
	12.6709	84.0669	17.4454	74.0762			-0.512875	-1.78032	-0.473309	-1.89206
	12.6676	84.1705	17.4792	74.0634			-0.512607	-1.79222	-0.462128	-1.89125
	12.6887	84.2733	17.4917	74.0647			-0.508999	-1.79997	-0.44227	-1.91057
	12.7047	84.4036	17.462	74.0183			-0.510209	-1.8088	-0.427409	-1.92397
	12.7035	84.5484	17.4331	73.9711			-0.518968	-1.8148	-0.436767	-1.94929
	12.6898	84.6691	17.4374	73.9626			-0.54087	-1.81046	-0.475296	-1.99623
	12.6647	84.792	17.4525	73.9849			-0.559797	-1.79582	-0.523673	-2.03429
	12.6461	84.945	17.4585	74.0629			-0.552985	-1.78371	-0.549921	-2.04157
	12.6554	85.0839	17.453	74.1794			-0.517462	-1.78516	-0.545285	-2.02099
	12.6737	85.1854	17.4297	74.2216			-0.474174	-1.79294	-0.532196	-1.97415
	12.662	85.264	17.4031	74.1631			-0.449463	-1.79198	-0.532571	-1.91406
	12.6251	85.3089	17.4098	74.0991			-0.460116	-1.77712	-0.543013	-1.87485
	12.6003	85.3052	17.4419	74.0619			-0.495364	-1.75829	-0.545981	-1.86109
	12.6032	85.3056	17.451	74.0314			-0.540688	-1.75394	-0.534225	-1.84673
	12.6263	85.3575	17.4336	74.0495			-0.585269	-1.77074	-0.520108	-1.83235
	12.6612	85.4354	17.4232	74.1179			-0.61609	-1.79472	-0.522871	-1.83657
	12.6901	85.5169	17.4233	74.1398			-0.624616	-1.80674	-0.547264	-1.8519
	12.7045	85.6214	17.4217	74.0863			-0.60752	-1.80643	-0.574325	-1.85907
	12.7266	85.7289	17.4194	74.0282			-0.568992	-1.80211	-0.572294	-1.85703
	12.7615	85.805	17.3991	73.972			-0.535239	-1.7986	-0.531204	-1.83986
	12.7781	85.8748	17.35	73.8988			-0.53399	-1.79731	-0.482046	-1.79475
	12.7613	85.9532	17.3217	73.8678			-0.552651	-1.79899	-0.465957	-1.73964
	12.7379	85.999	17.3554	73.897			-0.560233	-1.80734	-0.485763	-1.70527
	12.7367	86.0245	17.4046	73.9004			-0.540095	-1.82548	-0.511004	-1.69272
	12.755	86.0907	17.4138	73.8607			-0.501389	-1.85079	-0.520309	-1.69178
	12.7662	86.1887	17.3939	73.85			-0.462883	-1.8742	-0.513466	-1.70532
	12.7622	86.2765	17.3685	73.8632			-0.439261	-1.87925	-0.504825	-1.73386
	12.7604	86.3626	17.3484	73.8655			-0.436219	-1.86228	-0.516773	-1.77253
	12.7846	86.4582	17.3431	73.8944			-0.451594	-1.83905	-0.552293	-1.81794
	12.847	86.548	17.3984	73.9378			-0.475881	-1.82809	-0.581162	-1.86181
	12.9211	86.6476	17.411	73.9138			-0.503531	-1.83409	-0.581305	-1.88739
	12.9509	86.7791	17.3791	73.8513			-0.534896	-1.85328	-0.570509	-1.89122
	12.9287	86.9096	17.3686	73.8533			-0.558909	-1.8739	-0.571522	-1.89086
	12.9024	87.0002	17.3902	73.9126			-0.561796	-1.88241	-0.584711	-1.89588
	12.8995	87.0758	17.3984	73.9777			-0.549604	-1.88293	-0.597028	-1.89521
	12.9016	87.1587	17.387	74.0605			-0.530948	-1.89396	-0.594149	-1.88467
	12.8862	87.2221	17.3696	74.1318			-0.523485	-1.9207	-0.567579	-1.87701
	12.8432	87.2592	17.3394	74.117			-0.543026	-1.94507	-0.540863	-1.87965
	12.7847	87.2909	17.3198	74.0456			-0.568843	-1.9509	-0.544375	-1.88505
	12.7523	87.2939	17.339	74.0044			-0.562781	-1.94111	-0.560735	-1.88445
	12.7696	87.2695	17.3593	73.9838			-0.529036	-1.93237	-0.54899	-1.8655
	12.8117	87.2796	17.3413	73.9592			-0.494447	-1.93425	-0.506793	-1.8231
	12.8417	87.3363	17.3159	73.9718			-0.476573	-1.94215	-0.467872	-1.78789
	12.8508	87.3774	17.306	74.011			-0.485039	-1.94015	-0.45616	-1.78848
	12.8542	87.3973	17.2872	74.0182			-0.506535	-1.91517	-0.475689	-1.81177
	12.8679	87.4395	17.2643	74.0242			-0.517215	-1.88074	-0.506483	-1.83267
	12.8947	87.5049	17.2556	74.0729			-0.517822	-1.86747	-0.512089	-1.84837
	12.9135	87.588	17.2348	74.0964			-0.526834	-1.87981	-0.480957	-1.86752
	12.892	87.7079	17.1933	74.0518			-0.542411	-1.89929	-0.442023	-1.89815
	12.8368	87.8443	17.1743	74.0067			-0.549613	-1.9134	-0.428764	-1.95159
	12.8005	87.9485	17.1881	73.9913			-0.540428	-1.92413	-0.443526	-2.02138
	12.8101	88.0198	17.1962	73.9767			-0.523213	-1.93779	-0.462357	-2.07695
	12.8436	88.0902	17.1881	73.9738			-0.512388	-1.95706	-0.458987	-2.10553
	12.8752	88.1516	17.1777	73.9828			-0.521143	-1.97309	-0.436541	-2.12074
	12.8875	88.1954	17.1617	73.9399			-0.558137	-1.96991	-0.429788	-2.11791
	12.8843	88.2541	17.1501	73.8551			-0.614885	-1.94621	-0.456618	-2.07634
	12.8973	88.3308	17.1677	73.826			-0.661757	-1.92159	-0.495604	-2.0082
	12.9391	88.3891	17.1982	73.8602			-0.684009	-1.91371	-0.518025	-1.94022
	12.9679	88.4474	17.2039	73.8813			-0.688219	-1.92306	-0.523376	-1.88388
	12.9599	88.5443	17.1942	73.879			-0.680802	-1.93918	-0.527795	-1.85763
	12.9412	88.6437	17.1992	73.8694			-0.668348	-1.95497	-0.543792	-1.87798
	12.9331	88.7246	17.2151	73.8182			-0.661679	-1.96924	-0.563046	-1.91793
	12.935	88.8195	17.2286	73.7457			-0.657329	-1.98273	-0.559871	-1.94359
	12.9403	88.9255	17.2415	73.7346			-0.65255	-1.99667	-0.525908	-1.9612
	12.9317	89.0109	17.243	73.7722			-0.64942	-2.00257	-0.48485	-1.97028
	12.895	89.1074	17.2203	73.7887			-0.645468	-1.98892	-0.464565	-1.9507
	12.8493	89.229	17.1924	73.7923			-0.628317	-1.96119	-0.468608	-1.91195
	12.8361	89.3272	17.1727	73.7902			-0.591163	-1.93787	-0.480411	-1.87791
	12.8657	89.395	17.1373	73.7369			-0.548678	-1.92954	-0.483369	-1.84588
	12.9022	89.4765	17.0821	73.6701			-0.532843	-1.93712	-0.474931	-1.81138
	12.9221	89.5656	17.0362	73.6794			-0.560072	-1.94933	-0.46764	-1.79424
	12.9383	89.6366	17.0678	73.7289			-0.61377	-1.95047	-0.479309	-1.7978
	12.9656	89.7097	17.1209	73.7366			-0.662654	-1.94516	-0.511866	-1.80158
	13.0061	89.7937	17.1775	73.7213			-0.672626	-1.95055	-0.539425	-1.80486
	13.0495	89.8411	17.2185	73.7081			-0.639986	-1.96584	-0.531826	-1.8182
	13.0592	89.8438	17.2085	73.6662			-0.605374	-1.97252	-0.492773	-1.83248
	13.0164	89.8475	17.1547	73.6364			-0.600524	-1.95911	-0.455073	-1.84174
	12.9614	89.8511	17.116	73.6947			-0.606742	-1.93014	-0.438945	-1.85853
	12.9435	89.8372	17.1126	73.7864			-0.599456	-1.90111	-0.43559	-1.87969
	12.9532	89.8499	17.118	73.8225			-0.576794	-1.89346	-0.430493	-1.88552
	12.9531	89.901	17.1288	73.8262			-0.55568	-1.90899	-0.41894	-1.87487
	12.9312	89.9342	17.1458	73.8189			-0.561613	-1.92875	-0.405532	-1.85412
	12.9002	89.9515	17.1397	73.7729			-0.597664	-1.93488	-0.400927	-1.81507
	12.873	89.994	17.1118	73.7387			-0.628206	-1.92986	-0.413567	-1.76585
	12.8619	90.0329	17.0994	73.7806			-0.622192	-1.92982	-0.428128	-1.73236
	12.8724	90.0378	17.0556	73.8287			-0.586238	-1.9437	-0.425107	-1.72175
	12.8916	90.0441	17.0471	73.8114			-0.559316	-1.96768	-0.412545	-1.72621
	12.9099	90.0538	17.0441	73.7775			-0.566537	-1.98766	-0.409096	-1.74582
	12.947	90.0359	17.0756	73.7519			-0.598852	-1.98882	-0.4099	-1.78084
	13.0046	90.0163	17.1144	73.7124			-0.625221	-1.97352	-0.40528	-1.82254
	13.0414	90.039	17.1352	73.7107			-0.623802	-1.96291	-0.399455	-1.86458
	13.0357	90.0839	17.1396	73.7854			-0.600207	-1.96416	-0.391547	-1.90966
	12.9985	90.1332	17.1113	73.8449			-0.592841	-1.96121	-0.38261	-1.95118
	12.9467	90.2123	17.0556	73.8264			-0.624529	-1.94171	-0.386877	-1.9689
	12.9108	90.3232	17.0299	73.7919			-0.659666	-1.91576	-0.412034	-1.95525
	12.9189	90.4222	17.0463	73.7715			-0.655615	-1.90449	-0.440661	-1.91796
	12.9492	90.5097	17.0438	73.7282			-0.614857	-1.91815	-0.455817	-1.86914
	12.9635	90.6114	17.007	73.6853			-0.572769	-1.94298	-0.453067	-1.82803
	12.967	90.7008	16.9758	73.6774			-0.563525	-1.95409	-0.430423	-1.81198
	12.9866	90.7617	16.9581	73.6547			-0.59195	-1.94004	-0.397313	-1.80969
	13.0306	90.8332	16.9473	73.6054			-0.612484	-1.91503	-0.37284	-1.79413
	13.0865	90.9141	16.9537	73.6035			-0.591853	-1.90226	-0.368035	-1.76647
	13.1247	90.9701	16.9545	73.6459			-0.5567	-1.91068	-0.382146	-1.741
	13.1199	91.0239	16.9182	73.6692			-0.546544	-1.92134	-0.411928	-1.71924
	13.085	91.1069	16.8809	73.6872			-0.564646	-1.91688	-0.448909	-1.70606
	13.0674	91.1891	16.8871	73.7149			-0.585627	-1.90674	-0.477767	-1.70538
	13.0843	91.2597	16.9107	73.6888			-0.580671	-1.90638	-0.493809	-1.70454
	13.104	91.348	16.9191	73.6217			-0.545666	-1.91738	-0.499198	-1.69784
	13.0975	91.448	16.924	73.6132			-0.507827	-1.93265	-0.49885	-1.70697
	13.0745	91.5383	16.9297	73.6607			-0.500719	-1.94335	-0.498083	-1.74252
	13.0526	91.6392	16.9247	73.6904			-0.527312	-1.94635	-0.49959	-1.78363
	13.0542	91.772	16.9229	73.694			-0.561296	-1.94958	-0.497969	-1.81459
	13.0895	91.9098	16.8908	73.677			-0.579612	-1.96097	-0.490474	-1.83964
	13.1202	92.0412	16.8897	73.6112			-0.594489	-1.97617	-0.483241	-1.85598
	13.1107	92.1856	16.8604	73.5316			-0.623129	-1.9837	-0.480166	-1.86593
	13.0895	92.3279	16.8432	73.506			-0.656871	-1.98177	-0.481626	-1.89012
	13.0932	92.4201	16.8572	73.4932			-0.673264	-1.97665	-0.484843	-1.92081
	13.1139	92.4754	16.882	73.4213			-0.660462	-1.97487	-0.482348	-1.92659
	13.1316	92.5216	16.9101	73.3342			-0.626984	-1.98035	-0.469833	-1.91514
	13.1356	92.538	16.9323	73.2907			-0.606556	-1.995	-0.456377	-1.91907
	13.121	92.5363	16.9283	73.2704			-0.621298	-2.01327	-0.455152	-1.93598
	13.1055	92.573	16.91	73.2831			-0.642068	-2.02595	-0.465773	-1.94914
	13.1152	92.6381	16.9087	73.3675			-0.629454	-2.03153	-0.478688	-1.96498
	13.1384	92.6968	16.911	73.4561			-0.5783	-2.03318	-0.486695	-1.9778
	13.1413	92.7668	16.8848	73.4705			-0.520602	-2.03092	-0.488729	-1.97445
	13.1095	92.8509	16.8477	73.4468			-0.492499	-2.02706	-0.49106	-1.97037
	13.0672	92.9042	16.8348	73.4078			-0.499896	-2.02365	-0.503416	-1.97352
	13.0468	92.9324	16.8432	73.3168			-0.519869	-2.01901	-0.528102	-1.95735
	13.0591	92.9697	16.8615	73.2219			-0.533031	-2.0188	-0.55094	-1.91196
	13.093	92.9974	16.8865	73.2011			-0.531779	-2.02986	-0.552438	-1.86947
	13.1263	92.9985	16.8948	73.2099			-0.526109	-2.04501	-0.529117	-1.85522
	13.1373	93.0133	16.8657	73.2002			-0.532584	-2.05834	-0.50091	-1.86959
	13.1391	93.0635	16.8302	73.2259			-0.541045	-2.06895	-0.48392	-1.90985
	13.1648	93.1168	16.8181	73.2998			-0.527049	-2.07557	-0.47065	-1.96058
	13.2096	93.1754	16.8089	73.3627			-0.503394	-2.0784	-0.44676	-1.98981
	13.2323	93.282	16.793	73.4143			-0.49664	-2.08134	-0.419871	-1.99169
	13.2148	93.4278	16.7926	73.4747			-0.513158	-2.08281	-0.402163	-1.9882
	13.18	93.583	16.8019	73.4793			-0.543333	-2.07597	-0.397163	-1.98615
	13.1554	93.7655	16.8034	73.4034			-0.568424	-2.06872	-0.40907	-1.97305
	13.1506	93.9474	16.8093	73.3453			-0.560826	-2.07364	-0.437778	-1.94625
	13.1632	94.0458	16.8098	73.3481			-0.528225	-2.08955	-0.472806	-1.90525
	13.1779	94.0699	16.771	73.3608			-0.506161	-2.10446	-0.510553	-1.84482
	13.1723	94.1024	16.7199	73.3762			-0.511734	-2.11179	-0.552972	-1.78263
	13.1564	94.1528	16.7172	73.3943			-0.527315	-2.11293	-0.582095	-1.75464
	13.1703	94.2071	16.7538	73.3407			-0.525693	-2.11106	-0.581426	-1.77323
	13.221	94.289	16.7861	73.2255			-0.501496	-2.11231	-0.564538	-1.82283
	13.275	94.3878	16.8125	73.1747			-0.470527	-2.12057	-0.549705	-1.88482
	13.3199	94.4647	16.8326	73.209			-0.454203	-2.12533	-0.534746	-1.94074
	13.3546	94.5527	16.8234	73.2414			-0.457859	-2.11788	-0.520449	-1.97003
	13.3689	94.6918	16.8006	73.2524			-0.462474	-2.10882	-0.51727	-1.96229
	13.3768	94.8382	16.7902	73.2525			-0.446641	-2.10977	-0.52186	-1.92249
	13.3917	94.9457	16.7676	73.2079			-0.429466	-2.12033	-0.528245	-1.85781
	13.386	95.0343	16.7206	73.152			-0.43893	-2.13816	-0.540678	-1.77619
	13.3495	95.1154	16.6935	73.1716			-0.468907	-2.15362	-0.552181	-1.69922
	13.3194	95.18	16.6826	73.2405			-0.498643	-2.15328	-0.542945	-1.64138
	13.3236	95.2654	16.6995	73.2662			-0.511878	-2.13846	-0.511618	-1.596
	13.3504	95.4061	16.6947	73.2401			-0.490688	-2.12792	-0.48004	-1.56547
	13.3761	95.5505	16.6775	73.1817			-0.449193	-2.13017	-0.462806	-1.56777
	13.3706	95.6624	16.6306	73.0523			-0.424348	-2.13498	-0.461802	-1.60407
	13.3192	95.768	16.5728	72.868			-0.419538	-2.13843	-0.468457	-1.65301
	13.2566	95.8407	16.5538	72.7131			-0.410724	-2.15154	-0.470711	-1.69504
	13.2345	95.8306	16.5644	72.5813			-0.39613	-2.18446	-0.467569	-1.7104
	13.2488	95.7705	16.5519	72.4163			-0.386235	-2.2287	-0.469891	-1.68931
	13.2566	95.7089	16.5118	72.2494			-0.39958	-2.26185	-0.479569	-1.65934
	13.2334	95.6359	16.4668	72.1101			-0.447707	-2.26896	-0.486043	-1.6539
	13.1762	95.5755	16.4226	71.9395			-0.505233	-2.25303	-0.485981	-1.66593
	13.1065	95.5691	16.3908	71.725			-0.530565	-2.22984	-0.486447	-1.6736
	13.0764	95.5875	16.3802	71.5198			-0.518187	-2.21378	-0.497417	-1.67692
	13.1073	95.5865	16.3557	71.3088			-0.49898	-2.20461	-0.524145	-1.67805
	13.1434	95.5886	16.2611	71.0691			-0.499791	-2.19919	-0.554829	-1.67145
	13.1376	95.6062	16.1941	70.8607			-0.51765	-2.19835	-0.565279	-1.66876
	13.1066	95.6006	16.1417	70.7015			-0.529573	-2.20189	-0.551866	-1.68009
	13.0735	95.5624	16.0997	70.5335			-0.520884	-2.20639	-0.539245	-1.68412
	13.0479	95.5258	16.0557	70.3583			-0.490765	-2.20981	-0.547348	-1.66263
	13.0395	95.4861	16.0149	70.2123			-0.459071	-2.21161	-0.572938	-1.63366
	13.0245	95.4324	15.9764	70.0452			-0.45708	-2.21103	-0.596474	-1.61013
	12.972	95.4021	15.9456	69.8144			-0.48502	-2.20911	-0.599086	-1.59244
	12.9008	95.4062	15.9451	69.5809			-0.505274	-2.20887	-0.582798	-1.59765
	12.8543	95.3893	15.959	69.377			-0.495262	-2.21155	-0.572415	-1.63158
	12.836	95.353	15.9277	69.1533			-0.464498	-2.21611	-0.586033	-1.66897
	12.8296	95.3373	15.8377	68.9217			-0.435026	-2.21943	-0.608998	-1.69925
	12.8239	95.3148	15.7421	68.7324			-0.423272	-2.22271	-0.614438	-1.73964
	12.8043	95.2555	15.6856	68.5434			-0.42795	-2.2297	-0.592717	-1.7818
	12.7608	95.186	15.6694	68.3251			-0.435984	-2.23796	-0.556973	-1.7976
	12.7083	95.1034	15.6786	68.1507			-0.449383	-2.23942	-0.525275	-1.78865
	12.6619	94.9776	15.6784	68.0372			-0.470974	-2.23157	-0.506536	-1.76681
	12.6134	94.8426	15.6286	67.913			-0.500087	-2.21966	-0.497877	-1.73018
	12.559	94.7363	15.5444	67.7666			-0.526538	-2.21287	-0.491845	-1.69106
	12.5252	94.6277	15.4791	67.61			-0.529575	-2.21478	-0.484415	-1.67547
	12.5239	94.4952	15.4369	67.3893			-0.502036	-2.21587	-0.482508	-1.68438
	12.5245	94.3773	15.3854	67.1153			-0.474452	-2.21327	-0.502016	-1.69829
	12.4992	94.2882	15.3287	66.8902			-0.469188	-2.21407	-0.544676	-1.71338
	12.4482	94.2074	15.2787	66.7266			-0.485457	-2.2237	-0.585365	-1.73016
	12.3876	94.1481	15.2171	66.563			-0.512845	-2.24019	-0.599185	-1.73657
	12.3427	94.1345	15.1501	66.408			-0.533207	-2.25827	-0.589923	-1.72797
	12.3396	94.1288	15.103	66.2874			-0.541125	-2.26778	-0.574026	-1.7089
	12.3725	94.1082	15.0487	66.1535			-0.555152	-2.2563	-0.563381	-1.6717
	12.4051	94.1105	14.9767	65.9961			-0.58145	-2.22689	-0.56243	-1.61344
	12.3994	94.1349	14.9142	65.8745			-0.589284	-2.19671	-0.55563	-1.55823
	12.3554	94.1296	14.8857	65.7654			-0.558709	-2.17826	-0.519979	-1.52993
	12.299	94.1103	14.8585	65.5855			-0.502289	-2.17461	-0.469326	-1.52605
	12.2466	94.1089	14.8234	65.3474			-0.453597	-2.18386	-0.445149	-1.53577
	12.2027	94.0938	14.7956	65.0974			-0.438439	-2.19905	-0.456133	-1.55614
	12.167	94.0501	14.7653	64.8181			-0.455469	-2.2087	-0.478254	-1.57693
	12.1258	94.0107	14.7192	64.5347			-0.481618	-2.20947	-0.49406	-1.58104
	12.081	93.9619	14.7257	64.324			-0.496661	-2.20675	-0.498705	-1.56645
	12.0623	93.8726	14.7294	64.1585			-0.493911	-2.20245	-0.496755	-1.53515
	12.0719	93.777	14.6788	63.968			-0.484505	-2.19462	-0.501017	-1.48556
	12.0674	93.7135	14.5886	63.7835			-0.471453	-2.19153	-0.513533	-1.43227
	12.0254	93.6599	14.511	63.6375			-0.450502	-2.19725	-0.513436	-1.40085
	11.9563	93.6131	14.453	63.4834			-0.433738	-2.20199	-0.496861	-1.39752
	11.8817	93.6126	14.4147	63.3172			-0.437169	-2.20295	-0.488515	-1.40974
	11.8308	93.6463	14.41	63.1808			-0.45322	-2.20443	-0.502306	-1.43583
	11.819	93.6637	14.4103	63.0352			-0.479506	-2.20483	-0.522764	-1.4694
	11.8247	93.6714	14.3828	62.8269			-0.51189	-2.20089	-0.530884	-1.49194
	11.8226	93.6947	14.3575	62.5984			-0.527858	-2.19926	-0.522843	-1.50196
	11.8152	93.6931	14.3534	62.3915			-0.520121	-2.20483	-0.503256	-1.50346
	11.8112	93.6516	14.3246	62.1706			-0.507808	-2.21304	-0.48733	-1.48319
	11.7997	93.613	14.2527	61.9267			-0.503405	-2.22039	-0.485315	-1.43579
	11.7738	93.5795	14.1747	61.6969			-0.518485	-2.22744	-0.489971	-1.38618
	11.7461	93.5347	14.1171	61.4673			-0.560974	-2.23024	-0.486795	-1.35732
	11.7283	93.5171	14.0889	61.2319			-0.602803	-2.22464	-0.477301	-1.34892
	11.7308	93.5265	14.0977	61.061			-0.61255	-2.21355	-0.472508	-1.36452
	11.7605	93.4971	14.1122	60.9716			-0.596562	-2.20841	-0.477848	-1.4034
	11.789	93.4238	14.0836	60.8833			-0.580187	-2.21598	-0.488891	-1.4407
	11.7713	93.3628	14.0252	60.7609			-0.573599	-2.23425	-0.48878	-1.45351
	11.7146	93.3135	13.9879	60.6283			-0.570267	-2.25555	-0.466673	-1.4416
	11.6605	93.2596	13.9728	60.4592			-0.561431	-2.2661	-0.435974	-1.40192
	11.6304	93.2271	13.9462	60.2434			-0.548817	-2.25833	-0.418186	-1.33559
	11.624	93.2236	13.8986	60.0409			-0.538637	-2.24323	-0.417797	-1.27664
	11.6271	93.2093	13.8349	59.8603			-0.540157	-2.23309	-0.422122	-1.25135
	11.6012	93.1844	13.762	59.6611			-0.561446	-2.23025	-0.419024	-1.24043
	11.5445	93.168	13.7105	59.4795			-0.588482	-2.23406	-0.404163	-1.22842
	11.5088	93.1236	13.7006	59.3621			-0.597649	-2.24563	-0.38876	-1.23064
	11.5168	93.0249	13.6984	59.2505			-0.589886	-2.26207	-0.389444	-1.24493
	11.5272	92.9227	13.6622	59.0941			-0.569432	-2.27796	-0.407183	-1.25815
	11.502	92.8427	13.6028	58.9371			-0.541604	-2.287	-0.424866	-1.28116
	11.4424	92.7418	13.5443	58.7863			-0.519517	-2.28345	-0.428746	-1.31021
	11.3735	92.6278	13.4917	58.5919			-0.510277	-2.27089	-0.421681	-1.31632
	11.3254	92.5404	13.4562	58.3784			-0.499193	-2.25797	-0.417653	-1.29945
	11.315	92.4565	13.4413	58.2018			-0.483742	-2.24917	-0.430976	-1.28811
	11.3129	92.3637	13.4172	58.0376			-0.475036	-2.24143	-0.464641	-1.29036
	11.27	92.3011	13.3646	57.8754			-0.482584	-2.23278	-0.503483	-1.29872
	11.1919	92.2507	13.3123	57.7574			-0.502696	-2.22197	-0.524172	-1.31678
	11.1327	92.1703	13.2814	57.6499			-0.522676	-2.2126	-0.518854	-1.33445
	11.1204	92.0955	13.2511	57.4846			-0.535737	-2.2102	-0.499507	-1.32644
	11.1333	92.0679	13.2142	57.2946			-0.541272	-2.21941	-0.47957	-1.29208
	11.1398	92.0462	13.1886	57.132			-0.535963	-2.23754	-0.457659	-1.25736
	11.1149	92.0046	13.167	56.9631			-0.525988	-2.25235	-0.43265	-1.23952
	11.06	91.9624	13.134	56.7827			-0.5284	-2.25749	-0.420908	-1.2426
	11.0132	91.9042	13.1034	56.641			-0.539096	-2.25672	-0.435115	-1.26673
	11.0016	91.8029	13.0739	56.5147			-0.548721	-2.2524	-0.461531	-1.29409
	10.9939	91.7007	13.0222	56.3539			-0.556161	-2.24612	-0.475115	-1.29629
	10.9484	91.635	12.9215	56.1924			-0.554432	-2.23821	-0.464359	-1.27896
	10.8734	91.5725	12.9223	56.0613			-0.542718	-2.227	-0.431162	-1.27368
	10.8111	91.497	12.9266	55.9178			-0.538425	-2.21321	-0.390173	-1.2889
	10.7817	91.446	12.904	55.7553			-0.54155	-2.20721	-0.365633	-1.31064
	10.7698	91.4041	12.881	55.6202			-0.538387	-2.21282	-0.360065	-1.32586
	10.7525	91.3285	12.8655	55.4847			-0.52673	-2.21827	-0.357932	-1.32464
	10.7195	91.2479	12.8388	55.3006			-0.513173	-2.21567	-0.360595	-1.30649
	10.683	91.1965	12.8192	55.1152			-0.493591	-2.2136	-0.380259	-1.29016
	10.6792	91.1472	12.8254	54.9658			-0.46739	-2.22476	-0.402623	-1.29413
	10.7062	91.1033	12.8188	54.8058			-0.438035	-2.24813	-0.40682	-1.3127
	10.7071	91.0997	12.7749	54.6323			-0.414521	-2.27168	-0.396459	-1.32691
	10.6517	91.1075	12.7206	54.4964			-0.404364	-2.28327	-0.382271	-1.33414
	10.5751	91.0845	12.6599	54.3761			-0.414346	-2.27922	-0.372331	-1.33991
	10.5217	91.0402	12.5763	54.2306			-0.441221	-2.26415	-0.376788	-1.34039
	10.5092	90.9751	12.5008	54.0846			-0.467268	-2.25231	-0.396367	-1.33141
	10.5283	90.8553	12.4623	53.9301			-0.478539	-2.25033	-0.413803	-1.31117
	10.5384	90.7094	12.4338	53.6736			-0.485041	-2.24614	-0.421949	-1.27344
	10.5067	90.6099	12.4055	53.4088			-0.496449	-2.23323	-0.42982	-1.22583
	10.4521	90.5652	12.397	53.1739			-0.508552	-2.22319	-0.43658	-1.19966
	10.4126	90.5419	12.3871	53.0051			-0.521437	-2.22442	-0.432923	-1.20712
	10.4015	90.5406	12.3516	52.8828			-0.526794	-2.23439	-0.417998	-1.2223
	10.4049	90.5519	12.3244	52.7979			-0.515395	-2.24604	-0.401894	-1.22809
	10.4003	90.5303	12.3258	52.711			-0.50284	-2.25386	-0.394087	-1.22374
	10.3721	90.474	12.3243	52.569			-0.507709	-2.25493	-0.401641	-1.20513
	10.3266	90.4243	12.3099	52.4076			-0.519866	-2.25411	-0.418109	-1.17939
	10.288	90.3604	12.2949	52.2938			-0.522212	-2.25576	-0.423122	-1.16331
	10.2625	90.2497	12.2616	52.1864			-0.510936	-2.25493	-0.410476	-1.1531
	10.2318	90.1198	12.2025	52.0295			-0.493433	-2.24613	-0.395368	-1.1381
	10.1862	89.9966	12.1484	51.8631			-0.487079	-2.23508	-0.396609	-1.13319
	10.1608	89.8714	12.113	51.7165			-0.504479	-2.23317	-0.416123	-1.15069
	10.1533	89.7758	12.0779	51.5645			-0.5319	-2.24441	-0.437554	-1.17285
	10.1422	89.7387	12.0416	51.4231			-0.547187	-2.26354	-0.437932	-1.18699
	10.1205	89.7153	12.0106	51.3163			-0.542961	-2.28526	-0.417191	-1.20065
	10.0871	89.6619	11.9725	51.201			-0.539304	-2.29893	-0.399112	-1.20837
	10.0485	89.5964	11.9299	51.0562			-0.551702	-2.29418	-0.399032	-1.20226
	10.0369	89.5237	11.9176	50.9254			-0.568896	-2.27885	-0.408877	-1.20073
	10.0626	89.4172	11.9387	50.8051			-0.570091	-2.26492	-0.412258	-1.21112
	10.0859	89.2976	11.9547	50.6629			-0.559014	-2.25322	-0.401259	-1.21199
	10.0739	89.2013	11.9514	50.5358			-0.545048	-2.24008	-0.383266	-1.20427
	10.0374	89.1013	11.9355	50.4492			-0.53649	-2.22694	-0.378774	-1.21407
	9.99943	88.9766	11.8965	50.3393			-0.538786	-2.2179	-0.398622	-1.2378
	9.97424	88.8707	11.8325	50.1763			-0.546069	-2.22165	-0.427656	-1.25925
	9.96951	88.7998	11.7743	50.015			-0.549074	-2.23747	-0.440635	-1.29052
	9.96589	88.7333	11.7311	49.8708			-0.553877	-2.25064	-0.433122	-1.32797
	9.92841	88.6792	11.7057	49.7179			-0.571399	-2.25136	-0.428276	-1.34485
	9.84785	88.6512	11.6813	49.5858			-0.595893	-2.24829	-0.44614	-1.33949
	9.76676	88.5971	11.6633	49.4947			-0.612005	-2.25306	-0.476193	-1.32849
	9.72616	88.5045	11.6327	49.3922			-0.609525	-2.26672	-0.489397	-1.31216
	9.71815	88.4289	11.5834	49.2719			-0.595447	-2.28099	-0.471833	-1.29516
	9.71359	88.3827	11.5419	49.1829			-0.580922	-2.2861	-0.440041	-1.29714
	9.70358	88.3415	11.5151	49.0889			-0.574559	-2.27924	-0.42352	-1.31645
	9.68481	88.3325	11.4775	48.9236			-0.579889	-2.26981	-0.436212	-1.32977
	9.65906	88.3593	11.4352	48.7222			-0.580324	-2.26655	-0.460348	-1.33001
	9.63397	88.3617	11.4171	48.5372			-0.551754	-2.26951	-0.462554	-1.32285
	9.60665	88.3233	11.4154	48.3594			-0.514393	-2.26822	-0.437055	-1.30334
	9.5707	88.287	11.4128	48.2023			-0.507306	-2.2584	-0.418923	-1.27136
	9.54629	88.2423	11.4176	48.0958			-0.530986	-2.24694	-0.434718	-1.2473
	9.55577	88.157	11.4161	47.9906			-0.556282	-2.23851	-0.470514	-1.24565
	9.58295	88.0656	11.3828	47.8458			-0.563571	-2.24035	-0.499771	-1.25949
	9.58678	88.001	11.3428	47.7087			-0.539438	-2.25747	-0.50919	-1.28386
	9.55738	87.9289	11.3218	47.6058			-0.503901	-2.27907	-0.49369	-1.3169
	9.51817	87.8404	11.2878	47.502			-0.495845	-2.29069	-0.466985	-1.34335
	9.48755	87.7719	11.2243	47.4096			-0.521634	-2.29876	-0.452045	-1.35475
	9.47074	87.7102	11.1683	47.3631			-0.551464	-2.31399	-0.441621	-1.36248
	9.47123	87.6298	11.1348	47.3061			-0.565324	-2.33289	-0.415343	-1.36809
	9.47266	87.5681	11.1106	47.1788			-0.567229	-2.34722	-0.387696	-1.36116
	9.45032	87.5359	11.1043	47.0275			-0.575145	-2.3546	-0.389632	-1.34372
	9.42302	87.4739	11.1103	46.8468			-0.601083	-2.35501	-0.419872	-1.32441
	9.41498	87.3778	11.089	46.7378			-0.632227	-2.35063	-0.45721	-1.30143
	9.40656	87.2929	11.0443	46.6207			-0.639462	-2.34116	-0.481781	-1.27246
	9.38227	87.2115	11.0196	46.5185			-0.613539	-2.32223	-0.478966	-1.24603
	9.35438	87.1221	11.011	46.4089			-0.585857	-2.29264	-0.461186	-1.23125
	9.32976	87.067	10.9858	46.2751			-0.588311	-2.26303	-0.462026	-1.23169
	9.3178	87.0494	10.9551	46.1499			-0.607483	-2.25191	-0.489318	-1.2586
	9.33288	87.0194	10.9289	46.0224			-0.610303	-2.26831	-0.509091	-1.30993
	9.35388	86.9699	10.8868	45.8447			-0.59075	-2.29607	-0.493676	-1.35308
	9.33886	86.9239	10.8434	45.6369			-0.560643	-2.31796	-0.452952	-1.36055
	9.28553	86.8497	10.8301	45.4502			-0.547425	-2.33041	-0.418908	-1.34391
	9.21389	86.7348	10.8221	45.2755			-0.579978	-2.33562	-0.425188	-1.32799
	9.13615	86.629	10.7929	45.1121			-0.640681	-2.33824	-0.475325	-1.32351
	9.07292	86.5527	10.7658	45.0036			-0.6738	-2.33851	-0.532679	-1.33668
	9.0523	86.4725	10.7567	44.9351			-0.657169	-2.3252	-0.552491	-1.35441
	9.05982	86.3975	10.7473	44.8449			-0.607443	-2.29084	-0.530297	-1.34745
	9.05509	86.3585	10.7344	44.7388			-0.560688	-2.24677	-0.493744	-1.32219
	9.03218	86.3294	10.7185	44.6516			-0.549027	-2.21363	-0.466419	-1.3133
	9.00906	86.2899	10.6807	44.5515			-0.568319	-2.20104	-0.451704	-1.32627
	8.98738	86.2649	10.6347	44.4199			-0.574701	-2.20213	-0.434128	-1.34265
	8.9738	86.2405	10.619	44.3027			-0.554239	-2.20619	-0.405709	-1.35902
	8.97761	86.174	10.6313	44.1972			-0.535291	-2.21381	-0.383414	-1.36891
	8.98372	86.0853	10.6246	44.049			-0.542299	-2.23377	-0.384945	-1.35591
	8.98439	86.0099	10.5829	43.8594			-0.560347	-2.26559	-0.399801	-1.33305
	8.99074	85.9293	10.5287	43.6613			-0.553637	-2.29952	-0.407163	-1.32826
	8.98237	85.8445	10.4808	43.4696			-0.509978	-2.31706	-0.400813	-1.33301
	8.93943	85.7944	10.4533	43.3263			-0.456354	-2.30394	-0.39032	-1.32379
	8.89146	85.7712	10.4566	43.2571			-0.43127	-2.27071	-0.39481	-1.30896
	8.86325	85.7399	10.4631	43.1978			-0.452306	-2.24121	-0.424159	-1.29865
	8.83953	85.7144	10.4384	43.09			-0.503661	-2.22137	-0.461797	-1.29123
	8.80621	85.7092	10.402	42.9688			-0.546569	-2.203	-0.479752	-1.29698
	8.76875	85.681	10.3913	42.86			-0.5629	-2.17602	-0.471787	-1.31984
	8.72715	85.6142	10.3948	42.6624			-0.564359	-2.13985	-0.45984	-1.33022
	8.68811	85.5347	10.3839	42.5359			-0.557575	-2.10966	-0.465131	-1.31117
	8.6622	85.4373	10.3546	42.457			-0.530944	-2.10319	-0.480809	-1.2894
	8.64715	85.306	10.3096	42.3936			-0.478941	-2.11611	-0.480386	-1.28015
	8.6309	85.1812	10.2555	42.307			-0.41773	-2.13151	-0.454684	-1.27228
	8.61961	85.0821	10.2205	42.239			-0.385826	-2.13919	-0.423934	-1.27429
	8.63046	84.9656	10.2115	42.1675			-0.404727	-2.1448	-0.412344	-1.29921
	8.65858	84.8359	10.1877	42.1198			-0.454409	-2.15962	-0.425218	-1.33264
	8.67325	84.7571	10.1329	42.0039			-0.492507	-2.18687	-0.447197	-1.35371
	8.66083	84.7304	10.0909	41.8826			-0.492991	-2.21068	-0.454476	-1.35733
	8.62689	84.713	10.0887	41.7744			-0.467079	-2.20739	-0.438985	-1.33949
	8.57629	84.6978	10.0992	41.6684			-0.463429	-2.17495	-0.420848	-1.30343
	8.5148	84.6711	10.0968	41.5786			-0.500221	-2.13417	-0.426993	-1.27668
	8.45437	84.5937	10.0697	41.4836			-0.544663	-2.10751	-0.458684	-1.27513
	8.40163	84.4856	10.009	41.3424			-0.564046	-2.09499	-0.495481	-1.27648
	8.36569	84.4017	9.94982	41.1954			-0.557503	-2.08807	-0.520828	-1.26061
	8.3653	84.3321	9.94476	41.1007			-0.536573	-2.08416	-0.526045	-1.23967
	8.40957	84.249	9.96464	41.0162			-0.525343	-2.08281	-0.516666	-1.22555
	8.47315	84.1785	9.94122	40.8945			-0.531745	-2.08961	-0.513619	-1.21419
	8.50764	84.1314	9.87533	40.7655			-0.526015	-2.11149	-0.520044	-1.20456
	8.49711	84.0701	9.80319	40.6435			-0.491343	-2.13537	-0.507037	-1.20128
	8.46861	83.9974	9.73618	40.4991			-0.451574	-2.1454	-0.465248	-1.19692
	8.43898	83.9402	9.69325	40.3449			-0.434387	-2.14684	-0.430886	-1.18355
	8.40323	83.8679	9.68954	40.21			-0.44377	-2.14959	-0.430274	-1.16463
	8.35991	83.754	9.68584	40.0627			-0.460141	-2.14817	-0.44971	-1.13962
	8.30354	83.6477	9.64979	39.8941			-0.454874	-2.13567	-0.461648	-1.10581
	8.23666	83.5726	9.62004	39.7336			-0.421766	-2.11035	-0.448463	-1.07733
	8.19337	83.4914	9.62605	39.6997			-0.389626	-2.07566	-0.415034	-1.0672
	8.19251	83.4088	9.63696	39.6643			-0.394386	-2.04232	-0.397649	-1.07033
	8.20382	83.365	9.63026	39.6134			-0.43678	-2.02744	-0.421937	-1.07959
	8.20584	83.3351	9.60815	39.5589			-0.477235	-2.03491	-0.460495	-1.09882
	8.19708	83.2896	9.56174	39.4381			-0.4773	-2.05323	-0.475264	-1.12328
	8.17313	83.2459	9.50913	39.3127			-0.444959	-2.07289	-0.468152	-1.13764
	8.1412	83.1973	9.49941	39.1832			-0.418461	-2.09625	-0.4681	-1.14348
	8.1218	83.1081	9.52314	39.0626			-0.437506	-2.12502	-0.487542	-1.14506
	8.10898	83.0008	9.51334	38.8567			-0.491736	-2.14965	-0.513762	-1.13489
	8.08228	82.9134	9.45565	38.7269			-0.518303	-2.16388	-0.523477	-1.11891
	8.04692	82.8181	9.38834	38.6558			-0.474668	-2.17008	-0.499992	-1.11584
	8.03003	82.6962	9.33268	38.6058			-0.39907	-2.16888	-0.458415	-1.12232
	8.03892	82.5893	9.30605	38.5558			-0.345757	-2.16354	-0.425679	-1.11925
	8.0558	82.5136	9.31921	38.5191			-0.331384	-2.15624	-0.4095	-1.10954
	8.05573	82.45	9.3364	38.4667			-0.339721	-2.13996	-0.397217	-1.10259
	8.01834	82.415	9.31969	38.3531			-0.339941	-2.11246	-0.381751	-1.09478
	7.952	82.4229	9.29271	38.2075			-0.321534	-2.08437	-0.368608	-1.09494
	7.90756	82.424	9.28775	38.0809			-0.316605	-2.06923	-0.372835	-1.11274
	7.90724	82.3912	9.28859	37.9603			-0.351259	-2.06963	-0.406201	-1.12727
	7.91143	82.3558	9.27408	37.8338			-0.405073	-2.07726	-0.455757	-1.11629
	7.89105	82.3166	9.25126	37.7294			-0.435586	-2.08277	-0.492136	-1.09151
	7.8595	82.2489	9.22324	37.6336			-0.422293	-2.08658	-0.5015	-1.06233
	7.82915	82.1882	9.18961	37.5135			-0.383908	-2.09756	-0.493943	-1.02082
	7.81195	82.1677	9.16658	37.395			-0.357373	-2.11872	-0.48437	-0.977864
	7.81492	82.15	9.1581	37.2972			-0.362402	-2.14209	-0.478713	-0.956232
	7.79738	82.1231	9.13967	37.184			-0.386907	-2.15308	-0.470433	-0.948121
	7.73025	82.1149	9.10402	37.0647			-0.401088	-2.13996	-0.446787	-0.937626
	7.65758	82.1091	9.07408	36.9894			-0.392536	-2.11333	-0.411363	-0.93117
	7.63007	82.0703	9.05652	36.9342			-0.389122	-2.09214	-0.385422	-0.917819
	7.64176	82.0218	9.03501	36.8486			-0.41462	-2.0849	-0.385365	-0.870887
	7.66317	81.9765	9.00918	36.7481			-0.447949	-2.08865	-0.405326	-0.801864
	7.66772	81.8998	8.98372	36.6472			-0.458683	-2.09562	-0.428844	-0.739311
	7.64337	81.8001	8.95436	36.5276			-0.450998	-2.09816	-0.446429	-0.687274
	7.60645	81.7258	8.93653	36.4103			-0.444392	-2.1016	-0.458146	-0.652253
	7.59356	81.6726	8.95292	36.3455			-0.458397	-2.1156	-0.468589	-0.658586
	7.60388	81.6281	8.9814	36.2988			-0.485958	-2.13774	-0.480242	-0.698792
	7.59537	81.6224	8.97676	36.2238			-0.497472	-2.15883	-0.490368	-0.737729
	7.55009	81.6453	8.94116	36.1494			-0.470884	-2.16668	-0.490363	-0.765125
	7.50362	81.6307	8.90776	36.0855			-0.424145	-2.157	-0.478122	-0.786749
	7.48522	81.5755	8.88136	35.9892			-0.395705	-2.13751	-0.465717	-0.797779
	7.48294	81.5281	8.85377	35.8696			-0.411033	-2.12199	-0.466885	-0.798024
	7.4743	81.4809	8.82715	35.7687			-0.45118	-2.1138	-0.477912	-0.800279
	7.447	81.4117	8.78636	35.6632			-0.47085	-2.10492	-0.487848	-0.806358
	7.4076	81.3462	8.72311	35.5406			-0.449337	-2.09281	-0.499123	-0.810604
	7.39056	81.2879	8.6837	35.451			-0.405079	-2.08623	-0.518848	-0.821255
	7.41974	81.2078	8.69049	35.3931			-0.377774	-2.09085	-0.539534	-0.84815
	7.46528	81.1247	8.70066	35.3161			-0.3966	-2.09979	-0.549057	-0.878492
	7.47956	81.0681	8.67963	35.2521			-0.442115	-2.10524	-0.548309	-0.898627
	7.45303	81.0113	8.64541	35.2122			-0.468999	-2.11171	-0.540492	-0.909144
	7.41745	80.9397	8.60889	35.1564			-0.471086	-2.12195	-0.528176	-0.905048
	7.40478	80.8931	8.57688	35.0576			-0.47449	-2.13754	-0.521974	-0.87931
	7.41156	80.8731	8.57935	34.9659			-0.489606	-2.15357	-0.524188	-0.846671
	7.41383	80.8331	8.60126	34.8693			-0.507966	-2.15015	-0.520364	-0.825843
	7.39844	80.7707	8.58053	34.7425			-0.515334	-2.11256	-0.507747	-0.813074
	7.36786	80.7103	8.51843	34.6202			-0.502797	-2.06008	-0.499414	-0.79611
	7.35094	80.6307	8.47293	34.5471			-0.487432	-2.02373	-0.490204	-0.771102
	7.3646	80.5282	8.45641	34.4928			-0.486928	-2.01539	-0.466939	-0.734699
	7.37189	80.4506	8.44836	34.4306			-0.495712	-2.0274	-0.43489	-0.690846
	7.32883	80.4092	8.44695	34.3841			-0.490657	-2.04403	-0.406999	-0.661717
	7.25872	80.3652	8.43777	34.3356			-0.468655	-2.05487	-0.389568	-0.658651
	7.21666	80.3168	8.40152	34.245			-0.448144	-2.06384	-0.393738	-0.666223
	7.22616	80.2733	8.37248	34.1319			-0.454303	-2.08497	-0.425815	-0.675867
	7.26742	80.1948	8.37875	34.0267			-0.485941	-2.1212	-0.46623	-0.698733
	7.28526	80.0715	8.37221	33.9073			-0.519198	-2.15385	-0.491852	-0.735668
	7.23747	79.952	8.31773	33.7774			-0.523023	-2.16477	-0.498498	-0.770116
	7.1578	79.8469	8.25466	33.678			-0.488857	-2.15719	-0.494927	-0.794656
	7.11566	79.7357	8.21971	33.5912			-0.453383	-2.14481	-0.487321	-0.803705
	7.13005	79.6393	8.20947	33.4799			-0.459309	-2.13309	-0.47721	-0.787273
	7.15638	79.5828	8.21752	33.3685			-0.494982	-2.11965	-0.462455	-0.764936
	7.14364	79.535	8.21496	33.2824			-0.517646	-2.10012	-0.446122	-0.76881
	7.08362	79.4798	8.15873	33.1972			-0.50888	-2.06942	-0.445391	-0.795446
	7.01779	79.4384	8.07425	33.1082			-0.480256	-2.04282	-0.472137	-0.82073
	6.99412	79.3947	8.03315	33.0455			-0.464801	-2.0452	-0.513953	-0.838924
	7.0162	79.3126	8.04201	32.9946			-0.489342	-2.0767	-0.543775	-0.845462
	7.0321	79.209	8.05645	32.9183			-0.533682	-2.11039	-0.543193	-0.834411
	7.00111	79.1105	8.05642	32.8304			-0.558437	-2.12547	-0.515653	-0.822816
	6.95691	78.9955	8.04023	32.7487			-0.561248	-2.12288	-0.480784	-0.821405
	6.95174	78.8696	8.00783	32.653			-0.563497	-2.11973	-0.456623	-0.806048
	6.99008	78.778	7.98169	32.551			-0.570584	-2.1261	-0.442004	-0.765205
	7.03849	78.7248	7.97903	32.4759			-0.566172	-2.13604	-0.430428	-0.7226
	7.0512	78.6869	7.97167	32.3987			-0.538816	-2.13079	-0.425233	-0.689222
	6.99927	78.681	7.93007	32.2785			-0.500118	-2.1013	-0.43514	-0.658444
	6.92138	78.7022	7.88066	32.1431			-0.481966	-2.06223	-0.458713	-0.64667
	6.88268	78.6945	7.85905	32.0148			-0.504554	-2.04132	-0.481362	-0.674074
	6.88453	78.6505	7.86019	31.8689			-0.563	-2.04831	-0.486782	-0.729002
	6.8835	78.6062	7.86489	31.7183			-0.616342	-2.06563	-0.471339	-0.789427
	6.86402	78.5427	7.86109	31.6038			-0.626878	-2.07271	-0.456195	-0.842009
	6.83181	78.4328	7.83643	31.508			-0.600545	-2.06588	-0.466374	-0.859527
	6.8008	78.3115	7.79702	31.4118			-0.573596	-2.06086	-0.502718	-0.828643
	6.78625	78.2088	7.77691	31.345			-0.561286	-2.07514	-0.542257	-0.786668
	6.78452	78.1128	7.77977	31.3026			-0.560801	-2.10315	-0.562762	-0.764234
	6.76926	78.048	7.76404	31.2326			-0.56144	-2.11931	-0.559544	-0.743583
	6.72952	78.0432	7.71608	31.1404			-0.552391	-2.11514	-0.542485	-0.707794
	6.69425	78.0517	7.66939	31.0724			-0.543359	-2.10525	-0.520611	-0.673273
	6.69659	78.0264	7.64582	31.0081			-0.560341	-2.10533	-0.498105	-0.656284
	6.72107	77.9904	7.64333	30.925			-0.604581	-2.11968	-0.479577	-0.663674
	6.7271	77.9524	7.65759	30.8592			-0.638626	-2.13649	-0.465199	-0.703705
	6.70515	77.8846	7.66866	30.8112			-0.624453	-2.1389	-0.449723	-0.76355
	6.67069	77.8022	7.64526	30.7409			-0.573653	-2.12735	-0.43788	-0.807569
	6.64574	77.729	7.60138	30.6698			-0.532528	-2.1152	-0.440691	-0.824108
	6.65056	77.6327	7.57942	30.6351			-0.527886	-2.11076	-0.448926	-0.826479
	6.66869	77.5056	7.57376	30.5954			-0.549777	-2.10513	-0.443446	-0.817265
	6.65187	77.4022	7.55281	30.5142			-0.572414	-2.09161	-0.428817	-0.791092
	6.59667	77.3285	7.52625	30.4155			-0.573919	-2.07191	-0.422418	-0.762547
	6.55801	77.2408	7.50784	30.2915			-0.562947	-2.0536	-0.430899	-0.749843
	6.57105	77.1452	7.48534	30.1278			-0.5746	-2.04381	-0.451309	-0.752859
	6.60956	77.0629	7.46813	29.9865			-0.61015	-2.04635	-0.473779	-0.768139
	6.62293	76.9656	7.47051	29.914			-0.641044	-2.05372	-0.476672	-0.792615
	6.58122	76.8538	7.46132	29.8643			-0.646162	-2.05372	-0.454998	-0.808325
	6.5038	76.7753	7.42149	29.7996			-0.621992	-2.05083	-0.436017	-0.802548
	6.44606	76.7272	7.38995	29.7328			-0.578785	-2.06156	-0.436894	-0.78912
	6.45026	76.6671	7.38786	29.6447			-0.555359	-2.08765	-0.442736	-0.778339
	6.48825	76.6044	7.39151	29.5127			-0.566753	-2.11508	-0.439626	-0.757585
	6.49167	76.5581	7.39646	29.3838			-0.580954	-2.13138	-0.433788	-0.716347
	6.45364	76.4969	7.40188	29.3041			-0.565049	-2.13009	-0.431743	-0.663967
	6.43099	76.4097	7.37984	29.2474			-0.527001	-2.11248	-0.442253	-0.614777
	6.44802	76.3294	7.33504	29.199			-0.498204	-2.08929	-0.469493	-0.581449
	6.47756	76.2527	7.31184	29.1654			-0.503284	-2.06804	-0.494945	-0.581397
	6.48209	76.1614	7.30706	29.1183			-0.535334	-2.04638	-0.496002	-0.617007
	6.43953	76.0831	7.27434	29.0241			-0.562516	-2.02182	-0.47985	-0.668821
	6.37672	76.0385	7.21516	28.9158			-0.56229	-2.00302	-0.469499	-0.726449
	6.3602	75.9884	7.16293	28.8253			-0.544581	-2.00352	-0.469452	-0.785195
	6.39837	75.9214	7.12299	28.7318			-0.532766	-2.02087	-0.471804	-0.825446
	6.42697	75.868	7.09931	28.6393			-0.527506	-2.04086	-0.46689	-0.828389
	6.40003	75.8201	7.10261	28.5798			-0.509132	-2.05161	-0.452774	-0.807592
	6.32564	75.7546	7.10782	28.5293			-0.479236	-2.05264	-0.439705	-0.779942
	6.242	75.6954	7.08925	28.4531			-0.458424	-2.04909	-0.450764	-0.74404
	6.19829	75.6588	7.07167	28.3725			-0.457941	-2.04938	-0.480894	-0.710361
	6.2133	75.6146	7.07699	28.3038			-0.480603	-2.05476	-0.50357	-0.690659
	6.24368	75.5603	7.08197	28.227			-0.51211	-2.05405	-0.500725	-0.674824
	6.23884	75.5217	7.07519	28.1463			-0.522566	-2.0368	-0.480988	-0.659451
	6.20457	75.4843	7.06994	28.0853			-0.509429	-2.01259	-0.472988	-0.656753
	6.18418	75.4273	7.0638	28.0179			-0.508387	-1.99649	-0.494611	-0.658908
	6.19602	75.3728	7.05508	27.9144			-0.532965	-1.99569	-0.527403	-0.647485
	6.22325	75.321	7.06122	27.8016			-0.563465	-2.00773	-0.536654	-0.638229
	6.23683	75.2323	7.07025	27.7114			-0.570443	-2.02273	-0.512577	-0.65385
	6.21872	75.1131	7.04524	27.6296			-0.545811	-2.02676	-0.479769	-0.680603
	6.1876	75.0077	6.99416	27.5594			-0.511412	-2.01517	-0.467074	-0.698541
	6.1876	74.9153	6.95943	27.5147			-0.498811	-1.99913	-0.483882	-0.712058
	6.21074	74.8253	6.94844	27.458			-0.507156	-1.98883	-0.510702	-0.721309
	6.20177	74.766	6.93684	27.3681			-0.512217	-1.98034	-0.516641	-0.719442
	6.14616	74.7461	6.9158	27.2941			-0.496478	-1.96802	-0.494145	-0.714554
	6.08728	74.7255	6.88482	27.2591			-0.47499	-1.95278	-0.469889	-0.699097
	6.05975	74.6937	6.84116	27.2191			-0.477657	-1.93845	-0.471139	-0.648149
	6.07326	74.6584	6.80218	27.1674			-0.501937	-1.92931	-0.494051	-0.575937
	6.10941	74.5936	6.78763	27.1191			-0.510572	-1.92596	-0.512706	-0.534123
	6.11986	74.494	6.78673	27.045			-0.490262	-1.92353	-0.508584	-0.535787
	6.07953	74.4008	6.78073	26.9362			-0.463779	-1.92164	-0.486597	-0.560104
	6.02681	74.3186	6.77455	26.8359			-0.456203	-1.92841	-0.465318	-0.602138
	6.01211	74.213	6.77784	26.7479			-0.473047	-1.9431	-0.4533	-0.649994
	6.03066	74.0999	6.78631	26.6415			-0.494733	-1.95408	-0.446581	-0.674619
	6.03066	74.0169	6.80593	26.5408			-0.487294	-1.95318	-0.443805	-0.674686
	5.98641	73.9503	6.83966	26.4844			-0.447972	-1.94227	-0.447477	-0.671407
	5.93461	73.8894	6.85987	26.4466			-0.412151	-1.92353	-0.457283	-0.673476
	5.92105	73.8589	6.85048	26.4062			-0.410047	-1.90627	-0.471842	-0.679776
	5.94969	73.8449	6.84068	26.3892			-0.43457	-1.89564	-0.482729	-0.694497
	5.9853	73.8071	6.84058	26.3738			-0.449381	-1.88761	-0.478486	-0.708158
	5.98602	73.7586	6.81736	26.3094			-0.438569	-1.88074	-0.464174	-0.702028
	5.9465	73.7218	6.76772	26.2193			-0.414388	-1.88245	-0.458187	-0.683855
	5.91563	73.6634	6.72488	26.1441			-0.401424	-1.89623	-0.459988	-0.678012
	5.92616	73.5727	6.69488	26.0722			-0.415325	-1.9169	-0.458696	-0.683123
	5.94683	73.4954	6.67257	26.0144			-0.451881	-1.93985	-0.458599	-0.677635
	5.93259	73.4375	6.6686	26.0074			-0.474805	-1.95803	-0.459439	-0.657835
	5.88614	73.3642	6.66141	26.0136			-0.468866	-1.95925	-0.449404	-0.637816
	5.84042	73.2858	6.6168	25.978			-0.460944	-1.94448	-0.433804	-0.628838
	5.81917	73.2161	6.56635	25.9195			-0.476399	-1.92882	-0.430676	-0.639415
	5.82655	73.1285	6.55801	25.8522			-0.512641	-1.92138	-0.437301	-0.665123
	5.84283	73.03	6.57096	25.7417			-0.557632	-1.91812	-0.446822	-0.671962
	5.83544	72.9637	6.57079	25.5966			-0.588781	-1.91719	-0.465777	-0.637461
	5.80081	72.9085	6.56902	25.4696			-0.591862	-1.91929	-0.490073	-0.582739
	5.77706	72.8109	6.57308	25.37			-0.579373	-1.91881	-0.505438	-0.53778
	5.78563	72.6804	6.57338	25.2892			-0.564758	-1.91362	-0.514576	-0.513102
	5.79538	72.5507	6.58255	25.2493			-0.542062	-1.90931	-0.524417	-0.515701
	5.78168	72.4178	6.59425	25.243			-0.511889	-1.90845	-0.522934	-0.545022
	5.75086	72.299	6.5686	25.2124			-0.4829	-1.90749	-0.504402	-0.583728
	5.71771	72.2284	6.51162	25.1412			-0.463056	-1.90745	-0.480837	-0.619485
	5.70886	72.1809	6.47526	25.0674			-0.456567	-1.90782	-0.459668	-0.661792
	5.73706	72.1171	6.46863	24.9998			-0.461726	-1.90684	-0.445602	-0.712025
	5.75682	72.0527	6.46968	24.92			-0.467589	-1.90657	-0.442611	-0.749954
	5.71866	72.0001	6.48086	24.8401			-0.457421	-1.91255	-0.444982	-0.765673
	5.64414	71.9293	6.49457	24.7477			-0.435043	-1.92537	-0.438395	-0.764909
	5.58291	71.8497	6.47916	24.6109			-0.428778	-1.9387	-0.427796	-0.755675
	5.55555	71.8081	6.44399	24.4623			-0.458528	-1.94259	-0.429254	-0.75293
	5.55604	71.7951	6.42064	24.3665			-0.509831	-1.93328	-0.445833	-0.767727
	5.55204	71.7806	6.39608	24.3125			-0.557679	-1.91212	-0.471054	-0.782364
	5.50791	71.7776	6.34761	24.2665			-0.571708	-1.8866	-0.493247	-0.770565
	5.44565	71.7822	6.29363	24.2454			-0.545015	-1.8673	-0.503378	-0.746685
	5.42829	71.7563	6.25744	24.2551			-0.512028	-1.86265	-0.50565	-0.736817
	5.47453	71.7118	6.24557	24.259			-0.509615	-1.86736	-0.514643	-0.737552
	5.54173	71.6934	6.25994	24.2485			-0.52408	-1.87125	-0.529693	-0.745852
	5.58421	71.6879	6.27975	24.2408			-0.528396	-1.87637	-0.534425	-0.771715
	5.57819	71.6639	6.2653	24.2156			-0.517066	-1.889	-0.520496	-0.801827
	5.53026	71.6226	6.21583	24.1531			-0.504109	-1.90674	-0.492557	-0.810968
	5.48113	71.5573	6.17888	24.0785			-0.510405	-1.92245	-0.462013	-0.798912
	5.46786	71.4554	6.17633	24.0002			-0.542075	-1.92927	-0.443419	-0.769173
	5.46812	71.3621	6.1863	23.8984			-0.571937	-1.92567	-0.444093	-0.719881
	5.44923	71.3181	6.19384	23.7998			-0.571404	-1.91799	-0.452787	-0.677425
	5.42463	71.2892	6.19887	23.7481			-0.542568	-1.91389	-0.458168	-0.68231
	5.40952	71.244	6.19349	23.7222			-0.513402	-1.91224	-0.462044	-0.729225
	5.39617	71.2053	6.17779	23.6937			-0.499331	-1.90752	-0.469874	-0.783773
	5.38936	71.1771	6.1681	23.6714			-0.486186	-1.9039	-0.483195	-0.831502
	5.38994	71.1313	6.15964	23.6237			-0.46283	-1.9084	-0.49591	-0.860591
	5.37918	71.0739	6.12897	23.5028			-0.455011	-1.92077	-0.497783	-0.852425
	5.36547	71.0174	6.08843	23.343			-0.493636	-1.93197	-0.482341	-0.818705
	5.37868	70.9336	6.07018	23.2062			-0.57639	-1.93623	-0.457753	-0.790061
	5.41037	70.8289	6.07082	23.096			-0.669368	-1.93159	-0.440372	-0.771031
	5.42559	70.7539	6.06519	23.0205			-0.721474	-1.92543	-0.438432	-0.754802
	5.41114	70.7108	6.04674	23.0092			-0.703629	-1.92758	-0.446531	-0.755448
	5.375	70.6627	6.01624	23.0267			-0.63455	-1.93922	-0.4538	-0.769387
	5.33279	70.6143	5.97768	23.0114			-0.559201	-1.95108	-0.459427	-0.773906
	5.30302	70.5787	5.95922	22.9713			-0.499006	-1.95739	-0.473459	-0.774503
	5.29546	70.5337	5.97794	22.9266			-0.456766	-1.95723	-0.496633	-0.790566
	5.29665	70.4821	5.99552	22.8514			-0.432261	-1.94876	-0.517108	-0.816566
	5.28872	70.4493	5.97828	22.7494			-0.428743	-1.93715	-0.52777	-0.837649
	5.27487	70.4078	5.9497	22.6634			-0.441697	-1.93029	-0.526954	-0.851138
	5.27121	70.3219	5.93269	22.5836			-0.457915	-1.92482	-0.520462	-0.848865
	5.26936	70.2312	5.91492	22.4864			-0.461463	-1.9204	-0.523406	-0.816311
	5.24645	70.18	5.89382	22.4039			-0.447871	-1.92475	-0.541734	-0.763754
	5.20454	70.1486	5.87436	22.3451			-0.428017	-1.94043	-0.552856	-0.721173
	5.16897	70.1179	5.84061	22.2616			-0.429635	-1.95872	-0.538254	-0.699939
	5.15668	70.0972	5.80163	22.1582			-0.460673	-1.97522	-0.51541	-0.697412
	5.16741	70.066	5.79913	22.0844			-0.495077	-1.98725	-0.508218	-0.713486
	5.1867	70.0071	5.82413	22.0301			-0.509717	-1.98626	-0.518826	-0.738837
	5.1884	69.9549	5.82403	21.9669			-0.508431	-1.97423	-0.53775	-0.755589
	5.15157	69.9191	5.79319	21.9104			-0.496611	-1.9634	-0.549495	-0.766188
	5.09004	69.846	5.75193	21.8579			-0.483639	-1.95772	-0.536262	-0.78362
	5.03793	69.7215	5.69928	21.7816			-0.478488	-1.95222	-0.506239	-0.797155
	5.01134	69.5899	5.65284	21.701			-0.474597	-1.95285	-0.491736	-0.788057
	5.00236	69.4699	5.64527	21.6543			-0.460686	-1.96794	-0.497523	-0.759482
	4.99778	69.3665	5.65212	21.6219			-0.444023	-1.99329	-0.501864	-0.72112
	4.98603	69.3135	5.63403	21.5773			-0.440686	-2.01807	-0.497299	-0.686364
	4.96449	69.3077	5.61632	21.5346			-0.460333	-2.03676	-0.495066	-0.678855
	4.95093	69.2938	5.62861	21.4922			-0.498326	-2.04151	-0.497833	-0.702836
	4.952	69.2593	5.64407	21.4273			-0.518691	-2.02558	-0.502629	-0.729642
	4.94733	69.2366	5.6487	21.3586			-0.490365	-1.99725	-0.501714	-0.735988
	4.93356	69.2103	5.6565	21.329			-0.425851	-1.97201	-0.479815	-0.729162
	4.93045	69.1511	5.65531	21.327			-0.379369	-1.95292	-0.440666	-0.722007
	4.93674	69.0769	5.63568	21.3263			-0.388863	-1.93581	-0.409653	-0.715987
	4.93795	69.0002	5.62169	21.3302			-0.440408	-1.91711	-0.404049	-0.717946
	4.93406	68.9055	5.61162	21.3234			-0.486807	-1.89963	-0.415133	-0.726178
	4.92148	68.8158	5.57639	21.2719			-0.501538	-1.88963	-0.430575	-0.723345
	4.8942	68.7693	5.53228	21.1883			-0.487078	-1.89289	-0.447595	-0.709064
	4.86986	68.7403	5.5108	21.1062			-0.465431	-1.90447	-0.466614	-0.699802
	4.8608	68.6954	5.49509	21.0141			-0.459867	-1.91159	-0.486019	-0.692981
	4.85156	68.6496	5.46645	20.9063			-0.465856	-1.9098	-0.49739	-0.673343
	4.82861	68.6019	5.44309	20.8201			-0.459913	-1.90767	-0.490472	-0.653467
	4.80333	68.5202	5.42903	20.7701			-0.443529	-1.91065	-0.468251	-0.649082
	4.78537	68.4178	5.41361	20.7344			-0.429845	-1.91014	-0.44769	-0.653627
	4.78372	68.3291	5.4153	20.7114			-0.418931	-1.89722	-0.439574	-0.661994
	4.80874	68.2453	5.44741	20.7024			-0.40831	-1.8782	-0.44069	-0.671401
	4.84255	68.165	5.47762	20.6672			-0.403718	-1.86454	-0.441149	-0.660346
	4.84722	68.1219	5.48065	20.585			-0.403491	-1.85974	-0.430555	-0.625923
	4.82132	68.1085	5.46938	20.4941			-0.406686	-1.86259	-0.40891	-0.602694
	4.79478	68.0841	5.45199	20.4147			-0.415736	-1.86563	-0.388101	-0.603189
	4.78131	68.0559	5.42338	20.3328			-0.426523	-1.86049	-0.381032	-0.599837
	4.78391	68.0422	5.39597	20.2601			-0.427791	-1.84712	-0.387154	-0.58237
	4.80899	68.0053	5.37523	20.207			-0.41474	-1.83434	-0.399012	-0.568683
	4.83261	67.9255	5.34628	20.1346			-0.400648	-1.8265	-0.40738	-0.564885
	4.82526	67.8301	5.31477	20.0371			-0.402206	-1.82334	-0.402374	-0.566438
	4.80835	67.7254	5.31023	19.9626			-0.420252	-1.82185	-0.385379	-0.579402
	4.81657	67.6074	5.33365	19.9108			-0.439424	-1.81732	-0.37136	-0.590628
	4.83623	67.5211	5.35383	19.8513			-0.450436	-1.80583	-0.372091	-0.57741
	4.82864	67.489	5.3552	19.8066			-0.447955	-1.79151	-0.381637	-0.551735
	4.7786	67.459	5.33985	19.7899			-0.444135	-1.78024	-0.38095	-0.537638
	4.69494	67.4078	5.30611	19.7606			-0.457347	-1.773	-0.362962	-0.532052
	4.61195	67.3667	5.26664	19.7159			-0.47931	-1.7692	-0.34263	-0.530256
	4.57454	67.3306	5.24536	19.6959			-0.480966	-1.76739	-0.333412	-0.545321
	4.58855	67.275	5.23363	19.6844			-0.459137	-1.76035	-0.332276	-0.571264
	4.61198	67.218	5.20676	19.6468			-0.433968	-1.74706	-0.333213	-0.589462
	4.61505	67.1598	5.18327	19.6042			-0.42099	-1.73683	-0.334816	-0.611156
	4.60649	67.0624	5.19457	19.569			-0.419657	-1.73967	-0.332417	-0.65444
	4.59848	66.9406	5.221	19.5157			-0.422103	-1.75193	-0.32535	-0.704186
	4.59016	66.8499	5.22684	19.456			-0.41684	-1.76837	-0.322589	-0.734038
	4.58716	66.7886	5.20786	19.4188			-0.410175	-1.78489	-0.325284	-0.732743
	4.59183	66.7306	5.16484	19.3706			-0.424219	-1.792	-0.331976	-0.701875
	4.58984	66.6875	5.10679	19.2815			-0.473403	-1.78906	-0.351613	-0.650988
	4.57443	66.6546	5.07463	19.1931			-0.531143	-1.78372	-0.380339	-0.6035
	4.56413	66.5933	5.08207	19.1251			-0.551713	-1.77872	-0.392859	-0.577604
	4.56745	66.5118	5.08688	19.0472			-0.51772	-1.77165	-0.377335	-0.568203
	4.56749	66.4425	5.06753	18.9712			-0.452247	-1.76686	-0.350394	-0.568929
	4.54888	66.368	5.05116	18.9326			-0.39	-1.76535	-0.325178	-0.585062
	4.51344	66.269	5.04416	18.9085			-0.359969	-1.76004	-0.307924	-0.605948
	4.46778	66.1867	5.03692	18.8756			-0.364599	-1.7509	-0.308229	-0.605234
	4.42164	66.1426	5.04814	18.8562			-0.373512	-1.7462	-0.322618	-0.575269
	4.39567	66.1061	5.07827	18.8462			-0.373567	-1.74495	-0.328582	-0.529972
	4.39429	66.0737	5.08464	18.8131			-0.375069	-1.73975	-0.320046	-0.481127
	4.39397	66.0598	5.05994	18.7611			-0.388269	-1.72942	-0.311387	-0.442428
	4.3849	66.0331	5.03819	18.7063			-0.410591	-1.7214	-0.305826	-0.429128
	4.38096	65.9751	5.01764	18.6308			-0.434898	-1.7201	-0.300077	-0.433046
	4.38534	65.9148	4.97892	18.543			-0.444547	-1.72668	-0.296204	-0.436594
	4.38591	65.8542	4.94254	18.4886			-0.435347	-1.7382	-0.293429	-0.447959
	4.38007	65.7637	4.92816	18.4698			-0.423436	-1.74651	-0.283838	-0.481435
	4.37021	65.6622	4.92606	18.4462			-0.423888	-1.7398	-0.267434	-0.529636
	4.36297	65.591	4.94347	18.4106			-0.430315	-1.72129	-0.246074	-0.578385
	4.37462	65.5351	4.97935	18.3807			-0.429368	-1.70532	-0.215303	-0.617164
	4.39497	65.4729	4.98074	18.3413			-0.417328	-1.70074	-0.18318	-0.632271
	4.38541	65.4219	4.91788	18.2797			-0.405462	-1.70899	-0.167667	-0.610893
	4.33569	65.3852	4.83957	18.2179			-0.401564	-1.7271	-0.175561	-0.564417
	4.28216	65.3424	4.79621	18.159			-0.404613	-1.74446	-0.195745	-0.507943
	4.25548	65.3005	4.79575	18.0876			-0.401901	-1.75117	-0.207118	-0.439249
	4.25543	65.2686	4.83347	18.0304			-0.384118	-1.74946	-0.19739	-0.367669
	4.26216	65.2166	4.87991	18.0211			-0.362988	-1.74375	-0.179174	-0.324264
	4.24848	65.14	4.88115	18.0318			-0.368842	-1.72904	-0.181744	-0.322756
	4.20608	65.0846	4.8377	18.0264			-0.402409	-1.70539	-0.21398	-0.355435
	4.17285	65.0601	4.81014	18.0074			-0.434199	-1.6867	-0.255645	-0.412978
	4.18944	65.0301	4.82065	17.9627			-0.445376	-1.68237	-0.27995	-0.47163
	4.2452	64.9829	4.83437	17.8735			-0.438846	-1.68949	-0.277117	-0.504445
	4.30045	64.9216	4.82914	17.7729			-0.429739	-1.70158	-0.255819	-0.527223
	4.33286	64.826	4.80318	17.6982			-0.432672	-1.71506	-0.234192	-0.565013
	4.32825	64.7152	4.75641	17.6328			-0.443961	-1.72499	-0.220196	-0.59023
	4.28675	64.6427	4.71237	17.5721			-0.436731	-1.73219	-0.205679	-0.56172
	4.24084	64.611	4.70434	17.544			-0.399138	-1.74378	-0.18791	-0.491145
	4.22102	64.5821	4.71957	17.5382			-0.35183	-1.75685	-0.178739	-0.414455
	4.22416	64.5601	4.72446	17.5251			-0.331252	-1.75944	-0.194939	-0.361562
	4.23345	64.5542	4.72309	17.5151			-0.347905	-1.75066	-0.238021	-0.355486
	4.24853	64.5331	4.72838	17.5044			-0.378815	-1.73688	-0.287444	-0.391699
	4.25224	64.4915	4.72665	17.4456			-0.39352	-1.7212	-0.312482	-0.43198
	4.23241	64.4532	4.71334	17.3426			-0.379408	-1.70375	-0.299435	-0.452629
	4.19857	64.4009	4.70152	17.2582			-0.343049	-1.68691	-0.26703	-0.471476
	4.1647	64.3147	4.68725	17.2075			-0.309423	-1.66998	-0.245636	-0.495394
	4.13451	64.2302	4.6604	17.1747			-0.299652	-1.65757	-0.248337	-0.507014
	4.12046	64.1685	4.63933	17.1743			-0.307827	-1.65946	-0.262567	-0.506766
	4.13469	64.097	4.63884	17.1931			-0.317629	-1.68153	-0.26857	-0.50849
	4.1588	64.0121	4.63707	17.1778			-0.335492	-1.71539	-0.270895	-0.513875
	4.16006	63.9442	4.62032	17.1293			-0.364591	-1.74846	-0.29086	-0.527778
	4.14255	63.8778	4.60544	17.0848			-0.394179	-1.769	-0.323996	-0.5583
	4.13327	63.7914	4.59583	17.0349			-0.407473	-1.76993	-0.336897	-0.587473
	4.13183	63.713	4.58176	16.9769			-0.399881	-1.75681	-0.313944	-0.591608
	4.12235	63.6561	4.5756	16.9517			-0.380621	-1.73781	-0.271781	-0.587725
	4.10666	63.5921	4.578	16.95			-0.371252	-1.71628	-0.240371	-0.603559
	4.08514	63.5316	4.55956	16.9198			-0.383873	-1.69449	-0.240914	-0.63606
	4.05114	63.5053	4.52481	16.8669			-0.406496	-1.68303	-0.267687	-0.669926
	4.02235	63.4833	4.51768	16.8222			-0.41456	-1.68908	-0.283524	-0.695479
	4.02274	63.4293	4.54066	16.7707			-0.39826	-1.70313	-0.266704	-0.699812
	4.04018	63.376	4.56098	16.7161			-0.375286	-1.71593	-0.24451	-0.677595
	4.03969	63.3431	4.56586	16.7018			-0.363956	-1.72729	-0.250048	-0.645888
	4.01461	63.3035	4.54378	16.7142			-0.371166	-1.73245	-0.276356	-0.621746
	3.98509	63.2598	4.48046	16.6977			-0.38761	-1.72496	-0.296821	-0.600157
	3.9617	63.2284	4.41065	16.65			-0.389876	-1.70538	-0.296226	-0.577711
	3.94449	63.1784	4.38068	16.6008			-0.36204	-1.68001	-0.272019	-0.569609
	3.9302	63.1015	4.36977	16.548			-0.327614	-1.65411	-0.245469	-0.585017
	3.90817	63.0427	4.339	16.4987			-0.319139	-1.63773	-0.250537	-0.619196
	3.88154	63.0096	4.30989	16.4813			-0.33681	-1.63549	-0.284549	-0.669179
	3.8842	62.9613	4.31199	16.4853			-0.356427	-1.64047	-0.298944	-0.725609
	3.92446	62.8944	4.32552	16.4786			-0.357772	-1.64288	-0.267137	-0.766719
	3.96302	62.8264	4.32899	16.4672			-0.333101	-1.64546	-0.215822	-0.782721
	3.97827	62.7473	4.31626	16.4608			-0.308887	-1.65247	-0.183221	-0.781114
	3.9822	62.676	4.27634	16.4271			-0.321566	-1.66137	-0.188908	-0.763054
	3.98075	62.6574	4.22881	16.3508			-0.376821	-1.66662	-0.221071	-0.72737
	3.97825	62.6726	4.22256	16.2689			-0.436567	-1.66618	-0.242938	-0.699221
	3.98206	62.6633	4.25296	16.2			-0.466255	-1.66111	-0.2342	-0.701929
	3.97529	62.6285	4.26651	16.137			-0.459351	-1.65391	-0.217657	-0.732351
	3.94152	62.6007	4.25131	16.0928			-0.435793	-1.6504	-0.224545	-0.777578
	3.90132	62.5759	4.22821	16.073			-0.419608	-1.65116	-0.249489	-0.822112
	3.87863	62.5517	4.19862	16.0376			-0.421162	-1.64483	-0.266542	-0.843875
	3.86466	62.5409	4.17911	15.9645			-0.425931	-1.62546	-0.258743	-0.840396
	3.84542	62.5188	4.19612	15.8819			-0.416685	-1.60118	-0.239219	-0.843449
	3.81412	62.4643	4.22483	15.8012			-0.402314	-1.58302	-0.239996	-0.875684
	3.76793	62.4146	4.2208	15.7165			-0.398453	-1.57763	-0.273015	-0.920234
	3.72701	62.4009	4.19628	15.6487			-0.402691	-1.58632	-0.311348	-0.955448
	3.7401	62.3868	4.18507	15.6117			-0.403069	-1.60662	-0.317834	-0.971244
	3.77574	62.3435	4.19011	15.5803			-0.39732	-1.62872	-0.286288	-0.960498
	3.80114	62.2832	4.20431	15.5489			-0.381301	-1.64449	-0.244783	-0.936118
	3.79689	62.2144	4.21709	15.5405			-0.358066	-1.65597	-0.229825	-0.929763
	3.78313	62.1423	4.20125	15.5347			-0.343781	-1.66845	-0.250177	-0.940415
	3.77616	62.0952	4.15683	15.4941			-0.343672	-1.678	-0.276102	-0.93618
	3.78854	62.0653	4.13202	15.4366			-0.344387	-1.67651	-0.273494	-0.913303
	3.81478	61.9989	4.14714	15.3862			-0.33978	-1.66011	-0.247963	-0.89039
	3.81109	61.8959	4.16138	15.3233			-0.332716	-1.6348	-0.24016	-0.865494
	3.76278	61.8101	4.1441	15.2489			-0.328431	-1.60923	-0.270196	-0.836246
	3.71828	61.754	4.11505	15.1972			-0.330624	-1.59602	-0.314296	-0.821209
	3.71079	61.7049	4.10359	15.1615			-0.340726	-1.59874	-0.331887	-0.815001
	3.72278	61.662	4.11754	15.1257			-0.353381	-1.61177	-0.306838	-0.796294
	3.73505	61.6183	4.14837	15.1127			-0.362506	-1.6319	-0.263769	-0.771623
	3.73187	61.5551	4.16637	15.1152			-0.367944	-1.65925	-0.239411	-0.753334
	3.70444	61.5029	4.14186	15.082			-0.381935	-1.68759	-0.241053	-0.731281
	3.6721	61.4939	4.09539	15.0143			-0.406378	-1.71233	-0.240268	-0.709563
	3.66991	61.4836	4.07566	14.9514			-0.432678	-1.72955	-0.212758	-0.715106
	3.691	61.4258	4.08618	14.8835			-0.450885	-1.73108	-0.16788	-0.746417
	3.69798	61.3475	4.09143	14.8025			-0.456567	-1.71592	-0.141357	-0.77105
	3.67421	61.2852	4.08013	14.7449			-0.442708	-1.69275	-0.155799	-0.773089
	3.64295	61.2363	4.06217	14.7075			-0.416379	-1.66876	-0.193853	-0.746038
	3.62931	61.2	4.04037	14.6534			-0.395946	-1.64697	-0.220847	-0.687148
	3.62642	61.1637	4.02698	14.6007			-0.385261	-1.63461	-0.224553	-0.623987
	3.61397	61.0857	4.0326	14.5817			-0.375362	-1.63765	-0.215122	-0.595916
	3.5886	60.9675	4.02553	14.5669			-0.367405	-1.65341	-0.211626	-0.60159
	3.57012	60.8751	3.98152	14.5328			-0.377919	-1.67935	-0.227785	-0.609707
	3.58566	60.8284	3.94476	14.5049			-0.414804	-1.7104	-0.249051	-0.603567
	3.63441	60.785	3.96296	14.4818			-0.465085	-1.73515	-0.24637	-0.583403
	3.67574	60.7322	4.01822	14.4455			-0.504615	-1.75008	-0.222309	-0.550986
	3.66997	60.6861	4.07317	14.42			-0.520653	-1.76276	-0.211924	-0.522001
	3.62809	60.6303	4.10701	14.4165			-0.520501	-1.78007	-0.229829	-0.517866
	3.59771	60.5611	4.09787	14.3925			-0.529119	-1.79109	-0.260168	-0.530875
	3.61105	60.5044	4.05666	14.3405			-0.550951	-1.78613	-0.284707	-0.53798
	3.65173	60.4412	4.03642	14.3008			-0.553881	-1.76567	-0.289357	-0.535259
	3.67979	60.3309	4.04185	14.27			-0.516657	-1.73564	-0.270162	-0.528958
	3.66453	60.2084	4.0189	14.2192			-0.471172	-1.70644	-0.248537	-0.514686
	3.60304	60.1316	3.96258	14.1637			-0.453306	-1.69421	-0.247351	-0.492159
	3.53718	60.0914	3.91697	14.1219			-0.465102	-1.7002	-0.25376	-0.473028
	3.51747	60.0608	3.8929	14.0787			-0.478139	-1.71159	-0.247652	-0.463456
	3.53368	60.0403	3.88504	14.0365			-0.467243	-1.72415	-0.238271	-0.463321
	3.53381	60.0178	3.9035	14.018			-0.426559	-1.74437	-0.242797	-0.478054
	3.50683	59.9851	3.92642	14.0072			-0.386246	-1.77174	-0.261053	-0.498446
	3.48239	59.9731	3.91742	13.9766			-0.375891	-1.79782	-0.277929	-0.503156
	3.48353	59.9878	3.90172	13.9375			-0.396083	-1.81687	-0.271184	-0.492382
	3.51183	59.9688	3.91594	13.9071			-0.425336	-1.82335	-0.223693	-0.484965
	3.53349	59.8882	3.93187	13.8696			-0.438565	-1.81387	-0.157058	-0.481876
	3.50159	59.7889	3.91841	13.817			-0.422889	-1.79633	-0.118645	-0.471974
	3.43409	59.6934	3.88487	13.765			-0.390431	-1.78001	-0.130321	-0.466862
	3.39759	59.5939	3.83603	13.7064			-0.369828	-1.7669	-0.171679	-0.485078
	3.41533	59.5019	3.78068	13.6339			-0.368352	-1.75595	-0.206245	-0.521243
	3.44679	59.4214	3.75637	13.5863			-0.369297	-1.75121	-0.212962	-0.565125
	3.4503	59.3278	3.76249	13.593			-0.363507	-1.75734	-0.199792	-0.603478
	3.41738	59.2448	3.74717	13.6195			-0.37004	-1.76575	-0.193704	-0.615821
	3.38082	59.2199	3.70574	13.628			-0.402818	-1.76677	-0.208572	-0.606026
	3.38812	59.228	3.68503	13.6178			-0.449713	-1.76085	-0.229625	-0.604847
	3.44232	59.2047	3.69435	13.5807			-0.484928	-1.75511	-0.234711	-0.616989
	3.48463	59.1399	3.70785	13.516			-0.489592	-1.75711	-0.2221	-0.620743
	3.4718	59.051	3.71495	13.4628			-0.464849	-1.77306	-0.212119	-0.620001
	3.43249	58.9476	3.705	13.4365			-0.4381	-1.79719	-0.224775	-0.630757
	3.41472	58.859	3.66968	13.4057			-0.435794	-1.81298	-0.257994	-0.643386
	3.42871	58.8065	3.63708	13.3639			-0.453094	-1.80717	-0.284631	-0.647758
	3.45371	58.7567	3.63331	13.3369			-0.467672	-1.78939	-0.284007	-0.653094
	3.45246	58.6898	3.63381	13.3083			-0.472088	-1.77862	-0.26826	-0.655719
	3.39935	58.6464	3.60981	13.2546			-0.46959	-1.78591	-0.265332	-0.646861
	3.33735	58.6493	3.57802	13.2			-0.466551	-1.80507	-0.282219	-0.641432
[truncated: 5,501 more rows]

## Sheet: panel_F
day 1	0.040312	-0.150815	-0.278938	-0.908976			0.108394	-0.499894	0.108004	-1.65232
day 2	0.297379	0.149581	0.122483	0.443636			0.120912	-0.0316849	-0.0636014	-0.163935
day 3	0.685501	0.0457189	-0.0732993	3.52633			0.182446	-0.13746	0.254294	1.18424
day 4	1.0143	0.623861	0.243099	5.5671			0.589252	0.0666532	-0.282331	2.50119
day 5	0.779332	0.111059	0.132943	5.58805			0.0918709	-0.162023	-0.0335895	0.394718
day 6	1.43266	1.09351	0.695027	8.8915			0.307224	-0.235744	-0.46546	2.03042
day 7	0.965495	1.93008	1.25482	7.85839			0.19322	0.471862	0.281657	2.45015
day 8	1.13209	2.03847	0.816063	9.66409			0.180131	-0.0211621	0.283694	0.369153
day 9	2.45981	2.1431	2.34983	10.1333			0.507474	-0.467689	0.20306	2.7828
day 10	2.81441	3.37685	2.97587	9.23985			0.318722	0.258733	-0.161443	1.62055
