# Supplementary material for: Stimulation of VTA dopamine inputs to LH upregulates orexin neuronal activity in a DRD2-dependent manner
Source: eLife. 2024 Apr 3;12:RP90158. doi: 10.7554/eLife.90158 (PMC10990487; doi:10.7554/eLife.90158)
Supplement: Figure 1—source data 2. [file elife-90158-fig1-data2.xlsx]

## Sheet: day1
	-0.0368966	-0.00651883	0.0489413	0.0413095
	-0.0666107	0.00628797	0.0266486	0.00417715
	-0.10239	0.0116313	0.00101994	-0.00505069
	-0.0960619	0.0157509	-0.00664973	0.00475101
	-0.0286827	0.0258286	-0.00655563	0.0200195
	0.0546618	0.0363597	-0.0116996	0.0516513
	0.0886161	0.0391868	-0.0139161	0.0871272
	0.0621799	0.0356405	-0.0132828	0.0982492
	0.0183779	0.034162	-0.0237155	0.0971404
	-0.00332075	0.0410572	-0.0396738	0.10305
	-0.00495345	0.0526786	-0.0533717	0.0915411
	-0.017176	0.0567576	-0.0702428	0.061467
	-0.0557644	0.0458146	-0.07925	0.0547924
	-0.0907757	0.029667	-0.0632467	0.0713019
	-0.072765	0.0235671	-0.0353931	0.0742117
	-0.0049251	0.0286829	-0.0209715	0.0619006
	0.045769	0.0307679	-0.0043001	0.0425933
	0.0281755	0.0197703	0.00252198	0.00567003
	-0.0408453	0.0015494	-0.00477654	-0.0228055
	-0.0987678	-0.0102944	-0.0141495	-0.00787688
	-0.097325	-0.0095855	-0.0105457	0.0224355
	-0.0503507	-0.00252701	-0.00358378	0.0279617
	-0.0248675	-0.00530047	-0.00418903	0.0156577
	-0.0471682	-0.0243942	-0.00910881	-0.00540154
	-0.0681321	-0.0469522	-0.0219515	-0.0433351
	-0.0395052	-0.0608576	-0.0465478	-0.0740487
	0.0223654	-0.0633852	-0.0639776	-0.0648508
	0.0630828	-0.0567947	-0.0563216	-0.0291344
	0.0454441	-0.0462605	-0.0359569	0.00873304
	-0.0179395	-0.0393656	-0.0232203	0.0507678
	-0.071742	-0.0409502	-0.0238996	0.0972388
	-0.0769751	-0.0493415	-0.0405982	0.134357
	-0.0556064	-0.0596745	-0.0723024	0.169847
	-0.0589142	-0.064387	-0.0986214	0.205162
	-0.0953093	-0.0562483	-0.100596	0.202866
	-0.116766	-0.0363191	-0.0870906	0.146347
	-0.0827503	-0.00997873	-0.077312	0.0715833
	-0.0122622	0.0138787	-0.0757315	0.0140733
	0.0307986	0.0247603	-0.0760946	-0.0167525
	0.00176112	0.016028	-0.0789113	-0.00474457
	-0.0712395	-0.00635109	-0.0822206	0.0553797
	-0.109544	-0.0286672	-0.0820536	0.123098
	-0.0785992	-0.0417465	-0.0893595	0.15085
	-0.02975	-0.0477368	-0.108164	0.132893
	-0.0279466	-0.0512416	-0.116793	0.0821221
	-0.0756576	-0.0549995	-0.0976756	0.0131408
	-0.113497	-0.0598386	-0.0702	-0.041604
	-0.0923877	-0.0611031	-0.0576039	-0.055698
	-0.0263448	-0.0551727	-0.0615406	-0.0428226
	0.0218561	-0.0478043	-0.0787056	-0.0193248
	0.00725614	-0.0489478	-0.0956164	0.0251964
	-0.0481319	-0.0588836	-0.0891088	0.0852597
	-0.0666799	-0.0691177	-0.0613303	0.128719
	-0.00208098	-0.0748943	-0.0414419	0.15146
	0.0933324	-0.0768169	-0.0332372	0.165648
	0.127125	-0.0758951	-0.0193332	0.15315
	0.0731203	-0.0725307	-0.00313008	0.1201
	-0.0153404	-0.0645627	0.00275313	0.114643
	-0.0671751	-0.0493912	0.00239866	0.146439
	-0.0598752	-0.0296212	-0.000604032	0.177828
	-0.0424029	-0.015729	-0.0133774	0.198439
	-0.0713122	-0.0168445	-0.0269476	0.221451
	-0.127086	-0.0289108	-0.0341861	0.231835
	-0.138121	-0.0390079	-0.048936	0.231196
	-0.0745503	-0.0411957	-0.0722727	0.246099
	0.0117077	-0.0388172	-0.0840454	0.26328
	0.0416756	-0.0426842	-0.0768955	0.25789
	-0.00661873	-0.0560756	-0.0570575	0.256943
	-0.0703353	-0.0693628	-0.021858	0.286575
	-0.0691384	-0.0695398	0.0181685	0.31702
	-0.00456186	-0.0518896	0.0377028	0.334103
	0.0489329	-0.0259229	0.0397828	0.352518
	0.039832	-0.0114875	0.0455427	0.350315
	-0.000765998	-0.0184009	0.0522258	0.310014
	-0.013698	-0.0351184	0.0512247	0.271585
	0.0202464	-0.0465149	0.0498888	0.260698
	0.0648457	-0.0511512	0.0482218	0.252515
	0.0637866	-0.0510789	0.0384437	0.238618
	0.00163617	-0.0467657	0.0295518	0.222811
	-0.0650831	-0.0428174	0.0289839	0.181533
	-0.0725454	-0.0412528	0.0209376	0.117302
	-0.0267311	-0.0410301	0.000952854	0.0754472
	0.0211958	-0.0474178	-0.00920673	0.0699147
	0.0380188	-0.0620623	-0.00300259	0.0689587
	0.0277644	-0.0732303	0.00654798	0.0610258
	0.0236128	-0.0660649	0.0169137	0.0473837
	0.0495956	-0.0407907	0.0317577	0.00653695
	0.080853	-0.0129691	0.0503984	-0.0605361
	0.0686182	0.00389246	0.0819158	-0.118292
	0.0125885	0.00234125	0.13333	-0.149494
	-0.0294697	-0.0135294	0.182176	-0.161009
	-0.00624306	-0.0274771	0.19773	-0.142595
	0.0688733	-0.0249808	0.184365	-0.0895582
	0.126893	-0.0113248	0.169207	-0.0332295
	0.117527	-0.00110772	0.161176	0.00655988
	0.0620359	0.00230299	0.152941	0.042804
	0.033203	0.00694629	0.135608	0.0766553
	0.0714688	0.0170298	0.106178	0.0944123
	0.133075	0.0248087	0.0688492	0.101196
	0.137587	0.0196854	0.0439898	0.107268
	0.0710449	0.00617375	0.0481995	0.0959071
	0.00356511	0.000593523	0.061896	0.0575735
	0.00471363	0.00940552	0.0605646	0.0126808
	0.0680319	0.0288696	0.0477573	-0.0270747
	0.123432	0.0531602	0.0376986	-0.0678339
	0.1154	0.0701596	0.0346178	-0.0955646
	0.058753	0.0713875	0.0465376	-0.088868
	0.0186268	0.0605715	0.0749276	-0.0605562
	0.0368352	0.0466782	0.0954658	-0.0248401
	0.0816342	0.0387848	0.0936815	0.0237405
	0.0852397	0.0440299	0.0869793	0.0670335
	0.0296093	0.0596002	0.087872	0.0751087
	-0.0324053	0.0715603	0.0831464	0.0682967
	-0.0471137	0.0745913	0.0662995	0.0816148
	-0.0144447	0.0734762	0.0416556	0.100858
	0.0187966	0.0680047	0.0115269	0.109623
	0.0109337	0.0553237	-0.0122124	0.116964
	-0.0231333	0.0419422	-0.0181321	0.103233
	-0.0272956	0.0333199	-0.0225417	0.0441668
	0.0161878	0.026801	-0.0474257	-0.0350715
	0.0560275	0.0202383	-0.0734771	-0.105247
	0.0367723	0.0207311	-0.0723845	-0.176619
	-0.0405042	0.0349959	-0.0531205	-0.242642
	-0.115491	0.0610996	-0.0317226	-0.274234
	-0.123457	0.0883478	-0.011217	-0.281607
	-0.0575604	0.0986309	0.000773126	-0.286882
	0.0161762	0.0836995	0.000352119	-0.276865
	0.0316988	0.0568199	-0.00255043	-0.254577
	-0.0048873	0.034629	-0.00900848	-0.2569
	-0.0312865	0.0241836	-0.0294673	-0.279019
	-0.00378348	0.0226603	-0.0511092	-0.28386
	0.0595779	0.0221189	-0.0563639	-0.278275
	0.0986459	0.0206448	-0.051761	-0.281254
	0.0709711	0.0307467	-0.0441781	-0.280879
	0.00604268	0.0613582	-0.0273388	-0.277742
	-0.0223356	0.0992324	-0.00861467	-0.28562
	0.00856168	0.122086	-0.00194103	-0.280374
	0.048891	0.119143	-0.00147225	-0.245184
	0.0497875	0.0926194	0.00447886	-0.226632
	0.0182985	0.0579863	0.0111761	-0.260922
	0.000708668	0.037957	0.0158765	-0.329015
	0.0360645	0.0349863	0.0259798	-0.406376
	0.10431	0.0341924	0.0410057	-0.478582
	0.12901	0.0271687	0.0483196	-0.516993
	0.0722346	0.0207147	0.0562329	-0.508769
	-0.0111656	0.0201558	0.0688344	-0.480803
	-0.0362715	0.0220197	0.0694093	-0.451735
	0.014708	0.0223399	0.0535327	-0.41741
	0.0827497	0.0189506	0.0411622	-0.388236
	0.0960608	0.0152864	0.0447423	-0.380391
	0.0466971	0.0215856	0.0572984	-0.382504
	-0.00211908	0.0391538	0.0758168	-0.378216
	0.0107186	0.0562097	0.0982911	-0.377714
	0.067645	0.0636197	0.113839	-0.381929
	0.0912313	0.064616	0.126179	-0.369123
	0.0424126	0.0660312	0.149525	-0.341348
	-0.028659	0.0689361	0.176085	-0.327924
	-0.0428468	0.0647174	0.181997	-0.338506
	0.0175349	0.0444299	0.166418	-0.360683
	0.0888851	0.012852	0.148061	-0.388266
	0.0935335	-0.0114961	0.130425	-0.406228
	0.0254089	-0.0163662	0.113997	-0.393266
	-0.0420297	-0.0044212	0.108652	-0.36132
	-0.0377417	0.0141899	0.112077	-0.340437
	0.0283613	0.0212154	0.111105	-0.323667
	0.0774076	0.00806887	0.109212	-0.296319
	0.0562027	-0.0116015	0.109939	-0.281826
	0.00145078	-0.0220864	0.096158	-0.294159
	-0.00906235	-0.0245929	0.0666348	-0.306283
	0.0473198	-0.0261464	0.0469724	-0.309757
	0.115717	-0.0266305	0.0498632	-0.32386
	0.123126	-0.0194901	0.0643608	-0.34734
	0.0538456	0.00399216	0.0829627	-0.374558
	-0.0195152	0.0441846	0.097373	-0.422045
	-0.0124852	0.0787534	0.0964279	-0.477887
	0.0690355	0.0800295	0.0925714	-0.50253
	0.135444	0.0489798	0.105596	-0.503212
	0.118043	0.0157511	0.130033	-0.512044
	0.0335112	0.00583446	0.149432	-0.528129
	-0.0366404	0.0164882	0.163084	-0.553895
	-0.0281476	0.0253469	0.171301	-0.60778
	0.0328264	0.0165281	0.167737	-0.663511
	0.0624446	-0.00511472	0.163474	-0.676952
	0.0276485	-0.0172425	0.166896	-0.662122
	-0.0209388	-0.00721336	0.162286	-0.645221
	-0.019153	0.0108868	0.14299	-0.617885
	0.0368046	0.0146198	0.128798	-0.589022
	0.0926362	-0.00251133	0.128627	-0.588896
	0.0935737	-0.0243376	0.132816	-0.606137
	0.0481079	-0.0286235	0.138087	-0.616414
	0.0181836	-0.0142126	0.141173	-0.637496
	0.0368841	-0.00391371	0.131415	-0.674522
	0.0630087	-0.0138293	0.116029	-0.69762
	0.0429137	-0.0344231	0.113223	-0.70456
	-0.0188217	-0.0432814	0.119062	-0.720627
	-0.0730343	-0.0305937	0.121863	-0.735359
	-0.0682216	-0.00852468	0.126857	-0.735639
	-0.00127821	-0.000683253	0.137876	-0.744027
	0.0607998	-0.0150563	0.145437	-0.761987
	0.0421645	-0.0342037	0.148586	-0.768075
	-0.0383365	-0.0423213	0.154188	-0.767961
	-0.084854	-0.0456852	0.153025	-0.771283
	-0.0393401	-0.0599318	0.133436	-0.755255
	0.0585441	-0.0894435	0.113546	-0.708847
	0.120617	-0.118524	0.119563	-0.66217
	0.0996823	-0.128318	0.149012	-0.634019
	0.0388093	-0.111299	0.187901	-0.618126
	0.0214894	-0.0791805	0.231445	-0.615655
	0.0695987	-0.0555	0.271731	-0.628163
	0.114254	-0.0525863	0.295742	-0.641726
	0.0834979	-0.0581606	0.302279	-0.65639
	-0.00363406	-0.0555758	0.297288	-0.692527
	-0.0561705	-0.0487884	0.27813	-0.740235
	-0.0202511	-0.0555092	0.255463	-0.761751
	0.0593511	-0.0848	0.248991	-0.748835
	0.0933576	-0.12484	0.255761	-0.722432
	0.0469611	-0.153397	0.258042	-0.685458
	-0.0259754	-0.154205	0.256441	-0.635903
	-0.0500181	-0.133417	0.262538	-0.593574
	-0.0150693	-0.112805	0.270664	-0.572688
	0.0175609	-0.104798	0.276168	-0.569639
	-0.00550232	-0.101894	0.284896	-0.592407
	-0.0612566	-0.091916	0.285584	-0.640879
	-0.0717615	-0.0777385	0.261684	-0.676946
	-0.000628542	-0.0723728	0.226316	-0.675366
	0.0968952	-0.0831555	0.20413	-0.666159
	0.127858	-0.107483	0.185747	-0.671356
	0.0591096	-0.129519	0.168857	-0.677597
	-0.0432599	-0.132575	0.161704	-0.689186
	-0.0796047	-0.117407	0.161743	-0.712689
	-0.0322268	-0.0991013	0.161107	-0.722885
	0.0173362	-0.0889456	0.162838	-0.713382
	-0.00180225	-0.0849041	0.160377	-0.71857
	-0.0655027	-0.0785964	0.137969	-0.742342
	-0.0925938	-0.0710901	0.109609	-0.758242
	-0.0378925	-0.0717033	0.0978473	-0.778321
	0.0559138	-0.0827447	0.0979513	-0.809499
	0.101424	-0.0934975	0.0975068	-0.821504
	0.0642784	-0.0946373	0.0993412	-0.813887
	0.00646988	-0.0871522	0.105455	-0.815316
	0.00497346	-0.077963	0.113858	-0.814145
	0.0634734	-0.0779635	0.135092	-0.788072
	0.116491	-0.0892144	0.16968	-0.765007
	0.10153	-0.098653	0.194738	-0.765834
	0.0233406	-0.0961142	0.202002	-0.779456
	-0.047315	-0.0868785	0.20451	-0.816198
	-0.0489533	-0.0822403	0.201887	-0.887864
	-0.00646362	-0.0883809	0.188078	-0.955069
	0.00762721	-0.101518	0.175876	-0.986906
	-0.032478	-0.112407	0.176045	-1.00936
	-0.0775278	-0.114235	0.182687	-1.03572
	-0.0697807	-0.111687	0.193484	-1.04571
	-0.00405643	-0.118452	0.210457	-1.04173
	0.0623444	-0.137502	0.21479	-1.03353
	0.0622422	-0.151569	0.197178	-1.00302
	-0.00313975	-0.14544	0.175331	-0.949517
	-0.0593604	-0.122531	0.161171	-0.907489
	-0.0502449	-0.102585	0.148251	-0.881205
	0.0019956	-0.0991578	0.137627	-0.850145
	0.04044	-0.110772	0.136188	-0.821822
	0.0367897	-0.123228	0.133018	-0.805925
	0.0113544	-0.128701	0.117832	-0.780787
	0.0111087	-0.135486	0.102856	-0.735436
	0.0498443	-0.149557	0.100127	-0.694855
	0.0850736	-0.166795	0.0999344	-0.673301
	0.0713865	-0.176859	0.0966651	-0.667541
	0.0225163	-0.169411	0.093737	-0.68337
	-0.00481324	-0.146716	0.0866271	-0.713268
	0.0158051	-0.126054	0.0728251	-0.72539
	0.046133	-0.11635	0.061677	-0.712454
	0.0340826	-0.11264	0.0556958	-0.709753
	-0.0193361	-0.110263	0.0419496	-0.737999
	-0.0615648	-0.109326	0.0270971	-0.77963
	-0.0444178	-0.110898	0.033199	-0.817307
	0.0185467	-0.11772	0.0568387	-0.829364
	0.058651	-0.130009	0.0743602	-0.785471
	0.0263315	-0.137048	0.0750911	-0.688183
	-0.0472914	-0.128456	0.0640353	-0.57943
	-0.0879283	-0.112459	0.0494829	-0.481559
	-0.0659249	-0.103107	0.0495934	-0.391629
	-0.0212794	-0.103056	0.0731285	-0.328594
	-0.0115333	-0.106702	0.0976331	-0.311373
	-0.0503429	-0.114134	0.100087	-0.319357
	-0.098169	-0.127195	0.0917308	-0.334963
	-0.104657	-0.143689	0.0908415	-0.365626
	-0.0632316	-0.162371	0.0944511	-0.399309
	-0.0225345	-0.176046	0.10306	-0.414788
	-0.0246127	-0.170414	0.119669	-0.430948
	-0.0556602	-0.14595	0.134265	-0.460251
	-0.0731862	-0.118331	0.139714	-0.471709
	-0.0642002	-0.099656	0.145087	-0.455351
	-0.0497559	-0.0934829	0.148823	-0.436848
	-0.0627835	-0.0970821	0.135039	-0.411109
	-0.105825	-0.106524	0.111054	-0.36029
	-0.132066	-0.122838	0.0962593	-0.309552
	-0.104875	-0.143343	0.0932546	-0.268459
	-0.0524824	-0.154354	0.0973007	-0.20751
	-0.0302332	-0.151678	0.102967	-0.131366
	-0.0519988	-0.148383	0.0973774	-0.0774085
	-0.087339	-0.149259	0.0796312	-0.0480211
	-0.0902976	-0.147867	0.0779642	-0.0406913
	-0.0484101	-0.143681	0.106603	-0.0868513
	-0.00275433	-0.135781	0.139422	-0.18423
	-0.00163174	-0.122685	0.151343	-0.289434
	-0.0402404	-0.110866	0.144936	-0.386876
	-0.0730913	-0.109256	0.125784	-0.468612
	-0.0726453	-0.116411	0.101366	-0.498349
	-0.0512141	-0.126578	0.0844446	-0.470426
	-0.0377542	-0.136442	0.0690718	-0.432641
	-0.053461	-0.145849	0.0427991	-0.407057
	-0.0924095	-0.154384	0.0209379	-0.388013
	-0.125426	-0.167409	0.0353974	-0.393106
	-0.130606	-0.186299	0.0697459	-0.428092
	-0.124531	-0.19816	0.0967061	-0.457593
	-0.132859	-0.193045	0.107818	-0.462814
	-0.150991	-0.173864	0.101937	-0.460788
	-0.156754	-0.148986	0.0802555	-0.453197
	-0.139703	-0.127288	0.0604458	-0.433507
	-0.107966	-0.11982	0.0533555	-0.420299
	-0.0804535	-0.125847	0.0431072	-0.42546
	-0.0711992	-0.130719	0.0219845	-0.434058
	-0.0666077	-0.126538	0.0127674	-0.441087
	-0.0477675	-0.115338	0.0333811	-0.45619
	-0.0233209	-0.101965	0.0702199	-0.464751
	-0.0192152	-0.0952833	0.102856	-0.445819
	-0.0432201	-0.100171	0.119555	-0.416485
	-0.0725618	-0.114035	0.112242	-0.406232
	-0.074852	-0.134618	0.0941914	-0.422364
	-0.0491565	-0.156271	0.0929967	-0.463737
	-0.027078	-0.167138	0.112217	-0.528877
	-0.030086	-0.164522	0.125305	-0.590813
	-0.0464268	-0.155609	0.123168	-0.618845
	-0.0475377	-0.145382	0.124218	-0.625653
	-0.019761	-0.134157	0.137857	-0.63583
	0.0131348	-0.125149	0.162805	-0.642312
	0.017015	-0.116398	0.191668	-0.637729
	-0.00766242	-0.101143	0.214739	-0.633437
	-0.0245201	-0.084535	0.208707	-0.625101
	-0.00637956	-0.0782703	0.190094	-0.602164
	0.0356726	-0.0820675	0.18113	-0.587436
	0.0642315	-0.0867132	0.175598	-0.593085
	0.0529075	-0.0883341	0.159143	-0.587789
	0.00943845	-0.0851689	0.138526	-0.557782
	-0.0287614	-0.0774026	0.128378	-0.52419
	-0.0354239	-0.0746007	0.133321	-0.48654
	-0.0259769	-0.0822999	0.154272	-0.439886
	-0.0268999	-0.0906436	0.178615	-0.423903
	-0.0364628	-0.0947288	0.179733	-0.456213
	-0.035701	-0.100627	0.15475	-0.496578
	-0.0155267	-0.10869	0.128765	-0.519553
	0.0198511	-0.11658	0.117771	-0.524342
	0.0516018	-0.124876	0.114718	-0.484729
	0.0642287	-0.132112	0.0718403	-0.397335
	0.0689093	-0.138335	0.0834485	-0.316149
	0.0818661	-0.145927	0.0954987	-0.261034
	0.0925667	-0.153212	0.101459	-0.203006
	0.083652	-0.153871	0.113315	-0.144514
	0.0560349	-0.146239	0.127399	-0.102924
	0.0229151	-0.13288	0.128398	-0.0675995
	0.00154561	-0.122995	0.116983	-0.0498985
	0.00600996	-0.128006	0.0995593	-0.0886522
	0.0193359	-0.143919	0.0792422	-0.158006
	0.0105229	-0.15173	0.0677673	-0.194027
	-0.0219139	-0.142596	0.0714366	-0.18992
	-0.0484929	-0.126303	0.0732939	-0.169314
	-0.0514658	-0.1153	0.0660211	-0.136441
	-0.0345693	-0.113153	0.0670171	-0.110554
	-0.0139585	-0.115508	0.0784268	-0.116231
	-0.00745262	-0.117846	0.0768931	-0.121906
	-0.00953027	-0.117864	0.0572448	-0.0890375
	0.00908366	-0.122695	0.037981	-0.0449242
	0.0558569	-0.141622	0.0307047	-0.0231121
	0.0901375	-0.165712	0.0391513	-0.0135666
	0.0753753	-0.176037	0.0637641	-0.0170864
	0.0237409	-0.165157	0.0842731	-0.0468469
	-0.0222288	-0.140453	0.0784349	-0.0851292
	-0.0298662	-0.116912	0.0608235	-0.110278
	0.00170053	-0.108023	0.0581965	-0.127148
	0.0405003	-0.112051	0.0665226	-0.129764
	0.0568587	-0.109823	0.068699	-0.0947093
	0.0626332	-0.0938993	0.0600442	-0.0280017
	0.0864163	-0.0790093	0.0418328	0.0368883
	0.121031	-0.0827738	0.0192534	0.0858215
	0.129361	-0.103138	0.0121384	0.110721
	0.0896738	-0.1194	0.0289893	0.0860711
	0.0241559	-0.113444	0.0422804	0.010229
	-0.0205843	-0.0922323	0.0313501	-0.0759982
	-0.0151454	-0.0775776	0.011222	-0.139429
	0.0271856	-0.0803098	0.0017918	-0.175368
	0.0673545	-0.094254	-0.00139272	-0.177479
	0.0725718	-0.105105	-0.00497252	-0.146353
	0.0500994	-0.111133	-0.0102516	-0.116061
	0.0352037	-0.126915	-0.0239273	-0.109335
	0.0459743	-0.15852	-0.0407638	-0.109358
	0.0661425	-0.186882	-0.0619649	-0.105511
	0.0782654	-0.189434	-0.0394848	-0.101835
	0.08545	-0.165943	-0.0284915	-0.0761218
	0.101077	-0.132004	-0.0210873	-0.00928412
	0.132645	-0.100105	-0.000903648	0.0630076
	0.164318	-0.0753476	0.0261478	0.107747
	0.165215	-0.0590356	0.0514745	0.133898
	0.125727	-0.0512927	0.0759753	0.139131
	0.0807844	-0.0510043	0.0936993	0.115079
	0.0722115	-0.0615744	0.0909375	0.0978669
	0.0980907	-0.0877977	0.0762236	0.117637
	0.119153	-0.122326	0.0651506	0.144374
	0.105887	-0.150435	0.0541397	0.160942
	0.0639248	-0.164628	0.0389387	0.184181
	0.0250766	-0.161435	0.0253763	0.193006
	0.0132034	-0.143436	0.0157236	0.161728
	0.0136722	-0.121308	0.0139409	0.117751
	-0.00308444	-0.105472	0.0324209	0.081199
	-0.030801	-0.0998111	0.0608914	0.0334485
	-0.0381836	-0.102725	0.0671627	-0.0143985
	-0.00870771	-0.114142	0.0471439	-0.0323179
	0.0444995	-0.135553	0.0228609	-0.0332215
	0.0912109	-0.161992	0.000849157	-0.0303759
	0.100829	-0.181332	-0.020895	-0.0046301
	0.0797288	-0.185026	-0.0337163	0.0321136
	0.0734917	-0.175373	-0.0354464	0.0344513
	0.10649	-0.161335	-0.031393	0.00430362
	0.15241	-0.150776	-0.0142593	-0.0242526
	0.167535	-0.145595	0.0128812	-0.049934
	0.137566	-0.140592	0.0259954	-0.062843
	0.0893524	-0.135326	0.0148499	-0.0281969
	0.0711677	-0.139957	-0.00290627	0.0434737
	0.0991241	-0.160568	-0.01946	0.100967
	0.133345	-0.190182	-0.0376304	0.132851
	0.130753	-0.209788	-0.046846	0.154383
	0.0973542	-0.203571	-0.0402801	0.162181
	0.0711973	-0.17942	-0.0342564	0.171135
	0.0724531	-0.156117	-0.0358738	0.200343
	0.0943907	-0.146146	-0.0337546	0.222355
	0.121029	-0.15018	-0.0266655	0.195282
	0.134575	-0.1613	-0.0229592	0.127945
	0.13193	-0.168041	-0.0179368	0.0508214
	0.130201	-0.166359	-0.00859761	-0.0283268
	0.138307	-0.165644	-0.00751496	-0.0942689
	0.135749	-0.173429	-0.0147475	-0.116753
	0.104572	-0.183376	-0.0183359	-0.0876276
	0.0559027	-0.182296	-0.0167504	-0.0229685
	0.0239038	-0.167471	-0.0160262	0.0679424
	0.0346616	-0.14955	-0.00957182	0.169104
	0.082462	-0.144429	0.00938828	0.237045
	0.131148	-0.158711	0.0281803	0.256957
	0.149034	-0.182878	0.0376272	0.261174
	0.139157	-0.19617	0.0448143	0.268766
	0.130667	-0.191061	0.054883	0.270326
	0.139873	-0.183881	0.0646407	0.270317
	0.147809	-0.185626	0.077077	0.279154
	0.133439	-0.188522	0.0905861	0.288211
	0.105269	-0.18577	0.0844317	0.309418
	0.0876742	-0.177983	0.0528206	0.369127
	0.0927663	-0.172803	0.0194237	0.448295
	0.113626	-0.180991	0.00408641	0.500181
	0.128591	-0.203112	0.0036676	0.516327
	0.12076	-0.222719	0.0137965	0.502389
	0.101266	-0.224721	0.0295357	0.446032
	0.0996355	-0.210245	0.0390899	0.367953
	0.123983	-0.190708	0.043115	0.319303
	0.150438	-0.174099	0.0509224	0.299007
	0.151192	-0.157922	0.0565651	0.278638
	0.119199	-0.134274	0.0474497	0.271384
	0.0735384	-0.107771	0.0334159	0.292028
	0.046508	-0.0961868	0.0281865	0.321318
	0.0468326	-0.111255	0.0251095	0.368602
	0.0515058	-0.146584	0.0232246	0.457323
	0.0415537	-0.176914	0.0294759	0.545052
	0.0295542	-0.181692	0.0354714	0.583202
	0.0349932	-0.166505	0.0337324	0.581537
	0.0572234	-0.155786	0.0375652	0.545341
	0.0793247	-0.164131	0.0501324	0.463841
	0.0811052	-0.178683	0.0563466	0.370291
	0.0622773	-0.177085	0.0612865	0.302177
	0.0502354	-0.160342	0.0779017	0.234813
	0.0661118	-0.146648	0.0962801	0.150184
	0.0911249	-0.14507	0.106897	0.0785955
	0.0932482	-0.150339	0.117292	0.0293078
	0.0643422	-0.150306	0.122106	-0.0124093
	0.020199	-0.134974	0.11224	-0.0264461
	-0.0089732	-0.112372	0.101999	5.93494e-05
	-0.00173828	-0.102257	0.101902	0.0231144
	0.0269905	-0.109424	0.103138	0.0231153
	0.0461631	-0.119036	0.10926	0.030118
	0.0494265	-0.122126	0.135706	0.0490125
	0.0544288	-0.11594	0.168349	0.0526591
	0.0690243	-0.105579	0.182446	0.039576
	0.0819341	-0.10355	0.183313	0.0153061
	0.0719864	-0.111844	0.184301	-0.0320909
	0.029683	-0.121853	0.180452	-0.0852627
	-0.0300715	-0.127671	0.173342	-0.115435
	-0.0670563	-0.133773	0.171918	-0.135824
	-0.0508827	-0.148759	0.169173	-0.160162
	6.57447e-05	-0.174934	0.162098	-0.165008
	0.0344066	-0.199598	0.1669	-0.141399
	0.0252237	-0.205203	0.182566	-0.122978
	-0.00661079	-0.191501	0.181167	-0.127869
	-0.0219876	-0.178182	0.155956	-0.144768
	-0.00263939	-0.180828	0.129435	-0.179025
	0.0283345	-0.194545	0.119103	-0.239425
	0.0319796	-0.202832	0.127938	-0.300328
	0.00314726	-0.194473	0.14802	-0.331692
	-0.0196997	-0.173379	0.16204	-0.340452
	-0.00344724	-0.159799	0.153142	-0.339018
	0.0373124	-0.167659	0.130862	-0.324085
	0.0587524	-0.183831	0.124379	-0.313465
	0.0405535	-0.183154	0.13245	-0.332384
	0.0083421	-0.168584	0.138284	-0.368158
	-8.05652e-06	-0.159826	0.136184	-0.402864
	0.0297837	-0.167286	0.134702	-0.440459
	0.0755061	-0.189053	0.138005	-0.465249
	0.0909582	-0.208103	0.153235	-0.451772
	0.05902	-0.204672	0.188216	-0.425993
	0.0194502	-0.185872	0.23051	-0.427001
	0.022233	-0.179698	0.258796	-0.441047
	0.0688478	-0.193934	0.272714	-0.444189
	0.120969	-0.209836	0.280174	-0.446044
	0.135135	-0.20898	0.275054	-0.441026
	0.100158	-0.19314	0.257841	-0.409242
	0.0514497	-0.18108	0.240213	-0.375797
	0.0295354	-0.190363	0.226933	-0.366112
	0.0273954	-0.213258	0.215555	-0.360514
	0.00604291	-0.226918	0.210422	-0.359586
	-0.048522	-0.223218	0.210694	-0.397339
	-0.108016	-0.214829	0.204739	-0.457533
	-0.130636	-0.219024	0.200358	-0.492938
	-0.0968519	-0.239207	0.211542	-0.508607
	-0.0292055	-0.259367	0.225831	-0.512989
	0.0261743	-0.261279	0.223063	-0.490001
	0.0520493	-0.24218	0.204872	-0.461284
	0.072921	-0.220177	0.176219	-0.46054
	0.101218	-0.210643	0.141849	-0.459367
	0.116317	-0.207257	0.12366	-0.424087
	0.0975993	-0.194866	0.132255	-0.384084
	0.0463469	-0.170124	0.144307	-0.365751
	-0.0102573	-0.146414	0.148177	-0.36186
	-0.0287526	-0.151149	0.159137	-0.375405
	0.00668995	-0.194555	0.175317	-0.399841
	0.0540841	-0.243297	0.180503	-0.393412
	0.0711701	-0.255954	0.173561	-0.355384
	0.064392	-0.236155	0.156217	-0.344874
	0.065423	-0.223432	0.124942	-0.377219
	0.0917099	-0.243227	0.0951017	-0.40738
	0.132278	-0.285904	0.086972	-0.413342
	0.152249	-0.314294	0.0901361	-0.40007
	0.125751	-0.303333	0.0878819	-0.362947
	0.0733217	-0.273468	0.0878599	-0.315737
	0.0385349	-0.263771	0.0951564	-0.296229
	0.036284	-0.283688	0.0951957	-0.30751
	0.0446983	-0.307443	0.0914208	-0.328999
	0.0432197	-0.305065	0.0984814	-0.358477
	0.0381246	-0.27602	0.109345	-0.388445
	0.0461692	-0.246125	0.112085	-0.39886
	0.0737082	-0.236186	0.109955	-0.397898
	0.107436	-0.238616	0.105121	-0.417156
	0.121317	-0.232245	0.0888785	-0.449751
	0.101451	-0.209154	0.0703748	-0.458373
	0.0731291	-0.187281	0.0641993	-0.444609
	0.0731563	-0.189408	0.0654148	-0.438752
	0.104683	-0.218829	0.065612	-0.44799
	0.13337	-0.250253	0.0682123	-0.466198
	0.125974	-0.258494	0.0758621	-0.496116
	0.0881233	-0.245775	0.0790002	-0.526091
	0.0572238	-0.234914	0.0772544	-0.537698
	0.0636191	-0.237012	0.0807133	-0.551614
	0.0966726	-0.236018	0.0844322	-0.591454
	0.118708	-0.216322	0.0819264	-0.635482
	0.106291	-0.184339	0.0814178	-0.665853
	0.0851134	-0.162118	0.0909889	-0.701079
	0.100691	-0.172429	0.100587	-0.741751
	0.154996	-0.213839	0.105564	-0.768366
	0.204518	-0.253876	0.112184	-0.791612
	0.215158	-0.267875	0.116601	-0.822089
	0.189983	-0.263792	0.112417	-0.841286
	0.15935	-0.263437	0.108923	-0.855097
	0.154915	-0.271941	0.114507	-0.889233
	0.176056	-0.273646	0.122603	-0.918269
	0.191189	-0.249873	0.136968	-0.903374
	0.182303	-0.205029	0.160486	-0.875562
	0.162562	-0.169836	0.177544	-0.870046
	0.152715	-0.175673	0.175101	-0.87117
	0.157534	-0.219423	0.162759	-0.878247
	0.164574	-0.266024	0.149791	-0.912051
	0.153215	-0.282226	0.135842	-0.956311
	0.122378	-0.273192	0.133122	-0.992589
	0.102147	-0.268744	0.149294	-1.0437
	0.117395	-0.282355	0.167046	-1.10299
	0.151826	-0.297814	0.175537	-1.12681
	0.168167	-0.292189	0.180416	-1.11756
	0.155635	-0.266464	0.175558	-1.10411
	0.130239	-0.247769	0.155382	-1.08276
	0.114977	-0.256463	0.139064	-1.06159
	0.123029	-0.282071	0.139407	-1.08096
	0.138438	-0.296894	0.144124	-1.13749
	0.130713	-0.283214	0.14801	-1.18909
	0.103719	-0.254884	0.155078	-1.23266
	0.0917364	-0.241538	0.151127	-1.2785
	0.110947	-0.25362	0.129436	-1.30506
	0.150698	-0.273756	0.109222	-1.30371
	0.186124	-0.282449	0.0986038	-1.29323
	0.188223	-0.280717	0.0887273	-1.26533
	0.155674	-0.28765	0.0828059	-1.20498
	0.123394	-0.316685	0.0897882	-1.14449
	0.116696	-0.355547	0.0989631	-1.12374
	0.118029	-0.370604	0.0995517	-1.1419
	0.104833	-0.346558	0.0951656	-1.18963
	0.0813484	-0.303299	0.0847892	-1.26353
	0.0696325	-0.280721	0.0644319	-1.33632
	0.0799641	-0.293759	0.0536867	-1.38329
	0.100485	-0.314077	0.0712552	-1.41462
	0.111082	-0.307206	0.102586	-1.43742
	0.100599	-0.277808	0.1245	-1.43799
	0.0825731	-0.261081	0.132245	-1.4228
	0.0811747	-0.28677	0.129916	-1.41944
	0.0975313	-0.346812	0.116682	-1.4335
	0.105197	-0.395402	0.0989401	-1.45554
	0.0885312	-0.399136	0.0848098	-1.4981
	0.0639999	-0.373699	0.0693972	-1.56755
	0.0623721	-0.355298	0.0501794	-1.63498
	0.0987977	-0.354045	0.0360169	-1.67906
	0.156017	-0.354548	0.0320275	-1.71047
	0.200501	-0.344495	0.0267269	-1.72537
	0.213318	-0.333234	0.0148903	-1.70182
	0.201631	-0.344357	0.00548821	-1.65308
	0.18655	-0.388607	-0.00198401	-1.6099
	0.175876	-0.445009	-0.0112716	-1.5782
	0.154741	-0.479286	-0.0102315	-1.56442
	0.114861	-0.472618	0.00574044	-1.58166
	0.0710964	-0.442524	0.0155633	-1.60672
	0.037105	-0.421485	0.00964311	-1.60937
	0.014707	-0.422149	-0.00672474	-1.61565
	0.000912713	-0.429359	-0.0325596	-1.64802
	-0.0167453	-0.426557	-0.0659176	-1.67891
	-0.0491993	-0.416384	-0.084273	-1.69708
	-0.0800898	-0.420324	-0.0749269	-1.72033
	-0.0861022	-0.447684	-0.0469435	-1.73665
	-0.0622566	-0.483389	-0.00435396	-1.73241
	-0.017539	-0.504557	0.0411691	-1.73957
	0.0287129	-0.502358	0.0600885	-1.7583
	0.0545668	-0.490031	0.0445176	-1.74812
	0.0555998	-0.490356	0.0159359	-1.72014
	0.05114	-0.507191	-0.0133544	-1.71622
	0.0576396	-0.516944	-0.047488	-1.73325
	0.0765305	-0.503625	-0.0768536	-1.76158
	0.10217	-0.479352	-0.0912723	-1.82054
	0.123466	-0.465668	-0.0957798	-1.89079
	0.129835	-0.47455	-0.087238	-1.93054
	0.125162	-0.498084	-0.0673356	-1.94938
	0.121442	-0.510612	-0.0566709	-1.96204
	0.115732	-0.505197	-0.0807729	-1.94091
	0.09903	-0.506357	-0.109162	-1.88179
	0.0767818	-0.534031	-0.119074	-1.83123
	0.0549719	-0.572482	-0.116967	-1.80764
	0.0365682	-0.587839	-0.105233	-1.79896
	0.034614	-0.566461	-0.0839293	-1.81415
	0.0555198	-0.532277	-0.0714126	-1.84706
	0.0784631	-0.516863	-0.0719494	-1.85613
	0.087013	-0.527965	-0.0687828	-1.83012
	0.0846954	-0.54044	-0.0646313	-1.80151
	0.0766537	-0.528458	-0.0749269	-1.7848
	0.0644394	-0.494488	-0.0917756	-1.78267
	0.04938	-0.466096	-0.10134	-1.81429
	0.0258277	-0.463644	-0.106271	-1.86951
	-0.00606179	-0.480689	-0.105803	-1.90848
	-0.0231845	-0.493676	-0.0930373	-1.92738
	-0.00783561	-0.487402	-0.0783944	-1.94939
	0.0239311	-0.476313	-0.0759267	-1.96626
	0.0412522	-0.490469	-0.0728691	-1.95818
	0.0328798	-0.533172	-0.0526522	-1.93531
	0.0155547	-0.576448	-0.0262846	-1.91233
	0.00723501	-0.588543	-0.005205	-1.88544
	0.00875941	-0.556982	0.0103366	-1.85342
	0.012831	-0.508612	0.0190243	-1.826
	0.0137239	-0.488154	0.0142426	-1.80233
	0.00883562	-0.503631	0.00386927	-1.78462
	0.00498051	-0.524695	-0.0111993	-1.79439
	0.00857272	-0.533893	-0.0359268	-1.82494
	0.00703418	-0.539033	-0.0689338	-1.83196
	-0.0200735	-0.553311	-0.0941912	-1.80171
	-0.0697817	-0.578332	-0.100847	-1.76496
	-0.107214	-0.602976	-0.0994323	-1.73753
	-0.100631	-0.604862	-0.100895	-1.72134
	-0.0518658	-0.580295	-0.104365	-1.73647
	0.00725249	-0.552993	-0.107356	-1.78307
	0.0416263	-0.546799	-0.104976	-1.82925
	0.0364591	-0.557163	-0.0888468	-1.866
	0.0126089	-0.564721	-0.0712333	-1.90401
	0.00261005	-0.562987	-0.0814972	-1.92471
	0.0132903	-0.565126	-0.115365	-1.91175
	0.0323789	-0.580854	-0.140737	-1.89793
	0.0500355	-0.603784	-0.146048	-1.90715
	0.0598259	-0.616208	-0.140776	-1.9221
	0.0613154	-0.608091	-0.135661	-1.94572
	0.0621589	-0.592148	-0.138783	-1.99407
	0.057228	-0.586744	-0.151435	-2.04557
	0.0334063	-0.596532	-0.15347	-2.08626
	-0.000319148	-0.61337	-0.134231	-2.14266
	-0.0203912	-0.622897	-0.113958	-2.20512
	-0.0129417	-0.618362	-0.101605	-2.22993
	0.0163396	-0.614497	-0.0837553	-2.22095
	0.0430858	-0.627598	-0.0627498	-2.19967
	0.0395629	-0.64917	-0.052439	-2.16101
	0.00731271	-0.658679	-0.0495808	-2.12718
	-0.0224159	-0.649691	-0.0540329	-2.14115
	-0.0335674	-0.626896	-0.0732525	-2.18442
	-0.0389433	-0.60665	-0.0853291	-2.21709
	-0.053165	-0.604559	-0.0627583	-2.25259
	-0.0713743	-0.614158	-0.0237366	-2.30324
	-0.0781986	-0.614613	0.000971133	-2.34257
	-0.060166	-0.604326	0.00745927	-2.36369
	-0.0283067	-0.594438	-0.00182423	-2.38939
	-0.021375	-0.593361	-0.0180537	-2.41431
	-0.0608628	-0.597906	-0.0147187	-2.42364
	-0.112971	-0.598205	0.00995682	-2.43056
	-0.128184	-0.58618	0.0205361	-2.4326
	-0.100712	-0.564389	0.00408525	-2.40443
	-0.0614008	-0.547715	-0.0116546	-2.3519
	-0.0444481	-0.549423	-0.00992588	-2.30049
	-0.0623106	-0.568403	0.00313585	-2.2489
	-0.0860164	-0.59563	0.0212003	-2.20288
	-0.0730986	-0.621865	0.0319484	-2.2001
	-0.0218093	-0.642068	0.0175386	-2.24287
	0.0238613	-0.654655	-0.0119591	-2.29571
	0.0286911	-0.658099	-0.0361859	-2.34062
	0.00235991	-0.647264	-0.0625283	-2.36937
	-0.0166903	-0.62212	-0.109044	-2.35677
	-0.0100912	-0.596629	-0.161895	-2.29143
	-0.000827358	-0.582123	-0.190899	-2.20503
	-0.0214564	-0.58267	-0.190472	-2.13696
	-0.0738106	-0.597612	-0.171816	-2.10333
	-0.116725	-0.616941	-0.154539	-2.11037
	-0.106153	-0.626887	-0.157675	-2.15383
	-0.0484844	-0.632773	-0.179027	-2.20095
	0.000896514	-0.640625	-0.191463	-2.22249
	0.00500061	-0.646625	-0.179425	-2.23085
	-0.0206207	-0.647508	-0.162592	-2.23913
	-0.0356626	-0.646335	-0.164371	-2.22833
	-0.0172003	-0.641431	-0.178517	-2.1934
	0.0233831	-0.635072	-0.183582	-2.15501
	0.0529665	-0.633361	-0.170714	-2.11455
	0.0496675	-0.635016	-0.144313	-2.07184
	0.0272983	-0.631766	-0.115579	-2.05451
	0.0185822	-0.622976	-0.10014	-2.06766
	0.0322818	-0.613433	-0.0932786	-2.08752
	0.0442572	-0.607312	-0.0725438	-2.116
	0.0321716	-0.607147	-0.0361808	-2.16052
	-0.000491503	-0.614764	-0.0114269	-2.18993
	-0.0354151	-0.627525	-0.00786585	-2.18666
	-0.0547874	-0.635911	-0.0125488	-2.18408
	-0.0626963	-0.634208	-0.0168602	-2.19571
	-0.0812301	-0.624246	-0.00759222	-2.19995
	-0.111973	-0.610062	0.0223024	-2.20798
	-0.124059	-0.599552	0.0495563	-2.23579
	-0.098438	-0.60053	0.0469199	-2.25436
	-0.0533222	-0.606804	0.0260665	-2.24838
	-0.0209877	-0.610103	0.0128876	-2.24443
	-0.0283231	-0.608108	0.00865902	-2.24109
	-0.0683003	-0.607564	0.00344997	-2.22325
	-0.0948245	-0.615952	-0.00613453	-2.22602
	-0.0718057	-0.632276	-0.0346841	-2.26945
	-0.0187805	-0.64051	-0.0644268	-2.32255
	0.014939	-0.63476	-0.0605039	-2.37257
	0.00419682	-0.63183	-0.0285888	-2.41993
	-0.0348773	-0.650208	-0.0106645	-2.4282
	-0.0642442	-0.684941	-0.0204024	-2.38117
	-0.0607368	-0.714842	-0.0413268	-2.32074
	-0.0447089	-0.71973	-0.0616121	-2.27315
	-0.0573176	-0.69797	-0.0704652	-2.23247
	-0.100337	-0.665694	-0.0616164	-2.21741
	-0.128909	-0.640985	-0.058694	-2.25026
	-0.113489	-0.632515	-0.0768377	-2.29988
	-0.0709621	-0.638445	-0.0882561	-2.33012
	-0.0389215	-0.64966	-0.0728116	-2.34894
	-0.0407273	-0.662599	-0.0543108	-2.36034
	-0.0660566	-0.676264	-0.0588931	-2.35441
	-0.0732075	-0.6856	-0.0765915	-2.34507
	-0.0430027	-0.682112	-0.105107	-2.34643
	-0.0156797	-0.658686	-0.128308	-2.34062
	-0.034196	-0.621794	-0.130978	-2.32478
	-0.0839779	-0.59106	-0.123568	-2.3273
	-0.11451	-0.582454	-0.133338	-2.34857
	-0.097612	-0.5889	-0.157998	-2.36879
	-0.0515903	-0.596197	-0.171935	-2.39253
	-0.0245194	-0.599527	-0.163903	-2.42794
	-0.0477338	-0.609344	-0.143808	-2.4625
	-0.101195	-0.634516	-0.124547	-2.48615
	-0.132336	-0.668634	-0.113758	-2.50686
	-0.117881	-0.68885	-0.11419	-2.52141
	-0.0902749	-0.680623	-0.11218	-2.51228
	-0.0954015	-0.646697	-0.0932934	-2.48734
	-0.134676	-0.607153	-0.0727644	-2.47171
	-0.165519	-0.587327	-0.0768526	-2.46325
	-0.152066	-0.590299	-0.10389	-2.44575
	-0.103853	-0.595347	-0.127756	-2.42569
	-0.0652666	-0.594481	-0.138915	-2.40528
	-0.0685293	-0.598011	-0.145379	-2.37587
	-0.0949153	-0.615936	-0.153136	-2.35481
	-0.103062	-0.641668	-0.16195	-2.35883
	-0.0868888	-0.653679	-0.164352	-2.36418
	-0.0868878	-0.633811	-0.140732	-2.35613
	-0.131027	-0.592562	-0.0896289	-2.3589
	-0.190271	-0.563418	-0.0485264	-2.37449
	-0.208585	-0.564776	-0.0418548	-2.37748
	-0.162758	-0.585256	-0.0529368	-2.37701
	-0.0845176	-0.60133	-0.0578159	-2.39386
	-0.0334011	-0.60636	-0.0508985	-2.41269
	-0.0401654	-0.614653	-0.0316054	-2.42053
	-0.0691467	-0.638519	-0.0128628	-2.43332
	-0.065071	-0.664736	-0.0184985	-2.44548
	-0.0233666	-0.672915	-0.0385073	-2.44063
	0.00797006	-0.654357	-0.0435895	-2.44917
	-0.0114537	-0.624432	-0.0332486	-2.48548
	-0.0747566	-0.609432	-0.0234277	-2.50275
	-0.134216	-0.621558	-0.0182082	-2.48067
	-0.147651	-0.646858	-0.0224328	-2.44999
	-0.127304	-0.663945	-0.0388728	-2.41624
	-0.121536	-0.667806	-0.0442566	-2.3769
	-0.148984	-0.675545	-0.023798	-2.36867
	-0.181888	-0.696637	-0.00231898	-2.39203
	-0.181967	-0.715681	0.00397843	-2.40783
	-0.140004	-0.711401	0.00814691	-2.42253
	-0.0858382	-0.684781	0.00737599	-2.46251
	-0.0678452	-0.658216	-0.00984761	-2.50993
	-0.096836	-0.658353	-0.0312852	-2.5383
	-0.129171	-0.687371	-0.0435771	-2.54426
	-0.123581	-0.716266	-0.049634	-2.50663
	-0.0966823	-0.716792	-0.0432333	-2.40968
	-0.0911696	-0.6958	-0.0184582	-2.30057
	-0.117803	-0.680063	0.000735716	-2.24325
	-0.150268	-0.685	-0.00665385	-2.24939
	-0.152283	-0.701646	-0.0279412	-2.30798
	-0.112025	-0.703129	-0.0476683	-2.41578
	-0.0637908	-0.684522	-0.0622801	-2.53395
	-0.0574305	-0.667301	-0.0660208	-2.60882
	-0.0954415	-0.671741	-0.0657715	-2.63531
	-0.132811	-0.693995	-0.0848003	-2.63307
	-0.134594	-0.713813	-0.123446	-2.60867
	-0.106827	-0.712125	-0.149839	-2.58161
	-0.0828645	-0.696763	-0.145111	-2.57952
	-0.0911234	-0.695617	-0.125585	-2.59362
	-0.123741	-0.719895	-0.114239	-2.6008
	-0.140502	-0.744682	-0.118524	-2.60269
	-0.116658	-0.74242	-0.132681	-2.60033
	-0.0789829	-0.712653	-0.140561	-2.57952
	-0.0727485	-0.679901	-0.134929	-2.53983
	-0.106766	-0.668728	-0.128773	-2.50708
	-0.144052	-0.685851	-0.146161	-2.49645
	-0.147086	-0.712515	-0.181904	-2.49991
	-0.112505	-0.725019	-0.198702	-2.52321
	-0.0731192	-0.721306	-0.176586	-2.57419
	-0.0649093	-0.721725	-0.134089	-2.62283
	-0.0948823	-0.733396	-0.0978603	-2.64153
	-0.131344	-0.73901	-0.0788245	-2.64519
	-0.137955	-0.723095	-0.0792876	-2.64397
	-0.114544	-0.684989	-0.0869403	-2.63094
	-0.0916379	-0.645653	-0.0848923	-2.62521
	-0.0906061	-0.634436	-0.0802654	-2.64092
	-0.105062	-0.655302	-0.0917534	-2.65579
	-0.112932	-0.678048	-0.112376	-2.66959
	-0.0974682	-0.679866	-0.124924	-2.71255
	-0.0683793	-0.667306	-0.131748	-2.77669
	-0.0542869	-0.664271	-0.131481	-2.82725
	-0.065584	-0.68204	-0.121465	-2.86174
	-0.0761976	-0.705347	-0.119794	-2.87668
	-0.0656371	-0.704213	-0.134527	-2.84806
	-0.0506652	-0.677045	-0.14227	-2.79094
	-0.059672	-0.654443	-0.131968	-2.75596
	-0.0961291	-0.659877	-0.125214	-2.74785
	-0.130236	-0.686219	-0.126889	-2.74011
	-0.122543	-0.706909	-0.124972	-2.74614
	-0.0743309	-0.701161	-0.120777	-2.77436
	-0.0356786	-0.683884	-0.113734	-2.79845
	-0.0477582	-0.68878	-0.100494	-2.82155
	-0.0940548	-0.726525	-0.101235	-2.85634
	-0.130677	-0.765965	-0.128742	-2.86734
	-0.127769	-0.77068	-0.151427	-2.83648
	-0.090476	-0.741011	-0.142646	-2.80928
	-0.055303	-0.709684	-0.12239	-2.80943
	-0.0558226	-0.704907	-0.113512	-2.82046
	-0.0818157	-0.728746	-0.11662	-2.84896
	-0.0962458	-0.757959	-0.130553	-2.89761
	-0.0830452	-0.768771	-0.144365	-2.9304
	-0.059486	-0.770101	-0.140909	-2.9264
	-0.05218	-0.786934	-0.135925	-2.902
	-0.0701092	-0.821361	-0.15228	-2.86102
	-0.089298	-0.845375	-0.175468	-2.8043
	-0.0742258	-0.835526	-0.172005	-2.76836
	-0.0298883	-0.790369	-0.147387	-2.77948
	-0.00893647	-0.736693	-0.125526	-2.81338
	-0.0416549	-0.708838	-0.115917	-2.84799
	-0.0961547	-0.711663	-0.125603	-2.88616
	-0.122449	-0.721912	-0.154065	-2.90937
	-0.11129	-0.725273	-0.176891	-2.89125
	-0.0957545	-0.724922	-0.173933	-2.84602
	-0.10401	-0.735267	-0.158717	-2.79379
	-0.130483	-0.75812	-0.15015	-2.73104
	-0.139491	-0.769198	-0.150592	-2.66728
	-0.110613	-0.740741	-0.154359	-2.62891
	-0.066239	-0.685652	-0.158731	-2.6171
	-0.0474795	-0.648318	-0.157898	-2.61803
	-0.0605124	-0.658525	-0.154269	-2.63033
	-0.0724758	-0.705429	-0.160153	-2.6412
	-0.0542841	-0.752152	-0.170384	-2.62301
	-0.0162194	-0.76562	-0.162199	-2.57545
	0.00979549	-0.748982	-0.128257	-2.53032
	0.00244257	-0.736929	-0.0954883	-2.49896
	-0.0294513	-0.745593	-0.0887407	-2.46515
	-0.0499551	-0.752931	-0.104022	-2.43605
	-0.032807	-0.733845	-0.129889	-2.43305
	0.00436821	-0.70121	-0.159823	-2.44923
	0.016261	-0.690412	-0.180415	-2.4784
	-0.0168686	-0.721778	-0.184795	-2.52439
	-0.0669735	-0.780564	-0.190354	-2.55519
	-0.0903068	-0.826151	-0.203108	-2.53642
	-0.0676226	-0.82654	-0.206699	-2.49644
	-0.0201261	-0.797065	-0.199572	-2.46918
	0.0116213	-0.776144	-0.19609	-2.45298
	0.0131077	-0.780719	-0.198241	-2.46129
	0.010286	-0.794278	-0.202342	-2.50812
	0.0255866	-0.791371	-0.2125	-2.55139
	0.0414965	-0.764043	-0.218219	-2.54648
	0.0300704	-0.737733	-0.211735	-2.51402
	-0.00907113	-0.74186	-0.2103	-2.48899
	-0.0455771	-0.773474	-0.223714	-2.47494
	-0.0490481	-0.79989	-0.231845	-2.47782
	-0.0180803	-0.800442	-0.222394	-2.49925
	0.00792933	-0.783666	-0.208095	-2.51069
	-0.00909888	-0.777099	-0.193834	-2.50647
	-0.063605	-0.795217	-0.182109	-2.5303
	-0.119382	-0.818865	-0.18671	-2.5824
	-0.148208	-0.821351	-0.199866	-2.6124
	-0.148066	-0.804339	-0.198104	-2.61999
	-0.138904	-0.79379	-0.186039	-2.63103
	-0.143088	-0.806047	-0.180846	-2.63193
	-0.158531	-0.829829	-0.17913	-2.61973
	-0.160157	-0.837639	-0.179499	-2.62604
	-0.139337	-0.816493	-0.188398	-2.64602
	-0.115253	-0.781023	-0.19221	-2.65555
	-0.104648	-0.763742	-0.18023	-2.66527
	-0.104879	-0.776135	-0.176971	-2.67541
	-0.111216	-0.793869	-0.196995	-2.66048
	-0.117981	-0.790339	-0.21675	-2.62647
	-0.118	-0.770791	-0.221727	-2.60458
	-0.117964	-0.760428	-0.219746	-2.59259
	-0.12336	-0.773883	-0.215002	-2.57681
	-0.120207	-0.798977	-0.211808	-2.57877
	-0.0960866	-0.813779	-0.223373	-2.61298
	-0.0691412	-0.808948	-0.241211	-2.65811
	-0.0572643	-0.803259	-0.242029	-2.69534
	-0.0593561	-0.815241	-0.229803	-2.72276
	-0.063165	-0.840977	-0.228074	-2.72748
	-0.05438	-0.857827	-0.233862	-2.708
	-0.0262365	-0.845232	-0.225086	-2.69548
	0.00258866	-0.809813	-0.199658	-2.70252
	0.00137679	-0.784007	-0.171337	-2.70605
	-0.0352545	-0.789654	-0.15207	-2.69618
	-0.077036	-0.818881	-0.150333	-2.68758
	-0.0976659	-0.847954	-0.167541	-2.68493
	-0.101065	-0.856703	-0.185366	-2.68544
	-0.103148	-0.843142	-0.186649	-2.69458
	-0.108679	-0.822581	-0.184098	-2.7085
	-0.113992	-0.809037	-0.196755	-2.70797
	-0.115068	-0.796427	-0.223033	-2.69398
	-0.11385	-0.776103	-0.247907	-2.689
	-0.118475	-0.757923	-0.265834	-2.69416
	-0.134053	-0.763198	-0.277461	-2.69317
	-0.147356	-0.800085	-0.282115	-2.69912
	-0.138073	-0.852357	-0.287465	-2.72112
	-0.106136	-0.885942	-0.29365	-2.72715
	-0.0724496	-0.88001	-0.281665	-2.69464
	-0.0572279	-0.845154	-0.24636	-2.63596
	-0.0608223	-0.818203	-0.215669	-2.55867
	-0.071768	-0.817979	-0.206136	-2.47856
	-0.0759234	-0.825987	-0.210561	-2.44098
	-0.0730168	-0.816839	-0.225483	-2.45395
	-0.078923	-0.794675	-0.245677	-2.47739
	-0.104637	-0.785623	-0.255727	-2.50189
	-0.131222	-0.81112	-0.257492	-2.54458
	-0.139714	-0.86067	-0.267813	-2.59266
	-0.135696	-0.897526	-0.279121	-2.62713
	-0.13391	-0.894972	-0.278173	-2.65748
	-0.13719	-0.86162	-0.274917	-2.67649
	-0.138496	-0.828446	-0.275543	-2.65867
	-0.126374	-0.814327	-0.274166	-2.62453
	-0.102018	-0.809299	-0.27512	-2.6072
	-0.0921086	-0.79223	-0.28156	-2.58399
	-0.114661	-0.767219	-0.277322	-2.52913
	-0.14735	-0.763315	-0.262404	-2.46598
	-0.159078	-0.79406	-0.259492	-2.4069
	-0.147009	-0.839446	-0.268354	-2.34965
	-0.135125	-0.867146	-0.269942	-2.32338
	-0.148333	-0.860145	-0.265868	-2.33228
	-0.18614	-0.834082	-0.261389	-2.32641
	-0.21764	-0.816913	-0.248878	-2.29384
	-0.215189	-0.817447	-0.238364	-2.27364
	-0.194371	-0.821626	-0.244095	-2.27543
	-0.194214	-0.817274	-0.250607	-2.28662
	-0.222954	-0.80878	-0.243034	-2.31392
	-0.247802	-0.812864	-0.238475	-2.3431
	-0.243854	-0.832735	-0.245831	-2.34219
	-0.213892	-0.854368	-0.253723	-2.31848
	-0.183337	-0.860652	-0.263638	-2.30379
	-0.18223	-0.852086	-0.278369	-2.29473
	-0.214331	-0.841966	-0.283794	-2.2769
	-0.244075	-0.843298	-0.276052	-2.26704
	-0.240877	-0.85664	-0.269606	-2.2717
	-0.214041	-0.868357	-0.265862	-2.27366
	-0.189958	-0.867327	-0.253476	-2.27612
	-0.177232	-0.859192	-0.237221	-2.29554
	-0.167931	-0.858474	-0.234716	-2.32093
	-0.144211	-0.869266	-0.250714	-2.33738
	-0.0988287	-0.877473	-0.273951	-2.35072
	-0.0564778	-0.870893	-0.302201	-2.35238
	-0.0582085	-0.855286	-0.324308	-2.32167
	-0.106323	-0.841834	-0.32979	-2.26761
	-0.151996	-0.836911	-0.324287	-2.21817
	-0.148916	-0.83945	-0.32348	-2.18158
	-0.107098	-0.838912	-0.32806	-2.1555
	-0.0743366	-0.829021	-0.328404	-2.14866
	-0.0816546	-0.823302	-0.328188	-2.15651
	-0.117377	-0.831641	-0.329772	-2.15768
	-0.145029	-0.844997	-0.324748	-2.15131
	-0.14743	-0.846331	-0.311096	-2.1589
	-0.141931	-0.832498	-0.301737	-2.17585
	-0.15627	-0.812525	-0.299671	-2.18573
	-0.18582	-0.804795	-0.296323	-2.20665
	-0.198298	-0.818971	-0.295954	-2.25208
	-0.176619	-0.844391	-0.305186	-2.30342
	-0.145621	-0.860714	-0.315014	-2.35953
	-0.139988	-0.858671	-0.320242	-2.42617
	-0.166851	-0.847942	-0.333091	-2.47177
	-0.1977	-0.849734	-0.344921	-2.47314
	-0.19454	-0.870611	-0.342219	-2.45834
	-0.14928	-0.893964	-0.3371	-2.4419
	-0.102321	-0.897315	-0.339524	-2.40891
	-0.0936745	-0.875861	-0.341858	-2.37663
	-0.109414	-0.851185	-0.34627	-2.3654
	-0.105572	-0.846639	-0.361478	-2.35211
	-0.0682769	-0.862082	-0.37365	-2.32188
	-0.0250391	-0.878501	-0.375266	-2.30366
	-0.0205227	-0.880565	-0.382468	-2.30795
	-0.0669619	-0.872307	-0.391871	-2.31778
	-0.124122	-0.871057	-0.387646	-2.34033
	-0.142224	-0.879216	-0.376302	-2.3688
	-0.118417	-0.879857	-0.366878	-2.35589
	-0.0937198	-0.866703	-0.34857	-2.30123
	-0.103196	-0.85721	-0.323173	-2.2648
	-0.143035	-0.86498	-0.305459	-2.26775
	-0.17086	-0.887982	-0.286302	-2.28517
	-0.151108	-0.909514	-0.255455	-2.30855
	-0.0983073	-0.908899	-0.232453	-2.31975
	-0.0706024	-0.886137	-0.224794	-2.29355
	-0.102069	-0.868333	-0.214165	-2.25778
	-0.163381	-0.870489	-0.201787	-2.25924
	-0.201203	-0.881967	-0.201522	-2.28306
	-0.200098	-0.886109	-0.208122	-2.30334
	-0.185372	-0.879903	-0.223364	-2.33635
	-0.188781	-0.876374	-0.25928	-2.38461
	-0.211934	-0.886346	-0.298834	-2.41945
	-0.218597	-0.901347	-0.313627	-2.43099
	-0.179088	-0.901923	-0.311511	-2.43175
	-0.125596	-0.880392	-0.312571	-2.41727
	-0.11037	-0.847867	-0.315369	-2.3864
	-0.141222	-0.822156	-0.313873	-2.36256
	-0.178493	-0.817195	-0.30961	-2.34979
	-0.18535	-0.829803	-0.295997	-2.33403
	-0.167139	-0.842781	-0.267331	-2.33412
	-0.170295	-0.844076	-0.235419	-2.37361
	-0.228661	-0.838208	-0.214797	-2.43303
	-0.313995	-0.839313	-0.204523	-2.48392
	-0.358277	-0.852204	-0.20095	-2.52214
	-0.325532	-0.871376	-0.21323	-2.53749
	-0.25469	-0.887775	-0.238543	-2.51571
	-0.214367	-0.897376	-0.260955	-2.4702
	-0.227252	-0.906155	-0.274155	-2.42864
	-0.253625	-0.928037	-0.282398	-2.40117
	-0.248361	-0.953396	-0.286928	-2.39428
	-0.20168	-0.958624	-0.287229	-2.42589
	-0.149306	-0.937797	-0.293302	-2.49124
	-0.137758	-0.902739	-0.305531	-2.54688
	-0.169153	-0.865025	-0.302746	-2.56653
	-0.199529	-0.835441	-0.275577	-2.55472
	-0.198153	-0.820456	-0.243526	-2.50847
	-0.176222	-0.819639	-0.227132	-2.43786
	-0.162531	-0.835701	-0.228198	-2.3904
	-0.163682	-0.872164	-0.243724	-2.38437
	-0.160598	-0.915274	-0.26189	-2.3909
	-0.135238	-0.942299	-0.267195	-2.40155
	-0.101028	-0.941218	-0.270741	-2.41703
	-0.0948371	-0.918775	-0.295608	-2.41356
	-0.141813	-0.896777	-0.329411	-2.39273
	-0.219388	-0.891186	-0.344229	-2.39393
	-0.273234	-0.897743	-0.341034	-2.41575
	-0.273365	-0.902258	-0.325854	-2.42787
	-0.238274	-0.897676	-0.303619	-2.4406
	-0.203647	-0.889633	-0.291416	-2.46128
	-0.187803	-0.887519	-0.294757	-2.45887
	-0.181998	-0.891565	-0.290571	-2.431
	-0.161372	-0.89408	-0.268797	-2.4146
	-0.12534	-0.883644	-0.249743	-2.41462
	-0.0962766	-0.859882	-0.239669	-2.41061
	-0.0842809	-0.836707	-0.230993	-2.41093
	-0.0797632	-0.827989	-0.228084	-2.40397
	-0.0735318	-0.831609	-0.229696	-2.35296
	-0.0617788	-0.839699	-0.226281	-2.2807
	-0.0553632	-0.847376	-0.229495	-2.24666
	-0.0785848	-0.852827	-0.25305	-2.25347
	-0.139231	-0.863769	-0.275165	-2.27446
	-0.205929	-0.893171	-0.273403	-2.30623
	-0.235367	-0.934314	-0.260545	-2.32892
	-0.2121	-0.962096	-0.249382	-2.31558
	-0.157366	-0.960601	-0.238342	-2.28244
	-0.107463	-0.937386	-0.238025	-2.24891
	-0.0888319	-0.914911	-0.246338	-2.1987
	-0.0910604	-0.904864	-0.235377	-2.13549
	-0.086348	-0.894396	-0.203263	-2.09939
	-0.0742426	-0.874557	-0.179211	-2.10304
	-0.0902271	-0.857503	-0.170602	-2.12834
	-0.150757	-0.860107	-0.161199	-2.17098
	-0.229937	-0.880904	-0.148401	-2.21926
	-0.291334	-0.901124	-0.140543	-2.23536
	-0.309925	-0.903721	-0.142601	-2.19865
	-0.287169	-0.889791	-0.164404	-2.13006
	-0.25342	-0.878468	-0.211422	-2.05167
	-0.239122	-0.880164	-0.260992	-1.983
	-0.241843	-0.886346	-0.285193	-1.95964
	-0.241176	-0.884192	-0.282202	-1.99408
	-0.229865	-0.874629	-0.268106	-2.04689
	-0.222108	-0.867131	-0.250548	-2.08358
	-0.231132	-0.868738	-0.228031	-2.10174
	-0.252854	-0.875935	-0.207267	-2.09594
	-0.263798	-0.882381	-0.191494	-2.05749
	-0.243231	-0.882261	-0.181118	-2.00584
	-0.193518	-0.877287	-0.18641	-1.96519
	-0.149048	-0.878639	-0.208684	-1.9319
	-0.142698	-0.890833	-0.226388	-1.89615
	-0.16572	-0.904587	-0.220833	-1.87022
	-0.178608	-0.913161	-0.208791	-1.86056
	-0.170792	-0.914272	-0.21383	-1.85723
	-0.166728	-0.909487	-0.234449	-1.87049
	-0.191401	-0.908266	-0.258542	-1.9107
	-0.242884	-0.9166	-0.277538	-1.95358
	-0.293532	-0.922136	-0.283829	-1.99012
	-0.311066	-0.910547	-0.282715	-2.04655
	-0.289681	-0.887533	-0.29586	-2.11191
	-0.252304	-0.870171	-0.31753	-2.14762
	-0.220618	-0.86784	-0.318031	-2.15938
	-0.196706	-0.873191	-0.293615	-2.16224
	-0.174391	-0.873219	-0.269942	-2.14113
	-0.155474	-0.866168	-0.259568	-2.10731
	-0.144065	-0.864056	-0.262638	-2.09508
	-0.150223	-0.875277	-0.277238	-2.09205
	-0.179616	-0.895459	-0.278612	-2.07337
	-0.214206	-0.90796	-0.255326	-2.06722
	-0.223283	-0.903001	-0.239992	-2.09515
	-0.206858	-0.889764	-0.260583	-2.13623
	-0.196357	-0.882464	-0.303036	-2.17866
	-0.215014	-0.885324	-0.341343	-2.22015
	-0.256781	-0.889932	-0.360356	-2.2244
	-0.292062	-0.886636	-0.351419	-2.17535
	-0.291211	-0.879333	-0.331556	-2.12212
	-0.263099	-0.878678	-0.332432	-2.09519
	-0.241853	-0.887861	-0.34796	-2.07883
	-0.242255	-0.90095	-0.345026	-2.08137
	-0.247705	-0.909942	-0.323943	-2.11573
	-0.245568	-0.908242	-0.312565	-2.14971
	-0.235897	-0.902659	-0.32318	-2.16328
	-0.227617	-0.906019	-0.350234	-2.17042
	-0.234959	-0.915832	-0.373731	-2.15643
	-0.268286	-0.912508	-0.361651	-2.10102
	-0.30866	-0.8871	-0.314032	-2.04233
	-0.317137	-0.852244	-0.283553	-2.03011
	-0.279948	-0.833402	-0.298556	-2.07048
	-0.220739	-0.846005	-0.323766	-2.15265
	-0.177802	-0.875588	-0.324921	-2.25702
	-0.177627	-0.897177	-0.305659	-2.32878
	-0.211202	-0.89966	-0.282986	-2.32805
	-0.235104	-0.890953	-0.274521	-2.27725
	-0.225763	-0.887723	-0.289808	-2.21848
	-0.210256	-0.897494	-0.309286	-2.16456
	-0.219505	-0.909295	-0.302252	-2.12512
	-0.24128	-0.912088	-0.270811	-2.11794
	-0.246815	-0.908234	-0.247905	-2.13612
	-0.225572	-0.90433	-0.251532	-2.15875
	-0.193146	-0.901343	-0.270005	-2.18406
	-0.168327	-0.898326	-0.286429	-2.20295
	-0.155319	-0.892524	-0.292514	-2.18968
	-0.143471	-0.883878	-0.291029	-2.14972
	-0.127584	-0.879483	-0.295465	-2.12235
	-0.119916	-0.890531	-0.32172	-2.12576
	-0.144912	-0.917997	-0.356318	-2.14879
	-0.201305	-0.948772	-0.365702	-2.18661
	-0.25189	-0.96528	-0.351504	-2.23177
	-0.257434	-0.964145	-0.344372	-2.26147
	-0.217719	-0.952865	-0.357385	-2.26891
	-0.169819	-0.938999	-0.376356	-2.27581
	-0.158006	-0.92859	-0.388491	-2.28586
	-0.196857	-0.918065	-0.388882	-2.28321
	-0.250627	-0.899501	-0.383162	-2.27908
	-0.268694	-0.87743	-0.392576	-2.28285
	-0.242077	-0.864458	-0.424368	-2.26789
	-0.207621	-0.864755	-0.448958	-2.22878
	-0.197805	-0.871934	-0.445682	-2.19869
	-0.205366	-0.877327	-0.439502	-2.18425
	-0.198692	-0.880086	-0.45409	-2.17441
	-0.163439	-0.889696	-0.483584	-2.19532
	-0.118764	-0.914347	-0.512448	-2.25188
	-0.0982226	-0.946938	-0.519167	-2.30531
	-0.113236	-0.969858	-0.488017	-2.34486
	-0.137515	-0.969787	-0.445236	-2.38644
	-0.141806	-0.947696	-0.436286	-2.41635
	-0.133979	-0.921959	-0.453141	-2.42345
	-0.132925	-0.909431	-0.45572	-2.43422
	-0.139981	-0.908646	-0.431369	-2.45007
	-0.140536	-0.913013	-0.386385	-2.43843
	-0.122913	-0.921979	-0.338712	-2.40669
	-0.0882039	-0.941066	-0.318517	-2.38464
	-0.0627349	-0.970556	-0.330225	-2.36097
	-0.0716659	-0.998434	-0.338051	-2.32608
	-0.110229	-1.00496	-0.328091	-2.30799
	-0.152457	-0.980237	-0.328507	-2.30705
	-0.17593	-0.937114	-0.351291	-2.29736
	-0.174358	-0.905759	-0.377097	-2.29917
	-0.166554	-0.904324	-0.392516	-2.33692
	-0.184476	-0.923205	-0.387197	-2.38587
	-0.229706	-0.943397	-0.356243	-2.42748
	-0.261822	-0.958047	-0.328121	-2.47035
	-0.247367	-0.972469	-0.334303	-2.49568
	-0.206872	-0.990214	-0.357662	-2.48434
	-0.187982	-1.0061	-0.365783	-2.46191
	-0.215066	-1.00623	-0.363202	-2.45178
	-0.270159	-0.983071	-0.366065	-2.44881
	-0.303805	-0.947374	-0.375694	-2.45861
	-0.28334	-0.917605	-0.393868	-2.48921
	-0.238494	-0.908561	-0.412503	-2.51424
	-0.221657	-0.920004	-0.406671	-2.50816
	-0.239502	-0.934418	-0.373552	-2.48952
	-0.250376	-0.94366	-0.344528	-2.47908
	-0.225546	-0.955292	-0.340345	-2.46602
	-0.175503	-0.973809	-0.347575	-2.44205
	-0.139064	-0.989549	-0.339787	-2.41717
	-0.144901	-0.987948	-0.313953	-2.38739
	-0.181435	-0.957555	-0.288973	-2.34265
	-0.207228	-0.907332	-0.283058	-2.29682
	-0.203819	-0.869978	-0.302586	-2.2637
	-0.197337	-0.871989	-0.329082	-2.24165
	-0.221348	-0.906431	-0.334312	-2.23824
	-0.266371	-0.946968	-0.311497	-2.26504
	-0.2875	-0.974099	-0.286595	-2.30449
	-0.26114	-0.983637	-0.276712	-2.33443
	-0.210876	-0.983009	-0.27132	-2.36487
	-0.181505	-0.981003	-0.263345	-2.40812
	-0.198687	-0.979473	-0.256013	-2.44131
	-0.240754	-0.973268	-0.250944	-2.44491
	-0.255906	-0.960171	-0.254605	-2.43237
	-0.220417	-0.948178	-0.275088	-2.41469
	-0.167735	-0.941199	-0.295013	-2.39757
	-0.147779	-0.93333	-0.287245	-2.40982
	-0.171006	-0.921505	-0.259734	-2.44832
	-0.2029	-0.908401	-0.244381	-2.4593
	-0.19955	-0.901378	-0.251451	-2.42593
	-0.154557	-0.908659	-0.267522	-2.38096
	-0.107803	-0.927282	-0.279275	-2.3326
	-0.107415	-0.941715	-0.272382	-2.27863
	-0.150371	-0.941686	-0.254668	-2.24661
	-0.188859	-0.929454	-0.262388	-2.23744
	-0.185024	-0.91696	-0.301352	-2.22124
	-0.154282	-0.917343	-0.331049	-2.20897
	-0.138961	-0.931752	-0.326709	-2.22538
	-0.165686	-0.94401	-0.306869	-2.2572
	-0.216386	-0.945403	-0.290768	-2.29829
	-0.244088	-0.944428	-0.290224	-2.36986
	-0.230233	-0.950485	-0.311271	-2.45669
	-0.201372	-0.965264	-0.330344	-2.5165
	-0.186229	-0.980087	-0.326908	-2.55354
	-0.183303	-0.979621	-0.325104	-2.58184
	-0.174668	-0.959712	-0.346578	-2.57177
	-0.150029	-0.934513	-0.368918	-2.51017
	-0.123628	-0.922134	-0.366222	-2.44088
	-0.129795	-0.924757	-0.338033	-2.39386
	-0.182803	-0.932434	-0.294087	-2.3733
	-0.250474	-0.940879	-0.259082	-2.39065
	-0.28555	-0.953709	-0.26641	-2.42043
	-0.277378	-0.969618	-0.304468	-2.40359
	-0.255378	-0.981293	-0.323572	-2.33774
	-0.254974	-0.978822	-0.31317	-2.2722
	-0.289599	-0.958329	-0.302401	-2.22348
	-0.331607	-0.933056	-0.305235	-2.18586
	-0.336523	-0.924585	-0.316954	-2.17595
	-0.292456	-0.940078	-0.332055	-2.19417
	-0.245306	-0.965039	-0.334603	-2.22271
	-0.235731	-0.983491	-0.314981	-2.27016
	-0.253223	-0.989214	-0.297292	-2.35248
	-0.2634	-0.991383	-0.302693	-2.44538
	-0.25109	-1.00061	-0.314081	-2.51141
	-0.231786	-1.01162	-0.310164	-2.54359
	-0.235533	-1.01285	-0.2969	-2.54328
	-0.269184	-1.00075	-0.288311	-2.5111
	-0.300536	-0.976817	-0.293283	-2.4686
	-0.293542	-0.950225	-0.310399	-2.44363
	-0.251581	-0.935266	-0.329543	-2.4306
	-0.212886	-0.93559	-0.338023	-2.41469
	-0.209235	-0.941861	-0.334311	-2.40561
	-0.236669	-0.948047	-0.333542	-2.409
	-0.263749	-0.955407	-0.342073	-2.41188
	-0.260186	-0.966645	-0.349126	-2.41409
	-0.224571	-0.981935	-0.34545	-2.42489
	-0.194819	-0.997385	-0.333826	-2.43319
	-0.211914	-1.00348	-0.317172	-2.4263
	-0.26367	-0.996106	-0.298914	-2.42356
	-0.292771	-0.984643	-0.295528	-2.43648
	-0.267282	-0.982602	-0.309186	-2.45017
	-0.213117	-0.98976	-0.313822	-2.46746
	-0.187021	-0.991599	-0.294026	-2.5077
	-0.217438	-0.981325	-0.270084	-2.55334
	-0.272927	-0.962795	-0.262054	-2.57489
	-0.293626	-0.942422	-0.263554	-2.58558
	-0.261594	-0.929092	-0.263425	-2.59973
	-0.221897	-0.928497	-0.256654	-2.60564
	-0.229657	-0.935827	-0.246171	-2.61113
	-0.276206	-0.946712	-0.246164	-2.62614
	-0.300941	-0.960531	-0.26419	-2.62371
	-0.267545	-0.974318	-0.271519	-2.59646
	-0.205351	-0.984887	-0.244577	-2.58266
	-0.176961	-0.990467	-0.207403	-2.59082
	-0.208878	-0.990199	-0.187163	-2.59183
	-0.258717	-0.98704	-0.185472	-2.58905
	-0.265535	-0.984786	-0.197366	-2.59078
	-0.227525	-0.981567	-0.209462	-2.572
	-0.199972	-0.974348	-0.199871	-2.52566
	-0.221255	-0.967506	-0.177961	-2.48002
	-0.276458	-0.965371	-0.176175	-2.43831
	-0.311416	-0.972258	-0.190123	-2.39349
	-0.285007	-0.987507	-0.194091	-2.3741
	-0.225242	-0.999828	-0.187037	-2.39037
	-0.201832	-0.997045	-0.173367	-2.40725
	-0.238472	-0.980672	-0.151816	-2.41941
	-0.283573	-0.963091	-0.139493	-2.44995
	-0.279919	-0.955489	-0.148902	-2.47907
	-0.226347	-0.958889	-0.159514	-2.47477
	-0.177875	-0.968253	-0.152137	-2.45386
	-0.185195	-0.978486	-0.138707	-2.43332
	-0.24501	-0.983947	-0.132935	-2.40801
	-0.295772	-0.988027	-0.13366	-2.38841
	-0.284971	-0.997373	-0.147126	-2.38206
	-0.233042	-1.01087	-0.17314	-2.36353
	-0.208303	-1.01926	-0.193105	-2.32415
	-0.242798	-1.01643	-0.202483	-2.2949
	-0.302852	-1.00386	-0.216613	-2.27892
	-0.331687	-0.989313	-0.229803	-2.25033
	-0.302326	-0.982254	-0.219033	-2.20575
	-0.247841	-0.985396	-0.184857	-2.16146
	-0.235259	-0.992689	-0.150763	-2.11828
	-0.28416	-0.997729	-0.134825	-2.08118
	-0.338644	-0.996426	-0.14656	-2.07426
	-0.342829	-0.993801	-0.181504	-2.10017
	-0.310734	-0.995866	-0.210014	-2.13479
	-0.300825	-0.995827	-0.206003	-2.16587
	-0.340275	-0.985556	-0.177749	-2.19013
	-0.393294	-0.972113	-0.15439	-2.19726
	-0.40417	-0.966763	-0.146728	-2.19311
	-0.36238	-0.976279	-0.139744	-2.20829
	-0.320666	-0.999133	-0.128655	-2.24344
	-0.342808	-1.0237	-0.121378	-2.2614
	-0.420273	-1.03651	-0.121668	-2.24391
	-0.473028	-1.03251	-0.133953	-2.2061
	-0.44254	-1.01855	-0.158981	-2.1612
	-0.361064	-1.00252	-0.176966	-2.12395
	-0.304787	-0.988297	-0.169929	-2.11969
	-0.313895	-0.97692	-0.15682	-2.1454
	-0.357675	-0.968978	-0.160765	-2.17167
	-0.368673	-0.963459	-0.176554	-2.1984
	-0.318392	-0.960101	-0.192837	-2.23778
	-0.255707	-0.962859	-0.206394	-2.26223
	-0.248186	-0.971516	-0.206851	-2.25261
	-0.300512	-0.97761	-0.194314	-2.23648
	-0.348475	-0.97765	-0.191753	-2.22492
	-0.332582	-0.975612	-0.205386	-2.20179
	-0.2656	-0.973953	-0.218119	-2.18766
	-0.216886	-0.971666	-0.224091	-2.20188
	-0.233048	-0.968502	-0.228539	-2.2165
	-0.28648	-0.969133	-0.223993	-2.21191
	-0.304665	-0.983318	-0.209347	-2.20031
	-0.262171	-1.00823	-0.201036	-2.17029
	-0.214972	-1.03053	-0.193575	-2.11178
	-0.219364	-1.04047	-0.177612	-2.06721
	-0.25903	-1.03817	-0.171845	-2.06305
	-0.271225	-1.02998	-0.186218	-2.07017
	-0.224368	-1.02319	-0.20288	-2.07479
	-0.153717	-1.01723	-0.214791	-2.08409
	-0.13365	-1.00575	-0.228447	-2.07538
	-0.188673	-0.992871	-0.236033	-2.03669
	-0.256159	-0.990238	-0.237713	-2.01268
	-0.258972	-1.00005	-0.249448	-2.02722
	-0.198004	-1.01384	-0.259823	-2.05584
	-0.140239	-1.02128	-0.241334	-2.09239
	-0.1447	-1.01666	-0.202194	-2.1387
	-0.204768	-1.0044	-0.166207	-2.16099
	-0.254513	-0.993914	-0.139915	-2.13955
	-0.23903	-0.991314	-0.12693	-2.10683
	-0.177024	-0.996036	-0.132065	-2.08163
	-0.138748	-1.00199	-0.139432	-2.05988
	-0.157833	-1.00746	-0.132612	-2.0538
	-0.192248	-1.01801	-0.124062	-2.06622
	-0.191105	-1.03696	-0.125338	-2.06744
	-0.156283	-1.06193	-0.123029	-2.05249
	-0.135118	-1.08211	-0.111621	-2.05318
	-0.173761	-1.08756	-0.10346	-2.07592
	-0.260326	-1.07347	-0.0997114	-2.09895
	-0.313475	-1.04473	-0.0960724	-2.12308
	-0.270328	-1.01365	-0.0984025	-2.16067
	-0.173888	-0.993877	-0.110062	-2.20293
	-0.116458	-0.98846	-0.12223	-2.23864
	-0.135206	-0.990592	-0.129916	-2.27315
	-0.187279	-0.997004	-0.142823	-2.30108
	-0.205388	-1.00932	-0.164699	-2.31112
	-0.166004	-1.02507	-0.188526	-2.31465
	-0.116327	-1.04239	-0.20911	-2.32385
	-0.118567	-1.06308	-0.226011	-2.32721
	-0.180406	-1.08114	-0.239353	-2.32072
	-0.241349	-1.08547	-0.244326	-2.32475
	-0.241618	-1.07111	-0.242693	-2.34379
	-0.194324	-1.0424	-0.23035	-2.35771
	-0.159726	-1.01165	-0.200649	-2.36247
	-0.164952	-0.990003	-0.168041	-2.36406
	-0.181968	-0.982308	-0.155856	-2.3539
	-0.171016	-0.989519	-0.162959	-2.33765
	-0.127204	-1.00961	-0.17309	-2.34109
	-0.0909596	-1.03594	-0.18336	-2.35738
	-0.107815	-1.05682	-0.190031	-2.35282
	-0.169515	-1.06575	-0.186125	-2.33687
	-0.218871	-1.06495	-0.183389	-2.33904
	-0.214616	-1.06105	-0.194521	-2.35746
	-0.175693	-1.05418	-0.203039	-2.38822
	-0.153351	-1.04042	-0.193642	-2.43779
	-0.174044	-1.02301	-0.182742	-2.47828
	-0.215327	-1.01553	-0.180158	-2.48222
	-0.236753	-1.02677	-0.180722	-2.47803
	-0.225993	-1.05203	-0.185949	-2.49125
	-0.210549	-1.07529	-0.19488	-2.50063
	-0.224719	-1.08357	-0.194557	-2.50057
	-0.25888	-1.07628	-0.18868	-2.51098
	-0.276544	-1.05776	-0.196406	-2.52408
	-0.262705	-1.03412	-0.205426	-2.52682
	-0.233725	-1.01347	-0.197596	-2.54242
	-0.216044	-0.998401	-0.185571	-2.57219
	-0.225845	-0.99163	-0.178833	-2.58332
	-0.245315	-1.00135	-0.170778	-2.57923
	-0.240028	-1.03016	-0.171766	-2.58765
	-0.208843	-1.06563	-0.189519	-2.59953
	-0.185196	-1.09031	-0.203091	-2.5985
	-0.192245	-1.09299	-0.202432	-2.60026
	-0.219804	-1.07392	-0.202503	-2.5985
	-0.230305	-1.04641	-0.204097	-2.56845
	-0.191619	-1.02557	-0.199036	-2.52432
	-0.123039	-1.01481	-0.196092	-2.49157
	-0.0900127	-1.0046	-0.196635	-2.46246
	-0.130149	-0.989565	-0.186021	-2.43716
	-0.206071	-0.974674	-0.170972	-2.4354
	-0.249392	-0.971868	-0.171353	-2.44713
	-0.237533	-0.981615	-0.184303	-2.44654
	-0.208395	-0.993435	-0.194726	-2.43945
	-0.210811	-0.99612	-0.203785	-2.4339
	-0.255839	-0.987131	-0.212212	-2.41626
	-0.295653	-0.976012	-0.207638	-2.38612
	-0.275307	-0.976325	-0.190815	-2.36696
	-0.206106	-0.990855	-0.175463	-2.36169
	-0.155697	-1.00748	-0.160323	-2.3572
	-0.158446	-1.0098	-0.140717	-2.35865
	-0.186858	-0.996351	-0.129496	-2.36797
	-0.197087	-0.981653	-0.137946	-2.36302
	-0.174457	-0.975041	-0.157864	-2.33308
	-0.146409	-0.970281	-0.171344	-2.29705
	-0.152425	-0.960215	-0.172541	-2.26574
	-0.19529	-0.947064	-0.163808	-2.23736
	-0.236489	-0.94161	-0.153518	-2.22412
	-0.240354	-0.957326	-0.158066	-2.23326
	-0.209343	-0.994371	-0.182394	-2.24036
	-0.180802	-1.02958	-0.208153	-2.22109
	-0.18416	-1.04064	-0.214912	-2.17605
	-0.208474	-1.03142	-0.210433	-2.11203
	-0.227816	-1.01699	-0.208006	-2.04052
	-0.230047	-1.00727	-0.200697	-1.99654
	-0.223685	-0.998791	-0.18631	-1.99558
	-0.23035	-0.981704	-0.17271	-2.00662
	-0.254049	-0.951421	-0.159672	-2.00797
	-0.265208	-0.917197	-0.151082	-2.01697
	-0.239492	-0.897946	-0.161907	-2.03151
	-0.192403	-0.907277	-0.182616	-2.0226
	-0.159027	-0.939854	-0.189162	-1.99314
	-0.160265	-0.977313	-0.184988	-1.96055
	-0.187535	-1.002	-0.186907	-1.91896
	-0.216068	-1.00723	-0.189685	-1.87815
	-0.225841	-0.997465	-0.181993	-1.8576
	-0.218282	-0.98066	-0.164262	-1.83707
	-0.205108	-0.959689	-0.129988	-1.79392
	-0.192522	-0.934846	-0.0849438	-1.75547
	-0.175463	-0.911142	-0.0596192	-1.73825
	-0.153429	-0.897018	-0.067051	-1.72231
	-0.139334	-0.895142	-0.0847873	-1.71026
	-0.148644	-0.900013	-0.0961456	-1.71509
	-0.187838	-0.899752	-0.102213	-1.70816
	-0.240395	-0.890496	-0.0973817	-1.66293
	-0.264364	-0.880871	-0.0848011	-1.60105
	-0.23702	-0.874079	-0.0827329	-1.53553
	-0.19066	-0.866446	-0.0812392	-1.45838
	-0.156893	-0.858117	-0.0588076	-1.39104
	-0.163566	-0.854093	-0.0314753	-1.35915
	-0.203557	-0.858956	-0.025192	-1.34317
	-0.247027	-0.877267	-0.0368404	-1.32477
	-0.267974	-0.902228	-0.05965	-1.31717
	-0.27579	-0.917101	-0.0884751	-1.31555
	-0.290424	-0.90911	-0.101591	-1.30419
	-0.305453	-0.885285	-0.0904742	-1.30442
	-0.299215	-0.865229	-0.0839666	-1.32533
	-0.268188	-0.863408	-0.0982567	-1.33166
	-0.226248	-0.874897	-0.113393	-1.3014
	-0.195355	-0.882286	-0.117879	-1.25487
	-0.193728	-0.87431	-0.11884	-1.21364
	-0.223219	-0.854919	-0.120837	-1.19472
	-0.2592	-0.836578	-0.126275	-1.21694
	-0.273896	-0.827454	-0.137504	-1.26619
	-0.26927	-0.818437	-0.138821	-1.29992
	-0.261392	-0.799335	-0.112914	-1.30069
	-0.25091	-0.775765	-0.0748541	-1.28796
	-0.240873	-0.767067	-0.0609442	-1.27033
	-0.243255	-0.785114	-0.0784667	-1.23727
	-0.259314	-0.815772	-0.105112	-1.19422
	-0.283509	-0.831038	-0.123489	-1.15216
	-0.307323	-0.818746	-0.128926	-1.10729
	-0.309721	-0.790751	-0.125891	-1.06823
	-0.279358	-0.768205	-0.124132	-1.05948
	-0.234635	-0.76673	-0.132533	-1.0795
	-0.204536	-0.777342	-0.139638	-1.10428
	-0.198764	-0.777637	-0.126518	-1.13224
	-0.208207	-0.762935	-0.105436	-1.16513
	-0.219114	-0.751512	-0.101096	-1.18883
	-0.225031	-0.75541	-0.114175	-1.20231
	-0.227405	-0.769862	-0.126985	-1.22206
	-0.229079	-0.780092	-0.133438	-1.23738
	-0.239441	-0.774019	-0.132027	-1.22624
	-0.260105	-0.75825	-0.1233	-1.20658
	-0.276408	-0.751898	-0.125108	-1.2028
	-0.271892	-0.758893	-0.144872	-1.20198
	-0.245997	-0.762702	-0.158046	-1.19566
	-0.215809	-0.744051	-0.149408	-1.19501
	-0.211061	-0.705685	-0.137688	-1.19113
	-0.244842	-0.672908	-0.132334	-1.17645
	-0.291661	-0.667049	-0.127757	-1.18536
	-0.311862	-0.685315	-0.125071	-1.23098
	-0.291571	-0.709758	-0.119497	-1.27691
	-0.2491	-0.723907	-0.100631	-1.30929
	-0.212561	-0.728488	-0.0803002	-1.33964
	-0.197258	-0.736164	-0.0788012	-1.35323
	-0.2008	-0.750001	-0.0834792	-1.34128
	-0.210111	-0.755073	-0.0760513	-1.33321
	-0.216095	-0.735758	-0.0644587	-1.33357
	-0.223467	-0.69842	-0.0549443	-1.322
	-0.24331	-0.66839	-0.0496433	-1.31481
	-0.270588	-0.665187	-0.0593212	-1.33333
	-0.293785	-0.679973	-0.0811045	-1.3494
	-0.311048	-0.692054	-0.0871606	-1.34
	-0.323075	-0.695347	-0.0720755	-1.31983
	-0.335308	-0.699541	-0.0611093	-1.28738
	-0.350349	-0.714793	-0.0605587	-1.22686
	-0.349127	-0.739124	-0.0561835	-1.16088
	-0.312687	-0.750791	-0.0461357	-1.11121
	-0.260685	-0.731755	-0.0285926	-1.06713
	-0.224019	-0.691264	0.0017613	-1.03288
	-0.212854	-0.658838	0.0252756	-1.03294
	-0.2207	-0.657316	0.023764	-1.04625
	-0.231961	-0.68195	0.0136765	-1.03202
	-0.235083	-0.701508	0.0128317	-0.989899
	-0.242333	-0.694564	0.00815613	-0.93152
	-0.276282	-0.67369	-0.00894556	-0.859453
	-0.325483	-0.667827	-0.0261534	-0.795707
	-0.342185	-0.683181	-0.0346641	-0.766089
	-0.304387	-0.70085	-0.0304495	-0.758966
	-0.242295	-0.699818	-0.00847875	-0.758598
	-0.194488	-0.678928	0.0178488	-0.781336
	-0.167146	-0.658822	0.0220785	-0.835393
	-0.151815	-0.655753	0.00171488	-0.895253
	-0.140091	-0.664976	-0.0165973	-0.936737
	-0.127527	-0.669336	-0.0140314	-0.950771
	-0.128135	-0.661099	0.000437732	-0.923846
	-0.158631	-0.64877	0.0105796	-0.850102
	-0.20564	-0.64571	0.00704031	-0.756991
	-0.239569	-0.654821	-0.0140167	-0.674053
	-0.246996	-0.667098	-0.0366298	-0.613077
	-0.228358	-0.667208	-0.0370082	-0.591461
	-0.195541	-0.65209	-0.0161726	-0.628977
	-0.165424	-0.637862	-0.00251597	-0.703381
	-0.14612	-0.635925	-0.00936446	-0.769996
	-0.132658	-0.636211	-0.0183979	-0.810385
	-0.124932	-0.625255	-0.0201098	-0.818899
	-0.130245	-0.601086	-0.0227745	-0.786619
	-0.147021	-0.574941	-0.033636	-0.734429
	-0.154643	-0.561516	-0.0585878	-0.701003
	-0.134995	-0.568689	-0.098811	-0.689896
	-0.101056	-0.586963	-0.128188	-0.686774
	-0.0801121	-0.603032	-0.118042	-0.70303
	-0.0854533	-0.612971	-0.0849594	-0.735829
	-0.113244	-0.619168	-0.0647487	-0.755251
	-0.142969	-0.622055	-0.0633074	-0.760975
	-0.150205	-0.616033	-0.0686933	-0.768065
	-0.132065	-0.594715	-0.0703881	-0.756128
	-0.109293	-0.562644	-0.0531487	-0.717169
	-0.102011	-0.533553	-0.0237292	-0.701168
	-0.115956	-0.521114	-0.0154117	-0.735699
	-0.136815	-0.531203	-0.0294628	-0.79536
	-0.142477	-0.553865	-0.033943	-0.863322
	-0.123546	-0.57404	-0.0181243	-0.926839
	-0.0911968	-0.585428	-5.38966e-05	-0.954458
	-0.069023	-0.593493	0.00960528	-0.951458
	-0.0669498	-0.602439	0.00335376	-0.95859
	-0.0730523	-0.60633	-0.0224925	-0.971891
	-0.071397	-0.598219	-0.0447409	-0.955934
	-0.0617492	-0.584773	-0.0468897	-0.922345
	-0.0525176	-0.576951	-0.0520227	-0.894404
	-0.0562997	-0.577038	-0.0797608	-0.868649
	-0.0760468	-0.578732	-0.113653	-0.854693
	-0.0963145	-0.573915	-0.135476	-0.870079
	-0.10972	-0.556805	-0.140917	-0.885772
	-0.12927	-0.536574	-0.125274	-0.869654
	-0.157297	-0.529724	-0.101607	-0.845215
	-0.179058	-0.538101	-0.102426	-0.833874
	-0.185738	-0.546416	-0.122672	-0.820717
	-0.175164	-0.542149	-0.123875	-0.806659
	-0.15171	-0.522947	-0.10039	-0.80645
	-0.133635	-0.501851	-0.0772341	-0.801108
	-0.129523	-0.495124	-0.0644256	-0.77295
	-0.126344	-0.507361	-0.0581839	-0.740601
	-0.108297	-0.533088	-0.0489823	-0.709427
	-0.0782886	-0.557379	-0.0199841	-0.666924
	-0.0483704	-0.565748	0.0264616	-0.63096
	-0.0267296	-0.560737	0.053515	-0.629585
	-0.0196136	-0.555578	0.0395581	-0.657071
	-0.0261093	-0.548945	0.00959013	-0.696903
	-0.0332243	-0.528511	-0.00391288	-0.744382
	-0.0302169	-0.49411	4.83211e-05	-0.773882
	-0.03087	-0.459461	0.00344365	-0.757805
	-0.0513527	-0.436948	-0.0103295	-0.711062
	-0.0872719	-0.429489	-0.0452729	-0.670788
	-0.123636	-0.431909	-0.0868718	-0.64358
	-0.146621	-0.440762	-0.105703	-0.618802
	-0.145528	-0.453068	-0.0893747	-0.597379
	-0.129415	-0.466349	-0.0665847	-0.570223
	-0.120629	-0.477224	-0.0653905	-0.521895
	-0.124219	-0.478751	-0.081268	-0.472503
	-0.123922	-0.465537	-0.0967845	-0.456309
	-0.106606	-0.446376	-0.10529	-0.472401
	-0.0802798	-0.429937	-0.104004	-0.502366
	-0.0675483	-0.421721	-0.0922548	-0.541347
	-0.0791797	-0.427435	-0.0825877	-0.572039
	-0.10162	-0.443987	-0.0780596	-0.565137
	-0.11059	-0.456385	-0.0641943	-0.52905
	-0.0969772	-0.454349	-0.0431425	-0.494127
	-0.0770544	-0.443454	-0.0370975	-0.465192
	-0.0814543	-0.437106	-0.0483827	-0.444931
	-0.114107	-0.442427	-0.058491	-0.45627
	-0.143631	-0.454162	-0.0605733	-0.490241
	-0.14797	-0.460277	-0.0530174	-0.504761
	-0.131565	-0.451221	-0.0376804	-0.496437
	-0.108262	-0.425964	-0.0339229	-0.494036
	-0.0897541	-0.394268	-0.0554736	-0.499354
	-0.0817348	-0.372166	-0.0759402	-0.511062
	-0.0788813	-0.368375	-0.0727149	-0.538604
	-0.0778064	-0.381809	-0.0629882	-0.557253
	-0.0795424	-0.404634	-0.0620345	-0.534145
	-0.087984	-0.42292	-0.0684895	-0.498088
	-0.104381	-0.425646	-0.081065	-0.4811
	-0.124439	-0.414545	-0.090556	-0.467231
	-0.140956	-0.397978	-0.0826051	-0.445959
	-0.150061	-0.385511	-0.0711961	-0.432029
	-0.160088	-0.377631	-0.0824932	-0.421156
	-0.182619	-0.369873	-0.104889	-0.410033
	-0.211163	-0.361191	-0.103785	-0.432024
	-0.221375	-0.356146	-0.0849398	-0.490716
	-0.204198	-0.358555	-0.0588286	-0.540617
	-0.17697	-0.370792	-0.036554	-0.562413
	-0.161828	-0.387123	-0.0392299	-0.565282
	-0.173866	-0.396976	-0.068779	-0.535582
	-0.200638	-0.398824	-0.088002	-0.474695
	-0.202466	-0.401973	-0.0733336	-0.432293
	-0.161706	-0.410023	-0.0472684	-0.429114
	-0.111265	-0.417456	-0.035143	-0.432857
	-0.0881649	-0.418834	-0.039686	-0.424123
	-0.0960446	-0.413386	-0.0617968	-0.407036
	-0.11838	-0.408102	-0.0877569	-0.381291
	-0.135411	-0.409785	-0.0921759	-0.354884
	-0.144444	-0.415141	-0.078772	-0.349578
	-0.165294	-0.418722	-0.0743102	-0.356199
	-0.205881	-0.416339	-0.078043	-0.354283
	-0.238046	-0.407941	-0.0665962	-0.353381
	-0.232736	-0.401754	-0.0388366	-0.370401
	-0.192881	-0.402429	-0.0163235	-0.394665
	-0.146586	-0.405789	-0.0129919	-0.415312
	-0.121294	-0.407811	-0.0298123	-0.440682
	-0.129448	-0.415879	-0.0593259	-0.466754
	-0.158948	-0.436388	-0.0806799	-0.475525
	-0.17756	-0.466422	-0.0827337	-0.470937
	-0.166724	-0.492821	-0.0823486	-0.468195
	-0.150577	-0.50515	-0.0988137	-0.46693
	-0.152625	-0.500426	-0.123338	-0.468244
	-0.15727	-0.483146	-0.135274	-0.489692
	-0.142293	-0.459524	-0.137317	-0.524582
	-0.113942	-0.433757	-0.140038	-0.537778
	-0.0927638	-0.405505	-0.144217	-0.515541
	-0.0952705	-0.378854	-0.152703	-0.469093
	-0.1179	-0.367588	-0.162178	-0.406177
	-0.139168	-0.377658	-0.154245	-0.346079
	-0.145439	-0.399804	-0.119114	-0.32872
	-0.142962	-0.422515	-0.0823102	-0.356383
	-0.152795	-0.435069	-0.0660233	-0.388532
	-0.183859	-0.43287	-0.0606832	-0.406435
	-0.21679	-0.421955	-0.0542727	-0.41371
	-0.226936	-0.40964	-0.051618	-0.401346
	-0.218877	-0.396527	-0.0572315	-0.382975
	-0.214622	-0.379665	-0.0762083	-0.395485
	-0.229125	-0.363173	-0.113129	-0.433112
	-0.252051	-0.358315	-0.144375	-0.457641
	-0.24897	-0.37308	-0.142785	-0.471971
	-0.204539	-0.402296	-0.12284	-0.490711
	-0.156261	-0.433955	-0.118232	-0.498663
	-0.15234	-0.455191	-0.131399	-0.49649
	-0.190092	-0.458178	-0.14739	-0.509105
	-0.226714	-0.443814	-0.157098	-0.525428
	-0.22785	-0.425003	-0.145329	-0.516746
	-0.199112	-0.41038	-0.117735	-0.495686
	-0.17839	-0.399968	-0.10962	-0.486408
	-0.193123	-0.391138	-0.129828	-0.49509
	-0.227763	-0.384379	-0.149108	-0.532583
	-0.239534	-0.382544	-0.152377	-0.593115
	-0.211483	-0.384676	-0.151265	-0.625259
	-0.166945	-0.382833	-0.149591	-0.5967
	-0.138488	-0.373998	-0.15105	-0.54731
	-0.137463	-0.362564	-0.164208	-0.514038
	-0.153504	-0.355598	-0.177455	-0.492261
	-0.163717	-0.356919	-0.173229	-0.494378
	-0.151696	-0.363135	-0.164956	-0.542176
	-0.135392	-0.366664	-0.170333	-0.620481
	-0.143541	-0.367755	-0.182063	-0.70564
	-0.169311	-0.373911	-0.192013	-0.796117
	-0.182616	-0.388376	-0.203062	-0.874229
	-0.173445	-0.404251	-0.205883	-0.917876
	-0.151427	-0.41151	-0.192694	-0.939354
	-0.13608	-0.406185	-0.184305	-0.958012
	-0.145528	-0.393408	-0.195286	-0.963354
	-0.165566	-0.385227	-0.206803	-0.951253
	-0.16289	-0.38736	-0.204582	-0.941473
	-0.138257	-0.398855	-0.197561	-0.935228
	-0.124776	-0.40824	-0.191443	-0.917474
	-0.138789	-0.406591	-0.185702	-0.901903
	-0.162848	-0.39938	-0.18362	-0.907606
	-0.174782	-0.398811	-0.182212	-0.920265
	-0.167336	-0.402123	-0.171081	-0.920491
	-0.150226	-0.395239	-0.155975	-0.912247
	-0.145057	-0.367941	-0.158854	-0.893721
	-0.163286	-0.329656	-0.180256	-0.855213
	-0.180922	-0.30132	-0.197682	-0.813417
	-0.166706	-0.294962	-0.204193	-0.791097
	-0.129963	-0.300775	-0.207249	-0.789219
	-0.108654	-0.300425	-0.208851	-0.806467
	-0.122545	-0.289992	-0.20273	-0.844605
	-0.157971	-0.286295	-0.19282	-0.873667
	-0.185268	-0.300482	-0.173463	-0.855492
	-0.182698	-0.318684	-0.135887	-0.79792
	-0.161148	-0.318959	-0.102628	-0.732233
	-0.149145	-0.298515	-0.102351	-0.668594
	-0.159173	-0.272116	-0.128106	-0.615626
	-0.178172	-0.25626	-0.152652	-0.597948
	-0.187907	-0.26033	-0.164136	-0.615173
	-0.188299	-0.277071	-0.158746	-0.640771
	-0.196935	-0.290937	-0.139831	-0.67697
	-0.219667	-0.295313	-0.128916	-0.72709
	-0.238905	-0.297114	-0.138054	-0.765606
	-0.232577	-0.301576	-0.148792	-0.787681
	-0.189683	-0.302415	-0.146372	-0.818208
	-0.125729	-0.285891	-0.141344	-0.849128
	-0.0830282	-0.252617	-0.136325	-0.85528
	-0.0870063	-0.219286	-0.129229	-0.850678
	-0.121405	-0.204687	-0.129571	-0.841756
	-0.154328	-0.212811	-0.132846	-0.808652
	-0.169961	-0.23165	-0.120943	-0.770992
	-0.171403	-0.245879	-0.099937	-0.76515
	-0.17368	-0.252351	-0.0934178	-0.773346
	-0.180945	-0.256305	-0.0958682	-0.765754
	-0.180102	-0.260808	-0.0952669	-0.757069
	-0.167625	-0.259736	-0.0982834	-0.756465
	-0.158552	-0.249754	-0.103938	-0.750703
	-0.16478	-0.235082	-0.104056	-0.750487
	-0.175943	-0.22738	-0.105108	-0.763927
	-0.17865	-0.23319	-0.105985	-0.758498
	-0.176984	-0.247726	-0.0918017	-0.716399
	-0.183731	-0.25828	-0.0703331	-0.673033
	-0.203568	-0.252134	-0.0689678	-0.646781
	-0.228954	-0.229064	-0.0875539	-0.628591
	-0.240746	-0.206754	-0.105231	-0.629714
	-0.224595	-0.20021	-0.1202	-0.653792
	-0.194448	-0.204633	-0.12866	-0.67061
	-0.173288	-0.210622	-0.122936	-0.672964
	-0.161751	-0.213281	-0.104897	-0.683886
	-0.150891	-0.216337	-0.087663	-0.695211
	-0.140345	-0.221646	-0.0714869	-0.684683
	-0.129278	-0.227874	-0.0557664	-0.666592
	-0.118133	-0.231102	-0.0565646	-0.657549
	-0.119933	-0.231166	-0.078016	-0.648308
	-0.1356	-0.229784	-0.0980868	-0.639567
	-0.148363	-0.227937	-0.103487	-0.650227
	-0.151983	-0.22475	-0.0977988	-0.677276
	-0.158572	-0.219119	-0.0823531	-0.704584
	-0.175122	-0.20861	-0.0602719	-0.735134
	-0.197925	-0.199208	-0.0461979	-0.767046
	-0.219803	-0.198298	-0.0456564	-0.779773
	-0.227435	-0.206432	-0.0497257	-0.769015
	-0.209944	-0.216806	-0.0536134	-0.758157
	-0.177512	-0.221564	-0.0684856	-0.754997
	-0.160163	-0.216172	-0.0943601	-0.749852
	-0.170246	-0.203565	-0.115532	-0.745702
	-0.19109	-0.190132	-0.127883	-0.74252
	-0.204952	-0.181964	-0.134119	-0.720068
	-0.212366	-0.178321	-0.12994	-0.676074
	-0.222958	-0.172406	-0.11475	-0.635695
	-0.243158	-0.165782	-0.106166	-0.609762
	-0.265345	-0.166209	-0.111424	-0.594867
	-0.271718	-0.176903	-0.118718	-0.605234
	-0.258971	-0.190499	-0.128847	-0.643629
	-0.243989	-0.197659	-0.145042	-0.68413
	-0.242273	-0.191161	-0.15386	-0.715137
	-0.2532	-0.174269	-0.151589	-0.747353
	-0.264366	-0.160081	-0.156306	-0.7669
	-0.269691	-0.158085	-0.168451	-0.757023
	-0.269989	-0.163546	-0.17205	-0.744166
	-0.261945	-0.172616	-0.170052	-0.748783
	-0.243601	-0.186507	-0.172544	-0.747198
	-0.224082	-0.207298	-0.175624	-0.727505
	-0.209475	-0.229908	-0.180079	-0.704349
	-0.203495	-0.246	-0.19443	-0.675205
	-0.214384	-0.249793	-0.204297	-0.646778
	-0.240826	-0.243478	-0.199217	-0.659568
	-0.270407	-0.23235	-0.19481	-0.714988
	-0.293337	-0.22399	-0.197927	-0.76583
	-0.309055	-0.219804	-0.200264	-0.795412
	-0.318072	-0.216579	-0.204702	-0.814758
	-0.323316	-0.210564	-0.214408	-0.818446
	-0.325548	-0.203745	-0.211668	-0.811598
	-0.319598	-0.202082	-0.197997	-0.827362
	-0.310972	-0.207212	-0.200141	-0.863432
	-0.313866	-0.216146	-0.22086	-0.892265
	-0.327807	-0.225815	-0.238864	-0.922867
	-0.334991	-0.235578	-0.243864	-0.965533
	-0.323053	-0.244442	-0.231161	-0.98787
	-0.298398	-0.254168	-0.200754	-0.976196
	-0.277203	-0.265363	-0.177898	-0.96346
	-0.274944	-0.27531	-0.185331	-0.957828
	-0.291479	-0.27924	-0.203966	-0.941473
	-0.304263	-0.283364	-0.204955	-0.924168
	-0.293037	-0.295534	-0.197164	-0.904147
	-0.269405	-0.312176	-0.198918	-0.852853
	-0.252734	-0.322462	-0.205901	-0.776535
	-0.239987	-0.322032	-0.214259	-0.714821
	-0.219687	-0.315716	-0.22354	-0.675938
	-0.189943	-0.316337	-0.226531	-0.647699
	-0.1532	-0.329309	-0.225328	-0.632688
	-0.121531	-0.348502	-0.238793	-0.616252
	-0.116775	-0.357927	-0.266681	-0.568852
	-0.13736	-0.349411	-0.284489	-0.492421
	-0.161038	-0.326597	-0.284503	-0.416563
	-0.181463	-0.300843	-0.282992	-0.353849
	-0.208359	-0.279123	-0.287212	-0.298758
	-0.241636	-0.262202	-0.294925	-0.249604
	-0.268589	-0.252638	-0.306341	-0.199419
	-0.275982	-0.255659	-0.311119	-0.132517
	-0.259363	-0.27124	-0.298723	-0.0520266
	-0.229465	-0.290848	-0.280149	0.0228584
	-0.209573	-0.30206	-0.277358	0.0911798
	-0.212307	-0.292453	-0.285825	0.157234
	-0.22117	-0.260418	-0.281544	0.195029
	-0.211042	-0.218576	-0.262048	0.190657
	-0.183178	-0.188156	-0.238063	0.173939
	-0.16539	-0.180809	-0.215418	0.175821
	-0.185031	-0.192125	-0.202261	0.194884
	-0.241798	-0.212243	-0.208737	0.225826
	-0.304922	-0.234063	-0.218614	0.271662
	-0.331287	-0.252804	-0.218635	0.327917
	-0.304875	-0.271267	-0.218037	0.399742
	-0.250765	-0.290515	-0.233211	0.492553
	-0.207376	-0.300984	-0.256431	0.567988
	-0.191703	-0.288822	-0.271987	0.575657
	-0.192866	-0.259244	-0.270188	0.525876
	-0.197002	-0.227963	-0.242179	0.461872
	-0.205306	-0.206927	-0.200093	0.39457
	-0.224339	-0.198802	-0.178453	0.334926
	-0.24639	-0.201929	-0.188315	0.307877
	-0.248166	-0.210194	-0.208815	0.296194
	-0.209606	-0.221835	-0.226042	0.271142
	-0.147044	-0.23532	-0.242661	0.252476
	-0.107904	-0.245827	-0.251347	0.263903
	-0.114368	-0.249264	-0.247719	0.290039
	-0.142795	-0.245351	-0.242342	0.327386
	-0.161196	-0.23651	-0.233294	0.382726
	-0.160716	-0.226238	-0.218439	0.426296
	-0.157517	-0.219896	-0.215818	0.434319
	-0.174945	-0.220436	-0.23508	0.427723
	-0.211462	-0.228112	-0.256199	0.415445
	-0.234184	-0.240781	-0.266302	0.376248
	-0.224694	-0.253717	-0.274618	0.320026
	-0.201817	-0.261481	-0.282668	0.280231
	-0.197979	-0.265867	-0.28975	0.257529
	-0.228139	-0.266783	-0.306093	0.251611
	-0.277133	-0.262102	-0.322868	0.278491
	-0.303896	-0.254201	-0.316011	0.322986
	-0.281075	-0.251636	-0.294047	0.342145
	-0.232223	-0.255841	-0.286533	0.330942
	-0.201723	-0.261676	-0.29943	0.303495
	-0.202124	-0.263669	-0.318016	0.244009
	-0.210789	-0.264564	-0.335481	0.155816
	-0.209949	-0.265712	-0.344783	0.0800018
	-0.201009	-0.268886	-0.342491	0.0389743
	-0.200827	-0.272024	-0.347977	0.0234382
	-0.230518	-0.27102	-0.373241	0.0272079
	-0.277504	-0.263051	-0.393391	0.0348873
	-0.289614	-0.251233	-0.388417	0.0146898
	-0.240421	-0.245245	-0.376312	-0.0287677
	-0.173787	-0.251944	-0.378586	-0.050401
	-0.148885	-0.269015	-0.392176	-0.0280194
	-0.17942	-0.288676	-0.404599	0.0201565
	-0.230558	-0.303053	-0.405169	0.0752687
	-0.249622	-0.307128	-0.383552	0.128619
	-0.21966	-0.302277	-0.347921	0.163898
	-0.178983	-0.294783	-0.332262	0.181696
	-0.173155	-0.290737	-0.341603	0.203157
	-0.1981	-0.289613	-0.346757	0.226394
	-0.210476	-0.289578	-0.328521	0.228851
	-0.183594	-0.2904	-0.300892	0.211741
	-0.140153	-0.292407	-0.287079	0.186405
	-0.120881	-0.293171	-0.29553	0.148825
	-0.136371	-0.293277	-0.324347	0.114576
	-0.159379	-0.293647	-0.353015	0.114833
	-0.156749	-0.296678	-0.359389	0.139455
	-0.128649	-0.301615	-0.35371	0.156792
	-0.114308	-0.309629	-0.363149	0.17031
	-0.146555	-0.314547	-0.385425	0.19853
	-0.20758	-0.30727	-0.395266	0.231648
	-0.247795	-0.288978	-0.385426	0.256164
	-0.236675	-0.273397	-0.364984	0.270378
	-0.18932	-0.271045	-0.34419	0.25829
	-0.14439	-0.281928	-0.338269	0.217439
	-0.126093	-0.296241	-0.350912	0.189605
	-0.129111	-0.303097	-0.355097	0.20268
	-0.13196	-0.300406	-0.335436	0.225814
	-0.124319	-0.298762	-0.319754	0.232733
	-0.12038	-0.309571	-0.332891	0.223308
	-0.136097	-0.328506	-0.37011	0.177519
	-0.154861	-0.341672	-0.412363	0.0949817
	-0.142385	-0.341521	-0.440839	0.0318844
	-0.0951754	-0.333796	-0.444105	0.0265585
	-0.0455934	-0.328747	-0.439371	0.067398
	-0.0319669	-0.329384	-0.454352	0.145668
	-0.0607244	-0.3288	-0.475152	0.245967
	-0.0915003	-0.322496	-0.473878	0.311179
	-0.0835226	-0.311896	-0.458063	0.31349
	-0.0528913	-0.304819	-0.450248	0.289154
	-0.0505818	-0.306637	-0.456074	0.272175
	-0.0919683	-0.316891	-0.474603	0.270347
	-0.144212	-0.324475	-0.49848	0.299205
	-0.159193	-0.320581	-0.507365	0.359592
	-0.122573	-0.308601	-0.500638	0.410296
	-0.0789114	-0.302116	-0.506899	0.430729
	-0.0855845	-0.306254	-0.530468	0.43412
	-0.137986	-0.317426	-0.541952	0.410944
	-0.171875	-0.324271	-0.531138	0.347983
	-0.144539	-0.318278	-0.51287	0.283998
	-0.0796825	-0.300578	-0.501615	0.263873
	-0.0331798	-0.280483	-0.510242	0.280857
	-0.034776	-0.265993	-0.538257	0.31769
	-0.0686189	-0.256909	-0.555005	0.363776
	-0.0896573	-0.253474	-0.533542	0.383522
	-0.0746035	-0.261958	-0.497664	0.355314
	-0.062689	-0.285857	-0.488913	0.308258
	-0.104193	-0.318616	-0.509065	0.269902
	-0.1824	-0.343743	-0.532174	0.231917
	-0.229403	-0.34458	-0.542195	0.192598
	-0.202738	-0.319427	-0.535684	0.163152
	-0.121848	-0.282435	-0.520124	0.138208
	-0.0519015	-0.254908	-0.514516	0.112546
	-0.0445134	-0.246031	-0.526747	0.106137
	-0.0766745	-0.247108	-0.534858	0.138383
	-0.0796915	-0.241131	-0.516739	0.199318
	-0.0337649	-0.225569	-0.485528	0.272235
	0.00834378	-0.210446	-0.461521	0.343434
	-0.00845188	-0.206803	-0.451997	0.380321
	-0.0735757	-0.211744	-0.460824	0.359253
	-0.119667	-0.217669	-0.481596	0.306323
	-0.0961372	-0.21595	-0.495165	0.262363
	-0.0250201	-0.205655	-0.494047	0.236272
	0.0232399	-0.192861	-0.496239	0.232206
	0.00112351	-0.181085	-0.505906	0.260004
	-0.0653649	-0.16598	-0.500161	0.299561
	-0.105128	-0.147264	-0.472642	0.325138
[truncated: 5,501 more rows]

## Sheet: day10
	-0.077599	0.0163998	-0.0637103	-0.237524
	-0.0320046	0.014156	-0.0476064	-0.241423
	0.00363753	0.0153248	-0.0372608	-0.23806
	0.0059403	0.0233425	-0.03437	-0.217008
	-0.00935977	0.031944	-0.0308466	-0.199438
	-0.0128245	0.0344559	-0.0212187	-0.198717
	0.003034	0.0326078	-0.0132454	-0.200249
	0.0128825	0.0305988	-0.0165072	-0.200874
	-0.0117913	0.0322719	-0.0317541	-0.207293
	-0.0580771	0.0375302	-0.0505748	-0.206386
	-0.0829285	0.0374903	-0.0645973	-0.186668
	-0.0557227	0.029603	-0.07095	-0.159198
	0.00460159	0.0282155	-0.0729531	-0.130993
	0.0396687	0.0427104	-0.0788811	-0.0992254
	0.0190478	0.0643217	-0.090545	-0.0795031
	-0.0287921	0.0756477	-0.0910842	-0.0888816
	-0.0613556	0.0712941	-0.0680004	-0.115437
	-0.0659145	0.056345	-0.039552	-0.138572
	-0.0518461	0.0387947	-0.0289376	-0.151585
	-0.0431899	0.0284068	-0.0368001	-0.15068
	-0.0534867	0.0243696	-0.0511667	-0.136742
	-0.0594823	0.0156309	-0.0628622	-0.125464
	-0.0347238	-0.000758163	-0.0607246	-0.133771
	0.00820248	-0.0152817	-0.0512042	-0.151236
	0.0339307	-0.0254707	-0.0535123	-0.153126
	0.0238459	-0.03208	-0.0650334	-0.138524
	-0.00490571	-0.0347866	-0.0676823	-0.120565
	-0.0177468	-0.0351971	-0.059682	-0.104496
	0.00147366	-0.0376782	-0.0500858	-0.098038
	0.027755	-0.0358492	-0.0369649	-0.104776
	0.0240553	-0.0195291	-0.0235793	-0.113062
	-0.00841153	0.008807	-0.0208669	-0.118551
	-0.0299904	0.0335828	-0.024489	-0.135617
	-0.0237691	0.0420057	-0.0215646	-0.165974
	-0.00730973	0.0324775	-0.0127236	-0.190085
	4.70848e-05	0.0130711	-0.00499713	-0.202716
	-0.0112203	-0.00849983	0.00450507	-0.205544
	-0.0370049	-0.026662	0.0132508	-0.192472
	-0.0488942	-0.0440925	0.0143926	-0.169317
	-0.0264079	-0.0663251	0.0115948	-0.151465
	0.00673974	-0.0874205	0.00811701	-0.130849
	0.0283366	-0.0970198	0.00168425	-0.0861089
	0.0395571	-0.0964032	-0.00603444	-0.0278252
	0.0436379	-0.0925361	-0.00587123	0.016685
	0.0481746	-0.0862113	0.00381745	0.0423293
	0.0587239	-0.0754365	0.023206	0.0484457
	0.0535761	-0.0606467	0.0469725	0.026761
	0.0151474	-0.0420595	0.0580763	-0.00725565
	-0.0283273	-0.0228578	0.0475556	-0.0328695
	-0.0385868	-0.0155335	0.025044	-0.0596418
	-0.0182737	-0.0257552	0.00111961	-0.0873654
	-0.00180107	-0.0448434	-0.020417	-0.0929997
	-0.0113498	-0.0583409	-0.0334919	-0.0783568
	-0.0338276	-0.0623079	-0.0333558	-0.0606088
	-0.0376602	-0.0610314	-0.021804	-0.0277351
	-0.00665517	-0.0608387	-0.00011838	0.0270795
	0.0341289	-0.0634366	0.0284316	0.0726328
	0.0414244	-0.0648854	0.0500599	0.0907778
	0.00204613	-0.0600875	0.0497476	0.088822
	-0.0483542	-0.0532598	0.0280224	0.0666852
	-0.0705735	-0.0500878	-0.00323819	0.0239612
	-0.0604075	-0.0462165	-0.0311538	-0.0214653
	-0.0413332	-0.0369302	-0.0495058	-0.056767
	-0.0413294	-0.0256093	-0.0589719	-0.0892712
	-0.064049	-0.0178769	-0.0626222	-0.115035
	-0.0821978	-0.0238102	-0.0583408	-0.115924
	-0.0671953	-0.0466556	-0.0364901	-0.0971753
	-0.0222726	-0.0721188	0.0037272	-0.0712092
	0.0211851	-0.0783124	0.044734	-0.0246861
	0.034705	-0.0633174	0.0578343	0.0455176
	0.0253357	-0.0433811	0.0340947	0.10219
	0.0236363	-0.0331016	-0.00439006	0.111478
	0.0354043	-0.0412891	-0.0290586	0.0725348
	0.0412624	-0.0607898	-0.0338369	0.00356764
	0.0223682	-0.0730614	-0.0275279	-0.0616479
	-0.0201885	-0.0684984	-0.0236961	-0.086689
	-0.0571552	-0.057528	-0.0324764	-0.0725534
	-0.0510588	-0.0520792	-0.0387638	-0.0496666
	-0.00531265	-0.0503775	-0.0161971	-0.0309038
	0.0336674	-0.0448611	0.0247723	-0.00377474
	0.0401153	-0.0350135	0.0449587	0.0442566
	0.0260735	-0.0226807	0.0309734	0.108312
	0.015219	-0.0140279	-0.00124785	0.173159
	0.0168541	-0.0194127	-0.0316902	0.220639
	0.0181785	-0.0382444	-0.0358082	0.233902
	-0.00169663	-0.0509321	-0.0094957	0.215957
	-0.0329554	-0.0432026	0.0144389	0.188326
	-0.038113	-0.0207036	0.0101719	0.156186
	-0.00155889	-0.00301962	-0.00382217	0.117678
	0.0455456	-0.00437139	-0.00289308	0.0886785
	0.0636747	-0.0228698	0.00819125	0.0797262
	0.0475622	-0.0392453	0.0138527	0.0780383
	0.0210822	-0.036233	0.00236987	0.0791027
	0.0163676	-0.0142285	-0.0260002	0.0895307
	0.0404699	0.0130745	-0.052586	0.102497
	0.056236	0.0286445	-0.0552127	0.114536
	0.034505	0.0295429	-0.0439305	0.134091
	0.00286854	0.0250295	-0.0428355	0.151488
	0.00177909	0.0199952	-0.0531479	0.144969
	0.0242143	0.0176056	-0.0583064	0.112844
	0.037122	0.023519	-0.045758	0.0708241
	0.0186256	0.0340801	-0.0175725	0.0282587
	-0.0280402	0.0435369	0.00605149	-0.00580302
	-0.0658256	0.0547339	0.00200368	-0.015992
	-0.0625314	0.0690793	-0.0216361	-0.0103639
	-0.0384871	0.0771938	-0.0325857	-0.013724
	-0.0380862	0.0752797	-0.0170149	-0.018259
	-0.0684911	0.0670806	0.0135733	-0.00273344
	-0.0978744	0.0545965	0.034194	0.0190883
	-0.0913502	0.0414305	0.0247346	0.0369431
	-0.0446204	0.0355394	-0.00537614	0.0615955
	0.0171329	0.0386619	-0.0219108	0.0805885
	0.0605061	0.0489321	-0.00934528	0.0754719
	0.0720096	0.0668428	0.0110272	0.0630991
	0.0726762	0.0901083	0.0149751	0.0531035
	0.0871197	0.106523	0.00255829	0.0252121
	0.103622	0.108062	-0.0074735	-0.0150326
	0.0928367	0.100584	0.000593839	-0.0365417
	0.0599379	0.0958521	0.0260841	-0.0304628
	0.0419554	0.0981956	0.0515709	-0.00130561
	0.0632225	0.104562	0.0591692	0.0433891
	0.110942	0.100441	0.0495106	0.0777046
	0.136468	0.0758914	0.0433077	0.0690706
	0.0991135	0.0473356	0.0541468	0.0222873
	0.0192902	0.0332749	0.0740682	-0.0212931
	-0.0314764	0.0333887	0.0841997	-0.0344685
	-0.0147281	0.0400545	0.0733562	-0.0180043
	0.0325068	0.0514795	0.0484012	0.0223006
	0.0485264	0.0633704	0.0280683	0.0678715
	0.0173855	0.0750422	0.0278988	0.0931541
	-0.0216027	0.0896262	0.0447236	0.106053
	-0.025931	0.0954742	0.0603161	0.130719
	0.0109989	0.0783542	0.0637367	0.159383
	0.0459856	0.0465831	0.0666563	0.170187
	0.0324836	0.0154598	0.0808302	0.166592
	-0.0172544	-0.0109885	0.0936962	0.161671
	-0.0478045	-0.0337224	0.0939877	0.16253
	-0.0398214	-0.0481441	0.0866161	0.173801
	-0.0246431	-0.0524359	0.0804278	0.190257
	-0.0289047	-0.0468878	0.0823852	0.197156
	-0.0492539	-0.0308602	0.0991618	0.192582
	-0.058473	-0.00626292	0.118409	0.189351
	-0.0296466	0.0131536	0.114432	0.19673
	0.0225626	0.0175339	0.089273	0.20665
	0.0496186	0.00940104	0.0648748	0.212138
	0.0320783	-0.00882208	0.0513349	0.221303
	0.00218543	-0.0330007	0.0442947	0.231394
	-0.00214606	-0.0502245	0.0406687	0.234702
	0.0264787	-0.0491345	0.0365621	0.239831
	0.0626697	-0.0318645	0.0319495	0.245246
	0.0695381	-0.00609962	0.0387018	0.233306
	0.0326168	0.0206006	0.0597557	0.205109
	-0.0146656	0.0383205	0.0767462	0.177026
	-0.0284866	0.0399079	0.0723015	0.150718
	-0.015033	0.0266384	0.0510399	0.134653
	-0.0081071	0.0078864	0.0296244	0.147204
	-0.0173085	-0.0041828	0.0215288	0.172561
	-0.0251775	-0.00972687	0.028184	0.177033
	-0.0124374	-0.0156334	0.0334823	0.157632
	0.0205933	-0.0247376	0.0228532	0.133249
	0.0372788	-0.0390257	0.00447977	0.113932
	0.00287564	-0.0571432	-0.00233827	0.103338
	-0.0558272	-0.0702035	0.00967746	0.0981304
	-0.0764459	-0.0736113	0.0339686	0.0837273
	-0.0406892	-0.0715161	0.0551582	0.0533036
	0.00845963	-0.0695139	0.0591794	0.0299016
	0.0167303	-0.0696998	0.0507312	0.0287294
	-0.0299697	-0.0752952	0.0444588	0.0280455
	-0.0936478	-0.0845916	0.0456731	0.0217109
	-0.119808	-0.094296	0.0459075	0.0321338
	-0.0900122	-0.108812	0.0368748	0.0524306
	-0.0331459	-0.136172	0.0177244	0.0584852
	0.00541561	-0.170025	-0.00221472	0.0536398
	0.0125694	-0.190875	-0.00845451	0.0444587
	0.0108036	-0.192695	0.00255464	0.0254049
	0.023916	-0.190758	0.0153309	0.0175202
	0.0411267	-0.197953	0.0140769	0.046829
	0.0288021	-0.208215	0.00686083	0.100111
	-0.0288572	-0.209683	0.0161483	0.155468
	-0.104046	-0.195998	0.0476408	0.204619
	-0.147666	-0.175609	0.0824415	0.229062
	-0.141368	-0.163198	0.1005	0.21345
	-0.117908	-0.156332	0.0959822	0.174582
	-0.124006	-0.148178	0.0763286	0.1444
	-0.154168	-0.140883	0.0577448	0.134704
	-0.156018	-0.135138	0.0532564	0.139164
	-0.103195	-0.128718	0.0571733	0.15415
	-0.0326103	-0.125829	0.0514893	0.171169
	0.000775547	-0.128678	0.0379024	0.179088
	-0.0279212	-0.125907	0.0343412	0.190001
	-0.0916008	-0.116126	0.0442725	0.226153
	-0.123755	-0.111531	0.0542558	0.277371
	-0.0892102	-0.12009	0.053931	0.315047
	-0.0280577	-0.138904	0.0370088	0.323588
	0.00892342	-0.16097	0.00316065	0.297115
	0.0153126	-0.175077	-0.0245353	0.240353
	0.0145362	-0.175123	-0.0298946	0.183644
	0.0287407	-0.170784	-0.0258522	0.158695
	0.0548475	-0.174735	-0.0232732	0.170864
	0.0551964	-0.182433	-0.00976958	0.20942
	0.0119991	-0.180347	0.0173376	0.258747
	-0.0348292	-0.172382	0.0408618	0.298994
	-0.0379268	-0.171707	0.0507238	0.315394
	-0.0060261	-0.178096	0.0411524	0.312878
	0.0159755	-0.183185	0.010653	0.310952
	0.00325397	-0.176242	-0.0215353	0.314658
	-0.031069	-0.149511	-0.0274684	0.320578
	-0.0450146	-0.110144	-0.00258059	0.335224
	-0.0116483	-0.0784403	0.0327255	0.35032
	0.0421365	-0.0653194	0.056784	0.348359
	0.0597978	-0.0617284	0.0565038	0.335946
	0.0303147	-0.0594312	0.0407115	0.327849
	-0.00620416	-0.0634414	0.035379	0.315743
	-0.0199627	-0.0825616	0.0520582	0.295025
	-0.0106915	-0.114758	0.0722687	0.274647
	0.00254086	-0.144467	0.0728419	0.249195
	-0.00881625	-0.15832	0.0539861	0.218408
	-0.0409724	-0.155307	0.0329343	0.210422
	-0.0476237	-0.144161	0.0300655	0.238479
	-0.00860664	-0.139276	0.0432796	0.280316
	0.0344573	-0.140999	0.0437138	0.319886
	0.0397607	-0.132928	0.0114571	0.35606
	0.00907341	-0.105547	-0.0341272	0.373197
	-0.0227405	-0.0685125	-0.0607094	0.356891
	-0.0235903	-0.0394303	-0.060666	0.318692
	0.00330136	-0.0320315	-0.0494744	0.271914
	0.0120889	-0.0476881	-0.0492246	0.215368
	-0.0262222	-0.0709063	-0.0686278	0.174573
	-0.0831305	-0.0855633	-0.0874106	0.184085
	-0.100005	-0.0910577	-0.0769246	0.231593
	-0.0553815	-0.0943469	-0.0379236	0.288065
	0.00803108	-0.0966618	0.000350485	0.342071
	0.0283129	-0.0943619	0.013634	0.373579
	-0.0150824	-0.085879	0.0030248	0.360065
	-0.081627	-0.0742227	-0.00817782	0.319476
	-0.111091	-0.0677406	0.000821841	0.279209
	-0.0885785	-0.0677302	0.0250889	0.234624
	-0.0609981	-0.0673424	0.039965	0.185682
	-0.0711006	-0.0595537	0.0300295	0.157603
	-0.0999937	-0.0482022	0.00491809	0.162641
	-0.0914007	-0.0441326	-0.0124775	0.189341
	-0.024931	-0.0485097	-0.0127286	0.220433
	0.0511398	-0.0578356	-0.0114787	0.240916
	0.069452	-0.0670858	-0.0240639	0.238903
	0.0171523	-0.0704021	-0.040881	0.222456
	-0.0569694	-0.069618	-0.0412785	0.215808
	-0.090956	-0.0758829	-0.0232612	0.221156
	-0.0679747	-0.0908124	0.000600262	0.216136
	-0.0300621	-0.0990829	0.00914476	0.202372
	-0.0327763	-0.0901251	-0.0155021	0.201476
	-0.0722493	-0.0673804	-0.0606165	0.217154
	-0.0998119	-0.0413433	-0.0858849	0.241034
	-0.0857883	-0.0241632	-0.0800598	0.265623
	-0.0427806	-0.021638	-0.0728749	0.275735
	-0.00598037	-0.0268298	-0.0786644	0.263753
	-0.000213506	-0.031652	-0.0844452	0.247908
	-0.00825766	-0.0425376	-0.0798078	0.245044
	0.00783316	-0.0695265	-0.0615578	0.248616
	0.0439988	-0.109119	-0.0350015	0.250803
	0.0587193	-0.140147	-0.0204838	0.256186
	0.0316981	-0.146326	-0.0300055	0.264608
	-0.0163591	-0.130493	-0.0406716	0.271167
	-0.0483648	-0.106615	-0.030685	0.280219
	-0.0424708	-0.0915354	-0.0100504	0.296916
	-0.0166376	-0.0916018	0.00174121	0.307009
	-0.0167207	-0.0944843	-0.00555638	0.298574
	-0.0559211	-0.0860944	-0.03042	0.28395
	-0.0946759	-0.0731505	-0.0569271	0.272672
	-0.0965943	-0.0767702	-0.0633936	0.269157
	-0.0666489	-0.104017	-0.0563863	0.288235
	-0.031409	-0.141306	-0.0588958	0.326546
	-0.0102599	-0.167864	-0.0769971	0.356235
	-0.0105731	-0.168455	-0.0985616	0.366757
	-0.0134825	-0.144818	-0.10836	0.365189
	0.00156748	-0.116258	-0.0971536	0.341503
	0.0211053	-0.101749	-0.0723525	0.296566
	0.0142732	-0.100058	-0.0552498	0.267536
	-0.0164478	-0.0976314	-0.0497354	0.280068
	-0.0480974	-0.0954309	-0.0413369	0.322594
	-0.0620942	-0.105068	-0.0254055	0.379448
	-0.0529207	-0.129828	-0.0107443	0.430637
	-0.0393028	-0.164411	-0.00625236	0.439722
	-0.0489655	-0.19069	-0.015924	0.397998
	-0.0772491	-0.188919	-0.0312948	0.343854
	-0.0886984	-0.164817	-0.0296807	0.308074
	-0.0679183	-0.145381	-0.00575696	0.287014
	-0.0412192	-0.140895	0.0149815	0.28375
	-0.0397966	-0.140649	0.00777921	0.303753
	-0.0590099	-0.131947	-0.024757	0.327684
	-0.0675288	-0.114026	-0.060426	0.349614
	-0.0500321	-0.0995889	-0.0761703	0.384153
	-0.0219644	-0.106064	-0.0672787	0.418385
	-0.0119083	-0.129956	-0.052234	0.428063
	-0.0369588	-0.148149	-0.0515155	0.422381
	-0.076076	-0.151363	-0.0669303	0.420065
	-0.0881905	-0.149126	-0.0806046	0.413713
	-0.0645289	-0.150952	-0.0752618	0.399119
	-0.0448552	-0.158416	-0.0524856	0.384891
	-0.06759	-0.164751	-0.0336009	0.368104
	-0.130739	-0.161891	-0.0339954	0.346917
	-0.187036	-0.150104	-0.0525296	0.343229
	-0.187398	-0.149042	-0.0805116	0.373915
	-0.121782	-0.174458	-0.103568	0.421782
	-0.0367246	-0.209436	-0.110377	0.457946
	0.00961163	-0.227396	-0.106609	0.469064
	0.00869788	-0.220823	-0.104313	0.450696
	-0.0054151	-0.19923	-0.0962826	0.406478
	-0.0103103	-0.175898	-0.0749294	0.356752
	-0.0107412	-0.163295	-0.0590407	0.319853
	-0.0139511	-0.156313	-0.0658502	0.300206
	-0.0188971	-0.141572	-0.0892415	0.306465
	-0.0137047	-0.124379	-0.115645	0.341894
	0.0178775	-0.123628	-0.131136	0.377412
	0.0563727	-0.138612	-0.114172	0.375428
	0.0536226	-0.151555	-0.0673971	0.333445
	-0.00169615	-0.150806	-0.0310455	0.281612
	-0.0639347	-0.139011	-0.0295468	0.243371
	-0.0853635	-0.129472	-0.0440065	0.225793
	-0.0547816	-0.133139	-0.0455494	0.224408
	-0.000636569	-0.146438	-0.0292857	0.218594
	0.028215	-0.157237	-0.00969193	0.192332
	0.0157394	-0.154641	-0.0121148	0.158394
	-0.00287896	-0.143862	-0.0451558	0.134199
	0.0100346	-0.139997	-0.0830966	0.113869
	0.039227	-0.145618	-0.0955564	0.0929135
	0.0503078	-0.147887	-0.0842533	0.0824078
	0.0287938	-0.136927	-0.0751731	0.0760395
	-0.0120629	-0.11875	-0.082728	0.0662232
	-0.0475174	-0.107683	-0.10064	0.0644796
	-0.057109	-0.113141	-0.109266	0.0697843
	-0.0496283	-0.134326	-0.0944066	0.0700923
	-0.0512163	-0.160466	-0.0695393	0.080002
	-0.0632125	-0.179614	-0.0628877	0.11332
	-0.0602209	-0.18952	-0.0827313	0.140909
	-0.0312647	-0.193301	-0.110372	0.131436
	0.010961	-0.192468	-0.127472	0.0919058
	0.0441943	-0.183548	-0.130634	0.0418734
	0.0484412	-0.172329	-0.132918	-0.00584238
	0.0279544	-0.165265	-0.147926	-0.0280116
	0.0151417	-0.160606	-0.16434	-0.00891133
	0.0297707	-0.15869	-0.156854	0.0323027
	0.0524175	-0.163038	-0.122964	0.0766305
	0.04843	-0.165938	-0.0897157	0.123593
	0.0123869	-0.163355	-0.0809624	0.155274
	-0.0204024	-0.16158	-0.0975541	0.148873
	-0.0169373	-0.161718	-0.122218	0.125976
	0.0194265	-0.159526	-0.135838	0.119317
	0.0541053	-0.154868	-0.133386	0.11464
	0.057548	-0.1459	-0.128715	0.0934736
	0.0245968	-0.134901	-0.1364	0.0666175
	-0.0156673	-0.133486	-0.151361	0.0424833
	-0.0362413	-0.145614	-0.154233	0.0280934
	-0.045811	-0.154385	-0.137021	0.0424318
	-0.0700422	-0.146609	-0.11413	0.0867256
	-0.104956	-0.127849	-0.104198	0.133473
	-0.12295	-0.112254	-0.117555	0.159286
	-0.101794	-0.116402	-0.151449	0.154176
	-0.0478112	-0.143388	-0.186879	0.109953
	7.50135e-05	-0.177605	-0.199556	0.0352444
	-0.00283838	-0.196607	-0.189019	-0.0345298
	-0.0529244	-0.200034	-0.185139	-0.0701487
	-0.0940781	-0.201889	-0.204965	-0.0740584
	-0.0846892	-0.20242	-0.230889	-0.0588618
	-0.0490296	-0.194256	-0.240421	-0.0284532
	-0.0363203	-0.181025	-0.228936	0.00458319
	-0.0672544	-0.163534	-0.203959	0.027283
	-0.118833	-0.140512	-0.18448	0.045304
	-0.143405	-0.120466	-0.1877	0.0617145
	-0.116303	-0.10857	-0.198584	0.0578745
	-0.0700717	-0.0973553	-0.191501	0.0274788
	-0.0534716	-0.0895724	-0.170455	-0.0139388
	-0.0659057	-0.0960908	-0.157422	-0.0558478
	-0.081585	-0.116194	-0.155239	-0.0913646
	-0.0841931	-0.138916	-0.155534	-0.111866
	-0.0734297	-0.156922	-0.149639	-0.121659
	-0.0606645	-0.162968	-0.127705	-0.136964
	-0.0663859	-0.1552	-0.0995689	-0.15923
	-0.0805907	-0.140711	-0.0911128	-0.166863
	-0.0734152	-0.126381	-0.107248	-0.150502
	-0.0400737	-0.113721	-0.119953	-0.11817
	-0.00619315	-0.0997343	-0.109712	-0.0787801
	0.00510349	-0.088495	-0.0900639	-0.0495475
	-0.0121407	-0.0903809	-0.0877905	-0.0542248
	-0.0404929	-0.106657	-0.119931	-0.094725
	-0.0461096	-0.129135	-0.176738	-0.154964
	-0.0183681	-0.150345	-0.226717	-0.23331
	0.00556315	-0.162243	-0.245578	-0.315805
	-0.00661654	-0.162597	-0.240267	-0.362729
	-0.04117	-0.155613	-0.230812	-0.364725
	-0.0652994	-0.151893	-0.22558	-0.348868
	-0.0669453	-0.155287	-0.22368	-0.324357
	-0.0524334	-0.161045	-0.217696	-0.289832
	-0.0435118	-0.161254	-0.200613	-0.261621
	-0.0603839	-0.155781	-0.175821	-0.243686
	-0.0854203	-0.149898	-0.157437	-0.223266
	-0.0826363	-0.150154	-0.151592	-0.205446
	-0.0496657	-0.158182	-0.154555	-0.202804
	-0.0199426	-0.167885	-0.160644	-0.204963
	-0.0226951	-0.166037	-0.164051	-0.202386
	-0.0639968	-0.152825	-0.16815	-0.211383
	-0.10835	-0.140371	-0.181654	-0.230982
	-0.115262	-0.135942	-0.201736	-0.240109
	-0.0852756	-0.138207	-0.210887	-0.242085
	-0.0537836	-0.141955	-0.201704	-0.251781
	-0.0396936	-0.138999	-0.188558	-0.258196
	-0.03505	-0.133193	-0.188283	-0.253175
	-0.0261672	-0.135935	-0.200095	-0.255542
	-0.0226015	-0.145458	-0.210359	-0.263751
	-0.0506183	-0.153567	-0.210675	-0.254266
	-0.115578	-0.153421	-0.205924	-0.230165
	-0.183171	-0.145366	-0.205516	-0.206828
	-0.213876	-0.133084	-0.20943	-0.184637
	-0.195455	-0.124526	-0.208855	-0.170767
	-0.151333	-0.121795	-0.189048	-0.175359
	-0.116606	-0.121117	-0.146856	-0.184775
	-0.109714	-0.122697	-0.107589	-0.177881
	-0.111449	-0.130414	-0.104212	-0.156241
	-0.0926658	-0.142822	-0.138562	-0.130833
	-0.058032	-0.155097	-0.185527	-0.0999085
	-0.040115	-0.163584	-0.224234	-0.0634401
	-0.0542133	-0.169977	-0.238486	-0.0376579
	-0.0823794	-0.169339	-0.227998	-0.0320033
	-0.0960163	-0.161121	-0.218648	-0.0430519
	-0.0705059	-0.151687	-0.226606	-0.0706899
	-0.0242424	-0.141299	-0.230301	-0.109848
	-0.0135269	-0.125376	-0.211712	-0.134996
	-0.069415	-0.113978	-0.184101	-0.128168
	-0.148691	-0.117487	-0.162557	-0.099652
	-0.189731	-0.132795	-0.156042	-0.0673229
	-0.168609	-0.151621	-0.175104	-0.0492593
	-0.116391	-0.167573	-0.217331	-0.0656742
	-0.0950123	-0.178068	-0.257529	-0.107163
	-0.130293	-0.186126	-0.277384	-0.135525
	-0.16983	-0.199516	-0.276867	-0.125512
	-0.155362	-0.215802	-0.256732	-0.0830974
	-0.101764	-0.220983	-0.225454	-0.0324091
	-0.0680921	-0.208951	-0.203311	0.000159994
	-0.0874042	-0.193809	-0.204915	-0.0103278
	-0.147564	-0.187824	-0.225242	-0.060664
	-0.197799	-0.18098	-0.251088	-0.114047
	-0.196758	-0.159931	-0.264361	-0.14157
	-0.158402	-0.137967	-0.249838	-0.141138
	-0.131654	-0.131996	-0.21701	-0.113636
	-0.132369	-0.144541	-0.189974	-0.067949
	-0.136281	-0.164192	-0.181115	-0.0389024
	-0.125922	-0.174682	-0.186063	-0.0471335
	-0.103041	-0.168972	-0.196852	-0.0696306
	-0.0833287	-0.159501	-0.203886	-0.0872835
	-0.0898266	-0.158233	-0.20716	-0.0953083
	-0.126429	-0.164931	-0.220698	-0.0794067
	-0.152994	-0.171615	-0.245717	-0.0442838
	-0.139935	-0.17932	-0.264538	-0.0249
	-0.102872	-0.190685	-0.265784	-0.030181
	-0.0762692	-0.205933	-0.253292	-0.0440219
	-0.0699639	-0.22429	-0.231507	-0.0668173
	-0.0731243	-0.243165	-0.20474	-0.100086
	-0.0635015	-0.254467	-0.179644	-0.11973
	-0.0353747	-0.250598	-0.158389	-0.110651
	-0.015798	-0.234775	-0.146734	-0.0904044
	-0.0363997	-0.213712	-0.15756	-0.0686737
	-0.0886334	-0.193243	-0.191428	-0.0433002
	-0.131831	-0.177002	-0.228952	-0.0319708
	-0.13296	-0.16576	-0.254	-0.045128
	-0.103462	-0.157586	-0.264628	-0.058765
	-0.0772727	-0.161876	-0.264976	-0.0566595
	-0.0743838	-0.183003	-0.260183	-0.0522263
	-0.0809763	-0.207391	-0.257084	-0.0481829
	-0.0709902	-0.22107	-0.260571	-0.038874
	-0.0362555	-0.219324	-0.266417	-0.045578
	-0.00359997	-0.203228	-0.26726	-0.0790296
	-0.00901666	-0.186284	-0.260594	-0.11657
	-0.0472732	-0.184213	-0.251606	-0.145395
	-0.0743501	-0.199525	-0.240846	-0.170408
	-0.0586775	-0.217931	-0.225321	-0.188376
	-0.0218014	-0.234486	-0.212372	-0.196397
	-0.00691583	-0.251321	-0.211907	-0.201255
	-0.0373274	-0.266944	-0.21854	-0.206005
	-0.0895662	-0.27534	-0.220648	-0.202106
	-0.118745	-0.275583	-0.217514	-0.185958
	-0.105986	-0.270033	-0.207055	-0.161518
	-0.0878646	-0.263742	-0.191859	-0.130118
	-0.107533	-0.265964	-0.189989	-0.0947489
	-0.155779	-0.279099	-0.210533	-0.0723319
	-0.185276	-0.290863	-0.236566	-0.0778627
	-0.170509	-0.290767	-0.255777	-0.0990396
	-0.127448	-0.283711	-0.27572	-0.113193
	-0.0985215	-0.276137	-0.294439	-0.117823
	-0.108991	-0.269794	-0.304112	-0.117667
	-0.131306	-0.264799	-0.306334	-0.112914
	-0.111644	-0.258966	-0.302224	-0.113203
	-0.0518627	-0.252088	-0.29044	-0.116086
	-0.00924431	-0.248468	-0.28065	-0.103613
	-0.0286887	-0.251345	-0.281991	-0.0821994
	-0.0984496	-0.262441	-0.282081	-0.0729439
	-0.164246	-0.273655	-0.271434	-0.0699645
	-0.174106	-0.278331	-0.25913	-0.0529935
	-0.134921	-0.27953	-0.256519	-0.0214252
	-0.11024	-0.286504	-0.266785	0.0171894
	-0.132298	-0.295266	-0.292567	0.0616245
	-0.165838	-0.297891	-0.326652	0.097147
	-0.16374	-0.293587	-0.346171	0.111609
	-0.130221	-0.286197	-0.338712	0.116637
	-0.111127	-0.278353	-0.312076	0.12344
	-0.148977	-0.27824	-0.285147	0.12173
	-0.231212	-0.284945	-0.273923	0.10982
	-0.287119	-0.289601	-0.280512	0.101888
	-0.256835	-0.289703	-0.288242	0.0915984
	-0.166912	-0.290811	-0.284803	0.0647198
	-0.0967094	-0.294569	-0.280619	0.0384854
	-0.0881242	-0.295868	-0.283903	0.0330614
	-0.111418	-0.294809	-0.289166	0.0440854
	-0.119527	-0.294252	-0.289269	0.0792946
	-0.097004	-0.294161	-0.282483	0.145424
	-0.0780601	-0.298381	-0.272022	0.206567
	-0.100825	-0.311848	-0.269369	0.229656
	-0.156358	-0.326495	-0.281412	0.226233
	-0.182493	-0.335337	-0.293143	0.210902
	-0.137884	-0.341735	-0.286509	0.179399
	-0.0575946	-0.350353	-0.266613	0.139885
	-0.0243908	-0.363123	-0.254875	0.101981
	-0.0763392	-0.381244	-0.260253	0.0488
	-0.163874	-0.394473	-0.272276	-0.019013
	-0.206627	-0.388428	-0.275741	-0.0640618
	-0.169918	-0.365231	-0.26547	-0.0587883
	-0.0998004	-0.342475	-0.248996	-0.00491067
	-0.0683861	-0.325938	-0.241863	0.0885288
	-0.0943121	-0.317559	-0.256442	0.202618
	-0.117858	-0.312299	-0.283864	0.296725
	-0.089076	-0.302339	-0.300129	0.339661
	-0.0294499	-0.290206	-0.290784	0.345474
	0.0039615	-0.290834	-0.265089	0.347811
	-0.0115554	-0.30647	-0.240611	0.366043
	-0.0511336	-0.318359	-0.228562	0.404992
	-0.0671058	-0.315599	-0.229615	0.46574
	-0.0356369	-0.305218	-0.229963	0.547116
	0.0201271	-0.292132	-0.213118	0.647473
	0.0550288	-0.27824	-0.188125	0.755214
	0.0637278	-0.26653	-0.181062	0.836133
	0.0757025	-0.251613	-0.191313	0.866029
	0.107289	-0.23051	-0.197416	0.871146
	0.133589	-0.221551	-0.192931	0.891241
	0.122403	-0.243348	-0.180372	0.925791
	0.0642258	-0.288471	-0.159763	0.952128
	-0.00580966	-0.338679	-0.142322	0.960865
	-0.0323908	-0.381613	-0.139753	0.967152
	-0.00704255	-0.409716	-0.13878	1.00466
	0.0142939	-0.415958	-0.12827	1.10084
	-0.0122831	-0.400445	-0.116553	1.24254
	-0.0638579	-0.358923	-0.105426	1.37903
	-0.0858358	-0.292597	-0.0846459	1.47969
	-0.035642	-0.212903	-0.0517064	1.56453
	0.0792952	-0.138609	-0.0151252	1.65912
	0.198839	-0.0809197	0.0154105	1.76507
	0.265768	-0.0354957	0.0258854	1.8715
	0.290787	0.0084279	0.0133807	1.96297
	0.316746	0.0521694	-0.00545342	2.02173
	0.354816	0.0932883	-0.0116461	2.05986
	0.377713	0.128025	-0.000496182	2.11447
	0.357592	0.156944	0.0197059	2.19429
	0.299497	0.185666	0.0365886	2.2854
	0.258221	0.221542	0.0403772	2.38826
	0.285248	0.265295	0.0356509	2.49794
	0.367371	0.307023	0.0325291	2.59207
	0.435311	0.337705	0.0303459	2.66255
	0.457331	0.358277	0.023271	2.70677
	0.460681	0.372051	0.0113528	2.704
	0.483272	0.37598	0.00355549	2.65504
	0.522343	0.368221	0.0107548	2.60392
	0.541265	0.355199	0.0426837	2.58392
	0.511469	0.346707	0.0921987	2.58455
	0.462374	0.350566	0.135036	2.59236
	0.457915	0.373435	0.154608	2.60202
	0.5207	0.407562	0.154453	2.59061
	0.60125	0.439217	0.148171	2.55293
	0.623604	0.463906	0.146013	2.51664
	0.564844	0.48329	0.148967	2.49202
	0.472272	0.496249	0.150534	2.45982
	0.41491	0.50625	0.146792	2.42128
	0.410499	0.509526	0.139281	2.39191
	0.428902	0.501885	0.132873	2.36305
	0.433892	0.488142	0.127666	2.33672
	0.418686	0.479286	0.116953	2.33659
	0.411715	0.47805	0.0972762	2.35554
	0.44476	0.481477	0.0825057	2.36926
	0.499633	0.490028	0.088029	2.37876
	0.52863	0.504012	0.106327	2.39124
	0.516685	0.521707	0.117621	2.39648
	0.496436	0.543494	0.108349	2.38991
	0.495492	0.563992	0.0752172	2.37925
	0.512558	0.573478	0.0324238	2.36279
	0.515927	0.567058	0.013253	2.33417
	0.482442	0.553549	0.0334038	2.30186
	0.42993	0.540981	0.0641044	2.27221
	0.408164	0.529229	0.0742379	2.23253
	0.435776	0.523233	0.0652698	2.17466
	0.477679	0.523878	0.0527263	2.1111
	0.48801	0.522798	0.0465657	2.05828
	0.454396	0.521165	0.055651	2.0233
	0.405618	0.531532	0.0693308	2.0133
	0.384618	0.551086	0.0622287	2.02193
	0.406847	0.570026	0.0381411	2.02288
	0.431959	0.581935	0.0229294	2.0038
	0.416374	0.58352	0.0200819	1.9717
	0.374562	0.572027	0.0113359	1.92497
	0.354285	0.555736	-0.00833114	1.86764
	0.375802	0.547249	-0.0325517	1.8151
	0.423934	0.549851	-0.049063	1.77129
	0.458511	0.557306	-0.0410607	1.72685
	0.449416	0.567918	-0.0182897	1.6882
	0.416137	0.580796	-0.0142231	1.67482
	0.407693	0.589823	-0.0413495	1.68147
	0.426224	0.587929	-0.0734256	1.68834
	0.437069	0.5805	-0.0836653	1.68842
	0.418656	0.573623	-0.0663427	1.67814
	0.382905	0.564146	-0.0350383	1.64887
	0.349605	0.549042	-0.0161479	1.60508
	0.340918	0.526815	-0.0219362	1.55761
	0.352515	0.500038	-0.0379712	1.49685
	0.357521	0.482308	-0.0439391	1.41633
	0.350217	0.482777	-0.0383427	1.33629
	0.361578	0.493729	-0.0301316	1.2649
	0.402465	0.498873	-0.0309569	1.18825
	0.441232	0.491054	-0.0432242	1.11939
	0.447616	0.480923	-0.0483022	1.08816
	0.418294	0.478505	-0.0313563	1.09326
	0.37348	0.481868	-0.0110606	1.12133
	0.351737	0.479595	-0.0184487	1.15948
	0.38271	0.464435	-0.0519989	1.17568
	0.442523	0.438186	-0.0811864	1.14361
	0.478736	0.416757	-0.0830595	1.08761
	0.464237	0.412284	-0.0644382	1.04303
	0.417552	0.419374	-0.0575938	1.00963
	0.374215	0.423312	-0.0862859	0.984996
	0.349396	0.417988	-0.131516	0.973982
	0.324627	0.403809	-0.148011	0.956634
	0.286169	0.391281	-0.116644	0.910271
	0.245869	0.391801	-0.0680577	0.847955
	0.232571	0.396607	-0.0500972	0.796288
	0.257743	0.389239	-0.0789588	0.757851
	0.303062	0.369819	-0.127499	0.72988
	0.330858	0.344261	-0.159096	0.717406
	0.330884	0.321883	-0.165736	0.709744
	0.32208	0.311443	-0.166749	0.694381
	0.320939	0.3147	-0.181001	0.677781
	0.320357	0.323659	-0.206931	0.655696
	0.30502	0.331044	-0.219212	0.604883
	0.261929	0.336494	-0.199815	0.523944
	0.201044	0.337528	-0.170731	0.439005
	0.159704	0.330727	-0.171555	0.366714
	0.161652	0.317377	-0.201515	0.309241
	0.188269	0.303685	-0.225834	0.272766
	0.201858	0.289238	-0.224937	0.257338
	0.192784	0.270936	-0.202055	0.248141
	0.173409	0.249647	-0.17646	0.235557
	0.155837	0.225199	-0.173551	0.223087
	0.144361	0.194573	-0.1935	0.211166
	0.135716	0.169324	-0.199527	0.198592
	0.125405	0.163491	-0.17392	0.187498
	0.125236	0.175936	-0.146946	0.174436
	0.144158	0.198026	-0.148686	0.147847
	0.162379	0.222715	-0.177354	0.116257
	0.148975	0.240372	-0.210013	0.106114
	0.105093	0.247666	-0.221161	0.117118
	0.0498461	0.242177	-0.203643	0.125884
	0.0111819	0.227368	-0.187256	0.11879
	0.0111739	0.209228	-0.201699	0.0959771
	0.0445803	0.189284	-0.22806	0.0665974
	0.0743999	0.1691	-0.229238	0.047449
	0.0875719	0.154982	-0.201144	0.0464814
	0.0943857	0.145885	-0.175606	0.0416116
	0.0992899	0.132679	-0.184388	0.0154453
	0.0988149	0.116591	-0.229969	-0.0182861
	0.0932755	0.108222	-0.274608	-0.0496737
	0.079482	0.112833	-0.277988	-0.0849705
	0.0556048	0.132731	-0.245653	-0.119905
	0.0387573	0.160985	-0.217038	-0.142892
	0.0438151	0.174337	-0.220464	-0.162287
	0.0676532	0.160679	-0.247714	-0.182743
	0.0882198	0.130584	-0.265174	-0.193133
	0.0963753	0.101893	-0.245545	-0.206836
	0.0939782	0.0796519	-0.204509	-0.255313
	0.0910893	0.0607288	-0.190405	-0.32716
	0.099728	0.0418264	-0.226768	-0.381065
	0.122915	0.0209652	-0.286398	-0.403548
	0.141985	0.000151325	-0.325902	-0.397622
	0.143775	-0.00925099	-0.3264	-0.374176
	0.133586	-0.00434219	-0.302797	-0.373025
	0.124178	0.00586308	-0.283309	-0.419741
	0.114441	0.0152055	-0.276178	-0.479789
	0.101577	0.0217532	-0.261942	-0.513553
	0.0799247	0.0205571	-0.227941	-0.533058
	0.0544423	0.0170972	-0.194459	-0.553597
	0.0277925	0.0177201	-0.193558	-0.566216
	0.00542275	0.0178624	-0.222825	-0.569263
	-0.0112193	0.0149042	-0.249027	-0.560799
	-0.0205108	0.0186368	-0.247868	-0.532145
	-0.00915902	0.0242523	-0.231561	-0.50352
	0.0388782	0.0194868	-0.228006	-0.514472
	0.0998317	0.00456224	-0.249762	-0.562391
	0.122197	-0.0203838	-0.28231	-0.603572
	0.0883111	-0.0502034	-0.295986	-0.613306
	0.0270721	-0.0683945	-0.276553	-0.598883
	-0.0227116	-0.0671565	-0.246234	-0.570938
	-0.0369978	-0.055447	-0.244208	-0.549041
	-0.0156086	-0.0405204	-0.275804	-0.555797
	0.0101362	-0.0215849	-0.308688	-0.587073
	0.0145886	-0.00188958	-0.317501	-0.621974
	0.00755166	0.0118311	-0.307643	-0.656658
	0.0120131	0.0214672	-0.295142	-0.694159
	0.0307492	0.0282253	-0.294658	-0.72262
	0.0485628	0.0273437	-0.310535	-0.732026
	0.0426466	0.0169333	-0.322148	-0.72858
	0.00684631	0.00448402	-0.311507	-0.715947
	-0.0357261	-0.0121379	-0.293306	-0.695911
	-0.0413061	-0.0377754	-0.289684	-0.680682
	-0.00806052	-0.0646247	-0.294525	-0.677435
	0.0235331	-0.0771219	-0.289477	-0.679154
	0.026082	-0.0741643	-0.269636	-0.682481
	0.0158223	-0.0624375	-0.239555	-0.696812
	0.0191598	-0.0545179	-0.220588	-0.725937
	0.0521919	-0.0610612	-0.235353	-0.758947
	0.0971046	-0.076597	-0.27337	-0.7931
	0.107553	-0.0898495	-0.297067	-0.826454
	0.0660053	-0.096348	-0.293378	-0.847495
	0.0169693	-0.096547	-0.286587	-0.862739
	0.00181307	-0.0975657	-0.301278	-0.894167
	0.0136428	-0.104578	-0.336978	-0.942994
	0.0331305	-0.113402	-0.366194	-0.992304
	0.0502026	-0.119445	-0.360617	-1.04172
	0.0573826	-0.120372	-0.322381	-1.09054
	0.0572679	-0.111244	-0.284735	-1.12222
	0.0535121	-0.0894646	-0.272739	-1.13513
	0.0365416	-0.0642588	-0.281461	-1.1333
	0.00510084	-0.0433781	-0.292592	-1.10077
	-0.0185954	-0.0313598	-0.292801	-1.03717
	-0.0129065	-0.036636	-0.28726	-0.979979
	0.0109288	-0.0617314	-0.29209	-0.956369
	0.0302365	-0.0944653	-0.311227	-0.961241
	0.0289211	-0.121432	-0.326481	-0.99162
	0.009176	-0.13588	-0.321528	-1.0493
	-0.0183877	-0.140396	-0.303612	-1.11365
	-0.0333048	-0.136961	-0.290224	-1.1591
	-0.0344168	-0.129014	-0.296139	-1.18492
	-0.0364297	-0.117088	-0.321366	-1.1825
	-0.0539814	-0.0980824	-0.348609	-1.14171
	-0.0794899	-0.0747808	-0.359002	-1.09503
	-0.0949269	-0.0632488	-0.354642	-1.08213
	-0.0871904	-0.0687645	-0.352415	-1.09589
	-0.0608989	-0.0851934	-0.360399	-1.115
	-0.0313569	-0.105567	-0.368284	-1.13915
	-0.0117192	-0.120213	-0.363524	-1.15781
	-0.00855144	-0.123509	-0.351911	-1.16017
	-0.0156721	-0.121914	-0.35062	-1.16806
	-0.0183943	-0.118978	-0.36598	-1.191
	-0.0166492	-0.107498	-0.38593	-1.2
	-0.019864	-0.089932	-0.393196	-1.17811
	-0.0226784	-0.0774055	-0.376791	-1.1405
	-0.0198457	-0.0732754	-0.34599	-1.10851
	-0.0188274	-0.0834049	-0.329177	-1.09555
	-0.0244646	-0.110743	-0.340965	-1.11141
	-0.0341191	-0.14125	-0.362697	-1.15094
	-0.04754	-0.162687	-0.371633	-1.19064
	-0.0512987	-0.176081	-0.368952	-1.21979
	-0.0360205	-0.185466	-0.362289	-1.24861
	-0.0169866	-0.182981	-0.357194	-1.27327
	-0.0194258	-0.16449	-0.364803	-1.27547
	-0.0338126	-0.136211	-0.382238	-1.25961
	-0.0433345	-0.110638	-0.384838	-1.24599
	-0.0464778	-0.0977949	-0.364508	-1.24067
	-0.0521641	-0.108988	-0.342158	-1.24341
	-0.0647486	-0.135766	-0.327105	-1.2533
	-0.0889558	-0.15393	-0.318924	-1.25707
	-0.113542	-0.156622	-0.324094	-1.24989
	-0.115556	-0.158965	-0.339684	-1.25427
	-0.0888493	-0.168849	-0.349266	-1.28397
	-0.051468	-0.181527	-0.351045	-1.32888
	-0.0153723	-0.190561	-0.354268	-1.37707
	0.013929	-0.188061	-0.357086	-1.42124
	0.0292678	-0.172584	-0.360713	-1.45434
	0.0353691	-0.160094	-0.371934	-1.469
	0.0383195	-0.16166	-0.385949	-1.46804
	0.0262466	-0.173528	-0.39319	-1.45475
	0.000128262	-0.187459	-0.395134	-1.42786
	-0.0123653	-0.198785	-0.395278	-1.40523
	0.00127928	-0.211441	-0.388093	-1.41237
	0.0276816	-0.228384	-0.37411	-1.43872
	0.0507343	-0.246345	-0.359221	-1.45228
	0.0566366	-0.261779	-0.34582	-1.44913
	0.0335305	-0.272965	-0.334203	-1.44189
	0.0066076	-0.276592	-0.325153	-1.43745
	0.00496603	-0.278363	-0.320174	-1.45095
	0.0239998	-0.287504	-0.326306	-1.48188
	0.0349288	-0.306013	-0.353746	-1.49829
	0.0279184	-0.32649	-0.39303	-1.49129
	0.0107582	-0.341202	-0.424295	-1.49088
	0.00328841	-0.340164	-0.440244	-1.50362
	0.0105087	-0.327632	-0.444668	-1.51107
	0.0142463	-0.320117	-0.440602	-1.51248
	-0.00889966	-0.32353	-0.432939	-1.51484
	-0.04618	-0.325074	-0.424792	-1.51031
	-0.0572304	-0.31584	-0.411641	-1.49531
	-0.0258465	-0.303056	-0.396962	-1.48247
	0.0195327	-0.304209	-0.392541	-1.469
	0.0379907	-0.323714	-0.40217	-1.44901
	0.0181664	-0.346483	-0.416152	-1.44894
	-0.0114142	-0.35619	-0.421274	-1.48691
	-0.015092	-0.34985	-0.413602	-1.53547
	0.0145606	-0.338116	-0.403167	-1.56699
	0.055865	-0.33583	-0.398161	-1.58328
	0.0795415	-0.342021	-0.390849	-1.58191
	0.0684514	-0.346679	-0.371563	-1.55938
	0.0290426	-0.345193	-0.341225	-1.53667
	-0.00735529	-0.340051	-0.307463	-1.5211
	-0.0250965	-0.338846	-0.283202	-1.49594
	-0.0287459	-0.347033	-0.282394	-1.46756
	-0.0319802	-0.361265	-0.301215	-1.45979
	-0.0456887	-0.368424	-0.322077	-1.47561
	-0.0742802	-0.371112	-0.334827	-1.5065
	-0.0951683	-0.378094	-0.336946	-1.54706
	-0.0942583	-0.390273	-0.329128	-1.58621
	-0.0839731	-0.401594	-0.324086	-1.60853
	-0.0775139	-0.407484	-0.339221	-1.61593
	-0.0648996	-0.40214	-0.365208	-1.62614
	-0.0374865	-0.387554	-0.382372	-1.64368
	-0.00230177	-0.372284	-0.393328	-1.65734
	0.025893	-0.366191	-0.40651	-1.66137
	0.0291073	-0.369384	-0.417217	-1.65448
	0.0034379	-0.375637	-0.426519	-1.64021
	-0.0246539	-0.385089	-0.440028	-1.6366
	-0.0315716	-0.404335	-0.444481	-1.65944
	-0.0235737	-0.431945	-0.431315	-1.69459
	-0.016871	-0.462065	-0.416738	-1.71798
	-0.013075	-0.485958	-0.410289	-1.73078
	-0.00939519	-0.491358	-0.40579	-1.73938
	-0.000504204	-0.473793	-0.407349	-1.73734
	0.0269812	-0.449404	-0.423343	-1.72302
	0.065372	-0.437672	-0.443309	-1.70241
	0.0832662	-0.438831	-0.45468	-1.68366
	0.0661962	-0.445204	-0.454307	-1.67669
	0.0330833	-0.45202	-0.443615	-1.69065
	0.000487145	-0.462385	-0.430793	-1.71759
	-0.0124977	-0.48117	-0.428158	-1.73541
	0.00315324	-0.508451	-0.435383	-1.74357
	0.0313426	-0.532181	-0.441479	-1.75347
	0.047233	-0.534213	-0.444819	-1.75822
	0.0514589	-0.50747	-0.445044	-1.75125
	0.0462026	-0.475042	-0.440242	-1.74248
	0.03169	-0.460418	-0.437881	-1.72724
	0.0201892	-0.465269	-0.446236	-1.69539
	0.0233471	-0.478541	-0.460353	-1.66828
	0.0279904	-0.490038	-0.471466	-1.66301
	0.0238898	-0.493402	-0.479677	-1.65979
	0.016438	-0.497282	-0.484396	-1.65057
	0.0131449	-0.51123	-0.486046	-1.65234
	0.00766736	-0.525621	-0.490026	-1.65259
	-0.00549951	-0.523734	-0.494785	-1.62428
	-0.0172566	-0.509815	-0.493267	-1.57554
	-0.0195584	-0.49924	-0.488947	-1.52993
	-0.0202421	-0.503444	-0.49023	-1.49948
	-0.0283013	-0.519701	-0.494996	-1.50074
	-0.0465486	-0.533064	-0.497383	-1.54422
	-0.0744904	-0.531121	-0.493938	-1.59368
	-0.0936489	-0.523718	-0.482719	-1.59824
	-0.0851032	-0.531004	-0.468656	-1.56059
	-0.0504284	-0.558068	-0.465478	-1.51335
	-0.0194945	-0.589511	-0.478527	-1.47817
	-0.0125945	-0.605349	-0.496406	-1.47684
	-0.0278728	-0.601577	-0.502352	-1.51456
	-0.0458807	-0.587576	-0.491583	-1.55595
	-0.0504542	-0.584665	-0.480682	-1.57211
	-0.0328707	-0.598854	-0.487342	-1.5783
	-0.00894893	-0.610981	-0.510538	-1.58773
	-0.00411278	-0.606093	-0.534794	-1.58698
	-0.0179271	-0.598378	-0.546467	-1.57179
	-0.0168717	-0.605489	-0.536562	-1.55033
	0.0105856	-0.631275	-0.511926	-1.52617
	0.0372465	-0.667564	-0.493067	-1.51353
	0.0336696	-0.695189	-0.484614	-1.53574
	-0.00975581	-0.693517	-0.473844	-1.58965
	-0.0730118	-0.673744	-0.465169	-1.64248
	-0.108873	-0.662014	-0.480456	-1.67185
	-0.097202	-0.667257	-0.518287	-1.68166
	-0.0689886	-0.680086	-0.55347	-1.67879
	-0.057488	-0.693615	-0.567163	-1.66788
	-0.058726	-0.708561	-0.552544	-1.65972
	-0.0527275	-0.734648	-0.520256	-1.65149
	-0.03483	-0.773505	-0.501997	-1.62947
	-0.0214472	-0.804049	-0.5204	-1.5995
	-0.0415583	-0.801314	-0.554392	-1.5788
	-0.0957143	-0.766447	-0.573293	-1.57322
	-0.143948	-0.729337	-0.575515	-1.58266
	-0.147818	-0.713729	-0.57245	-1.60577
	-0.122519	-0.717434	-0.571595	-1.62735
	-0.111276	-0.720801	-0.575271	-1.62715
	-0.136382	-0.715822	-0.575466	-1.61104
	-0.178705	-0.713673	-0.559621	-1.59363
	-0.204001	-0.728746	-0.537364	-1.574
	-0.185691	-0.757223	-0.529405	-1.54987
	-0.141329	-0.782284	-0.538812	-1.52977
	-0.122342	-0.787883	-0.553918	-1.51696
	-0.145372	-0.77746	-0.56456	-1.49935
	-0.172801	-0.768529	-0.56914	-1.481
	-0.174963	-0.777797	-0.574841	-1.4783
	-0.1552	-0.79787	-0.591302	-1.49014
	-0.140688	-0.809221	-0.612222	-1.51451
	-0.15359	-0.808802	-0.618558	-1.55157
	-0.182293	-0.808525	-0.602305	-1.57601
	-0.186824	-0.814045	-0.574404	-1.56736
	-0.158801	-0.828304	-0.555119	-1.55354
	-0.136955	-0.846569	-0.556265	-1.56172
	-0.157994	-0.85571	-0.572824	-1.57583
	-0.210515	-0.850627	-0.58523	-1.58002
	-0.246528	-0.843326	-0.583107	-1.58359
	-0.238032	-0.841444	-0.576378	-1.58806
	-0.205408	-0.841932	-0.574107	-1.59259
	-0.192038	-0.841155	-0.569977	-1.61411
	-0.209027	-0.835956	-0.557869	-1.65091
	-0.22915	-0.829074	-0.545447	-1.681
	-0.206386	-0.833137	-0.544897	-1.70114
	-0.138313	-0.857045	-0.560274	-1.71953
	-0.0784615	-0.887913	-0.582189	-1.71979
	-0.0828273	-0.911209	-0.595953	-1.68404
	-0.141434	-0.923719	-0.596511	-1.63419
	-0.19562	-0.932618	-0.597999	-1.59199
	-0.198904	-0.943648	-0.62011	-1.55595
	-0.161076	-0.956261	-0.663106	-1.54088
	-0.132772	-0.957386	-0.702354	-1.56151
	-0.157651	-0.935741	-0.713655	-1.5926
	-0.222119	-0.902072	-0.696438	-1.60435
	-0.263201	-0.880072	-0.662184	-1.6019
	-0.238818	-0.870798	-0.625076	-1.59921
	-0.182192	-0.866942	-0.602106	-1.60088
	-0.152543	-0.866041	-0.598633	-1.61213
	-0.164628	-0.870227	-0.600271	-1.62717
	-0.189206	-0.881181	-0.59991	-1.62657
	-0.191833	-0.905302	-0.613226	-1.60848
	-0.170449	-0.934559	-0.643888	-1.59276
	-0.168205	-0.948735	-0.675727	-1.59039
	-0.225458	-0.945243	-0.694087	-1.59431
	-0.304911	-0.940598	-0.689772	-1.59969
	-0.343498	-0.943107	-0.657508	-1.60875
	-0.328505	-0.947929	-0.614366	-1.6144
	-0.298797	-0.94897	-0.586442	-1.60756
	-0.298324	-0.938452	-0.573076	-1.59713
	-0.341112	-0.915623	-0.565022	-1.59051
	-0.382634	-0.892417	-0.571605	-1.58338
	-0.368758	-0.885704	-0.599378	-1.58309
	-0.307922	-0.896311	-0.629637	-1.59317
	-0.262327	-0.914231	-0.646325	-1.59804
	-0.266976	-0.934311	-0.650492	-1.58689
	-0.298964	-0.95868	-0.641196	-1.56192
	-0.30972	-0.983576	-0.62036	-1.52345
	-0.27703	-1.00463	-0.596758	-1.47342
	-0.229686	-1.01632	-0.575761	-1.43011
	-0.224553	-1.01965	-0.558547	-1.40356
	-0.270943	-1.02128	-0.555813	-1.3821
	-0.311219	-1.02969	-0.57224	-1.35757
	-0.292868	-1.04197	-0.596403	-1.33436
	-0.238514	-1.04654	-0.616918	-1.31319
	-0.203135	-1.03641	-0.623321	-1.28871
	-0.216205	-1.02251	-0.609768	-1.27134
	-0.26267	-1.02206	-0.584811	-1.27311
	-0.289963	-1.03859	-0.569709	-1.28771
	-0.267749	-1.05606	-0.575906	-1.32075
	-0.235619	-1.06102	-0.603108	-1.38813
	-0.250073	-1.05106	-0.641501	-1.46452
	-0.301227	-1.03008	-0.668933	-1.50765
	-0.333011	-1.01017	-0.668612	-1.51426
	-0.304325	-1.00253	-0.645019	-1.49301
	-0.236107	-1.00624	-0.614489	-1.44677
	-0.189873	-1.0139	-0.58784	-1.40036
	-0.209285	-1.02252	-0.572966	-1.38078
	-0.265798	-1.0301	-0.571398	-1.3767
	-0.293364	-1.03632	-0.57075	-1.37011
	-0.260243	-1.04273	-0.563056	-1.36954
	-0.206827	-1.04958	-0.55653	-1.37367
	-0.200539	-1.0558	-0.562506	-1.36698
	-0.256363	-1.06631	-0.580216	-1.35673
	-0.31504	-1.08244	-0.597608	-1.35795
	-0.315524	-1.09779	-0.603493	-1.36051
	-0.254562	-1.10554	-0.59976	-1.34874
	-0.192149	-1.10749	-0.597994	-1.32865
	-0.186655	-1.10593	-0.601908	-1.30129
	-0.231506	-1.10665	-0.609869	-1.25919
	-0.262186	-1.10824	-0.620484	-1.22521
	-0.234565	-1.10496	-0.627963	-1.22493
	-0.184643	-1.09169	-0.62875	-1.24141
	-0.185027	-1.07758	-0.631446	-1.25303
	-0.25313	-1.07488	-0.634739	-1.26319
	-0.326773	-1.0845	-0.625091	-1.27406
	-0.344822	-1.10141	-0.601352	-1.28493
	-0.305591	-1.1208	-0.572308	-1.31111
	-0.270075	-1.13526	-0.538976	-1.35877
	-0.291924	-1.14138	-0.511193	-1.39864
	-0.348243	-1.1458	-0.507453	-1.39722
	-0.353698	-1.15191	-0.518503	-1.34871
	-0.275889	-1.1517	-0.519907	-1.27247
	-0.177496	-1.13975	-0.513947	-1.20387
	-0.139913	-1.12549	-0.518227	-1.17613
	-0.189286	-1.11839	-0.531366	-1.195
	-0.279452	-1.12125	-0.545635	-1.23707
	-0.324085	-1.1318	-0.560007	-1.27856
	-0.29037	-1.14463	-0.562918	-1.3152
	-0.232206	-1.15082	-0.550455	-1.34115
	-0.212784	-1.15268	-0.545087	-1.34637
	-0.232873	-1.15734	-0.564613	-1.34608
	-0.250575	-1.16466	-0.595248	-1.36078
	-0.230393	-1.16068	-0.618572	-1.38271
	-0.183728	-1.14394	-0.625622	-1.39622
	-0.159244	-1.12709	-0.608348	-1.3967
	-0.1849	-1.11962	-0.579766	-1.38249
	-0.215987	-1.12237	-0.565374	-1.35915
	-0.185722	-1.13518	-0.568116	-1.34889
	-0.100665	-1.1543	-0.570735	-1.36145
	-0.0390112	-1.17528	-0.568306	-1.37937
	-0.0653925	-1.1985	-0.566347	-1.38971
	-0.164177	-1.22275	-0.569063	-1.38966
	-0.256016	-1.23416	-0.575999	-1.36907
	-0.2622	-1.2214	-0.574325	-1.32782
	-0.197614	-1.19194	-0.557786	-1.29547
	-0.160566	-1.16006	-0.545665	-1.29081
	-0.207116	-1.1393	-0.560596	-1.29658
	-0.284989	-1.14146	-0.594234	-1.30522
	-0.321652	-1.16721	-0.61731	-1.33455
	-0.298288	-1.20112	-0.609962	-1.38264
	-0.258934	-1.22946	-0.573637	-1.43319
	-0.261003	-1.2518	-0.532616	-1.48046
	-0.309154	-1.26826	-0.514393	-1.5016
	-0.34383	-1.27109	-0.523101	-1.47436
	-0.321857	-1.25845	-0.53842	-1.42757
	-0.271875	-1.23495	-0.545506	-1.40168
	-0.266097	-1.21275	-0.552233	-1.39034
	-0.329967	-1.2072	-0.571641	-1.3769
	-0.406015	-1.22658	-0.604871	-1.37896
	-0.414498	-1.25767	-0.634057	-1.41069
	-0.351203	-1.28258	-0.635094	-1.46569
	-0.294508	-1.29313	-0.602195	-1.53654
	-0.31805	-1.29876	-0.560452	-1.6011
	-0.410537	-1.31213	-0.541291	-1.62656
	-0.474474	-1.33678	-0.552739	-1.61357
	-0.436015	-1.35486	-0.571374	-1.5913
	-0.329367	-1.3441	-0.569517	-1.56724
	-0.255254	-1.30839	-0.551192	-1.53094
	-0.259984	-1.27307	-0.543172	-1.49606
	-0.298962	-1.25707	-0.549926	-1.48149
	-0.294628	-1.26074	-0.548124	-1.47884
	-0.232712	-1.27286	-0.52107	-1.47739
	-0.176293	-1.2823	-0.474097	-1.47677
	-0.197978	-1.28783	-0.437576	-1.46751
	-0.292697	-1.29946	-0.452014	-1.44643
	-0.367102	-1.32105	-0.516474	-1.43435
	-0.346409	-1.33768	-0.577163	-1.44687
	-0.270681	-1.33629	-0.594937	-1.46994
	-0.241659	-1.3201	-0.584788	-1.48323
	-0.304922	-1.30391	-0.57698	-1.48165
	-0.408068	-1.29547	-0.58641	-1.4703
	-0.457598	-1.29531	-0.607454	-1.46411
	-0.405823	-1.29617	-0.61343	-1.48233
	-0.311573	-1.29367	-0.584373	-1.51906
	-0.270998	-1.29061	-0.544065	-1.53828
	-0.307468	-1.30026	-0.53652	-1.51367
	-0.368737	-1.32468	-0.562244	-1.45449
	-0.397753	-1.34796	-0.58617	-1.38891
	-0.380043	-1.35253	-0.58521	-1.34227
	-0.350777	-1.34024	-0.567061	-1.33545
	-0.350271	-1.32587	-0.555604	-1.36281
	-0.363839	-1.31865	-0.572478	-1.39051
	-0.346828	-1.31824	-0.609988	-1.4008
	-0.293835	-1.32341	-0.628858	-1.40068
	-0.26217	-1.32997	-0.609149	-1.39763
	-0.299527	-1.33677	-0.574727	-1.39806
	-0.381312	-1.34806	-0.560462	-1.4173
	-0.438757	-1.36198	-0.578282	-1.45637
	-0.42821	-1.36719	-0.606975	-1.49496
	-0.361982	-1.35802	-0.611016	-1.52542
	-0.303166	-1.34344	-0.58025	-1.55102
	-0.30015	-1.33154	-0.545277	-1.56268
	-0.327748	-1.32697	-0.536214	-1.5607
	-0.32493	-1.33681	-0.551639	-1.57063
	-0.284556	-1.35974	-0.565597	-1.59679
	-0.24578	-1.38274	-0.556368	-1.61075
	-0.246953	-1.40261	-0.530531	-1.6024
	-0.292824	-1.42254	-0.521281	-1.58332
	-0.343283	-1.44035	-0.552328	-1.55603
	-0.347904	-1.44884	-0.605201	-1.53008
	-0.315428	-1.44757	-0.640842	-1.53093
	-0.297191	-1.43443	-0.639389	-1.55067
	-0.317915	-1.41138	-0.615112	-1.56219
	-0.344092	-1.38949	-0.594127	-1.57478
	-0.325631	-1.3797	-0.587153	-1.60236
	-0.267931	-1.38157	-0.5813	-1.62508
	-0.228177	-1.39354	-0.559804	-1.62581
	-0.255452	-1.4125	-0.530115	-1.61174
	-0.338481	-1.43138	-0.521696	-1.58359
	-0.414448	-1.44756	-0.54809	-1.54457
	-0.415581	-1.46069	-0.580319	-1.52571
	-0.349357	-1.46578	-0.574343	-1.54063
	-0.299596	-1.46205	-0.524007	-1.56057
	-0.329767	-1.46001	-0.473403	-1.56512
	-0.412448	-1.46525	-0.464756	-1.56179
	-0.472088	-1.46655	-0.493123	-1.55453
	-0.460082	-1.45964	-0.521577	-1.54019
	-0.402508	-1.45125	-0.518068	-1.52636
	-0.371873	-1.44359	-0.484903	-1.51505
	-0.401521	-1.43946	-0.463505	-1.4972
	-0.443283	-1.44185	-0.492974	-1.48432
	-0.434381	-1.44968	-0.555068	-1.50223
	-0.377033	-1.45773	-0.600494	-1.55065
	-0.33403	-1.47025	-0.612414	-1.60856
	-0.340028	-1.48601	-0.605128	-1.66279
	-0.366612	-1.49356	-0.596417	-1.70489
	-0.368373	-1.48729	-0.598148	-1.72633
	-0.329314	-1.47901	-0.604755	-1.72783
	-0.282213	-1.47979	-0.591442	-1.71649
	-0.280287	-1.49423	-0.561036	-1.69057
	-0.329536	-1.51897	-0.549479	-1.65059
	-0.373744	-1.54192	-0.57204	-1.61734
	-0.377379	-1.54882	-0.60034	-1.60815
	-0.357317	-1.53741	-0.602022	-1.62393
	-0.348279	-1.51978	-0.573823	-1.66458
	-0.371808	-1.50709	-0.535846	-1.72665
	-0.415251	-1.49626	-0.519532	-1.78945
	-0.429592	-1.48207	-0.539015	-1.82916
	-0.39248	-1.46663	-0.567345	-1.84438
	-0.343359	-1.45627	-0.568386	-1.84067
	-0.333209	-1.45483	-0.543649	-1.81468
	-0.370044	-1.46175	-0.527917	-1.77629
	-0.420617	-1.47518	-0.540586	-1.74445
	-0.442129	-1.49276	-0.570782	-1.72398
	-0.422569	-1.51615	-0.587485	-1.71664
	-0.388397	-1.54527	-0.572376	-1.73057
	-0.385621	-1.57085	-0.545925	-1.75427
	-0.418911	-1.57954	-0.543785	-1.76355
	-0.446932	-1.57095	-0.56909	-1.76312
	-0.440397	-1.55804	-0.588958	-1.77193
	-0.416042	-1.55319	-0.576497	-1.784
	-0.401268	-1.55168	-0.533444	-1.79337
	-0.412206	-1.54587	-0.492027	-1.81177
	-0.444808	-1.53183	-0.487704	-1.82953
	-0.469008	-1.51299	-0.522867	-1.82767
	-0.470208	-1.50159	-0.564083	-1.81879
	-0.47051	-1.50676	-0.578633	-1.81841
	-0.48922	-1.5211	-0.566356	-1.81895
	-0.511504	-1.53472	-0.554539	-1.82201
	-0.516561	-1.54708	-0.568244	-1.84315
	-0.496183	-1.56148	-0.600623	-1.86983
	-0.472875	-1.57856	-0.616667	-1.88203
	-0.478252	-1.5966	-0.596547	-1.89269
	-0.519616	-1.60962	-0.560532	-1.90869
	-0.577491	-1.61254	-0.545135	-1.90767
	-0.622128	-1.60873	-0.557136	-1.88173
	-0.623573	-1.60508	-0.568817	-1.84882
	-0.586232	-1.60368	-0.554552	-1.81701
	-0.542557	-1.60543	-0.524017	-1.79307
	-0.511118	-1.60725	-0.507997	-1.80617
	-0.488266	-1.60416	-0.521288	-1.86489
	-0.472614	-1.59836	-0.548251	-1.93689
	-0.463167	-1.5968	-0.560357	-1.99525
	-0.465959	-1.60288	-0.540958	-2.02889
	-0.488726	-1.60702	-0.506888	-2.02505
	-0.520016	-1.60507	-0.501682	-1.99129
	-0.531953	-1.5991	-0.536343	-1.95869
	-0.513712	-1.58739	-0.567435	-1.94011
	-0.485977	-1.57155	-0.555577	-1.92032
	-0.471856	-1.56622	-0.512765	-1.89133
	-0.472615	-1.57929	-0.472957	-1.86423
	-0.475097	-1.60334	-0.464642	-1.84859
	-0.474301	-1.63113	-0.494112	-1.84886
	-0.466882	-1.66138	-0.526546	-1.87007
	-0.462104	-1.68766	-0.524585	-1.90365
	-0.477169	-1.70584	-0.50425	-1.93
	-0.49963	-1.71567	-0.507298	-1.94263
	-0.500327	-1.7128	-0.537243	-1.94988
	-0.482447	-1.6961	-0.568312	-1.9515
	-0.46621	-1.67975	-0.579321	-1.94391
	-0.464908	-1.6757	-0.561438	-1.94098
	-0.482796	-1.6796	-0.52994	-1.95412
	-0.499163	-1.68182	-0.514352	-1.97972
	-0.481231	-1.683	-0.522602	-2.0194
	-0.442176	-1.69036	-0.52685	-2.06743
	-0.425376	-1.70637	-0.51047	-2.0989
	-0.449406	-1.73148	-0.491523	-2.09748
	-0.500529	-1.75494	-0.493745	-2.07567
	-0.555739	-1.75986	-0.522023	-2.05026
	-0.586674	-1.74792	-0.556462	-2.02711
	-0.585315	-1.73968	-0.565152	-2.01532
	-0.566987	-1.74211	-0.534508	-2.01233
	-0.544791	-1.74443	-0.49391	-1.99433
	-0.515067	-1.73648	-0.481475	-1.95824
	-0.476169	-1.71906	-0.503336	-1.93778
	-0.44584	-1.69772	-0.535427	-1.94886
	-0.437158	-1.68548	-0.547479	-1.96666
	-0.445345	-1.69372	-0.528425	-1.97205
	-0.466255	-1.72144	-0.496949	-1.96011
	-0.495644	-1.7555	-0.479039	-1.92609
	-0.512875	-1.78032	-0.473309	-1.89206
	-0.512607	-1.79222	-0.462128	-1.89125
	-0.508999	-1.79997	-0.44227	-1.91057
	-0.510209	-1.8088	-0.427409	-1.92397
	-0.518968	-1.8148	-0.436767	-1.94929
	-0.54087	-1.81046	-0.475296	-1.99623
	-0.559797	-1.79582	-0.523673	-2.03429
	-0.552985	-1.78371	-0.549921	-2.04157
	-0.517462	-1.78516	-0.545285	-2.02099
	-0.474174	-1.79294	-0.532196	-1.97415
	-0.449463	-1.79198	-0.532571	-1.91406
	-0.460116	-1.77712	-0.543013	-1.87485
	-0.495364	-1.75829	-0.545981	-1.86109
	-0.540688	-1.75394	-0.534225	-1.84673
	-0.585269	-1.77074	-0.520108	-1.83235
	-0.61609	-1.79472	-0.522871	-1.83657
	-0.624616	-1.80674	-0.547264	-1.8519
	-0.60752	-1.80643	-0.574325	-1.85907
	-0.568992	-1.80211	-0.572294	-1.85703
	-0.535239	-1.7986	-0.531204	-1.83986
	-0.53399	-1.79731	-0.482046	-1.79475
	-0.552651	-1.79899	-0.465957	-1.73964
	-0.560233	-1.80734	-0.485763	-1.70527
	-0.540095	-1.82548	-0.511004	-1.69272
	-0.501389	-1.85079	-0.520309	-1.69178
	-0.462883	-1.8742	-0.513466	-1.70532
	-0.439261	-1.87925	-0.504825	-1.73386
	-0.436219	-1.86228	-0.516773	-1.77253
	-0.451594	-1.83905	-0.552293	-1.81794
	-0.475881	-1.82809	-0.581162	-1.86181
	-0.503531	-1.83409	-0.581305	-1.88739
	-0.534896	-1.85328	-0.570509	-1.89122
	-0.558909	-1.8739	-0.571522	-1.89086
	-0.561796	-1.88241	-0.584711	-1.89588
	-0.549604	-1.88293	-0.597028	-1.89521
	-0.530948	-1.89396	-0.594149	-1.88467
	-0.523485	-1.9207	-0.567579	-1.87701
	-0.543026	-1.94507	-0.540863	-1.87965
	-0.568843	-1.9509	-0.544375	-1.88505
	-0.562781	-1.94111	-0.560735	-1.88445
	-0.529036	-1.93237	-0.54899	-1.8655
	-0.494447	-1.93425	-0.506793	-1.8231
	-0.476573	-1.94215	-0.467872	-1.78789
	-0.485039	-1.94015	-0.45616	-1.78848
	-0.506535	-1.91517	-0.475689	-1.81177
	-0.517215	-1.88074	-0.506483	-1.83267
	-0.517822	-1.86747	-0.512089	-1.84837
	-0.526834	-1.87981	-0.480957	-1.86752
	-0.542411	-1.89929	-0.442023	-1.89815
	-0.549613	-1.9134	-0.428764	-1.95159
	-0.540428	-1.92413	-0.443526	-2.02138
	-0.523213	-1.93779	-0.462357	-2.07695
	-0.512388	-1.95706	-0.458987	-2.10553
	-0.521143	-1.97309	-0.436541	-2.12074
	-0.558137	-1.96991	-0.429788	-2.11791
	-0.614885	-1.94621	-0.456618	-2.07634
	-0.661757	-1.92159	-0.495604	-2.0082
	-0.684009	-1.91371	-0.518025	-1.94022
	-0.688219	-1.92306	-0.523376	-1.88388
	-0.680802	-1.93918	-0.527795	-1.85763
	-0.668348	-1.95497	-0.543792	-1.87798
	-0.661679	-1.96924	-0.563046	-1.91793
	-0.657329	-1.98273	-0.559871	-1.94359
	-0.65255	-1.99667	-0.525908	-1.9612
	-0.64942	-2.00257	-0.48485	-1.97028
	-0.645468	-1.98892	-0.464565	-1.9507
	-0.628317	-1.96119	-0.468608	-1.91195
	-0.591163	-1.93787	-0.480411	-1.87791
	-0.548678	-1.92954	-0.483369	-1.84588
	-0.532843	-1.93712	-0.474931	-1.81138
	-0.560072	-1.94933	-0.46764	-1.79424
	-0.61377	-1.95047	-0.479309	-1.7978
	-0.662654	-1.94516	-0.511866	-1.80158
	-0.672626	-1.95055	-0.539425	-1.80486
	-0.639986	-1.96584	-0.531826	-1.8182
	-0.605374	-1.97252	-0.492773	-1.83248
	-0.600524	-1.95911	-0.455073	-1.84174
	-0.606742	-1.93014	-0.438945	-1.85853
	-0.599456	-1.90111	-0.43559	-1.87969
	-0.576794	-1.89346	-0.430493	-1.88552
	-0.55568	-1.90899	-0.41894	-1.87487
	-0.561613	-1.92875	-0.405532	-1.85412
	-0.597664	-1.93488	-0.400927	-1.81507
	-0.628206	-1.92986	-0.413567	-1.76585
	-0.622192	-1.92982	-0.428128	-1.73236
	-0.586238	-1.9437	-0.425107	-1.72175
	-0.559316	-1.96768	-0.412545	-1.72621
	-0.566537	-1.98766	-0.409096	-1.74582
	-0.598852	-1.98882	-0.4099	-1.78084
	-0.625221	-1.97352	-0.40528	-1.82254
	-0.623802	-1.96291	-0.399455	-1.86458
	-0.600207	-1.96416	-0.391547	-1.90966
	-0.592841	-1.96121	-0.38261	-1.95118
	-0.624529	-1.94171	-0.386877	-1.9689
	-0.659666	-1.91576	-0.412034	-1.95525
	-0.655615	-1.90449	-0.440661	-1.91796
	-0.614857	-1.91815	-0.455817	-1.86914
	-0.572769	-1.94298	-0.453067	-1.82803
	-0.563525	-1.95409	-0.430423	-1.81198
	-0.59195	-1.94004	-0.397313	-1.80969
	-0.612484	-1.91503	-0.37284	-1.79413
	-0.591853	-1.90226	-0.368035	-1.76647
	-0.5567	-1.91068	-0.382146	-1.741
	-0.546544	-1.92134	-0.411928	-1.71924
	-0.564646	-1.91688	-0.448909	-1.70606
	-0.585627	-1.90674	-0.477767	-1.70538
	-0.580671	-1.90638	-0.493809	-1.70454
	-0.545666	-1.91738	-0.499198	-1.69784
	-0.507827	-1.93265	-0.49885	-1.70697
	-0.500719	-1.94335	-0.498083	-1.74252
	-0.527312	-1.94635	-0.49959	-1.78363
	-0.561296	-1.94958	-0.497969	-1.81459
	-0.579612	-1.96097	-0.490474	-1.83964
	-0.594489	-1.97617	-0.483241	-1.85598
	-0.623129	-1.9837	-0.480166	-1.86593
	-0.656871	-1.98177	-0.481626	-1.89012
	-0.673264	-1.97665	-0.484843	-1.92081
	-0.660462	-1.97487	-0.482348	-1.92659
	-0.626984	-1.98035	-0.469833	-1.91514
	-0.606556	-1.995	-0.456377	-1.91907
	-0.621298	-2.01327	-0.455152	-1.93598
	-0.642068	-2.02595	-0.465773	-1.94914
	-0.629454	-2.03153	-0.478688	-1.96498
	-0.5783	-2.03318	-0.486695	-1.9778
	-0.520602	-2.03092	-0.488729	-1.97445
	-0.492499	-2.02706	-0.49106	-1.97037
	-0.499896	-2.02365	-0.503416	-1.97352
	-0.519869	-2.01901	-0.528102	-1.95735
	-0.533031	-2.0188	-0.55094	-1.91196
	-0.531779	-2.02986	-0.552438	-1.86947
	-0.526109	-2.04501	-0.529117	-1.85522
	-0.532584	-2.05834	-0.50091	-1.86959
	-0.541045	-2.06895	-0.48392	-1.90985
	-0.527049	-2.07557	-0.47065	-1.96058
	-0.503394	-2.0784	-0.44676	-1.98981
	-0.49664	-2.08134	-0.419871	-1.99169
	-0.513158	-2.08281	-0.402163	-1.9882
	-0.543333	-2.07597	-0.397163	-1.98615
	-0.568424	-2.06872	-0.40907	-1.97305
	-0.560826	-2.07364	-0.437778	-1.94625
	-0.528225	-2.08955	-0.472806	-1.90525
	-0.506161	-2.10446	-0.510553	-1.84482
	-0.511734	-2.11179	-0.552972	-1.78263
	-0.527315	-2.11293	-0.582095	-1.75464
	-0.525693	-2.11106	-0.581426	-1.77323
	-0.501496	-2.11231	-0.564538	-1.82283
	-0.470527	-2.12057	-0.549705	-1.88482
	-0.454203	-2.12533	-0.534746	-1.94074
	-0.457859	-2.11788	-0.520449	-1.97003
	-0.462474	-2.10882	-0.51727	-1.96229
	-0.446641	-2.10977	-0.52186	-1.92249
	-0.429466	-2.12033	-0.528245	-1.85781
	-0.43893	-2.13816	-0.540678	-1.77619
	-0.468907	-2.15362	-0.552181	-1.69922
	-0.498643	-2.15328	-0.542945	-1.64138
	-0.511878	-2.13846	-0.511618	-1.596
	-0.490688	-2.12792	-0.48004	-1.56547
	-0.449193	-2.13017	-0.462806	-1.56777
	-0.424348	-2.13498	-0.461802	-1.60407
	-0.419538	-2.13843	-0.468457	-1.65301
	-0.410724	-2.15154	-0.470711	-1.69504
	-0.39613	-2.18446	-0.467569	-1.7104
	-0.386235	-2.2287	-0.469891	-1.68931
	-0.39958	-2.26185	-0.479569	-1.65934
	-0.447707	-2.26896	-0.486043	-1.6539
	-0.505233	-2.25303	-0.485981	-1.66593
	-0.530565	-2.22984	-0.486447	-1.6736
	-0.518187	-2.21378	-0.497417	-1.67692
	-0.49898	-2.20461	-0.524145	-1.67805
	-0.499791	-2.19919	-0.554829	-1.67145
	-0.51765	-2.19835	-0.565279	-1.66876
	-0.529573	-2.20189	-0.551866	-1.68009
	-0.520884	-2.20639	-0.539245	-1.68412
	-0.490765	-2.20981	-0.547348	-1.66263
	-0.459071	-2.21161	-0.572938	-1.63366
	-0.45708	-2.21103	-0.596474	-1.61013
	-0.48502	-2.20911	-0.599086	-1.59244
	-0.505274	-2.20887	-0.582798	-1.59765
	-0.495262	-2.21155	-0.572415	-1.63158
	-0.464498	-2.21611	-0.586033	-1.66897
	-0.435026	-2.21943	-0.608998	-1.69925
	-0.423272	-2.22271	-0.614438	-1.73964
	-0.42795	-2.2297	-0.592717	-1.7818
	-0.435984	-2.23796	-0.556973	-1.7976
	-0.449383	-2.23942	-0.525275	-1.78865
	-0.470974	-2.23157	-0.506536	-1.76681
	-0.500087	-2.21966	-0.497877	-1.73018
	-0.526538	-2.21287	-0.491845	-1.69106
	-0.529575	-2.21478	-0.484415	-1.67547
	-0.502036	-2.21587	-0.482508	-1.68438
	-0.474452	-2.21327	-0.502016	-1.69829
	-0.469188	-2.21407	-0.544676	-1.71338
	-0.485457	-2.2237	-0.585365	-1.73016
	-0.512845	-2.24019	-0.599185	-1.73657
	-0.533207	-2.25827	-0.589923	-1.72797
	-0.541125	-2.26778	-0.574026	-1.7089
	-0.555152	-2.2563	-0.563381	-1.6717
	-0.58145	-2.22689	-0.56243	-1.61344
	-0.589284	-2.19671	-0.55563	-1.55823
	-0.558709	-2.17826	-0.519979	-1.52993
	-0.502289	-2.17461	-0.469326	-1.52605
	-0.453597	-2.18386	-0.445149	-1.53577
	-0.438439	-2.19905	-0.456133	-1.55614
	-0.455469	-2.2087	-0.478254	-1.57693
	-0.481618	-2.20947	-0.49406	-1.58104
	-0.496661	-2.20675	-0.498705	-1.56645
	-0.493911	-2.20245	-0.496755	-1.53515
	-0.484505	-2.19462	-0.501017	-1.48556
	-0.471453	-2.19153	-0.513533	-1.43227
	-0.450502	-2.19725	-0.513436	-1.40085
	-0.433738	-2.20199	-0.496861	-1.39752
	-0.437169	-2.20295	-0.488515	-1.40974
	-0.45322	-2.20443	-0.502306	-1.43583
	-0.479506	-2.20483	-0.522764	-1.4694
	-0.51189	-2.20089	-0.530884	-1.49194
	-0.527858	-2.19926	-0.522843	-1.50196
	-0.520121	-2.20483	-0.503256	-1.50346
	-0.507808	-2.21304	-0.48733	-1.48319
	-0.503405	-2.22039	-0.485315	-1.43579
	-0.518485	-2.22744	-0.489971	-1.38618
	-0.560974	-2.23024	-0.486795	-1.35732
	-0.602803	-2.22464	-0.477301	-1.34892
	-0.61255	-2.21355	-0.472508	-1.36452
	-0.596562	-2.20841	-0.477848	-1.4034
	-0.580187	-2.21598	-0.488891	-1.4407
	-0.573599	-2.23425	-0.48878	-1.45351
	-0.570267	-2.25555	-0.466673	-1.4416
	-0.561431	-2.2661	-0.435974	-1.40192
	-0.548817	-2.25833	-0.418186	-1.33559
	-0.538637	-2.24323	-0.417797	-1.27664
	-0.540157	-2.23309	-0.422122	-1.25135
	-0.561446	-2.23025	-0.419024	-1.24043
	-0.588482	-2.23406	-0.404163	-1.22842
	-0.597649	-2.24563	-0.38876	-1.23064
	-0.589886	-2.26207	-0.389444	-1.24493
	-0.569432	-2.27796	-0.407183	-1.25815
	-0.541604	-2.287	-0.424866	-1.28116
	-0.519517	-2.28345	-0.428746	-1.31021
	-0.510277	-2.27089	-0.421681	-1.31632
	-0.499193	-2.25797	-0.417653	-1.29945
	-0.483742	-2.24917	-0.430976	-1.28811
	-0.475036	-2.24143	-0.464641	-1.29036
	-0.482584	-2.23278	-0.503483	-1.29872
	-0.502696	-2.22197	-0.524172	-1.31678
	-0.522676	-2.2126	-0.518854	-1.33445
	-0.535737	-2.2102	-0.499507	-1.32644
	-0.541272	-2.21941	-0.47957	-1.29208
	-0.535963	-2.23754	-0.457659	-1.25736
	-0.525988	-2.25235	-0.43265	-1.23952
	-0.5284	-2.25749	-0.420908	-1.2426
	-0.539096	-2.25672	-0.435115	-1.26673
	-0.548721	-2.2524	-0.461531	-1.29409
	-0.556161	-2.24612	-0.475115	-1.29629
	-0.554432	-2.23821	-0.464359	-1.27896
	-0.542718	-2.227	-0.431162	-1.27368
	-0.538425	-2.21321	-0.390173	-1.2889
	-0.54155	-2.20721	-0.365633	-1.31064
	-0.538387	-2.21282	-0.360065	-1.32586
	-0.52673	-2.21827	-0.357932	-1.32464
	-0.513173	-2.21567	-0.360595	-1.30649
	-0.493591	-2.2136	-0.380259	-1.29016
	-0.46739	-2.22476	-0.402623	-1.29413
	-0.438035	-2.24813	-0.40682	-1.3127
	-0.414521	-2.27168	-0.396459	-1.32691
	-0.404364	-2.28327	-0.382271	-1.33414
	-0.414346	-2.27922	-0.372331	-1.33991
	-0.441221	-2.26415	-0.376788	-1.34039
	-0.467268	-2.25231	-0.396367	-1.33141
	-0.478539	-2.25033	-0.413803	-1.31117
	-0.485041	-2.24614	-0.421949	-1.27344
	-0.496449	-2.23323	-0.42982	-1.22583
	-0.508552	-2.22319	-0.43658	-1.19966
	-0.521437	-2.22442	-0.432923	-1.20712
	-0.526794	-2.23439	-0.417998	-1.2223
	-0.515395	-2.24604	-0.401894	-1.22809
	-0.50284	-2.25386	-0.394087	-1.22374
	-0.507709	-2.25493	-0.401641	-1.20513
	-0.519866	-2.25411	-0.418109	-1.17939
	-0.522212	-2.25576	-0.423122	-1.16331
	-0.510936	-2.25493	-0.410476	-1.1531
	-0.493433	-2.24613	-0.395368	-1.1381
	-0.487079	-2.23508	-0.396609	-1.13319
	-0.504479	-2.23317	-0.416123	-1.15069
	-0.5319	-2.24441	-0.437554	-1.17285
	-0.547187	-2.26354	-0.437932	-1.18699
	-0.542961	-2.28526	-0.417191	-1.20065
	-0.539304	-2.29893	-0.399112	-1.20837
	-0.551702	-2.29418	-0.399032	-1.20226
	-0.568896	-2.27885	-0.408877	-1.20073
	-0.570091	-2.26492	-0.412258	-1.21112
	-0.559014	-2.25322	-0.401259	-1.21199
	-0.545048	-2.24008	-0.383266	-1.20427
	-0.53649	-2.22694	-0.378774	-1.21407
	-0.538786	-2.2179	-0.398622	-1.2378
	-0.546069	-2.22165	-0.427656	-1.25925
	-0.549074	-2.23747	-0.440635	-1.29052
	-0.553877	-2.25064	-0.433122	-1.32797
	-0.571399	-2.25136	-0.428276	-1.34485
	-0.595893	-2.24829	-0.44614	-1.33949
	-0.612005	-2.25306	-0.476193	-1.32849
	-0.609525	-2.26672	-0.489397	-1.31216
	-0.595447	-2.28099	-0.471833	-1.29516
	-0.580922	-2.2861	-0.440041	-1.29714
	-0.574559	-2.27924	-0.42352	-1.31645
	-0.579889	-2.26981	-0.436212	-1.32977
	-0.580324	-2.26655	-0.460348	-1.33001
	-0.551754	-2.26951	-0.462554	-1.32285
	-0.514393	-2.26822	-0.437055	-1.30334
	-0.507306	-2.2584	-0.418923	-1.27136
	-0.530986	-2.24694	-0.434718	-1.2473
	-0.556282	-2.23851	-0.470514	-1.24565
	-0.563571	-2.24035	-0.499771	-1.25949
	-0.539438	-2.25747	-0.50919	-1.28386
	-0.503901	-2.27907	-0.49369	-1.3169
	-0.495845	-2.29069	-0.466985	-1.34335
	-0.521634	-2.29876	-0.452045	-1.35475
	-0.551464	-2.31399	-0.441621	-1.36248
	-0.565324	-2.33289	-0.415343	-1.36809
	-0.567229	-2.34722	-0.387696	-1.36116
	-0.575145	-2.3546	-0.389632	-1.34372
	-0.601083	-2.35501	-0.419872	-1.32441
	-0.632227	-2.35063	-0.45721	-1.30143
	-0.639462	-2.34116	-0.481781	-1.27246
	-0.613539	-2.32223	-0.478966	-1.24603
	-0.585857	-2.29264	-0.461186	-1.23125
	-0.588311	-2.26303	-0.462026	-1.23169
	-0.607483	-2.25191	-0.489318	-1.2586
	-0.610303	-2.26831	-0.509091	-1.30993
	-0.59075	-2.29607	-0.493676	-1.35308
	-0.560643	-2.31796	-0.452952	-1.36055
	-0.547425	-2.33041	-0.418908	-1.34391
	-0.579978	-2.33562	-0.425188	-1.32799
	-0.640681	-2.33824	-0.475325	-1.32351
	-0.6738	-2.33851	-0.532679	-1.33668
	-0.657169	-2.3252	-0.552491	-1.35441
	-0.607443	-2.29084	-0.530297	-1.34745
	-0.560688	-2.24677	-0.493744	-1.32219
	-0.549027	-2.21363	-0.466419	-1.3133
	-0.568319	-2.20104	-0.451704	-1.32627
	-0.574701	-2.20213	-0.434128	-1.34265
	-0.554239	-2.20619	-0.405709	-1.35902
	-0.535291	-2.21381	-0.383414	-1.36891
	-0.542299	-2.23377	-0.384945	-1.35591
	-0.560347	-2.26559	-0.399801	-1.33305
	-0.553637	-2.29952	-0.407163	-1.32826
	-0.509978	-2.31706	-0.400813	-1.33301
	-0.456354	-2.30394	-0.39032	-1.32379
	-0.43127	-2.27071	-0.39481	-1.30896
	-0.452306	-2.24121	-0.424159	-1.29865
	-0.503661	-2.22137	-0.461797	-1.29123
	-0.546569	-2.203	-0.479752	-1.29698
	-0.5629	-2.17602	-0.471787	-1.31984
	-0.564359	-2.13985	-0.45984	-1.33022
	-0.557575	-2.10966	-0.465131	-1.31117
	-0.530944	-2.10319	-0.480809	-1.2894
	-0.478941	-2.11611	-0.480386	-1.28015
	-0.41773	-2.13151	-0.454684	-1.27228
	-0.385826	-2.13919	-0.423934	-1.27429
	-0.404727	-2.1448	-0.412344	-1.29921
	-0.454409	-2.15962	-0.425218	-1.33264
	-0.492507	-2.18687	-0.447197	-1.35371
	-0.492991	-2.21068	-0.454476	-1.35733
	-0.467079	-2.20739	-0.438985	-1.33949
	-0.463429	-2.17495	-0.420848	-1.30343
	-0.500221	-2.13417	-0.426993	-1.27668
	-0.544663	-2.10751	-0.458684	-1.27513
	-0.564046	-2.09499	-0.495481	-1.27648
	-0.557503	-2.08807	-0.520828	-1.26061
	-0.536573	-2.08416	-0.526045	-1.23967
	-0.525343	-2.08281	-0.516666	-1.22555
	-0.531745	-2.08961	-0.513619	-1.21419
	-0.526015	-2.11149	-0.520044	-1.20456
	-0.491343	-2.13537	-0.507037	-1.20128
	-0.451574	-2.1454	-0.465248	-1.19692
	-0.434387	-2.14684	-0.430886	-1.18355
	-0.44377	-2.14959	-0.430274	-1.16463
	-0.460141	-2.14817	-0.44971	-1.13962
	-0.454874	-2.13567	-0.461648	-1.10581
	-0.421766	-2.11035	-0.448463	-1.07733
	-0.389626	-2.07566	-0.415034	-1.0672
	-0.394386	-2.04232	-0.397649	-1.07033
	-0.43678	-2.02744	-0.421937	-1.07959
	-0.477235	-2.03491	-0.460495	-1.09882
	-0.4773	-2.05323	-0.475264	-1.12328
	-0.444959	-2.07289	-0.468152	-1.13764
	-0.418461	-2.09625	-0.4681	-1.14348
	-0.437506	-2.12502	-0.487542	-1.14506
	-0.491736	-2.14965	-0.513762	-1.13489
	-0.518303	-2.16388	-0.523477	-1.11891
	-0.474668	-2.17008	-0.499992	-1.11584
	-0.39907	-2.16888	-0.458415	-1.12232
	-0.345757	-2.16354	-0.425679	-1.11925
	-0.331384	-2.15624	-0.4095	-1.10954
	-0.339721	-2.13996	-0.397217	-1.10259
	-0.339941	-2.11246	-0.381751	-1.09478
	-0.321534	-2.08437	-0.368608	-1.09494
	-0.316605	-2.06923	-0.372835	-1.11274
	-0.351259	-2.06963	-0.406201	-1.12727
	-0.405073	-2.07726	-0.455757	-1.11629
	-0.435586	-2.08277	-0.492136	-1.09151
	-0.422293	-2.08658	-0.5015	-1.06233
	-0.383908	-2.09756	-0.493943	-1.02082
	-0.357373	-2.11872	-0.48437	-0.977864
	-0.362402	-2.14209	-0.478713	-0.956232
	-0.386907	-2.15308	-0.470433	-0.948121
	-0.401088	-2.13996	-0.446787	-0.937626
	-0.392536	-2.11333	-0.411363	-0.93117
	-0.389122	-2.09214	-0.385422	-0.917819
	-0.41462	-2.0849	-0.385365	-0.870887
	-0.447949	-2.08865	-0.405326	-0.801864
	-0.458683	-2.09562	-0.428844	-0.739311
	-0.450998	-2.09816	-0.446429	-0.687274
	-0.444392	-2.1016	-0.458146	-0.652253
	-0.458397	-2.1156	-0.468589	-0.658586
	-0.485958	-2.13774	-0.480242	-0.698792
	-0.497472	-2.15883	-0.490368	-0.737729
	-0.470884	-2.16668	-0.490363	-0.765125
	-0.424145	-2.157	-0.478122	-0.786749
	-0.395705	-2.13751	-0.465717	-0.797779
	-0.411033	-2.12199	-0.466885	-0.798024
	-0.45118	-2.1138	-0.477912	-0.800279
	-0.47085	-2.10492	-0.487848	-0.806358
	-0.449337	-2.09281	-0.499123	-0.810604
	-0.405079	-2.08623	-0.518848	-0.821255
	-0.377774	-2.09085	-0.539534	-0.84815
	-0.3966	-2.09979	-0.549057	-0.878492
	-0.442115	-2.10524	-0.548309	-0.898627
	-0.468999	-2.11171	-0.540492	-0.909144
	-0.471086	-2.12195	-0.528176	-0.905048
	-0.47449	-2.13754	-0.521974	-0.87931
	-0.489606	-2.15357	-0.524188	-0.846671
	-0.507966	-2.15015	-0.520364	-0.825843
	-0.515334	-2.11256	-0.507747	-0.813074
	-0.502797	-2.06008	-0.499414	-0.79611
	-0.487432	-2.02373	-0.490204	-0.771102
	-0.486928	-2.01539	-0.466939	-0.734699
	-0.495712	-2.0274	-0.43489	-0.690846
	-0.490657	-2.04403	-0.406999	-0.661717
	-0.468655	-2.05487	-0.389568	-0.658651
	-0.448144	-2.06384	-0.393738	-0.666223
	-0.454303	-2.08497	-0.425815	-0.675867
	-0.485941	-2.1212	-0.46623	-0.698733
	-0.519198	-2.15385	-0.491852	-0.735668
	-0.523023	-2.16477	-0.498498	-0.770116
	-0.488857	-2.15719	-0.494927	-0.794656
	-0.453383	-2.14481	-0.487321	-0.803705
	-0.459309	-2.13309	-0.47721	-0.787273
	-0.494982	-2.11965	-0.462455	-0.764936
	-0.517646	-2.10012	-0.446122	-0.76881
	-0.50888	-2.06942	-0.445391	-0.795446
	-0.480256	-2.04282	-0.472137	-0.82073
	-0.464801	-2.0452	-0.513953	-0.838924
	-0.489342	-2.0767	-0.543775	-0.845462
	-0.533682	-2.11039	-0.543193	-0.834411
	-0.558437	-2.12547	-0.515653	-0.822816
	-0.561248	-2.12288	-0.480784	-0.821405
	-0.563497	-2.11973	-0.456623	-0.806048
	-0.570584	-2.1261	-0.442004	-0.765205
	-0.566172	-2.13604	-0.430428	-0.7226
	-0.538816	-2.13079	-0.425233	-0.689222
	-0.500118	-2.1013	-0.43514	-0.658444
	-0.481966	-2.06223	-0.458713	-0.64667
	-0.504554	-2.04132	-0.481362	-0.674074
	-0.563	-2.04831	-0.486782	-0.729002
	-0.616342	-2.06563	-0.471339	-0.789427
	-0.626878	-2.07271	-0.456195	-0.842009
	-0.600545	-2.06588	-0.466374	-0.859527
	-0.573596	-2.06086	-0.502718	-0.828643
	-0.561286	-2.07514	-0.542257	-0.786668
	-0.560801	-2.10315	-0.562762	-0.764234
	-0.56144	-2.11931	-0.559544	-0.743583
	-0.552391	-2.11514	-0.542485	-0.707794
	-0.543359	-2.10525	-0.520611	-0.673273
	-0.560341	-2.10533	-0.498105	-0.656284
	-0.604581	-2.11968	-0.479577	-0.663674
	-0.638626	-2.13649	-0.465199	-0.703705
	-0.624453	-2.1389	-0.449723	-0.76355
	-0.573653	-2.12735	-0.43788	-0.807569
	-0.532528	-2.1152	-0.440691	-0.824108
	-0.527886	-2.11076	-0.448926	-0.826479
	-0.549777	-2.10513	-0.443446	-0.817265
	-0.572414	-2.09161	-0.428817	-0.791092
	-0.573919	-2.07191	-0.422418	-0.762547
	-0.562947	-2.0536	-0.430899	-0.749843
	-0.5746	-2.04381	-0.451309	-0.752859
	-0.61015	-2.04635	-0.473779	-0.768139
	-0.641044	-2.05372	-0.476672	-0.792615
	-0.646162	-2.05372	-0.454998	-0.808325
	-0.621992	-2.05083	-0.436017	-0.802548
	-0.578785	-2.06156	-0.436894	-0.78912
	-0.555359	-2.08765	-0.442736	-0.778339
	-0.566753	-2.11508	-0.439626	-0.757585
	-0.580954	-2.13138	-0.433788	-0.716347
	-0.565049	-2.13009	-0.431743	-0.663967
	-0.527001	-2.11248	-0.442253	-0.614777
	-0.498204	-2.08929	-0.469493	-0.581449
	-0.503284	-2.06804	-0.494945	-0.581397
	-0.535334	-2.04638	-0.496002	-0.617007
	-0.562516	-2.02182	-0.47985	-0.668821
	-0.56229	-2.00302	-0.469499	-0.726449
	-0.544581	-2.00352	-0.469452	-0.785195
	-0.532766	-2.02087	-0.471804	-0.825446
	-0.527506	-2.04086	-0.46689	-0.828389
	-0.509132	-2.05161	-0.452774	-0.807592
	-0.479236	-2.05264	-0.439705	-0.779942
	-0.458424	-2.04909	-0.450764	-0.74404
	-0.457941	-2.04938	-0.480894	-0.710361
	-0.480603	-2.05476	-0.50357	-0.690659
	-0.51211	-2.05405	-0.500725	-0.674824
	-0.522566	-2.0368	-0.480988	-0.659451
	-0.509429	-2.01259	-0.472988	-0.656753
	-0.508387	-1.99649	-0.494611	-0.658908
	-0.532965	-1.99569	-0.527403	-0.647485
	-0.563465	-2.00773	-0.536654	-0.638229
	-0.570443	-2.02273	-0.512577	-0.65385
	-0.545811	-2.02676	-0.479769	-0.680603
	-0.511412	-2.01517	-0.467074	-0.698541
	-0.498811	-1.99913	-0.483882	-0.712058
	-0.507156	-1.98883	-0.510702	-0.721309
	-0.512217	-1.98034	-0.516641	-0.719442
	-0.496478	-1.96802	-0.494145	-0.714554
	-0.47499	-1.95278	-0.469889	-0.699097
	-0.477657	-1.93845	-0.471139	-0.648149
	-0.501937	-1.92931	-0.494051	-0.575937
	-0.510572	-1.92596	-0.512706	-0.534123
	-0.490262	-1.92353	-0.508584	-0.535787
	-0.463779	-1.92164	-0.486597	-0.560104
	-0.456203	-1.92841	-0.465318	-0.602138
	-0.473047	-1.9431	-0.4533	-0.649994
	-0.494733	-1.95408	-0.446581	-0.674619
	-0.487294	-1.95318	-0.443805	-0.674686
	-0.447972	-1.94227	-0.447477	-0.671407
	-0.412151	-1.92353	-0.457283	-0.673476
	-0.410047	-1.90627	-0.471842	-0.679776
	-0.43457	-1.89564	-0.482729	-0.694497
	-0.449381	-1.88761	-0.478486	-0.708158
	-0.438569	-1.88074	-0.464174	-0.702028
	-0.414388	-1.88245	-0.458187	-0.683855
	-0.401424	-1.89623	-0.459988	-0.678012
	-0.415325	-1.9169	-0.458696	-0.683123
	-0.451881	-1.93985	-0.458599	-0.677635
	-0.474805	-1.95803	-0.459439	-0.657835
	-0.468866	-1.95925	-0.449404	-0.637816
	-0.460944	-1.94448	-0.433804	-0.628838
	-0.476399	-1.92882	-0.430676	-0.639415
	-0.512641	-1.92138	-0.437301	-0.665123
	-0.557632	-1.91812	-0.446822	-0.671962
	-0.588781	-1.91719	-0.465777	-0.637461
	-0.591862	-1.91929	-0.490073	-0.582739
	-0.579373	-1.91881	-0.505438	-0.53778
	-0.564758	-1.91362	-0.514576	-0.513102
	-0.542062	-1.90931	-0.524417	-0.515701
	-0.511889	-1.90845	-0.522934	-0.545022
	-0.4829	-1.90749	-0.504402	-0.583728
	-0.463056	-1.90745	-0.480837	-0.619485
	-0.456567	-1.90782	-0.459668	-0.661792
	-0.461726	-1.90684	-0.445602	-0.712025
	-0.467589	-1.90657	-0.442611	-0.749954
	-0.457421	-1.91255	-0.444982	-0.765673
	-0.435043	-1.92537	-0.438395	-0.764909
	-0.428778	-1.9387	-0.427796	-0.755675
	-0.458528	-1.94259	-0.429254	-0.75293
	-0.509831	-1.93328	-0.445833	-0.767727
	-0.557679	-1.91212	-0.471054	-0.782364
	-0.571708	-1.8866	-0.493247	-0.770565
	-0.545015	-1.8673	-0.503378	-0.746685
	-0.512028	-1.86265	-0.50565	-0.736817
	-0.509615	-1.86736	-0.514643	-0.737552
	-0.52408	-1.87125	-0.529693	-0.745852
	-0.528396	-1.87637	-0.534425	-0.771715
	-0.517066	-1.889	-0.520496	-0.801827
	-0.504109	-1.90674	-0.492557	-0.810968
	-0.510405	-1.92245	-0.462013	-0.798912
	-0.542075	-1.92927	-0.443419	-0.769173
	-0.571937	-1.92567	-0.444093	-0.719881
	-0.571404	-1.91799	-0.452787	-0.677425
	-0.542568	-1.91389	-0.458168	-0.68231
	-0.513402	-1.91224	-0.462044	-0.729225
	-0.499331	-1.90752	-0.469874	-0.783773
	-0.486186	-1.9039	-0.483195	-0.831502
	-0.46283	-1.9084	-0.49591	-0.860591
	-0.455011	-1.92077	-0.497783	-0.852425
	-0.493636	-1.93197	-0.482341	-0.818705
	-0.57639	-1.93623	-0.457753	-0.790061
	-0.669368	-1.93159	-0.440372	-0.771031
	-0.721474	-1.92543	-0.438432	-0.754802
	-0.703629	-1.92758	-0.446531	-0.755448
	-0.63455	-1.93922	-0.4538	-0.769387
	-0.559201	-1.95108	-0.459427	-0.773906
	-0.499006	-1.95739	-0.473459	-0.774503
	-0.456766	-1.95723	-0.496633	-0.790566
	-0.432261	-1.94876	-0.517108	-0.816566
	-0.428743	-1.93715	-0.52777	-0.837649
	-0.441697	-1.93029	-0.526954	-0.851138
	-0.457915	-1.92482	-0.520462	-0.848865
	-0.461463	-1.9204	-0.523406	-0.816311
	-0.447871	-1.92475	-0.541734	-0.763754
	-0.428017	-1.94043	-0.552856	-0.721173
	-0.429635	-1.95872	-0.538254	-0.699939
	-0.460673	-1.97522	-0.51541	-0.697412
	-0.495077	-1.98725	-0.508218	-0.713486
	-0.509717	-1.98626	-0.518826	-0.738837
	-0.508431	-1.97423	-0.53775	-0.755589
	-0.496611	-1.9634	-0.549495	-0.766188
	-0.483639	-1.95772	-0.536262	-0.78362
	-0.478488	-1.95222	-0.506239	-0.797155
	-0.474597	-1.95285	-0.491736	-0.788057
	-0.460686	-1.96794	-0.497523	-0.759482
	-0.444023	-1.99329	-0.501864	-0.72112
	-0.440686	-2.01807	-0.497299	-0.686364
	-0.460333	-2.03676	-0.495066	-0.678855
	-0.498326	-2.04151	-0.497833	-0.702836
	-0.518691	-2.02558	-0.502629	-0.729642
	-0.490365	-1.99725	-0.501714	-0.735988
	-0.425851	-1.97201	-0.479815	-0.729162
	-0.379369	-1.95292	-0.440666	-0.722007
	-0.388863	-1.93581	-0.409653	-0.715987
	-0.440408	-1.91711	-0.404049	-0.717946
	-0.486807	-1.89963	-0.415133	-0.726178
	-0.501538	-1.88963	-0.430575	-0.723345
	-0.487078	-1.89289	-0.447595	-0.709064
	-0.465431	-1.90447	-0.466614	-0.699802
	-0.459867	-1.91159	-0.486019	-0.692981
	-0.465856	-1.9098	-0.49739	-0.673343
	-0.459913	-1.90767	-0.490472	-0.653467
	-0.443529	-1.91065	-0.468251	-0.649082
	-0.429845	-1.91014	-0.44769	-0.653627
	-0.418931	-1.89722	-0.439574	-0.661994
	-0.40831	-1.8782	-0.44069	-0.671401
	-0.403718	-1.86454	-0.441149	-0.660346
	-0.403491	-1.85974	-0.430555	-0.625923
	-0.406686	-1.86259	-0.40891	-0.602694
	-0.415736	-1.86563	-0.388101	-0.603189
	-0.426523	-1.86049	-0.381032	-0.599837
	-0.427791	-1.84712	-0.387154	-0.58237
	-0.41474	-1.83434	-0.399012	-0.568683
	-0.400648	-1.8265	-0.40738	-0.564885
	-0.402206	-1.82334	-0.402374	-0.566438
	-0.420252	-1.82185	-0.385379	-0.579402
	-0.439424	-1.81732	-0.37136	-0.590628
	-0.450436	-1.80583	-0.372091	-0.57741
	-0.447955	-1.79151	-0.381637	-0.551735
	-0.444135	-1.78024	-0.38095	-0.537638
	-0.457347	-1.773	-0.362962	-0.532052
	-0.47931	-1.7692	-0.34263	-0.530256
	-0.480966	-1.76739	-0.333412	-0.545321
	-0.459137	-1.76035	-0.332276	-0.571264
	-0.433968	-1.74706	-0.333213	-0.589462
	-0.42099	-1.73683	-0.334816	-0.611156
	-0.419657	-1.73967	-0.332417	-0.65444
	-0.422103	-1.75193	-0.32535	-0.704186
	-0.41684	-1.76837	-0.322589	-0.734038
	-0.410175	-1.78489	-0.325284	-0.732743
	-0.424219	-1.792	-0.331976	-0.701875
	-0.473403	-1.78906	-0.351613	-0.650988
	-0.531143	-1.78372	-0.380339	-0.6035
	-0.551713	-1.77872	-0.392859	-0.577604
	-0.51772	-1.77165	-0.377335	-0.568203
	-0.452247	-1.76686	-0.350394	-0.568929
	-0.39	-1.76535	-0.325178	-0.585062
	-0.359969	-1.76004	-0.307924	-0.605948
	-0.364599	-1.7509	-0.308229	-0.605234
	-0.373512	-1.7462	-0.322618	-0.575269
	-0.373567	-1.74495	-0.328582	-0.529972
	-0.375069	-1.73975	-0.320046	-0.481127
	-0.388269	-1.72942	-0.311387	-0.442428
	-0.410591	-1.7214	-0.305826	-0.429128
	-0.434898	-1.7201	-0.300077	-0.433046
	-0.444547	-1.72668	-0.296204	-0.436594
	-0.435347	-1.7382	-0.293429	-0.447959
	-0.423436	-1.74651	-0.283838	-0.481435
	-0.423888	-1.7398	-0.267434	-0.529636
	-0.430315	-1.72129	-0.246074	-0.578385
	-0.429368	-1.70532	-0.215303	-0.617164
	-0.417328	-1.70074	-0.18318	-0.632271
	-0.405462	-1.70899	-0.167667	-0.610893
	-0.401564	-1.7271	-0.175561	-0.564417
	-0.404613	-1.74446	-0.195745	-0.507943
	-0.401901	-1.75117	-0.207118	-0.439249
	-0.384118	-1.74946	-0.19739	-0.367669
	-0.362988	-1.74375	-0.179174	-0.324264
	-0.368842	-1.72904	-0.181744	-0.322756
	-0.402409	-1.70539	-0.21398	-0.355435
	-0.434199	-1.6867	-0.255645	-0.412978
	-0.445376	-1.68237	-0.27995	-0.47163
	-0.438846	-1.68949	-0.277117	-0.504445
	-0.429739	-1.70158	-0.255819	-0.527223
	-0.432672	-1.71506	-0.234192	-0.565013
	-0.443961	-1.72499	-0.220196	-0.59023
	-0.436731	-1.73219	-0.205679	-0.56172
	-0.399138	-1.74378	-0.18791	-0.491145
	-0.35183	-1.75685	-0.178739	-0.414455
	-0.331252	-1.75944	-0.194939	-0.361562
	-0.347905	-1.75066	-0.238021	-0.355486
	-0.378815	-1.73688	-0.287444	-0.391699
	-0.39352	-1.7212	-0.312482	-0.43198
	-0.379408	-1.70375	-0.299435	-0.452629
	-0.343049	-1.68691	-0.26703	-0.471476
	-0.309423	-1.66998	-0.245636	-0.495394
	-0.299652	-1.65757	-0.248337	-0.507014
	-0.307827	-1.65946	-0.262567	-0.506766
	-0.317629	-1.68153	-0.26857	-0.50849
	-0.335492	-1.71539	-0.270895	-0.513875
	-0.364591	-1.74846	-0.29086	-0.527778
	-0.394179	-1.769	-0.323996	-0.5583
	-0.407473	-1.76993	-0.336897	-0.587473
	-0.399881	-1.75681	-0.313944	-0.591608
	-0.380621	-1.73781	-0.271781	-0.587725
	-0.371252	-1.71628	-0.240371	-0.603559
	-0.383873	-1.69449	-0.240914	-0.63606
	-0.406496	-1.68303	-0.267687	-0.669926
	-0.41456	-1.68908	-0.283524	-0.695479
	-0.39826	-1.70313	-0.266704	-0.699812
	-0.375286	-1.71593	-0.24451	-0.677595
	-0.363956	-1.72729	-0.250048	-0.645888
	-0.371166	-1.73245	-0.276356	-0.621746
	-0.38761	-1.72496	-0.296821	-0.600157
	-0.389876	-1.70538	-0.296226	-0.577711
	-0.36204	-1.68001	-0.272019	-0.569609
	-0.327614	-1.65411	-0.245469	-0.585017
	-0.319139	-1.63773	-0.250537	-0.619196
	-0.33681	-1.63549	-0.284549	-0.669179
	-0.356427	-1.64047	-0.298944	-0.725609
	-0.357772	-1.64288	-0.267137	-0.766719
	-0.333101	-1.64546	-0.215822	-0.782721
	-0.308887	-1.65247	-0.183221	-0.781114
	-0.321566	-1.66137	-0.188908	-0.763054
	-0.376821	-1.66662	-0.221071	-0.72737
	-0.436567	-1.66618	-0.242938	-0.699221
	-0.466255	-1.66111	-0.2342	-0.701929
	-0.459351	-1.65391	-0.217657	-0.732351
	-0.435793	-1.6504	-0.224545	-0.777578
	-0.419608	-1.65116	-0.249489	-0.822112
	-0.421162	-1.64483	-0.266542	-0.843875
	-0.425931	-1.62546	-0.258743	-0.840396
	-0.416685	-1.60118	-0.239219	-0.843449
	-0.402314	-1.58302	-0.239996	-0.875684
	-0.398453	-1.57763	-0.273015	-0.920234
	-0.402691	-1.58632	-0.311348	-0.955448
	-0.403069	-1.60662	-0.317834	-0.971244
	-0.39732	-1.62872	-0.286288	-0.960498
	-0.381301	-1.64449	-0.244783	-0.936118
	-0.358066	-1.65597	-0.229825	-0.929763
	-0.343781	-1.66845	-0.250177	-0.940415
	-0.343672	-1.678	-0.276102	-0.93618
	-0.344387	-1.67651	-0.273494	-0.913303
	-0.33978	-1.66011	-0.247963	-0.89039
	-0.332716	-1.6348	-0.24016	-0.865494
	-0.328431	-1.60923	-0.270196	-0.836246
	-0.330624	-1.59602	-0.314296	-0.821209
	-0.340726	-1.59874	-0.331887	-0.815001
	-0.353381	-1.61177	-0.306838	-0.796294
	-0.362506	-1.6319	-0.263769	-0.771623
	-0.367944	-1.65925	-0.239411	-0.753334
	-0.381935	-1.68759	-0.241053	-0.731281
	-0.406378	-1.71233	-0.240268	-0.709563
	-0.432678	-1.72955	-0.212758	-0.715106
	-0.450885	-1.73108	-0.16788	-0.746417
	-0.456567	-1.71592	-0.141357	-0.77105
	-0.442708	-1.69275	-0.155799	-0.773089
	-0.416379	-1.66876	-0.193853	-0.746038
	-0.395946	-1.64697	-0.220847	-0.687148
	-0.385261	-1.63461	-0.224553	-0.623987
	-0.375362	-1.63765	-0.215122	-0.595916
	-0.367405	-1.65341	-0.211626	-0.60159
	-0.377919	-1.67935	-0.227785	-0.609707
	-0.414804	-1.7104	-0.249051	-0.603567
	-0.465085	-1.73515	-0.24637	-0.583403
	-0.504615	-1.75008	-0.222309	-0.550986
	-0.520653	-1.76276	-0.211924	-0.522001
	-0.520501	-1.78007	-0.229829	-0.517866
	-0.529119	-1.79109	-0.260168	-0.530875
	-0.550951	-1.78613	-0.284707	-0.53798
	-0.553881	-1.76567	-0.289357	-0.535259
	-0.516657	-1.73564	-0.270162	-0.528958
	-0.471172	-1.70644	-0.248537	-0.514686
	-0.453306	-1.69421	-0.247351	-0.492159
	-0.465102	-1.7002	-0.25376	-0.473028
	-0.478139	-1.71159	-0.247652	-0.463456
	-0.467243	-1.72415	-0.238271	-0.463321
	-0.426559	-1.74437	-0.242797	-0.478054
	-0.386246	-1.77174	-0.261053	-0.498446
	-0.375891	-1.79782	-0.277929	-0.503156
	-0.396083	-1.81687	-0.271184	-0.492382
	-0.425336	-1.82335	-0.223693	-0.484965
	-0.438565	-1.81387	-0.157058	-0.481876
	-0.422889	-1.79633	-0.118645	-0.471974
	-0.390431	-1.78001	-0.130321	-0.466862
	-0.369828	-1.7669	-0.171679	-0.485078
	-0.368352	-1.75595	-0.206245	-0.521243
	-0.369297	-1.75121	-0.212962	-0.565125
	-0.363507	-1.75734	-0.199792	-0.603478
	-0.37004	-1.76575	-0.193704	-0.615821
	-0.402818	-1.76677	-0.208572	-0.606026
	-0.449713	-1.76085	-0.229625	-0.604847
	-0.484928	-1.75511	-0.234711	-0.616989
	-0.489592	-1.75711	-0.2221	-0.620743
	-0.464849	-1.77306	-0.212119	-0.620001
	-0.4381	-1.79719	-0.224775	-0.630757
	-0.435794	-1.81298	-0.257994	-0.643386
	-0.453094	-1.80717	-0.284631	-0.647758
	-0.467672	-1.78939	-0.284007	-0.653094
	-0.472088	-1.77862	-0.26826	-0.655719
	-0.46959	-1.78591	-0.265332	-0.646861
	-0.466551	-1.80507	-0.282219	-0.641432
[truncated: 5,501 more rows]
