# Supplementary material for: Stimulation of VTA dopamine inputs to LH upregulates orexin neuronal activity in a DRD2-dependent manner
Source: eLife. 2024 Apr 3;12:RP90158. doi: 10.7554/eLife.90158 (PMC10990487; doi:10.7554/eLife.90158)
Supplement: Figure 2—source data 1. [file elife-90158-fig2-data1.xlsx]

## Sheet: panel_C
-0.146101	0.207047	-0.200565	-0.043422
-0.157798	0.1836	-0.185884	0.00505612
-0.141182	0.174823	-0.166721	0.0542667
-0.11436	0.167362	-0.173183	0.0937065
-0.107466	0.172173	-0.205552	0.102041
-0.120901	0.171365	-0.223518	0.0687411
-0.130826	0.170113	-0.207066	0.0125038
-0.118437	0.152532	-0.174047	-0.0331741
-0.0779927	0.140155	-0.145026	-0.0477714
-0.0255891	0.137878	-0.132376	-0.0278819
0.00275206	0.142049	-0.146969	0.0104701
-0.0125055	0.155613	-0.173192	0.0360202
-0.049773	0.155821	-0.191136	0.0392157
-0.0734051	0.148476	-0.218188	0.038974
-0.071184	0.125432	-0.270739	0.0494757
-0.0624316	0.121409	-0.316363	0.0676187
-0.0724188	0.136994	-0.31653	0.0860876
-0.104283	0.160992	-0.278262	0.0958453
-0.136255	0.170772	-0.221412	0.0840872
-0.146983	0.159798	-0.168499	0.0588722
-0.137365	0.154339	-0.153165	0.0417108
-0.12465	0.151505	-0.171378	0.0343688
-0.11287	0.166602	-0.175965	0.0246276
-0.0903337	0.177273	-0.153361	0.0202946
-0.0483415	0.18788	-0.14337	0.0269645
0.0014439	0.191198	-0.168547	0.0296369
0.0379628	0.191559	-0.213004	0.0190722
0.042423	0.189787	-0.253351	-0.0023097
0.0192177	0.171872	-0.259557	-0.0416313
-0.00618779	0.150357	-0.218319	-0.095686
-0.0104634	0.121611	-0.163467	-0.132795
0.00172039	0.115911	-0.140313	-0.142503
0.00594046	0.122696	-0.1452	-0.145329
-0.00912855	0.141261	-0.149946	-0.143584
-0.0272499	0.155148	-0.147915	-0.12569
-0.0308497	0.153163	-0.145483	-0.0968025
-0.0220798	0.144334	-0.147025	-0.061843
-0.0112526	0.13076	-0.163152	-0.0182272
-0.010404	0.128733	-0.195872	0.0191846
-0.0224089	0.113084	-0.223172	0.0293003
-0.0274516	0.0987298	-0.229259	0.0202705
-0.00566873	0.0885291	-0.22591	0.0111779
0.0255453	0.0975205	-0.225229	0.000567045
0.0357411	0.120739	-0.222605	-0.0126111
0.0203542	0.140109	-0.210943	-0.0131333
-0.00559972	0.151841	-0.197051	0.00265231
-0.0227508	0.135184	-0.197483	0.0289067
-0.0179628	0.112616	-0.219257	0.0604735
-0.00253428	0.0857815	-0.248816	0.0869636
-0.0006912	0.080031	-0.254367	0.0905265
-0.0162265	0.0840894	-0.216627	0.0747594
-0.0282244	0.0857038	-0.157961	0.0594149
-0.0226288	0.0765594	-0.122329	0.0515444
-0.00139628	0.0495441	-0.124403	0.0518546
0.0205998	0.0352542	-0.139155	0.058718
0.0249346	0.0270081	-0.143076	0.0567617
0.00465123	0.0297652	-0.130738	0.0307589
-0.0160327	0.0153975	-0.105431	-0.0126709
-0.00944002	-0.00433681	-0.087827	-0.0507885
0.0131193	-0.0159792	-0.0897578	-0.0671151
0.0225118	-0.00510352	-0.0875246	-0.0614653
0.0116848	0.0276342	-0.0569054	-0.0404734
-0.00282945	0.0449623	-0.0191816	-0.0148772
-0.00215657	0.0530209	-0.00466262	-0.000681471
0.0168663	0.0458714	-0.0153529	-0.00414742
0.0311196	0.0440877	-0.0424464	-0.0165999
0.0126093	0.0341852	-0.0677385	-0.0295352
-0.0285639	0.0169273	-0.0658215	-0.0348712
-0.0554833	-0.0113612	-0.041795	-0.0218105
-0.0437051	-0.0485454	-0.0287819	0.00997556
0.00083082	-0.0627849	-0.02467	0.0350976
0.043688	-0.0592827	-0.00228261	0.0366669
0.0480435	-0.0417402	0.0291378	0.0224564
0.0102442	-0.0463703	0.0445164	0.00800656
-0.0309064	-0.0584398	0.0430223	0.00125236
-0.0398482	-0.0644936	0.0277114	0.00255635
-0.0227138	-0.0522965	-0.00192299	0.00317086
-0.0150643	-0.0264181	-0.0190628	-0.00319927
-0.0284585	-0.0130944	-0.00362749	8.04593e-05
-0.0391194	-0.0108011	0.0139755	0.0324125
-0.0208993	-0.0235116	0.00989281	0.0746332
0.0150183	-0.0116642	0.000798691	0.0905723
0.0299145	0.0162236	0.00262881	0.0797847
-0.000326066	0.0426337	0.0115355	0.0594524
-0.0536306	0.0363839	0.0296714	0.0378118
-0.084759	0.00241819	0.0513021	0.0279592
-0.0757237	-0.0204732	0.0558822	0.033937
-0.04954	-0.0286325	0.0519309	0.0343613
-0.0356199	-0.0289488	0.0719677	0.0213652
-0.0327011	-0.0617224	0.116899	0.0182774
-0.0200018	-0.1069	0.16007	0.0288309
0.00917109	-0.140417	0.193188	0.0340302
0.0354843	-0.127603	0.219615	0.0377925
0.0340608	-0.0745522	0.229191	0.0535382
-0.00768286	-0.020465	0.217626	0.0768713
-0.0692308	0.0152989	0.192284	0.0992668
-0.0981486	0.0117555	0.153026	0.116784
-0.0661145	-0.00834111	0.103742	0.112518
-0.00219572	-0.0459146	0.0703163	0.0816728
0.0506597	-0.0727081	0.071029	0.0524106
0.071779	-0.0874431	0.0913326	0.0512387
0.0663714	-0.0886573	0.109983	0.0639287
0.060055	-0.0796879	0.117383	0.0685812
0.0750738	-0.0690341	0.111196	0.0638439
0.0884577	-0.0408742	0.0955217	0.0542213
0.0660178	-0.0266919	0.0827274	0.0541007
0.0177457	-0.0336591	0.0788956	0.079893
-0.0152416	-0.0753619	0.0777264	0.116077
-0.00948036	-0.115415	0.0813786	0.126187
0.0211397	-0.132843	0.103607	0.103315
0.0389732	-0.123613	0.135282	0.0703098
0.0177983	-0.10006	0.145899	0.0410902
-0.0186623	-0.0976553	0.122093	0.0179153
-0.0206025	-0.104452	0.0826579	-0.00204437
0.0183693	-0.118524	0.0546948	-0.0257395
0.0480735	-0.111182	0.0639324	-0.0545148
0.0330911	-0.0979687	0.112791	-0.0778911
0.00219838	-0.0940381	0.159716	-0.0817314
0.00682735	-0.11561	0.16992	-0.0628193
0.0684345	-0.158993	0.163596	-0.0275205
0.149136	-0.189231	0.174095	0.0121071
0.172882	-0.200619	0.199456	0.0451443
0.10814	-0.173534	0.223268	0.0562999
0.0135235	-0.137674	0.226946	0.0426712
-0.0260982	-0.103988	0.188142	0.0111507
0.0140028	-0.0909618	0.12336	-0.0334609
0.0951344	-0.0940401	0.0897468	-0.0789825
0.150893	-0.1041	0.111336	-0.102146
0.144291	-0.129132	0.156594	-0.0927176
0.0993654	-0.15086	0.198483	-0.0683659
0.0608901	-0.171355	0.232562	-0.047194
0.0359929	-0.16821	0.249501	-0.0295412
0.00965025	-0.161429	0.257138	-0.0138701
-0.0182934	-0.152831	0.270247	-0.00195115
-0.0249373	-0.14975	0.275476	0.00313378
0.00808777	-0.147042	0.255624	-0.0108678
0.0607719	-0.127779	0.24026	-0.0549864
0.0874694	-0.106449	0.263308	-0.108583
0.0677186	-0.0911587	0.307651	-0.138165
0.0301389	-0.113677	0.342999	-0.14232
0.0192064	-0.15529	0.355825	-0.138532
0.0465054	-0.209182	0.338717	-0.127955
0.0775759	-0.250696	0.30166	-0.117136
0.0744536	-0.267545	0.277862	-0.123318
0.0519924	-0.266368	0.280912	-0.137506
0.0650095	-0.249649	0.285179	-0.147988
0.137206	-0.239253	0.278028	-0.163374
0.2241	-0.214484	0.274304	-0.178787
0.250609	-0.184629	0.279606	-0.168785
0.185358	-0.153697	0.28721	-0.136825
0.0731511	-0.153074	0.295093	-0.106065
0.00218533	-0.178921	0.295452	-0.0807068
0.0182484	-0.209144	0.276921	-0.0613942
0.0802543	-0.234867	0.253599	-0.0618227
0.113779	-0.239013	0.250489	-0.0785103
0.104215	-0.245105	0.263243	-0.0923279
0.0869331	-0.246316	0.266692	-0.10102
0.08895	-0.25467	0.256944	-0.113306
0.104995	-0.254907	0.252389	-0.128309
0.10252	-0.252853	0.267616	-0.141365
0.0584677	-0.251256	0.302441	-0.149388
0.00825947	-0.249725	0.338605	-0.14246
0.0170657	-0.259392	0.344071	-0.115422
0.0900691	-0.257515	0.30733	-0.0893853
0.167594	-0.256742	0.256527	-0.0790217
0.194371	-0.249401	0.226631	-0.0742849
0.163548	-0.251693	0.215745	-0.0707544
0.120942	-0.262931	0.202686	-0.0796223
0.124767	-0.287471	0.178883	-0.10632
0.178335	-0.319951	0.146726	-0.141749
0.218122	-0.327254	0.123768	-0.176637
0.190945	-0.310069	0.136108	-0.200196
0.112917	-0.268168	0.178773	-0.205477
0.0444845	-0.24192	0.211648	-0.191831
0.0289746	-0.228027	0.215792	-0.163994
0.0533128	-0.230077	0.210724	-0.125091
0.0680128	-0.240582	0.207184	-0.0852658
0.0387349	-0.248193	0.204396	-0.0653699
-0.00540589	-0.253052	0.203848	-0.0816194
-0.0116612	-0.239112	0.191896	-0.123673
0.0243957	-0.219695	0.154257	-0.164836
0.0573464	-0.180215	0.112373	-0.192967
0.0521404	-0.154922	0.0927279	-0.207258
0.01796	-0.159144	0.0819855	-0.21283
-0.00282642	-0.195558	0.069253	-0.226743
0.0219014	-0.239079	0.0705356	-0.250146
0.0710513	-0.263113	0.0878624	-0.259084
0.0946404	-0.283728	0.101558	-0.24036
0.0803877	-0.299692	0.109175	-0.211717
0.0611035	-0.326237	0.109896	-0.189585
0.0742777	-0.341159	0.0879528	-0.176766
0.121561	-0.345432	0.0571869	-0.173909
0.166155	-0.32668	0.0486423	-0.173128
0.173551	-0.293861	0.0569032	-0.163256
0.151989	-0.267965	0.0634465	-0.155762
0.136975	-0.244253	0.0761753	-0.170741
0.14606	-0.232279	0.0981578	-0.1916
0.153927	-0.217866	0.105852	-0.190586
0.11631	-0.222663	0.0967957	-0.172266
0.0358754	-0.241329	0.0858245	-0.155925
-0.0248444	-0.283121	0.0654684	-0.144927
-0.00892231	-0.334082	0.0292303	-0.144768
0.0678759	-0.371299	-0.00145923	-0.155062
0.136931	-0.385539	-0.00714749	-0.151567
0.141007	-0.362481	0.00327212	-0.133566
0.0926016	-0.33654	0.0168016	-0.138489
0.0536623	-0.316468	0.0262747	-0.177115
0.0652461	-0.322688	0.0273285	-0.223679
0.0959055	-0.336543	0.0302287	-0.258747
0.0845856	-0.347294	0.0542355	-0.274206
0.024066	-0.342613	0.0924511	-0.265254
-0.0267739	-0.324032	0.113575	-0.251841
-0.0118041	-0.324409	0.10764	-0.261529
0.0622857	-0.341298	0.0887107	-0.287205
0.13626	-0.378884	0.0769315	-0.301157
0.149063	-0.402114	0.0712802	-0.299677
0.0993629	-0.412848	0.0792244	-0.289889
0.0535807	-0.412775	0.0974476	-0.270008
0.0610914	-0.408428	0.112411	-0.241401
0.0952263	-0.397702	0.123115	-0.214596
0.1029	-0.363078	0.13599	-0.196046
0.074483	-0.326923	0.143973	-0.18404
0.0457041	-0.300059	0.140511	-0.184
0.0603479	-0.319055	0.137046	-0.190673
0.119551	-0.356513	0.143664	-0.187816
0.162678	-0.380092	0.150865	-0.173549
0.13815	-0.367549	0.14916	-0.1629
0.0720399	-0.336301	0.145983	-0.164093
0.0381802	-0.332986	0.143792	-0.174947
0.0692774	-0.362339	0.146001	-0.191325
0.133805	-0.413897	0.162023	-0.209315
0.170806	-0.427458	0.181146	-0.22794
0.148945	-0.396796	0.181606	-0.252274
0.100751	-0.326359	0.169823	-0.284028
0.0839494	-0.26487	0.165953	-0.306572
0.106702	-0.251082	0.161785	-0.294147
0.121221	-0.272572	0.149258	-0.248439
0.0960234	-0.307451	0.137625	-0.201829
0.0549548	-0.327541	0.124518	-0.185836
0.0396993	-0.357658	0.104914	-0.20745
0.0693787	-0.390148	0.101165	-0.255699
0.117057	-0.42858	0.126316	-0.301359
0.132834	-0.448833	0.153573	-0.32147
0.102727	-0.437173	0.165309	-0.331803
0.071163	-0.407694	0.171215	-0.351094
0.0812578	-0.373956	0.1707	-0.371068
0.123576	-0.362705	0.159801	-0.380355
0.149215	-0.346613	0.152644	-0.380082
0.119714	-0.322907	0.151177	-0.371021
0.0564722	-0.287639	0.13001	-0.364919
0.027327	-0.2703	0.0939044	-0.379896
0.071885	-0.272071	0.07289	-0.405326
0.151356	-0.277093	0.0692257	-0.407737
0.200215	-0.274885	0.0720727	-0.386192
0.195966	-0.246304	0.0847954	-0.37076
0.182948	-0.225981	0.101576	-0.374013
0.213014	-0.223382	0.102719	-0.392769
0.274804	-0.250025	0.09584	-0.429576
0.302025	-0.273333	0.10002	-0.476235
0.251663	-0.280573	0.102596	-0.51509
0.147772	-0.28134	0.088864	-0.544358
0.0645282	-0.29953	0.0742808	-0.564702
0.0586631	-0.355731	0.072655	-0.556302
0.10809	-0.407075	0.077916	-0.522807
0.137635	-0.430238	0.0884213	-0.499885
0.108467	-0.396638	0.104475	-0.500025
0.0548273	-0.336371	0.108412	-0.506855
0.0327876	-0.287056	0.0887433	-0.510846
0.0593588	-0.277092	0.061006	-0.503776
0.107057	-0.298704	0.0397355	-0.480809
0.13627	-0.314241	0.0233353	-0.464921
0.136853	-0.321068	0.0150761	-0.478804
0.140798	-0.306048	0.0164677	-0.503285
0.178097	-0.294853	0.0165592	-0.500293
0.223701	-0.276787	0.0134775	-0.466271
0.227673	-0.260568	0.0183877	-0.419274
0.189108	-0.249721	0.0255427	-0.377774
0.148084	-0.251118	0.0151581	-0.361603
0.142981	-0.277392	-0.00748963	-0.375996
0.182282	-0.305803	-0.0153641	-0.398359
0.230576	-0.32627	-0.000967917	-0.400868
0.236424	-0.311241	0.0244096	-0.381413
0.201163	-0.296668	0.0502202	-0.354162
0.168299	-0.296334	0.0646854	-0.329354
0.156312	-0.316894	0.056656	-0.315986
0.14775	-0.339793	0.028967	-0.312119
0.123975	-0.339226	-0.00525859	-0.309867
0.0862139	-0.327886	-0.042215	-0.311392
0.0614245	-0.315922	-0.0688638	-0.326698
0.083053	-0.331924	-0.0623574	-0.350202
0.143705	-0.347969	-0.0307759	-0.365984
0.185978	-0.346238	-0.00817441	-0.36635
0.169303	-0.3025	-0.00745864	-0.36214
0.110349	-0.24007	-0.0224244	-0.366478
0.0603394	-0.211111	-0.0502735	-0.378964
0.0490899	-0.222976	-0.0730292	-0.39475
0.0642624	-0.267693	-0.0654674	-0.403337
0.0681518	-0.299846	-0.0419054	-0.393089
0.0396191	-0.31894	-0.036327	-0.369939
0.00705722	-0.316934	-0.051311	-0.358139
0.0132141	-0.315084	-0.070759	-0.365671
0.0608912	-0.316116	-0.0940526	-0.380216
0.112754	-0.311902	-0.114692	-0.397425
0.140932	-0.303946	-0.124945	-0.413175
0.14347	-0.285857	-0.132719	-0.417691
0.142629	-0.293096	-0.133947	-0.417702
0.156258	-0.321553	-0.112859	-0.418701
0.176042	-0.367545	-0.0860433	-0.40611
0.178242	-0.396348	-0.0908123	-0.376807
0.159826	-0.40035	-0.116336	-0.354403
0.139759	-0.384702	-0.127075	-0.350084
0.13998	-0.362965	-0.12289	-0.354204
0.16144	-0.353624	-0.113471	-0.361503
0.179922	-0.32949	-0.092672	-0.370607
0.174525	-0.302025	-0.0691536	-0.365749
0.150375	-0.276207	-0.0650315	-0.34855
0.124576	-0.279417	-0.0768625	-0.341795
0.109819	-0.29888	-0.0904966	-0.345061
0.105141	-0.310627	-0.113155	-0.34073
0.0956209	-0.302675	-0.144063	-0.336136
0.0816617	-0.273199	-0.158576	-0.345315
0.0964529	-0.254273	-0.144377	-0.356543
0.159106	-0.24438	-0.114393	-0.363972
0.232102	-0.259499	-0.0802304	-0.374433
0.256045	-0.266669	-0.0568359	-0.378282
0.211371	-0.255957	-0.0687628	-0.371243
0.131924	-0.228181	-0.114878	-0.37462
0.0698914	-0.203812	-0.156357	-0.387606
0.0600175	-0.206508	-0.165849	-0.382012
0.0850488	-0.221258	-0.152654	-0.351204
0.0989235	-0.239796	-0.13568	-0.315322
0.0811693	-0.235694	-0.12835	-0.294163
0.0528838	-0.241964	-0.137522	-0.298052
0.0359055	-0.267621	-0.147684	-0.326076
0.0379611	-0.318094	-0.13973	-0.355411
0.0564776	-0.367697	-0.120761	-0.357566
0.0647322	-0.380434	-0.112578	-0.337528
0.0387162	-0.370896	-0.123094	-0.319393
0.00641259	-0.362979	-0.144614	-0.314468
0.0150896	-0.386841	-0.173562	-0.317179
0.0651716	-0.404487	-0.202864	-0.322508
0.113527	-0.402062	-0.224219	-0.321004
0.12092	-0.372941	-0.243997	-0.307331
0.0785535	-0.345866	-0.266839	-0.293692
0.0261953	-0.353188	-0.275549	-0.288805
0.0110454	-0.376319	-0.254536	-0.278308
0.0321542	-0.39409	-0.221101	-0.249571
0.0494513	-0.370983	-0.199029	-0.215726
0.0446953	-0.338539	-0.191028	-0.197211
0.0406163	-0.316007	-0.198958	-0.202239
0.062733	-0.324143	-0.215799	-0.22109
0.11239	-0.337205	-0.218569	-0.237029
0.161093	-0.334127	-0.199897	-0.238455
0.174455	-0.331662	-0.18122	-0.226725
0.145869	-0.333215	-0.170373	-0.216142
0.108931	-0.362219	-0.161436	-0.210125
0.0949836	-0.399993	-0.164488	-0.19654
0.102063	-0.445121	-0.184167	-0.175409
0.109221	-0.471255	-0.203933	-0.158749
0.106223	-0.479226	-0.218278	-0.149164
0.094766	-0.477273	-0.241004	-0.144733
0.0895072	-0.468405	-0.259263	-0.151812
0.0959312	-0.462174	-0.248532	-0.161105
0.0914674	-0.442546	-0.219528	-0.157399
0.0515291	-0.428796	-0.196505	-0.152406
-0.0133614	-0.408509	-0.191539	-0.164577
-0.0678399	-0.39339	-0.217713	-0.182139
-0.0827184	-0.385921	-0.278797	-0.186667
-0.0621422	-0.391715	-0.335511	-0.171495
-0.0358819	-0.402682	-0.344196	-0.130951
-0.0244411	-0.396794	-0.312686	-0.0739661
-0.0174033	-0.384907	-0.268556	-0.0337604
0.00603953	-0.356858	-0.2298	-0.0268298
0.0501131	-0.340581	-0.216093	-0.027648
0.0953631	-0.330706	-0.234733	-0.0195183
0.110772	-0.331885	-0.259303	-0.0138351
0.0898673	-0.331934	-0.263844	-0.0112889
0.0594335	-0.329549	-0.251973	-0.0065586
0.0416305	-0.340802	-0.231935	-0.0136975
0.0282852	-0.358028	-0.207267	-0.0375051
0.00695563	-0.38263	-0.201105	-0.061692
-0.0230553	-0.390712	-0.235265	-0.0814515
-0.0424153	-0.400774	-0.290114	-0.0973383
-0.0233809	-0.402508	-0.327255	-0.0927638
0.036084	-0.399156	-0.335302	-0.0696647
0.0898764	-0.392579	-0.323968	-0.0600702
0.0908421	-0.379624	-0.306127	-0.0740557
0.0436471	-0.37156	-0.294637	-0.0912004
-0.012783	-0.355652	-0.290179	-0.10399
-0.0481881	-0.345722	-0.275448	-0.112549
-0.0522275	-0.333151	-0.244975	-0.115967
-0.0415054	-0.343357	-0.219033	-0.118383
-0.044444	-0.371394	-0.208489	-0.130134
-0.0588201	-0.40552	-0.204511	-0.151028
-0.0524069	-0.432726	-0.204465	-0.172082
-0.0248571	-0.428873	-0.21379	-0.191572
-0.00843325	-0.413319	-0.229916	-0.207972
-0.0184394	-0.388403	-0.24196	-0.211601
-0.0427429	-0.377229	-0.241341	-0.197543
-0.0591686	-0.364598	-0.223322	-0.174011
-0.0455413	-0.358511	-0.192328	-0.148001
-0.00242086	-0.353322	-0.174052	-0.122465
0.0433946	-0.34961	-0.183113	-0.109791
0.0803489	-0.357745	-0.198563	-0.123056
0.117147	-0.364777	-0.1955	-0.156125
0.15598	-0.38387	-0.17569	-0.191937
0.18547	-0.388439	-0.14709	-0.221837
0.191511	-0.375989	-0.113195	-0.242278
0.163485	-0.336374	-0.0925393	-0.25085
0.110377	-0.292993	-0.0975816	-0.247333
0.0641529	-0.266253	-0.114186	-0.2299
0.0497854	-0.269518	-0.132421	-0.201247
0.0579194	-0.317218	-0.157862	-0.174226
0.0627121	-0.366718	-0.178388	-0.174467
0.0505251	-0.403175	-0.177896	-0.203162
0.0349379	-0.402426	-0.169329	-0.230101
0.0373928	-0.374536	-0.163937	-0.234096
0.0676908	-0.32209	-0.153187	-0.216172
0.102916	-0.269948	-0.14268	-0.179157
0.111867	-0.246311	-0.152146	-0.134771
0.0899994	-0.250832	-0.174396	-0.106505
0.0644727	-0.287398	-0.191096	-0.0936864
0.057848	-0.31866	-0.209273	-0.077553
0.0699954	-0.339961	-0.225147	-0.060748
0.0838717	-0.329314	-0.217523	-0.0505272
0.0816396	-0.299584	-0.189579	-0.0377743
0.0661414	-0.260811	-0.161058	-0.0295099
0.050736	-0.226833	-0.129954	-0.0438749
0.0406366	-0.214989	-0.0943281	-0.0717622
0.027741	-0.216926	-0.0750666	-0.0964084
0.00296894	-0.237622	-0.0720726	-0.11981
-0.0316154	-0.24867	-0.0576919	-0.137547
-0.0519616	-0.259208	-0.0280461	-0.131962
-0.0445529	-0.267138	-7.78238e-05	-0.108831
-0.0258718	-0.28441	0.0240377	-0.0910595
-0.0156479	-0.30314	0.0475001	-0.0782007
-0.0120205	-0.297896	0.0644407	-0.0652703
-0.00817975	-0.275966	0.0784211	-0.0628134
-0.00149282	-0.245927	0.0947621	-0.0696245
0.00859833	-0.24192	0.0998815	-0.0724407
0.0099768	-0.252252	0.0848657	-0.0821065
-0.00746439	-0.277045	0.0715395	-0.109605
-0.0263087	-0.288774	0.0783532	-0.136588
-0.0275241	-0.281118	0.0937735	-0.144553
-0.0147423	-0.268481	0.105471	-0.138965
-0.00588754	-0.250069	0.114715	-0.122085
-0.0105047	-0.238662	0.122285	-0.0907079
-0.032071	-0.21652	0.129855	-0.0554327
-0.0571539	-0.203118	0.147107	-0.0226924
-0.0553986	-0.193154	0.173765	0.0107001
-0.0184051	-0.199369	0.193183	0.0415252
0.0249485	-0.208765	0.197539	0.0604329
0.0448456	-0.215735	0.193244	0.0646572
0.0357004	-0.224685	0.181125	0.0607475
0.00185645	-0.217796	0.167549	0.0498561
-0.0369788	-0.216699	0.168574	0.0361512
-0.0540541	-0.222579	0.189681	0.0348947
-0.0526364	-0.247913	0.214061	0.0552169
-0.0552452	-0.263678	0.227051	0.0842228
-0.0644958	-0.258813	0.227067	0.102135
-0.0722578	-0.23179	0.208154	0.0972534
-0.0799125	-0.199986	0.173468	0.0631818
-0.0870394	-0.201348	0.148287	0.0119708
-0.0923788	-0.22427	0.147247	-0.0285487
-0.100943	-0.263047	0.155833	-0.0345208
-0.102145	-0.277438	0.162217	-0.0100322
-0.0801788	-0.274926	0.167331	0.023993
-0.0401906	-0.270526	0.166219	0.0446888
-0.0112782	-0.278618	0.163352	0.0386121
-0.0103541	-0.289696	0.173757	0.0147647
-0.0311725	-0.279507	0.190253	-0.00426545
-0.0464859	-0.26436	0.192265	-0.00944257
-0.0317211	-0.237453	0.188571	-0.017381
0.006226	-0.223143	0.196987	-0.0377932
0.0259771	-0.212738	0.204569	-0.0560627
-4.54367e-05	-0.210125	0.20573	-0.0638847
-0.0481858	-0.207748	0.216229	-0.0615717
-0.0719324	-0.208118	0.234029	-0.0415162
-0.0488319	-0.21945	0.239294	-0.00488365
-0.00386291	-0.219358	0.234717	0.0321998
0.0217361	-0.210309	0.233147	0.0683662
0.01504	-0.190438	0.224494	0.104361
-0.000907749	-0.201842	0.211391	0.119176
-0.00637002	-0.240224	0.211347	0.104723
-0.00493402	-0.284041	0.213882	0.084046
-0.0118778	-0.302955	0.201155	0.0677575
-0.0355214	-0.280932	0.186934	0.0474873
-0.0698896	-0.251731	0.18745	0.0308258
-0.0957192	-0.239879	0.191028	0.0176576
-0.103509	-0.270044	0.193536	-0.0100155
-0.0971281	-0.299289	0.20232	-0.049486
-0.087174	-0.309155	0.204725	-0.0758866
-0.0864481	-0.291505	0.191996	-0.082175
-0.0938174	-0.270657	0.18242	-0.0695008
-0.0818963	-0.267909	0.18228	-0.0270452
-0.0415593	-0.26852	0.178266	0.0339283
-0.00390125	-0.267485	0.175531	0.0735595
0.00114192	-0.24455	0.1841	0.0794627
-0.0162309	-0.23023	0.187037	0.069572
-0.0297847	-0.231396	0.168544	0.0519965
-0.0230477	-0.257313	0.148122	0.0346478
0.00494552	-0.272995	0.151081	0.0334362
0.0290035	-0.25554	0.176535	0.0417949
0.0201751	-0.22517	0.207749	0.0366506
-0.0173774	-0.205394	0.224702	0.0163067
-0.0489132	-0.227474	0.210201	-0.00100978
-0.0550134	-0.258092	0.171629	-0.00489101
-0.041783	-0.279595	0.133611	0.00660971
-0.019851	-0.273532	0.107098	0.0218237
-0.000337309	-0.265284	0.0837652	0.0168357
0.0148867	-0.277938	0.0640453	-0.0150953
0.0426128	-0.311678	0.0585523	-0.0518644
0.0866567	-0.356595	0.0709893	-0.0644151
0.115703	-0.371038	0.104805	-0.0508208
0.107348	-0.36553	0.1633	-0.0317017
0.0778172	-0.345374	0.23098	-0.0274478
0.0529967	-0.344749	0.279456	-0.0434048
0.0479671	-0.36183	0.296201	-0.0732382
0.0533477	-0.382162	0.288059	-0.0990613
0.0411635	-0.385473	0.259234	-0.10724
-0.00600509	-0.358963	0.22258	-0.102014
-0.0624804	-0.335822	0.205005	-0.0896953
-0.0925585	-0.322029	0.212904	-0.0644524
-0.0906588	-0.335163	0.228774	-0.0200836
-0.0794695	-0.335177	0.246475	0.0335199
-0.0831222	-0.312023	0.267622	0.0852608
-0.100173	-0.278583	0.2788	0.138679
-0.101719	-0.258463	0.281868	0.202151
-0.0664799	-0.256913	0.294886	0.287984
-0.015266	-0.245747	0.311062	0.403286
0.00931348	-0.230915	0.30781	0.535191
-0.00840039	-0.204006	0.289207	0.655688
-0.0384219	-0.193628	0.270504	0.759149
-0.0364944	-0.19223	0.25199	0.860786
0.0115304	-0.184984	0.245929	0.957075
0.0767395	-0.152937	0.264967	1.03252
0.116248	-0.0995457	0.285799	1.08289
0.115222	-0.067901	0.282154	1.10452
0.0991533	-0.0669233	0.268149	1.10693
0.100156	-0.100901	0.266364	1.13844
0.127831	-0.128073	0.271447	1.2288
0.155029	-0.146256	0.283031	1.34741
0.151175	-0.149153	0.302258	1.45014
0.122132	-0.147534	0.306333	1.52138
0.108601	-0.147052	0.282811	1.55975
0.134754	-0.124043	0.255105	1.5829
0.186402	-0.081291	0.243284	1.63161
0.224746	-0.0213582	0.245082	1.72139
0.225509	0.0198194	0.26894	1.8355
0.209872	0.0619397	0.32093	1.97766
0.225128	0.120445	0.380248	2.16409
0.276876	0.208307	0.433338	2.38175
0.327755	0.304056	0.494836	2.60632
0.361494	0.378949	0.568982	2.83503
0.394826	0.439407	0.634162	3.06264
0.445115	0.478941	0.679253	3.27321
0.511004	0.529359	0.712162	3.46952
0.573674	0.60097	0.739868	3.66223
0.606303	0.706056	0.769973	3.84405
0.608737	0.81798	0.809261	4.01762
0.617658	0.920307	0.856236	4.20144
0.654453	1.01713	0.910275	4.39462
0.700053	1.10715	0.983385	4.58228
0.733281	1.2077	1.07796	4.76277
0.750703	1.29429	1.1726	4.94383
0.763392	1.38081	1.25154	5.12265
0.795948	1.46736	1.3221	5.29625
0.868074	1.57289	1.39427	5.46345
0.958524	1.69774	1.46933	5.61628
1.02973	1.82153	1.54965	5.75145
1.0765	1.91702	1.64124	5.88273
1.12856	1.95755	1.73576	6.02572
1.20241	1.9888	1.82587	6.17659
1.28638	2.03211	1.91842	6.32048
1.3463	2.11401	2.00836	6.45164
1.35793	2.21286	2.07976	6.56905
1.34962	2.31504	2.13368	6.66954
1.37572	2.41795	2.18704	6.75862
1.44769	2.52053	2.24386	6.84935
1.5235	2.62987	2.30911	6.94332
1.56195	2.71837	2.39216	7.04051
1.56192	2.79286	2.47823	7.14284
1.55588	2.84791	2.54408	7.24198
1.57672	2.91516	2.59287	7.32182
1.61865	2.99645	2.63542	7.38601
1.64437	3.07245	2.66484	7.45683
1.63267	3.13246	2.68604	7.53992
1.60414	3.16674	2.71634	7.62814
1.5985	3.20525	2.75246	7.71469
1.62961	3.25776	2.79195	7.78664
1.67757	3.34834	2.8538	7.83672
1.71221	3.44398	2.94065	7.8856
1.73057	3.52635	3.02051	7.95532
1.75727	3.58556	3.0837	8.03742
1.81268	3.62612	3.14522	8.11716
1.8726	3.65972	3.1969	8.18953
1.89293	3.66074	3.22626	8.23591
1.85982	3.63877	3.24169	8.24475
1.81111	3.60817	3.24574	8.24417
1.79878	3.62179	3.23143	8.25629
1.83521	3.68361	3.22122	8.26678
1.88522	3.77857	3.24011	8.26955
1.90734	3.86814	3.26808	8.27797
1.88986	3.92003	3.27956	8.29659
1.85691	3.95558	3.28181	8.32772
1.84749	3.9855	3.28267	8.38348
1.869	4.02918	3.27808	8.4469
1.88511	4.06062	3.27739	8.48363
1.86493	4.07931	3.28665	8.49977
1.82449	4.08786	3.28915	8.52327
1.80272	4.10788	3.28181	8.55199
1.82186	4.15214	3.28362	8.57388
1.87011	4.19913	3.2964	8.59321
1.90215	4.24284	3.30399	8.60611
1.88433	4.2527	3.30672	8.60562
1.84289	4.25477	3.31391	8.60336
1.82877	4.26054	3.32473	8.60773
1.85199	4.27997	3.33857	8.60065
1.87691	4.2934	3.35547	8.57484
1.87351	4.29749	3.36644	8.54458
1.83914	4.31854	3.36668	8.5154
1.80306	4.35563	3.36593	8.49026
1.80069	4.40935	3.3695	8.47931
1.83239	4.42759	3.36097	8.48111
1.85695	4.4021	3.33058	8.47674
1.85287	4.34033	3.29332	8.45525
1.84358	4.2852	3.26683	8.42373
1.85231	4.26603	3.25962	8.38804
1.87313	4.275	3.27421	8.35245
1.88256	4.29904	3.3034	8.3258
1.86367	4.31025	3.32363	8.31369
1.82903	4.33249	3.32181	8.304
1.82104	4.36367	3.3063	8.28098
1.86074	4.41005	3.28129	8.24381
1.91164	4.44569	3.24775	8.20243
1.93125	4.45502	3.21986	8.16483
1.91573	4.44941	3.20237	8.14282
1.8961	4.43885	3.17447	8.14576
1.90592	4.45605	3.12696	8.15648
1.94526	4.48356	3.0784	8.15503
1.97282	4.51115	3.0402	8.13893
1.94767	4.51034	3.01647	8.11114
1.8857	4.50172	3.01666	8.07468
1.84227	4.4935	3.03327	8.04141
1.85335	4.47704	3.03899	8.01665
1.89719	4.4619	3.03401	7.98404
1.92314	4.44414	3.03468	7.94124
1.90219	4.44381	3.02865	7.9096
1.85816	4.45008	3.00522	7.89343
1.83287	4.46919	2.98305	7.88067
1.83432	4.47573	2.97104	7.87027
1.82561	4.46778	2.95346	7.86029
1.77865	4.45173	2.93613	7.83991
1.71691	4.43259	2.93454	7.82081
1.68831	4.43261	2.93468	7.81833
1.70615	4.43858	2.92483	7.80892
1.73659	4.45975	2.91558	7.7609
1.73624	4.48174	2.90216	7.68423
1.6977	4.51213	2.86763	7.60041
1.65556	4.53888	2.82079	7.52365
1.6481	4.55412	2.77527	7.47916
1.68011	4.55172	2.72494	7.47447
1.71616	4.52017	2.68047	7.47907
1.72247	4.49188	2.66564	7.47324
1.70618	4.47027	2.66943	7.47431
1.69161	4.46751	2.66211	7.48748
1.68415	4.45324	2.64515	7.49428
1.68407	4.42676	2.63281	7.48842
1.68685	4.39824	2.62352	7.47132
1.67352	4.38572	2.61668	7.43846
1.64211	4.39728	2.61422	7.40403
1.62659	4.4054	2.60265	7.38714
1.63741	4.4087	2.5731	7.37228
1.65179	4.3824	2.54115	7.3344
1.65755	4.35079	2.52438	7.27902
1.65934	4.32409	2.51992	7.22556
1.66044	4.31212	2.51944	7.17787
1.65969	4.30667	2.51839	7.13579
1.64995	4.29679	2.51526	7.10096
1.61678	4.29587	2.5144	7.0604
1.56491	4.29024	2.519	7.00613
1.52804	4.28414	2.51914	6.94699
1.52553	4.25191	2.49581	6.89198
1.53911	4.21253	2.45083	6.83884
1.53821	4.17903	2.40981	6.78847
1.51113	4.16172	2.38745	6.75432
1.46791	4.16305	2.37992	6.74556
1.44275	4.15693	2.38183	6.75613
1.46661	4.14205	2.38756	6.76637
1.52924	4.10988	2.3842	6.75502
1.59103	4.10013	2.36507	6.71164
1.62691	4.11426	2.33663	6.6478
1.64331	4.15298	2.29964	6.58437
1.65675	4.18461	2.25887	6.52669
1.67918	4.17994	2.23305	6.46515
1.69469	4.15193	2.23069	6.4012
1.67333	4.11351	2.23709	6.34981
1.61746	4.10367	2.24548	6.31279
1.57114	4.11165	2.26008	6.2838
1.56666	4.13178	2.26678	6.25586
1.59119	4.14377	2.25337	6.21582
1.60154	4.16199	2.23247	6.16144
1.57067	4.18298	2.21066	6.10986
1.51564	4.17154	2.17704	6.06991
1.47748	4.12442	2.14491	6.0227
1.47382	4.04496	2.13858	5.96197
1.48519	3.98201	2.14573	5.90546
1.48047	3.95341	2.14855	5.86141
1.45378	3.97401	2.14739	5.82717
1.42703	4.00954	2.13379	5.80497
1.41807	4.02488	2.09794	5.7848
1.41858	4.01569	2.06144	5.75282
1.40902	3.99258	2.04965	5.72654
1.38335	3.98522	2.05161	5.7284
1.35396	3.96891	2.05673	5.74458
1.34365	3.94641	2.06704	5.74952
1.36416	3.90614	2.0702	5.7396
1.40001	3.87338	2.06083	5.71154
1.42162	3.89189	2.06992	5.6731
1.42799	4.01814	2.12918	5.6844
1.45162	4.28069	2.2371	5.82474
1.51535	4.63748	2.39741	6.13311
1.6029	5.03676	2.62728	6.59947
1.68469	5.39766	2.90903	7.16052
1.73933	5.70791	3.19274	7.70398
1.77431	5.99008	3.44823	8.15388
1.82904	6.3191	3.67987	8.55674
1.92817	6.75873	3.91794	9.03216
2.0509	7.30496	4.21459	9.65718
2.17082	7.8928	4.58969	10.4159
2.28976	8.42132	4.9927	11.2056
2.40938	8.87942	5.35925	11.8887
2.52177	9.30472	5.67867	12.4189
2.63135	9.79881	5.98712	12.9005
2.73799	10.3971	6.32745	13.4826
2.83055	11.0382	6.72267	14.2092
2.90626	11.6121	7.14086	14.9892
2.97896	12.0437	7.50652	15.6804
3.0595	12.3939	7.77622	16.1941
3.15492	12.772	7.98555	16.5779
3.26667	13.2828	8.21324	16.985
3.38213	13.8808	8.51136	17.5295
3.48873	14.4567	8.86727	18.1844
3.5954	14.9143	9.22655	18.8232
3.72016	15.2637	9.53027	19.3402
3.85648	15.6141	9.76315	19.7366
3.99292	16.0419	9.96271	20.1272
4.12684	16.5608	10.1746	20.647
4.25472	17.0786	10.4174	21.3183
4.36808	17.525	10.6888	22.0204
4.46269	17.8706	10.9733	22.6164
4.53814	18.1874	11.2349	23.0767
4.60263	18.5613	11.4579	23.4784
4.68023	19.0081	11.6734	23.9346
4.78356	19.4897	11.9116	24.5025
4.89068	19.9224	12.1626	25.1285
4.97559	20.2967	12.404	25.6892
5.03409	20.6336	12.6207	26.1292
5.08535	20.9867	12.7982	26.5121
5.15151	21.3711	12.9564	26.9383
5.24349	21.7873	13.1471	27.4729
5.35076	22.2154	13.3853	28.1044
5.45183	22.6156	13.6374	28.7336
5.5308	22.9928	13.8772	29.2472
5.58847	23.3426	14.0905	29.6393
5.63822	23.7008	14.2602	30.0079
5.6927	24.0697	14.4161	30.4405
5.75726	24.4427	14.6113	30.9588
5.8257	24.7826	14.8365	31.5248
5.89247	25.0717	15.0336	32.0443
5.96277	25.3425	15.1797	32.4488
6.04926	25.6416	15.2982	32.794
6.14777	26.0215	15.4279	33.1934
6.23354	26.4381	15.6187	33.6882
6.28807	26.8365	15.8837	34.2387
6.32547	27.1635	16.1586	34.7706
6.37189	27.4299	16.3758	35.2013
6.43934	27.6929	16.542	35.5156
6.52158	28.003	16.7011	35.8193
6.60283	28.3612	16.8753	36.218
6.66554	28.7001	17.0753	36.7036
6.70761	29.0011	17.2961	37.2008
6.75039	29.2713	17.4742	37.651
6.80846	29.5812	17.6525	38.0183
6.87945	29.9648	17.7914	38.3516
6.96509	30.4047	17.931	38.7599
7.05848	30.8436	18.0863	39.2752
7.13949	31.2143	18.2559	39.801
7.19788	31.518	18.4225	40.2307
7.24451	31.7864	18.5611	40.5458
7.28395	32.0905	18.6813	40.8091
7.31735	32.4265	18.8275	41.1372
7.36144	32.7756	19.02	41.6068
7.42579	33.0964	19.2331	42.1545
7.50119	33.3715	19.4336	42.6347
7.57374	33.6344	19.603	42.9787
7.63193	33.9127	19.734	43.2499
7.66675	34.2408	19.8436	43.5539
7.69329	34.5938	19.9712	43.9575
7.74033	34.9478	20.1392	44.4299
7.80702	35.2592	20.3282	44.9224
7.8646	35.5349	20.5026	45.2993
7.90012	35.7964	20.6444	45.5775
7.92635	36.0605	20.754	45.8553
7.96248	36.3589	20.8622	46.213
8.01863	36.6669	21.0098	46.6598
8.07762	36.9621	21.1873	47.1455
8.1019	37.2095	21.3399	47.5826
8.08914	37.4429	21.4443	47.905
8.08337	37.7062	21.531	48.1503
8.12696	38.0317	21.6386	48.421
8.21438	38.3988	21.8025	48.763
8.30164	38.7349	22.0313	49.1471
8.34361	39.0134	22.2657	49.5211
8.34211	39.2297	22.4294	49.8422
8.34847	39.4505	22.5236	50.1138
8.40526	39.7026	22.6088	50.4214
8.49906	39.9772	22.7257	50.8458
8.57994	40.2323	22.8893	51.3484
8.62057	40.4506	23.0836	51.8232
8.63664	40.6535	23.2526	52.2033
8.66349	40.8748	23.3637	52.4812
8.71615	41.1698	23.4632	52.712
8.77626	41.5064	23.6042	53.0027
8.81355	41.8362	23.7679	53.4041
8.82114	42.1022	23.8218	53.8419
8.82585	42.3103	23.9559	54.2212
8.85495	42.5135	24.0813	54.5271
8.90086	42.7606	24.1896	54.7968
8.93855	43.0703	24.3183	55.0915
8.96242	43.4035	24.4832	55.4772
8.99799	43.741	24.6481	55.9238
9.06677	44.0415	24.7955	56.3054
9.15054	44.3258	24.93	56.5702
9.19766	44.6217	25.0321	56.7989
9.1732	44.9378	25.1016	57.0883
9.10695	45.2564	25.1884	57.4821
9.08079	45.545	25.3263	57.9645
9.13742	45.8014	25.4973	58.428
9.23671	46.0255	25.6748	58.7434
9.31612	46.2723	25.8353	58.9192
9.3634	46.5534	25.9527	59.0825
9.40558	46.8755	26.0385	59.3183
9.4662	47.207	26.1394	59.6348
9.54144	47.5133	26.2677	59.9992
9.58979	47.788	26.3902	60.3359
9.57978	48.0291	26.4833	60.5894
9.54008	48.2741	26.5509	60.8142
9.53465	48.5351	26.6204	61.1081
9.59533	48.8242	26.7424	61.4771
9.70104	49.093	26.9377	61.8637
9.79888	49.3176	27.153	62.2196
9.84337	49.5054	27.3037	62.5055
9.84285	49.6903	27.3632	62.7237
9.84997	49.9265	27.3811	62.95
9.89278	50.2006	27.4226	63.2586
9.9395	50.4829	27.5212	63.6356
9.95043	50.7216	27.6626	64.0183
9.92915	50.93	27.799	64.3608
9.90972	51.1371	27.897	64.6369
9.92488	51.3895	27.9766	64.8592
9.97409	51.6913	28.0856	65.0964
10.0228	51.981	28.2268	65.3937
10.0366	52.2264	28.3633	65.6982
10.0266	52.409	28.4722	65.9433
10.0305	52.5843	28.5492	66.1385
10.0628	52.7904	28.6134	66.3456
10.1038	53.0523	28.7117	66.6216
10.1217	53.3374	28.868	66.9929
10.1115	53.6045	29.0399	67.4056
10.114	53.8527	29.1815	67.7307
10.1687	54.0932	29.2894	67.9105
10.2536	54.3553	29.3638	68.0234
10.3085	54.6052	29.413	68.1803
10.3094	54.8324	29.4851	68.4373
10.2982	55.0221	29.6101	68.7892
10.3272	55.1875	29.7519	69.162
10.3858	55.3659	29.8781	69.4511
10.4162	55.596	29.9877	69.649
10.3911	55.8908	30.07	69.8525
10.345	56.2062	30.1312	70.1151
10.3321	56.5268	30.2197	70.4094
10.3684	56.8023	30.3514	70.6996
10.4185	57.0196	30.4766	70.9441
10.4353	57.1853	30.565	71.1079
10.4202	57.338	30.6254	71.2486
10.419	57.5175	30.6676	71.4727
10.4689	57.7234	30.7272	71.791
10.5569	57.9461	30.8507	72.1347
10.6312	58.1549	31.0158	72.4557
10.6392	58.3766	31.1486	72.7128
10.5843	58.626	31.2273	72.8811
10.5386	58.9277	31.2897	73.0264
10.5729	59.2498	31.3676	73.2294
10.6711	59.5284	31.4813	73.4686
10.7535	59.7388	31.6289	73.6811
10.7738	59.8992	31.7567	73.857
10.7503	60.0742	31.8141	74.0052
10.7302	60.2848	31.8316	74.1402
10.7424	60.5343	31.8772	74.3246
10.7744	60.766	31.9716	74.5965
10.7888	60.963	32.0972	74.8887
10.7788	61.1458	32.2282	75.1225
10.7861	61.3421	32.3351	75.3012
10.8401	61.5812	32.4144	75.4587
10.9185	61.8315	32.5119	75.6391
10.9779	62.0693	32.6634	75.8998
10.9923	62.2723	32.8394	76.2311
10.9714	62.478	32.9888	76.5257
10.9586	62.7003	33.0856	76.7151
10.9918	62.9489	33.1309	76.8542
11.0527	63.218	33.149	77.0271
11.0982	63.4743	33.1738	77.2787
11.1193	63.7107	33.2229	77.6023
11.1428	63.9016	33.2848	77.9221
11.1842	64.0699	33.3564	78.1318
11.231	64.2364	33.4474	78.2225
11.2541	64.4463	33.5453	78.309
11.2339	64.7058	33.6323	78.4926
11.1968	64.9937	33.7159	78.7727
11.1962	65.2725	33.8065	79.0927
11.2468	65.4998	33.8853	79.3793
11.3031	65.7164	33.946	79.5787
11.3169	65.947	34.012	79.7355
11.2905	66.2071	34.0901	79.947
11.2639	66.4475	34.1775	80.2238
11.2806	66.6259	34.2898	80.4943
11.3471	66.7382	34.4187	80.7129
11.4164	66.8349	34.5097	80.8744
11.4419	66.996	34.5371	80.9805
11.4404	67.2303	34.5341	81.0843
11.4655	67.5147	34.5429	81.2557
11.5314	67.7724	34.5993	81.4771
11.5971	67.9876	34.7198	81.6775
11.6122	68.174	34.8611	81.8399
11.5708	68.3661	34.9472	81.9848
11.5194	68.5911	34.9764	82.1209
11.5169	68.8409	35.0066	82.2843
11.5661	69.0935	35.0594	82.5049
11.6117	69.2991	35.1231	82.722
11.6072	69.4733	35.1896	82.8569
11.5689	69.6275	35.2404	82.9317
11.552	69.8046	35.2629	83.0118
11.5861	70.0313	35.2984	83.1468
11.6476	70.3048	35.3886	83.3921
11.6857	70.6073	35.501	83.7353
11.6713	70.8936	35.5944	84.043
11.6299	71.1478	35.6697	84.2163
11.6181	71.3501	35.7258	84.3111
11.6525	71.5248	35.7581	84.4264
11.6952	71.671	35.7982	84.6051
11.7107	71.8072	35.8698	84.8547
11.7094	71.9394	35.9456	85.1205
11.723	72.0612	36.0066	85.2952
11.7657	72.2008	36.0646	85.3668
11.8224	72.3722	36.1153	85.4546
11.854	72.5873	36.1458	85.6362
11.8421	72.8011	36.1736	85.8787
11.8239	72.9912	36.213	86.1258
11.84	73.1392	36.2522	86.3287
11.8769	73.2843	36.2912	86.4453
11.8929	73.4725	36.3435	86.5192
11.883	73.6912	36.4021	86.6534
11.875	73.9176	36.4618	86.8577
11.8973	74.1023	36.5373	87.0613
11.9462	74.2587	36.6263	87.222
11.9783	74.416	36.694	87.3341
11.9542	74.6222	36.7249	87.4063
11.9003	74.8609	36.7403	87.5057
11.8857	75.0884	36.7664	87.7055
11.9332	75.2834	36.8217	87.9656
11.999	75.4433	36.9075	88.179
12.025	75.6213	36.9959	88.3018
11.9958	75.8286	37.0423	88.3578
11.95	76.0712	37.0426	88.3957
11.95	76.3099	37.0468	88.4966
12.0157	76.5245	37.091	88.7152
12.0937	76.7173	37.1745	88.9954
12.1216	76.9064	37.2788	89.236
12.0931	77.1029	37.3694	89.4125
12.0563	77.2739	37.4124	89.5645
12.0653	77.4385	37.4324	89.7228
12.125	77.5964	37.4878	89.9246
12.1819	77.7663	37.5769	90.1751
12.1835	77.9461	37.657	90.3935
12.1467	78.1299	37.7126	90.5103
12.1312	78.3047	37.7412	90.569
12.1678	78.4555	37.7419	90.6529
12.2337	78.5981	37.7493	90.7886
12.2903	78.7215	37.7928	90.9728
12.3162	78.8468	37.8422	91.1739
12.3186	78.9798	37.873	91.3129
12.322	79.1579	37.9085	91.3699
12.3368	79.3939	37.9585	91.4463
12.3457	79.6579	38.0005	91.6202
12.3329	79.8968	38.04	91.8553
12.3169	80.054	38.0926	92.0886
12.3364	80.1505	38.1416	92.28
12.4023	80.2374	38.1905	92.3879
12.4813	80.3977	38.2627	92.4363
12.5204	80.6299	38.3349	92.5336
12.4945	80.8844	38.3686	92.7158
12.4307	81.1015	38.3864	92.9074
12.3823	81.2677	38.4251	93.0624
12.3779	81.4374	38.4715	93.1759
12.4042	81.631	38.5119	93.2345
12.4358	81.8446	38.5515	93.2857
12.4639	82.0273	38.5811	93.4291
12.4869	82.167	38.6035	93.6644
12.4985	82.2693	38.6558	93.9047
12.5002	82.3888	38.7396	94.109
12.4959	82.5653	38.7964	94.2651
12.4871	82.7723	38.7931	94.3433
12.4809	82.9833	38.763	94.3858
12.4919	83.1618	38.7524	94.4802
12.5082	83.3233	38.7871	94.6104
12.5003	83.4786	38.8653	94.6976
12.4646	83.6559	38.9446	94.7326
12.4268	83.8386	38.9793	94.7583
12.4186	84.0089	38.9898	94.8013
12.4591	84.175	39.0289	94.9012
12.5323	84.339	39.0993	95.0715
12.5872	84.5235	39.1595	95.2221
12.5961	84.7008	39.1861	95.2622
12.5897	84.8679	39.1867	95.2251
12.609	85.0224	39.1816	95.1973
12.6494	85.1912	39.2047	95.2338
12.6747	85.3755	39.2739	95.3678
12.6673	85.5544	39.3541	95.5813
12.6461	85.7295	39.3969	95.7658
12.6555	85.9094	39.3961	95.8366
12.7181	86.145	39.3768	95.8369
12.7968	86.4137	39.3603	95.8517
12.8333	86.6647	39.3654	95.8998
12.8156	86.8278	39.3989	95.9695
12.7792	86.8942	39.4326	96.0446
12.7593	86.9321	39.4561	96.09
12.7699	87.032	39.5065	96.1209
12.7958	87.2422	39.5997	96.2224
12.8029	87.4926	39.6991	96.4247
12.7807	87.7308	39.7804	96.642
12.7581	87.9239	39.8478	96.7963
12.7664	88.1079	39.8863	96.8772
12.8097	88.3229	39.8873	96.8954
12.8701	88.5613	39.8689	96.9103
12.9233	88.768	39.8354	97.0158
12.9508	88.8792	39.7941	97.2125
12.9561	88.9361	39.8048	97.4012
12.9584	89.0004	39.9006	97.5297
12.9648	89.1353	40.0051	97.6237
12.9662	89.3162	40.0426	97.6996
12.9672	89.4967	40.0333	97.7887
12.9798	89.6387	40.0342	97.9358
13.0026	89.7432	40.0786	98.091
13.0221	89.8642	40.1782	98.1487
13.0269	90.0183	40.2925	98.1188
13.0118	90.203	40.3374	98.1031
12.984	90.3765	40.3058	98.1683
12.9696	90.5433	40.2763	98.3471
12.9907	90.6983	40.2898	98.6334
13.0325	90.8363	40.3254	98.9041
13.0504	90.9426	40.3591	99.0254
13.0247	91.0037	40.3682	99.0295
12.9842	91.0709	40.3431	99.0222
12.9751	91.186	40.3305	99.0328
13.0084	91.3764	40.3805	99.0642
13.0556	91.5926	40.4578	99.1243
13.0788	91.7933	40.4972	99.1729
13.0724	91.9582	40.488	99.1928
13.0708	92.1213	40.4548	99.26
13.0976	92.315	40.4225	99.4151
13.1329	92.5018	40.4261	99.5876
13.1452	92.6543	40.4805	99.7268
13.1323	92.7515	40.5546	99.8406
13.1166	92.8383	40.6192	99.9095
13.1273	92.9485	40.6843	99.9353
13.1822	93.1061	40.753	99.9917
13.2603	93.2906	40.8017	100.108
13.3157	93.464	40.8234	100.224
13.3294	93.6093	40.8301	100.293
13.3215	93.7159	40.8263	100.319
13.3116	93.8354	40.8248	100.297
13.2976	93.9781	40.8428	100.265
13.2656	94.142	40.8741	100.32
13.2108	94.3017	40.9002	100.479
13.1565	94.4555	40.9306	100.656
13.144	94.6214	40.9827	100.793
13.1896	94.8093	41.0312	100.892
13.2531	95.0205	41.0451	100.957
13.2917	95.1983	41.0346	101.008
13.3083	95.3509	41.0299	101.09
13.3231	95.4924	41.0462	101.183
13.3402	95.6702	41.0848	101.209
13.346	95.8962	41.132	101.171
13.3245	96.1422	41.1508	101.151
13.2815	96.3718	41.1339	101.196
13.2619	96.5549	41.122	101.316
13.3061	96.7095	41.132	101.501
13.394	96.8271	41.1424	101.677
13.47	96.9328	41.1477	101.755
13.498	97.0167	41.1577	101.767
13.4842	97.0855	41.1665	101.81
13.4628	97.1844	41.1924	101.891
13.4622	97.3584	41.2705	101.973
13.4719	97.604	41.376	102.048
13.4631	97.8284	41.4379	102.092
13.4349	97.9778	41.4319	102.093
13.4226	98.0436	41.3879	102.127
13.4439	98.0976	41.3435	102.249
13.4685	98.1779	41.3481	102.397
13.4601	98.2757	41.4191	102.506
13.4219	98.3602	41.4916	102.595
13.394	98.4086	41.5011	102.661
13.419	98.4601	41.4797	102.697
13.5015	98.5353	41.4882	102.764
13.5945	98.6431	41.5215	102.899
13.6454	98.7317	41.5573	103.039
13.6464	98.7812	41.5845	103.146
13.6321	98.8025	41.5753	103.238
13.6325	98.8424	41.5315	103.293
13.6442	98.9515	41.5077	103.302
13.64	99.1141	41.5308	103.343
13.6061	99.2909	41.5732	103.446
13.5632	99.4247	41.6253	103.532
13.5526	99.5417	41.695	103.577
13.6011	99.6843	41.7588	103.626
13.6831	99.8806	41.7905	103.679
13.7415	100.093	41.7969	103.735
13.755	100.262	41.7843	103.845
13.7411	100.371	41.7608	103.989
13.7198	100.435	41.768	104.078
13.6997	100.528	41.8305	104.099
13.6776	100.656	41.9033	104.117
13.6454	100.799	41.9332	104.156
13.6194	100.903	41.9245	104.23
13.6396	100.954	41.9093	104.361
13.7107	100.978	41.9125	104.491
13.7831	101.008	41.9523	104.54
13.808	101.07	42.0145	104.549
13.7889	101.139	42.0465	104.614
13.7629	101.251	42.0355	104.728
13.7595	101.42	42.0284	104.84
13.7731	101.635	42.0586	104.934
13.7657	101.83	42.108	104.988
13.719	101.962	42.1483	105.002
13.6696	102.049	42.1669	105.045
13.6715	102.124	42.1561	105.154
13.7231	102.217	42.1357	105.253
13.7774	102.305	42.1415	105.274
13.7984	102.405	42.1649	105.26
13.7846	102.521	42.1719	105.262
13.7746	102.666	42.1668	105.28
13.8076	102.832	42.176	105.333
13.867	103.003	42.1952	105.449
13.896	103.184	42.2184	105.585
13.8749	103.368	42.2508	105.71
13.8394	103.56	42.2678	105.829
13.8371	103.735	42.2526	105.923
13.8783	103.92	42.2479	105.966
13.9224	104.106	42.2883	106.011
13.9193	104.257	42.3433	106.091
13.8727	104.36	42.3868	106.144
13.8383	104.426	42.4199	106.137
13.8528	104.503	42.4281	106.123
13.8947	104.603	42.4056	106.124
13.9146	104.727	42.3868	106.143
13.8964	104.83	42.3865	106.217
13.8712	104.91	42.3805	106.341
13.8762	104.985	42.384	106.425
13.9159	105.091	42.4333	106.441
13.9559	105.255	42.5053	106.455
13.958	105.444	42.5545	106.489
13.9276	105.63	42.5775	106.533
13.9031	105.769	42.5867	106.616
13.9005	105.876	42.5843	106.709
13.8945	105.947	42.5962	106.719
13.8575	106.022	42.6323	106.664
13.8	106.12	42.6458	106.644
13.7669	106.228	42.6178	106.663
13.7915	106.344	42.5983	106.68
13.8659	106.449	42.6177	106.707
13.9432	106.547	42.6538	106.727
13.9728	106.616	42.6903	106.7
13.9474	106.67	42.7192	106.684
13.9085	106.715	42.7225	106.742
13.8961	106.762	42.7171	106.813
13.9099	106.818	42.7429	106.84
13.931	106.876	42.7851	106.851
13.9365	106.943	42.7894	106.865
13.9209	107.006	42.7478	106.879
13.9149	107.1	42.7019	106.95
13.9457	107.225	42.6918	107.103
13.9874	107.388	42.7376	107.253
13.9957	107.559	42.8182	107.335
13.9655	107.703	42.8723	107.378
13.9275	107.81	42.8625	107.397
13.9156	107.882	42.8282	107.391
13.9336	107.942	42.8273	107.409
13.9521	107.979	42.8583	107.474
13.9452	108.023	42.8891	107.532
13.934	108.091	42.9064	107.558
13.9593	108.209	42.905	107.584
14.0149	108.371	42.8848	107.602
14.0536	108.532	42.8599	107.598
14.0492	108.657	42.8434	107.62
14.0255	108.72	42.8263	107.701
14.0247	108.768	42.8172	107.79
14.0688	108.837	42.8467	107.847
14.1369	108.963	42.9038	107.883
14.1767	109.126	42.9469	107.894
14.1654	109.294	42.9658	107.881
14.1344	109.445	42.9695	107.889
14.116	109.551	42.9521	107.934
14.1151	109.638	42.9318	107.951
14.1267	109.729	42.9445	107.926
14.1414	109.827	42.9744	107.926
14.1528	109.913	42.9933	107.971
14.1795	110.012	43.0234	108.027
14.2259	110.132	43.0805	108.081
14.2703	110.25	43.1307	108.102
14.2861	110.356	43.1591	108.053
14.2774	110.43	43.177	108.003
14.2688	110.493	43.1697	108.063
14.2795	110.552	43.1427	108.198
14.3074	110.641	43.1442	108.299
14.323	110.727	43.1824	108.334
14.3024	110.817	43.205	108.317
14.2633	110.927	43.1996	108.265
14.2579	111.062	43.1949	108.259
14.3122	111.234	43.195	108.354
14.3888	111.413	43.2069	108.474
14.4254	111.595	43.2463	108.532
14.4019	111.765	43.2765	108.562
14.3501	111.935	43.2487	108.601
14.3199	112.098	43.1933	108.634
14.3296	112.254	43.1666	108.693
14.3512	112.398	43.1609	108.792
14.348	112.5	43.1518	108.848
14.3208	112.573	43.1434	108.836
14.3082	112.635	43.1379	108.834
14.3343	112.734	43.138	108.862
14.3787	112.871	43.1612	108.882
14.4054	113.049	43.2029	108.925
14.4069	113.252	43.232	109.011
14.4043	113.471	43.2516	109.072
14.4215	113.696	43.2902	109.089
14.465	113.911	43.3435	109.123
14.507	114.127	43.384	109.186
14.5081	114.321	43.4101	109.259
14.4666	114.503	43.4282	109.367
14.416	114.655	43.4379	109.489
14.3796	114.77	43.4604	109.537
14.3608	114.846	43.5141	109.498
14.3579	114.899	43.5664	109.467
14.3671	114.963	43.5778	109.49
14.3926	115.028	43.5621	109.555
14.4422	115.092	43.5577	109.66
14.5021	115.138	43.5742	109.758
14.5342	115.191	43.6049	109.784
14.5222	115.266	43.6343	109.778
14.4937	115.366	43.6322	109.83
14.4821	115.468	43.5981	109.927
14.4924	115.532	43.5772	109.987
14.5069	115.564	43.5982	109.988
14.5054	115.587	43.6352	109.947
14.481	115.671	43.6637	109.885
14.4543	115.828	43.6894	109.871
14.449	116.036	43.7113	109.955
14.4536	116.225	43.7301	110.075
14.4465	116.354	43.7638	110.157
14.4273	116.429	43.7999	110.221
14.4115	116.456	43.7922	110.302
14.4197	116.484	43.7428	110.364
14.472	116.535	43.7042	110.387
14.5499	116.618	43.697	110.38
14.6031	116.697	43.7218	110.309
14.6143	116.763	43.7836	110.188
14.6109	116.811	43.8498	110.119
14.6218	116.837	43.8662	110.147
14.649	116.872	43.8498	110.22
14.6754	116.917	43.8557	110.32
14.6857	116.977	43.8794	110.461
14.6866	117.029	43.8986	110.59
14.702	117.092	43.9187	110.658
14.7382	117.177	43.9321	110.699
14.7684	117.278	43.9258	110.716
14.7677	117.431	43.9299	110.686
14.7489	117.537	43.9649	110.666
14.7431	117.592	43.9907	110.704
14.763	117.607	43.9954	110.743
14.7987	117.649	44.0215	110.748
14.832	117.744	44.0748	110.786
14.8462	117.885	44.1242	110.873
14.843	118.039	44.166	110.966
14.8387	118.207	44.2042	111.082
14.8346	118.405	44.222	111.213
14.8164	118.616	44.2333	111.267
14.7766	118.811	44.2683	111.245
14.735	118.94	44.3061	111.25
14.7223	118.986	44.3136	111.308
14.743	118.969	44.3123	111.373
14.7725	118.938	44.3246	111.438
14.7831	118.931	44.3283	111.495
14.7677	118.972	44.3074	111.516
14.7497	119.077	44.2722	111.554
14.7642	119.216	44.2294	111.674
14.803	119.381	44.1996	111.816
14.8207	119.515	44.2198	111.891
14.806	119.622	44.2847	111.911
14.7922	119.703	44.3421	111.92
14.8105	119.803	44.3701	111.929
14.8618	119.946	44.387	111.967
14.9184	120.117	44.3988	112.057
14.9352	120.305	44.406	112.141
14.899	120.472	44.4164	112.178
14.8465	120.633	44.4251	112.237
14.8182	120.803	44.4157	112.36
14.819	121.009	44.4057	112.501
14.829	121.226	44.4332	112.621
14.83	121.409	44.491	112.706
14.8123	121.533	44.5426	112.713
14.7884	121.596	44.5741	112.645
14.7833	121.662	44.5829	112.589
14.8001	121.771	44.5683	112.602
14.8156	121.958	44.557	112.663
14.8208	122.187	44.5701	112.757
14.8286	122.423	44.5699	112.873
14.849	122.529	44.5279	112.947
14.8878	122.8	44.4797	112.943
14.9388	123.055	44.4614	112.929
14.9758	123.257	44.4693	112.957
14.9877	123.409	44.5058	113.007
14.9959	123.504	44.5624	113.075
15.0152	123.574	44.5935	113.164
15.0357	123.647	44.5889	113.219
15.05	123.747	44.5901	113.23
15.0576	123.852	44.6088	113.268
15.062	123.903	44.6232	113.34
15.0733	123.895	44.6423	113.393
15.0904	123.858	44.6804	113.442
15.0922	123.865	44.7104	113.513
15.0631	123.92	44.7228	113.561
15.0203	124.004	44.7302	113.587
15.0008	124.089	44.7151	113.663
15.0167	124.15	44.6685	113.783
15.047	124.218	44.6437	113.869
15.0728	124.327	44.6841	113.914
15.0946	124.505	44.7504	113.946
15.1163	124.693	44.7954	113.962
15.1339	124.847	44.8175	113.997
15.136	124.875	44.8228	114.092
15.1125	124.97	44.8263	114.178
15.0769	125.006	44.8573	114.164
15.0635	124.997	44.8947	114.08
15.0846	124.964	44.8782	113.967
15.1159	124.921	44.8051	113.806
15.1193	124.935	44.729	113.632
15.0815	125.028	44.6664	113.52
15.0226	125.179	44.6038	113.441
14.9749	125.311	44.5426	113.329
14.9615	125.358	44.4763	113.181
14.9724	125.31	44.3903	112.981
14.9647	125.205	44.3069	112.693
14.9068	125.117	44.248	112.369
14.8174	125.053	44.1864	112.078
14.7293	125.021	44.092	111.799
14.6602	124.989	43.9787	111.504
14.6227	124.957	43.8727	111.234
14.6145	124.926	43.7811	111
14.6177	124.9	43.7139	110.763
14.6288	124.856	43.6673	110.532
14.6516	124.799	43.6008	110.331
14.656	124.724	43.4933	110.118
14.6128	124.652	43.3727	109.862
14.5353	124.611	43.2629	109.596
14.4668	124.575	43.1581	109.333
14.444	124.518	43.0583	109.062
14.466	124.346	42.9744	108.821
14.4915	124.229	42.8939	108.634
14.4799	124.105	42.8117	108.447
14.4361	123.96	42.7381	108.223
14.3952	123.822	42.6585	107.995
14.3666	123.696	42.5519	107.767
14.3284	123.623	42.4433	107.512
14.2699	123.585	42.3644	107.245
14.2081	123.548	42.2921	106.99
14.1616	123.493	42.2019	106.722
14.1432	123.427	42.1081	106.444
14.1443	123.376	42.0108	106.211
14.1299	123.32	41.896	106.021
14.0825	123.255	41.7846	105.823
14.0215	123.16	41.6959	105.612
13.9663	123.036	41.6028	105.399
13.9203	122.886	41.4977	105.132
13.8847	122.709	41.409	104.808
13.8497	122.535	41.3408	104.505
13.8072	122.386	41.2831	104.248
13.7708	122.3	41.2488	104.015
13.7549	122.261	41.2284	103.826
13.7437	122.241	41.1693	103.672
13.7058	122.194	41.0685	103.48
13.6327	122.11	40.9657	103.238
13.5503	122.016	40.8583	103.004
13.4924	121.934	40.73	102.778
13.4669	121.875	40.6131	102.543
13.4553	121.813	40.5342	102.347
13.4362	121.737	40.4712	102.195
13.4119	121.614	40.415	102.019
13.4055	121.46	40.3754	101.815
13.4281	121.306	40.3308	101.624
13.4565	121.185	40.2686	101.411
13.4582	121.11	40.2091	101.143
13.4276	121.07	40.1473	100.869
13.3833	121.053	40.0535	100.62
13.3436	121.008	39.9459	100.367
13.3051	120.943	39.8655	100.127
13.2536	120.859	39.8085	99.9283
13.1826	120.784	39.7486	99.7131
13.1026	120.727	39.6744	99.4538
13.0381	120.664	39.5707	99.2012
13.0019	120.642	39.4299	98.9646
12.9727	120.596	39.2861	98.7127
12.9235	120.543	39.1766	98.4579
12.8665	120.466	39.0986	98.2222
12.8283	120.379	39.0377	97.977
12.8211	120.28	38.9902	97.7254
12.8428	120.192	38.9422	97.5147
12.8633	120.157	38.8751	97.3368
12.8459	120.139	38.795	97.145
12.7947	120.125	38.7156	96.9435
12.7403	120.084	38.6183	96.7466
12.6941	120.041	38.4937	96.5232
12.6543	119.995	38.3707	96.2694
12.6237	119.96	38.2772	96.0314
12.601	119.909	38.2151	95.8219
12.5874	119.84	38.1836	95.6165
12.5789	119.742	38.1683	95.4183
12.5566	119.615	38.1208	95.2193
12.5028	119.491	38.0216	94.9735
12.4343	119.365	37.9107	94.6887
12.3837	119.245	37.8147	94.4234
12.3589	119.114	37.7234	94.187
12.3444	119.008	37.635	93.9553
12.323	118.957	37.553	93.7413
12.2817	118.951	37.464	93.5489
12.2171	118.965	37.3813	93.3205
12.1559	118.959	37.3326	93.049
12.1251	118.927	37.2922	92.7979
12.1128	118.839	37.2163	92.5812
12.0964	118.719	37.1166	92.3574
12.0656	118.583	37.0272	92.1227
12.0224	118.432	36.9469	91.8854
11.9868	118.267	36.886	91.6327
11.9777	118.096	36.859	91.3977
11.9748	117.951	36.8304	91.2283
11.9449	117.833	36.7646	91.0798
11.8984	117.757	36.684	90.8927
11.8746	117.686	36.6099	90.6984
11.8897	117.609	36.5199	90.5263
11.9155	117.502	36.4137	90.3508
11.9058	117.416	36.3175	90.1728
11.8462	117.313	36.2254	89.9983
11.7701	117.212	36.1408	89.7798
11.7228	117.134	36.0931	89.5043
11.7174	117.075	36.0712	89.2479
11.7215	117.028	36.0272	89.0482
11.6964	116.955	35.9631	88.8625
11.6459	116.881	35.9103	88.6751
11.6044	116.81	35.8572	88.4902
11.5859	116.737	35.7819	88.2782
11.5734	116.645	35.6926	88.0438
11.5446	116.517	35.5948	87.8392
11.4986	116.383	35.4954	87.656
11.4589	116.257	35.4253	87.4432
11.4518	116.15	35.3899	87.2107
11.4796	116.032	35.3432	86.9911
11.5089	115.891	35.2594	86.766
11.4941	115.742	35.166	86.5446
11.435	115.577	35.0856	86.3678
11.3722	115.42	35.0111	86.2169
11.3357	115.263	34.9371	86.0541
11.3259	115.112	34.8623	85.8947
11.3309	114.965	34.7775	85.744
11.3325	114.869	34.6951	85.5527
11.3248	114.833	34.6375	85.307
11.3192	114.865	34.5929	85.0559
11.3021	114.947	34.5306	84.8175
11.2479	115.021	34.452	84.5711
11.1667	115.044	34.3795	84.321
11.095	114.98	34.3166	84.0842
11.0511	114.868	34.2625	83.8631
11.0347	114.735	34.2192	83.6768
11.0275	114.621	34.161	83.5445
11.0021	114.534	34.065	83.4234
10.9579	114.468	33.9532	83.2575
10.9255	114.422	33.8564	83.0588
10.922	114.363	33.7714	82.8559
10.9283	114.321	33.6978	82.6383
10.9201	114.262	33.6503	82.4223
10.8942	114.188	33.6157	82.2447
10.8628	114.068	33.5743	82.091
10.8414	113.923	33.5334	81.9274
10.8306	113.783	33.489	81.7662
10.8072	113.658	33.4082	81.6159
10.7584	113.56	33.2999	81.4417
10.7121	113.487	33.2074	81.2429
10.6958	113.461	33.1396	81.0567
10.6932	113.457	33.0861	80.8733
10.6786	113.465	33.054	80.668
10.6462	113.436	33.0292	80.4573
10.6045	113.332	32.9713	80.2444
10.575	113.161	32.8866	80.008
10.5756	112.949	32.8115	79.7838
10.5848	112.74	32.7357	79.6189
10.5622	112.542	32.6411	79.4687
10.5037	112.387	32.5425	79.2736
10.4467	112.274	32.4483	79.0547
10.4299	112.201	32.3518	78.8347
10.4572	112.148	32.2796	78.6094
10.4945	112.101	32.2532	78.413
10.4993	112.05	32.241	78.2645
10.4542	111.962	32.2256	78.113
10.3803	111.841	32.2276	77.9301
10.3168	111.69	32.2309	77.7544
10.2809	111.548	32.1916	77.5841
10.258	111.416	32.106	77.3763
10.2359	111.293	31.9973	77.1427
10.222	111.161	31.8762	76.915
10.2233	111.02	31.7681	76.6838
10.2297	110.909	31.7021	76.4723
10.2261	110.822	31.6598	76.3296
10.2037	110.744	31.6083	76.2279
10.1724	110.633	31.5541	76.1001
10.1575	110.501	31.5121	75.9437
10.1731	110.375	31.4656	75.7848
10.1984	110.285	31.4052	75.6179
10.2001	110.231	31.34	75.4541
10.1762	110.182	31.2711	75.3112
10.1405	110.142	31.1993	75.1516
10.0993	110.093	31.1396	74.9498
10.0613	110.029	31.0885	74.7471
10.0381	109.932	31.0185	74.5734
10.0203	109.83	30.9284	74.4032
10.0027	109.746	30.8491	74.2198
10.0008	109.697	30.795	74.0355
10.0107	109.689	30.7566	73.8398
10.0031	109.677	30.7194	73.6215
9.96227	109.644	30.6677	73.4073
9.89612	109.561	30.5883	73.2203
9.83732	109.451	30.4984	73.0506
9.82921	109.323	30.4302	72.9088
9.86759	109.189	30.3762	72.8106
9.89062	109.051	30.3098	72.7203
9.86025	108.923	30.2312	72.5929
9.79775	108.833	30.1524	72.4365
9.73832	108.775	30.0713	72.2659
9.6971	108.765	30.0028	72.0668
9.66957	108.77	29.9671	71.8566
9.64621	108.758	29.9455	71.6698
9.62817	108.687	29.9139	71.4899
9.63571	108.57	29.8836	71.2991
9.67428	108.443	29.8552	71.1227
9.70623	108.323	29.8036	70.9736
9.67807	108.224	29.7379	70.824
9.58452	108.117	29.6865	70.6738
9.48078	108.002	29.6361	70.5416
9.42984	107.877	29.5716	70.3992
9.44956	107.769	29.5057	70.2227
9.50173	107.687	29.4388	70.0388
9.52246	107.616	29.3555	69.8506
9.49094	107.537	29.2779	69.6306
9.44372	107.422	29.2274	69.4104
9.41476	107.275	29.1721	69.2426
9.40045	107.083	29.0953	69.1152
9.37789	106.883	29.0262	68.9945
9.32949	106.703	28.9752	68.8667
9.26151	106.575	28.9243	68.6827
9.19995	106.491	28.8791	68.4219
9.1603	106.429	28.8494	68.18
9.13196	106.377	28.8139	68.0391
9.09929	106.306	28.77	67.9499
9.0676	106.226	28.7354	67.8474
9.06098	106.135	28.6945	67.7304
9.08721	106.075	28.629	67.5949
9.12519	106.005	28.5636	67.4353
9.1521	105.917	28.5192	67.2894
9.15836	105.805	28.4812	67.1692
9.14507	105.664	28.4514	67.0269
9.12088	105.53	28.4433	66.8539
9.09985	105.412	28.4353	66.6883
9.07907	105.306	28.3912	66.524
9.0466	105.163	28.31	66.343
9.0071	104.974	28.209	66.1694
8.98538	104.767	28.1039	66.0179
8.99298	104.607	28.0186	65.8709
9.01511	104.523	27.9659	65.735
9.03386	104.464	27.9241	65.6217
9.03138	104.399	27.8742	65.4878
8.99982	104.306	27.8282	65.3031
8.96737	104.218	27.7966	65.1004
8.96366	104.145	27.76	64.9117
8.9719	104.081	27.7049	64.7371
8.96017	103.989	27.6423	64.5849
8.92832	103.857	27.575	64.461
8.89006	103.733	27.5043	64.3392
8.86023	103.644	27.4406	64.2013
8.84827	103.609	27.3849	64.0623
8.84046	103.574	27.3224	63.9261
8.81732	103.506	27.2587	63.7724
8.78938	103.382	27.2127	63.6064
8.77997	103.234	27.1684	63.4483
8.78228	103.094	27.1053	63.2851
8.7735	102.992	27.0399	63.0337
8.73678	102.938	26.9837	62.9025
8.67457	102.879	26.9271	62.7722
8.61099	102.804	26.8815	62.6172
8.5743	102.713	26.8639	62.4547
8.56679	102.627	26.8424	62.316
8.56678	102.55	26.7854	62.186
8.56276	102.47	26.7062	62.0436
8.56191	102.368	26.6229	61.8952
8.56285	102.227	26.5413	61.7333
8.56009	102.09	26.4862	61.5398
8.55698	101.98	26.4636	61.3379
8.54887	101.909	26.4321	61.1559
8.52617	101.838	26.3796	60.9782
8.50133	101.739	26.3373	60.8056
8.48927	101.604	26.3053	60.6817
8.47647	101.447	26.2548	60.5996
8.44504	101.317	26.1941	60.5022
8.39801	101.227	26.1404	60.3758
8.34921	101.175	26.074	60.2355
8.3187	101.106	25.9976	60.071
8.31539	101.013	25.9448	59.8926
8.317	100.906	25.9112	59.7359
8.29429	100.833	25.8768	59.5864
8.24736	100.825	25.8493	59.408
8.20844	100.872	25.8289	59.2294
8.20154	100.945	25.7874	59.0884
8.21136	100.978	25.7307	58.9711
8.20175	100.946	25.6847	58.8685
8.1627	100.836	25.6401	58.7828
8.11413	100.682	25.5799	58.678
8.08166	100.513	25.5191	58.5357
8.07693	100.358	25.4626	58.3908
8.08716	100.233	25.3947	58.2485
8.08621	100.104	25.3196	58.0747
8.06547	99.9577	25.258	57.8946
8.04311	99.783	25.2109	57.7722
8.03672	99.6331	25.1756	57.6973
8.04246	99.5387	25.159	57.6236
8.05104	99.5009	25.1481	57.5338
8.05899	99.4731	25.1117	57.4148
8.06537	99.4235	25.0518	57.2592
8.0604	99.3668	24.995	57.0693
8.0347	99.3169	24.9468	56.9672
7.98313	99.3003	24.9036	56.857
7.92063	99.271	24.87	56.715
7.88827	99.1955	24.8418	56.5504
7.90935	99.0595	24.799	56.3759
7.95546	98.895	24.7377	56.2057
7.98715	98.7418	24.671	56.072
7.99478	98.6077	24.6003	55.9856
7.97924	98.489	24.5282	55.9081
7.95387	98.3487	24.4674	55.8117
7.93894	98.2051	24.4132	55.7038
7.93278	98.0749	24.3508	55.5856
7.92051	98.0029	24.2892	55.4431
7.90378	97.988	24.2489	55.2933
7.8857	97.9719	24.2131	55.1655
7.8614	97.9048	24.1626	55.0541
7.83659	97.7796	24.1079	54.9503
7.81732	97.6399	24.0543	54.8551
7.79037	97.4922	23.9971	54.7458
7.75038	97.3762	23.9571	54.5959
7.70824	97.301	23.9477	54.4289
7.67111	97.2656	23.9346	54.288
7.63531	97.2526	23.8972	54.1762
7.60567	97.2317	23.8567	54.0779
7.59084	97.1825	23.8183	53.9835
7.58857	97.0876	23.771	53.8649
7.59508	96.9916	23.7279	53.7085
7.60511	96.9224	23.6941	53.5222
7.59772	96.8719	23.6389	53.3838
7.56071	96.7965	23.5607	53.2654
7.51966	96.6862	23.4936	53.1453
7.50184	96.5521	23.4423	53.0042
7.50175	96.3902	23.3944	52.9119
7.4987	96.2368	23.3568	52.8035
7.48192	96.1181	23.3298	52.6828
7.45205	96.0503	23.2875	52.5369
7.42038	95.9878	23.2399	52.3422
7.3984	95.9127	23.2165	52.1494
7.38165	95.8251	23.1985	52.0291
7.35704	95.7467	23.1575	51.9501
7.32156	95.6882	23.1122	51.8458
7.29231	95.6174	23.0785	51.7216
7.29108	95.5285	23.04	51.599
7.31711	95.4234	22.9966	51.4723
7.34401	95.3468	22.9576	51.3588
7.344	95.2982	22.9067	51.2808
7.30446	95.25	22.8425	51.203
7.23823	95.1544	22.7896	51.0909
7.1845	95.0078	22.7467	50.9588
7.16495	94.8718	22.6882	50.8144
7.16226	94.79	22.6187	50.6514
7.15352	94.7771	22.5626	50.4736
7.14841	94.7707	22.5253	50.3582
7.16381	94.7342	22.5035	50.2403
7.19468	94.6559	22.4891	50.1121
7.22076	94.5675	22.4585	49.9947
7.22595	94.4907	22.3913	49.8861
7.2138	94.4035	22.3095	49.7756
7.20671	94.2972	22.2498	49.6798
7.22069	94.1733	22.2117	49.6092
7.23138	94.0836	22.1809	49.5383
7.203	94.019	22.1571	49.4467
7.14285	93.9605	22.1406	49.3263
7.09043	93.8761	22.1314	49.1604
7.06614	93.758	22.1331	48.9501
7.06556	93.6405	22.1349	48.7398
7.06842	93.573	22.101	48.5693
7.05346	93.5986	22.0269	48.4301
7.03172	93.6621	21.9479	48.3128
7.03034	93.6976	21.8819	48.2336
7.03833	93.6423	21.8165	48.1966
7.02819	93.5196	21.7545	48.1731
6.99564	93.3786	21.7117	48.1333
6.95113	93.2309	21.6807	48.0558
6.90472	93.069	21.6529	47.9235
6.86984	92.874	21.6309	47.7515
6.84481	92.674	21.5944	47.6209
6.81433	92.4836	21.5242	47.5239
6.78699	92.3415	21.4469	47.442
6.79495	92.2374	21.3938	47.3631
6.8485	92.1392	21.3563	47.2753
6.91712	92.0328	21.3259	47.1571
6.95835	91.9265	21.3019	47.0254
6.9481	91.8557	21.2597	46.9156
6.8954	91.8053	21.1931	46.8128
6.83929	91.7692	21.1366	46.6776
6.81199	91.7229	21.103	46.5245
6.80151	91.6755	21.0562	46.3771
6.78379	91.6257	20.9901	46.2316
6.76627	91.581	20.9314	46.1043
6.77308	91.5502	20.8828	46.0168
6.81143	91.5071	20.8414	45.9397
6.86399	91.4426	20.8236	45.8477
6.89268	91.335	20.8185	45.7676
6.87366	91.1924	20.787	45.6961
6.82261	91.0124	20.7331	45.5903
6.7739	90.8286	20.6924	45.4585
6.7424	90.6717	20.664	45.3488
6.72159	90.5606	20.6372	45.2604
6.70043	90.5057	20.6213	45.1708
6.68823	90.4739	20.6086	45.0752
6.69928	90.4408	20.5743	44.96
6.71781	90.3651	20.5203	44.8278
6.70942	90.2602	20.4523	44.7255
6.67057	90.146	20.3558	44.6676
6.62317	90.0489	20.2485	44.6039
6.58721	89.9723	20.18	44.5041
6.58063	89.8938	20.1589	44.3847
6.59627	89.8053	20.151	44.2496
6.59878	89.6828	20.1393	44.1094
6.57014	89.5499	20.1173	44.0048
6.53048	89.4125	20.0705	43.9489
6.50369	89.2917	20.0136	43.8726
6.49831	89.1744	19.9864	43.8201
6.51246	89.0464	19.9933	43.7496
6.52772	88.9211	19.9959	43.6658
6.52105	88.8192	19.9646	43.5667
6.49447	88.757	19.903	43.4501
6.4684	88.6912	19.8263	43.3192
6.44927	88.6198	19.763	43.1614
6.42816	88.5393	19.7289	43
6.40538	88.4648	19.6995	42.8726
6.38298	88.3952	19.6478	42.784
6.36671	88.3151	19.5856	42.7128
6.37001	88.2132	19.5352	42.6457
6.39602	88.0732	19.4869	42.5723
6.418	87.9327	19.4259	42.4733
6.41967	87.8052	19.3597	42.3469
6.40754	87.7072	19.2969	42.2123
6.38302	87.6238	19.2507	42.0717
6.35021	87.5532	19.2419	41.9212
6.31793	87.4947	19.26	41.7841
6.2832	87.4215	19.2528	41.6845
6.24732	87.3351	19.1976	41.6044
6.23292	87.2155	19.1271	41.5235
6.24462	87.0623	19.0708	41.4153
6.25334	86.8686	19.0386	41.3473
6.2379	86.6907	19.0314	41.2502
6.20461	86.5752	19.0191	41.1437
6.17262	86.546	18.9545	41.0581
6.16164	86.598	18.8584	40.9619
6.17072	86.6701	18.7992	40.8561
6.16535	86.7148	18.7998	40.7606
6.11415	86.6968	18.8279	40.6624
6.03982	86.6462	18.8461	40.5473
5.99704	86.5887	18.8297	40.4403
6.00834	86.5525	18.774	40.3496
6.04366	86.5262	18.7124	40.2515
6.06194	86.4882	18.6708	40.157
6.05078	86.4475	18.6257	40.0903
6.03826	86.3936	18.5681	40.0257
6.05882	86.3308	18.5276	39.9391
6.10733	86.2435	18.5073	39.8522
6.14204	86.1407	18.4735	39.7717
6.13376	86.0199	18.4206	39.6802
6.09344	85.897	18.3659	39.5846
6.05603	85.7831	18.3114	39.4816
6.04152	85.6755	18.2727	39.3429
6.03508	85.5988	18.2727	39.1964
6.01663	85.5641	18.2879	39.0954
5.98824	85.597	18.2771	39.0373
5.96369	85.6488	18.243	38.9815
5.95042	85.6699	18.2022	38.9202
5.94417	85.6261	18.1557	38.8539
5.92513	85.5296	18.1105	38.7687
5.88303	85.4102	18.0733	38.6757
5.84562	85.285	18.0308	38.5961
5.84525	85.1737	17.9787	38.5109
5.87453	85.0576	17.9399	38.399
5.90083	84.9567	17.926	38.281
5.89468	84.8756	17.9075	38.1818
5.85089	84.8171	17.8596	38.0975
5.79816	84.7547	17.7941	38.0248
5.77995	84.6568	17.7367	37.9608
5.80045	84.5258	17.7039	37.8816
5.82158	84.3727	17.6957	37.7767
5.81458	84.2373	17.6913	37.6674
5.79301	84.1172	17.6639	37.5607
5.77989	84.0318	17.6229	37.4559
5.78098	83.9674	17.5985	37.3291
5.78136	83.9022	17.5844	37.206
5.75636	83.8193	17.5516	37.1053
5.70393	83.7101	17.4914	37.0308
5.65291	83.5976	17.417	36.9794
5.62081	83.4728	17.3497	36.9331
5.5958	83.3552	17.3163	36.8633
5.5757	83.243	17.3272	36.7771
5.57531	83.1665	17.3414	36.7068
5.59791	83.1368	17.2865	36.6516
5.64076	83.1587	17.222	36.5859
5.68641	83.2029	17.1816	36.5094
5.69408	83.194	17.1412	36.429
5.65212	83.1214	17.1129	36.3345
5.60163	83.008	17.1005	36.2366
5.58417	82.8947	17.0761	36.1596
5.60019	82.7701	17.031	36.0902
5.6285	82.6417	17.0016	36.0045
5.63879	82.5226	16.9997	35.9216
5.61161	82.4292	16.9881	35.8538
5.56012	82.3821	16.9514	35.7928
5.51542	82.3445	16.9036	35.7447
5.48139	82.2936	16.8457	35.7115
5.44056	82.2103	16.7968	35.6641
5.38857	82.1233	16.7847	35.5799
5.34283	82.0445	16.7881	35.4907
5.32137	81.9779	16.7626	35.4101
5.32687	81.9155	16.7162	35.321
5.34255	81.8462	16.686	35.2298
5.34093	81.7848	16.6693	35.1458
5.31443	81.7213	16.6527	35.0521
5.28881	81.6799	16.6352	34.9537
5.29426	81.6485	16.6035	34.8784
5.3296	81.6054	16.5538	34.8071
5.36226	81.5133	16.5166	34.7057
5.36114	81.3829	16.4979	34.5921
5.32919	81.2615	16.4576	34.4905
5.29273	81.1803	16.3818	34.3899
5.26303	81.1435	16.3076	34.2911
5.23302	81.0903	16.2654	34.2063
5.19139	81.0022	16.2601	34.1197
5.14127	80.8776	16.2802	34.0279
5.11633	80.7481	16.2878	33.911
5.14399	80.6392	16.247	33.8768
5.19576	80.5499	16.1779	33.8469
5.21522	80.4645	16.1261	33.786
5.19652	80.367	16.102	33.6976
5.17516	80.2913	16.0862	33.5974
5.17786	80.2261	16.0698	33.5016
5.19348	80.1635	16.0555	33.4223
5.18143	80.0819	16.0421	33.3493
5.11268	79.9947	16.0308	33.2641
5.01878	79.9236	16.0161	33.1758
4.96634	79.8626	15.9723	33.1069
4.9821	79.8061	15.8919	33.0512
5.03423	79.7207	15.8076	33.0006
5.07914	79.6147	15.7547	32.967
5.09836	79.4852	15.7348	32.9555
5.10344	79.3671	15.7285	32.9428
5.12014	79.2624	15.7167	32.9088
5.15139	79.1605	15.6825	32.8479
5.15992	79.0605	15.6377	32.7553
5.1214	78.9544	15.6148	32.6449
5.06362	78.8565	15.618	32.5526
5.02685	78.7604	15.6149	32.4841
5.02473	78.6814	15.5902	32.4048
5.0417	78.606	15.5571	32.3059
5.04887	78.5319	15.5202	32.2205
5.02869	78.4526	15.476	32.1626
5.01024	78.3717	15.4324	32.1193
5.02534	78.3073	15.389	32.0801
5.05578	78.2413	15.3374	32.0256
5.06015	78.1898	15.2978	31.9264
5.0264	78.1479	15.2867	31.7981
4.97341	78.1131	15.269	31.6828
4.93571	78.0523	15.2172	31.5888
4.93603	77.9637	15.1557	31.5151
4.95448	77.8595	15.1111	31.471
4.94663	77.7365	15.0869	31.4355
4.90488	77.6109	15.0891	31.3754
4.86787	77.4749	15.1069	31.308
4.86767	77.3547	15.1007	31.2572
4.89709	77.2447	15.0724	31.2014
4.92312	77.1482	15.0616	31.1258
4.91663	77.0591	15.0659	31.0437
4.8776	76.9872	15.0439	30.9785
4.83947	76.9391	14.9817	30.9145
4.83236	76.8989	14.895	30.8759
4.84833	76.8439	14.8058	30.8539
4.85305	76.7198	14.7511	30.8038
4.82812	76.5501	14.7502	30.7199
4.79229	76.3867	14.7572	30.639
4.77923	76.2765	14.7254	30.5662
4.796	76.2084	14.6773	30.4823
4.82105	76.1412	14.6556	30.3896
4.83248	76.0606	14.6585	30.2893
4.8284	75.9754	14.6579	30.1824
4.81797	75.9412	14.6333	30.0979
4.81678	75.9527	14.5747	30.0546
4.8148	75.9896	14.5095	30.0242
4.78242	75.9944	14.4847	29.9873
4.72356	75.9416	14.4962	29.9604
4.68121	75.8616	14.4935	29.954
4.68251	75.8008	14.4553	29.9371
4.7147	75.784	14.4024	29.8939
4.74578	75.7739	14.3556	29.8268
4.74432	75.7573	14.3218	29.7381
4.7084	75.7109	14.2935	29.646
4.67789	75.6629	14.2509	29.5785
4.68001	75.6177	14.186	29.5357
4.69535	75.5666	14.1252	29.4915
4.69236	75.4956	14.104	29.4374
4.6688	75.3933	14.1161	29.3859
4.64134	75.293	14.1354	29.3285
4.62774	75.1999	14.1465	29.2451
4.62894	75.115	14.1383	29.1379
4.62051	75.0116	14.1069	29.0227
4.58327	74.9148	14.0715	28.9108
4.53867	74.8545	14.0485	28.8143
4.52799	74.8338	14.0255	28.7465
4.55303	74.8478	13.992	28.6989
4.58621	74.8426	13.9612	28.6549
4.59948	74.7858	13.9403	28.6128
4.5796	74.6586	13.9185	28.5697
4.54756	74.514	13.8883	28.5141
4.54428	74.3894	13.8492	28.458
4.57223	74.3025	13.8003	28.4126
4.59051	74.2312	13.7644	28.3564
4.57663	74.1378	13.7714	28.2765
4.54727	74.0321	13.801	28.2018
4.52708	73.9243	13.7977	28.1474
4.53385	73.8641	13.7553	28.0963
4.55861	73.8437	13.7136	28.0505
4.56926	73.8216	13.6817	28.0165
4.56065	73.738	13.6529	27.9708
4.57026	73.5967	13.6234	27.9045
4.61604	73.4484	13.5809	27.8329
4.66184	73.3281	13.5332	27.7486
4.66065	73.2588	13.5248	27.645
4.61161	73.2053	13.5665	27.5576
4.56046	73.1615	13.6003	27.5103
4.55252	73.1236	13.5864	27.4823
4.58642	73.1025	13.5396	27.4619
4.6139	73.0918	13.4814	27.4503
4.59888	73.0589	13.4338	27.4194
4.55592	72.9706	13.4188	27.3485
4.53165	72.8162	13.4153	27.2629
4.54738	72.6538	13.3764	27.1813
4.57369	72.4999	13.3144	27.1
4.56221	72.3843	13.2871	27.0307
4.5084	72.3058	13.3059	26.9805
4.45476	72.2586	13.3371	26.9197
4.43446	72.2375	13.3555	26.8309
4.43295	72.2274	13.3438	26.7395
4.40967	72.2058	13.3013	26.661
4.34264	72.1254	13.2649	26.5885
4.26271	71.9974	13.2559	26.5286
4.23735	71.8406	13.2443	26.4873
4.29198	71.719	13.204	26.4448
4.37339	71.6515	13.1506	26.395
4.41976	71.6113	13.1079	26.3526
4.41287	71.5699	13.0838	26.3144
4.37497	71.5151	13.0729	26.2682
4.34918	71.4612	13.0546	26.2229
4.36378	71.3988	13.0047	26.1867
4.39206	71.3341	12.9356	26.1404
[truncated: 3,501 more rows]

## Sheet: panel_D_left
0.0855072	-0.0874344	-0.171641	-0.163177
0.10943	-0.0871959	-0.241672	-0.160553
0.132282	-0.113631	-0.316959	-0.149221
0.0921868	-0.15126	-0.326399	-0.122446
-0.00978829	-0.161134	-0.277749	-0.0988433
-0.102897	-0.129979	-0.228383	-0.0717628
-0.126342	-0.100599	-0.215853	-0.0123713
-0.0620022	-0.0954471	-0.239517	0.0726975
0.0505585	-0.114493	-0.262653	0.145778
0.120326	-0.125593	-0.243033	0.190349
0.110514	-0.119503	-0.194688	0.200402
0.0827194	-0.0965328	-0.175089	0.163633
0.0913875	-0.0701916	-0.200077	0.0913422
0.114078	-0.0518193	-0.223089	0.0194778
0.120677	-0.0326766	-0.203529	-0.0361282
0.108381	-0.0257273	-0.152239	-0.0797616
0.0815515	-0.0410506	-0.110449	-0.0989834
0.0806001	-0.0959691	-0.107568	-0.0836614
0.12771	-0.161795	-0.13221	-0.0563946
0.162786	-0.196706	-0.132952	-0.0380808
0.129128	-0.182689	-0.0767495	-0.0151814
0.0675255	-0.129539	-0.00600592	0.0134105
0.0371562	-0.0768379	-0.00182555	0.0332178
0.0473107	-0.0462269	-0.0864321	0.0548662
0.0766861	-0.0497114	-0.195169	0.081323
0.084832	-0.0542207	-0.250727	0.0777865
0.0306346	-0.0467441	-0.238018	0.0332753
-0.0502015	-0.0384561	-0.1975	-0.00712233
-0.0653743	-0.0579394	-0.18362	-0.0147029
-0.00934464	-0.111362	-0.217504	0.00430074
0.0383782	-0.166401	-0.2538	0.0540616
0.0263013	-0.184743	-0.237533	0.11524
-0.0290236	-0.142799	-0.182151	0.130676
-0.0728085	-0.0717578	-0.146855	0.0862112
-0.0506661	-0.0149411	-0.145251	0.0200163
0.0276292	-0.000967298	-0.151006	-0.0514728
0.0672755	-0.0098538	-0.147894	-0.120685
0.0159925	-0.00921841	-0.12327	-0.146771
-0.0589486	0.00140248	-0.0835244	-0.115655
-0.0671016	0.00672786	-0.0680539	-0.0658119
-0.0002885	-0.0115572	-0.0847121	-0.0173407
0.0784207	-0.0374568	-0.0807739	0.0234633
0.103534	-0.0538879	-0.0296763	0.0165032
0.0708514	-0.0496098	0.02678	-0.0461658
0.0396913	-0.0484208	0.0492636	-0.10916
0.0522982	-0.0678997	0.0367096	-0.142622
0.095521	-0.0919668	0.0146989	-0.163798
0.113804	-0.101935	0.0256275	-0.169195
0.0808663	-0.0844568	0.0901758	-0.154776
0.0437164	-0.0614907	0.161069	-0.148197
0.0584422	-0.0475771	0.184874	-0.149325
0.0998111	-0.0607151	0.177028	-0.124435
0.0888113	-0.0783042	0.177122	-0.0818487
0.00557258	-0.0820803	0.190236	-0.0506754
-0.0981768	-0.0678775	0.196962	-0.0182989
-0.149315	-0.0511761	0.177684	0.0236485
-0.0995878	-0.052195	0.123039	0.0543672
0.0119047	-0.0625169	0.0685088	0.0709361
0.085409	-0.0769509	0.0732421	0.0826396
0.0823969	-0.0715812	0.132383	0.0704356
0.0640039	-0.0431356	0.174108	0.0236973
0.086072	-0.00847383	0.152879	-0.0152994
0.140594	-0.00233128	0.0892927	-0.011487
0.183541	-0.0351679	0.0395332	0.0265621
0.168229	-0.0750389	0.0456183	0.0858683
0.0904524	-0.098612	0.091732	0.161077
0.0273396	-0.0813054	0.113205	0.231628
0.0482684	-0.0484552	0.0817093	0.275487
0.103447	-0.0298082	0.0474115	0.295242
0.114575	-0.0330693	0.0639644	0.282957
0.0780047	-0.0300469	0.114645	0.214998
0.0410585	-5.19778e-05	0.143435	0.11088
0.0431761	0.0322701	0.118559	0.0326774
0.096493	0.0433233	0.0563167	0.00635147
0.147154	0.00989158	0.00552705	0.0152006
0.125565	-0.0387148	0.00613999	0.0490175
0.0603563	-0.0769333	0.0451304	0.099318
0.0332528	-0.0779968	0.0650711	0.145333
0.0536539	-0.0448296	0.0399582	0.187121
0.0788311	-0.0079307	0.0140003	0.242352
0.0851094	0.00997768	0.0334619	0.293606
0.062003	0.00214861	0.0806508	0.306927
0.0316969	-0.0130035	0.103307	0.291584
0.040528	-0.0348889	0.0680929	0.263486
0.0749572	-0.0557032	-0.0136013	0.211783
0.0611496	-0.0762552	-0.0894228	0.143764
-0.0195555	-0.0884065	-0.0995249	0.0934179
-0.0871717	-0.0805635	-0.0505234	0.0671496
-0.0753656	-0.0634387	-0.00851813	0.0527192
0.00629599	-0.0477031	-0.00365981	0.057754
0.0936917	-0.0407374	-0.0122262	0.0716841
0.107162	-0.0242273	-0.0158033	0.0607172
0.026984	0.00326434	-0.0115923	0.0374355
-0.0635084	0.0359983	0.00480717	0.0424666
-0.072038	0.0534182	0.0202546	0.0702988
-0.0268899	0.0504301	0.0135214	0.102428
-0.024586	0.0432517	0.00887448	0.145045
-0.103802	0.0461031	0.037084	0.182277
-0.207709	0.0754601	0.0751536	0.177011
-0.251163	0.115531	0.0876036	0.144074
-0.205776	0.152933	0.0780902	0.115623
-0.136148	0.170403	0.0639207	0.0753236
-0.123281	0.182649	0.0605741	0.0172365
-0.161713	0.194649	0.0828022	-0.0274491
-0.172488	0.21194	0.105247	-0.0569208
-0.0966834	0.232882	0.0820701	-0.086659
0.0159158	0.236613	0.0262448	-0.101636
0.0515458	0.213432	0.00364543	-0.0996957
-0.0222466	0.162805	0.0362569	-0.104721
-0.131214	0.115086	0.0872163	-0.106335
-0.186266	0.0915029	0.11564	-0.0853454
-0.159019	0.100263	0.104751	-0.0762712
-0.0794783	0.118986	0.0753622	-0.116485
-0.0268515	0.121339	0.0722913	-0.174824
-0.0451404	0.109018	0.102327	-0.202482
-0.0833799	0.0846519	0.12104	-0.180018
-0.0847837	0.0653814	0.101712	-0.109743
-0.0690582	0.0457811	0.0721907	-0.0306233
-0.084089	0.0400131	0.0585821	-0.011845
-0.136963	0.0584667	0.0604474	-0.079157
-0.200375	0.094583	0.0677428	-0.174323
-0.215325	0.121505	0.0636627	-0.240378
-0.152577	0.115017	0.0413141	-0.278784
-0.0723266	0.0837632	0.0327351	-0.307149
-0.066298	0.0315055	0.0734923	-0.330014
-0.121677	0.000598515	0.144906	-0.345698
-0.150195	0.00877072	0.191463	-0.336789
-0.122364	0.0476156	0.183546	-0.277118
-0.0696701	0.0789828	0.137062	-0.18425
-0.0329859	0.0835166	0.0918808	-0.116893
-0.0442577	0.073463	0.0834728	-0.096538
-0.0717744	0.0622727	0.108062	-0.0941091
-0.0338384	0.0678009	0.123113	-0.0935853
0.0710417	0.0772656	0.101355	-0.0981888
0.147502	0.0900572	0.0743937	-0.0966352
0.137776	0.106256	0.0858681	-0.0890287
0.0568416	0.133558	0.128014	-0.0925408
-0.0494036	0.168238	0.152691	-0.0995345
-0.114064	0.18346	0.131444	-0.0845907
-0.104583	0.174266	0.0727245	-0.0591197
-0.0834335	0.141422	0.0106726	-0.0488199
-0.103674	0.102775	-0.0112913	-0.0373715
-0.119635	0.0645357	0.00713013	-0.0111913
-0.0806267	0.047083	0.0114932	0.0136075
-0.00728052	0.0530897	-0.0255609	0.0422115
0.0424329	0.0737573	-0.0555957	0.0932632
0.0314936	0.100492	-0.029449	0.144905
-0.0438669	0.115785	0.0304172	0.17583
-0.134126	0.120926	0.0779875	0.206106
-0.176199	0.109276	0.0870632	0.23871
-0.175774	0.0872964	0.0636689	0.24504
-0.189775	0.0543091	0.0619996	0.232446
-0.232839	0.0299696	0.132004	0.225804
-0.257686	0.0237121	0.238995	0.215983
-0.226071	0.0363689	0.304397	0.204206
-0.147488	0.053066	0.316101	0.210374
-0.0692539	0.0506748	0.312883	0.214488
-0.0391453	0.0333958	0.316794	0.187662
-0.0538284	0.0156987	0.327864	0.155023
-0.0566582	0.0212704	0.329697	0.142921
0.00184514	0.050933	0.288378	0.127421
0.0905608	0.0907258	0.211378	0.101508
0.131467	0.116879	0.163736	0.091678
0.0886953	0.124841	0.182013	0.0940955
0.016958	0.130417	0.233229	0.0940432
-0.0225304	0.13114	0.271465	0.110567
-0.0334329	0.133926	0.277058	0.145312
-0.0492389	0.132355	0.259548	0.172344
-0.0997154	0.132527	0.249837	0.200265
-0.177903	0.133741	0.267249	0.247535
-0.222179	0.145536	0.275906	0.283236
-0.178764	0.170785	0.237596	0.271992
-0.0887991	0.192105	0.177197	0.233393
-0.0268499	0.194252	0.145725	0.19229
-0.00755556	0.157304	0.15873	0.160503
-0.0075211	0.107846	0.195621	0.164211
-0.0136342	0.0672408	0.225974	0.205138
-0.0168902	0.060718	0.228056	0.242076
-0.0263836	0.0790517	0.21922	0.254501
-0.0670366	0.098274	0.241983	0.275177
-0.108937	0.108715	0.297198	0.323559
-0.08616	0.113235	0.336677	0.372983
-0.00263519	0.116489	0.333654	0.398617
0.0730272	0.100305	0.310286	0.390493
0.0936186	0.0858027	0.300832	0.340233
0.0568244	0.0948208	0.319333	0.264378
-0.0131634	0.132232	0.349345	0.20895
-0.0486771	0.181981	0.349918	0.189328
-0.0111328	0.219579	0.301644	0.180403
0.0411855	0.238741	0.241612	0.173376
0.047333	0.227878	0.224366	0.184236
0.026264	0.199391	0.248259	0.203698
0.0093781	0.157485	0.264791	0.209978
0.00429717	0.12312	0.249713	0.209767
0.0161661	0.102011	0.222489	0.202044
0.01366	0.0952687	0.210505	0.170431
-0.0339051	0.101809	0.224951	0.128486
-0.0838314	0.103523	0.251603	0.102317
-0.0827751	0.10109	0.250476	0.0826474
-0.0651429	0.0922743	0.198689	0.064223
-0.0693787	0.0859604	0.138351	0.081749
-0.0650941	0.076644	0.123156	0.137732
-0.0256815	0.0683203	0.152525	0.185451
0.0354268	0.0493118	0.193525	0.208677
0.0916846	0.0156977	0.222009	0.217211
0.111764	-0.0173667	0.221334	0.198778
0.067356	-0.0450556	0.193963	0.156377
-0.0219951	-0.0699586	0.178538	0.124136
-0.0956148	-0.0992873	0.190213	0.0970068
-0.120698	-0.114763	0.189772	0.0477895
-0.101158	-0.100657	0.155539	0.00387785
-0.0526388	-0.0575687	0.121266	0.00476062
0.0078814	-0.0155869	0.11594	0.031533
0.0577842	-0.0050882	0.133246	0.0564319
0.0892027	-0.0163128	0.157985	0.0700421
0.0991772	-0.0219812	0.167704	0.0478017
0.0871852	0.0123414	0.150329	-0.0139028
0.0558304	0.0684132	0.138692	-0.0692565
0.0165082	0.113359	0.164003	-0.0963598
-0.00865757	0.117379	0.196967	-0.119487
-0.0162203	0.082887	0.194955	-0.143794
-0.019908	0.0275717	0.168334	-0.162183
-0.0298117	-0.0238736	0.142586	-0.19906
-0.0376427	-0.0420462	0.129164	-0.261881
-0.0301671	-0.0303942	0.134123	-0.310453
0.0107083	0.0160513	0.147142	-0.328498
0.10097	0.0766157	0.144722	-0.329706
0.199016	0.127996	0.129146	-0.303033
0.232929	0.136748	0.124001	-0.240411
0.194565	0.0959635	0.125888	-0.168579
0.128021	0.0238745	0.11801	-0.10984
0.0545042	-0.0511035	0.103007	-0.0641625
-0.00978825	-0.0842402	0.0874864	-0.0495382
-0.0313034	-0.0618506	0.0735476	-0.0793711
-0.0220425	0.010669	0.073502	-0.121725
-0.0197281	0.0884997	0.0893437	-0.152299
-0.0226678	0.137543	0.0916088	-0.188945
-0.0131433	0.146637	0.0618977	-0.247972
-0.00583989	0.117992	0.0277329	-0.309418
-0.00206801	0.0818984	0.0218753	-0.350876
0.00520419	0.0575758	0.0457425	-0.366019
-0.00769964	0.0558962	0.0814236	-0.349313
-0.042903	0.0513524	0.105892	-0.308223
-0.0593485	0.0490041	0.0980106	-0.27699
-0.0460496	0.0555968	0.0713225	-0.271868
-0.0422669	0.0721493	0.0691924	-0.269276
-0.0622753	0.0901438	0.109061	-0.2632
-0.0966431	0.0884309	0.160885	-0.275612
-0.143355	0.0710797	0.192527	-0.305311
-0.179067	0.0416407	0.198086	-0.330665
-0.173996	0.0194949	0.181201	-0.349645
-0.148884	-0.00205078	0.147154	-0.364732
-0.125001	-0.0281367	0.110824	-0.361937
-0.0830633	-0.0643268	0.0779401	-0.351868
-0.032666	-0.0974655	0.0437844	-0.358329
-0.00840244	-0.104277	0.0219854	-0.368013
-0.00384267	-0.0848608	0.0303137	-0.364126
-0.0036153	-0.0396536	0.047803	-0.372721
-0.0293277	0.0101804	0.0357151	-0.41406
-0.08013	0.0450809	-0.00161404	-0.456826
-0.105626	0.0553372	-0.0384523	-0.479651
-0.0876932	0.0540776	-0.0649094	-0.494109
-0.0450448	0.0513125	-0.0733501	-0.495432
-0.00328816	0.0466222	-0.0620611	-0.481363
0.00863089	0.0495899	-0.0581883	-0.480851
-0.0264157	0.0489466	-0.0825039	-0.49317
-0.0851401	0.04359	-0.106867	-0.483425
-0.13078	0.0209572	-0.103081	-0.455585
-0.155523	-0.0122659	-0.0859874	-0.43539
-0.165622	-0.0469325	-0.0706977	-0.416961
-0.155095	-0.0651937	-0.0558721	-0.401319
-0.117239	-0.061228	-0.0486167	-0.410341
-0.0696204	-0.0456867	-0.0513703	-0.419095
-0.0378176	-0.0289616	-0.0426481	-0.390454
-0.0351355	-0.0343058	-0.0246274	-0.353273
-0.0524319	-0.0577784	-0.0244511	-0.340801
-0.0682103	-0.101094	-0.0396272	-0.333547
-0.0706903	-0.145011	-0.047585	-0.322784
-0.051232	-0.171074	-0.0463375	-0.328293
-0.0236224	-0.165824	-0.0431545	-0.344888
-0.0195043	-0.13841	-0.0401454	-0.366035
-0.0369544	-0.103685	-0.0549368	-0.40801
-0.0329132	-0.0621489	-0.0921452	-0.456219
0.00519756	-0.0271506	-0.121067	-0.469117
0.042308	0.00416066	-0.122778	-0.454408
0.061892	0.0252747	-0.106821	-0.443575
0.0533056	0.0320394	-0.080662	-0.431884
0.0168759	0.0195113	-0.0479249	-0.418536
-0.00925254	-0.00594256	-0.0264155	-0.423788
-0.00323212	-0.0223066	-0.0272848	-0.444185
-0.00982288	-0.0316583	-0.040074	-0.46004
-0.0483913	-0.0227346	-0.0607556	-0.481672
-0.0813259	-0.0028634	-0.0886678	-0.525186
-0.0888824	0.023715	-0.107039	-0.56911
-0.0717767	0.0272776	-0.102688	-0.593617
-0.0247303	0.00353568	-0.0922558	-0.606566
0.0322484	-0.0282425	-0.0949144	-0.608748
0.05958	-0.0570544	-0.106819	-0.587504
0.0663773	-0.0661782	-0.118099	-0.550262
0.0806148	-0.0626625	-0.125356	-0.521836
0.0905227	-0.0515078	-0.12162	-0.504038
0.0828908	-0.0536213	-0.10901	-0.489817
0.0677789	-0.0580568	-0.104612	-0.495658
0.0417445	-0.0565491	-0.110845	-0.529959
0.00644403	-0.0471547	-0.10886	-0.565648
-0.00802621	-0.0277088	-0.100184	-0.588978
-0.00502632	-0.0140067	-0.113749	-0.607072
-0.034156	-0.00956147	-0.15846	-0.610512
-0.0976144	-0.0181732	-0.208972	-0.597897
-0.142323	-0.0202463	-0.247344	-0.599752
-0.144886	-0.00762554	-0.27413	-0.62499
-0.10855	0.0157358	-0.284074	-0.639706
-0.0440885	0.0431909	-0.278348	-0.635097
-0.00298085	0.0705727	-0.267667	-0.632308
-0.0141902	0.10651	-0.246192	-0.629336
-0.0319412	0.134167	-0.208237	-0.620283
-0.0104374	0.153359	-0.182299	-0.617084
0.0260228	0.154214	-0.194875	-0.610042
0.0339861	0.136368	-0.226781	-0.576302
8.71425e-05	0.102631	-0.253368	-0.537656
-0.0694904	0.0752186	-0.273026	-0.531537
-0.138116	0.0750926	-0.273297	-0.542984
-0.159492	0.109856	-0.247956	-0.547285
-0.137374	0.176389	-0.222611	-0.560063
-0.114436	0.236166	-0.218488	-0.587785
-0.104431	0.264388	-0.220027	-0.619664
-0.0809463	0.249278	-0.220585	-0.664504
-0.039895	0.209429	-0.236925	-0.710491
-0.0128065	0.162082	-0.266707	-0.715073
-0.0234036	0.123223	-0.294521	-0.68394
-0.0552799	0.0987398	-0.319829	-0.672731
-0.0756315	0.0853128	-0.339313	-0.692061
-0.0607951	0.0891884	-0.341074	-0.714502
-0.0177019	0.103076	-0.339346	-0.736825
0.0114573	0.124294	-0.355516	-0.755142
-0.0120943	0.136747	-0.374808	-0.751084
-0.0829781	0.138898	-0.37596	-0.743409
-0.13624	0.134461	-0.363466	-0.759705
-0.131321	0.126871	-0.348587	-0.776895
-0.089541	0.128538	-0.336684	-0.769031
-0.0454645	0.134593	-0.336138	-0.753344
-0.00791208	0.14312	-0.338876	-0.741766
0.0241508	0.135967	-0.317648	-0.722243
0.0606214	0.13247	-0.275807	-0.703965
0.110256	0.143771	-0.241048	-0.696701
0.133017	0.170044	-0.2254	-0.679187
0.0909927	0.190978	-0.221669	-0.655858
0.0259716	0.185758	-0.227949	-0.664847
-0.000336405	0.167077	-0.23762	-0.705801
0.0165411	0.144898	-0.23955	-0.742405
0.0529007	0.135801	-0.242814	-0.762589
0.0793058	0.128034	-0.263639	-0.771294
0.0647494	0.12527	-0.293589	-0.748925
0.033686	0.131331	-0.312137	-0.685048
0.0391888	0.1531	-0.314092	-0.600567
0.0639299	0.178567	-0.302016	-0.517622
0.0426457	0.166509	-0.279615	-0.450668
-0.0253304	0.113892	-0.262321	-0.427626
-0.0740001	0.0437827	-0.261568	-0.464525
-0.0544139	-0.00259982	-0.260839	-0.529619
0.0417748	-0.0170212	-0.244804	-0.58183
0.158072	-0.00336962	-0.227745	-0.612063
0.192181	0.0250414	-0.221894	-0.622141
0.111191	0.0516629	-0.213173	-0.607262
0.00513925	0.0818943	-0.197102	-0.586236
-0.047431	0.10695	-0.193658	-0.580181
-0.0543857	0.131791	-0.210079	-0.571464
-0.0482649	0.140086	-0.232764	-0.549745
-0.0525296	0.132414	-0.251783	-0.538726
-0.0787931	0.112158	-0.25569	-0.54004
-0.0906733	0.0930554	-0.232185	-0.518906
-0.0446152	0.0853229	-0.205736	-0.472261
0.0165915	0.0857088	-0.22552	-0.43383
0.0294698	0.0927711	-0.285368	-0.420381
0.00651959	0.0957517	-0.331937	-0.445651
-0.0051388	0.112039	-0.332253	-0.520838
0.0198448	0.145578	-0.293281	-0.601125
0.0778586	0.185762	-0.236126	-0.616787
0.136551	0.207704	-0.194634	-0.566655
0.143748	0.200357	-0.19206	-0.491939
0.094492	0.177947	-0.203963	-0.408581
0.0366932	0.169425	-0.203279	-0.333603
0.000142925	0.20503	-0.207071	-0.301174
-0.0342638	0.264685	-0.234012	-0.300027
-0.0867885	0.308911	-0.264079	-0.297783
-0.136637	0.300354	-0.27681	-0.301294
-0.151553	0.24071	-0.273006	-0.307174
-0.124663	0.159676	-0.254241	-0.282498
-0.0860213	0.100976	-0.239658	-0.239844
-0.0783631	0.0983242	-0.261371	-0.221192
-0.127737	0.121367	-0.302963	-0.220606
-0.197651	0.136957	-0.310233	-0.216916
-0.207255	0.140611	-0.274689	-0.217641
-0.125646	0.16384	-0.238871	-0.21428
-0.0212673	0.193351	-0.231282	-0.194962
0.00958291	0.210788	-0.251034	-0.198138
-0.0461336	0.214522	-0.272549	-0.253647
-0.123545	0.220075	-0.263471	-0.318825
-0.160939	0.249288	-0.226307	-0.345472
-0.141297	0.284728	-0.208901	-0.333119
-0.107966	0.292622	-0.23714	-0.297371
-0.121157	0.237145	-0.28087	-0.258953
-0.167885	0.154168	-0.306101	-0.251674
-0.178048	0.0972756	-0.304059	-0.280011
-0.149917	0.0988768	-0.278745	-0.297049
-0.136674	0.148643	-0.246731	-0.284014
-0.148817	0.200717	-0.230766	-0.27039
-0.163095	0.22638	-0.22788	-0.265514
-0.152117	0.209177	-0.212237	-0.251048
-0.0885136	0.181332	-0.183338	-0.230635
-0.00234978	0.170021	-0.164243	-0.22004
0.0103314	0.178486	-0.158676	-0.216425
-0.0722873	0.18253	-0.154973	-0.220494
-0.16527	0.17124	-0.143829	-0.237498
-0.187317	0.169043	-0.116713	-0.245011
-0.129915	0.187403	-0.0765103	-0.217487
-0.0430824	0.237851	-0.062767	-0.175288
-0.00729985	0.28591	-0.105452	-0.156997
-0.0552229	0.307814	-0.174905	-0.163179
-0.112569	0.298239	-0.222786	-0.181206
-0.100589	0.285559	-0.240377	-0.213915
-0.052999	0.288552	-0.242958	-0.252052
-0.046229	0.295575	-0.243583	-0.269403
-0.0891944	0.30282	-0.249628	-0.271886
-0.138076	0.304357	-0.254602	-0.282677
-0.138107	0.318372	-0.236726	-0.2867
-0.0575113	0.340595	-0.200405	-0.266209
0.0460692	0.361044	-0.187231	-0.226175
0.0714767	0.358874	-0.221404	-0.159912
0.00798914	0.327139	-0.271273	-0.0709177
-0.0645826	0.296117	-0.300672	-0.0173318
-0.10964	0.298631	-0.309406	-0.0428161
-0.145322	0.343194	-0.305116	-0.105168
-0.182589	0.384334	-0.29928	-0.152198
-0.217707	0.387047	-0.308069	-0.178963
-0.220034	0.345081	-0.32269	-0.179458
-0.158757	0.298891	-0.314154	-0.152707
-0.0654168	0.290566	-0.289963	-0.136341
-0.0243152	0.316544	-0.286427	-0.152155
-0.0587218	0.346005	-0.304331	-0.179784
-0.097109	0.34154	-0.318179	-0.220291
-0.0617808	0.311025	-0.316202	-0.289313
0.0381149	0.271439	-0.29672	-0.352533
0.118676	0.255029	-0.270062	-0.368197
0.113644	0.262959	-0.267442	-0.354136
0.0318914	0.282442	-0.30263	-0.326711
-0.0527552	0.292541	-0.333856	-0.276768
-0.0681006	0.287792	-0.322406	-0.222333
-0.0102173	0.292604	-0.285494	-0.184686
0.0535271	0.315566	-0.262347	-0.147845
0.0654406	0.351741	-0.26718	-0.114995
0.0568449	0.371371	-0.297935	-0.118853
0.085105	0.372545	-0.334813	-0.144539
0.14808	0.365704	-0.344834	-0.148138
0.182679	0.370946	-0.326945	-0.131358
0.147086	0.38013	-0.306351	-0.112429
0.0579748	0.353566	-0.290325	-0.0815726
-0.0152119	0.289857	-0.272832	-0.0494976
-0.00590854	0.230585	-0.263211	-0.0431627
0.0564108	0.241973	-0.268303	-0.0491209
0.0724078	0.320135	-0.278651	-0.0436451
0.0112271	0.413683	-0.294907	-0.0407277
-0.0522248	0.463218	-0.313854	-0.0595408
-0.0558498	0.453653	-0.310238	-0.0870991
-0.00134714	0.434395	-0.277882	-0.11191
0.0577417	0.447141	-0.248967	-0.13428
0.0470309	0.49589	-0.247666	-0.140128
-0.0488078	0.509036	-0.26116	-0.134336
-0.139991	0.449959	-0.271688	-0.150996
-0.140801	0.339063	-0.271407	-0.19499
-0.073094	0.243661	-0.259392	-0.217938
-0.000384673	0.207512	-0.254932	-0.191092
0.0405262	0.220659	-0.28211	-0.139244
0.0399401	0.255094	-0.318245	-0.0964442
0.0301593	0.280305	-0.32104	-0.0774818
0.0466633	0.31304	-0.297053	-0.0904257
0.0535488	0.354636	-0.291228	-0.129882
-0.00734385	0.390024	-0.322266	-0.170522
-0.0966684	0.392813	-0.372735	-0.206552
-0.126307	0.36493	-0.413281	-0.255497
-0.0768224	0.337128	-0.416732	-0.312369
-0.00221801	0.329497	-0.379331	-0.349648
0.0288523	0.359326	-0.336493	-0.364405
-0.0223221	0.399684	-0.319158	-0.362197
-0.102582	0.416644	-0.313167	-0.319563
-0.104455	0.389396	-0.30043	-0.236063
-0.0228597	0.348012	-0.29837	-0.154074
0.0466683	0.33361	-0.324622	-0.0922347
0.0573082	0.346364	-0.361232	-0.0485806
0.0519066	0.366467	-0.378867	-0.0437702
0.0702604	0.369876	-0.360287	-0.0817368
0.109695	0.370411	-0.300373	-0.118845
0.133709	0.378424	-0.232146	-0.132694
0.091712	0.399405	-0.209305	-0.145004
-0.00824423	0.405334	-0.232814	-0.163269
-0.081214	0.379632	-0.256562	-0.180274
-0.0607584	0.334289	-0.259655	-0.203041
0.0223127	0.2966	-0.265372	-0.212692
0.0785612	0.291699	-0.287692	-0.177907
0.0518401	0.310357	-0.323711	-0.128658
-0.0350391	0.329886	-0.362512	-0.114969
-0.107645	0.315048	-0.37853	-0.120753
-0.114978	0.271936	-0.356434	-0.105254
-0.0679308	0.228541	-0.322571	-0.0697071
-0.0274857	0.210514	-0.312448	-0.0206279
-0.021827	0.211838	-0.32733	0.0348443
-0.0131039	0.203298	-0.350563	0.0519815
0.0378906	0.183024	-0.368443	0.0106373
0.0863577	0.160728	-0.366852	-0.0396609
0.049531	0.161334	-0.351147	-0.0658115
-0.0659923	0.177357	-0.353222	-0.0797551
-0.166402	0.187888	-0.38343	-0.0747696
-0.169776	0.174583	-0.40622	-0.0384131
-0.08082	0.156223	-0.3988	0.00238033
0.023453	0.171003	-0.377754	0.0295776
0.0588428	0.212475	-0.378334	0.0650779
0.0222993	0.256224	-0.43166	0.111043
-0.0101998	0.257405	-0.520376	0.146991
-0.0059479	0.21904	-0.569512	0.182378
-0.0151969	0.166864	-0.535977	0.225709
-0.0670139	0.141193	-0.482263	0.259279
-0.1311	0.145644	-0.483003	0.278262
-0.168529	0.147741	-0.527752	0.307348
-0.135438	0.129912	-0.559924	0.352668
-0.0174911	0.0950145	-0.550293	0.407023
0.111096	0.0864742	-0.508744	0.489002
0.173217	0.12023	-0.469777	0.607266
0.182325	0.190745	-0.466774	0.724253
0.189975	0.253999	-0.493252	0.808934
0.203631	0.269517	-0.504952	0.876499
0.21133	0.247438	-0.484124	0.944649
0.189183	0.22904	-0.458274	1.01529
0.124728	0.249252	-0.445383	1.0988
0.0776771	0.276616	-0.432556	1.2025
0.121987	0.282502	-0.410595	1.30988
0.226894	0.255669	-0.379596	1.41538
0.295053	0.219648	-0.34023	1.54121
0.29305	0.194225	-0.311355	1.68052
0.25423	0.172568	-0.321063	1.79798
0.232071	0.147952	-0.363028	1.89066
0.272583	0.113645	-0.397789	1.97544
0.356298	0.101991	-0.405323	2.04623
0.386792	0.123649	-0.399685	2.09525
0.319145	0.162979	-0.393977	2.14357
0.226907	0.178644	-0.393274	2.19546
0.185494	0.158762	-0.395356	2.24008
0.201806	0.123714	-0.376488	2.30313
0.245258	0.102071	-0.322708	2.411
0.283679	0.115072	-0.269263	2.54356
0.306957	0.140551	-0.256114	2.69065
0.349437	0.156927	-0.257409	2.87674
0.438806	0.161931	-0.233362	3.10014
0.52116	0.191641	-0.189715	3.33693
0.522407	0.264628	-0.145057	3.59873
0.446339	0.367722	-0.105928	3.89543
0.381412	0.468748	-0.0786171	4.19283
0.405515	0.542555	-0.0488802	4.47472
0.520324	0.609771	0.015219	4.75369
0.6606	0.697376	0.103023	5.01144
0.755614	0.819948	0.16532	5.2288
0.78393	0.938003	0.191981	5.42613
0.788959	1.01482	0.220315	5.60309
0.834115	1.04779	0.278851	5.72785
0.915727	1.07351	0.367447	5.82099
0.975644	1.14253	0.469011	5.93749
0.993489	1.26485	0.547043	6.08406
1.00834	1.41581	0.58679	6.25288
1.05433	1.53995	0.625991	6.45412
1.1241	1.63602	0.697549	6.66288
1.18883	1.72472	0.782249	6.83735
1.21498	1.82126	0.850225	6.98772
1.2122	1.90119	0.905997	7.13041
1.24765	1.94529	0.960641	7.24919
1.35069	1.97715	1.02731	7.34594
1.45079	2.02975	1.11958	7.45681
1.47461	2.13505	1.2146	7.58735
1.44438	2.26602	1.27358	7.72099
1.4167	2.38515	1.30257	7.86911
1.4241	2.46601	1.33887	8.03367
1.47165	2.5249	1.40053	8.18123
1.5249	2.59224	1.48427	8.29376
1.53311	2.66969	1.57503	8.38721
1.52266	2.75634	1.63982	8.46559
1.55761	2.83325	1.667	8.5242
1.62785	2.90051	1.69395	8.59142
1.68872	2.95105	1.75664	8.69443
1.72181	3.00348	1.83875	8.81816
1.71698	3.07012	1.90526	8.94385
1.69118	3.13592	1.95086	9.06769
1.70572	3.1898	1.988	9.15944
1.76932	3.22701	2.01931	9.18564
1.80953	3.27444	2.04215	9.17215
1.7919	3.3318	2.05249	9.16709
1.75493	3.39543	2.04056	9.17801
1.74193	3.43407	2.02031	9.19486
1.77687	3.43419	2.03066	9.22464
1.8509	3.42007	2.07864	9.2551
1.89442	3.4301	2.1247	9.27406
1.85688	3.4855	2.14016	9.31133
1.79029	3.55572	2.13712	9.3837
1.77845	3.6215	2.1389	9.45313
1.82795	3.6786	2.15547	9.49519
1.89636	3.74537	2.18922	9.53165
1.96178	3.82767	2.21725	9.56511
2.00579	3.90673	2.21043	9.57572
2.03006	3.94794	2.18619	9.58076
2.05908	3.92905	2.19358	9.59973
2.0868	3.88759	2.23996	9.62145
2.07562	3.86594	2.28775	9.6571
2.03312	3.8976	2.31407	9.72888
2.00922	3.97292	2.31539	9.80228
2.02385	4.06034	2.29905	9.84149
2.05482	4.1259	2.30158	9.87208
2.06814	4.16725	2.3468	9.91174
2.04976	4.20911	2.39709	9.93577
2.01843	4.25249	2.40596	9.94989
2.00907	4.28937	2.38448	9.97502
2.03899	4.29611	2.36922	9.98449
2.0825	4.28398	2.37674	9.96619
2.09168	4.26898	2.40377	9.95406
2.05006	4.27048	2.42461	9.95266
2.00545	4.28872	2.40655	9.93718
1.99177	4.31027	2.35462	9.9236
1.9905	4.33143	2.31655	9.93053
1.98244	4.35312	2.30963	9.93492
1.96391	4.38643	2.31033	9.93082
1.9412	4.41017	2.30802	9.94165
1.93258	4.41562	2.31086	9.94771
1.95729	4.39851	2.3258	9.91767
1.98671	4.36999	2.35964	9.87573
1.98401	4.35682	2.40253	9.84635
1.96555	4.37756	2.409	9.81338
1.96054	4.42671	2.35336	9.77148
1.96014	4.45137	2.27686	9.72955
1.95814	4.43771	2.22561	9.67704
1.96852	4.4031	2.20867	9.61284
1.98067	4.39027	2.21945	9.57414
1.97657	4.40881	2.23958	9.57274
1.96841	4.43403	2.24437	9.57673
1.96504	4.44665	2.23856	9.57473
1.95167	4.43461	2.24657	9.58258
1.94001	4.42738	2.26074	9.59072
1.94857	4.43293	2.25083	9.56803
1.95921	4.44527	2.21751	9.50925
1.97167	4.43236	2.18608	9.42804
1.99842	4.39765	2.17237	9.34135
2.00906	4.36637	2.17926	9.28793
1.97682	4.3538	2.19956	9.30612
1.9346	4.36808	2.20203	9.36261
1.90708	4.38061	2.16354	9.39035
1.87998	4.37251	2.10705	9.37552
1.86069	4.34169	2.06508	9.33974
1.8644	4.33008	2.03207	9.28928
1.8754	4.36603	1.99092	9.23605
1.88162	4.43262	1.95737	9.2022
1.89735	4.4852	1.9533	9.17332
1.91475	4.47943	1.98302	9.13036
1.92227	4.42791	2.03759	9.11048
1.93789	4.36433	2.08571	9.13888
1.96558	4.33623	2.08462	9.17589
1.97093	4.3399	2.03001	9.18627
1.93829	4.33649	1.96984	9.1744
1.89027	4.30056	1.94148	9.13639
1.83544	4.25027	1.93095	9.07583
1.78816	4.22512	1.91792	9.03192
1.7878	4.2273	1.89689	9.01383
1.83128	4.2345	1.8634	8.98672
1.86459	4.20358	1.82822	8.96005
1.85705	4.14787	1.81905	8.96794
1.82684	4.11287	1.83335	8.98161
1.80056	4.13233	1.83608	8.96705
1.79625	4.1821	1.81912	8.93835
1.80855	4.20597	1.79737	8.89758
1.81848	4.17768	1.77338	8.82999
1.81518	4.11395	1.74649	8.76615
1.80648	4.06625	1.72012	8.73257
1.80882	4.04332	1.68143	8.69591
1.81593	4.02994	1.63003	8.63988
1.79899	4.00105	1.60296	8.59384
1.74273	3.96844	1.62617	8.55986
1.68458	3.97315	1.67166	8.53092
1.65096	4.0234	1.68984	8.53246
1.63401	4.08003	1.65941	8.56398
1.62749	4.07835	1.59141	8.57931
1.61222	4.01715	1.52234	8.5703
1.55529	3.93516	1.4979	8.56552
1.46673	3.89797	1.51633	8.55881
1.40109	3.91532	1.5364	8.53339
1.38668	3.93345	1.54241	8.51529
1.41287	3.90645	1.54587	8.51711
1.46827	3.84017	1.53932	8.52567
1.53193	3.79916	1.50881	8.54849
1.57627	3.80894	1.4611	8.58721
1.60169	3.85921	1.40424	8.60031
1.61749	3.89393	1.3538	8.55791
1.60304	3.88654	1.34579	8.49444
1.56205	3.86003	1.38447	8.44257
1.54611	3.86243	1.42328	8.39576
1.57475	3.91327	1.43108	8.34866
1.61304	3.95139	1.41855	8.31027
1.63441	3.92687	1.39763	8.28154
1.62111	3.84249	1.36826	8.26862
1.55492	3.76813	1.3377	8.28734
1.47414	3.75696	1.30716	8.31948
1.43366	3.80642	1.27081	8.31928
1.42777	3.85738	1.2489	8.28578
1.43143	3.84883	1.27332	8.26408
1.4481	3.80701	1.32784	8.26569
1.46992	3.77573	1.36639	8.258
1.48722	3.77606	1.37292	8.22546
1.51867	3.7713	1.36282	8.16172
1.55682	3.73766	1.35075	8.06708
1.55839	3.68941	1.34563	7.9783
1.52553	3.66036	1.34158	7.93511
1.51527	3.66982	1.31074	7.91085
1.53979	3.68414	1.24544	7.85823
1.56245	3.6722	1.19344	7.7888
1.55717	3.62274	1.19993	7.72305
1.51072	3.58211	1.24929	7.64864
1.43152	3.58803	1.29007	7.57049
1.36075	3.63473	1.29243	7.50577
1.33415	3.67419	1.25659	7.44437
1.32107	3.66168	1.19862	7.39315
1.29246	3.60703	1.15617	7.39276
1.27442	3.55548	1.1495	7.43807
1.29304	3.55102	1.15222	7.47541
1.34116	3.56573	1.14115	7.50275
1.39804	3.55282	1.1315	7.54677
1.44112	3.48837	1.12764	7.58363
1.45038	3.40746	1.10746	7.58831
1.43666	3.37751	1.06566	7.57547
1.42671	3.42102	1.01514	7.54057
1.44006	3.49572	0.969517	7.47976
1.46367	3.52625	0.954587	7.43722
1.46424	3.50425	0.986267	7.43681
1.43637	3.46865	1.03297	7.43906
1.3983	3.47098	1.05629	7.42601
1.35911	3.49766	1.06484	7.41414
1.32505	3.4965	1.0783	7.39007
1.31592	3.44872	1.09674	7.34506
1.32804	3.37658	1.1115	7.31296
1.34455	3.32329	1.11013	7.29025
1.37318	3.29238	1.07607	7.23086
1.39996	3.27156	1.01959	7.13594
1.39083	3.22743	0.982106	7.04365
1.34989	3.17291	0.97328	6.95896
1.31014	3.1427	0.963009	6.87508
1.27534	3.15246	0.935191	6.81788
1.24378	3.18911	0.89282	6.79541
1.23744	3.20344	0.843133	6.78691
1.25522	3.17659	0.809444	6.78925
1.27092	3.12484	0.813537	6.79887
1.2764	3.11243	0.838474	6.78329
1.27268	3.15616	0.85812	6.73387
1.24874	3.20687	0.877402	6.68742
1.22344	3.2057	0.89919	6.65772
1.21663	3.14807	0.90828	6.62022
1.20003	3.10151	0.900302	6.57378
1.16117	3.10022	0.880539	6.53244
1.14076	3.13432	0.84229	6.48452
1.14998	3.13977	0.791742	6.42151
1.14595	3.08811	0.759661	6.36895
1.13025	3.01591	0.762106	6.3347
1.13615	2.98774	0.775015	6.30059
1.157	3.02562	0.774922	6.26966
1.17568	3.07266	0.768346	6.26426
1.184	3.08763	0.767562	6.27203
1.15984	3.06321	0.777196	6.26344
1.11191	3.04636	0.799908	6.23858
1.09268	3.06198	0.8196	6.18832
1.1008	3.09126	0.815412	6.09263
1.08399	3.08843	0.803052	5.98287
1.03888	3.02313	0.817695	5.90795
1.01489	2.9269	0.853951	5.85994
1.03	2.85486	0.868058	5.81295
1.07429	2.8512	0.843193	5.78046
1.13672	2.89287	0.797106	5.76195
1.18417	2.93744	0.748162	5.72925
1.18989	2.94487	0.707921	5.68838
1.17092	2.91579	0.68652	5.65162
1.16003	2.88981	0.677898	5.59994
1.15246	2.88282	0.66841	5.54274
1.13757	2.87376	0.671485	5.52665
1.12461	2.82912	0.700608	5.54887
1.11224	2.76568	0.726734	5.56688
1.08757	2.71048	0.723061	5.57081
1.05013	2.6907	0.70081	5.56265
1.01231	2.69187	0.673256	5.51772
0.980412	2.67813	0.645146	5.44364
0.957959	2.64483	0.634168	5.37387
0.946516	2.61836	0.630962	5.30366
0.943851	2.63483	0.602162	5.23134
0.931928	2.67752	0.553492	5.20311
0.88643	2.7114	0.527908	5.23057
0.827565	2.70113	0.540196	5.26456
0.791123	2.66536	0.568264	5.27894
0.793145	2.64206	0.588321	5.28039
0.838909	2.64894	0.576062	5.26237
0.919614	2.67018	0.533539	5.23326
0.980715	2.65851	0.504203	5.22749
0.974406	2.61259	0.514667	5.2359
0.927825	2.56374	0.539475	5.21992
0.885927	2.55205	0.551907	5.18411
0.867864	2.56667	0.560255	5.15135
0.881825	2.58701	0.568013	5.11445
0.913287	2.59931	0.567413	5.06919
0.916447	2.59188	0.562506	5.03409
0.890448	2.58056	0.542543	5.00578
0.880778	2.56062	0.485286	4.96448
0.890439	2.52808	0.406795	4.92847
0.882875	2.46731	0.349574	4.91457
0.849345	2.40635	0.322663	4.89901
0.805699	2.38825	0.307769	4.86682
0.754807	2.42972	0.288547	4.83831
0.719487	2.50081	0.262859	4.81185
0.71927	2.53803	0.257003	4.76877
0.721058	2.52395	0.302775	4.72182
0.704651	2.4736	0.373788	4.68817
0.704105	2.44287	0.402079	4.65236
0.733806	2.44028	0.368786	4.61048
0.76963	2.43186	0.317986	4.59301
0.81255	2.3896	0.284834	4.5956
0.860773	2.32828	0.263517	4.57092
0.891204	2.29486	0.238064	4.50578
0.909933	2.29721	0.205877	4.43025
0.924914	2.31813	0.171766	4.36791
0.895812	2.31013	0.148378	4.33758
0.814627	2.26742	0.155249	4.3638
0.744978	2.22172	0.183233	4.41516
0.727985	2.21033	0.197767	4.42248
0.751546	2.23874	0.183825	4.37787
0.792632	2.26537	0.157696	4.31166
0.8321	2.26528	0.133186	4.22774
0.848568	2.24072	0.108035	4.13817
0.841606	2.22671	0.0876467	4.08292
0.83354	2.23343	0.0796153	4.05897
0.820423	2.25471	0.0763164	4.03226
0.785666	2.26054	0.0787035	4.0034
0.736886	2.22735	0.0946468	3.97242
0.695516	2.16858	0.111383	3.90733
0.670444	2.10632	0.103674	3.82047
0.671785	2.06945	0.082062	3.76215
0.707348	2.0607	0.0719551	3.73196
0.748461	2.0711	0.0747868	3.70258
0.75859	2.08227	0.0869732	3.68175
0.738512	2.1126	0.107539	3.6694
0.723608	2.16915	0.112668	3.64
0.721277	2.21276	0.089831	3.60936
0.707043	2.20389	0.0729325	3.6098
0.669324	2.13675	0.0841957	3.61707
0.640376	2.05739	0.105836	3.60476
0.649148	2.00031	0.121955	3.59121
0.681344	1.98248	0.127506	3.57674
0.714552	1.97938	0.109093	3.54434
0.723758	1.97148	0.0635674	3.51432
0.696268	1.9564	0.00855404	3.50301
0.661252	1.94811	-0.0448084	3.48616
0.652202	1.96404	-0.0871604	3.4587
0.648465	1.97845	-0.101149	3.45112
0.627494	1.98112	-0.0846883	3.46285
0.613434	1.97747	-0.0505164	3.47258
0.618874	1.99154	-0.0118581	3.48731
0.634149	2.01324	0.0108836	3.50033
0.661346	2.01865	-0.0104836	3.47565
0.689914	1.99538	-0.062358	3.40448
0.690041	1.94604	-0.0856356	3.31838
0.670356	1.91791	-0.0579802	3.23335
0.667206	1.92528	-0.0171858	3.14935
0.671597	1.94848	0.0047233	3.08705
0.645652	1.93426	0.00149087	3.0608
0.575837	1.8708	-0.0259457	3.05131
0.47766	1.79077	-0.0598449	3.04414
0.385944	1.74013	-0.0788841	3.04441
0.363914	1.75475	-0.0948161	3.03994
0.436777	1.81735	-0.124937	3.00992
0.534945	1.89588	-0.150549	2.96409
0.592186	1.94189	-0.145469	2.92009
0.609493	1.95767	-0.12121	2.87021
0.604631	1.95912	-0.104005	2.8095
0.593465	1.94744	-0.0988192	2.76025
0.598191	1.91801	-0.100085	2.72486
0.600335	1.8721	-0.100304	2.68451
0.559435	1.83738	-0.0900225	2.65021
0.495752	1.82374	-0.0719676	2.63772
0.454516	1.8342	-0.071516	2.63044
0.436207	1.83082	-0.0999761	2.61976
0.432238	1.79197	-0.128645	2.63126
0.449516	1.73797	-0.137344	2.65635
0.463637	1.70638	-0.143997	2.65553
0.452625	1.71811	-0.162789	2.62899
0.435796	1.74709	-0.187474	2.59353
0.432608	1.76985	-0.205653	2.54121
0.43154	1.77424	-0.204663	2.4814
0.42375	1.78363	-0.168824	2.43449
0.42447	1.80218	-0.111634	2.37558
0.434525	1.81488	-0.0757314	2.2851
0.441287	1.79717	-0.0770154	2.2118
0.437339	1.74219	-0.0987347	2.19584
0.427944	1.67928	-0.125116	2.20837
0.41878	1.63029	-0.163144	2.21834
0.427201	1.60846	-0.200808	2.21783
0.464737	1.59683	-0.233103	2.18152
0.502548	1.58737	-0.264798	2.10651
0.494677	1.57417	-0.276073	2.03582
0.43326	1.56912	-0.245734	1.99168
0.354435	1.5792	-0.202264	1.96566
0.287849	1.59139	-0.189656	1.97598
0.241405	1.59473	-0.210781	2.03162
0.220808	1.57574	-0.249468	2.08601
0.236308	1.55351	-0.287358	2.10785
0.283643	1.5408	-0.302821	2.11549
0.345837	1.54259	-0.305223	2.11014
0.415737	1.53446	-0.324042	2.07925
0.467316	1.50579	-0.352059	2.04947
0.466526	1.47337	-0.349093	2.03786
0.428809	1.46165	-0.316215	2.02452
0.395671	1.492	-0.291143	2.00474
0.384038	1.52882	-0.292453	1.99563
0.400525	1.54031	-0.320645	1.98511
0.448319	1.51108	-0.365087	1.95897
0.483937	1.46454	-0.396355	1.942
0.472415	1.42926	-0.399816	1.94049
0.437194	1.42439	-0.401034	1.91636
0.404368	1.45144	-0.416028	1.85142
0.362014	1.47177	-0.426828	1.76511
0.312854	1.46857	-0.430349	1.67156
0.286372	1.43194	-0.441653	1.57714
0.292953	1.38214	-0.458785	1.51061
0.333225	1.33263	-0.478606	1.48511
0.386066	1.29176	-0.506594	1.47253
0.399333	1.26111	-0.520618	1.45323
0.343403	1.23634	-0.490968	1.4365
0.267611	1.23373	-0.435998	1.41824
0.231645	1.25221	-0.400267	1.38694
0.229704	1.28435	-0.401798	1.35475
0.242081	1.29244	-0.422995	1.32548
0.257485	1.27356	-0.439924	1.2798
0.254713	1.25339	-0.436581	1.22761
0.241062	1.24785	-0.417627	1.21108
0.264695	1.25446	-0.413241	1.22749
0.325674	1.2392	-0.445339	1.238
0.378205	1.18866	-0.492507	1.23992
0.411679	1.11579	-0.518891	1.24545
0.439112	1.07752	-0.527321	1.24197
0.457156	1.09008	-0.550196	1.2314
0.465754	1.12575	-0.588002	1.23158
0.464038	1.1545	-0.614975	1.22872
0.42104	1.17695	-0.61568	1.20798
0.339338	1.22453	-0.582645	1.2006
0.277821	1.29422	-0.525594	1.21254
0.279601	1.3472	-0.482003	1.19288
0.321477	1.3235	-0.476507	1.11971
0.35784	1.22766	-0.489216	1.02166
0.369433	1.11828	-0.503325	0.92307
0.355237	1.06609	-0.533798	0.856104
0.329005	1.08376	-0.580911	0.858396
0.313147	1.12327	-0.619818	0.907631
0.306053	1.14867	-0.637391	0.943694
0.284327	1.15367	-0.628298	0.963977
0.250966	1.17267	-0.58847	0.995098
0.247745	1.22023	-0.552021	1.01418
0.292892	1.27443	-0.567081	0.995129
0.351926	1.28545	-0.619755	0.951167
0.369365	1.24896	-0.656967	0.887398
0.326	1.21121	-0.657479	0.810731
0.248612	1.2056	-0.632415	0.764376
0.188693	1.2363	-0.59889	0.761206
0.184064	1.25618	-0.586	0.755265
0.212184	1.23328	-0.594509	0.723115
0.217076	1.17472	-0.581316	0.687723
0.187125	1.1354	-0.536087	0.653831
0.182809	1.14042	-0.501356	0.615582
0.234473	1.16268	-0.507037	0.586669
0.302109	1.16674	-0.539341	0.556894
0.336315	1.14112	-0.569216	0.501721
0.309686	1.13055	-0.571695	0.441396
0.231703	1.15083	-0.544573	0.413135
0.164031	1.18658	-0.529058	0.409515
0.163643	1.18378	-0.555988	0.402597
0.206679	1.11839	-0.593009	0.403252
0.243447	1.03023	-0.597038	0.43175
0.270529	0.98626	-0.578096	0.487187
0.309229	1.0185	-0.571058	0.561008
0.369425	1.06915	-0.591103	0.629536
0.444185	1.08485	-0.635014	0.645817
0.489296	1.04355	-0.672867	0.589151
0.454312	0.987375	-0.662873	0.503753
0.37964	0.969825	-0.613478	0.433674
0.353191	1.00702	-0.584551	0.369234
0.380351	1.06398	-0.601795	0.295471
0.386497	1.08074	-0.635004	0.224676
0.333374	1.05473	-0.653526	0.15743
0.250347	1.00981	-0.655752	0.0904925
0.191062	0.98411	-0.657101	0.0444146
0.202827	0.964351	-0.67738	0.0190494
0.263211	0.929021	-0.718831	-0.016307
0.284133	0.884172	-0.753911	-0.0593509
0.236642	0.86178	-0.74896	-0.0712442
0.186434	0.898741	-0.713221	-0.0505669
0.174896	0.965934	-0.694211	-0.0306724
0.181922	1.00606	-0.720009	-0.0221663
0.182582	0.979122	-0.774592	-0.0404168
0.155488	0.92603	-0.823567	-0.105
0.0990625	0.896676	-0.838722	-0.182837
0.0660606	0.900416	-0.812403	-0.222577
0.105179	0.907319	-0.774798	-0.232687
0.171612	0.882016	-0.76391	-0.238175
0.193006	0.837682	-0.765494	-0.221751
0.171003	0.805505	-0.747454	-0.182332
0.161994	0.809901	-0.726509	-0.159512
0.212824	0.830344	-0.739494	-0.167702
0.305388	0.841471	-0.786243	-0.197511
0.364304	0.827735	-0.8376	-0.249982
0.31308	0.800246	-0.86735	-0.29487
0.168936	0.783679	-0.854243	-0.281498
0.0456813	0.772833	-0.811185	-0.224791
0.0282515	0.752994	-0.790803	-0.185885
0.0796097	0.702037	-0.81752	-0.18469
0.106656	0.641156	-0.855161	-0.213696
0.082699	0.607172	-0.874086	-0.273314
0.0514829	0.621605	-0.88362	-0.333218
0.0628345	0.6476	-0.894384	-0.354165
0.109189	0.634528	-0.913457	-0.358032
0.132369	0.581804	-0.942963	-0.377914
0.0764237	0.523937	-0.958037	-0.391358
-0.0314114	0.512179	-0.940286	-0.379813
-0.0840349	0.540061	-0.921307	-0.370163
-0.0275604	0.572144	-0.934264	-0.385045
0.071831	0.570017	-0.960051	-0.433261
0.117146	0.553725	-0.975327	-0.523214
0.0948682	0.559802	-0.975067	-0.628087
0.0535071	0.591038	-0.955236	-0.689698
0.0433733	0.620131	-0.928595	-0.704205
0.0780575	0.605344	-0.92314	-0.714673
0.0973514	0.565986	-0.936708	-0.735111
0.044176	0.541928	-0.938221	-0.759117
-0.033605	0.57308	-0.924039	-0.795438
-0.0455895	0.63755	-0.915405	-0.84476
0.00929041	0.668918	-0.917583	-0.877965
0.063065	0.631085	-0.926568	-0.885231
0.0624319	0.553205	-0.940716	-0.88448
0.00787282	0.509415	-0.944763	-0.873475
-0.0331885	0.51368	-0.935583	-0.845583
0.0166732	0.542543	-0.943509	-0.825304
0.130059	0.546722	-0.979185	-0.831047
0.185688	0.519026	-1.00211	-0.835014
0.126803	0.497902	-0.982864	-0.817509
0.018581	0.519724	-0.941389	-0.805877
-0.041584	0.578636	-0.910722	-0.830448
-0.00538023	0.610599	-0.908151	-0.893789
0.087389	0.585538	-0.934147	-0.983266
0.131011	0.513076	-0.960856	-1.06021
0.0704044	0.447842	-0.952171	-1.06599
-0.00936138	0.411015	-0.91146	-1.00375
-0.00675993	0.388619	-0.881177	-0.948325
0.0578436	0.354315	-0.890637	-0.946332
0.0978929	0.296294	-0.92285	-0.97849
0.0734872	0.259888	-0.94586	-1.017
0.00637512	0.277648	-0.95313	-1.04708
-0.0394574	0.330708	-0.956276	-1.05845
-0.0181008	0.352654	-0.976346	-1.08145
0.0181378	0.317638	-1.02347	-1.15109
-0.00880384	0.253369	-1.06895	-1.22465
-0.0802293	0.215801	-1.07028	-1.23678
-0.100294	0.237151	-1.03133	-1.2023
-0.0352969	0.273805	-1.00236	-1.17251
0.0547629	0.277893	-1.00267	-1.1619
0.0857855	0.242099	-1.01161	-1.17033
0.0250951	0.21598	-1.01046	-1.18747
-0.066334	0.227207	-0.993778	-1.17264
-0.087644	0.267824	-0.96964	-1.12181
-0.0117736	0.299348	-0.967503	-1.09919
0.0661009	0.30189	-1.00401	-1.13617
0.042915	0.297703	-1.04331	-1.19749
-0.0625089	0.305837	-1.04775	-1.25289
-0.13459	0.337396	-1.03468	-1.28859
-0.106739	0.359215	-1.0387	-1.28671
-0.0283302	0.347915	-1.06441	-1.25987
4.96876e-05	0.308273	-1.09962	-1.24287
-0.0767921	0.280217	-1.12197	-1.2242
-0.202342	0.281753	-1.10049	-1.17928
-0.260646	0.296168	-1.0469	-1.14105
-0.209541	0.295072	-1.00834	-1.14877
-0.138777	0.250773	-1.00146	-1.1878
-0.155073	0.193732	-1.00993	-1.23994
-0.245593	0.163328	-1.02141	-1.30119
-0.312885	0.174905	-1.02438	-1.34801
-0.28267	0.191443	-1.00908	-1.37028
-0.168467	0.180856	-1.00171	-1.39358
-0.060037	0.149111	-1.02463	-1.42306
-0.0425954	0.126702	-1.05135	-1.42985
-0.092332	0.15443	-1.05321	-1.41688
-0.0954131	0.215164	-1.03896	-1.41655
-0.0147815	0.270724	-1.0266	-1.43118
0.0583245	0.276193	-1.02579	-1.44776
0.0307045	0.25113	-1.04216	-1.46339
-0.0888717	0.246087	-1.06004	-1.47077
-0.196734	0.272153	-1.04723	-1.45857
-0.178668	0.303929	-1.0098	-1.44302
-0.0453364	0.304963	-0.987541	-1.45089
0.055268	0.280998	-0.99075	-1.46728
0.0246458	0.247161	-0.996126	-1.45811
-0.0711511	0.233989	-0.991159	-1.42342
-0.105357	0.223038	-0.973818	-1.38368
-0.0463454	0.181376	-0.948254	-1.34848
0.0375731	0.116265	-0.938383	-1.33292
0.0532408	0.0661125	-0.962718	-1.35094
-0.0156761	0.0690285	-0.996257	-1.38382
-0.0706434	0.105997	-1.0052	-1.41005
-0.0220987	0.140931	-0.995218	-1.44623
0.0693907	0.140206	-0.990881	-1.50418
0.069366	0.126253	-0.996558	-1.54887
-0.0378859	0.136892	-1.00447	-1.5597
-0.146487	0.179195	-1.00887	-1.55647
-0.158001	0.223066	-1.00123	-1.5499
-0.071169	0.21249	-0.978097	-1.53653
0.0175834	0.15707	-0.955073	-1.52513
-0.00206551	0.107464	-0.95396	-1.50904
-0.103859	0.112659	-0.965421	-1.45947
-0.145141	0.153443	-0.970333	-1.39475
-0.0727326	0.180626	-0.970919	-1.36587
0.0150568	0.154517	-0.969205	-1.37222
0.00273066	0.0906875	-0.955228	-1.38455
-0.116377	0.0491914	-0.929768	-1.40395
-0.239174	0.0482726	-0.900949	-1.42989
-0.2398	0.0669708	-0.862129	-1.4527
-0.100274	0.0596928	-0.821173	-1.49483
0.0470621	0.0243268	-0.81474	-1.56717
0.0608278	-0.00468912	-0.848888	-1.62489
-0.0533576	0.0187865	-0.888813	-1.63808
-0.157613	0.0851703	-0.913898	-1.641
-0.149463	0.133054	-0.931901	-1.66122
-0.0613427	0.117495	-0.948212	-1.69071
0.00278273	0.0426912	-0.973591	-1.72304
-0.0159529	-0.0257741	-1.01712	-1.73786
-0.0759324	-0.0523805	-1.05217	-1.70253
-0.0816961	-0.0528195	-1.04311	-1.63976
0.00634623	-0.0653931	-1.00226	-1.6123
0.0932152	-0.0931751	-0.967994	-1.62888
0.0653307	-0.10399	-0.954889	-1.65815
-0.0605761	-0.0773404	-0.970565	-1.703
-0.15938	-0.028531	-1.01241	-1.77406
-0.149899	-0.0198387	-1.05408	-1.86009
-0.079292	-0.0603849	-1.08492	-1.96615
-0.0511697	-0.11811	-1.11965	-2.09162
-0.118276	-0.141161	-1.14867	-2.18727
-0.209165	-0.11753	-1.14264	-2.21392
-0.195889	-0.0815638	-1.10988	-2.18048
-0.0621204	-0.0751708	-1.08008	-2.1033
0.0576814	-0.10959	-1.061	-1.99706
0.048681	-0.129036	-1.05703	-1.91226
-0.0539648	-0.0999362	-1.07214	-1.90664
-0.141722	-0.027881	-1.09096	-1.97636
-0.142427	0.0189335	-1.1019	-2.07491
-0.0787323	-0.00177899	-1.11766	-2.15894
-0.0527142	-0.0638553	-1.13863	-2.19447
-0.134212	-0.114458	-1.14308	-2.15938
-0.246424	-0.119156	-1.12376	-2.06954
-0.263931	-0.105495	-1.09267	-1.96701
-0.174397	-0.110144	-1.05506	-1.87113
-0.0682826	-0.150988	-1.02597	-1.78196
-0.0388012	-0.178486	-1.03621	-1.71168
-0.104456	-0.155429	-1.08262	-1.66721
-0.193501	-0.10521	-1.12044	-1.63363
-0.209216	-0.07906	-1.12375	-1.6133
-0.15478	-0.119636	-1.10815	-1.61912
-0.129533	-0.19144	-1.09034	-1.63248
-0.176476	-0.235801	-1.0698	-1.63676
-0.229067	-0.208944	-1.04763	-1.65036
-0.220116	-0.146468	-1.03216	-1.68183
-0.153891	-0.0991788	-1.03082	-1.70484
-0.0926224	-0.0864223	-1.05389	-1.71312
-0.112445	-0.0897074	-1.09989	-1.72182
-0.211237	-0.0839523	-1.13894	-1.72731
-0.268156	-0.0924246	-1.13923	-1.73783
-0.194205	-0.12763	-1.11036	-1.78962
-0.0682021	-0.178617	-1.08938	-1.8827
-0.0287136	-0.205338	-1.08907	-1.96657
-0.099652	-0.189766	-1.10216	-2.01565
-0.197846	-0.144243	-1.12953	-2.0392
-0.222421	-0.111992	-1.1588	-2.03532
-0.153279	-0.125926	-1.17298	-2.0094
-0.0781074	-0.16696	-1.18462	-1.98511
-0.0925918	-0.207191	-1.21219	-1.95441
-0.173762	-0.224156	-1.2373	-1.89897
-0.204862	-0.239315	-1.2398	-1.84691
-0.13898	-0.288378	-1.23117	-1.82375
-0.0546874	-0.379546	-1.2221	-1.8054
-0.0517951	-0.462412	-1.21537	-1.77321
-0.127492	-0.473874	-1.2245	-1.74425
-0.18914	-0.414712	-1.24971	-1.7263
-0.148678	-0.338199	-1.26245	-1.72033
-0.0124224	-0.317785	-1.25641	-1.7425
0.104094	-0.351256	-1.25246	-1.78007
0.0806398	-0.393589	-1.2511	-1.79536
-0.0728404	-0.394856	-1.2404	-1.79666
-0.213978	-0.355377	-1.22936	-1.82122
-0.2378	-0.317753	-1.2273	-1.8615
-0.172047	-0.312762	-1.2257	-1.89033
-0.120228	-0.327381	-1.2291	-1.90711
-0.150887	-0.318979	-1.23915	-1.91418
-0.229954	-0.30105	-1.22873	-1.90544
-0.257794	-0.296097	-1.19626	-1.89711
-0.187745	-0.327333	-1.17451	-1.90014
-0.102735	-0.373151	-1.17251	-1.88889
-0.0989261	-0.384821	-1.1725	-1.85934
-0.146995	-0.343193	-1.1694	-1.8464
-0.142564	-0.28025	-1.15838	-1.8634
-0.0508796	-0.258408	-1.13001	-1.88572
0.0667596	-0.286696	-1.10552	-1.89702
0.113586	-0.345521	-1.11623	-1.8998
0.0384831	-0.390836	-1.15392	-1.88755
-0.0927483	-0.412515	-1.19562	-1.86793
-0.159862	-0.421698	-1.2325	-1.86709
-0.137809	-0.421659	-1.25165	-1.88235
-0.111571	-0.420821	-1.2397	-1.88014
-0.143277	-0.400403	-1.21246	-1.85354
-0.208038	-0.363312	-1.19287	-1.82742
-0.235611	-0.330049	-1.17592	-1.8105
-0.168405	-0.352378	-1.15675	-1.80455
-0.0477992	-0.42898	-1.15807	-1.82341
0.000860224	-0.517219	-1.1942	-1.85996
-0.0763212	-0.574778	-1.24543	-1.88269
-0.1857	-0.581738	-1.28324	-1.89399
-0.208867	-0.572983	-1.28495	-1.91464
-0.148008	-0.565113	-1.24641	-1.9253
-0.0912721	-0.554203	-1.19915	-1.89962
-0.112666	-0.515922	-1.19195	-1.84828
-0.202015	-0.4674	-1.23312	-1.78975
-0.256241	-0.451988	-1.279	-1.73118
-0.186	-0.494875	-1.29333	-1.69814
-0.0567734	-0.573192	-1.28515	-1.70656
-0.0119003	-0.624026	-1.27222	-1.71996
-0.0906996	-0.623069	-1.25664	-1.71927
-0.207022	-0.576682	-1.2362	-1.74149
-0.264649	-0.526663	-1.21139	-1.80371
-0.23315	-0.501027	-1.17741	-1.8724
-0.157245	-0.490645	-1.14484	-1.9227
-0.126656	-0.472002	-1.14387	-1.94531
-0.164786	-0.455066	-1.17267	-1.92605
-0.199078	-0.484911	-1.19769	-1.88562
-0.167655	-0.566827	-1.20614	-1.87544
-0.103701	-0.672541	-1.20486	-1.90056
-0.0814908	-0.728858	-1.19212	-1.93511
-0.117495	-0.704055	-1.1778	-1.98439
-0.157324	-0.626434	-1.18333	-2.0395
-0.137841	-0.556913	-1.19716	-2.05908
-0.0580234	-0.526748	-1.195	-2.04071
0.00898308	-0.524392	-1.18786	-2.02289
-0.0169234	-0.52949	-1.19416	-2.0146
-0.119839	-0.52745	-1.20568	-2.01472
-0.191016	-0.547689	-1.21949	-2.04449
-0.160557	-0.602547	-1.23898	-2.09473
-0.0750858	-0.686488	-1.24652	-2.12494
-0.0362208	-0.757706	-1.23731	-2.1341
-0.0857126	-0.775221	-1.23175	-2.14665
-0.189333	-0.740714	-1.23517	-2.16333
-0.271052	-0.693173	-1.23566	-2.1875
-0.27209	-0.666987	-1.24455	-2.23223
-0.221698	-0.646883	-1.2705	-2.27629
-0.202699	-0.628133	-1.28787	-2.29191
-0.241471	-0.606913	-1.2803	-2.30111
-0.276311	-0.610711	-1.25464	-2.33053
-0.252815	-0.668442	-1.21209	-2.35466
-0.179416	-0.751743	-1.16552	-2.35082
-0.110395	-0.801908	-1.14907	-2.32881
-0.104424	-0.776188	-1.17385	-2.29348
-0.147745	-0.712811	-1.21485	-2.2478
-0.15196	-0.655938	-1.25133	-2.2135
-0.0834469	-0.637933	-1.27039	-2.20527
-0.0326896	-0.639365	-1.25953	-2.20335
-0.0735989	-0.639884	-1.23646	-2.1991
-0.168431	-0.643682	-1.23981	-2.21412
-0.229489	-0.661093	-1.26858	-2.25586
-0.209704	-0.703895	-1.28414	-2.30269
-0.141963	-0.737409	-1.27407	-2.33594
-0.120886	-0.734826	-1.25926	-2.34276
-0.205052	-0.698844	-1.2537	-2.30887
-0.319773	-0.677937	-1.2502	-2.25447
-0.348465	-0.693566	-1.23548	-2.22731
-0.269918	-0.731186	-1.19672	-2.23639
-0.161967	-0.764468	-1.14329	-2.25352
-0.106399	-0.760438	-1.117	-2.28116
-0.134874	-0.737276	-1.14401	-2.33551
-0.197944	-0.719949	-1.19365	-2.38548
-0.202828	-0.720779	-1.22238	-2.39514
-0.133415	-0.716775	-1.2237	-2.37221
-0.0897184	-0.692354	-1.2189	-2.34003
-0.143291	-0.66128	-1.21866	-2.31384
-0.23362	-0.643487	-1.22363	-2.31354
-0.265504	-0.656391	-1.23268	-2.33504
-0.210662	-0.688145	-1.22916	-2.32864
-0.119588	-0.74314	-1.20279	-2.27613
-0.0801494	-0.805162	-1.17482	-2.21936
-0.126157	-0.863971	-1.1663	-2.18503
-0.182039	-0.906468	-1.16438	-2.17197
-0.155223	-0.921946	-1.15623	-2.19741
-0.0679909	-0.899293	-1.15739	-2.2616
-0.0221288	-0.840356	-1.17646	-2.31995
-0.0704485	-0.773181	-1.2074	-2.34755
-0.171617	-0.725407	-1.24616	-2.3558
-0.232369	-0.733795	-1.27112	-2.33431
-0.197639	-0.787273	-1.25606	-2.2773
-0.105324	-0.848353	-1.21975	-2.22396
-0.0601084	-0.881829	-1.20769	-2.19525
-0.113512	-0.880574	-1.22176	-2.17641
-0.194527	-0.856687	-1.23145	-2.17908
-0.192994	-0.823185	-1.2195	-2.21866
-0.108045	-0.797816	-1.18369	-2.2608
-0.0376398	-0.7846	-1.13436	-2.27438
-0.0465858	-0.797855	-1.10664	-2.27636
-0.116067	-0.830575	-1.1177	-2.27305
-0.171745	-0.869146	-1.13645	-2.24926
-0.16405	-0.888287	-1.14715	-2.21405
-0.123205	-0.864997	-1.1739	-2.177
-0.133695	-0.8225	-1.22741	-2.125
-0.216811	-0.798754	-1.28328	-2.07873
-0.286653	-0.820814	-1.3064	-2.07842
-0.273137	-0.85799	-1.2678	-2.10672
-0.207203	-0.888363	-1.17222	-2.11665
-0.167809	-0.890921	-1.08661	-2.10662
-0.189088	-0.884919	-1.07225	-2.10267
-0.239538	-0.898762	-1.10965	-2.10932
-0.24185	-0.915856	-1.1432	-2.13107
-0.15686	-0.910257	-1.15034	-2.17083
-0.0669577	-0.870211	-1.13714	-2.19948
-0.0891371	-0.83199	-1.11976	-2.1949
-0.199564	-0.816092	-1.12225	-2.17849
-0.259682	-0.827919	-1.14469	-2.17078
-0.199402	-0.834754	-1.15775	-2.15362
-0.0628599	-0.804108	-1.15501	-2.11268
0.0435209	-0.742002	-1.16313	-2.0628
0.0376164	-0.683249	-1.18582	-2.01572
-0.050149	-0.690375	-1.20117	-1.98257
-0.103962	-0.764483	-1.20607	-1.99204
-0.077709	-0.860813	-1.21055	-2.04975
-0.0416821	-0.920891	-1.21316	-2.11409
-0.065914	-0.932812	-1.21686	-2.15827
-0.144309	-0.921807	-1.22866	-2.18912
-0.21611	-0.914413	-1.23486	-2.20405
-0.21172	-0.922559	-1.20866	-2.19214
-0.130535	-0.913277	-1.15263	-2.17307
-0.0725248	-0.892939	-1.09814	-2.1657
-0.119	-0.886064	-1.06889	-2.1497
-0.218399	-0.922888	-1.0737	-2.11729
-0.265606	-0.988109	-1.10651	-2.08595
-0.233766	-1.04193	-1.14197	-2.05432
-0.17616	-1.05746	-1.15408	-2.01594
-0.157916	-1.04056	-1.1487	-1.99769
-0.210118	-1.02243	-1.15192	-2.01465
-0.275306	-1.00693	-1.15936	-2.03055
-0.245349	-0.991532	-1.15335	-2.01638
-0.115893	-0.961343	-1.14944	-1.97826
0.00129624	-0.930157	-1.16531	-1.91904
0.011369	-0.923177	-1.18692	-1.85733
-0.0648393	-0.943914	-1.19849	-1.84221
-0.140702	-0.973067	-1.2029	-1.88329
-0.149483	-0.985185	-1.19429	-1.93437
-0.103964	-0.981443	-1.1753	-1.97003
-0.0838482	-0.973122	-1.17117	-1.99314
-0.139688	-0.989637	-1.18483	-1.99257
-0.225664	-1.01761	-1.19288	-1.96676
-0.244581	-1.021	-1.19554	-1.94122
-0.175376	-0.985697	-1.20922	-1.91309
-0.0988556	-0.938298	-1.22789	-1.86376
-0.0963599	-0.933034	-1.2462	-1.81965
-0.161344	-0.983741	-1.26927	-1.81277
-0.223605	-1.06078	-1.28449	-1.82241
-0.220405	-1.09752	-1.27709	-1.82136
-0.156753	-1.0856	-1.26351	-1.8095
-0.120635	-1.05383	-1.26345	-1.78069
-0.17288	-1.0471	-1.26607	-1.73262
-0.258966	-1.06545	-1.26337	-1.69346
-0.279596	-1.07067	-1.2566	-1.67443
-0.231703	-1.05131	-1.23996	-1.64242
-0.199811	-1.02173	-1.22555	-1.59134
-0.235419	-1.0142	-1.24011	-1.54863
-0.310778	-1.02443	-1.2756	-1.51533
-0.348828	-1.04199	-1.29214	-1.48869
-0.292423	-1.0424	-1.28264	-1.49771
-0.180241	-1.03428	-1.26819	-1.56113
-0.130718	-1.05588	-1.25608	-1.65128
-0.189404	-1.10912	-1.24839	-1.73635
-0.267494	-1.16892	-1.24686	-1.80069
-0.265764	-1.18532	-1.23785	-1.82226
-0.180055	-1.15243	-1.22038	-1.80328
-0.0793684	-1.09778	-1.22337	-1.78361
-0.0431301	-1.07329	-1.25724	-1.7812
-0.0829228	-1.09556	-1.29121	-1.76726
-0.108246	-1.12803	-1.30336	-1.73302
-0.0534276	-1.13477	-1.30253	-1.70878
0.0124349	-1.10441	-1.30031	-1.7063
-0.00709349	-1.09285	-1.29971	-1.7123
-0.118127	-1.12251	-1.30532	-1.72969
-0.240913	-1.17262	-1.31164	-1.75785
-0.283958	-1.18886	-1.30396	-1.77166
-0.219226	-1.15105	-1.28603	-1.76942
-0.132734	-1.09043	-1.2779	-1.76794
-0.143763	-1.05897	-1.28253	-1.75568
-0.244314	-1.08784	-1.28061	-1.7154
-0.303757	-1.13321	-1.26284	-1.66677
-0.24473	-1.15204	-1.23719	-1.63215
-0.131853	-1.13212	-1.2098	-1.60595
-0.0781368	-1.10832	-1.19322	-1.60386
-0.144015	-1.11418	-1.20788	-1.65294
-0.274023	-1.13925	-1.24652	-1.72391
-0.343212	-1.14484	-1.2749	-1.76971
-0.289746	-1.10666	-1.27988	-1.79219
-0.204382	-1.06344	-1.28219	-1.81053
-0.193661	-1.06408	-1.28157	-1.82271
-0.239542	-1.12998	-1.25673	-1.8355
-0.262787	-1.20183	-1.21007	-1.84905
-0.21843	-1.21405	-1.16116	-1.82769
-0.131405	-1.17153	-1.12867	-1.76226
-0.079637	-1.13733	-1.13666	-1.70106
-0.116967	-1.166	-1.18854	-1.665
-0.190651	-1.22788	-1.23811	-1.63736
-0.18802	-1.2557	-1.2473	-1.62757
-0.0833069	-1.2011	-1.23416	-1.64636
0.0165888	-1.11973	-1.22393	-1.66256
-0.00451639	-1.08873	-1.21665	-1.65099
-0.122776	-1.13298	-1.21328	-1.6226
-0.206027	-1.19583	-1.2105	-1.58039
-0.172428	-1.20053	-1.19167	-1.52918
-0.0842256	-1.13818	-1.17531	-1.50568
-0.0627	-1.0617	-1.19958	-1.52246
-0.146013	-1.03935	-1.25633	-1.54159
-0.24496	-1.06577	-1.30562	-1.5475
-0.239438	-1.09034	-1.32994	-1.55266
-0.132384	-1.06863	-1.32762	-1.54632
-0.0384788	-1.03092	-1.29814	-1.52474
-0.0450952	-1.03794	-1.26456	-1.52129
-0.127083	-1.09442	-1.2444	-1.5468
-0.190596	-1.16218	-1.22072	-1.56842
-0.172642	-1.17576	-1.19066	-1.57758
-0.10613	-1.12918	-1.18311	-1.58606
-0.0903097	-1.07295	-1.20721	-1.57783
-0.173387	-1.07439	-1.24513	-1.54949
-0.279899	-1.12373	-1.28161	-1.52369
-0.304804	-1.15679	-1.29865	-1.5053
-0.247945	-1.14583	-1.2818	-1.47967
-0.194774	-1.09553	-1.25869	-1.45789
-0.206557	-1.063	-1.26819	-1.46041
-0.27135	-1.07552	-1.30048	-1.4726
-0.305457	-1.11786	-1.32115	-1.47042
-0.244	-1.12738	-1.32711	-1.45472
-0.139685	-1.08494	-1.33337	-1.43568
-0.117926	-1.03606	-1.3457	-1.41894
-0.2014	-1.03302	-1.36152	-1.42286
-0.294492	-1.08451	-1.36913	-1.45289
-0.307756	-1.12799	-1.34984	-1.46806
-0.232023	-1.1314	-1.30796	-1.4373
-0.147315	-1.10483	-1.27797	-1.39082
-0.148788	-1.09257	-1.27537	-1.36732
-0.225477	-1.11005	-1.27741	-1.36332
-0.256635	-1.12227	-1.26747	-1.37368
-0.181626	-1.09425	-1.25583	-1.39792
-0.0780693	-1.03598	-1.25153	-1.41176
-0.0580874	-1.01167	-1.25457	-1.40705
-0.132561	-1.03893	-1.26415	-1.41091
-0.227994	-1.09623	-1.27514	-1.43157
-0.258511	-1.13783	-1.2681	-1.43705
-0.194319	-1.14148	-1.24533	-1.41939
-0.10983	-1.12698	-1.23975	-1.39928
-0.0970813	-1.1288	-1.26132	-1.37462
-0.138997	-1.16053	-1.27933	-1.34193
-0.148586	-1.18202	-1.27217	-1.32857
-0.10774	-1.16744	-1.2518	-1.34518
-0.0752449	-1.11857	-1.23431	-1.37645
-0.0996272	-1.08347	-1.23215	-1.42655
-0.185292	-1.0836	-1.25118	-1.49093
-0.264765	-1.10381	-1.26282	-1.523
-0.243917	-1.10603	-1.23866	-1.50702
-0.126485	-1.06988	-1.20611	-1.4928
-0.0289828	-1.02264	-1.21255	-1.50991
-0.0412275	-1.00128	-1.25558	-1.54783
-0.134042	-1.0201	-1.29989	-1.60273
-0.215165	-1.0418	-1.31629	-1.65458
-0.232697	-1.04153	-1.29191	-1.66518
-0.214869	-1.01698	-1.25003	-1.64336
-0.209227	-0.993491	-1.24111	-1.62524
-0.227146	-1.00443	-1.27625	-1.60228
-0.216888	-1.04827	-1.30865	-1.55427
-0.12702	-1.10198	-1.31255	-1.50831
-0.000822848	-1.13189	-1.30375	-1.48876
0.0417054	-1.1465	-1.2986	-1.48506
-0.0655768	-1.15623	-1.30848	-1.5014
-0.24292	-1.16624	-1.33608	-1.54503
-0.355255	-1.15668	-1.35255	-1.5789
-0.340635	-1.1129	-1.32935	-1.57568
-0.257508	-1.05904	-1.29034	-1.55307
-0.225483	-1.02836	-1.27673	-1.52455
-0.289316	-1.06014	-1.28841	-1.4856
-0.367987	-1.12201	-1.30884	-1.4518
-0.351302	-1.15562	-1.32679	-1.43453
-0.246206	-1.11621	-1.32929	-1.40897
-0.167428	-1.03589	-1.32234	-1.37505
-0.192381	-0.975267	-1.33111	-1.37299
-0.271112	-0.967455	-1.34655	-1.41518
-0.300372	-1.00864	-1.33299	-1.47237
-0.226035	-1.04809	-1.29716	-1.52253
-0.104571	-1.06775	-1.28052	-1.5551
-0.0604606	-1.07853	-1.29153	-1.55056
-0.125902	-1.10684	-1.30358	-1.50992
-0.205446	-1.13675	-1.29085	-1.46476
-0.219626	-1.13542	-1.2422	-1.42892
-0.198404	-1.10316	-1.18188	-1.39604
-0.203743	-1.06575	-1.16409	-1.3886
-0.256816	-1.06284	-1.20829	-1.42403
-0.321345	-1.08166	-1.26503	-1.46199
-0.322257	-1.09884	-1.28075	-1.46229
-0.244263	-1.08735	-1.26361	-1.44006
-0.178975	-1.0574	-1.25724	-1.42646
-0.203679	-1.03953	-1.27571	-1.42451
-0.283787	-1.03655	-1.30278	-1.43965
-0.335507	-1.03534	-1.31586	-1.47081
-0.318454	-1.02351	-1.3018	-1.48687
-0.248256	-1.03138	-1.27636	-1.47262
-0.175826	-1.07146	-1.27676	-1.44506
-0.152215	-1.14596	-1.3113	-1.40756
-0.16588	-1.22276	-1.33579	-1.35479
-0.144842	-1.26248	-1.31253	-1.31862
-0.0850229	-1.24814	-1.25865	-1.33456
-0.0605229	-1.19833	-1.20889	-1.38268
-0.107661	-1.1529	-1.18233	-1.4299
-0.184768	-1.12565	-1.1833	-1.46978
-0.229883	-1.11363	-1.19468	-1.48154
-0.208455	-1.09816	-1.18407	-1.44529
-0.145201	-1.09063	-1.1548	-1.39437
-0.132769	-1.11094	-1.15323	-1.36999
-0.212593	-1.16109	-1.19338	-1.36361
-0.301837	-1.21594	-1.239	-1.35995
-0.298936	-1.23079	-1.26078	-1.36311
-0.212444	-1.20029	-1.25509	-1.35806
-0.132248	-1.14793	-1.23436	-1.33566
-0.128478	-1.11909	-1.23294	-1.3297
-0.189525	-1.12255	-1.26843	-1.34733
-0.239201	-1.14495	-1.30535	-1.35175
-0.223337	-1.15408	-1.31178	-1.34204
-0.165879	-1.14065	-1.30642	-1.35003
-0.152018	-1.1375	-1.3128	-1.37058
-0.217239	-1.15747	-1.32097	-1.3835
-0.288171	-1.19019	-1.31745	-1.39021
-0.283554	-1.19363	-1.2996	-1.38015
-0.209127	-1.16361	-1.26708	-1.33273
-0.146169	-1.11516	-1.24733	-1.27342
-0.162584	-1.09078	-1.26986	-1.24256
-0.257867	-1.10271	-1.31648	-1.23498
-0.350634	-1.12523	-1.34447	-1.24401
-0.355716	-1.13372	-1.34638	-1.2817
-0.288987	-1.11212	-1.34151	-1.33069
-0.239346	-1.09034	-1.34285	-1.36201
-0.250477	-1.08656	-1.36203	-1.38666
-0.281278	-1.10225	-1.3884	-1.42165
-0.278168	-1.11771	-1.3776	-1.44257
-0.238392	-1.12466	-1.31242	-1.43564
-0.211402	-1.12605	-1.23203	-1.41836
-0.249461	-1.12295	-1.17401	-1.393
-0.352203	-1.14093	-1.14265	-1.35179
-0.442189	-1.17349	-1.13417	-1.3132
-0.452367	-1.20912	-1.14316	-1.29843
-0.419233	-1.21896	-1.15661	-1.2932
-0.410156	-1.18811	-1.17432	-1.28301
-0.438896	-1.11583	-1.20527	-1.27314
-0.4714	-1.03011	-1.23038	-1.25426
-0.450957	-0.977751	-1.21697	-1.20702
-0.356728	-0.960938	-1.17345	-1.15701
-0.264151	-0.97547	-1.1422	-1.13569
-0.27171	-1.00363	-1.1489	-1.11931
-0.351407	-1.05109	-1.18276	-1.08409
-0.394481	-1.10197	-1.21582	-1.04315
-0.357719	-1.13522	-1.22361	-1.00087
-0.293444	-1.14478	-1.20539	-0.947096
-0.267918	-1.13325	-1.19391	-0.902414
-0.308194	-1.11392	-1.21673	-0.887678
-0.367724	-1.08693	-1.24588	-0.883412
-0.366917	-1.06018	-1.23615	-0.879774
-0.295549	-1.03443	-1.19437	-0.89103
-0.231906	-1.02914	-1.1685	-0.911364
-0.236891	-1.05389	-1.18334	-0.932213
-0.272841	-1.08951	-1.22607	-0.978964
-0.284585	-1.11799	-1.2694	-1.06106
-0.261561	-1.13242	-1.2762	-1.13289
-0.228807	-1.15097	-1.23768	-1.16096
-0.235822	-1.18089	-1.1981	-1.15072
-0.308539	-1.22973	-1.19629	-1.09486
-0.391199	-1.27524	-1.21898	-0.991914
-0.405152	-1.29925	-1.2439	-0.893301
-0.36651	-1.29394	-1.27339	-0.841468
-0.354479	-1.26629	-1.30162	-0.833578
-0.391922	-1.23544	-1.31751	-0.870978
-0.420844	-1.20308	-1.32444	-0.952765
-0.383058	-1.17868	-1.30972	-1.03552
-0.291179	-1.16067	-1.25219	-1.08725
-0.212984	-1.15716	-1.18127	-1.11625
-0.213294	-1.1593	-1.15427	-1.1086
-0.286427	-1.16691	-1.1779	-1.04348
-0.35787	-1.1709	-1.22448	-0.964231
-0.353053	-1.16617	-1.26854	-0.939706
-0.293056	-1.16703	-1.29254	-0.984382
-0.254168	-1.17517	-1.30454	-1.07506
-0.253567	-1.19006	-1.33824	-1.1771
-0.257908	-1.1944	-1.38781	-1.23696
-0.236851	-1.18559	-1.39776	-1.22381
-0.193918	-1.16469	-1.35001	-1.1722
-0.174822	-1.15062	-1.284	-1.12813
-0.233807	-1.15296	-1.23739	-1.09172
-0.347663	-1.14769	-1.22711	-1.06374
-0.424867	-1.12547	-1.25237	-1.06275
-0.420111	-1.08538	-1.28689	-1.07572
-0.374665	-1.06601	-1.30326	-1.07962
-0.348104	-1.08245	-1.31289	-1.08087
-0.354585	-1.12376	-1.33336	-1.08457
-0.370557	-1.16284	-1.34759	-1.06628
-0.35658	-1.18373	-1.33738	-1.02257
-0.307273	-1.18689	-1.31083	-0.980223
-0.276415	-1.16898	-1.27935	-0.947392
-0.311649	-1.15473	-1.25582	-0.921293
-0.3821	-1.1383	-1.26131	-0.92423
-0.418079	-1.12081	-1.2889	-0.96652
-0.407565	-1.10358	-1.30264	-1.01287
-0.374018	-1.10122	-1.29358	-1.03431
-0.353432	-1.1162	-1.29254	-1.04038
-0.376515	-1.13328	-1.3146	-1.03946
-0.410726	-1.13732	-1.33764	-1.02822
-0.382658	-1.1061	-1.33736	-1.02355
-0.304287	-1.06241	-1.31134	-1.03124
-0.262438	-1.03797	-1.27435	-1.02085
-0.297285	-1.06009	-1.25529	-0.99414
-0.374013	-1.11494	-1.27704	-0.992125
-0.430275	-1.1644	-1.32307	-1.02085
-0.418029	-1.19253	-1.34631	-1.04944
-0.347258	-1.18928	-1.32802	-1.06724
-0.29619	-1.16127	-1.29816	-1.07572
-0.308178	-1.10988	-1.28249	-1.06473
-0.341543	-1.05442	-1.28162	-1.0527
-0.349616	-1.00622	-1.2876	-1.06878
-0.348602	-0.993682	-1.28992	-1.09381
-0.376767	-1.03255	-1.28256	-1.09564
-0.425993	-1.0973	-1.28121	-1.09207
-0.456357	-1.15243	-1.30702	-1.10493
-0.430567	-1.16867	-1.34019	-1.11761
-0.340062	-1.15298	-1.34825	-1.122
-0.257194	-1.12023	-1.34141	-1.1261
-0.27172	-1.10406	-1.34414	-1.11066
-0.37352	-1.11498	-1.35635	-1.06975
-0.460756	-1.1539	-1.37257	-1.04725
-0.472927	-1.20176	-1.38915	-1.05534
-0.433187	-1.23118	-1.38342	-1.05724
-0.401794	-1.23631	-1.35167	-1.04973
-0.411925	-1.21984	-1.33135	-1.0519
-0.44125	-1.20106	-1.34453	-1.05388
-0.438083	-1.18325	-1.36862	-1.05111
-0.384424	-1.16575	-1.38393	-1.05551
-0.337292	-1.14203	-1.38823	-1.04526
-0.358581	-1.12605	-1.38226	-1.00074
-0.434741	-1.12633	-1.39215	-0.965425
-0.480766	-1.126	-1.43877	-0.980642
-0.448867	-1.12734	-1.48579	-1.02695
-0.378388	-1.12714	-1.4857	-1.07932
-0.331114	-1.13927	-1.44633	-1.12704
-0.33587	-1.16021	-1.40351	-1.13954
-0.353203	-1.18727	-1.37597	-1.10562
-0.312523	-1.19747	-1.37652	-1.06357
-0.218358	-1.17565	-1.39902	-1.04168
-0.170731	-1.1354	-1.41044	-1.01846
-0.229856	-1.0874	-1.40537	-0.987711
-0.330902	-1.05225	-1.40925	-0.973356
-0.37419	-1.02241	-1.42387	-0.976418
-0.32686	-1.01232	-1.42557	-0.988245
-0.244714	-1.02334	-1.40997	-1.01242
-0.214141	-1.05147	-1.38585	-1.03044
-0.270351	-1.09133	-1.35933	-1.00836
-0.35002	-1.1334	-1.34929	-0.961382
-0.371267	-1.17162	-1.371	-0.935449
-0.333648	-1.19986	-1.39915	-0.932924
-0.305609	-1.23514	-1.39987	-0.931194
-0.333724	-1.25393	-1.37931	-0.932418
-0.39539	-1.23472	-1.36173	-0.943868
-0.426422	-1.1756	-1.353	-0.954903
-0.371374	-1.09932	-1.35037	-0.96703
-0.267657	-1.04971	-1.35013	-0.983487
-0.238986	-1.04872	-1.34287	-0.977916
-0.330207	-1.09297	-1.32861	-0.930825
-0.442504	-1.13021	-1.32683	-0.875808
-0.473886	-1.13483	-1.34266	-0.852557
-0.424586	-1.10677	-1.34524	-0.845932
-0.371304	-1.08229	-1.31661	-0.835539
-0.397283	-1.08913	-1.28458	-0.826144
-0.500816	-1.11591	-1.28247	-0.819536
-0.569768	-1.14363	-1.30621	-0.826675
-0.518864	-1.14375	-1.32968	-0.867652
-0.417335	-1.11427	-1.33137	-0.912139
-0.399622	-1.06985	-1.2971	-0.894316
-0.483516	-1.04453	-1.24431	-0.812962
-0.570387	-1.04346	-1.2205	-0.732464
-0.559348	-1.06538	-1.24016	-0.684827
-0.448248	-1.10333	-1.27113	-0.66321
-0.332649	-1.14032	-1.28858	-0.666165
-0.321661	-1.17096	-1.29658	-0.675857
-0.41075	-1.17617	-1.2974	-0.665856
-0.480237	-1.143	-1.29766	-0.65309
-0.461621	-1.07018	-1.31246	-0.663186
-0.420364	-0.995082	-1.33294	-0.671381
-0.445534	-0.955405	-1.33677	-0.652043
-0.534017	-0.971561	-1.33482	-0.624579
-0.604905	-1.02977	-1.34722	-0.592535
-0.570324	-1.08933	-1.35678	-0.538185
-0.428582	-1.14121	-1.34566	-0.479902
-0.280459	-1.17951	-1.33001	-0.435301
-0.233319	-1.21392	-1.32707	-0.390607
-0.282875	-1.23657	-1.34074	-0.35781
-0.317932	-1.23835	-1.3721	-0.365544
-0.272581	-1.21116	-1.4017	-0.385249
-0.204622	-1.18002	-1.39328	-0.373086
-0.21104	-1.17757	-1.35721	-0.339405
-0.306224	-1.20309	-1.33829	-0.309678
-0.408426	-1.24917	-1.34946	-0.282267
-0.423613	-1.27708	-1.37526	-0.270263
-0.33695	-1.28178	-1.39384	-0.284872
-0.249692	-1.28078	-1.37788	-0.296127
-0.258524	-1.29452	-1.32284	-0.288505
-0.337579	-1.30323	-1.27504	-0.288618
-0.387627	-1.28122	-1.27286	-0.303777
-0.362453	-1.24131	-1.29742	-0.299053
-0.299163	-1.20608	-1.31557	-0.267042
-0.272084	-1.20407	-1.31717	-0.236478
-0.318152	-1.21803	-1.30064	-0.214528
-0.386812	-1.23444	-1.27741	-0.200325
-0.398581	-1.2448	-1.26903	-0.202668
-0.35346	-1.24687	-1.26965	-0.201838
-0.334889	-1.24565	-1.24722	-0.167663
-0.388576	-1.23086	-1.2005	-0.128287
-0.463712	-1.20111	-1.16043	-0.137348
-0.48865	-1.15919	-1.1371	-0.191714
-0.443011	-1.13874	-1.11528	-0.248635
-0.383982	-1.13308	-1.08999	-0.279798
-0.395987	-1.12928	-1.06332	-0.27575
-0.487396	-1.11917	-1.03506	-0.248893
-0.547124	-1.09535	-1.02019	-0.253589
-0.486418	-1.07587	-1.03356	-0.324812
-0.369119	-1.07312	-1.05833	-0.418265
-0.319793	-1.09313	-1.06337	-0.467494
-0.384074	-1.10612	-1.04889	-0.458606
-0.502527	-1.09628	-1.04246	-0.410816
-0.55266	-1.05812	-1.05436	-0.338245
-0.451862	-1.0192	-1.07405	-0.273635
-0.28684	-1.01332	-1.08945	-0.249091
-0.215794	-1.04028	-1.08546	-0.248278
-0.276905	-1.08	-1.06255	-0.252135
-0.360613	-1.09142	-1.04911	-0.273558
-0.366701	-1.06398	-1.0646	-0.309462
-0.299885	-1.01489	-1.07611	-0.329834
-0.236189	-0.97503	-1.05251	-0.330691
-0.24916	-0.950822	-1.01662	-0.323505
-0.321665	-0.947904	-1.00146	-0.297185
-0.352579	-0.967139	-1.01482	-0.249932
-0.294378	-0.986169	-1.05365	-0.208585
-0.244763	-1.00296	-1.09931	-0.177153
-0.316924	-1.00792	-1.1137	-0.145702
-0.469567	-1.00316	-1.08595	-0.140376
-0.563514	-0.990634	-1.04543	-0.17686
-0.523616	-0.981748	-1.0039	-0.218637
-0.388884	-0.975433	-0.94855	-0.237381
-0.269282	-0.978249	-0.889562	-0.251915
-0.263061	-0.994565	-0.850282	-0.270426
-0.347715	-1.00104	-0.838145	-0.282709
-0.410491	-0.992627	-0.865386	-0.293625
-0.397366	-0.968334	-0.930788	-0.291273
-0.373717	-0.95106	-0.986147	-0.245496
-0.438133	-0.950635	-0.989219	-0.181779
-0.581505	-0.961952	-0.951623	-0.157335
-0.688107	-0.965605	-0.903032	-0.175431
-0.64908	-0.964301	-0.858921	-0.205239
-0.483621	-0.982493	-0.839873	-0.234183
-0.335537	-1.02599	-0.849259	-0.249772
-0.327559	-1.08942	-0.861678	-0.242371
-0.424951	-1.1206	-0.873247	-0.245951
-0.476622	-1.09346	-0.903455	-0.293041
-0.413049	-1.03136	-0.939299	-0.347798
-0.317049	-0.98121	-0.943974	-0.368829
-0.298305	-0.956384	-0.907039	-0.362166
-0.369564	-0.922833	-0.846888	-0.344492
-0.43707	-0.866615	-0.794032	-0.325115
-0.393616	-0.804377	-0.785845	-0.323402
-0.257265	-0.798945	-0.821537	-0.341754
-0.176492	-0.860221	-0.846038	-0.338241
-0.246014	-0.950079	-0.823828	-0.297734
-0.389987	-1.00682	-0.786656	-0.264356
-0.451141	-1.00614	-0.776982	-0.268123
-0.37149	-0.990105	-0.798644	-0.29521
-0.243756	-0.992499	-0.83636	-0.336157
-0.211279	-1.01232	-0.870815	-0.383962
-0.318161	-1.01338	-0.881981	-0.413823
-0.438001	-0.998984	-0.87047	-0.419801
-0.421246	-0.976644	-0.865269	-0.424639
-0.289959	-0.966843	-0.882678	-0.434355
-0.209883	-0.981846	-0.904446	-0.435598
-0.270231	-0.99974	-0.910224	-0.439223
-0.401756	-1.00733	-0.897182	-0.457324
-0.468952	-0.995954	-0.867104	-0.467063
-0.401512	-0.978942	-0.826096	-0.458819
-0.278376	-0.958192	-0.79057	-0.45826
-0.270614	-0.936338	-0.775157	-0.479504
-0.421826	-0.904148	-0.774762	-0.507554
-0.571151	-0.866587	-0.790769	-0.541604
-0.568746	-0.850444	-0.836114	-0.581019
-0.440294	-0.871179	-0.891769	-0.595126
-0.32469	-0.942149	-0.915266	-0.576808
-0.332712	-1.02503	-0.903711	-0.561523
-0.443632	-1.0722	-0.894604	-0.560015
-0.516494	-1.05959	-0.905604	-0.556745
-0.444287	-1.01171	-0.925646	-0.561593
-0.302216	-0.963085	-0.941508	-0.577154
-0.253198	-0.939645	-0.930283	-0.573624
-0.339574	-0.939896	-0.885889	-0.547794
-0.451863	-0.935501	-0.851393	-0.534456
-0.474103	-0.936843	-0.863179	-0.536697
-0.406171	-0.95463	-0.895479	-0.539439
-0.346697	-0.984754	-0.91011	-0.558284
-0.389718	-0.994186	-0.902563	-0.600863
-0.498577	-0.966875	-0.880859	-0.643692
-0.53436	-0.918137	-0.865267	-0.681171
-0.423491	-0.890894	-0.885218	-0.716064
-0.269544	-0.91786	-0.929395	-0.721939
-0.22856	-0.97755	-0.944571	-0.684929
-0.33101	-1.03481	-0.921828	-0.63759
-0.463493	-1.04968	-0.902432	-0.600413
-0.492252	-1.03865	-0.913265	-0.566863
-0.405496	-1.03986	-0.957465	-0.557332
-0.309395	-1.07095	-1.01961	-0.5929
-0.312132	-1.11264	-1.0598	-0.649389
-0.40125	-1.13195	-1.05305	-0.7087
-0.452035	-1.12332	-1.0293	-0.780067
-0.388537	-1.09962	-1.02272	-0.84444
-0.282341	-1.1026	-1.0166	-0.858598
-0.24924	-1.11497	-0.98888	-0.811451
-0.304339	-1.11011	-0.944961	-0.723744
-0.361947	-1.08432	-0.902783	-0.613248
-0.334543	-1.0587	-0.887734	-0.518724
-0.232467	-1.05877	-0.916937	-0.478831
-0.169555	-1.07718	-0.964439	-0.481617
-0.238297	-1.09155	-0.988033	-0.488741
-0.376952	-1.06592	-0.991606	-0.488408
-0.443558	-1.02507	-1.00356	-0.480857
-0.402598	-1.01012	-1.01824	-0.45583
-0.343803	-1.04881	-1.01262	-0.423947
-0.367186	-1.11151	-0.985089	-0.410006
-0.46888	-1.13258	-0.943248	-0.407455
-0.535442	-1.09625	-0.902893	-0.398351
-0.461687	-1.03082	-0.895107	-0.40452
-0.303146	-0.992804	-0.926812	-0.454196
-0.246709	-0.993658	-0.959841	-0.527883
-0.378893	-1.01252	-0.962295	-0.596953
-0.579061	-1.0058	-0.947438	-0.654106
-0.671826	-0.976802	-0.942125	-0.690828
-0.596734	-0.978419	-0.952016	-0.698209
-0.446412	-1.02967	-0.96858	-0.699518
-0.380427	-1.10949	-0.973633	-0.711911
-0.451789	-1.15269	-0.950654	-0.706547
-0.526004	-1.13711	-0.908429	-0.67629
-0.465627	-1.09261	-0.87721	-0.659707
-0.325586	-1.07385	-0.870637	-0.669683
-0.266897	-1.09666	-0.868616	-0.677716
-0.351755	-1.1318	-0.855463	-0.677848
-0.502602	-1.14064	-0.849808	-0.687297
-0.573644	-1.10914	-0.866144	-0.70842
-0.483014	-1.08646	-0.897651	-0.751038
-0.32792	-1.10486	-0.93447	-0.828677
-0.281854	-1.15914	-0.963382	-0.902639
-0.380252	-1.20375	-0.964059	-0.922971
-0.476234	-1.1982	-0.941543	-0.902646
-0.444728	-1.14613	-0.929123	-0.877761
-0.318568	-1.10251	-0.932558	-0.858229
-0.234976	-1.11255	-0.933441	-0.857281
-0.283411	-1.14757	-0.929442	-0.881974
-0.407677	-1.16934	-0.923679	-0.896257
-0.446198	-1.1499	-0.909477	-0.876116
-0.323972	-1.10947	-0.900014	-0.856071
-0.169619	-1.07935	-0.913589	-0.851082
-0.160958	-1.06875	-0.934724	-0.835841
-0.309953	-1.06112	-0.950079	-0.819765
-0.451996	-1.04258	-0.974713	-0.836377
-0.447861	-1.02775	-1.00125	-0.880899
-0.33102	-1.02791	-0.998208	-0.937445
-0.250713	-1.06109	-0.972029	-1.00037
-0.300202	-1.10962	-0.950073	-1.03628
-0.398552	-1.16078	-0.924378	-1.01439
-0.395603	-1.19294	-0.893837	-0.965809
-0.259412	-1.18794	-0.880834	-0.931093
-0.133358	-1.15645	-0.8837	-0.896972
-0.177406	-1.12073	-0.882322	-0.853448
-0.370145	-1.0985	-0.878549	-0.81275
-0.537208	-1.07683	-0.878601	-0.765374
-0.543754	-1.06544	-0.875143	-0.703911
-0.426503	-1.05821	-0.875324	-0.657399
-0.340455	-1.06497	-0.882752	-0.645533
-0.394519	-1.09502	-0.872693	-0.651045
-0.515456	-1.1309	-0.838453	-0.673727
-0.531919	-1.16018	-0.813202	-0.724638
-0.397649	-1.18081	-0.813847	-0.769867
-0.254861	-1.21261	-0.825713	-0.768587
-0.251333	-1.239	-0.84007	-0.732185
-0.37664	-1.24048	-0.85785	-0.69716
-0.488737	-1.20057	-0.874967	-0.676673
-0.45676	-1.13626	-0.899567	-0.677536
-0.311986	-1.08301	-0.939547	-0.705128
-0.22947	-1.05509	-0.967626	-0.737868
-0.315708	-1.0642	-0.950717	-0.75221
-0.481502	-1.08633	-0.906147	-0.760766
-0.564177	-1.11148	-0.877683	-0.772816
-0.519351	-1.13977	-0.880541	-0.763386
-0.432471	-1.17861	-0.897565	-0.726867
-0.417358	-1.2092	-0.904727	-0.689291
-0.504947	-1.20937	-0.8852	-0.665058
-0.591079	-1.17865	-0.843554	-0.658013
-0.542258	-1.12058	-0.811459	-0.688639
-0.388192	-1.07949	-0.813892	-0.755991
-0.293003	-1.08549	-0.831732	-0.815074
-0.338853	-1.1382	-0.836613	-0.845194
-0.455068	-1.1901	-0.834346	-0.870088
-0.517826	-1.19395	-0.841903	-0.897427
-0.477262	-1.14083	-0.85105	-0.915346
-0.404434	-1.07006	-0.850605	-0.92869
-0.433691	-1.02868	-0.847317	-0.938694
-0.574435	-1.00484	-0.840929	-0.927326
-0.662744	-0.970809	-0.836419	-0.908693
-0.579952	-0.904463	-0.857247	-0.917583
-0.405122	-0.84378	-0.900292	-0.942509
-0.309543	-0.843751	-0.92265	-0.949832
-0.371307	-0.918609	-0.901971	-0.945164
-0.516892	-1.02491	-0.85862	-0.931511
-0.595387	-1.10085	-0.814356	-0.89192
-0.528223	-1.12384	-0.784829	-0.84226
-0.40436	-1.1047	-0.785874	-0.811838
-0.378002	-1.09052	-0.804005	-0.789878
-0.472646	-1.08178	-0.808275	-0.765343
-0.55202	-1.05223	-0.802923	-0.758739
-0.507324	-0.986982	-0.816919	-0.767878
-0.382616	-0.916324	-0.84731	-0.775726
-0.310678	-0.895352	-0.873649	-0.797691
-0.356333	-0.940032	-0.88294	-0.840579
-0.44951	-1.01446	-0.863745	-0.86996
-0.463832	-1.05406	-0.820133	-0.876991
-0.363222	-1.05551	-0.786569	-0.882024
-0.267029	-1.04759	-0.782858	-0.874803
-0.300873	-1.07168	-0.784012	-0.838567
-0.441277	-1.12319	-0.777553	-0.80232
-0.541847	-1.15132	-0.778383	-0.796338
-0.509449	-1.13176	-0.789876	-0.803503
-0.403254	-1.07804	-0.810617	-0.807065
-0.357476	-1.04371	-0.841763	-0.806466
-0.435796	-1.05407	-0.861522	-0.780451
-0.553867	-1.1072	-0.849318	-0.724067
-0.555896	-1.14649	-0.831651	-0.672083
-0.40427	-1.13678	-0.840418	-0.647005
-0.251175	-1.1053	-0.858247	-0.632509
-0.257999	-1.09043	-0.859669	-0.626732
-0.405635	-1.11076	-0.841901	-0.638452
-0.538681	-1.13052	-0.808709	-0.641856
-0.535564	-1.12996	-0.772936	-0.612877
-0.43071	-1.11374	-0.758542	-0.569024
-0.375832	-1.12138	-0.761032	-0.527962
-0.466823	-1.1637	-0.750628	-0.476863
-0.606978	-1.212	-0.727928	-0.418393
-0.634679	-1.22532	-0.728375	-0.375951
-0.539682	-1.18288	-0.765651	-0.355379
-0.451881	-1.1338	-0.812827	-0.357463
-0.471394	-1.10903	-0.837412	-0.404888
-0.571494	-1.11199	-0.827154	-0.492014
-0.632712	-1.11082	-0.792423	-0.55801
-0.55923	-1.07674	-0.763171	-0.566335
-0.413359	-1.00507	-0.759779	-0.52887
-0.362958	-0.929614	-0.767238	-0.457279
-0.466256	-0.901216	-0.757737	-0.371312
-0.592953	-0.914229	-0.735931	-0.316224
-0.610466	-0.948757	-0.7325	-0.316332
-0.525312	-0.979227	-0.755935	-0.347482
-0.439493	-1.01055	-0.792601	-0.395284
-0.453526	-1.05884	-0.832178	-0.456359
-0.556248	-1.12335	-0.861262	-0.499165
-0.608836	-1.16988	-0.861322	-0.506448
-0.514179	-1.15783	-0.838031	-0.507286
-0.358149	-1.09618	-0.81541	-0.512187
-0.290163	-1.02234	-0.788779	-0.501314
-0.3321	-0.986567	-0.744001	-0.48965
-0.395382	-0.986257	-0.703101	-0.512552
-0.388811	-0.998704	-0.688908	-0.556614
-0.30252	-1.00712	-0.689929	-0.587251
-0.227844	-1.01212	-0.688055	-0.60023
-0.265765	-1.02486	-0.671182	-0.590778
-0.389572	-1.04054	-0.625613	-0.561373
-0.469208	-1.05532	-0.575072	-0.552926
-0.434319	-1.06208	-0.566629	-0.589582
-0.349016	-1.07994	-0.591458	-0.640083
-0.319817	-1.10431	-0.589421	-0.682799
-0.363726	-1.12445	-0.538742	-0.724256
-0.41594	-1.13055	-0.470765	-0.747055
-0.41315	-1.11407	-0.416747	-0.731586
-0.377082	-1.08096	-0.398222	-0.700901
[truncated: 3,501 more rows]

## Sheet: panel_D_right
-2.3264
-8.2256
-10.007
-10.1833
