# Supplementary material for: Stimulation of VTA dopamine inputs to LH upregulates orexin neuronal activity in a DRD2-dependent manner
Source: eLife. 2024 Apr 3;12:RP90158. doi: 10.7554/eLife.90158 (PMC10990487; doi:10.7554/eLife.90158)
Supplement: Figure 3—source data 1. [file elife-90158-fig3-data1.xlsx]

## Sheet: panel_B_one_pulse
0.0531312	-0.0396621	-0.243587
0.0192167	0.0362328	-0.238031
-0.0143139	0.112904	-0.204241
0.0222693	0.142354	-0.172926
0.0913636	0.105586	-0.1693
0.168102	0.0644001	-0.169144
0.205873	0.0786782	-0.146997
0.170053	0.132214	-0.102488
0.102812	0.162064	-0.0332033
0.0847066	0.128553	0.0565506
0.109746	0.0483436	0.116422
0.0852903	-0.0165355	0.120846
0.0342784	-0.0238252	0.0969008
-0.00289627	-0.009564	0.0601401
-0.00637849	-0.038382	0.00371606
0.012327	-0.102765	-0.035282
0.0441603	-0.146846	-0.0315248
0.0384446	-0.148355	-0.0121935
-0.0292639	-0.136717	0.00801943
-0.0685248	-0.136538	0.0331361
-0.0337217	-0.145726	0.0278732
0.0300803	-0.135916	-0.018092
0.0343102	-0.0655068	-0.0398452
-0.0217176	0.0525779	-0.00507092
-0.106135	0.14594	0.0392777
-0.159491	0.173933	0.0664252
-0.111815	0.157416	0.0812391
-0.00223601	0.142143	0.0780294
0.0763978	0.159422	0.0676247
0.072085	0.197573	0.0749871
0.0341556	0.198558	0.088707
-0.0233309	0.130708	0.0748414
-0.0849231	0.0310162	0.0375249
-0.121346	-0.0433648	-0.0119714
-0.131546	-0.0782306	-0.0733802
-0.104055	-0.0994185	-0.124093
-0.0283019	-0.123498	-0.12522
0.0861789	-0.152924	-0.0896248
0.138051	-0.179841	-0.0624812
0.101568	-0.195077	-0.0591002
0.0253476	-0.196399	-0.060718
-0.0301818	-0.207384	-0.0654008
-0.0543288	-0.227531	-0.075029
-0.0650024	-0.211736	-0.0883443
-0.0817947	-0.146956	-0.107243
-0.149711	-0.0794446	-0.133552
-0.213171	-0.0504681	-0.141753
-0.186611	-0.0608143	-0.110216
-0.0571648	-0.0704822	-0.0558961
0.0821745	-0.0301615	-0.0161966
0.164303	0.0656619	-0.00162453
0.18595	0.15713	-0.000971653
0.152803	0.18148	-0.0200797
0.132091	0.151957	-0.0552496
0.151967	0.143866	-0.0809251
0.165272	0.189424	-0.0813729
0.0898678	0.23873	-0.0479554
-0.020185	0.234904	0.0242845
-0.0669367	0.170551	0.096511
-0.0452036	0.0838105	0.108735
0.0146495	0.0362237	0.0646838
0.0759403	0.0511143	0.0252268
0.116685	0.068134	0.0100516
0.103543	0.0307354	0.0182558
0.102192	-0.0326381	0.0478912
0.128443	-0.0598939	0.0766714
0.112449	-0.0180563	0.080429
0.0227338	0.0827824	0.0827932
-0.0783759	0.16869	0.0933807
-0.129928	0.167959	0.0659834
-0.140349	0.0905081	-0.0146388
-0.0887089	0.0168031	-0.0914697
-0.0214147	-0.00271077	-0.132093
0.00474061	0.0131599	-0.147073
0.00225345	0.0363688	-0.122066
0.026691	0.0506498	-0.0503076
0.0609772	0.0400499	0.0297469
0.0315275	0.0111441	0.104034
-0.0358894	-0.0141805	0.177237
-0.100705	-0.0389473	0.216773
-0.115916	-0.079938	0.206184
-0.0678898	-0.108828	0.180239
0.0251367	-0.0950116	0.150381
0.0747932	-0.0514566	0.102295
0.0366025	-0.00653195	0.0709292
-0.00728108	0.00969686	0.0768299
-0.0205393	-0.014772	0.0825109
-0.0276193	-0.0527824	0.0647944
-0.0637016	-0.070403	0.0464192
-0.0972354	-0.0775123	0.0306936
-0.123225	-0.09088	0.00992972
-0.110229	-0.0953218	-0.00425654
-0.0232392	-0.0607078	-0.00380887
0.0854312	0.0074583	-0.0117665
0.141813	0.064667	-0.0278443
0.118229	0.0809394	-0.0304047
0.0632195	0.0618958	-0.0127934
0.00103173	0.0353451	0.0180361
-0.0270275	0.0391641	0.0615217
-0.0207681	0.0782925	0.0980415
-0.0311439	0.109092	0.0911149
-0.0595198	0.0925983	0.0359202
-0.0470406	0.0500414	-0.0285424
0.0381723	0.0109446	-0.0699419
0.101193	-0.0133336	-0.0867915
0.100931	-0.0109076	-0.0763769
0.0686701	0.00558982	-0.0286135
0.0563752	0.00343364	0.044173
0.0781464	-0.0194085	0.100117
0.131293	-0.0386636	0.117138
0.171708	-0.0521391	0.106302
0.112672	-0.0862548	0.0946523
0.00331635	-0.152906	0.109811
-0.06203	-0.224923	0.151336
-0.0587788	-0.272667	0.160903
-0.0687705	-0.280321	0.1131
-0.120417	-0.240883	0.0575914
-0.195823	-0.174592	0.0400961
-0.263897	-0.123629	0.0469218
-0.249164	-0.0976003	0.0656709
-0.133523	-0.0868326	0.0850675
0.00266649	-0.103406	0.0750152
0.0355442	-0.148083	0.0408
-0.0145369	-0.185576	0.0271488
-0.0818533	-0.196951	0.0385679
-0.148521	-0.17939	0.0532689
-0.190036	-0.126162	0.0750535
-0.192886	-0.0560714	0.0983072
-0.174511	-0.00630833	0.0885735
-0.170484	0.0141003	0.0503365
-0.122619	0.0316927	0.0178567
-0.04753	0.0770205	-0.0163333
-0.0187229	0.141807	-0.0611511
-0.0493483	0.192799	-0.083392
-0.0866326	0.203919	-0.0802397
-0.0909505	0.172888	-0.0902828
-0.0776663	0.125092	-0.101391
-0.0330758	0.0865867	-0.0986725
0.000487324	0.0552454	-0.110534
0.011317	0.0222271	-0.125536
0.0326185	0.00721827	-0.084874
0.105062	0.0155732	-0.00431538
0.183512	0.0169141	0.0459682
0.197618	-0.000529939	0.0370438
0.16069	-0.0181544	-0.0172472
0.0879362	-0.0196613	-0.0914701
0.0220111	0.0142614	-0.134278
0.00532734	0.0875048	-0.129239
0.0403933	0.168829	-0.117499
0.0486917	0.220706	-0.126044
0.00602252	0.23512	-0.12776
-0.0238567	0.225228	-0.104906
-0.0241484	0.21146	-0.0789942
0.00928428	0.201098	-0.0631071
0.0625069	0.195862	-0.0461065
0.12472	0.178961	-0.0279681
0.144914	0.145485	-0.0196575
0.136875	0.134325	-0.0221501
0.135206	0.182054	-0.0478014
0.112838	0.254393	-0.118633
0.0403589	0.289446	-0.222598
-0.0637251	0.282338	-0.301206
-0.134936	0.266128	-0.311348
-0.177001	0.278917	-0.262648
-0.167778	0.33154	-0.202134
-0.120677	0.369687	-0.172361
-0.0994017	0.325087	-0.189987
-0.126552	0.217543	-0.219906
-0.134313	0.128083	-0.213978
-0.088336	0.0958807	-0.169757
-0.0661638	0.0901951	-0.135377
-0.0717419	0.0630681	-0.128376
-0.0699385	0.000327436	-0.124469
-0.0460295	-0.0697681	-0.116157
-0.0148467	-0.104198	-0.109477
0.0352263	-0.0869032	-0.108074
0.0868539	-0.0665767	-0.136884
0.0784971	-0.0987473	-0.199925
0.0447923	-0.156336	-0.241024
0.0359174	-0.163144	-0.215142
0.0583209	-0.095899	-0.151813
0.0619824	-0.00229549	-0.0900565
0.0673671	0.0480596	-0.0367874
0.0853192	0.0150905	-0.00634534
0.0952736	-0.0692006	-0.00476758
0.125126	-0.119633	-0.0111424
0.163618	-0.108497	-0.0263332
0.157584	-0.0824043	-0.0783621
0.0787119	-0.0813085	-0.134557
0.0256411	-0.0964977	-0.143092
0.0326928	-0.0929571	-0.116672
0.0577916	-0.0614853	-0.0982516
0.0679356	-0.0317624	-0.0886132
0.0512871	-0.0339244	-0.0856675
0.0220141	-0.0591015	-0.0804586
0.00528684	-0.0588624	-0.0311067
0.053789	-0.0122875	0.0536563
0.123895	0.0359032	0.0883195
0.153255	0.0323592	0.0498301
0.138487	-0.0224785	-0.0058675
0.114106	-0.0902258	-0.0370372
0.0864751	-0.140308	-0.0370199
0.0368144	-0.15664	-0.00714703
-0.00956502	-0.158381	0.013735
-0.0667771	-0.168202	-0.0219232
-0.108567	-0.166754	-0.0919676
-0.0954755	-0.116443	-0.137187
-0.0180737	-0.0327372	-0.144086
0.0615175	0.030998	-0.137017
0.10595	0.0364889	-0.132052
0.131012	-0.0111783	-0.139373
0.123944	-0.0654065	-0.159558
0.119438	-0.0822895	-0.171342
0.142476	-0.053077	-0.15196
0.182586	-0.0151323	-0.118257
0.172652	-0.0137026	-0.0831951
0.119617	-0.0397661	-0.0308345
0.0760428	-0.0472326	0.0438491
0.0389797	-0.0182364	0.0984428
-0.00548273	0.0287194	0.0954746
-0.0454601	0.0685412	0.0410178
-0.0496311	0.0739343	-0.0216216
-0.0497603	0.0441533	-0.0540169
-0.0436999	0.0229779	-0.0381408
-0.04123	0.0257756	0.00525403
-0.096123	0.0206175	0.0262115
-0.201679	-0.0012525	0.00365466
-0.264718	-0.00245944	-0.0225031
-0.206005	0.0303804	-0.0160855
-0.0779375	0.0701486	0.0221908
0.0830249	0.0841035	0.0770995
0.211424	0.0616772	0.115032
0.230466	0.00929633	0.0927286
0.137636	-0.0465606	0.0330779
0.0409385	-0.0639461	0.00812493
0.0137308	-0.0387772	0.0234478
0.0075615	-0.00902946	0.0376797
0.00952877	0.00924219	0.0362564
0.00760972	0.0151645	0.0266434
-0.00362822	0.0021657	0.0162811
-0.0168827	-0.014601	0.0353992
0.0184654	-0.0120982	0.0828066
0.0627186	-0.00635704	0.105727
0.0252781	-0.013931	0.0841379
-0.0554291	-0.0115313	0.0680024
-0.0962519	0.00625641	0.0755885
-0.0672518	0.0107173	0.0815358
-0.0143807	-0.00391432	0.0807149
0.0369297	-0.0219829	0.0743836
0.0374735	-0.0248734	0.0427823
-0.0212081	0.00468609	0.00633822
-0.0620307	0.0549428	0.00508628
-0.0613718	0.0832667	0.0211474
-0.061189	0.0533033	0.0138095
-0.103231	-0.00578793	-0.000836395
-0.130145	-0.0381543	0.00296969
-0.125517	-0.0247934	0.0283486
-0.0900694	0.0142918	0.0937083
-0.0299704	0.0603767	0.187944
0.0193217	0.0921478	0.242034
0.0310806	0.105632	0.22224
0.0252968	0.126107	0.182718
0.0614792	0.157722	0.171854
0.0988166	0.170835	0.177518
0.110572	0.154205	0.171962
0.109444	0.119107	0.149985
0.116277	0.0722368	0.114677
0.123695	0.0378961	0.0918754
0.138147	0.0448801	0.106465
0.165702	0.0700236	0.145911
0.147198	0.0733958	0.165424
0.0817031	0.0469051	0.151213
0.0124089	0.0151649	0.11792
-0.0175327	-0.00456707	0.0727207
-0.0131222	-0.0181316	0.0150869
0.0233087	-0.0110259	-0.0426736
0.0725718	0.0389599	-0.0925887
0.0643212	0.132733	-0.126823
0.00359693	0.244126	-0.116479
-0.0593724	0.329777	-0.0407021
-0.0833302	0.342317	0.0625167
-0.106112	0.288254	0.122777
-0.106868	0.230469	0.118033
-0.0535304	0.203858	0.0929688
0.0307773	0.180029	0.0937098
0.124711	0.135963	0.133691
0.214091	0.0837345	0.192116
0.26826	0.042653	0.213062
0.231312	0.0184404	0.178989
0.170557	0.00686308	0.151122
0.146302	-0.00272359	0.184441
0.143214	-0.0208992	0.243777
0.135225	-0.0315638	0.287328
0.135939	-0.00250823	0.302908
0.141051	0.0547392	0.277923
0.105052	0.0912367	0.221099
0.0722594	0.0896373	0.1696
0.0722738	0.0569674	0.117117
0.0848968	-0.0027698	0.0391116
0.0863419	-0.0629753	-0.0299976
0.107765	-0.0975337	-0.0412684
0.153836	-0.120549	-0.0105173
0.166726	-0.144165	0.0262077
0.154699	-0.145263	0.0459065
0.109594	-0.109341	0.0276045
0.0330226	-0.0605727	-0.0126373
-0.0408287	-0.0225359	-0.00413631
-0.0265759	-0.00328042	0.0622587
0.0513431	0.0169344	0.11095
0.0966376	0.0685393	0.107071
0.0845705	0.144937	0.081464
0.0190152	0.193286	0.0644583
-0.0600685	0.17871	0.0806992
-0.112653	0.127683	0.145389
-0.106112	0.0845175	0.206747
-0.0999057	0.0553857	0.204288
-0.123067	0.0358341	0.166547
-0.121197	0.0365304	0.156171
-0.0640806	0.0553154	0.171046
0.0250375	0.0750383	0.18058
0.102776	0.0908087	0.168547
0.169508	0.0898086	0.134081
0.190857	0.0610331	0.0933719
0.169907	0.01654	0.0845734
0.136827	-0.0247845	0.11451
0.0929375	-0.0526167	0.146999
0.0259206	-0.0510693	0.15861
-0.0444281	-0.0129589	0.164918
-0.0589738	0.024273	0.167287
-0.0339966	0.0295672	0.143413
0.0253492	0.0174904	0.0793212
0.0908772	0.01905	-0.00551455
0.122057	0.024796	-0.0679667
0.0952854	-0.0081882	-0.0622223
0.0740081	-0.0803647	0.0190247
0.113611	-0.140959	0.116004
0.152599	-0.153124	0.152949
0.155316	-0.113574	0.123226
0.130572	-0.0472591	0.0911114
0.106386	0.0079849	0.103361
0.0734564	0.0474178	0.15569
0.0633998	0.110533	0.209168
0.0763026	0.201257	0.227092
0.0547915	0.267794	0.189094
0.0139327	0.266751	0.135015
0.000752001	0.194687	0.121578
0.00621771	0.084505	0.136898
-0.0455145	0.011707	0.131952
-0.130873	0.0403879	0.105523
-0.199391	0.138102	0.0859493
-0.240557	0.202884	0.0979729
-0.232681	0.186579	0.155992
-0.172271	0.137291	0.224654
-0.102434	0.109097	0.216939
-0.103266	0.0975922	0.119566
-0.134053	0.0701694	0.0167893
-0.152727	0.00251595	-0.0291511
-0.146066	-0.0847077	-0.0252509
-0.108297	-0.114898	0.00164591
-0.0278417	-0.0593446	0.0107826
0.0556621	0.0191537	-0.0318357
0.0826079	0.0468889	-0.0810444
0.101415	0.0214227	-0.0668321
0.125665	-0.00114882	0.00232819
0.121373	0.0291224	0.0669124
0.0738125	0.0966807	0.111945
0.0440514	0.14034	0.137705
0.0570812	0.125201	0.143016
0.0873387	0.0630999	0.152876
0.125949	-0.0193878	0.162089
0.121055	-0.086356	0.109606
0.0682307	-0.111256	0.0049576
0.0214548	-0.0871458	-0.053386
0.0429909	-0.0319869	-0.0189434
0.0891833	0.0178253	0.0491602
0.100761	0.0405647	0.0852963
0.0937102	0.0430907	0.0591678
0.0849023	0.0303774	-0.00980127
0.0937664	0.00925857	-0.0572461
0.104977	0.0114741	-0.0472129
0.105941	0.0477975	-0.0281337
0.0432222	0.0924007	-0.054566
-0.0448119	0.120039	-0.10215
-0.0700347	0.121248	-0.111569
-0.0162755	0.0980736	-0.0781602
0.0567384	0.0706162	-0.0452538
0.0913584	0.061046	-0.0422545
0.0806548	0.055707	-0.0632794
0.0107642	0.0238175	-0.0747534
-0.0498471	-0.0290264	-0.0453815
-0.04874	-0.0572738	0.0104311
-0.0185902	-0.0230723	0.0348489
-0.0208594	0.0523751	0.0125928
-0.0459535	0.120473	-0.0128518
-0.0528365	0.133776	0.0018403
-0.0714297	0.0792047	0.046816
-0.0967742	0.0188181	0.0888476
-0.111522	0.0226748	0.096354
-0.104133	0.0646068	0.0536144
-0.0828555	0.0794191	-0.0151859
-0.00954435	0.0681234	-0.0533222
0.119697	0.069079	-0.0428522
0.209201	0.108703	-0.0238917
0.230689	0.182772	-0.0296965
0.20632	0.237644	-0.0530633
0.166188	0.215735	-0.089737
0.107794	0.139635	-0.120845
0.0891823	0.091581	-0.119009
0.0939546	0.106274	-0.10784
0.046127	0.137586	-0.122954
-0.0325877	0.130782	-0.129749
-0.0676757	0.0863566	-0.0806051
-0.0368972	0.0523441	-0.00238483
-0.00165129	0.0736565	0.050646
0.0338178	0.155596	0.0405344
0.0601926	0.235765	-0.0389525
0.0762232	0.242266	-0.12763
0.108054	0.195647	-0.129721
0.160087	0.168269	-0.0531532
0.178989	0.185992	-0.000765904
0.111071	0.226905	-0.0190637
0.0356123	0.247379	-0.07039
0.0084457	0.222246	-0.11887
0.0266857	0.18762	-0.139576
0.0677036	0.208879	-0.125722
0.111533	0.278063	-0.119218
0.122247	0.313067	-0.153936
0.0955788	0.2601	-0.171716
0.101373	0.147666	-0.123824
0.113619	0.0574632	-0.0536429
0.0868601	0.0527007	-0.0178742
0.00734551	0.128013	-0.0235258
-0.077423	0.214856	-0.054588
-0.133984	0.244598	-0.0731094
-0.132157	0.213776	-0.0427157
-0.076394	0.160538	0.00667608
-0.051831	0.108284	0.00708555
-0.0879508	0.0698664	-0.0386884
-0.132743	0.057432	-0.0633186
-0.103887	0.0562418	-0.0337575
-0.0210248	0.0463398	0.022764
0.0664354	0.0290859	0.0579926
0.120463	-0.0198188	0.0419227
0.113293	-0.126553	-0.0207717
0.0809818	-0.260386	-0.0682901
0.0756919	-0.33126	-0.0395088
0.105294	-0.284874	0.0487549
0.0893476	-0.158145	0.105321
0.0275028	-0.0439484	0.0802234
-0.0259419	-0.00824172	0.00255888
-0.048649	-0.0379533	-0.0675511
-0.0488032	-0.070869	-0.0912453
-0.0316973	-0.0658	-0.0787354
0.00204996	-0.0507793	-0.0753875
0.000942052	-0.0783132	-0.100142
-0.00418612	-0.131783	-0.118534
0.0170316	-0.148806	-0.101552
0.0459499	-0.119731	-0.0888005
0.0368871	-0.0835874	-0.113854
0.026341	-0.07001	-0.140261
0.0616749	-0.0816428	-0.112072
0.116658	-0.0851354	-0.0171755
0.198434	-0.0378316	0.114226
0.290432	0.0420384	0.215812
0.347715	0.0809514	0.206565
0.336413	0.0365859	0.10636
0.324672	-0.0538884	0.0223134
0.344131	-0.117267	0.00594758
0.336967	-0.107916	0.0258552
0.288575	-0.0331551	0.0514236
0.204725	0.0488139	0.0587636
0.109495	0.0730183	0.0448959
0.0314493	0.0442013	0.0589175
0.0455564	0.0297232	0.129115
0.120462	0.050294	0.193714
0.153611	0.0408814	0.19749
0.145782	-0.0345184	0.160331
0.166682	-0.135715	0.11915
0.236807	-0.196017	0.0910951
0.271777	-0.179367	0.101485
0.244334	-0.13274	0.126196
0.140372	-0.139476	0.103468
0.0138248	-0.194229	0.0510163
-0.0439598	-0.197172	0.0497924
-0.0219659	-0.0917767	0.101648
-0.0158379	0.0647149	0.136782
-0.0729176	0.16854	0.127577
-0.0961869	0.153069	0.0920437
-0.0467571	0.0466977	0.0640762
0.0504439	-0.0473187	0.092602
0.134379	-0.0530143	0.180684
0.155927	0.000785642	0.258081
0.106583	0.0304147	0.276263
0.0601552	0.0153922	0.257693
0.101969	-0.00128409	0.248905
0.184709	0.0216814	0.269523
0.245698	0.0687621	0.321839
0.251747	0.0948024	0.381896
0.212891	0.0610562	0.407128
0.128061	-0.000401048	0.383045
0.0402308	-0.0040247	0.35312
-0.00985633	0.0659703	0.353659
-0.066409	0.131304	0.362771
-0.135851	0.125231	0.330975
-0.17817	0.0687879	0.249674
-0.145327	0.031084	0.152924
-0.0844316	0.0481758	0.0899106
-0.0197364	0.0849412	0.0834146
0.0246624	0.06279	0.103747
0.0232358	-0.0447175	0.100992
0.0110323	-0.155173	0.0811243
0.0438212	-0.151915	0.0897479
0.11259	-0.0251512	0.130345
0.123447	0.103776	0.149288
0.0878515	0.136375	0.110575
0.0653438	0.0902822	0.041429
0.063987	0.0421577	-0.0112276
0.0488639	0.0494769	-0.00518806
0.019821	0.102185	0.0591803
-0.00632983	0.11849	0.107201
-0.0470597	0.0561014	0.0659108
-0.0406052	-0.01826	-0.0241419
0.036659	-0.0263036	-0.0741835
0.121987	0.020427	-0.0625167
0.136352	0.0534379	-0.0192765
0.106051	0.0233793	0.0225255
0.0769237	-0.053709	0.0275075
0.0423144	-0.111374	0.0154442
0.0394405	-0.0938001	0.0456769
0.0586211	-0.0236026	0.106806
0.0673688	0.0220846	0.126597
0.0493103	0.0104946	0.101446
0.0644688	-0.0128809	0.0706298
0.0908421	0.00472178	0.0421357
0.0541388	0.0647248	0.0201409
-0.0310695	0.131873	0.0110748
-0.105825	0.145253	-0.0176366
-0.128209	0.0668231	-0.0738838
-0.0963797	-0.0499249	-0.0821325
0.00196627	-0.124375	-0.00161368
0.089142	-0.135021	0.103442
0.0992527	-0.111386	0.167587
0.0765823	-0.08085	0.178484
0.0829683	-0.0506895	0.142002
0.127471	-0.0127604	0.094028
0.175496	0.0283931	0.0764018
0.220296	0.0263752	0.0626487
0.205644	-0.0459196	-0.00304565
0.137926	-0.149782	-0.0818981
0.0826218	-0.20413	-0.0946501
0.0766705	-0.179653	-0.0348844
0.0955176	-0.118894	0.0411193
0.111634	-0.0745359	0.082234
0.139765	-0.0612666	0.0647088
0.147456	-0.0647867	0.0204772
0.150761	-0.0664901	0.0132748
0.171274	-0.0598062	0.0585909
0.209252	-0.0685801	0.0887999
0.224126	-0.101061	0.0485234
0.227844	-0.0982338	-0.0327314
0.246262	-0.017375	-0.0858502
0.23045	0.104038	-0.0771327
0.167907	0.191641	-0.0161856
0.0993159	0.192421	0.0612187
0.0751893	0.110385	0.119266
0.0815927	0.00817865	0.156904
0.126792	-0.0488905	0.200372
0.201501	-0.0714262	0.253797
0.238473	-0.118144	0.279675
0.228154	-0.186193	0.260935
0.214532	-0.185196	0.220825
0.226838	-0.0575949	0.18909
0.21003	0.139865	0.176102
0.176174	0.282619	0.182185
0.145463	0.27767	0.186941
0.100007	0.134596	0.159502
0.0596788	-0.0198267	0.112879
0.0823779	-0.0635456	0.0959301
0.167106	-0.0158979	0.100237
0.207836	0.0236895	0.0882852
0.199344	0.0200068	0.0575976
0.170008	0.0069876	0.0172265
0.137132	0.0281549	-0.03003
0.112381	0.0875347	-0.0439116
0.123697	0.125466	0.00282513
0.136794	0.0738954	0.0654809
0.0928294	-0.0483942	0.0997268
0.0488413	-0.142241	0.110161
0.0407184	-0.143978	0.0971583
0.0418111	-0.0892517	0.0577148
0.00970327	-0.0445381	0.0248323
-0.0371491	-0.0357184	0.0020383
-0.0882084	-0.0285657	-0.0429443
-0.133298	0.0228905	-0.0901545
-0.116619	0.110088	-0.0903884
-0.0646876	0.162624	-0.0605499
-0.0357689	0.128941	-0.0446442
-0.0379481	0.0626517	-0.0362904
0.0179386	0.0497664	-0.0166265
0.142298	0.106873	0.00644452
0.269214	0.173422	0.0380006
0.350405	0.178229	0.0581437
0.349259	0.108867	0.0169439
0.28498	0.0373001	-0.074188
0.206517	0.0323158	-0.127262
0.167106	0.0654676	-0.0973098
0.118785	0.0450824	-0.0232773
0.0542785	-0.0635085	0.0399504
0.0209132	-0.192641	0.0606815
0.049781	-0.242764	0.0279534
0.13268	-0.186259	-0.0231923
0.236116	-0.083588	-0.0504615
0.314196	-0.0296696	-0.0597805
0.283862	-0.0611762	-0.0801946
0.169192	-0.121903	-0.106181
0.0617723	-0.13204	-0.109426
0.0213479	-0.0950086	-0.0883259
0.0250881	-0.0828128	-0.0601032
0.0358364	-0.12392	-0.0326997
0.0523795	-0.180477	-0.0126355
0.0462918	-0.185723	-0.0128901
0.0443681	-0.0998032	-0.0178339
0.0649501	0.0390065	-0.00599996
0.0910516	0.124065	0.0114178
0.0743743	0.0941753	0.00743307
0.0471398	0.0064629	-0.00860646
0.0457708	-0.0407032	-0.0151026
0.023756	-0.0242812	-0.0125801
-0.017556	-0.000877193	-0.00673691
-0.0314923	-0.0252398	0.00328506
0.0135307	-0.0951961	0.00469225
0.0631274	-0.154883	0.00610587
0.113588	-0.154649	0.035621
0.155117	-0.130941	0.0847274
0.149348	-0.151935	0.099278
0.112735	-0.190162	0.0695526
0.0977246	-0.150225	0.0411736
0.108976	-0.0304978	0.0421068
0.0830308	0.0686403	0.0837434
0.0486302	0.0714325	0.158129
0.0324829	-0.0134132	0.204321
0.0209698	-0.101565	0.170689
0.0232133	-0.0986694	0.111575
0.0596128	-0.00965982	0.10393
0.0917247	0.0619701	0.141721
0.0408272	0.0340977	0.179466
-0.0361155	-0.0652802	0.182021
-0.0794042	-0.142848	0.12551
-0.0708701	-0.140143	0.046374
-0.0232836	-0.0737111	0.0226961
0.0472335	-0.0140288	0.0605128
0.0783827	-0.00193076	0.0917143
0.0307839	0.000388398	0.097725
-0.0128346	0.051462	0.0917367
-0.0181662	0.134347	0.0666028
-0.00553568	0.180884	0.0310172
-0.00982171	0.168522	0.0237254
-0.0176684	0.128055	0.036961
-0.0427975	0.0935521	0.031001
-0.0725717	0.0887994	0.0136762
-0.0609603	0.104977	0.0169368
-0.0382634	0.103066	0.0319514
-0.0408945	0.0707249	0.0420003
-0.0601867	0.0467225	0.0393009
-0.0503629	0.0532253	0.012367
-0.0261253	0.069259	-0.025743
0.00965248	0.0535773	-0.0362231
0.0599906	-0.00761927	-0.0143554
0.081365	-0.0830962	0.000955728
0.0653382	-0.12347	-0.00405834
0.0431438	-0.11	-0.00834936
0.0611432	-0.0903063	-0.000272329
0.0845694	-0.120497	0.0108901
0.104816	-0.182615	0.0170366
0.116778	-0.196641	0.00842158
0.0956891	-0.112905	-0.0196855
0.0305143	0.0353794	-0.0519841
-0.0354402	0.170377	-0.0550725
-0.0426666	0.223103	-0.0257326
-0.0222659	0.1927	0.00543028
0.0231797	0.157687	0.0275609
0.0879084	0.156264	0.0599692
0.14374	0.129153	0.0955753
0.14294	0.0226067	0.106537
0.11051	-0.106964	0.0786661
0.0835517	-0.154793	0.026753
0.0395096	-0.0841308	-0.0212082
-0.00627805	0.0401858	-0.0275393
-0.0372742	0.125397	0.0211878
-0.0558698	0.133595	0.0833935
-0.075564	0.112562	0.130248
-0.0375675	0.139145	0.189395
0.0650594	0.221902	0.283352
0.132779	0.293567	0.393326
0.123459	0.312736	0.506058
0.0622996	0.307262	0.604884
-0.000796859	0.306161	0.647848
-0.0563932	0.308781	0.631464
-0.0446994	0.311813	0.599779
0.0186119	0.29891	0.560469
0.0574806	0.257743	0.509795
0.0657293	0.223818	0.480355
0.0887382	0.230002	0.479423
0.126842	0.253926	0.472442
0.118539	0.259696	0.47716
0.0904629	0.246963	0.526063
0.0543123	0.243203	0.589682
0.00976481	0.274461	0.620026
-0.0291761	0.344816	0.618093
-0.0400983	0.40923	0.592471
-0.0436685	0.403555	0.548807
-0.0628515	0.339578	0.518285
-0.0482162	0.290547	0.50345
-0.010569	0.297413	0.464032
0.0171596	0.327737	0.413997
0.0302646	0.334983	0.414368
0.052752	0.292534	0.46624
0.0653087	0.225419	0.518009
0.0527818	0.197865	0.549288
0.0604939	0.224279	0.558786
0.0703973	0.24105	0.534764
0.0688186	0.194097	0.498555
0.0635185	0.111085	0.484531
0.0842584	0.0648882	0.48733
0.0910171	0.102952	0.489845
0.0686279	0.197441	0.501366
0.036858	0.262828	0.516455
-0.0147388	0.246712	0.510262
-0.0556632	0.192049	0.482095
-0.0388265	0.191333	0.462842
0.0512729	0.261471	0.461988
0.134281	0.316944	0.469679
0.194968	0.292186	0.48267
0.260537	0.209459	0.494664
0.321646	0.137709	0.481978
0.355485	0.125183	0.442238
0.360105	0.165288	0.402404
0.341213	0.184851	0.386967
0.262388	0.128465	0.394859
0.176258	0.0346142	0.416122
0.138198	-0.0213857	0.43742
0.118384	-0.0163816	0.441329
0.061598	0.0269401	0.436553
-0.00213595	0.0776144	0.443587
-0.00897022	0.114724	0.449659
0.017216	0.14911	0.42366
0.066999	0.208183	0.380859
0.101313	0.278545	0.371027
0.0896446	0.295981	0.401086
0.0384757	0.227026	0.441244
0.0251322	0.131146	0.466644
0.0607334	0.0850609	0.441795
0.0698764	0.101349	0.360842
0.0555142	0.136768	0.275537
0.0549871	0.136689	0.22549
0.0817344	0.0851117	0.186876
0.0982082	0.0314586	0.151031
0.12832	0.0302435	0.132499
0.164045	0.0590996	0.119926
0.164494	0.0646792	0.11114
0.150261	0.0497194	0.136783
0.146409	0.0482281	0.176618
0.136956	0.0677692	0.171287
0.0943729	0.0906032	0.125749
0.0839466	0.0793944	0.093219
0.121502	0.0233624	0.0970115
0.170222	-0.0295087	0.137039
0.212618	-0.0135965	0.197845
0.236306	0.0582915	0.229713
0.226903	0.0958986	0.208968
0.180864	0.0311184	0.186731
0.164292	-0.104578	0.19453
0.166503	-0.200105	0.190504
0.162467	-0.167739	0.163957
0.149053	-0.030118	0.157533
0.145763	0.0924504	0.190617
0.146259	0.101533	0.24654
0.147963	0.0240211	0.310093
0.171577	-0.0408816	0.342946
0.163749	-0.0364025	0.310384
0.107663	0.0186603	0.251679
0.0470462	0.0780271	0.24357
0.0469014	0.103885	0.297359
0.0928744	0.101226	0.373004
0.149746	0.116415	0.432483
0.19126	0.157816	0.453168
0.172517	0.184581	0.431825
0.120284	0.162205	0.396064
0.0880262	0.118571	0.373131
0.101293	0.0934202	0.360191
0.109348	0.0824074	0.352501
0.109062	0.0533042	0.370235
0.129861	-0.0105562	0.417476
0.151408	-0.0874394	0.453246
0.158877	-0.109093	0.448476
0.159483	-0.0278446	0.410386
0.173111	0.0992202	0.350514
0.163371	0.158124	0.281601
0.168683	0.119257	0.238611
0.217988	0.0366383	0.236129
0.262434	-0.0319359	0.234901
0.240607	-0.0539417	0.205568
0.176254	-0.0386657	0.173341
0.128406	-0.0358599	0.16375
0.09703	-0.06058	0.176182
0.11173	-0.0666553	0.195496
0.143478	-0.0361495	0.205454
0.123969	-0.0216675	0.197773
0.0445607	-0.0663209	0.209335
0.010027	-0.125247	0.271963
0.0675257	-0.106198	0.344022
0.126755	0.0380183	0.366999
0.138015	0.250318	0.347841
0.0980048	0.397807	0.306633
0.0403909	0.394608	0.245916
-0.00317199	0.308337	0.1937
0.0156948	0.272338	0.175722
0.0580694	0.322067	0.172108
0.0377504	0.369228	0.173214
-0.0119087	0.32569	0.196125
-0.0275048	0.186098	0.21997
0.0158707	0.0351551	0.20648
0.0778154	-0.0231754	0.174572
0.150865	0.0256252	0.158538
0.178083	0.103214	0.154081
0.142182	0.142194	0.164633
0.114834	0.139601	0.195837
0.132317	0.12957	0.220476
0.155674	0.134927	0.206955
0.136606	0.153143	0.173706
0.118712	0.149133	0.144118
0.115649	0.102383	0.121714
0.131612	0.0443749	0.12339
0.15139	0.031152	0.155333
0.128151	0.0698173	0.171337
0.0357421	0.115711	0.147405
-0.0635017	0.143595	0.122899
-0.0548823	0.171361	0.133231
0.0435874	0.231257	0.164893
0.153325	0.311502	0.198441
0.199287	0.347165	0.218798
0.169232	0.269277	0.207603
0.112798	0.10388	0.170313
0.11485	-0.0304877	0.14313
0.187988	-0.0433213	0.146941
0.201717	0.0363591	0.170624
0.116115	0.102796	0.204819
0.0159448	0.0819119	0.246427
0.0146982	-0.00581118	0.270864
0.0960419	-0.0798474	0.246643
0.187434	-0.0743138	0.1829
0.216887	-0.016961	0.114331
0.167225	0.00373114	0.0646911
0.137192	-0.0434063	0.0522787
0.20743	-0.102253	0.0828838
0.335968	-0.128956	0.122643
0.369228	-0.138211	0.14132
0.289346	-0.155091	0.142266
0.187337	-0.178171	0.141135
0.129699	-0.177189	0.134411
0.130014	-0.108974	0.133792
0.16089	0.0258894	0.154887
0.170821	0.138705	0.174575
0.100987	0.140001	0.169885
0.0246262	0.0493139	0.16736
0.000878313	-0.0321821	0.195242
-0.00449653	-0.040235	0.23964
-0.0358008	0.00510256	0.284906
-0.0656806	0.0490415	0.321824
-0.0550601	0.0626295	0.322433
-0.0273148	0.0669492	0.284671
0.0320732	0.107888	0.244622
0.0755887	0.171442	0.209385
0.0432106	0.186207	0.169103
-0.0514951	0.128452	0.157157
-0.0844289	0.0550337	0.198168
-0.014718	0.0258976	0.253968
0.0755698	0.0527999	0.296002
0.139823	0.0956159	0.320445
0.146749	0.0958418	0.305411
0.0993788	0.0377742	0.238821
0.0307597	-0.00702532	0.173635
0.00447517	0.0224446	0.147636
-0.0165783	0.0996541	0.136693
-0.0838744	0.150053	0.127002
-0.14476	0.129651	0.118548
-0.144973	0.0603464	0.080717
-0.0731098	0.00580259	0.00681429
0.0273715	0.00936801	-0.0646385
0.113246	0.030942	-0.121418
0.107605	-0.00626233	-0.179642
0.0273532	-0.114118	-0.209132
-0.0280558	-0.205694	-0.182138
-0.0307172	-0.203983	-0.133504
-0.0320404	-0.116932	-0.0995844
-0.0755446	-0.0158673	-0.0804396
-0.116438	0.0408548	-0.0753899
-0.139296	0.0670194	-0.0803124
-0.115289	0.129282	-0.0708528
-0.0624072	0.240057	-0.0415462
-0.0380333	0.310368	-0.0247563
-0.0612035	0.253612	-0.0422594
-0.0500414	0.111097	-0.0715251
0.0747839	-0.00579409	-0.0835588
0.234523	-0.0291642	-0.0688013
0.32814	0.020414	-0.0313523
0.303602	0.0706046	0.0152841
0.189881	0.0674636	0.0463083
0.0569001	0.0333977	0.059441
0.00784451	0.0412491	0.0792258
0.0649029	0.103477	0.116877
0.119196	0.143647	0.140609
0.115263	0.101916	0.131136
0.0801061	0.0107995	0.100337
0.0616388	-0.0517124	0.0589577
0.0370515	-0.0312789	0.0182386
0.019414	0.0582675	-0.000914113
0.021081	0.134579	0.000943706
0.0183716	0.125037	-0.000961396
0.0394628	0.060367	-0.00246596
0.102167	0.0234682	0.015657
0.151764	0.0388541	0.022388
0.0847281	0.0661491	-0.0153861
-0.0379935	0.074241	-0.0711666
-0.12414	0.0644511	-0.11019
-0.150683	0.0663911	-0.132745
-0.137226	0.108467	-0.140075
-0.114882	0.171529	-0.136169
-0.12281	0.192265	-0.14842
-0.173568	0.145402	-0.163795
-0.16665	0.0799091	-0.146189
-0.0740668	0.0502604	-0.113917
0.0201223	0.0485357	-0.108583
0.0294786	0.0404033	-0.115536
-0.0211756	0.00836458	-0.121221
-0.0634812	-0.0249651	-0.139153
-0.0671004	-0.0220471	-0.146075
-0.00406854	0.012631	-0.11697
0.0598101	0.0153866	-0.0907019
0.0666092	-0.055267	-0.105426
0.0436763	-0.139948	-0.13469
0.0841233	-0.146081	-0.146075
0.170033	-0.0569642	-0.135146
0.202922	0.0534732	-0.0860117
0.163039	0.102734	-0.0130639
0.0686706	0.0777202	0.0245261
-0.00109154	0.0483338	0.00887952
0.0111364	0.0809083	-0.0118109
0.0936506	0.150605	-0.01101
0.101767	0.167801	-0.00420202
-0.0348158	0.0984034	0.00527689
-0.213776	0.00804971	0.0119925
-0.294285	-0.00823928	0.000497507
-0.215228	0.0649614	-0.0186608
-0.0459197	0.153336	-0.0228778
0.0952495	0.156752	-0.0365949
0.10414	0.0672795	-0.0953189
0.0446574	-0.00753843	-0.17767
0.040395	0.0325273	-0.223179
0.0950499	0.148204	-0.204285
0.115569	0.21757	-0.134838
0.0587954	0.197329	-0.0534992
-0.00678715	0.144651	-0.00308881
-0.0356859	0.129176	0.000645742
0.00765851	0.164029	-0.00716416
0.0785021	0.199724	0.00220262
0.0823612	0.182812	0.00304354
-0.0159366	0.129765	-0.0362305
-0.110426	0.116854	-0.10425
-0.0964991	0.176476	-0.167943
-0.0396528	0.24861	-0.208544
-0.0216823	0.267877	-0.214772
-0.0861785	0.227442	-0.188273
-0.19626	0.165456	-0.155945
-0.278444	0.134239	-0.132044
-0.227073	0.162762	-0.104825
-0.0745791	0.200117	-0.081112
0.0160382	0.176641	-0.0834507
-0.00166127	0.11172	-0.0990707
-0.0382356	0.0854522	-0.0926358
0.000301325	0.11559	-0.0675582
0.0841313	0.147779	-0.0315827
0.166654	0.131149	0.0209225
0.181249	0.0676692	0.0677849
0.105527	0.0141432	0.0710185
0.0275114	0.0362291	0.0418536
0.00942604	0.117267	0.00204303
0.00578086	0.178563	-0.0456275
-0.0777323	0.1853	-0.0756554
-0.185033	0.182203	-0.0718081
-0.239372	0.213613	-0.0794838
-0.220387	0.26398	-0.127433
-0.162953	0.290517	-0.165685
-0.128692	0.259311	-0.151748
-0.164288	0.184246	-0.10642
-0.25304	0.133374	-0.0514545
-0.26544	0.148432	-0.00515855
-0.183038	0.181813	0.00403926
-0.0841518	0.153678	-0.0150521
-0.0433877	0.052881	-0.023522
-0.047807	-0.0453226	-0.0262834
-0.0647532	-0.0532946	-0.0569195
-0.0615042	0.0464941	-0.0945107
-0.0117534	0.158776	-0.105554
0.0137656	0.185914	-0.101514
-0.0262311	0.141433	-0.0918171
-0.0931874	0.136869	-0.0687851
-0.117045	0.237991	-0.0511119
-0.114939	0.390533	-0.0453552
-0.128958	0.473632	-0.0186535
-0.172576	0.428146	0.0387136
-0.259871	0.30986	0.0771704
-0.333958	0.218573	0.0629131
-0.325929	0.205409	0.0105296
-0.218324	0.23267	-0.0491831
-0.113688	0.234958	-0.0847387
-0.0740691	0.214827	-0.0774278
-0.0875618	0.22318	-0.0552576
-0.132601	0.267835	-0.0639258
-0.183161	0.297861	-0.0982978
-0.233199	0.264011	-0.105604
-0.281982	0.1496	-0.0723904
-0.351848	-0.00046642	-0.048272
-0.365643	-0.076206	-0.0722592
-0.27465	-0.0229393	-0.128052
-0.147565	0.0848805	-0.177415
-0.0974829	0.129056	-0.18951
-0.13294	0.086279	-0.157814
-0.17219	0.0268628	-0.114099
-0.175204	0.0222201	-0.0902888
-0.100005	0.077567	-0.0745794
0.0240701	0.138737	-0.0402455
0.103986	0.147647	-0.00842055
0.0686611	0.120294	-0.0041524
-0.00680757	0.116865	-0.0203367
-0.0145113	0.13796	-0.045711
0.0295405	0.121439	-0.0691909
0.0973651	0.058575	-0.0601755
0.146963	0.00430851	-0.0192586
0.147718	0.00389461	0.00377644
0.103881	0.0555729	-0.0070914
0.109143	0.115424	-0.0161214
0.159467	0.126623	-0.0108421
0.145204	0.0932325	-0.000199833
0.0601502	0.0952264	0.0161752
-0.0262952	0.184481	0.0168306
-0.0596488	0.308601	-0.0257915
-0.050661	0.370765	-0.0763657
0.0123919	0.321391	-0.0957963
0.071792	0.196156	-0.109017
0.0872126	0.0882295	-0.143305
0.10396	0.0668312	-0.176504
0.152645	0.0988019	-0.182861
0.177222	0.0858136	-0.155341
0.103687	0.00356303	-0.0804288
-0.0112292	-0.0834048	0.00799779
-0.10394	-0.107844	0.0297311
-0.124365	-0.0675386	-0.0317927
-0.0644537	-0.00153762	-0.107792
0.0105115	0.0374357	-0.153161
0.0136752	0.0370961	-0.171806
-0.0495719	0.0368787	-0.172392
-0.0665084	0.0569003	-0.17602
-0.0317648	0.0616684	-0.206216
0.00376547	0.0246188	-0.229058
-0.0135753	-0.0286722	-0.20657
-0.0834769	-0.0584241	-0.171769
-0.166397	-0.0449439	-0.167577
-0.188709	-0.0051429	-0.176646
-0.120319	9.9249e-05	-0.169962
-0.0542369	-0.0596755	-0.142247
-0.041246	-0.132582	-0.0938107
-0.0591379	-0.129098	-0.0336014
-0.0526886	-0.0348073	0.00628059
-0.0471903	0.0692183	0.00529722
-0.0637357	0.11121	-0.0134062
-0.107199	0.0918668	-0.01376
-0.182391	0.0774944	0.0156946
-0.240637	0.117218	0.0619613
-0.225544	0.191883	0.102907
-0.138388	0.22567	0.114463
-0.0723161	0.184992	0.0962389
-0.042272	0.123591	0.08292
-0.013377	0.100643	0.0968374
0.0246527	0.0964466	0.103214
0.0704893	0.06092	0.078992
0.113816	-0.0118166	0.0545968
0.121687	-0.0798694	0.0654967
0.031708	-0.0963152	0.11154
-0.0784318	-0.039404	0.170681
-0.110822	0.0480866	0.201708
-0.061041	0.0857445	0.165882
-0.000230613	0.05334	0.0942626
0.0429834	0.0253405	0.0624074
0.0656805	0.063613	0.078545
0.0365949	0.147945	0.0959898
0.00817903	0.217983	0.100945
0.0154462	0.232008	0.11137
0.0456933	0.20104	0.134157
0.0589808	0.1871	0.183201
0.0803301	0.236714	0.242513
0.107981	0.303233	0.250819
0.114176	0.299456	0.200673
0.144082	0.210595	0.164391
0.209383	0.0996277	0.174615
0.263541	0.02707	0.189068
0.260018	0.0199902	0.190379
0.237566	0.0429582	0.184412
0.179055	0.0461505	0.172351
0.0351653	0.0341202	0.178291
-0.136886	0.0640583	0.221341
-0.236288	0.140899	0.259538
-0.210036	0.199899	0.252404
-0.10772	0.19037	0.22902
0.0276736	0.131274	0.22154
0.122881	0.0914204	0.211499
0.165227	0.134271	0.194178
0.199361	0.249646	0.176773
0.231067	0.351855	0.140839
0.220109	0.359622	0.0909449
0.153465	0.288529	0.0831497
0.0956372	0.214539	0.131595
0.0449412	0.184876	0.178952
0.00965524	0.182627	0.190032
0.0037995	0.163568	0.178196
0.0135025	0.108009	0.151255
-0.00377432	0.0534651	0.119534
-0.024468	0.056544	0.104931
0.018362	0.100094	0.0984044
0.0894941	0.116921	0.0780487
0.13889	0.0873497	0.0574345
0.131809	0.0789389	0.0622711
0.0722637	0.142734	0.08514
-0.0246393	0.239643	0.105458
-0.0915895	0.285673	0.114349
-0.0774212	0.234448	0.100633
-0.0417666	0.122787	0.0547992
-0.0226227	0.0639347	0.00952714
-0.0120072	0.133939	0.00368765
0.0217851	0.270608	0.0236788
0.0511352	0.335681	0.029624
0.0843483	0.287537	0.0176949
0.109078	0.197438	0.00807345
0.0716537	0.155375	0.0148222
-0.0091172	0.192619	0.0519732
-0.0614707	0.254197	0.116868
-0.0520309	0.248937	0.170796
-0.0357226	0.165734	0.193751
0.00105266	0.0885867	0.203303
0.0608491	0.0730896	0.206765
0.102752	0.0791085	0.174719
0.108358	0.0546194	0.101665
0.112174	0.01596	0.0268959
0.113797	0.0151905	-0.0220618
0.0487361	0.0781271	-0.0322917
-0.0413756	0.171683	0.00161514
-0.0849381	0.2119	0.0445392
-0.0562283	0.14339	0.0405221
0.0126172	0.034607	0.00436323
0.0884964	0.00223652	-0.00705084
0.116864	0.0841156	0.026694
0.0631439	0.208533	0.0996136
0.021355	0.280054	0.18957
0.0344806	0.248716	0.241111
0.0589949	0.153864	0.23014
0.0331791	0.075732	0.207803
-0.00650234	0.0282834	0.210071
-0.0333098	-0.0352182	0.208376
-0.0490542	-0.115347	0.192158
-0.0367043	-0.145418	0.184821
-0.0253138	-0.064844	0.187891
-0.0302374	0.0909017	0.184614
-0.0376172	0.218469	0.176061
-0.00161202	0.236047	0.151894
0.0244612	0.163155	0.0956234
-0.012116	0.091463	0.0506392
-0.0752154	0.0909242	0.0728328
-0.112127	0.141133	0.140808
-0.104286	0.175197	0.201624
-0.0687418	0.176747	0.24225
-0.014888	0.178496	0.261725
-0.00092296	0.209517	0.25991
-0.0247571	0.255892	0.258279
-0.0362311	0.27671	0.262031
-0.0159124	0.230259	0.236996
0.0213277	0.132974	0.18017
0.0707659	0.054105	0.13757
0.145463	0.0431946	0.141557
0.185507	0.0806153	0.178305
0.179491	0.120794	0.216941
0.143675	0.141396	0.231581
0.0942583	0.160214	0.206179
0.0277672	0.201451	0.150942
-0.018312	0.264045	0.111237
-0.00634183	0.284873	0.111989
0.0101853	0.209843	0.124701
0.0118465	0.094048	0.12407
0.00629205	0.0585587	0.11788
0.00210021	0.130075	0.104513
-0.0228401	0.219844	0.0777171
-0.0228941	0.244977	0.0466901
0.0185724	0.200181	0.0205115
0.0263557	0.143484	0.00554307
-0.0150775	0.140322	0.0280355
-0.0498623	0.188186	0.0910966
-0.0306769	0.203258	0.130826
0.0146083	0.128989	0.0975248
0.0993247	0.0133018	0.0219261
0.19937	-0.0534367	-0.0335073
0.242661	-0.0302915	-0.0372486
0.2276	0.0609884	0.0167948
0.212427	0.152015	0.0919812
0.227843	0.175886	0.113556
0.225258	0.126138	0.0592157
0.218628	0.0694191	-0.00905123
0.195755	0.0476787	-0.0463925
0.132408	0.0458475	-0.0580426
0.04961	0.0551162	-0.052574
0.0139713	0.0936243	-0.0504038
0.0305401	0.161764	-0.0819944
0.0420325	0.237271	-0.116596
0.0708066	0.274189	-0.104375
0.110815	0.230108	-0.0640451
0.135033	0.12403	-0.0400645
0.122023	0.0501133	-0.0302237
0.0917356	0.0594072	-0.0294964
0.0362176	0.112963	-0.0466508
-0.0415955	0.139589	-0.0610637
-0.0809753	0.100704	-0.0646306
-0.0908683	0.0260294	-0.0951579
-0.107418	-0.00974252	-0.158624
-0.142795	0.0345277	-0.196443
-0.149186	0.106437	-0.180094
-0.123833	0.128402	-0.142656
-0.0758013	0.0970328	-0.113769
0.00472933	0.0845777	-0.101694
0.0690868	0.132965	-0.115476
0.073502	0.198382	-0.127313
0.0235141	0.205569	-0.0997891
-0.00893859	0.138731	-0.0571363
-0.0272348	0.0628454	-0.0464674
-0.0329531	0.0691354	-0.0598902
-0.0334135	0.163288	-0.0713355
-0.0598569	0.252133	-0.0838645
-0.100271	0.241772	-0.108061
-0.0939072	0.152668	-0.141594
-0.00361336	0.066271	-0.180355
0.0835686	0.0313322	-0.210451
0.117371	0.0297798	-0.208668
0.0960507	0.010338	-0.179842
0.0469833	-0.0560822	-0.167393
0.00466093	-0.131199	-0.193732
0.00595925	-0.133452	-0.223102
0.0419499	-0.0474231	-0.209765
0.0340323	0.0539645	-0.15654
-0.00282337	0.110831	-0.0963506
0.00033033	0.132199	-0.0642068
0.0774117	0.143951	-0.0894483
0.170505	0.164007	-0.155567
0.234201	0.192723	-0.213278
0.243274	0.198878	-0.248104
0.174857	0.152481	-0.288367
0.109127	0.0810269	-0.332195
0.111508	0.0356328	-0.344847
0.163005	0.0217879	-0.313672
0.176571	0.0110195	-0.240708
0.173816	-0.00326563	-0.12619
0.190454	-0.0143144	-0.00531243
0.197601	-0.00152668	0.0658319
0.175848	0.0571006	0.072914
0.120671	0.141339	0.0371232
0.0419507	0.180035	-0.0278648
-0.0520329	0.152306	-0.0853511
-0.0701435	0.119749	-0.0973462
0.00250849	0.141071	-0.0826493
0.0875974	0.203207	-0.0754174
0.135913	0.262799	-0.0578295
0.166879	0.277115	-0.0225301
0.201221	0.244952	-0.011374
0.224972	0.212247	-0.0297607
0.265413	0.209788	-0.0442935
0.271759	0.207158	-0.0421397
0.200178	0.161226	-0.019599
0.106165	0.0813215	0.031013
0.0884679	0.0141752	0.0712269
0.141323	-3.65614e-07	0.0524326
0.176298	0.0417034	0.00135807
0.175886	0.0921515	-0.0361215
0.128835	0.0953604	-0.0711924
0.0757585	0.0590669	-0.112592
0.0510997	0.0501508	-0.14727
0.0558434	0.109483	-0.196992
0.0244695	0.183374	-0.283428
-0.0500178	0.188522	-0.342395
-0.0905419	0.0980511	-0.300729
-0.0836873	-0.0266542	-0.180887
-0.0557021	-0.100753	-0.0517292
-0.04441	-0.0816453	0.0495242
-0.0490948	-0.0182116	0.106815
-0.0777501	0.0218102	0.125029
-0.0800858	0.0267069	0.123557
-0.0241878	0.0212841	0.105984
0.0189716	0.00292828	0.0704099
-0.00884218	-0.0415308	0.045191
-0.0828141	-0.0980958	0.0563891
-0.122744	-0.148693	0.080335
-0.122916	-0.166777	0.0774417
-0.0858078	-0.107398	0.0477076
-0.04075	0.0260469	0.0184162
-0.0336594	0.148655	-0.00170528
-0.0582429	0.175157	-0.0190678
-0.0570145	0.107347	-0.040582
-0.00127804	0.00978955	-0.0689227
0.0200378	-0.0625448	-0.0952268
-0.0104132	-0.0887762	-0.0917936
-0.0517957	-0.0898401	-0.0580325
-0.0619436	-0.092132	-0.0408739
-0.0364865	-0.0852	-0.0647949
0.0435863	-0.0341077	-0.0965948
0.147353	0.0392205	-0.0972446
0.177447	0.0725068	-0.0555369
0.148465	0.0471336	0.0190897
0.117852	0.00508237	0.0960329
0.102136	-0.0131086	0.122864
0.0700585	0.00859182	0.0930485
0.0608122	0.0502968	0.0539723
0.0986635	0.0725293	0.0338062
0.144752	0.0667212	0.0157316
0.186975	0.0793005	-0.0134053
0.188865	0.1264	-0.0600726
0.115174	0.15931	-0.136013
-0.0249559	0.137227	-0.207233
-0.111132	0.0944456	-0.226842
-0.0996401	0.0989959	-0.211582
-0.0567776	0.176804	-0.193846
-0.0348729	0.283838	-0.161212
-0.0493181	0.329377	-0.118121
-0.0880496	0.259462	-0.0933
-0.136409	0.132674	-0.075732
-0.125485	0.0676248	-0.0587841
-0.0854237	0.118363	-0.0835134
-0.0739436	0.222873	-0.149993
-0.0866633	0.26397	-0.198407
-0.0773361	0.187014	-0.201422
-0.0413223	0.042118	-0.181141
-0.00860702	-0.0567059	-0.151296
0.0306114	-0.0597756	-0.130214
0.0339609	-0.0165652	-0.137043
-0.00590187	-0.00218313	-0.14311
-0.0460523	-0.0139383	-0.11502
-0.0427055	-0.00661414	-0.0890006
-0.025041	0.0436326	-0.112001
-0.0245664	0.109893	-0.163356
-0.0147448	0.140299	-0.209203
0.00164829	0.10966	-0.247235
0.0487343	0.0630619	-0.266407
0.134583	0.0769424	-0.251424
0.221628	0.155647	-0.220421
0.224013	0.225121	-0.190645
0.148696	0.227765	-0.15515
0.0722366	0.174934	-0.121688
0.00605063	0.122524	-0.112862
-0.04612	0.110757	-0.119938
-0.0880446	0.124175	-0.112834
-0.11676	0.108978	-0.0850622
-0.155948	0.0398937	-0.0538591
-0.148788	-0.0281457	-0.0282506
-0.0579237	-0.0375261	-0.0191291
0.0574649	-0.00362029	-0.0454477
0.125568	0.0137827	-0.0966903
0.134252	0.000824287	-0.128109
0.122366	-0.0152253	-0.120291
0.0914227	-0.000800062	-0.0906557
0.0901941	0.0570921	-0.0598986
0.124799	0.130791	-0.0394124
0.140059	0.156231	-0.0356682
0.105348	0.121079	-0.0289876
0.0752938	0.0745716	-0.00342614
0.0849034	0.0543255	0.017655
0.0654471	0.0548128	0.0156258
0.0215892	0.0653747	0.0197632
-0.0166324	0.0661759	0.0601756
-0.036779	0.0354109	0.118025
-0.0449002	-0.0124028	0.166323
-0.0161828	-0.0329955	0.19684
0.0235387	-0.019024	0.200257
0.00520347	0.00873526	0.183115
-0.0293621	0.04937	0.180182
-0.0306108	0.101164	0.188937
0.00121045	0.140179	0.162093
0.0110934	0.148436	0.0913927
0.00498899	0.118273	0.0110225
-0.0213228	0.0496817	-0.0548645
-0.0647042	-0.0174787	-0.0754424
-0.0659061	-0.019045	-0.0261598
-0.0151831	0.0565538	0.0513091
0.033993	0.149985	0.0987389
0.0337639	0.205611	0.134091
0.0391258	0.190361	0.186027
0.0589858	0.119699	0.229092
0.0735359	0.0463455	0.240105
0.0898684	0.0142527	0.220361
0.0966868	0.0116688	0.168301
0.0705999	0.0108966	0.106391
0.0202205	0.00430038	0.0853784
0.014188	0.00203142	0.104781
0.0308104	0.0220981	0.113664
0.0363325	0.0770035	0.113681
0.0286313	0.143368	0.149198
0.0279629	0.173159	0.210964
0.0495584	0.141874	0.248347
0.0990475	0.0845175	0.232134
0.163369	0.0554404	0.158492
0.154985	0.0770165	0.0506286
0.080932	0.130018	-0.0272732
0.024184	0.185864	-0.0367121
0.0483135	0.21758	-0.0112491
0.107619	0.217608	0.00364423
0.153225	0.209171	0.00737026
0.181036	0.198233	0.0161655
0.179029	0.174839	0.0423413
0.178401	0.141339	0.0927554
0.183767	0.126113	0.145615
0.159065	0.132321	0.147765
0.0540865	0.136722	0.0798246
-0.0602064	0.126811	-0.00033494
-0.091861	0.118695	-0.0323292
-0.0604597	0.125543	-0.0257011
-0.0294292	0.155502	-0.0167435
-0.0470699	0.190154	-0.0191007
-0.103743	0.180491	-0.0236147
-0.176836	0.0958057	-0.00375185
-0.167307	-0.0132536	0.058695
-0.0497225	-0.0692206	0.137052
0.0685728	-0.0485795	0.169371
0.0931785	0.0264158	0.141362
0.0549045	0.117127	0.101941
0.0302359	0.168087	0.0914525
0.00480591	0.155517	0.106947
-0.00657894	0.118537	0.12579
-0.0234577	0.0973049	0.126332
-0.0666022	0.0843655	0.112785
-0.100792	0.0645075	0.133105
-0.0519854	0.0343192	0.208425
0.045509	-0.0160533	0.262795
0.0726623	-0.0798001	0.225856
0.0352032	-0.12381	0.129721
-0.00886564	-0.13447	0.041745
-0.0167659	-0.131877	-0.0103973
0.00545911	-0.116303	-0.016411
0.0586755	-0.0913509	0.00166581
0.0958746	-0.0722714	0.00140886
0.0653636	-0.0645801	0.000833046
0.0199413	-0.0498017	0.0432295
0.00490845	-0.0277614	0.10077
0.0184056	-0.00870603	0.118672
0.0279802	0.0126973	0.105359
0.0520842	0.0415455	0.0844646
0.0660298	0.0659478	0.0599557
0.0552325	0.0823815	0.0557461
0.0600351	0.0795554	0.0741657
0.0823361	0.0514106	0.0594897
0.107184	0.0194317	-0.0187049
0.127163	0.0267289	-0.10907
0.161417	0.072186	-0.153112
0.16365	0.113101	-0.142602
0.135436	0.108645	-0.086452
0.115342	0.0501051	-0.0151386
0.113322	-0.0398576	0.0233011
0.114771	-0.11364	0.0295695
0.117343	-0.119762	0.0534639
0.144516	-0.0690386	0.100919
0.16177	-0.0248848	0.122645
0.168462	-0.0393966	0.0938476
0.173887	-0.0919084	0.0447301
0.16853	-0.131328	0.0231131
0.123849	-0.120037	0.0583678
0.0627532	-0.0557354	0.12994
0.0438257	0.0261491	0.183876
0.053839	0.077808	0.19159
0.0960808	0.0971832	0.179325
0.163248	0.106652	0.183863
0.219418	0.113084	0.198604
0.208777	0.100921	0.188204
0.161802	0.0735788	0.135779
0.12011	0.0329796	0.0674377
0.0599088	-0.0238049	0.0204527
0.00480646	-0.0738186	0.0229128
-0.00456747	-0.0830293	0.0657001
0.0388649	-0.0586204	0.0939376
0.0712811	-0.0264116	0.0794383
0.106449	0.00428849	0.0643273
0.163691	0.0274496	0.0899336
0.209491	0.0355252	0.129349
0.225235	0.0362036	0.138416
0.217065	0.0299167	0.110795
0.175128	0.000571203	0.0615945
0.0640853	-0.0380701	0.0288007
-0.0310396	-0.0457697	0.0420535
-0.0459917	-0.0200663	0.0673215
-0.0088781	-0.00228854	0.0408484
0.0345492	-0.00488088	-0.0278404
0.0691772	-0.0180874	-0.0734402
0.0746992	-0.0495629	-0.0655746
0.0355821	-0.106989	-0.0148193
0.0402619	-0.152165	0.0437604
0.106921	-0.135646	0.0474363
0.16904	-0.0403222	-0.0237809
0.163479	0.096252	-0.0895903
0.11334	0.205261	-0.0845822
0.0450726	0.238381	-0.0435553
-0.0341345	0.224228	-0.0166125
-0.0754929	0.214498	-0.0185485
-0.100502	0.222583	-0.0485765
-0.142499	0.224377	-0.0695987
-0.194312	0.215428	-0.0319717
-0.189132	0.200261	0.0307534
-0.134178	0.173059	0.0390709
-0.0618148	0.129327	0.0056026
0.0245129	0.0767219	-0.00730897
0.0754673	0.0326479	0.0102935
0.0617666	0.0199733	0.0392155
0.0117498	0.0561949	0.0718639
-0.00408946	0.114701	0.0913515
0.00598427	0.148515	0.0915367
0.0282517	0.136611	0.0945625
0.0643949	0.10637	0.0962985
0.0916688	0.0834041	0.0530208
0.0991066	0.0739077	-0.0275873
0.0857181	0.0689998	-0.0774247
0.0699845	0.0513007	-0.0662595
0.0225481	0.0066685	-0.0286803
-0.0217057	-0.0420726	-0.00584591
-0.0186181	-0.0635309	-0.0227803
0.0111331	-0.0527194	-0.0836198
0.0156714	-0.0323662	-0.147896
0.000564714	-0.0100194	-0.159344
0.0145552	-0.00425524	-0.107298
0.0278122	-0.0303355	-0.0353235
0.0361523	-0.0659998	0.0171357
0.0279072	-0.0742898	0.0387333
-0.0209389	-0.0613244	0.0364003
-0.118895	-0.0497508	0.0303852
-0.18479	-0.0361295	0.0312164
-0.160503	-0.0102916	0.0175299
-0.109424	0.0172743	-0.0380781
-0.0784345	0.0361817	-0.106159
-0.0790942	0.040821	-0.12647
-0.0923078	0.0105407	-0.0936984
-0.10839	-0.0429352	-0.0440047
-0.0767499	-0.071769	-0.010769
-0.0163946	-0.0557237	-0.0134419
-0.0161757	-0.0284873	-0.0441261
-0.0562425	-0.0144551	-0.0601235
-0.0450204	-0.0177462	-0.0347517
0.0456468	-0.044059	0.00429105
0.116708	-0.0901014	0.036416
0.126336	-0.126871	0.0746687
0.058577	-0.147643	0.106651
-0.0607732	-0.154785	0.0973388
-0.124525	-0.134763	0.0481283
-0.0606793	-0.0875165	-0.0216677
0.0703658	-0.0438947	-0.0936413
0.132655	-0.0194504	-0.114216
0.125563	-0.0117847	-0.0445145
0.0852726	-0.0148407	0.0529972
0.0526724	-0.019607	0.0861165
0.0503212	8.11456e-05	0.0463658
0.0740296	0.043054	-0.0261313
0.0869965	0.0808397	-0.0941083
0.0752838	0.097269	-0.113173
0.101394	0.105833	-0.0870043
0.14899	0.129321	-0.0731452
0.166575	0.17445	-0.0833177
0.13051	0.22996	-0.0731609
0.0750149	0.266675	-0.0405877
0.0249542	0.272196	-0.0150196
0.0146303	0.268567	0.0157466
0.0898211	0.27923	0.0624943
0.180165	0.290232	0.0927635
0.206423	0.270209	0.0996419
0.158111	0.206985	0.115282
0.107191	0.127705	0.138833
0.0852449	0.0703142	0.139137
0.101286	0.0582316	0.1157
0.133316	0.0657504	0.0916485
0.119031	0.0519377	0.0804961
0.0686038	0.0093874	0.0940994
0.0387698	-0.00248699	0.119352
0.0654377	0.0447318	0.110897
0.0635287	0.108083	0.0575389
-0.0119635	0.135232	0.0112995
-0.128065	0.125069	0.00714945
-0.21795	0.102383	0.0207764
-0.221371	0.0902154	0.023266
-0.127158	0.105355	0.0124261
0.012972	0.12893	-0.00819402
0.0910381	0.12142	-0.0389447
0.119407	0.0785732	-0.0651698
0.145386	0.0241575	-0.0766556
0.156884	-0.0325994	-0.0890992
0.109937	-0.0804653	-0.098311
0.0320097	-0.0983524	-0.071729
-0.0143999	-0.0885742	-0.00561624
-0.0316711	-0.0665411	0.0538137
0.0119586	-0.0174923	0.0627696
0.109093	0.0519698	0.00966714
0.192381	0.0785663	-0.0866629
0.177436	0.0139343	-0.16167
0.107367	-0.101972	-0.156912
0.0583922	-0.201174	-0.0975462
0.0288477	-0.236663	-0.0504043
0.024542	-0.193891	-0.029425
0.0215738	-0.101463	-0.00759107
-0.00864801	-0.0156662	0.01908
-0.0656546	0.0485211	0.0364106
-0.055906	0.103439	0.0242767
0.0118309	0.14247	-0.0386027
0.0301198	0.147593	-0.123869
-0.0169569	0.12767	-0.152506
-0.0551406	0.087609	-0.105828
-0.0262432	0.0322438	-0.0583388
0.0379075	-0.0123556	-0.0580555
0.103703	-0.0194326	-0.090269
0.097764	0.00674137	-0.128045
0.017408	0.0366369	-0.136468
-0.0342121	0.0413017	-0.0932463
0.00444496	0.000101004	-0.0521085
0.0726072	-0.0764893	-0.0721385
0.0705782	-0.138507	-0.109447
0.0262931	-0.14857	-0.101008
-0.0178674	-0.119078	-0.0593635
-0.015592	-0.0747382	-0.0196799
0.0359608	-0.0359855	-0.00316771
0.0780812	-0.00979854	-0.0307628
0.0372625	0.00454941	-0.0744701
-0.0612934	0.0247084	-0.0566355
-0.0932844	0.0510671	0.03828
-0.0479068	0.0761399	0.134375
0.0114863	0.0889696	0.176899
0.0109804	0.094777	0.176037
-0.0496044	0.0978748	0.150372
-0.114385	0.108113	0.110106
-0.078935	0.13407	0.0650316
0.0824575	0.16832	0.00617574
0.235826	0.168923	-0.0657154
0.277651	0.10468	-0.0996037
0.220693	0.00449044	-0.0558967
0.160384	-0.0739008	0.0256771
0.129904	-0.0959954	0.0766342
0.133302	-0.0609519	0.0804231
0.13853	-0.00507033	0.0668628
0.0906748	0.0222286	0.0654376
0.0151187	0.0150655	0.0880677
-0.0130252	0.0151679	0.119782
0.0427027	0.0365217	0.124701
0.100579	0.0478788	0.0846203
0.132156	0.041129	0.0309029
0.148159	0.03597	0.00600841
0.153269	0.0437828	0.00152546
0.153719	0.0611836	-0.0149957
0.158839	0.0885689	-0.0585722
0.145506	0.0989157	-0.125567
0.0647416	0.0724485	-0.182099
-0.000136555	0.0298308	-0.175594
0.0302515	-0.00256094	-0.101841
0.12491	-0.0333879	-0.0327224
0.179849	-0.057801	-0.0212464
0.173658	-0.0532883	-0.0468131
0.133208	-0.0271704	-0.0729622
0.0657938	-0.016146	-0.0827309
0.0328088	-0.0290573	-0.0721269
0.044963	-0.0605742	-0.063376
0.0481109	-0.0952203	-0.0795834
-0.00475116	-0.099957	-0.0842794
-0.0451945	-0.0539769	-0.0341733
-0.030902	0.00480069	0.0405241
-0.00682829	0.015783	0.0856639
0.00117244	-0.0338744	0.0938198
-0.0321586	-0.116003	0.0661296
-0.0952265	-0.189098	0.00398103
-0.141165	-0.216703	-0.0493852
-0.0846295	-0.203488	-0.0686472
0.0258745	-0.183249	-0.0799901
0.0860197	-0.157195	-0.0747205
0.0891353	-0.099469	-0.0197098
0.0886766	-0.010236	0.0461072
0.120646	0.0715922	0.0504495
0.149132	0.131066	-0.0079908
0.149615	0.167471	-0.0840508
0.0621718	0.190481	-0.135562
-0.0843312	0.199833	-0.109012
-0.17855	0.191987	0.00121182
-0.160455	0.159832	0.113673
-0.0953301	0.118511	0.154159
-0.0724848	0.0923602	0.135432
-0.0841681	0.0860301	0.102907
-0.1067	0.0760435	0.079068
-0.0798649	0.0450803	0.0741458
0.00358338	0.000685423	0.074201
0.0701012	-0.0422114	0.0357594
0.0444833	-0.0693638	-0.0399065
-0.0205374	-0.0639375	-0.0938423
-0.0105849	-0.0406298	-0.105974
0.0502794	-0.0390872	-0.108272
0.0886098	-0.0725477	-0.111321
0.0546602	-0.0992179	-0.098915
-0.0159113	-0.0855777	-0.0722709
-0.0622237	-0.0545213	-0.0480712
-0.00510764	-0.0414085	-0.0470153
0.135996	-0.0701113	-0.0899034
0.212125	-0.127516	-0.168715
0.153376	-0.172122	-0.228589
0.0296335	-0.166918	-0.217653
-0.0370162	-0.127746	-0.151154
-0.0387993	-0.0769129	-0.0955026
0.000750065	-0.00438043	-0.0983454
0.027249	0.102577	-0.150947
-0.000562895	0.201092	-0.220257
-0.0359946	0.242122	-0.260366
-0.0053126	0.207648	-0.242962
0.0727384	0.106799	-0.20331
0.0725183	-0.0273437	-0.18938
-0.00305543	-0.137153	-0.199824
-0.0708922	-0.199733	-0.213187
-0.0711209	-0.233606	-0.226767
-0.00474165	-0.24387	-0.224483
0.0941605	-0.204578	-0.191797
0.156763	-0.122403	-0.152013
0.123329	-0.0450693	-0.124428
0.0908495	-0.0114837	-0.101965
0.133899	-0.0315714	-0.0956715
0.208768	-0.0700268	-0.124542
0.217224	-0.0657091	-0.159243
0.157545	-0.00355499	-0.158699
0.0716516	0.0550358	-0.131184
0.00207998	0.0513762	-0.09616
0.0214799	-0.00218658	-0.06283
0.100157	-0.0551035	-0.054126
0.143833	-0.082425	-0.0720512
0.0952383	-0.0789725	-0.0646981
0.041188	-0.0614623	-0.0182789
0.047625	-0.0374669	0.0104431
0.10259	0.00184708	0.00299192
0.156879	0.0489236	-0.00354709
0.130428	0.0489639	0.0120448
0.019337	-0.0333067	0.0512832
-0.0951164	-0.151076	0.109165
-0.105496	-0.213822	0.135784
-0.0562102	-0.199024	0.0776067
-0.0408099	-0.158975	-0.0278897
-0.0734083	-0.157344	-0.0933365
-0.091675	-0.206759	-0.0907
-0.0252074	-0.272812	-0.0452696
0.111029	-0.303258	0.0108275
0.247575	-0.280904	0.0349664
0.268367	-0.236061	0.0032288
0.180678	-0.214669	-0.043528
0.0810231	-0.231278	-0.051953
0.0368686	-0.264767	-0.0343701
0.0227046	-0.276153	-0.0216789
-0.00122978	-0.222346	-0.014519
-0.0252963	-0.128713	-0.0146377
-0.0494007	-0.0760117	-0.0261412
-0.0151709	-0.109156	-0.0229679
0.0943914	-0.175955	0.0101458
0.208386	-0.197607	0.0421462
0.211965	-0.142213	0.0442608
0.123035	-0.0396114	0.0186892
0.0476343	0.0421598	-0.0224088
0.0131618	0.0494629	-0.0676242
0.00872433	0.0130756	-0.0850328
0.00228632	-0.00490857	-0.05064
-0.0220202	0.00698427	0.0107894
-0.0645826	0.00764889	0.0577977
-0.0463931	-0.0210853	0.0737208
0.0391583	-0.069598	0.056472
0.0768031	-0.119446	0.00331259
0.0225393	-0.141231	-0.058155
-0.0499542	-0.112505	-0.0864198
-0.0564065	-0.0540819	-0.081894
-0.0269875	0.00779997	-0.0648137
0.0187001	0.073751	-0.0474079
0.0357651	0.13482	-0.0508043
-0.00220383	0.157627	-0.0813739
-0.0281539	0.138188	-0.0986893
0.0387047	0.10356	-0.0797317
0.152378	0.0740897	-0.0661888
0.161939	0.0702575	-0.0881656
0.0570511	0.0959158	-0.119042
-0.0950033	0.108386	-0.128673
-0.208599	0.0598138	-0.105074
-0.228248	-0.0172079	-0.0342441
-0.149453	-0.0580349	0.0626899
-0.0508715	-0.0328192	0.123046
-0.00299219	0.0231928	0.12562
0.0405631	0.054416	0.0928287
0.0806146	0.0399658	0.0299819
0.0691473	0.0165059	-0.0562
-0.0271266	0.022465	-0.12068
-0.151455	0.0425896	-0.147216
-0.246935	0.021666	-0.161228
-0.273031	-0.0503171	-0.153313
-0.19664	-0.128984	-0.113225
-0.0972961	-0.165226	-0.081892
-0.0630036	-0.160252	-0.0776442
-0.108473	-0.149903	-0.0635599
-0.149641	-0.179163	-0.0302187
-0.166684	-0.250424	-0.00676768
-0.174823	-0.303407	0.00162958
-0.185622	-0.273385	-0.000164675
-0.221062	-0.165683	-0.0243628
-0.244639	-0.0469128	-0.0554954
-0.192258	0.0384811	-0.0644768
-0.0338371	0.0879433	-0.0705481
0.120233	0.128257	-0.109368
0.184435	0.169165	-0.161268
0.154688	0.190996	-0.180854
0.078621	0.157867	-0.155634
0.018674	0.0752221	-0.0849085
0.00697073	0.00489888	0.0220697
0.0209651	-0.00287218	0.11579
-0.0287818	0.0367362	0.143108
-0.120702	0.0897809	0.110649
-0.176263	0.127191	0.0525172
-0.164987	0.136097	-0.0193655
-0.132282	0.124016	-0.0949155
-0.105096	0.120292	-0.147744
-0.0794975	0.103858	-0.159705
-0.076761	0.0190813	-0.141634
-0.053983	-0.12784	-0.114203
0.0132054	-0.250621	-0.0963798
0.085236	-0.285358	-0.10579
0.0769959	-0.24342	-0.126086
0.0227101	-0.179936	-0.121118
0.000213936	-0.148719	-0.0917568
0.0164019	-0.16308	-0.0770793
0.05906	-0.17997	-0.0940406
0.0872443	-0.156438	-0.129147
0.0625539	-0.111605	-0.171255
-0.0251962	-0.0819726	-0.188044
-0.0662253	-0.0699257	-0.148431
-0.0269117	-0.0691084	-0.084449
-0.00346733	-0.0809802	-0.0557694
-0.0507416	-0.0887423	-0.0690103
-0.12102	-0.0938584	-0.0959575
-0.147293	-0.124107	-0.125712
-0.127803	-0.179789	-0.140021
-0.0468574	-0.215013	-0.116601
0.031924	-0.21648	-0.0622879
0.0282102	-0.21029	0.0042206
-0.0469307	-0.215341	0.0792328
-0.122107	-0.235703	0.135238
-0.179318	-0.262534	0.130016
-0.256587	-0.261197	0.0890614
-0.311231	-0.225579	0.0711306
-0.316789	-0.186769	0.08027
-0.252279	-0.167797	0.0930798
-0.126959	-0.144219	0.100698
0.0124807	-0.101962	0.0744008
0.0677194	-0.0679462	-0.00299212
0.0037924	-0.0732665	-0.0684143
-0.0768869	-0.109711	-0.0628527
-0.118107	-0.122042	-0.024233
-0.122636	-0.0572128	-0.00553291
-0.1215	0.0665192	-0.0104425
-0.112017	0.143948	-0.0328017
-0.109629	0.0978521	-0.0641754
-0.092479	-0.0245903	-0.0781828
-0.0302423	-0.108104	-0.0844663
0.02247	-0.0952179	-0.123538
0.0265891	-0.0100257	-0.180809
0.00688861	0.0883011	-0.201638
0.0203622	0.157825	-0.180674
0.0443014	0.191504	-0.153945
0.0649922	0.220845	-0.13154
0.0738882	0.258734	-0.113572
0.0385889	0.281806	-0.110685
-0.020889	0.253016	-0.113637
-0.043374	0.185429	-0.103018
0.00161069	0.114918	-0.0877011
0.0248806	0.0682046	-0.0877296
-0.00350345	0.0499928	-0.100493
-0.0435195	0.037077	-0.115671
-0.0490005	-0.00782474	-0.136628
-0.00800267	-0.0697234	-0.156124
0.0762363	-0.0790165	-0.163472
0.170233	-0.0186062	-0.167389
0.192332	0.0428786	-0.180182
0.167438	0.0495716	-0.185744
0.14237	0.0132069	-0.160697
0.117637	-0.0203978	-0.123035
0.059078	0.00369412	-0.0995277
0.0056218	0.0925311	-0.0907448
-0.0135466	0.170454	-0.0923204
-0.0425259	0.16556	-0.0992496
-0.0698363	0.114739	-0.0934375
-0.0767973	0.0971396	-0.0733922
-0.0698189	0.124996	-0.0699876
-0.0759609	0.143731	-0.0896184
-0.050741	0.123763	-0.105788
0.00747041	0.0798586	-0.10653
0.0325536	0.0604656	-0.0915287
0.0251414	0.095285	-0.0508467
0.0150943	0.143326	-0.000707877
0.0135035	0.130881	0.0166205
0.000374764	0.0638684	0.00157812
0.0319061	0.00874907	-0.0152858
0.0952643	0.00338995	-0.0354282
0.120606	0.0269351	-0.0733269
0.0946045	0.0571907	-0.111257
0.0587867	0.0801769	-0.139444
0.045613	0.104953	-0.165294
0.048252	0.148125	-0.164506
0.0817644	0.189337	-0.120311
0.079138	0.183803	-0.071131
0.00111891	0.122489	-0.0344913
-0.0964372	0.0516516	0.013171
-0.127413	0.02671	0.06079
-0.0889564	0.063513	0.0729391
-0.0393057	0.131377	0.0616812
0.00578161	0.18064	0.0438271
0.010503	0.181241	0.00412406
-0.00811256	0.157428	-0.0395721
-5.99807e-05	0.146562	-0.0473677
0.0499677	0.140323	-0.0292828
0.0772483	0.0884722	-0.0154773
0.0546533	-0.00615472	0.00125401
0.0310154	-0.0878298	0.0203117
0.004786	-0.101129	0.014555
-0.0236083	-0.0520053	-0.0093018
-0.0546735	0.0149868	-0.0245517
-0.0782796	0.0325191	-0.0463352
-0.114983	-0.015929	-0.0885015
-0.125536	-0.0669831	-0.120672
-0.069552	-0.0468597	-0.123046
0.00374967	0.036581	-0.112075
0.0496811	0.107525	-0.0915809
0.0653237	0.10766	-0.0600852
0.0720393	0.0299618	-0.0383692
0.0462673	-0.0824753	-0.0421089
0.0277003	-0.153732	-0.0621903
0.0427879	-0.151577	-0.093137
0.0448358	-0.121286	-0.139667
-9.23187e-05	-0.0982777	-0.189306
-0.0544877	-0.0640112	-0.222007
-0.0731833	-0.00230321	-0.227076
-0.0882201	0.069171	-0.196627
-0.0852339	0.127268	-0.128522
-0.0651207	0.133517	-0.0432242
-0.058398	0.0621857	0.0149812
-0.0710307	-0.0447937	0.022537
-0.0584066	-0.109482	-0.0116988
-0.0245981	-0.114945	-0.0809833
-0.0464947	-0.084931	-0.167586
-0.0920512	-0.0429293	-0.221318
-0.105448	-0.0107926	-0.210658
-0.0731274	-0.0107283	-0.170137
-0.0451973	-0.0229347	-0.144879
-0.0289818	-0.0152863	-0.146436
-0.0376595	0.0124796	-0.168315
-0.0916068	0.0327746	-0.183761
-0.127263	0.0370368	-0.155689
-0.102166	0.0203585	-0.100784
-0.0336639	-0.0117233	-0.0748862
0.0191399	-0.0328035	-0.085028
0.0695378	-0.0389395	-0.103437
0.104189	-0.0595669	-0.127142
0.10499	-0.114007	-0.148835
0.11	-0.18715	-0.142323
0.130114	-0.253308	-0.116495
0.127586	-0.288214	-0.0964767
0.0636466	-0.263935	-0.0609874
-0.00726148	-0.179829	-0.00332385
-0.0608632	-0.0611678	0.025119
-0.0912646	0.0538283	0.00636282
-0.0859253	0.119359	-0.0241402
-0.0566061	0.120077	-0.0489337
-0.0302463	0.0822618	-0.0619263
-0.0223628	0.0605773	-0.0431066
0.000961643	0.0641078	-0.0137426
0.00645611	0.0633654	-0.0203846
-0.0110885	0.0339368	-0.0412908
-0.0228047	-0.000543902	-0.0254783
-0.0036205	-0.0136411	0.0104846
0.0274417	-0.00422177	0.0178423
0.0672308	0.00597814	-0.0157234
0.130571	-0.00669772	-0.0853544
0.15672	-0.0592224	-0.182964
0.131093	-0.133676	-0.267307
0.0834865	-0.182767	-0.294857
0.0459291	-0.182553	-0.269479
-0.00698048	-0.149762	-0.210071
-0.0763194	-0.0989045	-0.122472
-0.143124	-0.0458265	-0.0393378
-0.204003	-0.00683716	-0.0148135
-0.199124	0.018505	-0.0540496
-0.0926566	0.033321	-0.111011
0.0592918	0.019804	-0.143714
0.119843	-0.0418101	-0.13362
[truncated: 1,501 more rows]

## Sheet: panel_B_ten_pulses
-0.0693775	-0.318312	0.0749749
0.0184144	-0.259782	0.0347123
0.0538478	-0.160245	-0.00140388
0.0482581	-0.086427	-0.0202694
0.0508641	-0.0623686	-0.00352786
0.0592268	-0.0643447	-0.00907967
0.0158232	-0.0369487	-0.0580901
-0.0617639	0.0106252	-0.0582581
-0.145729	0.00107779	0.0318732
-0.199575	-0.0827407	0.111558
-0.19796	-0.166841	0.110728
-0.145674	-0.183083	0.0572193
-0.0852286	-0.134503	-0.0253264
-0.0476922	-0.0719775	-0.101403
0.0021586	-0.0539083	-0.106976
0.0605374	-0.0743739	-0.070343
0.0940459	-0.0596838	-0.0860871
0.0742849	0.0293485	-0.14328
0.025003	0.117833	-0.154466
-0.0366372	0.106518	-0.107499
-0.0873137	0.00739952	-0.0324816
-0.0597175	-0.0935543	0.0600639
0.0453214	-0.141456	0.108751
0.161147	-0.132236	0.062798
0.212347	-0.101316	-0.00957192
0.202504	-0.0915941	-0.0181969
0.141951	-0.0969119	-0.00101354
0.0573513	-0.0561313	-0.0107059
-0.00433874	0.021375	-0.012162
-0.0476721	0.0606735	0.0110971
-0.0886692	0.0314831	0.0274308
-0.111015	-0.0292297	0.0449151
-0.0778681	-0.0749761	0.0584953
-0.037772	-0.0673479	0.00501482
-0.0350424	-0.0136533	-0.0825999
-0.0495984	-0.00541929	-0.0712162
-0.0475263	-0.123277	0.0437924
-0.0231486	-0.301391	0.136058
0.0281087	-0.387432	0.145295
0.0867971	-0.324173	0.0937168
0.0720362	-0.190913	0.000243353
0.00491345	-0.0946985	-0.0655951
-0.0295969	-0.0810476	-0.0306389
-0.0247183	-0.104844	0.0285254
-0.0417444	-0.0743226	0.00100436
-0.0810629	0.0234244	-0.0705134
-0.111365	0.0923102	-0.0868671
-0.13611	0.0829453	-0.0519779
-0.119747	0.0747522	0.00931142
-0.0719512	0.137541	0.0854559
-0.0671178	0.234772	0.104102
-0.15914	0.290876	0.0309816
-0.267358	0.276465	-0.0307402
-0.293802	0.228046	-0.0184545
-0.234374	0.231057	-0.00472366
-0.134104	0.31916	-0.0252796
-0.0660923	0.408325	-0.0311804
-0.0652721	0.371368	-0.0225139
-0.115496	0.195245	-0.0159016
-0.124906	-0.0227223	0.0124927
-0.0703566	-0.176647	0.0359552
-0.00576831	-0.210794	-0.0151642
0.0364534	-0.136776	-0.0988123
0.0585274	-0.00888068	-0.118571
0.0775447	0.12995	-0.0906877
0.0859882	0.271127	-0.0811319
0.096305	0.371498	-0.0887559
0.0703603	0.362136	-0.0993701
-0.016984	0.254657	-0.113404
-0.107145	0.129118	-0.0893045
-0.111227	0.0450256	-0.0216971
-0.0202144	0.0133074	-0.00812575
0.0799295	0.00602185	-0.0865032
0.144037	-0.035945	-0.150195
0.143742	-0.139019	-0.130597
0.0967316	-0.235719	-0.0645607
0.0548358	-0.246349	0.00637191
0.0631079	-0.166058	0.0531058
0.0856701	-0.0676558	0.0317676
0.0714496	-0.0211644	-0.0173506
0.0596874	-0.0491923	0.00404337
0.0800809	-0.0993011	0.0704531
0.131547	-0.089422	0.0633185
0.183009	-0.0170837	-0.0301103
0.205496	0.0251233	-0.130914
0.159233	-0.0126089	-0.193079
0.0755939	-0.0576333	-0.183029
0.0410645	-0.0357708	-0.0921266
0.0482818	0.026646	-0.0257395
0.0449175	0.053645	-0.0820013
0.0326783	-0.00558373	-0.181069
0.0703707	-0.122589	-0.196878
0.141821	-0.188748	-0.141476
0.193537	-0.113142	-0.0712324
0.185421	0.0529001	-0.00397939
0.0980669	0.164101	0.0284639
-0.016198	0.150763	0.0355781
-0.0646247	0.0708258	0.092594
-0.0207563	0.0133729	0.187612
0.00985628	0.012947	0.187562
-0.0158432	0.0368602	0.071671
-0.0524223	0.0066449	-0.0376639
-0.0537569	-0.0918726	-0.0751938
-0.00438033	-0.143028	-0.0532856
0.0901283	-0.0477493	0.0219114
0.160633	0.121224	0.0901763
0.111699	0.228661	0.0606434
-0.0107573	0.225884	-0.0236141
-0.102524	0.154793	-0.0439177
-0.114616	0.081892	-0.0110462
-0.0827501	0.0528081	0.00174698
-0.0469576	0.0367718	-0.00107749
-0.0383399	-0.0314458	-0.00762547
-0.0539488	-0.140788	-0.0329915
-0.0365925	-0.218576	-0.028102
0.00375839	-0.230713	0.0384104
-0.000274659	-0.208861	0.0847038
-0.0936787	-0.190082	0.0621917
-0.197925	-0.185998	0.04423
-0.223768	-0.192134	0.0706802
-0.156872	-0.174609	0.0886448
-0.0328416	-0.116843	0.0861241
0.062478	-0.0641513	0.0873498
0.0699233	-0.0692867	0.0766312
-0.00597682	-0.104178	0.0685186
-0.0644786	-0.102106	0.11565
-0.0633107	-0.038751	0.16662
-0.0337212	0.0687089	0.12176
0.00493611	0.148253	0.00883194
0.0654731	0.135672	-0.0627501
0.153479	0.0703478	-0.0665025
0.228729	0.0586533	-0.0206475
0.272235	0.116103	0.0494719
0.233541	0.167481	0.0695461
0.106479	0.169502	0.0144004
-0.0356335	0.143768	-0.0179681
-0.101608	0.139222	0.0233667
-0.0904534	0.181569	0.0439217
-0.0616023	0.24496	-0.0225226
-0.0237806	0.265017	-0.114996
-0.00367202	0.213646	-0.165194
-0.0140141	0.153527	-0.133661
-0.0273973	0.130484	0.00796716
-0.0122488	0.11234	0.1895
0.00623277	0.0629685	0.266181
0.0132925	0.0100918	0.223778
0.0407829	-0.0173403	0.178876
0.0554695	-0.0217606	0.165642
0.0198572	-0.00401718	0.147277
-0.0467131	0.0109222	0.12911
-0.0891232	-0.0145762	0.113051
-0.105435	-0.0589694	0.0703312
-0.0784258	-0.0508541	0.0563289
0.000653195	0.0183659	0.131483
0.0666101	0.086629	0.205914
0.0677282	0.105801	0.175156
0.0252242	0.0831939	0.0881838
-0.0160731	0.056936	0.030381
-0.073417	0.0729025	0.00876998
-0.120255	0.131873	0.0215196
-0.135371	0.1518	0.0617407
-0.147009	0.0800353	0.0640653
-0.150621	0.0114963	0.0372013
-0.0956437	0.0559996	0.0997919
0.0234605	0.170014	0.262377
0.13016	0.23323	0.384106
0.193786	0.199015	0.395193
0.199808	0.104313	0.34041
0.153999	0.0444265	0.254548
0.1071	0.0949478	0.192154
0.120308	0.203299	0.221348
0.183234	0.236822	0.288475
0.227563	0.162131	0.28176
0.252479	0.0574275	0.2295
0.267117	0.00530397	0.219189
0.270115	0.0218054	0.235698
0.238351	0.0586942	0.232235
0.191071	0.0525902	0.21312
0.149901	-0.0143937	0.169464
0.125132	-0.0789622	0.101078
0.142284	-0.0898564	0.0703597
0.16157	-0.0712347	0.100647
0.125658	-0.0757357	0.110633
0.02741	-0.105689	0.0695605
-0.0430093	-0.129575	0.0379983
-0.0398301	-0.115758	0.028502
0.00904229	-0.0414326	0.0114649
0.0707351	0.0671635	0.0100492
0.112157	0.149881	0.0331914
0.116688	0.196291	0.029474
0.0848378	0.235506	0.0108702
0.0745568	0.260894	0.0536273
0.0978743	0.229921	0.142302
0.142382	0.135081	0.200792
0.210582	-0.00281712	0.211798
0.279891	-0.129593	0.171212
0.289231	-0.18347	0.0648832
0.207364	-0.15277	-0.0412867
0.109338	-0.104626	-0.0613087
0.0354345	-0.102712	-0.0428078
0.00453595	-0.118977	-0.0577652
0.0343702	-0.111822	-0.0588805
0.119216	-0.0917373	0.00493335
0.204886	-0.0819513	0.0841086
0.246935	-0.0780835	0.150702
0.246789	-0.0753209	0.209489
0.190873	-0.0623899	0.208479
0.115244	-0.0269455	0.134958
0.0745058	-0.0114286	0.0738278
0.073904	-0.0757568	0.04887
0.0566689	-0.178624	0.0047509
0.0412676	-0.202125	-0.0330627
0.0957976	-0.0967295	0.00157184
0.190396	0.0667068	0.0682222
0.247056	0.180937	0.124584
0.225602	0.176212	0.200698
0.151234	0.0704583	0.268371
0.0608965	-0.0345319	0.252054
0.0355281	-0.0350597	0.187479
0.0922398	0.0516098	0.163415
0.134443	0.119506	0.156234
0.103541	0.10147	0.128524
0.0400749	0.0138599	0.115062
0.00315852	-0.086124	0.111599
-0.00768347	-0.128273	0.0818277
0.0315447	-0.0907895	0.0753899
0.0992145	-0.0327048	0.126172
0.148878	-0.00250406	0.149624
0.182774	0.0225348	0.103522
0.230728	0.0552142	0.0607382
0.268669	0.0648033	0.0557435
0.239292	0.0579729	0.0682421
0.173538	0.0669656	0.110197
0.106608	0.101195	0.163008
0.058267	0.150497	0.149455
0.0234873	0.183812	0.0958057
-0.00672071	0.156896	0.103224
-0.0596538	0.0689231	0.158319
-0.141944	-0.0160015	0.167658
-0.175696	-0.055206	0.11872
-0.123052	-0.0682419	0.0475299
-0.0112018	-0.0844887	-0.038371
0.0923567	-0.116076	-0.107123
0.165486	-0.151153	-0.127766
0.202986	-0.164784	-0.154948
0.215144	-0.124829	-0.223589
0.240263	-0.0663346	-0.262209
0.260262	-0.0639366	-0.2323
0.225951	-0.129596	-0.192053
0.115466	-0.191854	-0.174104
0.00742798	-0.189024	-0.156741
-0.0533819	-0.122301	-0.155227
-0.0757752	-0.0299762	-0.159329
-0.068163	0.0254745	-0.109364
-0.0516184	0.0111006	-0.0358414
-0.0537273	-0.0495209	-0.0504106
-0.071069	-0.118574	-0.154169
-0.0554126	-0.178335	-0.246946
-0.0402747	-0.210804	-0.289725
-0.0597166	-0.181954	-0.294383
-0.076255	-0.100113	-0.259065
-0.0491806	-0.0298186	-0.225512
0.00687418	-0.0126826	-0.241661
0.0628753	-0.0343048	-0.243498
0.0989723	-0.0807639	-0.158562
0.0622393	-0.134452	-0.064266
-0.0158874	-0.142861	-0.0374463
-0.0468665	-0.106579	-0.0362505
-0.00221798	-0.08918	-0.0332696
0.0504137	-0.109791	-0.053626
0.0723151	-0.114336	-0.075325
0.0766546	-0.0772718	-0.0768611
0.0583288	-0.0161452	-0.125771
0.0576377	0.0413383	-0.224211
0.0999412	0.0590771	-0.269729
0.147781	0.0207998	-0.243414
0.128085	-0.0217126	-0.223262
0.0706117	-0.00678302	-0.228383
0.0321136	0.0468096	-0.237321
0.0155386	0.0719838	-0.266728
0.025649	0.054636	-0.284159
0.0509997	0.0228168	-0.224236
0.0700601	-0.0015735	-0.151244
0.079546	0.00746172	-0.166862
0.133744	0.0413495	-0.226686
0.214898	0.0439571	-0.244842
0.240601	0.00693294	-0.245163
0.171815	-0.0129787	-0.25463
0.0511568	0.00644013	-0.25835
-0.0374308	0.0364941	-0.275278
-0.064313	0.0673488	-0.300594
-0.0274584	0.090833	-0.262656
0.00725527	0.0907117	-0.16557
-0.00999873	0.0836592	-0.120717
-0.0542494	0.0799172	-0.16272
-0.0569916	0.0622504	-0.215869
-0.0144701	0.0207725	-0.233161
0.00179077	-0.0144107	-0.204205
-0.0138038	-0.0345452	-0.118909
-0.0479999	-0.062743	-0.0440645
-0.0786521	-0.103309	-0.0827167
-0.0903643	-0.127916	-0.203251
-0.0643754	-0.118008	-0.279207
-0.0293511	-0.0697559	-0.291052
-0.0197524	0.0145602	-0.282657
-0.00420296	0.0873074	-0.264141
0.0325692	0.0907062	-0.265573
0.0749829	0.0357888	-0.315386
0.088165	-0.0206355	-0.345089
0.0790955	-0.0327851	-0.292322
0.0400587	0.0256126	-0.221899
-0.0180908	0.139835	-0.207368
-0.0400519	0.226471	-0.227181
-0.0242423	0.221078	-0.258878
-0.017775	0.153768	-0.302585
-0.0450271	0.079681	-0.315133
-0.0600556	0.00276352	-0.279114
-0.0641954	-0.0967912	-0.269637
-0.0656592	-0.185477	-0.308575
-0.0455172	-0.210341	-0.318172
-0.015259	-0.15854	-0.290062
0.00696786	-0.0728491	-0.288308
0.0338151	-0.0299949	-0.308797
0.0622887	-0.0964462	-0.315235
0.00822149	-0.23002	-0.339551
-0.109328	-0.298714	-0.369686
-0.169752	-0.246122	-0.342684
-0.114262	-0.148316	-0.289281
-0.00665675	-0.0875548	-0.28052
0.0965843	-0.0774795	-0.285769
0.17723	-0.0941816	-0.261464
0.196295	-0.0958094	-0.259725
0.183847	-0.0582142	-0.30041
0.188733	-0.0228102	-0.324483
0.206801	-0.0423554	-0.334817
0.194196	-0.0960603	-0.36648
0.156748	-0.117713	-0.383147
0.0982399	-0.087986	-0.368149
0.01182	-0.0365182	-0.389109
-0.0406593	0.00700305	-0.44602
-0.0243402	0.0198896	-0.464971
0.0242112	-0.00708335	-0.446561
0.0480407	-0.0328212	-0.415249
0.0660968	-0.0257226	-0.339499
0.083994	-0.020659	-0.250411
0.0801857	-0.0384003	-0.240782
0.0546166	-0.0547091	-0.280087
0.00761122	-0.051715	-0.275991
-0.0400942	-0.0440776	-0.251852
-0.0701802	-0.045455	-0.260616
-0.0364058	-0.0862609	-0.27052
0.0281371	-0.151566	-0.263898
0.0565606	-0.155174	-0.268331
0.0305928	-0.0633497	-0.263704
-0.0115511	0.0437353	-0.220618
-0.0252148	0.0741339	-0.193491
-0.0122478	0.0174527	-0.212966
0.0319202	-0.0745692	-0.219238
0.0660785	-0.135844	-0.197059
0.065161	-0.126539	-0.208045
0.0559609	-0.0727314	-0.26104
0.0820658	-0.037772	-0.321283
0.117588	-0.0408081	-0.383431
0.0936421	-0.0276678	-0.413397
0.0232644	0.0358878	-0.36507
-0.0537926	0.12293	-0.313723
-0.0936978	0.200839	-0.362056
-0.0895496	0.236242	-0.463486
-0.0679114	0.197038	-0.516279
-0.09725	0.099777	-0.520496
-0.182982	0.00527179	-0.50976
-0.216383	-0.0686882	-0.482298
-0.147519	-0.1211	-0.46654
-0.0305722	-0.128595	-0.481265
0.0424804	-0.0984123	-0.469891
0.0333006	-0.0847962	-0.402158
-0.0645109	-0.110919	-0.359291
-0.165717	-0.13339	-0.378723
-0.17306	-0.109419	-0.404068
-0.115614	-0.0449171	-0.427549
-0.0817691	0.0375938	-0.476134
-0.0889465	0.103113	-0.511468
-0.0876747	0.0978996	-0.516321
-0.0800749	0.013178	-0.549535
-0.0746495	-0.0687588	-0.589918
-0.0874156	-0.085536	-0.544921
-0.13518	-0.048171	-0.448939
-0.182822	0.0147024	-0.398134
-0.159492	0.0750799	-0.390039
-0.0631777	0.103773	-0.392607
-0.00831545	0.120758	-0.420246
-0.0314893	0.15432	-0.437564
-0.0824833	0.164406	-0.394447
-0.108001	0.105042	-0.355217
-0.0929226	0.0124259	-0.381398
-0.0348008	-0.0393662	-0.409249
0.0251803	-0.0161512	-0.384362
0.0224046	0.070682	-0.348132
-0.0110261	0.172649	-0.315596
-0.0351644	0.224793	-0.282929
-0.0439137	0.183097	-0.311651
-0.051965	0.0858911	-0.41153
-0.0324458	-0.00520471	-0.473985
0.0124856	-0.0850837	-0.455791
0.0594913	-0.170482	-0.436295
0.121083	-0.248741	-0.449728
0.18079	-0.295519	-0.460272
0.199693	-0.279751	-0.458716
0.148666	-0.185832	-0.416463
0.0788149	-0.0622143	-0.299917
0.0243983	0.0202042	-0.184649
-0.0149328	0.0662886	-0.179491
-0.0356637	0.11106	-0.249307
-0.0464844	0.156043	-0.293455
-0.0662224	0.181204	-0.308326
-0.107847	0.172862	-0.328528
-0.12057	0.125123	-0.357989
-0.0923991	0.0653172	-0.42299
-0.0375146	0.046671	-0.51763
0.0311827	0.0692649	-0.546916
0.0960504	0.0612491	-0.472634
0.126526	-0.0275894	-0.397861
0.102514	-0.135926	-0.400715
0.0731971	-0.171054	-0.441166
0.0578094	-0.104708	-0.485085
0.0624266	0.0240763	-0.52057
0.0804065	0.12897	-0.509773
0.102132	0.135627	-0.454534
0.0850474	0.0721058	-0.418443
0.0159316	0.0368662	-0.398738
-0.0418289	0.0594831	-0.346956
-0.0755148	0.0895632	-0.301078
-0.103952	0.0966985	-0.320575
-0.127818	0.0742387	-0.361978
-0.12558	0.0325543	-0.382184
-0.115174	-0.00164651	-0.426288
-0.0848537	-0.00542719	-0.493866
-0.00507875	-0.00436375	-0.509196
0.0743362	-0.0209166	-0.472458
0.104967	-0.0183812	-0.429624
0.0987095	0.0315165	-0.371206
0.0934551	0.0691926	-0.316233
0.0658731	0.0408129	-0.335821
0.0199195	-0.00680622	-0.397949
-0.0269669	-0.012692	-0.4077
-0.0780065	0.0250371	-0.389335
-0.109249	0.0740894	-0.392335
-0.0856515	0.0739617	-0.38007
-0.0260415	-0.0217894	-0.35463
-0.0206834	-0.147816	-0.383457
-0.0623456	-0.195211	-0.439161
-0.095344	-0.148845	-0.44043
-0.0899266	-0.0676015	-0.408289
-0.0479033	0.00329174	-0.388032
0.0204713	0.0301294	-0.359359
0.0617288	0.00149998	-0.345783
0.0152849	-0.0384496	-0.402636
-0.0664908	-0.0405296	-0.477625
-0.122827	-0.0123823	-0.494369
-0.138562	0.0157674	-0.495443
-0.126301	0.0426839	-0.52086
-0.0712691	0.0851605	-0.533114
0.0194234	0.126632	-0.535387
0.104445	0.146009	-0.561389
0.169589	0.124413	-0.568315
0.18318	0.0685701	-0.525761
0.129622	0.0423817	-0.497978
0.0259458	0.109618	-0.511804
-0.0475877	0.223125	-0.516542
-0.0609252	0.275374	-0.511028
-0.0443174	0.246125	-0.533073
-0.0056083	0.191069	-0.565459
0.0342737	0.173032	-0.58486
0.0479257	0.218636	-0.607096
0.0280828	0.288092	-0.607901
0.026975	0.297067	-0.539395
0.0306725	0.221192	-0.457043
0.00174432	0.124268	-0.438603
-0.0447253	0.0590506	-0.455981
-0.0752823	0.024726	-0.45635
-0.0801055	0.00783017	-0.451937
-0.075359	0.0067729	-0.437005
-0.0469712	0.0103695	-0.38528
-0.0195207	0.00303163	-0.342465
-0.0067271	0.00533659	-0.350846
0.00737594	0.0224448	-0.35656
0.0285412	0.0379886	-0.326354
0.0226001	0.049945	-0.306782
-0.0244789	0.0692243	-0.297888
-0.0655564	0.0725721	-0.251053
-0.108131	0.0384947	-0.197589
-0.151141	-0.0162901	-0.184959
-0.159008	-0.0728458	-0.180055
-0.122136	-0.118069	-0.170539
-0.0976091	-0.130391	-0.201891
-0.0917061	-0.104928	-0.244503
-0.0628089	-0.0806523	-0.223766
-0.0355748	-0.0927252	-0.17775
-0.0287338	-0.119804	-0.162244
-0.0292098	-0.128498	-0.146849
-0.0155337	-0.139706	-0.130468
-0.00685971	-0.180439	-0.163221
0.00872455	-0.219171	-0.207158
0.0211251	-0.226907	-0.201217
-0.0126891	-0.205345	-0.202332
-0.0610482	-0.14597	-0.257398
-0.0403709	-0.0736552	-0.307214
0.0651169	-0.0520503	-0.33295
0.150079	-0.0885778	-0.378
0.147666	-0.125012	-0.412418
0.0511387	-0.129205	-0.384016
-0.100563	-0.0898038	-0.331158
-0.220844	-0.0160806	-0.279196
-0.252331	0.0438064	-0.200106
-0.22934	0.0474354	-0.134744
-0.224454	0.0387915	-0.149928
-0.21133	0.0686898	-0.196912
-0.166263	0.122074	-0.209349
-0.102033	0.142536	-0.225242
-0.0522289	0.106	-0.264787
-0.0371327	0.029908	-0.287435
-0.0609625	-0.0468434	-0.304703
-0.0986435	-0.0787732	-0.341224
-0.066122	-0.0629898	-0.349492
0.0483454	-0.0426399	-0.31148
0.181035	-0.0309524	-0.292369
0.245546	-0.00891872	-0.306181
0.23175	0.00344061	-0.301074
0.162058	-0.0310956	-0.294595
0.0661071	-0.102735	-0.321273
0.00169515	-0.190048	-0.346865
-0.0239672	-0.273374	-0.353169
-0.0447813	-0.32054	-0.38342
-0.0793275	-0.32517	-0.425253
-0.0667088	-0.309544	-0.420322
0.013126	-0.279691	-0.381902
0.110062	-0.200302	-0.341107
0.164177	-0.0719476	-0.275848
0.123867	0.0557786	-0.207602
-0.00416389	0.120102	-0.205067
-0.15287	0.0983823	-0.248333
-0.210455	0.0101538	-0.260646
-0.177702	-0.0865192	-0.248771
-0.118947	-0.117893	-0.244186
-0.0600241	-0.0934065	-0.224684
-0.00542118	-0.0969903	-0.209622
0.0221288	-0.148989	-0.258877
0.0171523	-0.183789	-0.345266
0.0113157	-0.166011	-0.398426
-0.0283072	-0.115386	-0.433274
-0.0907879	-0.059643	-0.460027
-0.100628	-0.0484524	-0.430406
-0.0387375	-0.10811	-0.366782
0.0197359	-0.176736	-0.352898
0.0414963	-0.167324	-0.368991
0.0455154	-0.0747842	-0.343007
0.0127791	0.0374098	-0.303357
-0.0349636	0.109715	-0.288059
-0.0661721	0.112512	-0.265068
-0.0895246	0.0623712	-0.254908
-0.138979	0.0153778	-0.308851
-0.181742	0.0114771	-0.37745
-0.178894	0.00660911	-0.399169
-0.148502	-0.0458148	-0.420452
-0.0861004	-0.110129	-0.452817
0.00492542	-0.135819	-0.432009
0.0895243	-0.139473	-0.374207
0.128038	-0.141425	-0.346404
0.166364	-0.153896	-0.330161
0.215528	-0.185482	-0.30452
0.219587	-0.207748	-0.328398
0.165558	-0.188777	-0.401531
0.0892852	-0.169422	-0.443961
0.0281842	-0.212684	-0.444815
-0.0158745	-0.30089	-0.446657
-0.0261666	-0.36171	-0.432406
-0.0421884	-0.351959	-0.391936
-0.09138	-0.274903	-0.367624
-0.143728	-0.175634	-0.349536
-0.157677	-0.107955	-0.302679
-0.135783	-0.0924304	-0.282542
-0.121556	-0.0940217	-0.329274
-0.0970612	-0.0854482	-0.36805
-0.0465818	-0.0827312	-0.344623
0.0234163	-0.0827591	-0.310641
0.0877945	-0.0681342	-0.299253
0.13491	-0.0433221	-0.300877
0.14505	-0.0290451	-0.338201
0.109183	-0.0133491	-0.401104
0.0862692	0.0103366	-0.411474
0.0902219	0.0545939	-0.358538
0.0924465	0.135686	-0.317787
0.0671962	0.219091	-0.30647
0.0404729	0.221392	-0.289861
0.0147312	0.112658	-0.285189
-0.0151357	-0.0393252	-0.293508
-0.024103	-0.150687	-0.254798
-0.01653	-0.184501	-0.178681
-0.00621167	-0.149452	-0.140043
0.000297669	-0.0870863	-0.135255
0.0362338	-0.0397978	-0.11854
0.0890465	-0.00575362	-0.125479
0.140973	0.0782016	-0.1776
0.189966	0.225362	-0.223576
0.191077	0.355343	-0.248104
0.0948886	0.396384	-0.275506
-0.0572943	0.346352	-0.26713
-0.152186	0.227278	-0.192523
-0.174721	0.0803396	-0.129204
-0.150606	-0.0275348	-0.122683
-0.0953685	-0.0770094	-0.120371
-0.0413884	-0.0970148	-0.119502
-0.0228147	-0.0982853	-0.156027
-0.0244779	-0.0721399	-0.186207
-0.0158977	-0.0348478	-0.173522
-0.0247331	0.00170039	-0.193845
-0.0325979	0.0418968	-0.269083
-0.0183011	0.0691176	-0.311617
-0.00727984	0.0568335	-0.305204
-0.0420311	0.0347235	-0.299901
-0.0864289	0.0395287	-0.283246
-0.0883584	0.0433642	-0.245313
-0.0730501	0.0109565	-0.242848
-0.0517948	-0.0254663	-0.267545
-0.0253806	-0.03336	-0.258708
-0.00712948	-0.0177176	-0.240853
-0.0202706	0.0147403	-0.248158
-0.0145079	0.0492978	-0.21987
0.0289863	0.0537613	-0.143712
0.0643607	0.0461386	-0.120878
0.0747632	0.061072	-0.181138
0.0570929	0.0880147	-0.246614
0.00926905	0.0895925	-0.285551
-0.0603607	0.061137	-0.294254
-0.086941	0.0199239	-0.246538
-0.0631883	-0.0122796	-0.182729
-0.0242132	-0.00937527	-0.197379
0.0188484	0.0257323	-0.273378
0.0611555	0.0690853	-0.322633
0.0955853	0.103496	-0.342123
0.103225	0.14504	-0.357359
0.12161	0.189704	-0.350188
0.148793	0.210006	-0.339295
0.151403	0.202422	-0.361924
0.11669	0.19398	-0.375547
0.0689359	0.189966	-0.335262
0.0174951	0.183049	-0.300628
-0.0388806	0.173763	-0.323213
-0.0435627	0.147775	-0.354319
0.00437233	0.0999002	-0.361332
0.06788	0.0703885	-0.356133
0.116391	0.0781112	-0.316031
0.148482	0.0977736	-0.224858
0.138415	0.101028	-0.148755
0.0831683	0.0895023	-0.121136
0.0396243	0.0700366	-0.104491
0.0176568	0.0608152	-0.114875
0.000479446	0.0793013	-0.193993
-0.0246143	0.0919108	-0.283866
-0.0373762	0.0345291	-0.316828
-0.0489742	-0.0948087	-0.325807
-0.058451	-0.192306	-0.333209
-0.0342123	-0.175077	-0.310433
0.00375519	-0.0861768	-0.29508
0.0184764	-0.0163099	-0.334326
0.0172529	-0.00539881	-0.367527
0.0489291	-0.0466491	-0.334401
0.0878071	-0.0813194	-0.293096
0.117872	-0.0473867	-0.284391
0.143627	0.0205911	-0.27256
0.15399	0.0303413	-0.269126
0.158188	-0.018616	-0.2914
0.188363	-0.0511706	-0.280726
0.233392	-0.0161738	-0.222711
0.212383	0.079618	-0.207731
0.136702	0.187925	-0.250239
0.0636305	0.230588	-0.276057
0.0151197	0.181139	-0.289999
-0.0164277	0.107399	-0.324842
-0.0106794	0.0821269	-0.334881
0.0424303	0.0725654	-0.31017
0.0961592	0.0247726	-0.319533
0.129444	-0.0422469	-0.351581
0.124902	-0.0848852	-0.326618
0.0658181	-0.0844866	-0.264195
-0.0472299	-0.0414032	-0.221089
-0.152023	-0.00261028	-0.185678
-0.213511	-0.031596	-0.159697
-0.243932	-0.102768	-0.17388
-0.217971	-0.152096	-0.180071
-0.13583	-0.166276	-0.128759
-0.0354302	-0.159224	-0.0796224
0.0258104	-0.126063	-0.0536932
0.0536509	-0.0761648	0.0413977
0.0550031	-0.018009	0.227874
0.0364147	0.0511713	0.412088
0.0150172	0.110352	0.542894
-0.0278289	0.123063	0.623751
-0.107386	0.106752	0.642742
-0.209792	0.139953	0.636835
-0.2368	0.284071	0.680358
-0.150563	0.49793	0.750271
-0.0146332	0.675451	0.776258
0.0834563	0.728543	0.780148
0.115098	0.680027	0.821018
0.107451	0.654128	0.889381
0.101567	0.751158	0.976846
0.157912	0.90027	1.09939
0.237653	0.945436	1.21575
0.278628	0.842562	1.28665
0.290139	0.672143	1.3676
0.31851	0.538016	1.4891
0.343197	0.476806	1.56954
0.308664	0.452462	1.57626
0.227758	0.417578	1.5809
0.123798	0.403287	1.60583
0.0522715	0.489775	1.63085
0.0672464	0.676013	1.68498
0.166789	0.843439	1.76437
0.249062	0.880424	1.79054
0.244515	0.804675	1.76119
0.194833	0.713702	1.75826
0.145251	0.672199	1.78593
0.135646	0.699171	1.81491
0.196455	0.763337	1.87435
0.307999	0.802609	1.95947
0.368452	0.810831	1.9939
0.362561	0.852476	1.98935
0.344264	0.923637	2.01933
0.315245	0.948005	2.04719
0.266722	0.892625	2.01349
0.216261	0.801765	1.97364
0.179514	0.739352	1.97342
0.146969	0.757594	1.9819
0.162185	0.834538	2.01786
0.225142	0.880147	2.11869
0.263455	0.861388	2.22158
0.237526	0.864273	2.292
0.193609	0.961367	2.39213
0.194594	1.08646	2.517
0.233655	1.121	2.57292
0.302263	1.03248	2.55593
0.354337	0.893169	2.53332
0.349978	0.813009	2.51395
0.314432	0.862144	2.50971
0.333321	0.979742	2.56378
0.410427	1.04384	2.63259
0.457871	1.04234	2.63585
0.446445	1.05644	2.62244
0.383079	1.1204	2.67624
0.312485	1.20237	2.75114
0.277327	1.23526	2.77498
0.299196	1.18204	2.75037
0.321622	1.08404	2.67533
0.294327	1.04268	2.56799
0.266062	1.0864	2.51762
0.294005	1.15628	2.54896
0.380928	1.17809	2.55619
0.451786	1.14052	2.49356
0.471352	1.08528	2.42755
0.439485	1.06031	2.38932
0.389126	1.08281	2.35923
0.366148	1.1049	2.34298
0.361652	1.06406	2.32098
0.326969	0.977562	2.24047
0.244489	0.928196	2.14337
0.196788	0.934519	2.13183
0.209031	0.946149	2.19023
0.244759	0.949144	2.22863
0.268845	0.961612	2.23292
0.259908	0.999562	2.21683
0.21815	1.06338	2.1603
0.190891	1.10918	2.09023
0.252484	1.07105	2.05228
0.354693	0.945026	1.99712
0.402249	0.832484	1.905
0.366877	0.814127	1.87584
0.307532	0.862223	1.9529
0.262353	0.881073	2.03866
0.236006	0.826391	2.06441
0.214339	0.720057	2.03316
0.13819	0.630436	1.92644
0.0195461	0.637191	1.78121
-0.051719	0.731053	1.71781
-0.0325941	0.791457	1.75265
-0.00389067	0.751498	1.78159
-0.00114888	0.664664	1.78343
0.00442001	0.60526	1.8179
0.0118426	0.610152	1.86054
0.0439028	0.68226	1.86767
0.124726	0.767318	1.84755
0.229429	0.80518	1.77619
0.289953	0.808714	1.64101
0.333332	0.810928	1.55685
0.397879	0.778375	1.61254
0.458409	0.668586	1.69855
0.482258	0.525708	1.69076
0.459749	0.440346	1.60879
0.393429	0.458516	1.51163
0.293082	0.554313	1.43741
0.236261	0.663537	1.44101
0.233296	0.723651	1.50529
0.223891	0.746556	1.51068
0.184211	0.793206	1.42905
0.176239	0.867153	1.36667
0.241519	0.896334	1.37133
0.334888	0.858018	1.40671
0.407199	0.789824	1.46151
0.391064	0.754461	1.51503
0.298846	0.800978	1.50655
0.229265	0.904297	1.45334
0.270239	0.949602	1.4224
0.372302	0.863299	1.38276
0.404121	0.707709	1.28671
0.336879	0.601557	1.20172
0.230568	0.603582	1.19591
0.18449	0.662579	1.23395
0.230384	0.674956	1.26945
0.339699	0.604403	1.28157
0.408553	0.524668	1.22289
0.374033	0.546254	1.11639
0.30798	0.665901	1.09645
0.292656	0.752399	1.21953
0.328614	0.707378	1.37772
0.344464	0.576044	1.4571
0.313335	0.470799	1.43021
0.224059	0.451926	1.29851
0.126817	0.503803	1.13174
0.0939397	0.527993	1.0504
0.111598	0.469472	1.05844
0.104746	0.399467	1.0519
0.0467205	0.418976	1.02453
0.016241	0.51198	1.04871
0.053841	0.583189	1.10062
0.145212	0.578738	1.12093
0.2491	0.521215	1.11662
0.32327	0.467103	1.08013
0.341954	0.45727	0.993309
0.338165	0.480478	0.929766
0.365645	0.482293	0.960577
0.379634	0.444822	1.01304
0.350293	0.451013	1.02357
0.31099	0.544731	1.04802
0.29749	0.631816	1.11042
0.290524	0.620197	1.16164
0.300137	0.537927	1.19798
0.31698	0.46131	1.22438
0.271625	0.448225	1.17602
0.182573	0.498775	1.07089
0.133267	0.521158	1.02377
0.161962	0.44803	1.03626
0.20863	0.34973	1.01123
0.236184	0.334887	0.944548
0.229712	0.396336	0.895259
0.190831	0.443831	0.877756
0.167249	0.399631	0.915469
0.189763	0.27681	1.01716
0.22639	0.168943	1.07189
0.209697	0.185232	0.989773
0.164674	0.322604	0.863267
0.136414	0.463768	0.814697
0.137371	0.519252	0.826024
0.163852	0.530494	0.848945
0.190981	0.567622	0.878124
0.179351	0.632448	0.882465
0.122675	0.675641	0.850761
0.118393	0.642639	0.843313
0.195325	0.545593	0.863826
0.287155	0.494239	0.826872
0.3174	0.551821	0.728303
0.287031	0.645208	0.655451
0.236536	0.668196	0.639615
0.189557	0.605332	0.672671
0.178864	0.512452	0.758732
0.180395	0.461055	0.834596
0.164841	0.472603	0.816607
0.139847	0.480176	0.751468
0.163846	0.422194	0.743214
0.22394	0.323876	0.771193
0.251081	0.296286	0.767574
0.240066	0.396426	0.740289
0.207462	0.555329	0.708172
0.17305	0.651442	0.66968
0.151124	0.642938	0.664252
0.158284	0.581275	0.707294
0.141058	0.545593	0.714731
0.078444	0.555615	0.645006
0.034915	0.529635	0.580731
0.0327379	0.399819	0.568674
0.0413	0.259082	0.569723
0.0409656	0.258936	0.575427
0.0598573	0.412095	0.594724
0.0831632	0.56762	0.587139
0.113187	0.581312	0.569475
0.168986	0.430156	0.611697
0.222877	0.227264	0.665657
0.216894	0.130435	0.625376
0.154751	0.195911	0.524711
0.100512	0.313519	0.475289
0.0713693	0.348316	0.487026
0.0938276	0.3104	0.535719
0.15574	0.292781	0.607152
0.172502	0.320765	0.627248
0.0859309	0.350229	0.554191
-0.0126616	0.33804	0.484848
-0.0129906	0.271324	0.497345
0.0620643	0.220389	0.522797
0.165695	0.266274	0.507928
0.257146	0.368524	0.491801
0.318617	0.401453	0.481622
0.355794	0.33343	0.471972
0.39193	0.232397	0.503955
0.390112	0.176645	0.56051
0.295486	0.193675	0.545317
0.165411	0.240747	0.471301
0.0870253	0.239387	0.456237
0.0867577	0.185479	0.519847
0.0991298	0.178981	0.589722
0.0914876	0.293105	0.629395
0.0573116	0.450352	0.619107
0.0216145	0.514927	0.544943
0.0328001	0.440068	0.488211
0.0879992	0.307822	0.532554
0.12609	0.236026	0.607258
0.0901343	0.276132	0.60676
0.0417236	0.347678	0.556917
0.0398605	0.343905	0.524586
0.0872616	0.289765	0.529157
0.14046	0.286625	0.582432
0.152394	0.377052	0.655216
0.112787	0.502663	0.645974
0.0505958	0.568195	0.547654
0.0396856	0.509382	0.487629
0.0702048	0.37766	0.514319
0.0725783	0.281811	0.539646
0.0110923	0.250957	0.510628
-0.0541809	0.209246	0.447453
-0.0656498	0.10727	0.367361
-0.0233664	0.0130373	0.318945
0.0745698	0.0375382	0.365291
0.168295	0.188808	0.446634
0.195725	0.367247	0.453777
0.162601	0.450861	0.415351
0.140365	0.405377	0.423724
0.124249	0.317	0.470504
0.0897775	0.312036	0.517329
0.0704355	0.382243	0.56049
0.072308	0.41045	0.553217
0.085187	0.346005	0.483836
0.110686	0.251941	0.456573
0.152893	0.214222	0.520703
0.156805	0.269514	0.559316
0.125357	0.37667	0.496254
0.119516	0.431743	0.392698
0.145549	0.382847	0.303676
0.16252	0.305118	0.24956
0.155462	0.308068	0.262108
0.141383	0.374231	0.309715
0.107567	0.393786	0.295658
0.0924177	0.317343	0.23792
0.11398	0.193965	0.246204
0.105692	0.104196	0.309722
0.01989	0.110509	0.344764
-0.0802971	0.181504	0.344903
-0.11586	0.216846	0.320417
-0.102732	0.193724	0.250725
-0.05043	0.203481	0.191501
0.00742628	0.285135	0.213284
0.0245693	0.383906	0.259753
0.000519282	0.43289	0.269203
0.00737317	0.411251	0.29957
0.0663361	0.348473	0.386597
0.117697	0.321522	0.456976
0.133575	0.349845	0.455611
0.107179	0.349824	0.383331
0.0642609	0.243919	0.243518
0.0308263	0.0941688	0.102443
0.0324074	0.0322649	0.0781273
0.0249803	0.104315	0.164729
-0.0330326	0.232664	0.241905
-0.0917834	0.29158	0.268942
-0.102197	0.227844	0.285888
-0.0804507	0.11626	0.284921
-0.0934972	0.0918212	0.252989
-0.137726	0.165062	0.214188
-0.185428	0.222234	0.146093
-0.204228	0.197393	0.0232471
-0.161123	0.135783	-0.06556
-0.071391	0.113233	-0.0232663
0.0140271	0.166339	0.100139
0.0474999	0.238155	0.203322
0.0650712	0.225397	0.254528
0.0831163	0.125093	0.241143
0.0927001	0.0772573	0.180074
0.0780822	0.168222	0.156186
0.0412542	0.320678	0.198954
-0.0120271	0.382572	0.219628
-0.0619394	0.301626	0.188036
-0.0584854	0.168233	0.190085
-0.0390855	0.118963	0.242299
-0.0607822	0.195271	0.282875
-0.116397	0.290148	0.293379
-0.143403	0.262661	0.27218
-0.137825	0.122966	0.192511
-0.129678	0.047085	0.108277
-0.116209	0.149541	0.10753
-0.108476	0.348946	0.147444
-0.0877309	0.480422	0.141772
-0.0189581	0.44654	0.117311
0.0900773	0.292916	0.117132
0.145256	0.184479	0.110691
0.106864	0.23212	0.11461
0.0336616	0.349822	0.176903
-0.0281365	0.373569	0.225989
-0.0494613	0.29107	0.190365
-0.0117145	0.230631	0.148555
0.0673447	0.277427	0.174522
0.103181	0.376981	0.219695
0.0984189	0.425626	0.249363
0.108261	0.361101	0.28001
0.141463	0.22179	0.278927
0.18344	0.113662	0.240634
0.230076	0.0818926	0.227569
0.254432	0.0470656	0.229978
0.205179	-0.0344788	0.17678
0.121779	-0.0900981	0.1146
0.051312	-0.0379075	0.14232
0.00381795	0.114101	0.22995
-0.0257084	0.283679	0.297716
-0.0304488	0.354386	0.334782
-0.0415353	0.291298	0.321676
-0.107258	0.215439	0.23603
-0.184957	0.255945	0.142826
-0.224928	0.384305	0.102038
-0.202123	0.454788	0.0630292
-0.125322	0.382611	-0.00252833
-0.0104918	0.21975	-0.0288515
0.0704387	0.0931879	0.013186
0.0456863	0.0856613	0.0888917
-0.0333609	0.153736	0.19255
-0.0925944	0.181612	0.303812
-0.0987077	0.143692	0.342145
-0.0854427	0.125924	0.305507
-0.0550382	0.192037	0.284258
-0.00891358	0.286879	0.28561
0.0549879	0.329614	0.242416
0.138873	0.273358	0.15883
0.202455	0.155686	0.0774044
0.203909	0.0777113	0.00834101
0.14195	0.090978	-0.0141235
0.0942716	0.117245	0.0374906
0.0839613	0.0695744	0.0726193
0.0917632	-0.0178494	0.011855
0.103901	-0.0469939	-0.0657286
0.109245	0.0237098	-0.0524633
0.0897741	0.137456	0.0383307
0.0573515	0.195866	0.155755
0.0794831	0.15631	0.264175
0.134434	0.0850377	0.300915
0.155903	0.10088	0.260649
0.126848	0.221528	0.239374
0.0839326	0.326155	0.262484
0.0553453	0.317432	0.241325
0.0591619	0.234572	0.159513
0.0963358	0.171218	0.0834429
0.0840739	0.175629	0.0162124
0.00514399	0.257204	-0.0489136
-0.0556709	0.349335	-0.0659122
-0.0168753	0.363653	-0.0524261
0.0810936	0.307072	-0.0833232
0.172589	0.267196	-0.129756
0.208781	0.260732	-0.108523
0.146289	0.237225	-0.0511118
0.0329901	0.180778	-0.0141259
-0.0341397	0.146761	0.0199329
-0.0147337	0.199191	0.0559129
0.0282606	0.352766	0.0664685
0.0728942	0.513379	0.0831482
0.124501	0.525879	0.127988
0.17048	0.353032	0.122333
0.215657	0.158449	0.0406154
0.253882	0.0964928	-0.0181547
0.245159	0.134524	-0.00783543
0.165079	0.151988	0.0176004
0.10468	0.105104	0.0356768
0.122218	0.0479156	0.0439942
0.174114	0.0779541	0.00190319
0.196629	0.215088	-0.0648557
0.185085	0.322965	-0.0713525
0.177248	0.271482	-0.0342094
0.190586	0.125611	-0.0418286
0.244801	0.0521732	-0.0834807
0.277928	0.121654	-0.0937478
0.227825	0.275224	-0.076131
0.109803	0.385825	-0.0421627
0.0164901	0.385661	0.0128289
-0.0162271	0.32467	0.0301864
-0.0333677	0.319999	-0.0342277
-0.038993	0.390029	-0.0962076
-0.0169964	0.441906	-0.0825245
0.0566081	0.393609	-0.0466446
0.162326	0.273959	-0.0317429
0.266564	0.170183	-0.0105591
0.304615	0.131841	0.004718
0.245334	0.13245	0.00764964
0.157614	0.0950385	0.0527539
0.107027	-0.00120114	0.132162
0.0994348	-0.0602656	0.144831
0.0940968	0.000609241	0.0690189
0.0959017	0.121089	-0.0142632
0.0940695	0.17131	-0.0681501
0.0859534	0.109661	-0.0881251
0.111972	-0.00771277	-0.0483461
0.165595	-0.0848518	0.0102216
0.177028	-0.0606146	0.012419
0.105707	0.0294462	-0.00472139
0.0320806	0.0877178	0.0286536
0.00416885	0.0559533	0.0554406
0.0237679	0.00707401	0.0117137
0.0682212	0.0393553	-0.0499852
0.091441	0.148452	-0.0898951
0.0624714	0.238551	-0.128086
0.0385312	0.233777	-0.143826
0.100639	0.125546	-0.118025
0.184309	-0.00114547	-0.121367
0.202611	-0.0302673	-0.169327
0.151368	0.0279006	-0.173972
0.0857086	0.0414673	-0.124233
0.0434691	-0.0322988	-0.108488
0.0585708	-0.103597	-0.144919
0.109883	-0.0947567	-0.182203
0.103704	-0.0333422	-0.206875
0.0474663	0.00209819	-0.188985
0.027639	-0.0402345	-0.0914691
0.0716008	-0.117063	0.0097867
0.109115	-0.120238	0.0212797
0.110165	-0.00833086	-0.00335479
0.078391	0.1155	0.0284497
0.0213558	0.136191	0.0844443
0.00351003	0.0733436	0.112262
0.0558675	0.01865	0.118236
0.125532	0.00866913	0.080066
0.124957	0.0212045	-0.0143725
0.0783415	0.0123029	-0.0838266
0.042319	-0.0513336	-0.0738761
0.0496236	-0.115227	-0.0481783
0.096246	-0.0870446	-0.0457356
0.133435	0.030273	-0.0356566
0.115263	0.129134	-0.0339114
0.0470967	0.150522	-0.0728242
0.0281353	0.112099	-0.105516
0.0833718	0.0812425	-0.104761
0.13528	0.106082	-0.130411
0.106693	0.147392	-0.18688
0.011836	0.118173	-0.203654
-0.0748853	0.0118474	-0.186462
-0.101538	-0.0731525	-0.187149
-0.047924	-0.0589905	-0.191897
0.00990426	0.0235668	-0.17736
-0.00252571	0.0916952	-0.158849
-0.0733865	0.090725	-0.110766
-0.105493	0.0448245	-0.014579
-0.0546534	0.025975	0.0446984
0.0233799	0.0846812	0.0132495
0.0841228	0.167976	-0.0305448
0.105148	0.176571	-0.0381483
0.10414	0.114767	-0.0550067
0.0983179	0.0830272	-0.084847
0.10575	0.147666	-0.0891212
0.071353	0.265017	-0.0929767
-0.0338377	0.341262	-0.109599
-0.124077	0.296813	-0.0862754
-0.119893	0.160191	-0.0349594
-0.0362933	0.054907	-0.02206
0.0494151	0.0627533	-0.0296218
0.0978165	0.123433	-0.0125253
0.079731	0.137139	-0.0191639
0.0362452	0.107001	-0.066418
0.0424417	0.110524	-0.0789086
0.0806724	0.182093	-0.0484791
0.0632903	0.290439	-0.0393518
-0.0276882	0.360705	-0.0474437
-0.0996547	0.339458	-0.0457366
-0.104994	0.266249	-0.0763568
-0.0331394	0.248474	-0.13133
0.0886191	0.292481	-0.143659
0.183284	0.299805	-0.133001
0.186435	0.219177	-0.149938
0.146732	0.101008	-0.150719
0.145661	0.0150678	-0.102057
0.149216	0.00933455	-0.0818245
0.123754	0.0794493	-0.127496
0.0702847	0.152475	-0.183481
0.0108148	0.161092	-0.232486
-0.0262107	0.130356	-0.281144
0.0104808	0.137074	-0.280639
0.0856572	0.190689	-0.218048
0.0933569	0.249784	-0.174225
0.0324193	0.292156	-0.173076
-0.0202922	0.34208	-0.167334
-0.00976121	0.419667	-0.172339
0.0379741	0.524098	-0.22438
0.0854444	0.587903	-0.274583
0.0723512	0.53288	-0.283925
-0.0169178	0.380305	-0.281766
-0.0865303	0.24049	-0.259859
-0.0540859	0.172746	-0.1938
0.0450888	0.148511	-0.150917
0.0948749	0.121301	-0.181847
0.0754615	0.0723652	-0.218638
0.032339	0.0250993	-0.205161
0.0281561	0.0432873	-0.182249
0.0861386	0.135885	-0.17284
0.151476	0.240357	-0.167825
0.15839	0.288946	-0.197128
0.107032	0.285712	-0.25055
0.0982979	0.279456	-0.247769
0.147585	0.299544	-0.188381
0.179373	0.3275	-0.152139
0.120254	0.29993	-0.135642
0.00130851	0.186861	-0.0847444
-0.096196	0.0559577	-0.028396
-0.114322	0.0406261	-0.00766725
-0.0247087	0.166357	0.00121706
0.0971251	0.32047	-0.0126214
0.162211	0.399045	-0.0758905
0.158628	0.406755	-0.13317
0.153727	0.398299	-0.133033
0.156545	0.410945	-0.128972
0.130169	0.420319	-0.146343
0.0798018	0.359329	-0.131238
0.0103651	0.216067	-0.0930772
-0.0423846	0.0958228	-0.0903801
-0.0273698	0.0897724	-0.105368
0.0671544	0.159173	-0.109436
0.143708	0.185159	-0.147658
0.134584	0.133813	-0.212261
0.081023	0.0630131	-0.224789
0.0343945	0.0480654	-0.190266
0.00958475	0.115484	-0.157538
-0.016629	0.204939	-0.102713
-0.0675027	0.200696	-0.0141913
-0.16609	0.0862775	0.0355378
-0.228316	-0.0156869	0.0321181
-0.160126	-0.018864	0.031811
-0.000625338	0.0447563	0.0159215
0.119324	0.115962	-0.0478893
0.146272	0.155703	-0.103155
0.118856	0.14146	-0.11592
0.0728719	0.115259	-0.151579
0.0674849	0.133116	-0.223346
0.0973589	0.175574	-0.268982
0.0872051	0.179951	-0.289224
0.00209913	0.149063	-0.30267
-0.0807372	0.131449	-0.253005
-0.0914879	0.154459	-0.127157
-0.0538792	0.206063	-0.0083508
0.00485268	0.249327	0.0729163
0.0498742	0.232366	0.144793
0.0714287	0.16346	0.174298
0.0804775	0.113132	0.144966
0.115488	0.111499	0.121006
0.148922	0.0939108	0.116321
0.110032	0.0269742	0.0682478
0.0205442	-0.0460235	-0.0126674
-0.0410247	-0.0525218	-0.0678262
-0.00247027	0.0338308	-0.109567
0.120585	0.162692	-0.148667
0.27599	0.223759	-0.139727
0.362899	0.166923	-0.0969668
0.339097	0.0797484	-0.0945673
0.275214	0.0529502	-0.124482
0.247374	0.0758519	-0.138535
0.252973	0.0680236	-0.158887
0.227915	-0.0193906	-0.192216
0.169618	-0.161065	-0.182021
0.0976876	-0.261145	-0.13982
0.0464703	-0.241349	-0.126193
0.0436216	-0.139908	-0.127148
0.0745642	-0.0756389	-0.110922
0.0760653	-0.107846	-0.113434
0.00825042	-0.180882	-0.124592
-0.0543138	-0.206969	-0.0827698
-0.0663171	-0.175406	-0.0308635
-0.0508632	-0.124022	-0.055594
-0.0522822	-0.0902251	-0.12981
-0.0756831	-0.0593561	-0.185135
-0.114649	0.0227179	-0.218985
-0.134613	0.182509	-0.215589
-0.0795548	0.325317	-0.147264
-0.002474	0.334132	-0.0780679
0.031593	0.223787	-0.069723
0.0359135	0.111451	-0.0762371
0.0781222	0.0717148	-0.0601936
0.147335	0.0874387	-0.0616028
0.20907	0.0990963	-0.0691771
0.241011	0.0569906	-0.0308513
0.206825	-0.0213387	0.0037996
0.131236	-0.0429592	-0.0290923
0.091808	0.0378725	-0.0861548
0.125326	0.135698	-0.118417
0.165476	0.157574	-0.149508
0.183107	0.118248	-0.165642
0.192342	0.0730534	-0.135038
0.18722	0.0504894	-0.117379
0.1795	0.0665986	-0.154154
0.191932	0.0881021	-0.177884
0.199621	0.061933	-0.158168
0.138224	0.00400525	-0.15523
0.052123	-0.0158163	-0.172189
0.00795818	0.00220043	-0.163719
0.0138933	0.00139562	-0.164087
0.0404893	-0.0446366	-0.19521
0.0603806	-0.0940195	-0.192124
0.0522357	-0.0884216	-0.137184
0.00848756	0.0107807	-0.0924718
-0.0075992	0.14669	-0.0648157
0.025024	0.18965	-0.0272811
0.0743783	0.0811222	-0.0185108
0.0786782	-0.0688548	-0.0492302
0.0323447	-0.126462	-0.0673813
-0.0329626	-0.087954	-0.0859352
-0.0834055	-0.036204	-0.161616
-0.0807938	-0.0527122	-0.247603
-0.05624	-0.140375	-0.27193
-0.0571728	-0.20641	-0.270564
-0.0880743	-0.168028	-0.281827
-0.0723373	-0.0707763	-0.2642
-3.57948e-05	-0.00757279	-0.208414
0.0501863	0.0192512	-0.150238
0.0439209	0.0626362	-0.0840594
0.0120488	0.139051	-0.0160346
0.0223592	0.212341	-0.0119504
0.0911527	0.22034	-0.0638214
0.203853	0.151264	-0.0919574
0.281321	0.0757288	-0.107182
0.268552	0.0997181	-0.160805
0.202925	0.228667	-0.212216
0.143327	0.369414	-0.220237
0.086943	0.433029	-0.220401
-0.00661921	0.420423	-0.213296
-0.100777	0.373411	-0.16204
-0.168414	0.325619	-0.116752
-0.184826	0.284243	-0.136946
-0.130568	0.210947	-0.174681
-0.0314806	0.0737363	-0.183776
0.024197	-0.0558777	-0.190021
0.00594635	-0.0544724	-0.188222
-0.0195474	0.0916926	-0.15129
-0.038858	0.260326	-0.137458
-0.0687426	0.347543	-0.179688
-0.106198	0.345058	-0.202994
-0.135572	0.3045	-0.170829
-0.162509	0.285599	-0.145335
-0.160057	0.302034	-0.142022
-0.0945305	0.298601	-0.132768
-0.0248215	0.238843	-0.147602
0.00741534	0.186018	-0.182395
0.0205368	0.193416	-0.162056
0.0443235	0.21855	-0.0965388
0.0617322	0.199314	-0.0794021
0.101319	0.134415	-0.111717
0.177905	0.0453756	-0.119907
0.227781	-0.0121773	-0.110088
0.222666	0.0203187	-0.10871
0.194358	0.116864	-0.0946779
0.176548	0.171424	-0.0817014
0.147006	0.152621	-0.104497
0.118422	0.121795	-0.116559
0.0794037	0.128676	-0.0748348
0.00936053	0.149745	-0.0551349
-0.0629432	0.122593	-0.106985
-0.0932934	-0.00563131	-0.169128
-0.094871	-0.198857	-0.212292
-0.122265	-0.311674	-0.266213
-0.152506	-0.227455	-0.304119
-0.161961	0.00469646	-0.300333
-0.153539	0.234091	-0.302867
-0.143822	0.355574	-0.315122
-0.141908	0.361939	-0.28067
-0.160472	0.308018	-0.224774
-0.201359	0.257062	-0.211654
-0.198555	0.206599	-0.210379
-0.137583	0.114202	-0.172266
-0.0657256	0.00459148	-0.130348
-0.0492879	-0.0582152	-0.103762
-0.0882393	-0.0576395	-0.077667
-0.158958	-0.0402135	-0.100423
-0.236462	-0.0334561	-0.211259
-0.268886	-0.046533	-0.335829
-0.255854	-0.0526501	-0.402415
-0.22875	-0.0193395	-0.43382
-0.21217	0.0299388	-0.445737
-0.156029	0.0120216	-0.428046
-0.0485801	-0.103748	-0.426346
0.0662652	-0.230668	-0.455383
0.146789	-0.258727	-0.432151
0.163387	-0.181013	-0.329509
0.120168	-0.0875129	-0.224491
0.0555343	-0.0605961	-0.151772
0.0271121	-0.0917309	-0.0908829
-0.00821937	-0.101835	-0.0819682
-0.100728	-0.0211749	-0.141908
-0.195682	0.100357	-0.20091
-0.206931	0.141267	-0.239649
-0.127591	0.0681878	-0.304906
-0.0208848	-0.0301019	-0.359282
0.0656594	-0.0716526	-0.326122
0.0768007	-0.0522066	-0.24987
0.0383379	0.00503741	-0.208955
0.0208476	0.0527945	-0.205702
0.0414221	0.0683144	-0.234954
0.048148	0.0941403	-0.289908
0.0308205	0.180064	-0.29877
0.0230727	0.272766	-0.224248
0.00402364	0.282291	-0.166317
-0.0225292	0.21084	-0.193356
-0.0322686	0.130673	-0.242918
-0.0276279	0.0800488	-0.263353
-0.0562123	0.0650991	-0.259729
-0.0972558	0.055627	-0.222708
-0.100036	-0.000792402	-0.171168
-0.0589222	-0.0946441	-0.179128
0.0276688	-0.134519	-0.224802
0.129748	-0.0897835	-0.202777
0.183716	-0.0340356	-0.125546
0.15486	-0.0276751	-0.0957938
0.127423	-0.0550599	-0.111506
0.163895	-0.0665064	-0.113926
0.221741	-0.00991452	-0.106642
0.235424	0.110151	-0.0856084
0.169866	0.20685	-0.0316293
0.0531846	0.203257	-0.00957733
-0.0636158	0.133966	-0.0737438
-0.0953737	0.0920954	-0.144816
-0.0382471	0.12544	-0.142343
0.0487254	0.224745	-0.107761
0.120818	0.324372	-0.0851556
0.174638	0.351935	-0.070246
0.195048	0.287198	-0.0872669
0.148097	0.191115	-0.139465
0.0788375	0.0959078	-0.161336
0.0155936	-0.010566	-0.144437
-0.0309081	-0.116095	-0.165196
-0.0441535	-0.176533	-0.213806
-0.00918097	-0.171736	-0.200397
0.0199761	-0.120847	-0.127565
-0.00794275	-0.0715933	-0.0635661
-0.0415252	-0.0754484	-0.0304998
-0.0372196	-0.12722	-0.0530739
0.000479278	-0.152484	-0.149085
0.0376311	-0.0979482	-0.240678
0.0717161	0.0152956	-0.239975
0.0836282	0.112213	-0.192224
0.0612023	0.149092	-0.16411
0.0476045	0.140751	-0.134705
0.0485067	0.137574	-0.0974169
0.0414911	0.174145	-0.0884551
0.0195934	0.225532	-0.0980619
0.024995	0.22411	-0.113803
0.0411268	0.149799	-0.183876
0.0587124	0.0849389	-0.300843
0.116891	0.0921573	-0.368914
0.207117	0.132153	-0.359716
0.271912	0.143935	-0.324158
0.281247	0.13369	-0.28028
0.261081	0.125632	-0.244339
0.20471	0.129203	-0.271099
0.140344	0.143991	-0.323559
0.107678	0.139838	-0.289053
0.098464	0.0808615	-0.187464
0.0901487	0.0201404	-0.139182
0.108035	0.0349184	-0.157512
0.156927	0.11004	-0.172843
0.153191	0.16454	-0.186219
0.0804376	0.166192	-0.212607
0.00225785	0.117167	-0.239859
-0.022652	0.0478468	-0.297667
0.00971216	0.023161	-0.393737
0.0840828	0.0706575	-0.430843
0.157179	0.108554	-0.358192
0.175547	0.0722029	-0.272521
0.183278	0.005242	-0.237795
0.213232	-0.0259824	-0.207016
0.230445	-0.015618	-0.167477
0.175162	0.00834991	-0.140717
0.0803221	0.0060646	-0.0966394
0.00626213	-0.0449479	-0.0441955
-0.0155672	-0.096641	-0.0630702
0.0186422	-0.101319	-0.133259
0.0499597	-0.0843058	-0.149862
0.0234662	-0.0929169	-0.109298
-0.070092	-0.106566	-0.0712033
-0.146822	-0.0800913	-0.0418041
-0.165252	0.0141507	-0.0272745
-0.157052	0.15654	-0.0538803
-0.159828	0.26579	-0.0715354
-0.159198	0.239308	-0.0299642
-0.113393	0.0778785	0.000115279
-0.0313699	-0.0967402	-0.0444884
0.072451	-0.167016	-0.101572
0.142249	-0.125837	-0.115629
0.135482	-0.0415001	-0.113099
0.0747698	-0.00150161	-0.100739
0.0296022	-0.0370697	-0.0635747
0.0265663	-0.1027	-0.0415996
0.0284964	-0.132571	-0.0313226
0.0387651	-0.142208	0.0392882
0.0469867	-0.18841	0.141995
0.0464531	-0.264291	0.15998
0.0492517	-0.313226	0.0765436
0.0814582	-0.295006	-0.0351097
0.0975721	-0.214659	-0.131837
0.0431551	-0.104968	-0.164504
-0.0378016	-0.0220214	-0.0926344
-0.103749	0.00250585	-0.00141981
-0.148285	-0.0172852	-0.00267722
-0.174281	-0.0575917	-0.0618798
-0.160386	-0.119147	-0.0822947
-0.139298	-0.179312	-0.0641268
-0.126057	-0.166245	-0.0360999
-0.0876555	-0.0396005	-0.000976091
-0.0422972	0.152206	-0.00363731
-0.0330635	0.33371	-0.0639133
-0.0573282	0.431677	-0.10287
-0.0818439	0.400201	-0.0844055
-0.12104	0.276834	-0.102148
-0.140881	0.181533	-0.180066
-0.0927147	0.159345	-0.218192
-0.0223378	0.148455	-0.175662
-0.00487996	0.0937747	-0.0987216
-0.0365913	0.0163978	-0.0256445
-0.0608653	-0.0507663	-0.00639779
-0.0806152	-0.0745681	-0.0886822
-0.0765205	-0.042069	-0.193743
-0.0443791	-0.011682	-0.19762
-0.00871097	-0.0475013	-0.139842
0.0201187	-0.110613	-0.134106
0.070137	-0.11502	-0.176041
0.126528	-0.0534832	-0.198353
0.132075	0.0299708	-0.186761
0.119706	0.0985111	-0.133251
0.129587	0.122341	-0.0534071
0.152524	0.10386	-0.049333
0.151637	0.08979	-0.155071
0.128645	0.0770906	-0.240421
0.072501	0.0066619	-0.210611
-0.0277719	-0.137824	-0.131844
-0.115771	-0.280063	-0.0764414
-0.138323	-0.322766	-0.0591514
-0.0789151	-0.224313	-0.0953045
0.0113356	-0.0458908	-0.147059
0.0805658	0.0983237	-0.133481
0.0791676	0.147442	-0.0887039
0.016207	0.154171	-0.120972
-0.0144136	0.170197	-0.21554
0.0391081	0.180469	-0.268767
0.128924	0.142327	-0.262149
0.160012	0.0633421	-0.23099
0.148156	-0.0148257	-0.192298
0.129917	-0.0527383	-0.19131
0.114342	-0.0417075	-0.252224
0.0965735	-0.0331393	-0.292657
0.0756538	-0.0774662	-0.256574
0.0579993	-0.15856	-0.232478
0.053494	-0.219911	-0.285031
0.0940866	-0.240285	-0.352817
0.131005	-0.224566	-0.389729
0.102993	-0.169217	-0.396437
0.0188056	-0.0849963	-0.34685
-0.048286	-0.0145492	-0.252422
-0.0658304	0.0077069	-0.192665
-0.0500307	-0.00830827	-0.176191
-0.00989005	-0.0352732	-0.134438
-5.82808e-05	-0.0706092	-0.0811041
-0.0438304	-0.097344	-0.079604
-0.0874518	-0.0957989	-0.129568
-0.0650449	-0.0712518	-0.209439
-0.01516	-0.0452994	-0.315112
0.00868641	-0.0149243	-0.365184
0.021223	-0.000957396	-0.275594
0.0223752	-0.0291267	-0.135157
0.0296187	-0.0664893	-0.0861124
0.0685898	-0.067388	-0.120566
0.129434	-0.0572729	-0.156964
0.13114	-0.0571607	-0.175445
0.0771829	-0.0456894	-0.168756
0.035715	-0.0337786	-0.141982
0.0310475	-0.065414	-0.173792
0.0604305	-0.12994	-0.281683
0.114501	-0.189524	-0.352234
0.166106	-0.233298	-0.330904
0.16538	-0.231184	-0.29555
0.146027	-0.153305	-0.275859
0.138046	-0.0548591	-0.224597
0.114225	-0.0306805	-0.15995
0.0507147	-0.0858964	-0.116172
-0.0235652	-0.158154	-0.0727293
-0.0795701	-0.19941	-0.0507261
-0.121254	-0.183719	-0.103787
-0.10742	-0.121456	-0.176422
-0.0357528	-0.0823021	-0.184402
0.0439367	-0.0989057	-0.175693
0.0857865	-0.127367	-0.220008
0.101647	-0.118137	-0.290327
0.111916	-0.0765735	-0.353841
0.112148	-0.0183006	-0.397061
0.120427	0.0161703	-0.362527
0.10955	-0.0101084	-0.244735
0.0617762	-0.0758769	-0.164336
-0.00629552	-0.116809	-0.184153
-0.0307706	-0.108345	-0.221176
-0.0138315	-0.07752	-0.211529
-0.0169945	-0.0447362	-0.173819
-0.0497471	-0.0146224	-0.128962
-0.0853486	0.0141263	-0.114032
-0.0919371	0.0482654	-0.188327
-0.0680565	0.0857088	-0.295295
0.0108424	0.0979926	-0.301273
0.12296	0.0733112	-0.218412
0.213768	0.0527115	-0.173487
0.256906	0.0620915	-0.206855
0.247	0.0722568	-0.278246
0.191453	0.0624713	-0.346859
0.112349	0.0474257	-0.352687
0.0757418	0.0504828	-0.270638
0.0806657	0.072658	-0.200714
0.0944798	0.104926	-0.21755
0.112292	0.104749	-0.249968
0.127736	0.0521318	-0.229669
0.105928	-0.00535666	-0.205151
0.0446512	0.00972283	-0.217549
0.0199913	0.0800621	-0.246482
0.0362968	0.109654	-0.290317
0.0569372	0.0545113	-0.327342
0.0677703	-0.0419368	-0.290644
0.0725579	-0.118763	-0.201269
0.0421414	-0.122755	-0.176863
-0.0141535	-0.0355717	-0.231911
-0.0516302	0.0797394	-0.261037
-0.0869556	0.135527	-0.226371
-0.122289	0.132525	-0.154128
-0.132934	0.106863	-0.0655515
-0.11599	0.0614842	-0.0251504
-0.10825	0.0076526	-0.0887589
-0.0841322	-0.0132288	-0.167639
-0.0154617	0.00141866	-0.140461
0.0484672	0.0258997	-0.0573413
0.0802231	0.0597021	-0.0228697
0.0967973	0.0776263	-0.0399252
0.112811	0.030456	-0.0842664
0.0975443	-0.0626351	-0.156357
0.0660485	-0.111103	-0.208702
0.0380493	-0.0731319	-0.207265
0.0129628	0.0318675	-0.222028
0.00884253	0.146494	-0.278598
0.0330596	0.187134	-0.284776
0.0580523	0.0992217	-0.212304
0.0394765	-0.0391271	-0.144443
0.0160257	-0.106729	-0.114863
0.0041012	-0.0821256	-0.105057
-0.0150424	-0.0285424	-0.13232
-0.0543043	-0.00317384	-0.163292
-0.0881078	-0.0413195	-0.132347
-0.10011	-0.130166	-0.094209
-0.107448	-0.204777	-0.139284
-0.0931557	-0.233822	-0.217853
-0.065385	-0.241877	-0.238551
-0.0483794	-0.24541	-0.221833
-0.0660634	-0.245983	-0.210136
-0.0867433	-0.245855	-0.210691
-0.0792485	-0.239673	-0.254779
-0.0542254	-0.208391	-0.337666
-0.0147681	-0.153791	-0.358286
0.00411343	-0.0857703	-0.272504
-0.0309145	0.00227024	-0.181726
-0.109163	0.0994712	-0.164284
-0.138494	0.168011	-0.188419
-0.0874451	0.161759	-0.225985
-0.0056449	0.0844734	-0.25289
0.0788537	-0.0350232	-0.227585
0.146027	-0.148903	-0.195087
0.179952	-0.207159	-0.248744
0.173471	-0.195319	-0.347387
0.16443	-0.159249	-0.370494
0.128937	-0.137625	-0.320247
0.0543	-0.11033	-0.273673
-0.00245472	-0.0581187	-0.25382
0.00107211	-0.0202611	-0.257827
0.0380921	-0.0363945	-0.272372
0.0765008	-0.0934602	-0.232809
0.140747	-0.150521	-0.119873
0.204758	-0.177929	-0.0537842
0.247983	-0.149245	-0.123662
0.299535	-0.0973313	-0.250976
0.364399	-0.0953648	-0.336512
0.382085	-0.153069	-0.370621
0.330646	-0.199354	-0.352197
0.255658	-0.201623	-0.284314
0.172705	-0.177888	-0.23949
0.130168	-0.116801	-0.235321
0.166261	-0.0243424	-0.199348
0.233092	0.0591203	-0.141509
0.234088	0.125375	-0.157197
0.175795	0.178373	-0.247357
0.119844	0.16359	-0.341777
0.0648727	0.0562278	-0.424406
0.0240353	-0.0679063	-0.469028
0.00288703	-0.102279	-0.42857
-0.0140686	-0.0241545	-0.355966
-0.0455025	0.113784	-0.335774
-0.036207	0.212137	-0.326029
0.0229495	0.190011	-0.258041
0.0601513	0.0748906	-0.188766
0.0409396	-0.0125306	-0.178156
-0.00911406	-0.0220496	-0.202125
-0.0426755	-0.00645828	-0.25487
-0.0374535	-0.0118769	-0.330011
0.0308267	-0.0403237	-0.343682
0.116583	-0.0868368	-0.259785
0.159713	-0.115555	-0.175698
0.158118	-0.0961485	-0.147777
0.154672	-0.0558097	-0.136844
0.179383	-0.0288879	-0.142004
0.206073	-0.00264858	-0.183421
0.225226	0.0192054	-0.219653
0.205743	0.0102354	-0.230946
0.139488	-0.0261771	-0.255221
0.0554558	-0.0698707	-0.275776
0.00134244	-0.0897701	-0.247796
-0.0233884	-0.0561645	-0.220696
-0.0532106	0.0409757	-0.250671
-0.050176	0.14802	-0.292142
-0.000153982	0.203726	-0.299519
0.0588483	0.19812	-0.291344
0.0682611	0.170018	-0.256943
0.0449399	0.14192	-0.179179
0.0217262	0.106557	-0.136691
0.0242623	0.0525986	-0.183022
0.081095	-0.019352	-0.245702
0.145038	-0.0899148	-0.268685
0.140819	-0.11103	-0.283677
0.0594053	-0.0679382	-0.299444
-0.00577165	-0.0162436	-0.305233
-0.0129932	-0.0125646	-0.337953
0.0247813	-0.0206077	-0.387957
0.10064	0.0207771	-0.384902
0.169083	0.123907	-0.351628
0.182652	0.250785	-0.379796
0.147746	0.342123	-0.459939
0.122837	0.337087	-0.503297
0.0869088	0.239728	-0.491687
0.0245411	0.145689	-0.431471
-0.0252431	0.0980947	-0.313874
-0.0358009	0.038795	-0.207878
-0.00659076	-0.0573144	-0.196928
0.0631808	-0.125884	-0.233924
0.143894	-0.12043	-0.245389
0.139056	-0.0420936	-0.280731
0.0539793	0.081678	-0.373552
-0.0294471	0.174311	-0.45688
-0.0764351	0.15686	-0.499779
-0.133073	0.0611419	-0.507099
-0.203366	-0.0275149	-0.441679
-0.242698	-0.073155	-0.321713
-0.226342	-0.0758786	-0.266835
-0.133117	-0.0429426	-0.309796
0.0049182	-0.0197255	-0.362763
0.117332	-0.0318552	-0.399661
0.156333	-0.03441	-0.457545
0.158853	0.0154693	-0.513614
0.158	0.0679939	-0.532579
0.140637	0.0709298	-0.538035
0.116443	0.0434475	-0.516651
0.0802278	0.0304653	-0.443833
0.0148721	0.0538381	-0.398583
-0.0784656	0.105713	-0.444092
-0.122526	0.123075	-0.500645
-0.0878842	0.0494753	-0.499412
-0.0167762	-0.0600842	-0.486525
0.0564807	-0.102218	-0.484688
0.121163	-0.0476896	-0.469346
0.183777	0.0453743	-0.468657
0.236493	0.109007	-0.493673
0.291755	0.102055	-0.48658
0.301666	0.0620791	-0.4398
0.226128	0.0588359	-0.410781
0.0976282	0.0934491	-0.401357
0.00086956	0.0915944	-0.382584
-0.0192205	0.00573728	-0.392803
0.0044512	-0.12248	-0.450359
0.0511146	-0.208233	-0.485281
0.0890813	-0.206991	-0.477131
0.108589	-0.130709	-0.482667
0.119143	-0.0448707	-0.503399
0.134158	-0.0104939	-0.499659
0.11394	-0.026717	-0.492437
0.0227796	-0.0349862	-0.496147
-0.0633598	-0.0300447	-0.475997
-0.0785225	-0.0505461	-0.451073
-0.0252869	-0.0837256	-0.45504
0.0355091	-0.0789704	-0.439633
0.069074	-0.037327	-0.378335
0.0507647	-0.00814472	-0.349467
0.0117	-0.0203039	-0.388443
0.028711	-0.0789751	-0.422581
0.0859764	-0.166009	-0.414124
0.115078	-0.229978	-0.38554
0.0951729	-0.229089	-0.335199
0.0714804	-0.186659	-0.277147
0.0282515	-0.148152	-0.282293
-0.0388721	-0.114236	-0.344366
-0.089913	-0.0805863	-0.369719
-0.113015	-0.0741529	-0.356963
-0.12048	-0.0847532	-0.373614
-0.102281	-0.0837475	-0.402465
-0.0584333	-0.0832685	-0.394549
-0.0507356	-0.0863327	-0.369192
-0.07901	-0.0418242	-0.325748
-0.0990398	0.0385971	-0.250398
-0.0955702	0.0728551	-0.22236
-0.0675277	0.020023	-0.294211
-0.00810608	-0.0898907	-0.375814
0.040054	-0.220249	-0.391645
-0.00721922	-0.308117	-0.398452
-0.108962	-0.30951	-0.433503
-0.171806	-0.260601	-0.463752
-0.153211	-0.220709	-0.491874
-0.0928117	-0.192818	-0.515313
-0.0412771	-0.171835	-0.470842
-0.0479579	-0.178795	-0.362252
-0.123814	-0.202492	-0.289092
-0.182909	-0.206267	-0.264663
-0.1739	-0.176446	-0.229336
-0.120692	-0.121792	-0.212179
-0.0907823	-0.0479917	-0.256472
-0.0817101	0.00793138	-0.321301
-0.0711565	0.00215251	-0.389705
-0.0513647	-0.0570558	-0.479906
-0.0160753	-0.130875	-0.527054
0.0150008	-0.202805	-0.46907
0.0232771	-0.258706	-0.37689
0.0120674	-0.283106	-0.328857
0.0479801	-0.271684	-0.308515
0.131052	-0.223748	-0.304458
0.185862	-0.132878	-0.329933
0.161929	-0.0404715	-0.348402
0.0750327	-0.00409444	-0.336698
-0.0157957	-0.0456009	-0.343312
-0.0594825	-0.128024	-0.370725
-0.00161487	-0.197819	-0.353486
0.103726	-0.221129	-0.31086
0.161773	-0.198423	-0.316235
0.145849	-0.164361	-0.352976
0.108278	-0.163625	-0.370742
0.0723727	-0.203667	-0.38325
0.0142792	-0.228719	-0.387783
-0.0538342	-0.203838	-0.346185
-0.137369	-0.154609	-0.289372
-0.201672	-0.107109	-0.2588
-0.181032	-0.0662794	-0.219441
-0.067549	-0.037772	-0.160725
0.0191231	-0.023386	-0.154521
-0.000505571	-0.00627254	-0.209784
-0.0580746	0.0106917	-0.241603
-0.0799091	0.0172622	-0.221322
-0.0409335	0.0446971	-0.176843
0.0368803	0.106925	-0.109784
0.106565	0.153162	-0.0507275
0.123215	0.123749	-0.077934
0.136323	0.0410655	-0.171175
0.210515	-0.0529655	-0.224946
0.287266	-0.130281	-0.233411
0.288417	-0.151479	-0.243155
0.221015	-0.108685	-0.235102
0.150841	-0.0739589	-0.213778
0.0979505	-0.0814298	-0.247158
0.0935224	-0.0774208	-0.317356
0.131593	-0.0372118	-0.345237
0.159744	-0.00131479	-0.358127
0.15896	0.0142043	-0.411419
0.161072	0.00904452	-0.467797
0.174106	-0.0250573	-0.483396
0.147357	-0.0613514	-0.462513
0.0842917	-0.0742609	-0.377913
-0.00996235	-0.0972764	-0.227849
-0.120075	-0.152314	-0.127335
-0.198337	-0.194978	-0.144581
-0.185095	-0.195534	-0.192216
-0.100785	-0.169811	-0.207909
-0.0318468	-0.136818	-0.238616
-0.00107056	-0.123501	-0.289729
0.00297899	-0.166648	-0.32643
0.0109058	-0.241521	-0.371391
0.0275081	-0.27198	-0.415428
0.0507419	-0.209242	-0.401631
0.0539242	-0.086423	-0.366363
0.0191331	0.0264414	-0.387877
0.00304962	0.0561961	-0.429447
0.0393134	0.00342206	-0.423474
0.104044	-0.0519308	-0.391595
0.124844	-0.0409494	-0.35986
0.104224	0.0169568	-0.316043
0.0652373	0.0654494	-0.28934
0.0258308	0.0933564	-0.306525
0.0156209	0.113844	-0.314989
0.0332203	0.128388	-0.286656
0.0452374	0.111394	-0.287458
0.0247347	0.0306274	-0.341886
0.0307771	-0.109014	-0.386341
0.0790233	-0.249145	-0.40322
0.124907	-0.311569	-0.40847
0.129349	-0.284078	-0.370346
0.0875704	-0.22985	-0.293505
0.0183198	-0.201678	-0.260354
-0.0264301	-0.174038	-0.280165
0.0295201	-0.106157	-0.277838
0.136697	-0.0113988	-0.249984
0.202743	0.0919113	-0.240692
0.221865	0.178896	-0.247413
0.249688	0.21627	-0.275677
0.286242	0.197224	-0.350909
0.304208	0.160364	-0.419289
0.310019	0.106243	-0.40633
0.269092	0.0281008	-0.3628
0.183945	-0.0208873	-0.358129
0.0939588	0.00390375	-0.354414
0.0157389	0.0650917	-0.324548
-0.082931	0.103634	-0.315199
-0.149798	0.0877208	-0.315744
-0.103911	0.000172619	-0.279177
0.02437	-0.13703	-0.256485
0.16719	-0.225795	-0.285905
0.262894	-0.202332	-0.307106
0.256107	-0.111098	-0.310084
0.123684	-0.0296975	-0.356925
-0.0178222	0.00047657	-0.427558
-0.0458745	-0.0443056	-0.464231
0.0407306	-0.134902	-0.491958
0.162306	-0.174505	-0.519963
0.238672	-0.115506	-0.503223
0.241736	-0.0144365	-0.467936
0.195741	0.0661627	-0.477416
0.180891	0.108458	-0.48894
0.204312	0.100055	-0.432981
0.214789	0.0540481	-0.35729
0.195404	-0.00322357	-0.321331
0.170768	-0.0603875	-0.311343
0.160819	-0.117786	-0.330682
0.157809	-0.139601	-0.383137
0.185582	-0.117867	-0.397551
0.229081	-0.09342	-0.343957
0.259516	-0.0952407	-0.305963
0.253128	-0.0959267	-0.308825
0.228109	-0.0639614	-0.283843
0.192427	-0.000369931	-0.229526
0.131827	0.0706184	-0.201033
0.0761858	0.103825	-0.196627
0.0442702	0.0727503	-0.202347
0.0387602	0.0144874	-0.234373
0.0348815	-0.0248301	-0.263336
0.0319957	-0.0557727	-0.242949
0.0070762	-0.117046	-0.222663
-0.0489093	-0.197652	-0.26446
-0.0788995	-0.260056	-0.323906
-0.0510619	-0.278956	-0.334679
0.00879154	-0.242565	-0.301889
0.0388545	-0.17136	-0.239488
0.032983	-0.118873	-0.160835
-0.0151121	-0.126811	-0.145461
-0.0831382	-0.165474	-0.228957
-0.103037	-0.183887	-0.309737
-0.055103	-0.151918	-0.310251
0.00836585	-0.0703862	-0.274662
0.0335834	0.0332041	-0.245989
0.0604493	0.0956655	-0.2233
0.091711	0.0845925	-0.2411
0.106577	0.0486378	-0.299243
0.0988708	0.0263998	-0.32847
0.0688821	-0.00573899	-0.32399
0.0150096	-0.0471635	-0.346703
-0.0244235	-0.0603741	-0.3724
-0.00415895	-0.0428068	-0.329451
0.0132004	-0.0271725	-0.261181
-0.0207968	-0.00844828	-0.238981
-0.0737255	0.0149248	-0.248418
-0.0943991	0.0166857	-0.280748
-0.0863841	-0.0246886	-0.353124
-0.0499229	-0.098006	-0.400878
0.00732134	-0.186935	-0.361991
0.0358109	-0.247862	-0.30932
0.0493019	-0.223271	-0.297677
0.0994866	-0.146461	-0.273237
0.185498	-0.136511	-0.225772
0.24071	-0.237011	-0.205357
0.261417	-0.369083	-0.196377
0.271128	-0.462273	-0.176979
0.250963	-0.487495	-0.202897
0.201773	-0.443638	-0.264148
0.133862	-0.37439	-0.26716
[truncated: 1,501 more rows]

## Sheet: panel_B_fifty_pulses
0.0455414	0.08414	0.00806244
0.108599	0.086002	-0.0579634
0.145506	0.0594997	-0.0939545
0.2064	0.0138178	-0.11471
0.269647	-0.0545279	-0.126332
0.283065	-0.156421	-0.107517
0.242282	-0.241801	-0.0757959
0.159693	-0.246895	-0.0727491
0.058805	-0.163605	-0.0869749
0.00398488	-0.0445949	-0.109183
0.0310226	0.0339774	-0.165821
0.0792724	0.0223256	-0.230604
0.0946165	-0.0424319	-0.231411
0.089056	-0.0705355	-0.184083
0.0613522	-0.0282469	-0.15927
-0.00740242	0.0268314	-0.155261
-0.093644	0.0202772	-0.138253
-0.158859	-0.0609323	-0.113891
-0.186293	-0.157936	-0.0795718
-0.152357	-0.193999	-0.0271925
-0.0520587	-0.150978	-0.0091473
0.0437004	-0.0767605	-0.0619239
0.0566151	-0.0231587	-0.117206
-0.0131605	0.013976	-0.113987
-0.10928	0.0627115	-0.0709994
-0.182788	0.122799	-0.0159979
-0.198272	0.153011	0.0287953
-0.160089	0.130121	0.0212858
-0.12568	0.079119	-0.0287648
-0.114767	0.0518184	-0.051929
-0.076959	0.0720342	-0.0380026
0.00646572	0.12353	-0.0300882
0.0757223	0.169175	-0.0337677
0.0786238	0.18889	-0.0405519
0.0302203	0.193222	-0.0617041
-0.0310463	0.199183	-0.0867064
-0.0659035	0.18245	-0.0956638
-0.0558982	0.119527	-0.100589
-0.0431627	0.0370554	-0.115396
-0.0827145	-0.0216976	-0.121857
-0.157107	-0.0468951	-0.104319
-0.195573	-0.0494944	-0.0693624
-0.176354	-0.0478026	-0.0226104
-0.123698	-0.0795619	0.0308138
-0.0599019	-0.145376	0.0663907
-0.0207932	-0.201511	0.0768897
-0.0319824	-0.221158	0.0885197
-0.0522415	-0.225037	0.104871
-0.0300291	-0.224361	0.0911079
0.00957488	-0.221924	0.0419347
0.0306517	-0.22142	-0.00591528
0.0558499	-0.192965	-0.0246357
0.0995331	-0.100083	-0.00189169
0.140961	0.0313205	0.0643748
0.158349	0.135574	0.127299
0.137223	0.180268	0.124228
0.0737121	0.179464	0.0621067
0.0240064	0.161209	0.00260964
0.052985	0.15948	-0.0250453
0.113341	0.161405	-0.0343836
0.104953	0.11463	-0.0224571
0.0277874	0.0141035	0.00653404
-0.023577	-0.0682049	0.0305265
-0.00881049	-0.0841935	0.0626093
0.0393306	-0.0647647	0.124045
0.0815258	-0.0507641	0.168142
0.072048	-0.0501607	0.1468
-0.000601375	-0.0430125	0.103713
-0.0670285	-0.003528	0.0817604
-0.0630801	0.0587851	0.0567594
-0.0169142	0.0944885	0.0206662
0.0177102	0.0738933	-0.00538482
0.0262143	0.0159812	-0.0296504
0.000539148	-0.0400261	-0.0454487
-0.0308407	-0.0730566	0.00574323
-0.00773548	-0.0856671	0.116826
0.0530435	-0.104787	0.19714
0.0537454	-0.154736	0.205298
-0.0324089	-0.231341	0.17946
-0.120094	-0.295289	0.140625
-0.142311	-0.318597	0.0981067
-0.107275	-0.300132	0.0814251
-0.0643847	-0.244423	0.0735873
-0.0622233	-0.146869	0.038857
-0.0926036	-0.0131583	0.0161306
-0.0802046	0.138412	0.0527009
0.0167806	0.282178	0.112057
0.125112	0.385419	0.146825
0.16534	0.40976	0.156264
0.147707	0.354965	0.13877
0.114923	0.267525	0.105353
0.0911933	0.192625	0.0996232
0.077464	0.140541	0.120493
0.0464872	0.110613	0.119908
-0.0349331	0.0980886	0.0891668
-0.128058	0.0704907	0.0603882
-0.147858	0.0140341	0.0478233
-0.0835027	-0.038805	0.0538633
-0.00720882	-0.0465622	0.0743983
0.0210952	0.00431068	0.0836849
0.00116109	0.108611	0.0600898
-0.0390119	0.214041	0.026088
-0.0583413	0.242835	0.00895856
-0.0379882	0.188206	-0.0105159
-0.0353322	0.116913	-0.0567873
-0.101229	0.0676148	-0.105426
-0.186909	0.04055	-0.11985
-0.217593	0.0304037	-0.0831597
-0.199002	0.0243454	-0.0039878
-0.166808	0.000900723	0.0679695
-0.132183	-0.013975	0.0705797
-0.110556	0.0077556	0.0113251
-0.0911884	0.0525541	-0.0323463
-0.0266998	0.0953249	-0.0274632
0.0817539	0.140957	-0.0162654
0.157199	0.192323	-0.0369695
0.169525	0.226562	-0.0788891
0.170996	0.228927	-0.114303
0.185103	0.191161	-0.116662
0.192781	0.11217	-0.0657944
0.184773	0.024604	0.0024896
0.149227	-0.0305243	0.0242792
0.0753331	-0.06017	0.0223793
0.00874011	-0.0902705	0.0708551
0.0142543	-0.119211	0.155774
0.0511436	-0.133339	0.20236
0.0290583	-0.130157	0.194894
-0.052684	-0.108159	0.140085
-0.126734	-0.0803001	0.0386317
-0.147923	-0.0682379	-0.0409811
-0.104096	-0.0719008	-0.0212942
-0.0191462	-0.0682014	0.0516132
0.0347672	-0.0606592	0.0851072
0.0263463	-0.0634758	0.0879699
0.0127454	-0.0753321	0.10246
0.0350897	-0.0848049	0.129675
0.0612461	-0.100203	0.166072
0.0489861	-0.12349	0.181068
-0.00189763	-0.13824	0.112048
-0.0734426	-0.117903	-0.0259774
-0.12573	-0.0528299	-0.128909
-0.118443	0.034621	-0.159427
-0.0819712	0.0993841	-0.169991
-0.0782655	0.10166	-0.183691
-0.0937271	0.0349208	-0.191622
-0.0571044	-0.0666712	-0.194243
0.038416	-0.150906	-0.175768
0.140871	-0.190149	-0.12644
0.194495	-0.177116	-0.0862607
0.150283	-0.125991	-0.0791834
0.0356015	-0.083338	-0.0668787
-0.0383057	-0.0849735	-0.026271
-0.0130986	-0.101012	0.0139935
0.0418653	-0.0851853	0.0284207
0.0437854	-0.0449646	0.00207628
-0.00174189	-0.0157527	-0.073216
-0.0490625	-0.0122142	-0.162661
-0.0508631	-0.0476124	-0.207577
0.0170056	-0.110951	-0.202486
0.108552	-0.155887	-0.182784
0.134698	-0.153362	-0.153645
0.0911777	-0.126542	-0.0990003
0.0650698	-0.0872544	-0.035121
0.0893543	-0.0358139	0.0051564
0.122442	0.00769253	0.0076314
0.131163	0.02245	-0.0406188
0.0982301	0.0122112	-0.131314
0.0246144	-0.0237395	-0.209687
-0.0156112	-0.0857932	-0.229445
0.040791	-0.12971	-0.205339
0.128353	-0.112768	-0.180682
0.151296	-0.0437807	-0.175861
0.108428	0.0420218	-0.202148
0.0544168	0.109413	-0.245851
0.0218606	0.120688	-0.247958
0.00912782	0.0696078	-0.187531
-0.00665667	-0.00265869	-0.131545
-0.0609439	-0.0534488	-0.133864
-0.12436	-0.0709812	-0.147829
-0.108238	-0.0547629	-0.123391
0.00268346	-0.0244724	-0.0802234
0.105758	-0.0107373	-0.0514031
0.121907	-0.0245013	-0.0635463
0.089283	-0.0414249	-0.141791
0.0685056	-0.0381722	-0.23708
0.0811655	-0.00864343	-0.244372
0.114424	0.0391626	-0.16186
0.106877	0.0913399	-0.0889503
0.027527	0.120433	-0.0662682
-0.0405006	0.109816	-0.0586859
-0.00299221	0.0689202	-0.0489521
0.104605	0.0336002	-0.031315
0.180421	0.0425382	0.00673882
0.17086	0.100993	0.0298602
0.0822903	0.15605	0.00617626
-0.0204884	0.139595	-0.0101172
-0.0560375	0.0396574	0.0272527
-0.0130204	-0.0828422	0.0733969
0.035674	-0.15233	0.0787915
0.0420655	-0.142827	0.0511021
0.0287237	-0.0719982	-0.00623217
0.0172816	0.0217513	-0.0879778
0.00166546	0.0923605	-0.14925
-0.0162075	0.100659	-0.177607
-0.0300904	0.0447477	-0.203492
-0.0503895	-0.046465	-0.215236
-0.0610238	-0.137815	-0.179541
-0.0200219	-0.18789	-0.114057
0.0461223	-0.158897	-0.0541946
0.0705361	-0.0801193	-0.0139234
0.0400045	-0.0185224	-0.00882505
-0.00540874	-0.0092994	-0.0366091
-0.0207913	-0.0339222	-0.0552212
0.0264052	-0.0641021	-0.0463225
0.121584	-0.0643552	-0.0446398
0.188788	-0.0222275	-0.0720465
0.197559	0.0265356	-0.109177
0.218452	0.0431334	-0.135903
0.303241	0.0355579	-0.146365
0.388792	0.0239746	-0.148837
0.39091	0.0109929	-0.173614
0.307765	0.00638571	-0.239941
0.188016	0.00443576	-0.307412
0.101888	-0.0333798	-0.306472
0.107642	-0.11034	-0.241374
0.170676	-0.160155	-0.184191
0.19451	-0.137036	-0.173943
0.161288	-0.0750516	-0.190207
0.135729	-0.0223524	-0.190059
0.134791	-0.0107068	-0.134936
0.135258	-0.0597644	-0.0264495
0.125504	-0.136046	0.0506812
0.0913602	-0.188273	0.00943174
0.0230566	-0.202787	-0.109563
-0.0421007	-0.19158	-0.195214
-0.0600412	-0.150696	-0.203443
-0.0622443	-0.095724	-0.156795
-0.0884031	-0.0563736	-0.0764964
-0.103907	-0.0319483	-0.0034114
-0.0770128	-0.0139695	0.0188819
-0.0355262	-0.00848175	0.0185552
-0.00526175	-0.00261121	0.0247957
0.00822563	0.0258972	-0.00496988
-0.0174638	0.0757852	-0.0747559
-0.060559	0.123715	-0.111189
-0.0451487	0.149003	-0.0999028
0.0194073	0.142193	-0.0880755
0.0477314	0.116051	-0.081165
0.018543	0.0929182	-0.0819336
-0.0058358	0.0772842	-0.120531
0.0305124	0.050845	-0.174465
0.135984	-0.00400905	-0.185526
0.252245	-0.070669	-0.175123
0.288952	-0.10453	-0.194789
0.23615	-0.072644	-0.219712
0.181834	0.0122008	-0.211647
0.187187	0.0986076	-0.180707
0.211186	0.12871	-0.137007
0.192518	0.0831613	-0.0888969
0.128574	6.81637e-05	-0.0809509
0.0404607	-0.0582391	-0.119429
-0.0332732	-0.0707113	-0.137206
-0.0530182	-0.0468765	-0.109284
-0.0428573	0.00124461	-0.0801258
-0.0813485	0.0660014	-0.0747767
-0.175757	0.123214	-0.0919739
-0.241237	0.155685	-0.120132
-0.227851	0.15772	-0.117355
-0.14929	0.120459	-0.0643463
-0.0615897	0.0559229	-0.0186184
-0.036337	0.0128007	-0.0438437
-0.0845636	0.0147004	-0.123989
-0.12387	0.0282038	-0.197098
-0.0850205	0.0284295	-0.2169
-0.0119573	0.0294786	-0.174722
0.0128444	0.0470592	-0.111013
-0.0232146	0.0862841	-0.0930434
-0.089202	0.145235	-0.137345
-0.156104	0.195156	-0.180881
-0.195764	0.200063	-0.173356
-0.197314	0.175592	-0.143706
-0.20958	0.154069	-0.140173
-0.256514	0.127347	-0.16566
-0.276248	0.0829925	-0.193865
-0.219838	0.0279628	-0.184141
-0.116346	-0.0226138	-0.105077
-0.00866893	-0.0526434	-0.000410839
0.0836944	-0.0336463	0.0416543
0.13834	0.0163128	0.00762404
0.162256	0.0355002	-0.0316889
0.174937	0.00621072	-0.0355606
0.137989	-0.0259699	-0.0354552
0.0232842	-0.0229013	-0.0526254
-0.0910136	0.00468781	-0.0826218
-0.0956531	-1.00723e-05	-0.125747
-0.00479095	-0.0983485	-0.156226
0.0766335	-0.276248	-0.134041
0.0887114	-0.412842	-0.0880446
0.0354861	-0.402532	-0.0755459
-0.0251887	-0.261936	-0.0695667
-0.0119036	-0.102424	-0.0301315
0.0847745	-0.0266659	0.0109462
0.158598	-0.0567774	0.0276352
0.133762	-0.135676	0.025382
0.0600346	-0.19016	-0.0214455
0.00187737	-0.199889	-0.107535
-0.024271	-0.188871	-0.140216
-0.0176054	-0.176893	-0.0778848
-0.00306867	-0.158968	0.00587272
-0.00564993	-0.138476	0.0438614
0.0134341	-0.139213	0.0378563
0.102027	-0.184756	0.000923372
0.206021	-0.271715	-0.0393277
0.246271	-0.371204	-0.0420687
0.222357	-0.42888	-0.0312114
0.182728	-0.41044	-0.0659257
0.156956	-0.328562	-0.123153
0.150595	-0.236436	-0.131232
0.153559	-0.165134	-0.0850295
0.134626	-0.109327	-0.0309931
0.100534	-0.071934	-0.0086168
0.10005	-0.0763449	-0.0435663
0.130675	-0.12832	-0.114636
0.138879	-0.194019	-0.147474
0.106909	-0.224453	-0.120052
0.0526042	-0.175272	-0.0975363
-0.0291856	-0.0524289	-0.126764
-0.110129	0.0615822	-0.182369
-0.114239	0.102104	-0.221017
-0.0385378	0.096916	-0.212559
0.0488891	0.0932843	-0.15633
0.114641	0.0947456	-0.105946
0.166002	0.0938935	-0.102315
0.188592	0.0745647	-0.117272
0.184593	0.00996266	-0.0944346
0.188866	-0.0637869	-0.0359024
0.203812	-0.0836674	0.00786475
0.202888	-0.0508394	0.00620161
0.193735	-0.0214497	-0.0431711
0.192734	-0.0283478	-0.122007
0.163177	-0.0717445	-0.177736
0.0927434	-0.116141	-0.175632
0.0404841	-0.0973751	-0.155399
0.039716	-0.00347016	-0.166887
0.0672413	0.0940203	-0.184152
0.0939797	0.125756	-0.176299
0.0987955	0.09384	-0.168846
0.0565195	0.048947	-0.183246
-0.0045691	0.0240274	-0.207783
-0.021564	0.0210002	-0.231038
-0.00135264	0.00822027	-0.235748
0.0120448	-0.0342866	-0.187888
0.0157965	-0.068057	-0.115417
0.034064	-0.0487308	-0.101487
0.0640277	0.0063661	-0.151079
0.101677	0.0427481	-0.186322
0.146335	0.0365652	-0.183816
0.146355	0.00318573	-0.176551
0.059944	-0.0145623	-0.165193
-0.0558728	0.0129064	-0.152538
-0.120755	0.0582508	-0.15512
-0.132215	0.0592845	-0.13976
-0.124687	-0.00216596	-0.0647597
-0.102889	-0.0750342	0.0194389
-0.0688421	-0.0805037	0.0414429
-0.0105321	-0.00253634	0.00629279
0.0848572	0.0776106	-0.0626395
0.170565	0.0557827	-0.144567
0.166636	-0.0777928	-0.18388
0.0690209	-0.22306	-0.154318
-0.0473803	-0.26162	-0.118595
-0.126061	-0.175869	-0.12631
-0.148856	-0.0597597	-0.146799
-0.116407	-0.00879855	-0.157777
-0.0557421	-0.0206765	-0.175375
0.000242655	-0.0296552	-0.19687
0.0443857	0.00359744	-0.219694
0.0714332	0.0615242	-0.254553
0.043475	0.101818	-0.278992
-0.0369041	0.0979863	-0.260291
-0.0874092	0.074934	-0.225244
-0.0652636	0.0779177	-0.216543
-0.00906829	0.0944162	-0.228778
0.030395	0.0720617	-0.236031
0.0363475	0.013344	-0.221532
0.00878345	-0.0147384	-0.169317
-0.0116691	0.0155878	-0.0888914
0.0241234	0.0691627	-0.0221609
0.0863928	0.0849883	0.00850447
0.110029	0.0256251	0.0188485
0.0927467	-0.0728404	0.0198361
0.0715208	-0.0988783	0.00348271
0.0560033	-0.0148076	-0.0246496
0.0477477	0.0649273	-0.0505072
0.0568678	0.0269448	-0.0703338
0.0568002	-0.107053	-0.0673524
0.0232809	-0.228032	0.00345837
0.0019647	-0.238269	0.125644
0.049915	-0.118796	0.210807
0.138865	0.0310184	0.211185
0.208846	0.0775121	0.156586
0.236819	0.0161287	0.0868994
0.196898	-0.0548813	0.0286151
0.0989138	-0.0672313	0.00764595
0.0220541	-0.0312755	0.00812616
0.0179912	0.00113041	-0.00544453
0.0507325	-0.00290423	-0.00688356
0.0835629	-0.0169994	0.0380394
0.123367	0.0126884	0.0847902
0.153302	0.0610705	0.0763667
0.15449	0.0427262	0.0409529
0.15418	-0.0671688	0.0188359
0.171148	-0.19256	0.00160493
0.178983	-0.241293	-0.00676498
0.159303	-0.177618	0.00339134
0.135832	-0.0451829	-0.0075333
0.113836	0.0649469	-0.0531102
0.0877996	0.0953923	-0.0717313
0.0764744	0.0667332	-0.0513115
0.0745249	0.0268421	-0.0428967
0.0391418	0.000254886	-0.0446959
-0.0261263	-0.0205785	-0.0257843
-0.0779984	-0.0541702	-0.011026
-0.109142	-0.0995878	-0.0134361
-0.122807	-0.118288	0.00126145
-0.110337	-0.0779724	0.0182671
-0.0903386	-0.00852995	-0.00493918
-0.0750012	0.0108011	-0.0398755
-0.0314081	-0.0651173	-0.0425679
0.0482015	-0.188169	-0.0232839
0.0990984	-0.264518	-0.00502967
0.0766339	-0.265343	0.00881991
0.0125999	-0.240268	0.00331086
-0.0499195	-0.238234	-0.0194899
-0.0898199	-0.255472	-0.0286672
-0.0982629	-0.242223	-0.0266938
-0.0661106	-0.164568	-0.047018
-0.00370858	-0.0588356	-0.0737211
0.0722181	-0.020647	-0.0640706
0.14151	-0.0794983	-0.0210175
0.156263	-0.153226	0.025745
0.100702	-0.147699	0.0507982
0.0366278	-0.0642725	0.0308122
0.0218398	0.0210648	-0.0281792
0.043247	0.0308138	-0.0660223
0.0712505	-0.0456572	-0.0437234
0.108316	-0.113156	0.00647948
0.143881	-0.0621303	0.0295126
0.164044	0.0814579	0.00589729
0.176942	0.18822	-0.0636816
0.17714	0.181467	-0.157882
0.130559	0.0916343	-0.228466
0.0364148	0.00536717	-0.240584
-0.0532618	-0.000409044	-0.205692
-0.109874	0.0473912	-0.149116
-0.143909	0.0364782	-0.0771424
-0.154078	-0.0757574	-0.01349
-0.137532	-0.197902	0.00497168
-0.126956	-0.225232	-0.0143998
-0.125531	-0.163186	-0.0477754
-0.0932506	-0.0876083	-0.0982683
-0.0431922	-0.0650035	-0.156089
-0.018471	-0.0974016	-0.171809
-0.0143252	-0.118944	-0.13837
-0.026713	-0.0785965	-0.105362
-0.0690264	-0.011262	-0.0872029
-0.103667	0.0244518	-0.0721891
-0.0680931	0.0383181	-0.0845923
0.0108971	0.0769355	-0.132199
0.0701067	0.149493	-0.158953
0.104052	0.225243	-0.150205
0.129886	0.246407	-0.160316
0.138004	0.182031	-0.198594
0.118576	0.0828763	-0.234277
0.0744281	0.0402694	-0.270194
-0.00730676	0.0760334	-0.290079
-0.108446	0.129918	-0.245187
-0.1576	0.121592	-0.172907
-0.132703	0.0330566	-0.159434
-0.0874968	-0.064538	-0.193393
-0.0585473	-0.0764745	-0.217997
-0.0427796	0.00821294	-0.219672
-0.0410593	0.0952111	-0.188078
-0.0277461	0.0840077	-0.107875
0.0282769	-0.0214838	-0.0236183
0.0858957	-0.116667	0.0206898
0.0883667	-0.126558	0.0408011
0.044121	-0.0796856	0.0415431
7.68575e-05	-0.048985	-0.00647519
-0.0239162	-0.0539582	-0.0817512
-0.0214864	-0.0612715	-0.128437
-0.000332216	-0.0229368	-0.142467
0.00384403	0.0612418	-0.148903
-0.0238394	0.124945	-0.156203
-0.043717	0.102806	-0.173069
-0.0237647	0.0115149	-0.199554
0.00991362	-0.076052	-0.196369
0.0255143	-0.124716	-0.141447
0.0387945	-0.1481	-0.0669883
0.0546778	-0.172812	-0.00904042
0.0733288	-0.217998	0.0180598
0.111718	-0.25213	0.00497381
0.144474	-0.213826	-0.0260605
0.110869	-0.110857	-0.0271999
0.0180629	-0.041026	0.0100316
-0.0732087	-0.0609833	0.0339334
-0.144948	-0.128127	0.00724219
-0.189706	-0.166159	-0.046915
-0.184777	-0.124428	-0.0913686
-0.142784	-0.0223816	-0.118211
-0.105856	0.0514321	-0.130166
-0.0729074	0.0263772	-0.131177
-0.0166454	-0.052157	-0.128742
0.0476388	-0.101025	-0.113764
0.0853669	-0.104307	-0.0690069
0.0979645	-0.0978334	-0.0256555
0.103477	-0.10825	-0.0384559
0.0953298	-0.123305	-0.0887292
0.0724312	-0.0975624	-0.120846
0.054317	0.00696225	-0.123365
0.0287806	0.147419	-0.104397
-0.00200443	0.215989	-0.0566733
0.00364311	0.167751	-0.00936142
0.041098	0.0600465	-0.00807552
0.0508689	-0.0103298	-0.0296191
0.0217874	0.00399313	-0.0326588
0.000326702	0.0677604	-0.0388345
-2.50824e-05	0.0938423	-0.0609449
0.00632549	0.045464	-0.0566592
0.0144967	-0.0239038	-0.0314509
0.00644884	-0.0588408	-0.0380103
-0.0276483	-0.073786	-0.0605629
-0.0447897	-0.101201	-0.065511
-0.0015883	-0.129608	-0.0710652
0.071774	-0.115412	-0.0788949
0.122948	-0.0340626	-0.0518502
0.156004	0.0606099	-0.0184509
0.186574	0.0695681	-0.0368844
0.215495	-0.0421508	-0.0971851
0.249688	-0.195809	-0.167658
0.274945	-0.275619	-0.231461
0.242701	-0.232461	-0.242333
0.160965	-0.13022	-0.172092
0.0997446	-0.0767821	-0.0836921
0.0845235	-0.114547	-0.0499052
0.0944264	-0.195807	-0.0599934
0.114909	-0.250684	-0.0724517
0.128555	-0.235961	-0.0693959
0.108378	-0.164044	-0.0364513
0.0576895	-0.0848394	0.0106777
0.00931952	-0.0134038	0.0191406
-0.0387287	0.0760833	-0.0201424
-0.0914562	0.162579	-0.0482842
-0.11461	0.188762	-0.0353281
-0.0781719	0.140884	-0.00135191
0.00714197	0.0614807	0.0312902
0.118914	0.00479143	0.0468218
0.227049	0.0130778	0.0322351
0.259084	0.0742644	0.0140459
0.189427	0.108076	0.0192999
0.0942858	0.0671271	0.0225519
0.0373168	-0.0082622	-0.0045844
0.00657494	-0.0624981	-0.0406839
-0.014978	-0.0910144	-0.0507468
-0.0351241	-0.0999256	-0.0335668
-0.0762406	-0.0959732	-0.0130153
-0.117474	-0.0935577	-0.0156294
-0.099428	-0.0793368	-0.0548243
-0.0317032	-0.0212532	-0.100957
0.016748	0.0586746	-0.086419
0.0151701	0.107157	-0.000883418
-0.00618279	0.11589	0.0781969
-0.0264583	0.100497	0.0879609
-0.0281696	0.0712332	0.0522833
0.0072974	0.0628098	0.0140319
0.0533172	0.0893749	0.00202873
0.0599317	0.109189	0.0494738
0.0329644	0.0865913	0.136345
0.0154646	0.0452432	0.184201
-0.000819319	0.0292164	0.175727
-0.0279556	0.0628642	0.16859
-0.0246242	0.142586	0.181174
0.0256822	0.218841	0.17984
0.100244	0.232911	0.166397
0.191939	0.17532	0.149793
0.282656	0.0798574	0.118717
0.316962	-0.0189363	0.101555
0.282056	-0.0863835	0.145704
0.233161	-0.102243	0.20593
0.194925	-0.0920878	0.207658
0.149007	-0.096229	0.175616
0.092506	-0.124198	0.163671
0.0396059	-0.169012	0.17123
-0.00509287	-0.216063	0.194102
-0.0185748	-0.236193	0.229947
0.0218901	-0.20368	0.236828
0.0806484	-0.119178	0.211282
0.111369	-0.0106463	0.214046
0.124157	0.0714897	0.246017
0.136641	0.0921832	0.246655
0.129488	0.0696953	0.20841
0.0970948	0.0475515	0.166163
0.0588622	0.0480092	0.132368
0.0187286	0.0637835	0.106491
0.000740776	0.0584767	0.0908379
0.0401062	0.0154321	0.0592641
0.112124	-0.0320421	0.00801771
0.147736	-0.0437746	-0.0062317
0.111846	-0.0372422	0.0607725
0.0343761	-0.0585622	0.167924
-0.0408695	-0.120273	0.244818
-0.0710233	-0.211218	0.251547
-0.0380729	-0.290986	0.199307
0.0108143	-0.300739	0.15922
0.00436439	-0.218136	0.200861
-0.0513663	-0.084509	0.295858
-0.0866288	0.0613489	0.34794
-0.0852264	0.195741	0.317837
-0.0828505	0.270719	0.246551
-0.0884187	0.255468	0.188269
-0.103458	0.178731	0.168465
-0.121322	0.0765269	0.181531
-0.108879	-0.0224687	0.195489
-0.0569562	-0.0630038	0.186634
-0.018437	-0.0239754	0.174634
-0.0116197	0.0347243	0.199714
0.00216233	0.0595442	0.247049
0.0307181	0.0416925	0.261659
0.0500627	-0.00746769	0.229673
0.0639933	-0.0545093	0.177467
0.0838244	-0.0528686	0.133011
0.0707392	-0.010665	0.134939
0.00302237	0.0169375	0.195908
-0.0691681	0.0162966	0.252412
-0.107443	0.0123106	0.241375
-0.118123	0.0182365	0.212958
-0.0898232	0.0368244	0.232352
0.00211224	0.0680718	0.271355
0.132433	0.0925043	0.278752
0.262034	0.100553	0.254152
0.364782	0.118086	0.210885
0.380671	0.151446	0.178971
0.288803	0.153324	0.218598
0.172583	0.0883746	0.308205
0.112836	-0.0273583	0.341433
0.0963387	-0.138124	0.294921
0.0848802	-0.171326	0.245281
0.0701111	-0.0962344	0.225884
0.0489671	0.021054	0.226668
0.0406355	0.0919706	0.250532
0.0896008	0.101255	0.254196
0.182879	0.0978387	0.185794
0.237122	0.116658	0.108599
0.212459	0.138689	0.112653
0.163801	0.112424	0.177281
0.143631	0.025559	0.227683
0.159977	-0.0621081	0.243991
0.185834	-0.0863212	0.231493
0.169982	-0.058984	0.207933
0.102846	-0.0532153	0.200198
0.0568557	-0.12835	0.189897
0.0775961	-0.249852	0.124183
0.100305	-0.313635	0.0255002
0.0719489	-0.26863	-0.0139756
0.0310255	-0.160872	0.0435275
0.0333422	-0.0792753	0.149583
0.0921568	-0.0728686	0.237984
0.176068	-0.109939	0.261807
0.218912	-0.0964487	0.227652
0.169881	0.0154182	0.206082
0.0635434	0.158743	0.245313
-0.00360873	0.234474	0.303091
-0.00412596	0.223249	0.318142
0.00130273	0.167273	0.287437
-0.0437972	0.107037	0.235112
-0.136537	0.0632749	0.186095
-0.235202	0.0379951	0.15387
-0.265677	0.0170229	0.12515
-0.176928	0.0170936	0.0746793
-0.0256086	0.0697216	0.0257168
0.0880867	0.146195	0.0404783
0.143242	0.174995	0.125891
0.171444	0.136547	0.202561
0.178116	0.0699773	0.203503
0.172811	0.0230812	0.138786
0.178781	0.0369309	0.0619794
0.180127	0.0816688	0.0207708
0.148997	0.0619016	0.0479282
0.0979546	-0.058701	0.113396
0.0525573	-0.187724	0.157508
0.00353781	-0.211376	0.195888
-0.0461594	-0.11403	0.284837
-0.0529373	0.0271431	0.407297
-0.0187276	0.110178	0.501689
0.0120148	0.0940155	0.552209
0.0274201	0.0405217	0.560959
0.0386452	0.0330169	0.546223
0.0368277	0.080303	0.585482
0.0387006	0.127218	0.725929
0.0824676	0.141063	0.882399
0.140853	0.140792	0.956703
0.164188	0.170676	0.982631
0.166392	0.251447	1.03894
0.168504	0.349472	1.13654
0.150378	0.402493	1.25609
0.0986136	0.397533	1.35537
0.0301238	0.376784	1.37289
-0.0518086	0.37196	1.32976
-0.11573	0.371494	1.33947
-0.0858477	0.351823	1.42971
0.0580827	0.312013	1.52988
0.233106	0.283522	1.60315
0.359034	0.308862	1.66032
0.419766	0.400061	1.70759
0.422304	0.517842	1.76883
0.402177	0.596147	1.85624
0.397291	0.614536	1.91265
0.376895	0.608293	1.89353
0.295094	0.60762	1.84901
0.187756	0.584719	1.84275
0.132637	0.504847	1.87467
0.148866	0.392516	1.91611
0.207854	0.321283	1.93976
0.2622	0.356058	1.9264
0.247681	0.490492	1.89993
0.164117	0.622183	1.91894
0.0966718	0.652053	1.98378
0.114904	0.588319	2.04528
0.186707	0.52197	2.08226
0.249363	0.515778	2.11715
0.289821	0.576521	2.16082
0.317441	0.663095	2.21289
0.353745	0.700829	2.26086
0.432227	0.669104	2.27328
0.525899	0.641631	2.24371
0.547548	0.679168	2.23466
0.481637	0.745286	2.29347
0.405132	0.787735	2.37316
0.368571	0.795313	2.39013
0.376955	0.785137	2.33063
0.423629	0.793873	2.24587
0.468872	0.848547	2.20507
0.463762	0.917376	2.25725
0.424314	0.951137	2.37497
0.403526	0.962223	2.45995
0.397688	0.983441	2.46067
0.376046	1.00747	2.43541
0.353768	1.01579	2.43508
0.363645	1.00228	2.44531
0.38931	0.984302	2.45897
0.402604	0.999024	2.47203
0.408032	1.06586	2.45106
0.39604	1.13124	2.41047
0.366709	1.12364	2.42595
0.366466	1.04524	2.50197
0.398481	0.9693	2.5587
0.406727	0.964882	2.56582
0.381926	1.04814	2.54523
0.378048	1.1708	2.50942
0.406505	1.25055	2.47862
0.437453	1.24759	2.48216
0.450234	1.20091	2.4755
0.419602	1.17532	2.4156
0.346345	1.18906	2.37257
0.298103	1.20251	2.4288
0.335344	1.15882	2.54337
0.418112	1.0513	2.63928
0.467012	0.942578	2.69453
0.458994	0.902129	2.70646
0.418436	0.929184	2.6987
0.389527	0.972542	2.72317
0.420913	0.980864	2.76856
0.495479	0.952835	2.76625
0.512264	0.935536	2.70502
0.428205	0.957398	2.63593
0.330801	0.998208	2.58848
0.315768	1.03399	2.55869
0.404675	1.05816	2.53647
0.547789	1.07996	2.49549
0.658658	1.1229	2.43963
0.674977	1.19429	2.43396
0.63239	1.25029	2.52816
0.610044	1.26086	2.6678
0.604653	1.24715	2.76544
0.563035	1.22079	2.79544
0.486453	1.18191	2.79123
0.421947	1.15399	2.79318
0.399567	1.15571	2.82117
0.428059	1.17177	2.83342
0.499141	1.20639	2.77168
0.552369	1.27326	2.66287
0.550675	1.33694	2.61536
0.547664	1.34859	2.68619
0.581155	1.32185	2.83526
0.598991	1.3008	2.99236
0.551633	1.31136	3.10267
0.449386	1.36732	3.14383
0.31945	1.43622	3.13991
0.226029	1.44026	3.12734
0.235658	1.37046	3.0896
0.321974	1.30259	2.99777
0.386965	1.28628	2.89726
0.39533	1.29764	2.86052
0.390145	1.31071	2.88428
0.389484	1.30769	2.92069
0.380074	1.2921	2.94863
0.367975	1.30765	2.9512
0.355908	1.37197	2.91728
0.336324	1.43476	2.89541
0.336669	1.45576	2.90619
0.393195	1.46288	2.8891
0.451537	1.495	2.81849
0.441356	1.55166	2.76571
0.39258	1.60564	2.76248
0.359523	1.61827	2.77988
0.355167	1.57365	2.81735
0.382951	1.51638	2.86719
0.41942	1.49908	2.87695
0.402916	1.51407	2.85172
0.34346	1.51717	2.85991
0.326431	1.47933	2.90265
0.375719	1.39218	2.9284
0.433994	1.27932	2.93946
0.452885	1.2016	2.94993
0.419246	1.21339	2.95451
0.348497	1.30443	2.9877
0.294492	1.41343	3.0746
0.289047	1.47451	3.14643
0.287741	1.47405	3.13532
0.255295	1.45387	3.08186
0.224686	1.44764	3.04675
0.239793	1.43674	3.04505
0.290018	1.39137	3.05743
0.348217	1.31876	3.04407
0.395107	1.27595	2.96761
0.408035	1.31238	2.87119
0.407811	1.39929	2.84787
0.450818	1.4634	2.9193
0.539207	1.46562	3.0123
0.608495	1.41873	3.06261
0.607715	1.34633	3.0614
0.556072	1.28213	3.04141
0.497001	1.25203	3.04766
0.461595	1.23543	3.09365
0.446407	1.20389	3.1364
0.407326	1.17859	3.14553
0.323526	1.20304	3.14914
0.257371	1.27893	3.16716
0.287523	1.36414	3.17275
0.383223	1.41403	3.14016
0.446501	1.40457	3.07465
0.435111	1.37617	2.99061
0.374431	1.39995	2.928
0.310497	1.47866	2.94827
0.296777	1.53561	3.0568
0.342779	1.53759	3.16053
0.375711	1.51647	3.16978
0.347344	1.50792	3.09618
0.305536	1.52991	3.00975
0.297746	1.56574	2.95968
0.311619	1.56486	2.97495
0.323833	1.51389	3.0236
0.336451	1.48833	3.03578
0.343058	1.54291	3.01398
0.363814	1.62411	3.03665
0.434936	1.6401	3.09958
0.511661	1.55879	3.12288
0.505647	1.43913	3.0985
0.421325	1.39222	3.07312
0.356312	1.46685	3.06637
0.359824	1.58833	3.0908
0.409056	1.64823	3.13792
0.463837	1.63764	3.13929
0.468714	1.61442	3.06714
0.413831	1.60371	3.01299
0.384241	1.57449	3.03815
0.438188	1.49929	3.07931
0.512482	1.40049	3.07846
0.529859	1.35267	3.051
0.48984	1.40528	3.01693
0.421415	1.51727	3.00251
0.366278	1.59543	3.0584
0.368053	1.58963	3.14966
0.406505	1.52659	3.17875
0.407877	1.46992	3.13061
0.359132	1.4573	3.07782
0.314726	1.47612	3.06643
0.297813	1.48502	3.10974
0.295121	1.46085	3.19058
0.297317	1.42762	3.24299
0.2935	1.43054	3.22508
0.279858	1.47232	3.1918
0.276773	1.49119	3.19773
0.285351	1.45424	3.21912
0.253245	1.4088	3.21187
0.187142	1.41944	3.17676
0.178065	1.50391	3.13933
0.26841	1.61871	3.12949
0.408082	1.67561	3.16139
0.520993	1.62682	3.19473
0.550766	1.53544	3.17392
0.47965	1.51001	3.11199
0.379508	1.56439	3.07212
0.359142	1.62396	3.07149
0.436685	1.61867	3.07994
0.528115	1.54565	3.07685
0.552656	1.46355	3.06766
0.49951	1.44147	3.07069
0.412302	1.46662	3.11235
0.360215	1.46106	3.18093
0.381761	1.41505	3.21276
0.422806	1.40705	3.16921
0.410861	1.47577	3.10455
0.368513	1.55372	3.07891
0.363079	1.56008	3.08645
0.373244	1.471	3.09415
0.342086	1.34206	3.09347
0.275145	1.29183	3.07443
0.212309	1.37978	3.04288
0.20147	1.52829	3.04936
0.273413	1.61544	3.09455
0.37966	1.59371	3.10197
0.406891	1.515	3.05217
0.328936	1.47542	3.01335
0.258863	1.52813	3.02327
0.285323	1.60651	3.06819
0.374125	1.61057	3.13479
0.437071	1.54089	3.17539
0.4106	1.49852	3.13819
0.302791	1.5517	3.07976
0.218631	1.6553	3.09689
0.261116	1.69611	3.17409
0.38392	1.62157	3.22072
0.460048	1.50588	3.20189
0.460972	1.47167	3.12074
0.449569	1.55003	3.01246
0.467894	1.65246	2.96556
0.513054	1.68528	3.03072
0.545111	1.66005	3.11752
0.511863	1.66566	3.12696
0.431383	1.7574	3.07775
0.383498	1.88983	3.02591
0.385281	1.96523	2.99823
0.376401	1.93447	3.01834
0.334345	1.83651	3.06608
0.310118	1.75383	3.08217
0.340342	1.72316	3.0629
0.42128	1.69609	3.06139
0.513093	1.62031	3.08301
0.54684	1.53592	3.09488
0.500363	1.52967	3.08859
0.444674	1.62411	3.06879
0.463551	1.7523	3.04671
0.535768	1.8262	3.05084
0.590584	1.80068	3.09573
0.596967	1.74428	3.14883
0.557785	1.77173	3.18443
0.508779	1.89132	3.21759
0.508411	1.98982	3.26021
0.556907	1.98667	3.27804
0.573844	1.89947	3.24592
0.510251	1.79532	3.18156
0.416628	1.74433	3.13144
0.356376	1.75499	3.13792
0.349743	1.75601	3.21002
0.381767	1.6955	3.27516
0.409657	1.62852	3.25413
0.387752	1.62346	3.17093
0.34964	1.65937	3.12052
0.378458	1.68601	3.13173
0.469483	1.68379	3.15893
0.535465	1.66555	3.17452
0.531256	1.68298	3.17791
0.490996	1.77811	3.17345
0.45604	1.89753	3.19411
0.462406	1.93384	3.26666
0.516567	1.88197	3.33543
0.552865	1.81636	3.32974
0.52594	1.79106	3.27951
0.497507	1.80087	3.24034
0.537681	1.79768	3.21768
0.613135	1.7381	3.22805
0.655072	1.66062	3.27156
0.653589	1.65468	3.28003
0.624289	1.73664	3.22156
0.596112	1.82827	3.17992
0.611051	1.8634	3.19877
0.654304	1.83442	3.23216
0.664078	1.78316	3.25073
0.653245	1.77056	3.25352
0.694036	1.81282	3.22312
0.775466	1.8508	3.18925
0.803809	1.8243	3.213
0.720929	1.748	3.26382
0.535973	1.68697	3.25866
0.326732	1.68546	3.21563
0.219089	1.7234	3.20539
0.268993	1.74158	3.22672
0.382123	1.70792	3.23778
0.44329	1.66554	3.22892
0.43685	1.67767	3.19655
0.410859	1.75463	3.16685
0.416257	1.83743	3.19389
0.469139	1.85204	3.25853
0.531335	1.79343	3.27726
0.53835	1.75373	3.22703
0.502537	1.79821	3.16111
0.495974	1.88779	3.11609
0.522831	1.92755	3.10095
0.515325	1.86914	3.10928
0.439803	1.7559	3.1144
0.340148	1.69056	3.09764
0.290855	1.71629	3.09296
0.342413	1.75089	3.13405
0.471744	1.7163	3.19574
0.565557	1.64801	3.21786
0.549882	1.62516	3.17735
0.486778	1.68179	3.09018
0.485274	1.79564	2.99553
0.569432	1.89363	2.93684
0.688385	1.90068	2.90975
0.781562	1.8336	2.8538
0.797793	1.78088	2.75048
0.733731	1.77513	2.66128
0.653081	1.77263	2.63093
0.609544	1.73309	2.63846
0.583059	1.65343	2.65394
0.557904	1.54861	2.66722
0.571531	1.46719	2.67185
0.63096	1.42658	2.67429
0.697849	1.37464	2.68906
0.738326	1.27821	2.6812
0.717424	1.1961	2.5866
0.608577	1.19415	2.43411
0.4754	1.26822	2.31878
0.433224	1.36696	2.27942
0.47582	1.42238	2.29499
0.507402	1.40579	2.35289
0.491459	1.38221	2.40195
0.455092	1.42116	2.38255
0.416797	1.49485	2.33119
0.392588	1.52009	2.31488
0.38547	1.46431	2.30944
0.350074	1.36609	2.28352
0.280111	1.29281	2.2736
0.255122	1.28742	2.2999
0.306553	1.32251	2.34218
0.375513	1.33565	2.39893
0.418222	1.31406	2.44151
0.433502	1.30731	2.40718
0.414705	1.33614	2.31586
0.393508	1.3642	2.27344
0.424931	1.33728	2.30932
0.470119	1.23969	2.35911
0.436519	1.11707	2.38429
0.317711	1.05034	2.37405
0.196035	1.07066	2.32411
0.142249	1.12901	2.27326
0.179461	1.15771	2.26966
0.261481	1.15003	2.28521
0.29824	1.15188	2.2769
0.277029	1.19874	2.25733
0.281374	1.2603	2.24857
0.35088	1.26916	2.24716
0.41856	1.19337	2.26722
0.418092	1.06179	2.30473
0.366189	0.955893	2.32033
0.309711	0.948336	2.29321
0.285793	1.01712	2.24992
0.299051	1.07474	2.20305
0.303954	1.07179	2.144
0.25632	1.02984	2.08269
0.18979	0.99942	2.04856
0.174436	1.02514	2.05164
0.213319	1.10241	2.08165
0.261206	1.15867	2.10926
0.299739	1.14838	2.08941
0.325892	1.09837	2.01632
0.3392	1.04857	1.96099
0.363777	1.00089	1.98132
0.411594	0.958101	2.03529
0.428474	0.929281	2.05111
0.368032	0.917167	2.01539
0.27298	0.914711	1.96072
0.221479	0.911958	1.92767
0.242584	0.889345	1.95669
0.304582	0.83613	2.03256
0.34561	0.793033	2.0884
0.295834	0.809745	2.09185
0.177528	0.868909	2.08839
0.110279	0.924692	2.09744
0.156881	0.952459	2.08391
0.24158	0.950525	2.04019
0.282518	0.938971	1.98424
0.297962	0.953991	1.90876
0.322248	0.985481	1.83876
0.357879	0.980948	1.83243
0.393891	0.930422	1.86607
0.385883	0.873186	1.85986
0.312792	0.851728	1.81777
0.24786	0.879436	1.78425
0.268984	0.925081	1.75629
0.319892	0.932687	1.73462
0.30662	0.89997	1.74691
0.249109	0.877633	1.77268
0.224841	0.90424	1.77416
0.269493	0.951463	1.77281
0.363572	0.964101	1.7782
0.436088	0.925624	1.7518
0.412427	0.876673	1.69418
0.325147	0.869532	1.67501
0.28868	0.914069	1.72426
0.333338	0.96571	1.81477
0.391611	0.973607	1.90328
0.40537	0.929496	1.92565
0.359388	0.880404	1.83942
0.27289	0.876535	1.71462
0.216833	0.913861	1.65551
0.24693	0.9476	1.6644
0.310359	0.945519	1.66982
0.335913	0.913368	1.63502
0.331198	0.885501	1.55468
0.337298	0.886577	1.46023
0.357264	0.893064	1.42093
0.383377	0.84733	1.47097
0.408644	0.747812	1.56477
0.404849	0.67396	1.64212
0.375578	0.678357	1.68525
0.365469	0.737509	1.70173
0.377031	0.782803	1.70525
0.367003	0.760931	1.70698
0.325669	0.675264	1.69245
0.288882	0.6222	1.63137
0.272356	0.67822	1.54454
0.280189	0.791073	1.49894
0.313655	0.855452	1.51615
0.329459	0.842816	1.55336
0.282685	0.795476	1.58587
0.206079	0.770876	1.59973
0.167697	0.803951	1.57572
0.160532	0.857504	1.52472
0.147181	0.853613	1.48672
0.124274	0.7937	1.45651
0.100811	0.755003	1.42011
0.0848879	0.786915	1.41244
0.0971109	0.857032	1.45921
0.137112	0.909272	1.51935
0.149292	0.901896	1.55391
0.118204	0.834501	1.56136
0.116272	0.776314	1.53238
0.180124	0.783726	1.46264
0.255968	0.832506	1.40718
0.28763	0.860809	1.38875
0.273288	0.84098	1.35446
0.234403	0.773682	1.29856
0.223385	0.68923	1.28761
0.295479	0.627223	1.32886
0.394313	0.590412	1.37028
0.405107	0.562913	1.39326
0.312189	0.573272	1.36947
0.198917	0.655542	1.27076
0.127305	0.791082	1.1561
0.114028	0.911665	1.12013
0.143301	0.950041	1.14713
0.160444	0.899431	1.16871
0.141098	0.826418	1.17454
0.140702	0.790787	1.18452
0.196814	0.782113	1.20592
0.255778	0.746625	1.25849
0.267485	0.665333	1.33432
0.248816	0.591764	1.37255
0.225926	0.597461	1.34696
0.226529	0.67676	1.32226
0.267315	0.741351	1.33605
0.307346	0.725947	1.35081
0.280231	0.662231	1.32614
0.200211	0.632491	1.25792
0.14874	0.680116	1.16773
0.159756	0.772965	1.11387
0.206441	0.824225	1.13654
0.2445	0.785365	1.18389
0.225885	0.697647	1.18558
0.146571	0.640526	1.15496
0.0719559	0.62519	1.15278
0.0721209	0.612306	1.18864
0.13289	0.568607	1.22147
0.200759	0.490687	1.20515
0.256343	0.437148	1.13221
0.287336	0.49667	1.05407
0.282317	0.657484	1.04838
0.259918	0.800705	1.11827
0.244172	0.849064	1.18471
0.22276	0.820986	1.19318
0.203482	0.765219	1.1737
0.231189	0.740341	1.16139
0.304505	0.766843	1.16441
0.360818	0.788765	1.17506
0.372675	0.754708	1.15705
0.36416	0.707687	1.07615
0.338348	0.704089	0.982529
0.3017	0.716992	0.96683
0.283451	0.690399	1.0375
0.265145	0.610102	1.11664
0.204895	0.524998	1.15302
0.130964	0.502051	1.14487
0.108998	0.567585	1.1144
0.135594	0.652833	1.10698
0.175382	0.664114	1.13518
0.226458	0.60993	1.1284
0.276153	0.576077	1.03315
0.311832	0.608008	0.930855
0.354958	0.685083	0.912941
0.404579	0.744253	0.963886
0.402923	0.722739	1.03434
0.338987	0.642112	1.09412
0.285002	0.61058	1.0922
0.272971	0.676379	1.02849
0.276869	0.764235	0.987977
0.283008	0.7682	1.00263
0.278283	0.67309	1.0068
0.235044	0.571286	0.972379
0.183463	0.566688	0.934219
0.182449	0.649621	0.91218
0.216747	0.706695	0.907821
0.242924	0.665921	0.923819
0.268665	0.579093	0.905458
0.310487	0.552733	0.807276
0.342075	0.617114	0.697325
0.340606	0.69173	0.6792
0.29902	0.687456	0.749255
0.215749	0.61544	0.834092
0.137126	0.573684	0.891576
0.131646	0.64833	0.903302
0.19442	0.807676	0.882918
0.264263	0.922138	0.882138
0.31338	0.88244	0.91101
0.352523	0.721576	0.921428
0.377869	0.573797	0.910044
0.388189	0.532097	0.921042
0.392372	0.588366	0.965349
0.369373	0.684074	1.00956
0.311328	0.770838	1.02401
0.260612	0.83502	0.987208
0.256336	0.880318	0.911769
0.271702	0.895439	0.855843
0.26477	0.835013	0.861729
0.228803	0.70602	0.889789
0.174916	0.594102	0.879258
0.132306	0.566755	0.826779
0.1479	0.604144	0.773451
0.23061	0.641993	0.744968
0.315497	0.626645	0.74546
0.348282	0.550349	0.742446
0.346755	0.495698	0.68391
0.340648	0.558892	0.588018
0.333381	0.732483	0.563503
0.327332	0.900613	0.652021
0.321626	0.964044	0.767421
0.286055	0.905295	0.823746
0.220375	0.772956	0.806782
0.178135	0.644111	0.750747
0.178819	0.552748	0.698215
0.203127	0.462997	0.676666
0.252219	0.356838	0.644945
0.327988	0.286681	0.559864
0.377082	0.305944	0.489884
0.361112	0.386311	0.548344
0.311187	0.465288	0.717365
0.242614	0.49704	0.865486
0.150944	0.488923	0.899859
0.077697	0.496419	0.815783
0.0571157	0.545074	0.678422
0.0595933	0.574528	0.611523
0.0699486	0.520685	0.661539
0.112744	0.414976	0.722067
0.168539	0.352737	0.693798
0.204251	0.401396	0.625735
0.24026	0.535527	0.593882
0.284779	0.645372	0.600245
0.306861	0.63376	0.61069
0.312878	0.515273	0.590051
0.328492	0.391262	0.521114
0.330134	0.33633	0.463611
0.286402	0.327545	0.502159
0.208922	0.293795	0.597505
0.12056	0.214035	0.632483
0.0527435	0.152445	0.580914
0.061727	0.172066	0.513623
0.155851	0.269403	0.488613
0.241353	0.376323	0.523514
0.233287	0.436341	0.586485
0.152623	0.464	0.602663
0.0757423	0.506728	0.53953
0.0657328	0.553267	0.469981
0.130288	0.543735	0.463645
0.209817	0.459546	0.513416
0.230365	0.36979	0.57269
0.205338	0.355773	0.599449
0.203026	0.445604	0.578014
0.223382	0.584984	0.545481
0.220651	0.658459	0.548681
0.192578	0.595446	0.564888
0.172983	0.458162	0.524464
0.170565	0.37044	0.430396
0.169096	0.37001	0.368266
0.150707	0.415143	0.40497
0.0950726	0.451931	0.522326
0.0268158	0.456808	0.642859
0.0218235	0.45621	0.673125
0.116543	0.499607	0.584385
0.249951	0.565107	0.46952
0.346519	0.578062	0.424122
0.385955	0.521829	0.423272
0.35755	0.441132	0.394487
0.270783	0.369054	0.337978
0.175823	0.31874	0.286107
0.113189	0.295324	0.267981
0.0678429	0.285848	0.30489
0.0391971	0.276477	0.364137
0.0665286	0.289353	0.359247
0.138699	0.335616	0.2725
0.210574	0.386224	0.191118
0.267157	0.412491	0.181614
0.300372	0.413732	0.21976
0.285894	0.404195	0.272559
0.237178	0.397263	0.323863
0.202686	0.402412	0.360043
0.181333	0.403655	0.400724
0.158102	0.37568	0.483816
0.16101	0.323684	0.55748
0.191237	0.276847	0.534886
0.194323	0.247753	0.447651
0.149838	0.233038	0.399715
0.0911683	0.221116	0.420928
0.0360437	0.200513	0.47387
-0.00246543	0.18591	0.519027
0.00842906	0.206848	0.506663
0.0595982	0.260935	0.431517
0.106516	0.317213	0.371314
0.143062	0.344248	0.379604
0.179649	0.348965	0.403515
0.181612	0.367454	0.390793
0.12917	0.419681	0.361309
0.0547363	0.473073	0.352626
-0.0144609	0.478344	0.374051
-0.0617745	0.419368	0.420308
-0.0567843	0.332872	0.435636
0.00998675	0.28633	0.36648
0.0949059	0.31454	0.268499
0.164735	0.377664	0.255148
0.21678	0.422484	0.336904
0.231702	0.441295	0.420168
0.207993	0.447132	0.425581
0.178818	0.444685	0.346015
0.157498	0.427184	0.240691
0.121639	0.384602	0.196268
0.0792187	0.300062	0.224478
0.0756987	0.200081	0.246043
0.112287	0.143172	0.215461
0.151307	0.14742	0.184756
0.165994	0.18577	0.218667
0.137111	0.249853	0.311093
0.0557358	0.331405	0.405268
-0.0358071	0.391283	0.430819
-0.0742908	0.409156	0.360939
-0.0634525	0.393894	0.26286
-0.0457867	0.347123	0.245357
-0.0287937	0.299464	0.311154
-0.0125518	0.311236	0.367799
-0.0246225	0.38316	0.362855
-0.0579363	0.441464	0.323995
-0.0685865	0.447572	0.297286
-0.0609277	0.408694	0.320521
-0.0549139	0.348566	0.384853
-0.0268618	0.309145	0.41387
0.0321565	0.307747	0.349252
0.0867319	0.307357	0.25446
0.127424	0.273721	0.223073
0.174798	0.241453	0.257688
0.205176	0.259175	0.298756
0.201165	0.330391	0.312461
0.19671	0.431631	0.288667
0.199581	0.521464	0.246455
0.177126	0.54696	0.247659
0.138326	0.49146	0.298306
0.137603	0.391674	0.308498
0.184117	0.295285	0.238901
0.255776	0.234827	0.173493
0.335283	0.231202	0.176698
0.364059	0.272826	0.227516
0.285945	0.319779	0.282718
0.145297	0.345991	0.29996
0.0335749	0.350342	0.256437
-0.0368304	0.332485	0.217581
-0.0809395	0.302633	0.268094
-0.0793464	0.273902	0.366784
-0.0365341	0.25755	0.399923
0.0176623	0.265693	0.352345
0.0694807	0.307994	0.298163
0.105649	0.377391	0.303278
0.0999576	0.442183	0.377568
0.0649028	0.467063	0.465895
0.0319993	0.451752	0.472516
-0.00376342	0.429206	0.384514
-0.0327187	0.417016	0.305779
-0.0114858	0.401014	0.304837
0.0670914	0.363149	0.327566
0.15045	0.3127	0.304948
0.197128	0.272858	0.235912
0.210434	0.270845	0.169087
0.19121	0.304661	0.166474
0.150692	0.325497	0.2367
0.121661	0.294201	0.292889
0.105629	0.234404	0.249216
0.0662724	0.193186	0.135535
-0.00436709	0.181079	0.0364824
-0.0691063	0.195317	-0.000469348
-0.110326	0.249616	0.0260386
-0.123034	0.317239	0.0847108
-0.0820856	0.352067	0.117849
0.00931118	0.344184	0.11409
0.0983127	0.30965	0.127953
0.144382	0.260235	0.184695
0.143596	0.227191	0.225637
0.0921861	0.228714	0.209593
0.0119022	0.238803	0.169658
-0.0368444	0.250538	0.150274
-0.0308547	0.293394	0.164838
-0.00624666	0.360501	0.221114
0.0122062	0.402958	0.281015
0.0279373	0.407393	0.2814
0.011836	0.375369	0.233235
-0.0383594	0.3101	0.217152
-0.0606086	0.24895	0.250463
-0.0418063	0.229191	0.268122
-0.0392959	0.228481	0.233486
-0.0687532	0.207766	0.161918
-0.0841603	0.185095	0.0941123
-0.0775036	0.202083	0.0792133
-0.0553364	0.263445	0.125207
-0.00231813	0.350414	0.149637
0.0485156	0.426328	0.0901928
0.0468581	0.454675	0.0207852
0.0228922	0.43232	0.0397395
0.0498423	0.386357	0.127743
0.126658	0.325631	0.218656
0.201833	0.254696	0.274317
0.236779	0.198016	0.262219
0.186988	0.174399	0.18702
0.0517323	0.182623	0.126985
-0.0721582	0.218112	0.114455
-0.101448	0.260932	0.0976744
-0.0674262	0.272448	0.0541857
-0.0318622	0.238317	0.0265664
-0.019488	0.188074	0.0299217
-0.0460584	0.170518	0.0511725
-0.0916302	0.209136	0.0831423
-0.0983061	0.277718	0.0912919
-0.0543642	0.323935	0.0408009
-0.0109004	0.316921	-0.0242061
0.00688698	0.266248	-0.0274234
0.0150138	0.212108	0.032155
0.022519	0.185703	0.105404
0.0485255	0.183066	0.164237
0.107705	0.192989	0.192407
0.169568	0.219604	0.191093
0.191726	0.263944	0.194526
0.179768	0.318587	0.197018
0.161326	0.385143	0.145338
0.123059	0.467286	0.0496608
0.0571261	0.532406	0.000995461
-0.0038199	0.544677	0.0451155
-0.0432379	0.502121	0.13792
-0.0674719	0.427369	0.20455
-0.0574223	0.340843	0.200497
0.0127656	0.272025	0.141245
0.110063	0.245349	0.106994
0.176917	0.238266	0.142383
0.192653	0.217999	0.189393
0.16616	0.181934	0.169356
0.125479	0.142764	0.102005
0.112415	0.122177	0.0606078
0.133857	0.165238	0.0790159
0.13061	0.267939	0.137939
0.0700121	0.355295	0.185305
-0.00209531	0.376961	0.158284
-0.0414364	0.347128	0.0673404
-0.0450229	0.298502	0.01547
-0.0103338	0.254879	0.0466559
0.0654715	0.230921	0.0884381
0.136196	0.227404	0.0700407
0.170083	0.234867	0.00454848
0.193423	0.267899	-0.0516273
0.220317	0.324708	-0.0405372
0.245784	0.359758	0.0640194
0.279121	0.330531	0.191501
0.304974	0.260658	0.226671
0.256975	0.204401	0.169043
0.13869	0.180482	0.126562
0.0455583	0.168352	0.155731
0.00960831	0.138012	0.20958
-0.0169524	0.0823356	0.236119
-0.0367288	0.0407977	0.201256
-0.0148349	0.0644907	0.102128
0.0344804	0.158623	0.0109722
0.0740248	0.284819	0.00254925
0.0887819	0.386416	0.0350861
0.060009	0.416747	0.0314074
-0.00906433	0.379648	-0.000565502
-0.0603909	0.331045	-0.0241348
-0.0532723	0.313538	-0.0315394
-0.0176435	0.31127	-0.0133293
0.0152012	0.282084	0.0243537
0.0356215	0.222176	0.0343019
0.0220333	0.166515	0.0145899
-0.0082617	0.147561	0.038022
0.00418715	0.155112	0.128582
0.0699585	0.154008	0.220849
0.133223	0.118371	0.264503
0.155349	0.0581932	0.260016
0.14216	0.0200442	0.226794
0.103698	0.0372313	0.203007
0.0660794	0.0818548	0.218268
0.0509509	0.117922	0.228785
0.0216103	0.145139	0.187922
-0.0620583	0.181655	0.139403
-0.158298	0.230044	0.145357
-0.188255	0.276041	0.189523
-0.147271	0.29607	0.230387
-0.0846597	0.27182	0.239165
-0.03892	0.236691	0.19886
-0.0375511	0.243071	0.128846
-0.0666937	0.283956	0.0821384
-0.0712177	0.302085	0.0644665
-0.029848	0.282417	0.0376611
0.0126952	0.255397	0.00269346
0.0302408	0.240171	-0.00373562
0.0461805	0.243764	0.0254734
0.0634941	0.268994	0.0693982
0.0691023	0.295355	0.103607
0.0745987	0.308599	0.0834517
0.0890502	0.327206	-0.00617804
0.0749931	0.358467	-0.0915575
0.0159619	0.372618	-0.0906921
-0.0485069	0.361172	-0.0332731
-0.0926671	0.322999	0.00334476
-0.11281	0.247207	0.00662434
-0.0962688	0.146249	0.00314505
-0.0556062	0.0705429	0.0120541
-0.053316	0.0471481	0.0558681
-0.0997854	0.055671	0.122767
-0.124271	0.0840097	0.151513
-0.0992826	0.133067	0.114346
-0.0561222	0.19992	0.0734987
-0.0203743	0.275402	0.0697128
-0.012386	0.3367	0.0673023
-0.0522049	0.350271	0.0415492
-0.115191	0.318493	0.0159417
-0.151526	0.285387	0.00874983
-0.168023	0.275808	0.0414566
-0.181384	0.263156	0.14474
-0.158386	0.221468	0.266158
-0.0846704	0.156995	0.303053
-0.00991213	0.100913	0.254416
0.0290548	0.088548	0.206394
0.0450485	0.137536	0.191076
0.0372814	0.226895	0.193033
0.00334316	0.32205	0.202547
-0.0233746	0.39587	0.192332
-0.0199935	0.432974	0.154897
0.00475807	0.424574	0.152176
0.0467819	0.368708	0.220808
0.0903475	0.280566	0.298392
0.0935289	0.199532	0.312817
0.0593565	0.165608	0.27277
0.0423858	0.19525	0.216923
0.0541383	0.267121	0.182223
0.0571603	0.328717	0.193095
0.0310739	0.330241	0.21792
-0.0123619	0.27897	0.186301
-0.0672019	0.223856	0.103707
-0.114673	0.192804	0.0496642
-0.118655	0.198335	0.0579148
-0.0954673	0.249114	0.0903352
-0.0989785	0.324231	0.108281
-0.143561	0.381001	0.0923166
-0.188242	0.40449	0.057704
-0.187532	0.408275	0.0656494
-0.112441	0.399293	0.139922
0.0244454	0.376139	0.215205
0.126936	0.339522	0.22258
0.116046	0.275276	0.183504
0.0347397	0.187159	0.155362
-0.0203113	0.116706	0.166244
-0.0176627	0.0875045	0.205531
0.0155259	0.0642588	0.226201
0.0406945	0.0446422	0.179483
0.0139016	0.0696594	0.0952842
-0.0572684	0.139109	0.0586945
-0.0971794	0.204406	0.0808714
-0.0603848	0.23087	0.0863776
-0.00863695	0.196934	0.0454965
-0.0050015	0.10429	-0.000144742
-0.0289423	0.0184916	-0.00597643
-0.0550452	-0.0112744	0.0395049
-0.0723888	-0.0130109	0.118137
-0.0555388	-0.0268412	0.154254
-0.00898271	-0.0484616	0.0911195
0.0124975	-0.0494737	-0.0075004
-0.00581359	-0.00475231	-0.0400645
-0.025044	0.0918552	-0.00512161
-0.0531554	0.199821	0.0344342
-0.10681	0.247915	0.0600021
-0.146248	0.218309	0.0748359
-0.141359	0.155176	0.0776947
-0.112729	0.103489	0.0945116
-0.0732471	0.0752339	0.130031
-0.0256628	0.0729898	0.127017
-0.010457	0.0841793	0.067001
-0.0462343	0.0986587	0.0148299
-0.0852002	0.12124	-0.00523898
-0.0957486	0.148521	-0.0366828
-0.0936624	0.153769	-0.0813492
-0.0781201	0.132972	-0.103
-0.046122	0.123599	-0.0911585
-0.0332327	0.166721	-0.0339652
-0.0438742	0.274632	0.0929556
-0.0310117	0.407972	0.243974
0.00572323	0.487129	0.344415
0.0195701	0.452307	0.379565
-0.00312206	0.321038	0.368888
-0.0384719	0.177356	0.322878
-0.0653259	0.0908499	0.27863
-0.0600151	0.0537149	0.268074
-0.0286472	0.0341965	0.257729
-0.0266146	0.0341629	0.216222
-0.0657859	0.0741168	0.188925
-0.0836692	0.14718	0.213505
-0.0365945	0.221414	0.251678
0.0380546	0.26022	0.259818
0.0822845	0.241658	0.235701
0.0884514	0.184105	0.199687
0.0783755	0.125082	0.186695
0.0804765	0.0719781	0.220643
0.108892	0.0252547	0.256881
0.132146	-0.00143407	0.230084
0.108137	0.0109199	0.147941
0.0616409	0.0509845	0.0679715
0.0633971	0.0984692	0.017107
0.116747	0.136883	0.00241438
0.15879	0.144443	0.0153737
0.146928	0.117975	0.0143273
0.0866097	0.0954904	-0.0233696
0.0111414	0.104249	-0.0500681
-0.0287331	0.118182	-0.0295848
-0.00610271	0.122232	0.000919953
0.0267904	0.129948	0.00248778
0.0100916	0.14017	0.00293114
-0.036459	0.151835	0.0312516
-0.0683766	0.184341	0.0745131
-0.0922204	0.225569	0.102457
-0.118219	0.225329	0.0800579
-0.123848	0.171705	0.0028755
-0.12152	0.0969755	-0.0590549
-0.123811	0.0283202	-0.0298684
-0.0899967	-0.00488472	0.0605355
0.00168979	0.0138112	0.1256
0.103578	0.0618255	0.138456
0.175272	0.0970492	0.115692
0.216151	0.111483	0.0732108
0.206806	0.110506	0.0484808
0.155877	0.0948298	0.0737095
0.132865	0.0755216	0.105941
0.157619	0.06768	0.0850656
0.168937	0.0691553	0.0490994
0.141049	0.0865978	0.0640641
0.107576	0.139252	0.111441
0.0833388	0.20312	0.125239
0.0723312	0.218508	0.0870316
0.0864841	0.166537	0.00826166
0.0928048	0.0889376	-0.0701743
0.0558486	0.0355647	-0.0810299
0.014909	0.028333	-0.0314653
0.0143628	0.0518292	-0.0244143
0.00967798	0.0714919	-0.105766
-0.0353184	0.0836509	-0.196273
-0.0778364	0.12565	-0.216205
-0.0708651	0.214864	-0.15815
-0.00177442	0.312932	-0.0534417
0.108957	0.356054	0.0353681
0.184225	0.322459	0.056739
0.1528	0.251296	0.0421823
0.0564367	0.200714	0.0536954
-0.00937781	0.202738	0.0739346
-0.0332845	0.242501	0.0442503
-0.0559376	0.264939	-0.0283429
-0.091998	0.253636	-0.094733
-0.131912	0.248743	-0.120645
-0.150454	0.26932	-0.0876429
-0.113305	0.274508	-0.0174294
-0.0139479	0.243582	0.0316705
0.089454	0.205197	0.0587578
0.148733	0.200193	0.110478
0.180847	0.250735	0.1717
0.209895	0.335703	0.177412
0.231964	0.385718	0.121409
0.235727	0.346046	0.0348529
0.206263	0.248707	-0.062094
0.118462	0.161494	-0.132277
0.00204105	0.103168	-0.143614
-0.0596251	0.0497432	-0.137014
-0.0384579	-0.00180544	-0.170186
0.00850583	-0.0268032	-0.227643
0.0303044	0.00193782	-0.258958
0.0298491	0.105623	-0.246011
0.0146638	0.245253	-0.198871
-0.00127492	0.322233	-0.148256
0.0086418	0.302081	-0.142999
0.0359699	0.244218	-0.177702
0.0511626	0.232325	-0.170757
0.0761789	0.29164	-0.0883342
0.154342	0.389222	0.00351556
0.239021	0.453027	0.0472689
0.254752	0.445401	0.0466832
0.205844	0.410895	0.0156197
0.132102	0.40134	-0.0329209
0.0618444	0.394799	-0.0579402
0.0310898	0.331019	-0.0509656
0.0453701	0.198251	-0.0515542
0.0415105	0.0548234	-0.0669995
-0.00790561	-0.025255	-0.0597976
-0.0440658	-0.0141605	-0.0320535
-0.0286508	0.049789	-0.0234273
0.0307462	0.0951159	-0.0360928
0.127074	0.0992889	-0.0525538
0.227797	0.108637	-0.0733553
0.269471	0.162362	-0.0746724
0.246331	0.230717	-0.0308815
0.206882	0.251544	-0.00330447
0.157649	0.19235	-0.0656937
0.071435	0.0936726	-0.174506
-0.0306112	0.0308475	-0.241927
-0.0976875	0.0308429	-0.23881
-0.118761	0.039885	-0.182595
-0.101981	0.0104853	-0.119928
-0.0581959	-0.0280058	-0.119792
-0.0287643	-0.00380461	-0.17803
-0.0312735	0.100919	-0.193256
-0.0264006	0.223541	-0.120111
0.0105706	0.287076	-0.0283485
0.0625626	0.287601	0.00354559
0.125009	0.275597	-0.0397047
0.198181	0.298344	-0.125458
0.235813	0.34003	-0.185671
0.208805	0.32079	-0.172244
0.147106	0.215204	-0.119742
0.0770568	0.104086	-0.094607
0.00520357	0.0778274	-0.0992725
-0.0471583	0.134514	-0.101962
-0.0476119	0.205551	-0.0974408
-0.00122266	0.21814	-0.0771119
0.0745305	0.150232	-0.0415222
0.17903	0.0703911	-0.0332851
0.283062	0.069222	-0.0745067
0.338137	0.14088	-0.122275
0.33174	0.202644	-0.147541
0.27499	0.208331	-0.183468
0.15683	0.185915	-0.249512
0.0133316	0.177838	-0.311376
-0.0591548	0.210671	-0.334009
-0.024244	0.262823	-0.305725
0.0608455	0.271472	-0.233327
0.133998	0.195281	-0.161509
0.16743	0.090591	-0.131818
0.136177	0.0338192	-0.116779
0.0620892	0.0346939	-0.0704507
0.00927043	0.062663	-0.0261608
-0.0105497	0.0891015	-0.0579554
-0.035712	0.108494	-0.154601
-0.0765917	0.153968	-0.252248
-0.104087	0.248469	-0.303759
-0.119909	0.331791	-0.275392
-0.135276	0.320273	-0.174506
-0.121953	0.22212	-0.0875076
-0.0825003	0.112955	-0.0824971
-0.0526973	0.0536125	-0.111687
-0.0321505	0.0550894	-0.104867
-0.00140172	0.0758937	-0.0669901
0.0128304	0.0657567	-0.0278102
-0.00839141	0.0271141	-0.004674
-0.0387147	0.0262676	-0.0189598
-0.0669516	0.0989004	-0.0587629
-0.081766	0.193511	-0.0639028
-0.0472858	0.214689	-0.0291645
0.021857	0.140684	-0.0261992
0.0478757	0.0496333	-0.0803901
0.0072734	0.0506606	-0.142443
-0.0425518	0.159089	-0.191811
-0.0599638	0.26702	-0.237745
-0.0371326	0.265296	-0.25839
0.0214109	0.17254	-0.255699
0.0707809	0.0853686	-0.259094
0.0537037	0.0594417	-0.253582
-0.00828981	0.0594604	-0.215528
-0.0365674	0.0222682	-0.183299
-0.00580108	-0.0503002	-0.192561
0.0591726	-0.0874465	-0.219455
0.123422	-0.0351091	-0.239479
0.14528	0.0757925	-0.24193
0.119842	0.152439	-0.204653
0.0936057	0.122092	-0.153069
0.0904523	0.0213196	-0.158219
0.0652017	-0.0451086	-0.218463
-0.00599213	-0.0470527	-0.253993
-0.0709523	-0.0383945	-0.225355
-0.0752089	-0.0505477	-0.164796
-0.0188227	-0.0658897	-0.119651
0.0506582	-0.0542291	-0.124247
0.0814011	-0.00253753	-0.165657
0.0461582	0.0596157	-0.165157
-0.0146127	0.0671758	-0.0851954
-0.0205303	0.0191773	-0.00675528
0.0311551	-0.00454813	-0.0258489
0.0743652	0.0683718	-0.131064
0.0935967	0.216329	-0.234138
0.132258	0.357424	-0.261213
0.20058	0.395437	-0.207808
0.27641	0.291461	-0.154555
0.347205	0.1356	-0.187914
0.376737	0.0696939	-0.279411
0.340104	0.114752	-0.302957
0.272987	0.154804	-0.217146
0.217993	0.0989726	-0.115629
0.154797	-0.0271989	-0.0917923
0.0691072	-0.122461	-0.144629
0.00819648	-0.0967635	-0.21816
-0.00696249	0.0155475	-0.249145
0.00776679	0.0801603	-0.193828
0.0537789	0.0461157	-0.0962891
0.120902	0.00320474	-0.0535809
0.146156	0.0406109	-0.0811492
0.110989	0.125543	-0.11726
0.0793419	0.158647	-0.12506
0.0745801	0.0767996	-0.11298
0.0691095	-0.0629767	-0.0963686
0.0676442	-0.128142	-0.112529
0.0748163	-0.0445404	-0.182938
0.0716507	0.108232	-0.246259
0.0871876	0.193694	-0.228835
0.1662	0.162047	-0.159855
0.259712	0.0793092	-0.121994
0.294992	0.0323555	-0.132498
0.278887	0.038208	-0.168055
0.240958	0.036963	-0.205191
0.187394	-0.0213898	-0.209674
0.144912	-0.10319	-0.168243
0.141857	-0.1194	-0.132569
0.157514	-0.0443177	-0.127411
0.168003	0.0532168	-0.0965092
0.174074	0.0958709	-0.0267569
0.160558	0.070411	0.0164391
0.109185	0.0229245	0.00213986
0.0481002	0.000658619	-0.0497222
0.0170763	0.00606493	-0.115001
0.00663178	0.00639565	-0.149892
0.00539967	-0.0176638	-0.114823
0.0121148	-0.0376948	-0.0526489
-0.0100086	-0.00317781	-0.0426047
-0.0693194	0.0908238	-0.0904305
-0.103816	0.189191	-0.140575
-0.0683675	0.224243	-0.145136
-0.00830278	0.190869	-0.0872401
0.0141966	0.142223	0.00177403
-0.0083511	0.146657	0.0519318
-0.0437393	0.194871	0.043516
-0.0444602	0.18873	0.0343103
0.00124191	0.0622012	0.0520759
0.0421949	-0.101032	0.0474388
0.0247714	-0.162959	-0.00580686
-0.0173988	-0.0958601	-0.0815994
-0.00161189	0.00485732	-0.144104
0.0703587	0.031545	-0.155254
0.118791	-0.0397219	-0.0985584
0.104021	-0.128944	-0.0333111
0.0561653	-0.136923	-0.0237507
0.0187106	-0.0602248	-0.0376221
0.0230383	0.00077841	-0.0140461
0.0747781	-0.0163894	0.0299758
0.120922	-0.0670846	0.0387415
0.118712	-0.072738	0.00160709
0.0913316	-0.00569304	-0.0566318
0.0666011	0.0829663	-0.0867291
0.0208769	0.11129	-0.0304327
-0.0507934	0.0399814	0.0905728
-0.0965521	-0.059972	0.164471
-0.0960307	-0.0962623	0.129556
-0.0709362	-0.0606322	0.0569642
-0.0267078	-0.0203173	0.0312781
0.0220789	-0.0278546	0.0562194
0.0331095	-0.0768406	0.103457
0.010694	-0.101729	0.139913
0.0146918	-0.0477682	0.133575
0.0481539	0.0506007	0.103793
0.0740305	0.0937768	0.105573
0.0954392	0.04247	0.11647
0.104406	-0.0415337	0.060096
0.0711973	-0.0742942	-0.0515589
0.0316251	-0.0370315	-0.124721
0.0465777	0.030502	-0.115173
0.0923215	0.0769473	-0.0502481
0.124069	0.0903538	0.0134641
0.144496	0.0998667	-0.00415361
0.148543	0.116557	-0.124702
0.12704	0.105183	-0.240062
0.112563	0.0448461	-0.242674
0.125042	-0.0116949	-0.164436
0.124559	0.00317799	-0.0999218
0.0922546	0.0996837	-0.0830217
0.0620644	0.217929	-0.0985916
0.0472217	0.283205	-0.105306
0.0454533	0.269499	-0.0616016
0.0665556	0.226711	-0.00803753
0.100644	0.219413	-0.0318187
0.103019	0.262324	-0.128442
0.0701566	0.297229	-0.20304
0.044055	0.272006	-0.197898
0.0333064	0.193107	-0.130703
0.0287978	0.113707	-0.0544479
0.0330595	0.0920874	-0.035762
0.0375304	0.150196	-0.100817
0.0373568	0.23024	-0.179158
0.0592003	0.234866	-0.193262
0.124686	0.145511	-0.165185
0.190631	0.0468778	-0.161129
0.20455	8.26113e-05	-0.19447
0.174441	-0.00434339	-0.236317
0.134888	0.00300102	-0.252115
0.0906782	-0.000234431	-0.214174
0.0405528	-0.00884839	-0.148016
0.00648272	0.0245173	-0.119628
-0.0146661	0.111519	-0.122866
-0.0292606	0.183659	-0.082267
-0.0125805	0.189922	0.014485
0.0226075	0.15612	0.101803
0.00887666	0.12844	0.131901
-0.0513348	0.110538	0.0979564
-0.074332	0.0968718	0.0232326
-0.0378111	0.0661871	-0.0312309
0.00670413	0.00730619	-0.0183338
0.0222428	-0.0464008	0.014332
-0.0023909	-0.046658	-0.0163946
-0.0547882	-0.00389095	-0.0968197
-0.0890525	0.0299626	-0.144769
-0.0717967	0.0383508	-0.123083
-0.0528777	0.0544555	-0.0585028
-0.0680459	0.105421	-0.000976326
-0.0613942	0.187608	-0.00859713
0.00922653	0.242072	-0.0821312
0.104207	0.2149	-0.124555
0.185031	0.137575	-0.0841659
0.245237	0.108211	-0.0402219
0.245265	0.166195	-0.0641766
0.177502	0.253471	-0.112645
0.111516	0.289687	-0.117294
0.08257	0.248242	-0.0606901
0.0663355	0.173499	0.0334597
0.0602129	0.128745	0.0986232
0.0761792	0.135084	0.0764908
0.0938744	0.145071	0.0198402
0.106812	0.112817	0.0451148
0.123656	0.0500286	0.153771
0.114979	0.0115264	0.227407
0.0676828	0.0201017	0.186887
0.022478	0.0463115	0.0484006
0.00441068	0.0435499	-0.113155
-0.0170898	0.0139108	-0.203353
-0.0540311	0.00398809	-0.188338
-0.0788385	0.0562324	-0.152712
-0.0890691	0.142792	-0.185512
-0.093712	0.193185	-0.259022
-0.079364	0.177159	-0.298013
-0.0421919	0.13852	-0.27803
-0.00748653	0.132269	-0.219962
0.015	0.154539	-0.180664
0.0427407	0.164522	-0.215244
0.0715476	0.149702	-0.289707
0.0975487	0.123838	-0.301861
0.131057	0.125175	-0.227506
0.160513	0.193085	-0.151508
0.162885	0.301117	-0.143045
0.145805	0.353815	-0.190045
0.132234	0.298934	-0.232175
0.102715	0.185117	-0.207295
0.0302094	0.0856715	-0.120988
-0.0699917	0.0457541	-0.0717418
-0.163605	0.057715	-0.125395
-0.227946	0.0670804	-0.207476
-0.232545	0.0295012	-0.213606
-0.159031	-0.012336	-0.157077
-0.0645963	-0.00477554	-0.123257
[truncated: 1,501 more rows]

## Sheet: panel_B_hundred_pulses
0.0553494	0.126795	-0.04503
0.00943736	0.111786	-0.0441036
0.0268105	0.111017	-0.113611
0.0822479	0.0879887	-0.220956
0.145018	0.0151313	-0.29108
0.209216	-0.0783701	-0.296995
0.230364	-0.117144	-0.267186
0.185758	-0.0565372	-0.221239
0.13659	0.0605637	-0.167045
0.135295	0.150417	-0.123326
0.121167	0.173581	-0.089734
0.0838152	0.164276	-0.0707555
0.0571865	0.16812	-0.0907062
0.0294914	0.194364	-0.136073
-0.00809085	0.2138	-0.139742
-0.00120127	0.183604	-0.0828079
0.0548938	0.100047	-0.0082493
0.0636699	0.0228143	0.0431904
0.0228579	0.011841	0.0531304
-0.000613123	0.0396446	0.0217433
-0.00968535	0.0407899	-0.0083908
-0.0551067	0.0117222	-0.00819494
-0.104086	-0.00750136	-0.0113714
-0.121437	0.00836897	-0.0635505
-0.140316	0.0488788	-0.139317
-0.13442	0.0562608	-0.183732
-0.0714857	-0.0128653	-0.162541
-0.0138176	-0.0894937	-0.0895959
-0.0221534	-0.063454	-0.0155144
-0.0101133	0.05814	0.00560978
0.0799298	0.162516	-0.0209051
0.180318	0.164798	-0.037736
0.23189	0.0695621	-0.00911141
0.21307	-0.0460293	0.0382506
0.107833	-0.0841811	0.0605111
-0.0248523	-0.0253358	0.0456405
-0.0405279	0.064062	0.0066863
0.0562408	0.124991	-0.0287396
0.133263	0.149094	-0.0363518
0.129727	0.143301	-0.0203309
0.0918663	0.118351	-0.0184633
0.0414292	0.075317	-0.0366512
-0.0147117	-0.00677527	-0.0462962
-0.0282543	-0.129608	-0.0281105
-0.0285129	-0.224341	0.00186674
-0.0500781	-0.222754	0.0251051
-0.0408677	-0.145791	0.0255598
0.0520335	-0.0629908	0.00839899
0.145389	-0.0228399	0.00815333
0.154071	-0.0407327	0.0509913
0.116304	-0.0869775	0.100029
0.0681157	-0.0950884	0.104065
0.0435801	-0.0439755	0.0678018
0.0732868	0.0143119	0.0377044
0.139794	0.0330722	0.0329859
0.148039	0.0135922	0.0539515
0.0864055	-0.0227711	0.0745788
0.0382609	-0.0455996	0.0507652
0.0149961	-0.0362495	-0.0132944
-0.0101383	-0.0162007	-0.054188
-0.0403619	-0.0157462	-0.044459
-0.0645403	-0.0113193	-0.0321165
-0.118362	0.045284	-0.0498429
-0.161417	0.142827	-0.0892135
-0.125112	0.208818	-0.121118
-0.0638832	0.208988	-0.108888
-0.0559926	0.17073	-0.0420648
-0.0732306	0.133299	0.0181713
-0.0541274	0.116612	0.0090997
-0.0293874	0.120167	-0.046651
-0.00230205	0.1221	-0.0792565
0.0361616	0.0881348	-0.0666594
0.0402988	0.00659552	-0.0289215
0.00865703	-0.0959829	-0.0051984
0.0169691	-0.176431	-0.0293105
0.0780824	-0.198245	-0.0898583
0.0936589	-0.149031	-0.11407
0.0527392	-0.0555053	-0.0680699
0.00662466	0.0341571	0.0075118
-0.0413675	0.11051	0.0610857
-0.0961628	0.19341	0.0868448
-0.103548	0.249788	0.0983003
-0.063403	0.227406	0.110392
-0.0456114	0.147679	0.138552
-0.0274723	0.0771709	0.17151
0.0297975	0.0397587	0.183113
0.0721725	0.0279455	0.170491
0.0522305	0.0158079	0.153475
0.0397463	-0.0223958	0.137841
0.0604591	-0.0648485	0.122478
0.0648487	-0.069499	0.113494
0.0488456	-0.055403	0.120529
0.00396921	-0.0667313	0.134644
-0.114695	-0.0887389	0.154238
-0.263358	-0.0781279	0.171742
-0.286183	-0.0299571	0.167342
-0.170844	0.0295402	0.139133
-0.0420444	0.0557243	0.125824
0.0258793	0.0214658	0.141074
0.0214364	-0.0383051	0.147697
-0.0559058	-0.0610978	0.111603
-0.145974	-0.042359	0.0503712
-0.139897	-0.0193236	0.0044779
-0.0784445	-0.00249206	0.0156364
-0.0572016	0.0149348	0.0881627
-0.0736213	0.0293385	0.160439
-0.073244	0.0467577	0.142961
-0.0622953	0.0651807	0.0257323
-0.0535054	0.048077	-0.112724
-0.0372803	-0.00870046	-0.192544
-0.064963	-0.0451306	-0.184315
-0.13231	-0.0232992	-0.116027
-0.159968	0.0147874	-0.0608264
-0.107615	0.0191544	-0.0745531
-0.04598	-0.0291021	-0.108928
-0.0114794	-0.114507	-0.0957153
0.0351633	-0.17987	-0.0416124
0.0924955	-0.159473	0.0100691
0.158896	-0.0607669	0.0447296
0.234038	0.0457351	0.0595505
0.273049	0.106481	0.0691008
0.19268	0.122314	0.100535
0.0469278	0.109076	0.14094
-0.0226918	0.0612392	0.135321
-0.0021843	-0.0280173	0.0792758
0.0454351	-0.141047	0.0170739
0.0694261	-0.244441	-0.0213533
0.0366029	-0.298231	-0.0393072
-0.0716841	-0.273674	-0.0298837
-0.154214	-0.195864	-0.000845184
-0.137012	-0.13056	0.0275462
-0.106772	-0.107904	0.0555739
-0.140436	-0.0989023	0.0967259
-0.185557	-0.0838154	0.132992
-0.177957	-0.0653414	0.133405
-0.152736	-0.0437083	0.0939692
-0.12189	-0.0270292	0.0247756
-0.0975561	-0.0412607	-0.0429706
-0.125521	-0.0810141	-0.0651153
-0.185943	-0.111778	-0.03809
-0.179659	-0.122161	-0.0197639
-0.10131	-0.120018	-0.0417153
-0.0462915	-0.100241	-0.0670735
-0.00841308	-0.0747651	-0.0411726
0.0509821	-0.0682473	0.0288269
0.0950866	-0.0669266	0.0900428
0.0984578	-0.055623	0.0940575
0.0972142	-0.061193	0.0451243
0.0615164	-0.0878391	-0.00957229
-0.0441707	-0.0943175	-0.019489
-0.126453	-0.0570504	0.00731511
-0.116326	0.00233644	0.0168735
-0.0655471	0.050713	-0.0222954
-0.0393184	0.054042	-0.0795255
-0.0251783	0.020672	-0.113114
-0.0432535	0.014698	-0.0996029
-0.0960497	0.0550905	-0.0452077
-0.106737	0.0752901	0.0116385
-0.0448626	0.0280786	0.0288596
0.0130011	-0.0531777	0.0133
0.0049103	-0.111511	-0.00567493
-0.0245161	-0.111612	-0.039147
-0.072149	-0.0558653	-0.107384
-0.141798	0.00476647	-0.191336
-0.196165	0.00923632	-0.246478
-0.22897	-0.0291795	-0.250359
-0.270791	-0.0652823	-0.200729
-0.283128	-0.0936964	-0.1411
-0.2027	-0.128215	-0.138092
-0.112632	-0.156608	-0.196221
-0.0890497	-0.174354	-0.244545
-0.110156	-0.183816	-0.237583
-0.134324	-0.17172	-0.190463
-0.152058	-0.14392	-0.13201
-0.136563	-0.141106	-0.0969285
-0.0747977	-0.179074	-0.121343
-0.0512806	-0.222495	-0.175543
-0.0825786	-0.227774	-0.204685
-0.101673	-0.182871	-0.204911
-0.0698421	-0.113322	-0.21092
-0.0356093	-0.0648271	-0.219173
-0.0116625	-0.0698975	-0.216157
0.0261924	-0.113551	-0.202736
0.0385054	-0.134098	-0.173926
0.0235659	-0.0827014	-0.138416
0.01139	-0.00151408	-0.130654
-0.0209732	0.0339959	-0.155524
-0.125044	0.0117391	-0.160717
-0.225342	-0.0209049	-0.121939
-0.230336	-0.020783	-0.0702175
-0.177722	0.0321363	-0.0394564
-0.121119	0.113288	-0.0395347
-0.0784022	0.157342	-0.0726011
-0.0840508	0.138884	-0.112389
-0.169997	0.104835	-0.124239
-0.248469	0.0979115	-0.110545
-0.246222	0.108433	-0.0995999
-0.221469	0.107579	-0.0861717
-0.22481	0.0833537	-0.058063
-0.21373	0.0341018	-0.0223014
-0.164709	-0.0238166	-0.00698389
-0.1232	-0.0717027	-0.0340325
-0.0826427	-0.122613	-0.107456
-0.0602551	-0.196522	-0.18784
-0.112731	-0.257491	-0.214731
-0.199705	-0.257039	-0.166071
-0.196579	-0.19914	-0.0942797
-0.111666	-0.120977	-0.0664084
-0.0505988	-0.066705	-0.0932148
-0.024757	-0.0661432	-0.132478
-0.0103054	-0.091894	-0.146936
-0.00306855	-0.094806	-0.134547
0.00604385	-0.0867466	-0.122312
0.0306325	-0.0985245	-0.143353
-0.000904389	-0.112979	-0.177984
-0.120699	-0.101201	-0.174455
-0.218998	-0.071451	-0.128448
-0.209587	-0.0409294	-0.099009
-0.129348	-0.0273926	-0.118354
-0.0468086	-0.0343539	-0.168724
0.022903	-0.027848	-0.210488
0.0273813	0.033269	-0.208686
-0.0295037	0.128457	-0.158149
-0.0500942	0.208497	-0.110988
-0.0188126	0.265954	-0.116375
-0.0151212	0.311942	-0.162435
-0.0526989	0.316628	-0.212079
-0.0610096	0.257193	-0.266067
-0.054592	0.159839	-0.320386
-0.0505303	0.0577005	-0.357973
-0.0463858	-0.0273615	-0.378362
-0.0730336	-0.0640402	-0.391366
-0.137901	-0.0424876	-0.381163
-0.158037	-0.0026929	-0.354069
-0.0682866	0.0115968	-0.350812
0.037073	-0.00687344	-0.378129
0.0836984	-0.0382059	-0.404254
0.0782803	-0.0660544	-0.403614
0.0378707	-0.0833956	-0.367981
-0.0265768	-0.097638	-0.302284
-0.0569991	-0.117579	-0.254375
-0.0317417	-0.142938	-0.261891
-0.0376841	-0.154772	-0.291824
-0.0774039	-0.1394	-0.283648
-0.0654913	-0.115331	-0.23777
0.0116258	-0.0986694	-0.19526
0.0798547	-0.0769115	-0.183431
0.116242	-0.0629159	-0.203596
0.117574	-0.0879066	-0.233825
0.0604951	-0.135142	-0.220066
0.0109886	-0.15259	-0.154959
0.04098	-0.131152	-0.103804
0.0997297	-0.0939393	-0.125523
0.0781863	-0.0573284	-0.187328
0.00618857	-0.0421604	-0.219278
-0.0469534	-0.0618617	-0.194503
-0.0874249	-0.0876334	-0.145093
-0.109202	-0.0914877	-0.124641
-0.0807689	-0.0864998	-0.161731
-0.0396467	-0.0831294	-0.22519
-0.046723	-0.0688747	-0.256487
-0.0504618	-0.0421199	-0.240907
-0.0281645	-0.0169981	-0.214872
-0.0411059	-0.00826641	-0.207794
-0.094404	-0.0480434	-0.210433
-0.12174	-0.148004	-0.207472
-0.119808	-0.243497	-0.18333
-0.114136	-0.264697	-0.134548
-0.0760328	-0.22436	-0.0865339
-0.0339201	-0.174793	-0.0717202
-0.0348866	-0.152591	-0.0785884
-0.0407274	-0.171111	-0.0807401
0.0251116	-0.215096	-0.0727241
0.123138	-0.252153	-0.0642363
0.172765	-0.286497	-0.0627575
0.180314	-0.327194	-0.0843619
0.151365	-0.335248	-0.121156
0.0986544	-0.280145	-0.138398
0.0801334	-0.207419	-0.121034
0.146505	-0.166675	-0.10697
0.209939	-0.163022	-0.11616
0.194912	-0.185674	-0.126638
0.143999	-0.217942	-0.116423
0.0941391	-0.227252	-0.0882913
0.0530351	-0.207199	-0.0549239
0.037909	-0.189503	-0.0532669
0.0562103	-0.176708	-0.116925
0.0314766	-0.141543	-0.196918
-0.0368224	-0.0940426	-0.218592
-0.0717706	-0.0756341	-0.183296
-0.0657404	-0.0977864	-0.153602
-0.0642373	-0.147154	-0.164482
-0.0743697	-0.202662	-0.215525
-0.0659768	-0.240898	-0.269775
-0.064221	-0.245545	-0.274141
-0.0456678	-0.233978	-0.227669
0.0233287	-0.238072	-0.187258
0.0873133	-0.259103	-0.170968
0.0909864	-0.261558	-0.140247
0.0861573	-0.223066	-0.0732345
0.119867	-0.160508	-0.00094626
0.108011	-0.113546	0.0470952
0.0324521	-0.110091	0.0510632
-0.0424381	-0.157111	0.0159484
-0.0902047	-0.216009	-0.0233323
-0.110885	-0.232587	-0.0229881
-0.0631866	-0.207484	0.0079986
0.0296535	-0.179161	0.0219546
0.0634899	-0.154319	0.00227933
0.0422138	-0.119796	-0.0256343
0.0332501	-0.0913593	-0.031145
0.042607	-0.0879256	-0.00337708
0.0405586	-0.110328	0.0401661
0.059201	-0.163239	0.0634214
0.096322	-0.233786	0.0599538
0.0966661	-0.264527	0.0632249
0.0841311	-0.218628	0.0989678
0.102149	-0.132217	0.13664
0.0993604	-0.0594854	0.134312
0.0318706	-0.0288852	0.0849887
-0.00739856	-0.0511231	0.0224338
0.023853	-0.103582	-0.0151922
0.0558809	-0.142078	-0.00401381
0.0530674	-0.143043	0.0287196
0.0290954	-0.117699	0.0182185
-0.0266028	-0.0719835	-0.0518883
-0.0938694	-0.0304986	-0.112158
-0.0854097	-0.0234765	-0.11065
-0.0168074	-0.033227	-0.0641638
0.0451175	-0.0285203	-0.0248011
0.0856499	-0.0194147	-0.0280785
0.121833	-0.0113902	-0.063064
0.11752	0.0100764	-0.0782415
0.0585894	0.0320473	-0.0630217
0.011035	0.0218902	-0.056212
-0.014431	-0.0132717	-0.0702216
-0.0306936	-0.0519663	-0.0667875
-0.018619	-0.0902864	-0.0215178
0.0398193	-0.116747	0.0316606
0.0783546	-0.120892	0.0579558
0.0735474	-0.12197	0.0325297
0.0774506	-0.140747	-0.053415
0.072277	-0.15422	-0.159284
0.0357822	-0.13998	-0.201924
0.0119584	-0.111307	-0.159871
0.0447455	-0.0907735	-0.0932146
0.0827335	-0.0897652	-0.0510179
0.110449	-0.130518	-0.0413567
0.156558	-0.212086	-0.0657388
0.181441	-0.281757	-0.0936527
0.152689	-0.291747	-0.0928375
0.100378	-0.257393	-0.0794616
0.0703267	-0.2133	-0.0908749
0.0325275	-0.177606	-0.114019
0.00159048	-0.152178	-0.124495
0.0111978	-0.137386	-0.118
0.0223542	-0.118276	-0.0952875
-0.00137163	-0.0856085	-0.0566933
-0.020695	-0.0647805	-0.0214349
-0.0173074	-0.0828768	-0.00112174
-0.0583361	-0.11866	0.0218684
-0.123506	-0.125564	0.0473866
-0.154729	-0.102209	0.0386647
-0.17324	-0.0733527	-0.0229814
-0.202379	-0.0520288	-0.102561
-0.186592	-0.0547546	-0.153934
-0.116885	-0.0833838	-0.150617
-0.0753713	-0.105977	-0.096049
-0.066961	-0.10926	-0.0289227
-0.0539283	-0.115328	0.00938945
-0.0560503	-0.133436	0.0361394
-0.0990429	-0.160004	0.089674
-0.135408	-0.206557	0.161119
-0.158242	-0.261433	0.194273
-0.222271	-0.288142	0.156061
-0.27832	-0.280288	0.0641468
-0.244757	-0.268205	-0.0257129
-0.151826	-0.258933	-0.0612147
-0.0684075	-0.251136	-0.0248402
0.0283252	-0.259638	0.0421194
0.113751	-0.284196	0.086988
0.12969	-0.301767	0.0958783
0.108042	-0.301648	0.0869998
0.0900002	-0.276245	0.0618324
0.0362512	-0.218083	0.0217046
-0.0687383	-0.153211	-0.0139969
-0.15074	-0.124941	-0.0265945
-0.203842	-0.126426	0.00274684
-0.24407	-0.138325	0.0850435
-0.234723	-0.164814	0.184946
-0.159017	-0.189957	0.231074
-0.0846231	-0.183558	0.205742
-0.0502552	-0.149727	0.14903
-0.0117509	-0.10502	0.101856
0.00280926	-0.0484693	0.0793411
-0.0424476	-0.0130435	0.0831387
-0.102715	-0.0394154	0.0876833
-0.121279	-0.103801	0.0633919
-0.11892	-0.151028	0.0322553
-0.0998119	-0.172629	0.0383079
-0.0408784	-0.184163	0.0680026
-0.0125189	-0.186845	0.0848518
-0.0408366	-0.180934	0.0766306
-0.0629385	-0.178706	0.0496432
-0.0310824	-0.17219	0.0167464
0.00100883	-0.147611	0.0224526
0.0107994	-0.118592	0.066497
0.0149961	-0.125421	0.0863665
-0.0164762	-0.184528	0.0558091
-0.0647037	-0.279494	0.0232729
-0.0770367	-0.37218	0.0317943
-0.0605662	-0.409773	0.0788644
-0.0913055	-0.360893	0.147511
-0.137459	-0.252344	0.201719
-0.117564	-0.160402	0.215237
-0.0646528	-0.14149	0.210605
-0.0306216	-0.196047	0.223175
-0.00161139	-0.291001	0.231866
0.0322884	-0.369639	0.194533
0.0258031	-0.364263	0.119163
0.0013615	-0.264462	0.0490632
-0.0246428	-0.140725	0.0125635
-0.106972	-0.0563785	0.0185681
-0.230348	-0.0196379	0.0369273
-0.278547	-0.042771	0.0167156
-0.207046	-0.124649	-0.0524386
-0.113658	-0.209386	-0.113927
-0.0465799	-0.241947	-0.126763
-0.013597	-0.222044	-0.0998607
-0.0414249	-0.176453	-0.0598647
-0.111701	-0.152951	-0.0238305
-0.13021	-0.186704	-0.0101163
-0.0827191	-0.238008	-0.0232712
-0.0430814	-0.235092	-0.0509352
-0.0112079	-0.172537	-0.0741664
0.0376321	-0.098495	-0.0862607
0.0687887	-0.0445044	-0.084644
0.0617889	-0.0147291	-0.0680661
0.0674291	0.000782828	-0.0459469
0.070417	0.0202089	-0.0151506
0.033259	0.02878	0.0370346
0.00383585	-0.0110479	0.090687
0.0133301	-0.0862383	0.100606
0.0232137	-0.132853	0.0734659
0.0208251	-0.122674	0.0471793
0.0617125	-0.0863717	0.0264965
0.115712	-0.0612009	-0.00514018
0.13048	-0.083332	-0.0429139
0.127468	-0.167111	-0.0713952
0.12302	-0.260616	-0.0701579
0.0862942	-0.288879	-0.0265679
0.0172929	-0.241459	0.0340704
-0.0206902	-0.147342	0.053733
-0.0512699	-0.0447743	0.0277917
-0.0983472	0.0171949	-0.00120912
-0.124762	0.0123694	-0.0101466
-0.102676	-0.0229428	-0.0232108
-0.0627983	-0.0533285	-0.0504062
-0.00871345	-0.0831365	-0.0889546
0.0665883	-0.115536	-0.138804
0.0831969	-0.118942	-0.168825
0.0298352	-0.0747937	-0.140911
-0.0142414	-0.0109123	-0.072378
-0.00697662	0.0293701	-0.0149594
0.00388109	0.0232659	0.0135327
0.00892405	-0.0264351	0.0118403
0.029503	-0.102314	-0.00529299
0.021938	-0.166213	0.00561233
-0.00830557	-0.189172	0.0653743
-0.00600969	-0.180823	0.134268
0.0252062	-0.166027	0.169222
0.0140591	-0.152755	0.170694
-0.0236179	-0.145694	0.155125
-0.0274932	-0.149737	0.128779
-0.0203298	-0.159486	0.107798
-0.00354317	-0.167285	0.107292
0.053256	-0.198078	0.127877
0.116015	-0.26316	0.150603
0.103125	-0.321661	0.165739
0.0626114	-0.335684	0.153355
0.0590138	-0.319684	0.0994098
0.0590416	-0.296497	0.0276131
0.0468714	-0.274865	-0.0165628
0.0513142	-0.267187	-0.0169624
0.0424865	-0.268304	0.0167782
-0.032852	-0.246603	0.0621019
-0.104822	-0.209096	0.0850459
-0.111755	-0.188371	0.0712503
-0.0955489	-0.172605	0.042473
-0.0908305	-0.13106	0.0240737
-0.072477	-0.0735922	0.00949137
-0.0607666	-0.0243048	-0.016577
-0.0869051	-0.00305723	-0.0439791
-0.0843303	-0.0164777	-0.0501166
-0.026468	-0.0361325	-0.0360007
0.0282376	-0.031402	-0.0101914
0.0592546	-0.0290915	0.01898
0.116461	-0.0781043	0.0391226
0.165479	-0.161574	0.0519691
0.15102	-0.224191	0.0835716
0.112031	-0.245661	0.119773
0.0717072	-0.243457	0.117086
0.0250363	-0.245266	0.0680931
-0.0151634	-0.272553	0.0032034
-0.0216653	-0.303588	-0.0591656
-0.0540241	-0.297973	-0.103286
-0.133612	-0.259671	-0.128502
-0.186892	-0.226712	-0.151612
-0.182039	-0.189816	-0.177392
-0.169282	-0.133919	-0.17988
-0.183255	-0.0961016	-0.158523
-0.183558	-0.109313	-0.153468
-0.166758	-0.155156	-0.17515
-0.124101	-0.205867	-0.192362
-0.0447235	-0.232972	-0.186099
0.00574161	-0.2091	-0.168447
-0.0498582	-0.148714	-0.143215
-0.159584	-0.11027	-0.121016
-0.19414	-0.130276	-0.116207
-0.156958	-0.18999	-0.107813
-0.0979713	-0.249006	-0.0654928
-0.0458279	-0.278725	-0.00467977
-0.0308884	-0.268183	0.0499314
-0.0670522	-0.228682	0.0940737
-0.103065	-0.196269	0.115794
-0.0987772	-0.19621	0.098178
-0.121848	-0.211634	0.071617
-0.173748	-0.205988	0.0714751
-0.179947	-0.184944	0.0925845
-0.11757	-0.165354	0.104416
-0.0456695	-0.148162	0.0964075
0.0221121	-0.12737	0.0645236
0.0719217	-0.0996948	0.0258199
0.0264871	-0.059961	0.0205747
-0.0818645	-0.0247214	0.0610616
-0.128423	-0.0327796	0.101608
-0.0812709	-0.0787289	0.0963837
-0.0222577	-0.095341	0.0501458
0.0191568	-0.0455804	-0.00877938
0.0168419	0.0303193	-0.0547361
-0.0786171	0.0753762	-0.063077
-0.205389	0.071974	-0.026132
-0.260781	0.0328828	0.038828
-0.256979	-0.00992542	0.117906
-0.266612	-0.0427589	0.199515
-0.251256	-0.0913524	0.262569
-0.167622	-0.16329	0.283719
-0.0550747	-0.199878	0.271015
0.0525183	-0.149619	0.243748
0.143139	-0.0419837	0.208844
0.162366	0.0585797	0.164293
0.0920351	0.100092	0.119955
0.0527106	0.0724052	0.0814992
0.089569	0.0213524	0.0594691
0.115611	-0.00878549	0.0775301
0.0708009	-0.0385942	0.148537
-0.0012676	-0.100719	0.229678
-0.0772827	-0.172929	0.272983
-0.133342	-0.207177	0.261103
-0.115769	-0.183653	0.194285
-0.0685329	-0.10402	0.0921801
-0.0654002	-0.0111217	0.0123765
-0.0932613	0.0309161	-0.00471677
-0.0855013	0.0153082	0.021136
-0.0608249	0.00587302	0.0586312
-0.0414696	0.033146	0.0881349
0.000793927	0.0618844	0.099433
0.0305811	0.0624261	0.108099
-0.00578106	0.0332081	0.153614
-0.0802777	-0.00680726	0.231486
-0.115443	-0.00438544	0.289304
-0.139041	0.0711631	0.303074
-0.176165	0.163482	0.291684
-0.187274	0.196786	0.254952
-0.172566	0.168145	0.184953
-0.154604	0.129266	0.104539
-0.123667	0.125109	0.0462769
-0.0625583	0.161176	0.0166397
-0.0209552	0.195478	0.0283525
0.032131	0.178606	0.0678772
0.147863	0.106501	0.0902006
0.262987	0.0401912	0.0809124
0.291074	0.0294928	0.0750978
0.260418	0.0519002	0.0800506
0.242563	0.0540628	0.0811192
0.223061	0.0425542	0.0904647
0.207813	0.0671044	0.112776
0.204855	0.134352	0.119181
0.154062	0.198979	0.0875159
0.0140015	0.211883	0.0301562
-0.126809	0.148042	-0.0374007
-0.170513	0.0433531	-0.101941
-0.135549	-0.0206494	-0.142624
-0.0347399	-0.0108564	-0.145651
0.113264	0.0125417	-0.130115
0.222114	-0.00510868	-0.123041
0.230164	-0.0320855	-0.135405
0.21043	-0.00814905	-0.162418
0.206159	0.0694924	-0.184638
0.161238	0.141171	-0.163615
0.0871353	0.127472	-0.0977512
0.0444728	0.000848725	-0.0282475
0.0349724	-0.152502	0.0101814
0.0188372	-0.226097	0.0163943
0.0150727	-0.216612	-0.0105599
0.0107751	-0.194719	-0.0618054
-0.0281658	-0.198867	-0.109871
-0.0541949	-0.218241	-0.131193
0.00191293	-0.212413	-0.136276
0.0936633	-0.140424	-0.129032
0.126881	-0.0233859	-0.0957188
0.108195	0.0647312	-0.0447075
0.0465019	0.0900839	-0.0123008
-0.0525799	0.0712603	-0.0152294
-0.112244	0.0375133	-0.0470786
-0.0605323	0.0115038	-0.1003
0.032873	0.00199684	-0.14682
0.070933	-0.0210903	-0.163218
0.0749996	-0.0732649	-0.160211
0.061454	-0.104449	-0.151913
0.0340013	-0.0776759	-0.128623
0.0202868	-0.0443272	-0.096543
0.0395683	-0.0602548	-0.0642643
0.0407019	-0.123194	-0.00990607
0.0131229	-0.206092	0.0738705
0.0273785	-0.269857	0.131903
0.0707337	-0.278723	0.115451
0.0888717	-0.250431	0.0466261
0.0803156	-0.234149	-0.0109156
0.0897201	-0.227134	-0.026582
0.0966615	-0.189473	0.00343255
0.121504	-0.11828	0.0471744
0.210896	-0.0612166	0.0559832
0.297998	-0.0543469	0.0194966
0.302169	-0.0986566	-0.0187272
0.250752	-0.148498	-0.0289531
0.216083	-0.145597	-0.0220964
0.188559	-0.0732617	-0.00493946
0.188237	0.0111489	0.0143132
0.23809	0.0299393	0.027169
0.272669	-0.0206901	0.0543684
0.248748	-0.0686807	0.116625
0.206225	-0.0741406	0.175
0.172438	-0.0630045	0.165486
0.0971878	-0.0736985	0.0860364
0.0214287	-0.114174	0.000905392
0.0219571	-0.16667	-0.0346083
0.068131	-0.188047	-0.0123759
0.0882123	-0.154149	0.034942
0.0769347	-0.115601	0.0586882
0.0395028	-0.131098	0.0270978
-0.0456442	-0.179948	-0.0356492
-0.0949534	-0.196901	-0.0982609
-0.0457927	-0.161231	-0.15203
0.0262002	-0.0941796	-0.189157
0.0296405	-0.0405076	-0.17994
-0.00150407	-0.0512196	-0.128002
-0.0255395	-0.118462	-0.0681695
-0.0481759	-0.160471	-0.0179273
-0.0273855	-0.138154	0.0146612
0.0539182	-0.0995692	0.0121065
0.123786	-0.0846274	-0.0193296
0.125596	-0.0803849	-0.0441361
0.106352	-0.0606927	-0.0394248
0.0864644	0.000921452	-0.0175829
0.0430314	0.097049	-0.00412022
0.0145751	0.167447	-0.0212081
0.0377328	0.164968	-0.0737186
0.0592775	0.110831	-0.115993
0.0262024	0.0400989	-0.109364
-0.0144186	-0.0240681	-0.0836388
-0.0587896	-0.0524494	-0.0896622
-0.129528	-0.0477322	-0.118813
-0.177535	-0.0528604	-0.140302
-0.152399	-0.0714058	-0.149163
-0.0899395	-0.0738615	-0.143024
-0.0375567	-0.0699906	-0.121367
0.0174219	-0.0919639	-0.110288
0.0275256	-0.128787	-0.108335
-0.0266445	-0.145514	-0.0865479
-0.0751458	-0.128462	-0.0383454
-0.0509539	-0.0820013	0.00892689
0.0101198	-0.0361392	0.0456087
0.0675225	-0.0330954	0.0642644
0.132582	-0.0688458	0.0522981
0.169467	-0.0864554	0.0253966
0.158289	-0.069774	0.0133061
0.131464	-0.0607873	0.0072972
0.116818	-0.0870885	-0.0201802
0.0834854	-0.129879	-0.0454088
0.0583208	-0.161981	-0.0281043
0.108901	-0.161222	0.0352196
0.182627	-0.118405	0.1252
0.211048	-0.0563922	0.216445
0.200281	-0.0120276	0.27215
0.178116	0.0156519	0.284409
0.12944	0.05384	0.305105
0.10799	0.108268	0.377547
0.168175	0.144049	0.485535
0.23154	0.144231	0.5973
0.227631	0.138464	0.683674
0.183521	0.153161	0.725322
0.144924	0.189662	0.724629
0.0956689	0.23891	0.715088
0.0713937	0.283628	0.713871
0.0962768	0.29665	0.717814
0.109639	0.294304	0.729867
0.085306	0.315486	0.76676
0.079723	0.34307	0.826591
0.0964077	0.331645	0.890897
0.0585052	0.290491	0.949096
-0.00254391	0.263719	0.99672
-0.0131339	0.279601	1.02743
0.0151766	0.345121	1.05312
0.0530038	0.433388	1.08577
0.102655	0.479923	1.10527
0.120241	0.460054	1.09708
0.0608315	0.420803	1.09162
0.0151744	0.411998	1.11458
0.0621605	0.436915	1.14586
0.141002	0.485925	1.16653
0.164261	0.530728	1.17918
0.150082	0.537296	1.19492
0.123466	0.523897	1.22728
0.100191	0.537421	1.29366
0.142122	0.573232	1.37465
0.243503	0.603448	1.4189
0.303179	0.627951	1.40364
0.272817	0.650076	1.36506
0.246777	0.665772	1.35035
0.258769	0.681458	1.39569
0.277267	0.673778	1.49023
0.289497	0.6013	1.56552
0.261172	0.492834	1.56645
0.156665	0.42605	1.53657
0.035405	0.425467	1.54588
0.00544135	0.457532	1.59341
0.0317561	0.488032	1.63203
0.0430299	0.489112	1.62555
0.0509408	0.473864	1.57147
0.0808722	0.503427	1.51324
0.110895	0.59691	1.52137
0.135188	0.686132	1.60568
0.18369	0.727845	1.7014
0.220596	0.763924	1.7602
0.247744	0.842329	1.79445
0.310241	0.9418	1.83063
0.395368	1.00677	1.86775
0.416923	0.997646	1.88971
0.365213	0.92671	1.86983
0.306884	0.853605	1.7934
0.243576	0.83389	1.71173
0.208713	0.860549	1.6856
0.243374	0.884808	1.7155
0.303408	0.891811	1.75283
0.290689	0.903974	1.76897
0.229462	0.932183	1.75497
0.199022	0.941414	1.71902
0.18294	0.898148	1.68962
0.168147	0.817152	1.69728
0.182104	0.739783	1.72218
0.215812	0.714457	1.74035
0.221277	0.773277	1.75832
0.243677	0.871895	1.79451
0.331148	0.909478	1.84477
0.417941	0.842315	1.89478
0.456202	0.729042	1.93527
0.468647	0.64161	1.94696
0.455174	0.61413	1.92333
0.377203	0.635227	1.88869
0.28582	0.658817	1.8537
0.220535	0.65868	1.80271
0.149959	0.675624	1.75039
0.0962	0.743673	1.7352
0.127935	0.813683	1.77315
0.211905	0.819346	1.84531
0.247064	0.760392	1.91664
0.241102	0.690737	1.94176
0.232246	0.672802	1.91233
0.214928	0.726089	1.87972
0.201309	0.795258	1.89374
0.242588	0.814728	1.92829
0.291512	0.807249	1.93025
0.277083	0.835405	1.89362
0.248434	0.903893	1.86133
0.265302	0.972755	1.87871
0.314315	1.00168	1.96647
0.370127	0.976939	2.08614
0.43687	0.940131	2.15239
0.454504	0.960405	2.13381
0.408204	1.02771	2.08429
0.396537	1.0645	2.05512
0.450213	1.04892	2.04649
0.496932	1.03031	2.03959
0.491021	1.0457	2.00593
0.474547	1.09669	1.93916
0.447154	1.13945	1.88889
0.425501	1.11004	1.90213
0.45175	1.00384	1.95387
0.494593	0.914723	1.99052
0.488117	0.923444	2.00197
0.450477	1.00553	2.01195
0.452583	1.08214	2.03477
0.450268	1.11132	2.07982
0.41101	1.11174	2.13238
0.368692	1.12763	2.16359
0.347973	1.17391	2.16611
0.339982	1.20496	2.17929
0.364941	1.15815	2.22477
0.425097	1.03363	2.26917
0.434222	0.91388	2.28148
0.394584	0.877131	2.26948
0.382209	0.913093	2.25538
0.39458	0.965668	2.26442
0.372582	1.01497	2.30746
0.333586	1.07739	2.34925
0.318527	1.16949	2.33985
0.287701	1.28571	2.28924
0.256719	1.37947	2.26462
0.270107	1.37088	2.2991
0.296893	1.26031	2.35951
0.275341	1.1581	2.39149
0.253545	1.1443	2.3645
0.283224	1.1778	2.29611
0.323936	1.18159	2.25055
0.36634	1.13072	2.26105
0.428375	1.05385	2.28524
0.476882	1.01019	2.27145
0.464841	1.02508	2.24398
0.4501	1.04375	2.24641
0.468163	1.02093	2.28775
0.474159	1.00719	2.35066
0.463806	1.06878	2.39838
0.482003	1.18974	2.38291
0.506255	1.29747	2.31625
0.487204	1.32666	2.26628
0.463921	1.26062	2.27052
0.456015	1.15814	2.30372
0.426938	1.09639	2.33541
0.387939	1.07555	2.35673
0.399227	1.03909	2.37019
0.44702	0.982356	2.40347
0.483595	0.958534	2.4616
0.530099	1.00718	2.49175
0.562733	1.12413	2.45809
0.523547	1.24993	2.4137
0.430239	1.29565	2.42743
0.374206	1.25623	2.50127
0.358086	1.21861	2.58765
0.347343	1.23375	2.63046
0.374494	1.25948	2.59713
0.439034	1.24575	2.53334
0.504279	1.17165	2.52193
0.557849	1.06043	2.57434
0.608537	0.995182	2.61866
0.595781	1.03433	2.61221
0.52239	1.12258	2.57886
0.47127	1.15492	2.57088
0.448367	1.105	2.61285
0.402627	1.0351	2.68498
0.343308	1.01765	2.73032
0.318992	1.06836	2.7129
0.287743	1.1329	2.67053
0.244217	1.14268	2.6625
0.24072	1.10276	2.69584
0.265591	1.09909	2.73301
0.283772	1.19273	2.74422
0.315162	1.32836	2.71724
0.379493	1.3964	2.6684
0.396139	1.36669	2.65091
0.35801	1.31779	2.68661
0.328614	1.32063	2.71645
0.313691	1.36857	2.67572
0.308559	1.39252	2.58385
0.393462	1.33295	2.51931
0.59168	1.20769	2.52571
0.756442	1.11677	2.58405
0.791582	1.12972	2.62873
0.729351	1.19313	2.61247
0.633919	1.21069	2.55945
0.549378	1.16714	2.54621
0.534819	1.11846	2.58159
0.563285	1.12248	2.59564
0.53932	1.19183	2.55833
0.480826	1.26582	2.51588
0.452813	1.25799	2.52297
0.433049	1.18355	2.59716
0.386198	1.14399	2.69386
0.38003	1.17722	2.71752
0.438852	1.22755	2.62452
0.480841	1.24029	2.50228
0.473536	1.21146	2.46668
0.432489	1.18816	2.53072
0.346858	1.23935	2.61924
0.241265	1.35754	2.65013
0.226261	1.44923	2.59932
0.303756	1.44725	2.52358
0.369823	1.371	2.51203
0.376238	1.28474	2.58035
0.359321	1.25871	2.65547
0.33945	1.30819	2.68487
0.334344	1.36302	2.68744
0.390941	1.35405	2.6883
0.459116	1.31532	2.69784
0.469584	1.3188	2.71271
0.444958	1.3657	2.70637
0.451854	1.4056	2.66067
0.461651	1.40335	2.62416
0.435292	1.35732	2.64421
0.405218	1.30474	2.69682
0.370676	1.28426	2.72625
0.334872	1.27315	2.71487
0.347154	1.22042	2.68007
0.430064	1.14877	2.65667
0.498352	1.13557	2.6777
0.506878	1.20076	2.7158
0.499611	1.28741	2.70117
0.477534	1.32451	2.61856
0.444508	1.29213	2.53793
0.433268	1.24364	2.52692
0.462983	1.26618	2.57802
0.471056	1.37914	2.63683
0.458478	1.49739	2.65638
0.470776	1.51443	2.63589
0.478127	1.4384	2.6333
0.452224	1.37262	2.68305
0.428508	1.37594	2.73621
0.441619	1.39956	2.71278
0.445946	1.36909	2.61818
0.452861	1.27881	2.53597
0.491427	1.19753	2.53764
0.508812	1.21727	2.6179
0.46277	1.3548	2.71598
0.409106	1.50436	2.75752
0.390418	1.5522	2.71911
0.359355	1.49472	2.66318
0.332414	1.40688	2.66821
0.35886	1.34555	2.72442
0.413233	1.3276	2.75144
0.445661	1.3372	2.71479
0.468599	1.32802	2.65269
0.487154	1.29028	2.62469
0.463196	1.27389	2.67
0.448255	1.30666	2.75541
0.491287	1.34329	2.79564
0.53362	1.34008	2.75873
0.512638	1.30696	2.69527
0.489671	1.28314	2.66163
0.499382	1.30665	2.66582
0.490066	1.37341	2.68571
0.464988	1.41629	2.68283
0.457058	1.39171	2.64292
0.447682	1.3452	2.60816
0.435573	1.33455	2.62382
0.488237	1.35104	2.66001
0.573645	1.36171	2.66978
0.609966	1.34455	2.65574
0.607292	1.30095	2.64814
0.605307	1.27857	2.65889
0.584066	1.32136	2.68475
0.544389	1.39648	2.69352
0.549874	1.44208	2.64162
0.576407	1.44666	2.55029
0.57328	1.43348	2.50379
0.563168	1.42267	2.53968
0.57375	1.43898	2.61067
0.564778	1.47798	2.65367
0.519815	1.48412	2.64023
0.49564	1.42854	2.5933
0.478746	1.35047	2.57623
0.449124	1.28749	2.62947
0.435543	1.22662	2.71159
0.45643	1.15883	2.74995
0.456283	1.10809	2.73876
0.439176	1.10191	2.72584
0.462229	1.15167	2.73231
0.484482	1.24032	2.74326
0.467291	1.30545	2.72759
0.435782	1.30203	2.66959
0.418465	1.26909	2.58702
0.388812	1.28839	2.54162
0.382486	1.37892	2.56228
0.443499	1.46712	2.60437
0.506708	1.47688	2.61917
0.529043	1.41202	2.61002
0.544439	1.32676	2.60281
0.571114	1.26974	2.6164
0.572017	1.24831	2.65816
0.580444	1.22452	2.69722
0.630696	1.15478	2.68538
0.658264	1.06213	2.63138
0.635597	1.01829	2.6029
0.614818	1.04073	2.63485
0.612465	1.09327	2.68923
0.568972	1.14284	2.71569
0.513423	1.17747	2.69295
0.496926	1.20606	2.63933
0.493424	1.26265	2.61445
0.483512	1.34814	2.6554
0.51244	1.38804	2.71625
0.573222	1.32984	2.72708
0.580187	1.23399	2.70086
0.534205	1.19781	2.69093
0.473588	1.25154	2.7096
0.395379	1.35581	2.73236
0.318914	1.43442	2.72401
0.313741	1.43406	2.65883
0.367621	1.39982	2.57956
0.407524	1.41011	2.56796
0.437803	1.46072	2.63953
0.475117	1.48319	2.72311
0.483699	1.44072	2.7605
0.459243	1.34833	2.74636
0.477635	1.25953	2.70515
0.531171	1.2318	2.67726
0.554703	1.24681	2.67896
0.556192	1.2285	2.67115
0.54656	1.16587	2.6217
0.48709	1.12521	2.57749
0.38318	1.14974	2.59911
0.332518	1.22732	2.6771
0.343999	1.31426	2.75168
0.375644	1.35088	2.76878
0.415346	1.32223	2.70812
0.44405	1.2952	2.61398
0.429819	1.31984	2.57393
0.408187	1.34456	2.61699
0.441878	1.30268	2.67337
0.460028	1.21614	2.67532
0.393414	1.15564	2.62145
0.288519	1.16685	2.5716
0.225367	1.23454	2.57998
0.218093	1.29413	2.65518
0.2775	1.29647	2.74215
0.407471	1.27002	2.77653
0.515062	1.27454	2.76231
0.558727	1.31491	2.75326
0.576621	1.34365	2.77001
0.569289	1.34122	2.77335
0.486789	1.34047	2.73292
0.380817	1.37162	2.65734
0.355289	1.40899	2.5726
0.394696	1.41112	2.51445
0.462925	1.37458	2.50737
0.542574	1.31996	2.53631
0.578171	1.28987	2.57702
0.503098	1.32656	2.64369
0.389618	1.40976	2.73555
0.340603	1.45509	2.79513
0.345967	1.41614	2.76942
0.385485	1.32921	2.66688
0.468164	1.2533	2.54176
0.54925	1.23242	2.45344
0.556436	1.27946	2.44561
0.536616	1.3359	2.48732
0.533087	1.33195	2.50003
0.493194	1.2814	2.46272
0.405316	1.25633	2.43037
0.337561	1.28595	2.4447
0.313652	1.35699	2.50083
0.299383	1.44017	2.56216
0.312969	1.49193	2.57337
0.339627	1.49303	2.51025
0.318478	1.47125	2.43418
0.274523	1.44147	2.41445
0.315821	1.3886	2.43784
0.441255	1.33053	2.45588
0.541551	1.30766	2.45493
0.579295	1.32805	2.44835
0.569785	1.37435	2.45803
0.541211	1.41844	2.50472
0.537256	1.41662	2.56217
0.594432	1.36587	2.55769
0.625317	1.33371	2.46808
0.558543	1.36841	2.36042
0.472912	1.43834	2.31233
0.441707	1.48884	2.35167
0.434945	1.48085	2.44191
0.406829	1.40253	2.49738
0.381028	1.30465	2.45916
0.358947	1.26675	2.38023
0.362767	1.29082	2.34898
0.433802	1.31551	2.37591
0.524965	1.31957	2.40073
0.548962	1.32371	2.39739
0.515606	1.32954	2.38517
0.507856	1.33038	2.39189
0.503042	1.32327	2.43836
0.47294	1.30126	2.50404
0.449575	1.27213	2.53928
0.448204	1.26328	2.52987
0.462808	1.27464	2.51514
0.520179	1.28881	2.52697
0.634943	1.31301	2.53454
0.698942	1.37484	2.50281
0.670081	1.46783	2.44261
0.612868	1.53802	2.39915
0.57822	1.55119	2.40909
0.555667	1.53205	2.46724
0.551906	1.52558	2.51067
0.56312	1.54205	2.47113
0.519198	1.56364	2.36861
0.437595	1.55723	2.2908
0.399939	1.4904	2.29463
0.406126	1.37843	2.3611
0.384617	1.28843	2.4385
0.349348	1.25411	2.46832
0.341856	1.24992	2.43609
0.335188	1.25329	2.39341
0.345695	1.27335	2.39722
0.405003	1.30794	2.42997
0.452625	1.35246	2.43459
0.404747	1.41313	2.40107
0.335891	1.46925	2.36203
0.33814	1.48504	2.34519
0.371203	1.4622	2.36641
0.38051	1.42017	2.40794
0.360142	1.35604	2.41837
0.313613	1.28146	2.38286
0.270601	1.22894	2.34348
0.328138	1.21018	2.32457
0.464456	1.22568	2.31042
0.537593	1.27861	2.29738
0.501504	1.33409	2.29101
0.462234	1.34292	2.29096
0.473043	1.31562	2.31786
0.499292	1.29749	2.38938
0.529536	1.30898	2.46157
0.522342	1.35661	2.47617
0.450248	1.43353	2.42795
0.390292	1.50742	2.35711
0.441472	1.56107	2.30299
0.538109	1.60727	2.29592
0.578906	1.63688	2.3227
0.588401	1.62707	2.33381
0.594207	1.59152	2.31916
0.597837	1.55999	2.33189
0.617851	1.53955	2.38864
0.661215	1.54436	2.42728
0.648519	1.57862	2.39463
0.568471	1.59941	2.311
0.52043	1.56014	2.25151
0.533269	1.48021	2.2778
0.558023	1.41148	2.38319
0.561175	1.38231	2.4873
0.556088	1.39815	2.50993
0.523315	1.44042	2.46091
0.508996	1.46415	2.41156
0.569179	1.44292	2.41047
0.640446	1.40099	2.45041
0.629632	1.36303	2.49237
0.550714	1.32446	2.50186
0.483356	1.28246	2.47195
0.43499	1.26492	2.45219
0.431156	1.30018	2.48103
0.486648	1.36971	2.52318
0.534009	1.42411	2.51995
0.525582	1.439	2.47725
0.518872	1.42064	2.44082
0.554779	1.38812	2.44261
0.550438	1.36409	2.48835
0.489943	1.3517	2.53883
0.449888	1.31503	2.52921
0.462943	1.25185	2.45339
0.492769	1.22137	2.38491
0.52838	1.25775	2.381
0.542571	1.33393	2.42532
0.467765	1.40984	2.47878
0.358622	1.45341	2.51641
0.32441	1.44647	2.5359
0.376271	1.42313	2.55809
0.445503	1.43327	2.5996
0.51998	1.45968	2.62929
0.574772	1.4533	2.61033
0.56484	1.41842	2.57731
0.544837	1.39731	2.58269
0.579215	1.40721	2.62042
0.607733	1.43993	2.64854
0.547158	1.46478	2.63967
0.446611	1.44318	2.58701
0.369974	1.38359	2.52604
0.322819	1.33832	2.50882
0.314705	1.33049	2.53112
0.352442	1.34205	2.54007
0.384904	1.36091	2.52763
0.390302	1.37162	2.518
0.445963	1.35806	2.51318
0.541384	1.34368	2.50538
0.57995	1.34524	2.4994
0.541192	1.32058	2.49319
0.504496	1.24653	2.47608
0.497671	1.16654	2.45998
0.507522	1.13073	2.46779
0.545847	1.15858	2.50318
0.553631	1.24088	2.55472
0.491481	1.31804	2.60981
0.421964	1.3251	2.6473
0.41993	1.27946	2.64545
0.423773	1.24334	2.61046
0.377713	1.24446	2.55696
0.323774	1.28055	2.48984
0.286516	1.35398	2.43043
0.278419	1.45004	2.41204
0.323333	1.52197	2.43478
0.406879	1.53293	2.45226
0.426958	1.48709	2.43934
0.381501	1.41661	2.40756
0.367304	1.3679	2.37726
0.390587	1.38572	2.3637
0.406267	1.46979	2.3845
0.408838	1.55921	2.42734
0.414679	1.58883	2.44825
0.402822	1.55004	2.43677
0.433285	1.48929	2.42206
0.549061	1.45424	2.42596
0.646015	1.46996	2.45367
0.635698	1.51999	2.5028
0.57631	1.54485	2.54109
0.559618	1.5009	2.52766
0.579232	1.42629	2.47983
0.632282	1.38379	2.44185
0.690797	1.36985	2.4228
0.678248	1.35871	2.41577
0.584983	1.36263	2.42875
0.517144	1.39286	2.4558
0.514496	1.44189	2.47391
0.482182	1.48721	2.48675
0.395303	1.47888	2.49133
0.316085	1.38226	2.46122
0.291316	1.2596	2.40263
0.34126	1.21461	2.36322
0.476789	1.26032	2.36684
0.602413	1.32851	2.40577
0.59049	1.3499	2.46153
0.489441	1.29638	2.49332
0.430595	1.19952	2.45882
0.442789	1.14142	2.38897
0.46777	1.15568	2.3557
0.486702	1.19059	2.37681
0.475978	1.20268	2.4237
0.438981	1.20503	2.47832
0.451604	1.22538	2.53248
0.536496	1.28191	2.57819
0.588145	1.36347	2.62044
0.523426	1.42045	2.64636
0.426714	1.42875	2.62063
0.368996	1.44048	2.5485
0.35273	1.49401	2.48452
0.374576	1.54463	2.45727
0.417937	1.53287	2.44702
0.42221	1.44507	2.43632
0.387875	1.31218	2.42563
0.398072	1.2094	2.42065
0.438805	1.20772	2.43868
0.454753	1.28628	2.48221
0.456573	1.34951	2.51505
0.475694	1.34881	2.50054
0.481224	1.31762	2.46837
0.465642	1.30487	2.46568
0.462551	1.32193	2.49212
0.43972	1.33823	2.51655
0.407104	1.3126	2.51753
0.437278	1.25067	2.49578
0.551613	1.22134	2.47264
0.645046	1.27102	2.48524
0.660929	1.35028	2.53304
0.63995	1.36481	2.56583
0.590019	1.2977	2.5538
0.540678	1.21682	2.52238
0.544593	1.17884	2.50498
0.586965	1.17189	2.50732
0.562976	1.15659	2.52325
0.473466	1.11993	2.52804
0.399049	1.08635	2.48823
0.350361	1.10065	2.41687
0.324468	1.17311	2.3675
0.340405	1.23628	2.35945
0.369225	1.22588	2.35991
0.351506	1.17761	2.3525
0.351483	1.17824	2.34327
0.438365	1.24803	2.34627
0.538008	1.33472	2.38348
0.558461	1.37128	2.46426
0.517054	1.31485	2.54489
0.461177	1.2136	2.57261
0.395271	1.18479	2.54861
0.373743	1.27199	2.49546
0.39806	1.38397	2.42044
0.38253	1.41292	2.34397
0.316742	1.33097	2.29028
0.310085	1.1986	2.26259
0.379875	1.11944	2.26933
0.421346	1.14105	2.32754
0.409049	1.19921	2.40648
0.385072	1.21623	2.44353
0.386548	1.20902	2.43066
0.450993	1.24307	2.40888
0.597514	1.32509	2.40165
0.707855	1.39754	2.4107
0.665776	1.39185	2.43139
0.533935	1.29827	2.4386
0.436179	1.20232	2.41593
0.40289	1.19786	2.38642
0.397754	1.2624	2.37301
0.406017	1.29703	2.3605
0.372234	1.26821	2.3386
0.297104	1.21923	2.3164
0.270482	1.20138	2.29674
0.308272	1.24107	2.27771
0.317152	1.29588	2.27443
0.2603	1.28655	2.28418
0.228284	1.21608	2.27386
0.253091	1.17738	2.23578
0.320816	1.22148	2.2057
0.40884	1.29627	2.21257
0.471321	1.32457	2.24716
0.462617	1.27903	2.29035
0.427369	1.20765	2.32027
0.440566	1.19898	2.31666
0.440178	1.28902	2.29996
0.371944	1.40053	2.30592
0.273703	1.41804	2.33453
0.201976	1.32223	2.35341
0.15881	1.21421	2.34736
0.172885	1.19279	2.31376
0.253508	1.2472	2.24734
0.298744	1.29376	2.16888
0.277674	1.28327	2.11318
0.268736	1.25339	2.08459
0.315107	1.28854	2.0636
0.361352	1.405	2.06146
0.385389	1.50138	2.08845
0.392698	1.46737	2.12158
0.360981	1.33386	2.13834
0.33962	1.23977	2.14155
0.389211	1.25041	2.13401
0.452759	1.31164	2.11843
0.408753	1.34522	2.12122
0.305049	1.31473	2.13788
0.271874	1.24718	2.12253
0.330332	1.22637	2.06494
0.431117	1.29762	2.00086
0.532569	1.3874	1.95622
0.580417	1.39367	1.93948
0.532852	1.30622	1.95616
0.469307	1.19472	1.97666
0.439618	1.14105	1.96209
0.381089	1.16372	1.92494
0.269026	1.17696	1.89099
0.185453	1.09102	1.85264
0.16259	0.948211	1.80788
0.162492	0.870716	1.78185
0.190227	0.906489	1.78619
0.216331	0.995768	1.80874
0.178959	1.06311	1.82992
0.117513	1.08695	1.81969
0.162694	1.10778	1.75387
0.303642	1.17047	1.67031
0.410162	1.23606	1.6391
0.43271	1.22013	1.67774
0.380731	1.12061	1.7431
0.284192	1.03075	1.79087
0.208096	1.03061	1.80175
0.222595	1.1205	1.78064
0.264167	1.22652	1.75768
0.26441	1.24399	1.75005
0.264555	1.13969	1.7266
0.282474	1.01388	1.65748
0.272354	0.97367	1.57517
0.22987	0.999487	1.53221
0.211862	1.00088	1.52753
0.207687	0.936295	1.51809
0.236399	0.848385	1.46644
0.348702	0.824092	1.37338
0.49625	0.90786	1.28665
0.564943	1.03439	1.27487
0.532846	1.09359	1.34899
0.473458	1.06623	1.43914
0.395773	1.02866	1.48806
0.313533	1.03491	1.49735
0.250987	1.04767	1.49177
0.1884	1.01116	1.48299
0.113758	0.941421	1.4803
0.0988381	0.914015	1.47277
0.193381	0.971696	1.43743
0.290575	1.07418	1.39361
0.323932	1.12824	1.38816
0.331303	1.06092	1.42207
0.341941	0.90721	1.44982
0.340666	0.794896	1.44482
0.354989	0.805643	1.40597
0.38134	0.890044	1.34695
0.33998	0.940211	1.30913
0.253881	0.896847	1.31804
0.226247	0.791158	1.34374
0.270882	0.728166	1.35505
0.291904	0.782193	1.37272
0.263279	0.876719	1.40439
0.210229	0.881703	1.41536
0.153377	0.7899	1.3911
0.169643	0.709312	1.34562
0.298844	0.712274	1.29402
0.432499	0.781462	1.26589
0.438899	0.84927	1.29253
0.373838	0.86292	1.34691
0.337928	0.841802	1.36777
0.3272	0.848964	1.34167
0.313931	0.888897	1.30119
0.297698	0.896634	1.27166
0.253552	0.839588	1.26624
0.17844	0.747625	1.27538
0.156251	0.678668	1.26217
0.195519	0.683952	1.21614
0.216017	0.760364	1.18227
0.186104	0.836588	1.1931
0.165923	0.85816	1.21738
0.168936	0.850803	1.21518
0.173767	0.858623	1.17567
0.201836	0.883567	1.11142
0.227526	0.905456	1.06195
0.212365	0.894978	1.07084
0.199023	0.843385	1.1262
0.266412	0.814072	1.16449
0.348878	0.881938	1.1543
0.337786	1.00984	1.11247
0.233576	1.08071	1.06066
0.0852077	1.04275	1.00999
-0.0399655	0.949444	0.974879
-0.0644845	0.884532	0.968725
0.0276109	0.88674	0.996567
0.112598	0.903906	1.06592
0.127123	0.85261	1.15491
0.137944	0.741858	1.20453
0.179612	0.684697	1.17178
0.222944	0.755957	1.08393
0.24843	0.884953	0.995792
0.268977	0.930181	0.936811
0.248321	0.841039	0.922738
0.221872	0.708222	0.947476
0.249186	0.654482	0.974721
0.285059	0.713595	0.982947
0.261373	0.805033	0.99637
0.226222	0.817731	1.03176
0.262773	0.740765	1.06595
0.320463	0.689389	1.0826
0.344862	0.750357	1.08411
0.32164	0.858574	1.07318
0.236867	0.897694	1.0569
0.121478	0.850926	1.05026
0.0808601	0.792697	1.04029
0.137881	0.795507	1.0064
0.172162	0.856882	0.97737
0.142707	0.889028	0.993077
0.103609	0.802765	1.04249
0.0734979	0.646672	1.08116
0.0309471	0.565651	1.07806
0.00841085	0.609233	1.01401
0.00636756	0.678356	0.911539
-0.0323888	0.665088	0.847052
-0.0643318	0.569963	0.862063
-0.00402149	0.492805	0.912864
0.122501	0.535905	0.941516
0.219627	0.676003	0.935545
0.277461	0.775014	0.908737
0.285978	0.752302	0.885945
0.223892	0.673987	0.890783
0.15879	0.633885	0.912059
0.163881	0.640839	0.919615
0.181013	0.648802	0.921668
0.134764	0.616756	0.941833
0.0811941	0.552513	0.965477
0.0682193	0.525954	0.968442
0.0880803	0.58343	0.960772
0.134403	0.671262	0.962497
0.194144	0.694276	0.968388
0.199345	0.626917	0.969169
0.135705	0.528659	0.956002
0.0987127	0.496229	0.913949
0.105032	0.583783	0.852828
0.0970926	0.718853	0.810123
0.0704561	0.756291	0.804237
0.0858097	0.6588	0.812419
0.147312	0.538816	0.811324
0.236155	0.510776	0.790538
0.339691	0.568705	0.75504
0.361544	0.623751	0.735215
0.255908	0.596443	0.76815
0.12351	0.498934	0.835141
0.0912831	0.441565	0.863521
0.12946	0.496786	0.819446
0.16893	0.596006	0.736219
0.184082	0.622363	0.666267
0.142543	0.556751	0.643373
0.0674204	0.467349	0.670471
0.0373075	0.409907	0.706341
0.0761964	0.38755	0.701073
0.0876607	0.362923	0.674509
0.0524247	0.306105	0.680176
0.0470775	0.247718	0.724399
0.0846895	0.274344	0.774607
0.135163	0.42429	0.805395
0.192057	0.606764	0.803662
0.237822	0.687272	0.774532
0.213522	0.632346	0.761028
0.170989	0.538622	0.781107
0.188609	0.504367	0.795723
0.222211	0.54042	0.776617
0.199156	0.56852	0.744614
0.154403	0.496008	0.715719
0.15696	0.336837	0.685488
0.200658	0.22205	0.668807
0.286547	0.238689	0.680256
0.368115	0.314816	0.706852
0.338487	0.336063	0.731803
0.180823	0.291239	0.740656
0.0447229	0.255276	0.709881
0.0259817	0.29768	0.64459
0.0484865	0.41478	0.596505
0.0543441	0.511992	0.594134
0.0519887	0.509773	0.616791
0.0386616	0.45095	0.64648
0.0311521	0.429886	0.676302
0.0983331	0.463262	0.682948
0.202861	0.497258	0.657016
0.230813	0.471009	0.632283
0.191951	0.367376	0.640489
0.174504	0.258117	0.670559
0.191339	0.246581	0.692401
0.207511	0.331019	0.682413
0.221733	0.418271	0.631598
0.185685	0.461719	0.571201
0.0834235	0.496914	0.545112
0.00965702	0.571406	0.550934
0.0341416	0.682407	0.545608
0.0942766	0.75879	0.525422
0.117173	0.726181	0.525284
0.138902	0.61037	0.554046
0.163329	0.528986	0.583308
0.178641	0.536475	0.580656
0.207761	0.561761	0.530245
0.247714	0.531595	0.448955
0.219168	0.466804	0.396864
0.127836	0.447074	0.416262
0.0896438	0.528574	0.477349
0.113413	0.676601	0.525167
0.137526	0.76568	0.543265
0.13582	0.705821	0.545086
0.114295	0.55737	0.541125
0.06103	0.462477	0.550601
0.0234918	0.483925	0.57066
0.0506032	0.552707	0.561233
0.0722117	0.559724	0.512537
0.0459065	0.472276	0.468972
0.024346	0.358961	0.463829
0.0574876	0.315251	0.478926
0.0976192	0.355517	0.499625
0.121617	0.397054	0.517541
0.139183	0.363571	0.517609
0.120146	0.305016	0.506638
0.0880711	0.333086	0.499555
0.108256	0.448292	0.481035
0.160796	0.528923	0.431342
0.139455	0.495268	0.383383
0.0709499	0.40194	0.37535
0.0541716	0.370395	0.398507
0.0923064	0.476215	0.419766
0.139045	0.66829	0.416163
0.178171	0.792054	0.379066
0.182755	0.758214	0.334004
0.124079	0.64176	0.337285
0.0825621	0.55882	0.392793
0.113151	0.530763	0.443208
0.14426	0.506552	0.458125
0.113637	0.44268	0.460412
0.0766972	0.346276	0.471395
0.0872419	0.290636	0.48389
0.125961	0.33261	0.476363
0.197137	0.414365	0.418533
0.268844	0.417747	0.31608
0.251664	0.321769	0.23337
0.134461	0.223123	0.226488
0.0425232	0.228887	0.276764
0.033515	0.353399	0.326864
0.0521554	0.490239	0.348047
0.0736778	0.515442	0.34738
0.0889904	0.441996	0.348521
0.0763526	0.401245	0.379364
0.0510931	0.456262	0.436687
0.078565	0.532944	0.473682
0.111007	0.53647	0.464739
0.0676878	0.449134	0.440214
-0.0181468	0.34767	0.437192
-0.0740387	0.344316	0.460106
-0.0887974	0.45633	0.49283
-0.0717121	0.570505	0.50375
-0.00590793	0.576466	0.466135
0.0506622	0.487841	0.399156
0.0603782	0.398158	0.347385
0.0732779	0.38198	0.321474
0.110956	0.436152	0.290306
0.106709	0.477044	0.246056
0.0469359	0.424865	0.215204
0.0159898	0.316995	0.218501
0.022301	0.278787	0.257111
0.0471881	0.362788	0.312989
0.0819188	0.475965	0.348667
0.0875507	0.497127	0.337195
0.0189313	0.407998	0.312432
-0.0423099	0.3002	0.315032
0.0169724	0.260528	0.326273
0.125555	0.280572	0.310395
0.176124	0.272853	0.262427
0.150081	0.183846	0.205136
0.0927139	0.080524	0.176384
0.0476441	0.0888598	0.212163
0.0853104	0.231843	0.282249
0.199054	0.377205	0.30301
0.25416	0.394741	0.249142
0.209659	0.30139	0.183437
0.154921	0.205135	0.166341
0.14218	0.188625	0.196591
0.128956	0.247358	0.247894
0.125713	0.290242	0.289154
0.150427	0.243676	0.297953
0.153954	0.168073	0.288025
0.137689	0.176526	0.28613
0.156163	0.26064	0.285065
0.19252	0.319088	0.273427
0.165101	0.294443	0.273005
0.105708	0.212134	0.292176
0.0755935	0.155407	0.315653
0.0638512	0.201187	0.343582
0.0546215	0.307966	0.366005
0.0550159	0.347711	0.339859
0.0294895	0.282382	0.260532
-0.0450011	0.212068	0.193807
-0.0667949	0.235433	0.194583
0.0230831	0.341492	0.247745
0.148875	0.430021	0.299558
0.229481	0.403907	0.302109
0.273264	0.287599	0.254913
0.267907	0.228999	0.225292
0.203805	0.314732	0.271872
0.152875	0.456824	0.356952
0.145449	0.516156	0.395876
0.1393	0.455796	0.365333
0.127966	0.351605	0.307566
0.167304	0.307241	0.262305
0.217484	0.352314	0.24001
0.20796	0.399275	0.225597
0.16287	0.355723	0.206629
0.116049	0.259746	0.201612
0.0757546	0.22407	0.244956
0.0682278	0.281178	0.321156
0.129328	0.363566	0.356488
0.188673	0.393307	0.3067
0.195	0.347404	0.206133
0.185645	0.272223	0.127459
0.180839	0.245315	0.111188
0.155208	0.273554	0.147099
0.112251	0.272219	0.179635
0.0812903	0.186675	0.149489
0.0167511	0.0812749	0.0767227
-0.0632076	0.0589311	0.0371943
-0.0787694	0.146529	0.0649016
-0.0229066	0.270537	0.12493
0.0216976	0.321645	0.181232
0.0206439	0.256108	0.216144
0.00843452	0.154217	0.219971
-0.0218263	0.141695	0.213569
-0.0337248	0.233147	0.212975
0.013768	0.299409	0.19473
0.0773088	0.242576	0.136182
0.0880824	0.136888	0.0567463
0.0829419	0.135404	-0.0172734
0.121165	0.274687	-0.0664699
0.147035	0.428821	-0.0580895
0.135941	0.446507	0.010039
0.127729	0.301765	0.0788533
0.129853	0.141993	0.112029
0.11087	0.133202	0.148541
0.116726	0.260033	0.212961
0.170643	0.3561	0.266083
0.19663	0.325746	0.279218
0.172304	0.232426	0.267707
0.144217	0.189019	0.26713
0.118368	0.24638	0.311113
0.06781	0.350167	0.396807
0.0452579	0.381434	0.459388
0.0595446	0.306998	0.444872
0.0374327	0.239865	0.386383
-0.0172546	0.290474	0.355353
-0.0174354	0.421292	0.377027
0.043411	0.507714	0.42661
0.0908144	0.473947	0.4664
0.115575	0.359672	0.468584
0.118344	0.276313	0.439445
0.088551	0.28494	0.416406
0.0752968	0.318568	0.411314
0.14093	0.281349	0.388192
0.223316	0.19536	0.332341
0.24167	0.17183	0.275529
0.244723	0.273155	0.249034
0.258768	0.43633	0.262582
0.237742	0.520102	0.307212
0.162811	0.442405	0.347855
0.0792275	0.295955	0.351163
-0.00896049	0.254052	0.344689
-0.0731943	0.3476	0.38586
-0.0456518	0.433885	0.480281
0.0303994	0.387478	0.575724
0.0573498	0.234825	0.618942
0.0239306	0.112042	0.586754
0.00428385	0.130274	0.489524
0.0100338	0.261869	0.371202
0.0480045	0.36141	0.272304
0.132898	0.334359	0.203407
0.205992	0.259462	0.160014
0.204507	0.283012	0.15848
0.15644	0.422381	0.210605
0.132421	0.538162	0.286143
0.107741	0.498261	0.348911
0.0758647	0.314864	0.370973
0.0700605	0.129158	0.33739
0.0706812	0.0817836	0.279737
0.0502263	0.168141	0.272425
0.0389911	0.246268	0.334941
0.0668636	0.218359	0.392581
0.0716064	0.140292	0.3803
0.056958	0.126415	0.309221
0.0795569	0.193605	0.23682
0.12654	0.257407	0.217739
0.150817	0.230485	0.263939
0.177669	0.116398	0.319614
0.235286	0.0211004	0.317913
0.261202	0.0550557	0.269861
0.23761	0.198003	0.235567
0.199505	0.295689	0.238423
0.15028	0.245721	0.260918
0.0715246	0.124965	0.292224
0.0172471	0.070384	0.314059
0.0128104	0.117421	0.310811
0.00286505	0.181886	0.305858
0.00664445	0.154849	0.318129
0.0720831	0.0191306	0.327388
0.147827	-0.100145	0.314573
0.154718	-0.0777708	0.292208
0.140664	0.0487522	0.275762
0.142874	0.1333	0.277178
0.108317	0.0976395	0.30922
0.0384439	-0.00232658	0.354886
-0.00763102	-0.0551857	0.382591
-0.0191502	-0.00695233	0.398035
-0.0124135	0.0682691	0.424618
0.0483412	0.0521944	0.447995
0.125721	-0.0526701	0.434527
0.137394	-0.113824	0.391682
0.0933263	-0.0391849	0.363516
0.0741244	0.126401	0.377077
0.0884366	0.263351	0.427091
0.109622	0.289953	0.476837
0.157526	0.239588	0.4734
0.182374	0.239059	0.41131
0.129355	0.342337	0.349546
0.0492561	0.443823	0.334213
0.0285102	0.420805	0.347848
0.0391271	0.283177	0.360147
0.0253948	0.142628	0.363291
0.00515723	0.103145	0.364851
-0.0222955	0.172738	0.385106
-0.0489945	0.237625	0.439607
-0.0240927	0.179925	0.500745
0.0811129	0.0310413	0.513251
0.189088	-0.0756775	0.469138
0.259269	-0.0741872	0.411404
0.325623	-0.0182391	0.382351
0.35371	0.00473448	0.389189
0.30039	-0.0399867	0.41218
0.19833	-0.101163	0.417565
0.115422	-0.07967	0.388597
0.0416973	0.0576194	0.364926
0.000695667	0.215668	0.390057
0.0298201	0.269391	0.442014
0.0747907	0.213486	0.465895
0.0911604	0.153246	0.449037
0.117299	0.163404	0.415788
0.182991	0.211416	0.389511
0.210696	0.218537	0.391856
0.171225	0.162723	0.410538
0.0922218	0.110774	0.403022
-0.0271993	0.158021	0.365123
-0.153623	0.307698	0.345299
-0.186116	0.425328	0.360017
-0.100572	0.388926	0.375764
-0.00725365	0.242225	0.368843
0.0476394	0.131558	0.328024
0.0774515	0.117702	0.253692
0.0687047	0.143781	0.178951
0.0363142	0.124493	0.145835
0.0658739	0.0330264	0.140348
0.165424	-0.0445054	0.123265
0.218708	0.0103087	0.0979904
0.193725	0.181902	0.0883717
0.1423	0.320218	0.101227
0.0886748	0.334631	0.131326
0.0296067	0.273834	0.161447
0.0085182	0.242605	0.167232
0.0251048	0.294082	0.156972
0.0342287	0.381835	0.172878
0.0576378	0.403665	0.224777
0.119051	0.336131	0.276221
0.158679	0.265915	0.301688
0.12509	0.254983	0.302442
0.0826024	0.259729	0.282566
0.0699767	0.21775	0.258956
0.0751763	0.130167	0.259051
0.108868	0.0695836	0.272766
0.167016	0.123687	0.25403
0.180473	0.287124	0.194415
0.120942	0.421073	0.135744
0.0751072	0.403833	0.107877
0.0673159	0.278006	0.107118
0.0614277	0.172616	0.114561
0.0521412	0.1494	0.10846
0.0433596	0.178235	0.0904478
0.00840251	0.189906	0.0989078
-0.0270677	0.147527	0.148798
0.0159467	0.10942	0.203051
0.0935676	0.173536	0.228553
0.122134	0.332819	0.23403
0.099639	0.460681	0.241145
0.0772068	0.463321	0.258633
0.0505046	0.36489	0.296477
0.0282555	0.258809	0.340238
0.0421118	0.214804	0.348592
0.0449879	0.226272	0.313213
0.0217093	0.226864	0.273331
0.0259903	0.179162	0.253221
0.0744416	0.135614	0.225969
0.0780226	0.181453	0.174746
0.0390155	0.316141	0.113059
0.0573429	0.429431	0.067028
0.142746	0.41877	0.0697092
0.256973	0.291581	0.13158
0.366843	0.143144	0.20691
0.419676	0.0699179	0.242947
0.351323	0.0793101	0.255695
0.237166	0.0890314	0.280165
0.178124	0.0315511	0.310104
0.135735	-0.039196	0.320924
0.063881	-0.0133892	0.298572
0.00697517	0.108898	0.236139
0.00390196	0.216835	0.159104
0.0174321	0.23245	0.129447
0.0614201	0.182939	0.16441
0.128283	0.146468	0.213727
0.137371	0.182141	0.233704
0.0709989	0.266936	0.226713
0.0237014	0.29743	0.215944
0.0362529	0.217525	0.22256
0.0484429	0.0976617	0.251991
0.0602639	0.0309776	0.264907
0.0837826	0.0235129	0.22124
0.0890318	0.0128329	0.151678
0.0872747	-0.0655444	0.123182
0.145703	-0.210466	0.153915
0.233829	-0.318612	0.213468
0.258293	-0.284533	0.260773
0.232756	-0.132648	0.2622
0.208932	0.00892705	0.216652
0.174636	0.0490566	0.168842
0.111918	-0.00948674	0.160248
0.0640903	-0.0906919	0.174692
0.0233264	-0.113258	0.173593
-0.0249286	-0.0785837	0.144858
-0.0182032	-0.0467922	0.103082
0.0661034	-0.0229649	0.0713802
0.144075	0.0544101	0.0723551
0.142506	0.190814	0.100294
0.100049	0.300362	0.121637
0.033569	0.297937	0.129346
-0.0308535	0.172596	0.152637
-0.0308967	0.0038792	0.196038
0.0321943	-0.0784142	0.220534
0.0847693	-0.0315281	0.206355
0.115618	0.0402296	0.172321
0.183972	0.0200561	0.140402
0.247483	-0.0762062	0.123062
0.247681	-0.143256	0.117744
0.189116	-0.112363	0.106926
0.105036	-0.0165859	0.0784846
0.0232086	0.0400185	0.070464
0.00864683	-0.00929036	0.116464
0.0954954	-0.107767	0.18376
0.177487	-0.136083	0.232754
0.186074	-0.057386	0.262848
0.165355	0.0441656	0.274545
0.167341	0.0808837	0.253746
0.160233	0.0620065	0.212607
0.132994	0.0548511	0.165502
0.109057	0.0981902	0.11243
0.0553948	0.168538	0.07482
-0.00198938	0.195043	0.0772849
0.00593444	0.119551	0.101912
0.0665559	-0.0145915	0.118279
0.0728747	-0.0842651	0.127139
0.0179788	-0.025919	0.121598
-0.0283676	0.0883797	0.0861444
-0.0362583	0.149148	0.048476
0.0269688	0.128789	0.0593564
0.160532	0.0792606	0.128811
0.258997	0.0684681	0.226036
0.20952	0.11394	0.322682
0.105766	0.146149	0.379669
0.0923226	0.0924295	0.366696
0.14926	-0.00552521	0.306924
0.186498	-0.0390584	0.24292
0.185914	0.0101117	0.189153
0.166762	0.0675229	0.152269
0.138268	0.0667351	0.150563
0.152859	0.00425798	0.174339
0.188259	-0.0598664	0.189489
0.14637	-0.0497457	0.183306
0.0435526	0.0256859	0.158196
0.0182798	0.0834235	0.110883
0.0995327	0.0830553	0.0597488
0.194979	0.0597833	0.0368353
0.262238	0.0599163	0.0465174
0.266796	0.096182	0.0688168
0.176455	0.134112	0.0972082
0.04688	0.109868	0.135337
-0.00281714	0.0201371	0.172446
0.0153364	-0.0498919	0.196296
0.0202817	-0.042796	0.196692
0.00964834	-0.00646744	0.154682
-8.64399e-05	-0.00366135	0.0698625
-0.00998099	-0.0294093	-0.0146109
0.00164641	-0.0271318	-0.0514539
0.0687606	0.0590458	-0.0408638
0.119577	0.214476	-0.00434934
0.108294	0.325655	0.040682
0.102504	0.288826	0.0772656
0.143803	0.140567	0.0962918
0.192304	0.012546	0.114145
0.219087	-0.00447742	0.129974
0.240512	0.0846732	0.108964
0.226869	0.198143	0.0494819
0.196292	0.238685	-0.00285875
0.191431	0.186926	-0.0121654
0.171538	0.126077	0.0141363
0.0746721	0.137146	0.0607589
-0.0414404	0.203633	0.102398
-0.0579971	0.243285	0.106416
-0.00442666	0.214954	0.07883
0.0488032	0.155752	0.0494501
0.072032	0.118615	0.02268
0.0566688	0.116973	-0.0036301
0.0102466	0.117491	-0.00827883
0.00126085	0.0742016	0.0162107
0.055791	-0.0103466	0.0477658
0.0621586	-0.0698781	0.0797866
-0.0125566	-0.0582881	0.115949
-0.0807156	-0.0172622	0.137846
-0.0917796	-0.00456165	0.130762
-0.0870935	-0.00909433	0.117206
-0.0730575	0.00985508	0.11395
-0.0560748	0.0591948	0.116519
-0.0826146	0.102282	0.126645
-0.102749	0.0928941	0.142874
-0.0289967	0.0019404	0.145466
0.10904	-0.116516	0.136153
0.191908	-0.159076	0.152504
0.205538	-0.107685	0.1979
0.190303	-0.0519875	0.23261
0.148892	-0.0574215	0.236401
0.109635	-0.108294	0.213092
0.0961544	-0.148105	0.167738
0.049371	-0.128791	0.122467
-0.0793993	-0.0696881	0.102139
-0.168744	-0.0524002	0.0961756
-0.121396	-0.103262	0.0851322
-0.00274121	-0.144474	0.0838441
0.0956341	-0.110246	0.108925
0.162874	-0.0218735	0.147227
0.191693	0.053715	0.182788
0.196545	0.0639796	0.211706
0.249286	0.0283317	0.227778
0.319174	0.0304656	0.234636
0.306333	0.103781	0.246651
0.208472	0.177905	0.255955
0.13751	0.176098	0.22213
0.132019	0.115985	0.137396
0.15477	0.0642478	0.04663
0.184215	0.0608885	-0.00626656
0.165949	0.100413	-0.0130712
0.0764636	0.136567	0.0187496
-0.00495582	0.121768	0.0686241
0.0177149	0.0842957	0.104173
0.0779427	0.0935151	0.122839
0.0772878	0.147462	0.137489
[truncated: 1,501 more rows]

## Sheet: panel_D
	-0.0225758	-0.0811688	-0.0152729	0.0557898			-0.0811422	-0.0284149	0.107199	-0.00931754
	-0.00266788	-0.0662265	-0.0246043	0.0709971			-0.0417234	-0.0633718	0.106787	-0.00199618
	-0.000272171	-0.0600619	-0.0100151	0.0910085			0.00826666	-0.0642844	0.0802836	-0.0149466
	-0.00429682	-0.0488621	0.00700245	0.0788816			0.0393878	-0.0377626	0.0492128	-0.0283026
	0.000342771	-0.0273034	0.00300004	0.0369928			0.0354201	-0.0105851	0.021049	-0.0237344
	0.0165797	-0.00742024	-0.0203373	-0.0119818			0.0160859	-0.00441274	0.00321448	-0.0126749
	0.0206603	-0.00106241	-0.0390641	-0.04424			-0.00213346	-0.0196067	0.0172849	-0.0105316
	-0.00227221	-0.00920535	-0.0309095	-0.0460444			-0.0212348	-0.036383	0.0690423	-0.0191326
	-0.0288185	-0.025161	-0.00428292	-0.0271313			-0.0264914	-0.0359287	0.130103	-0.0353455
	-0.0355065	-0.0373365	0.00457149	-0.0136433			-0.00571676	-0.0249254	0.176852	-0.0503733
	-0.0313984	-0.037468	-0.024285	-0.0131012			0.01428	-0.0240756	0.190328	-0.0475236
	-0.0300892	-0.0341169	-0.0734816	-0.0150338			0.0107204	-0.0304253	0.153116	-0.0267054
	-0.0326428	-0.0452032	-0.110245	-0.0165008			0.000427558	-0.0276912	0.0888529	-0.00978612
	-0.0399971	-0.0704185	-0.115355	-0.0194852			-0.0116126	-0.022	0.0439681	-0.00685413
	-0.0462751	-0.090005	-0.10197	-0.0194608			-0.042517	-0.031444	0.0266042	-0.00462954
	-0.0390054	-0.0841108	-0.0986885	-0.0138752			-0.0805484	-0.0591611	0.0152033	0.00395098
	-0.0270765	-0.0489576	-0.108059	0.00216806			-0.100202	-0.0901426	0.0074988	0.0171782
	-0.0324935	-0.00559877	-0.0940025	0.0326673			-0.113561	-0.106899	0.0097881	0.0389238
	-0.0516098	0.0194784	-0.0368628	0.0696922			-0.120528	-0.0981079	0.0275049	0.0645008
	-0.0555476	0.0207326	0.0396005	0.0873791			-0.0890524	-0.073857	0.0689003	0.0786063
	-0.0306903	0.015148	0.0919845	0.0711024			-0.0276644	-0.0625535	0.119846	0.0798299
	0.00420082	0.017883	0.0958297	0.0334176			0.0252704	-0.0763626	0.144882	0.0797352
	0.0264868	0.0222493	0.0636327	-0.00738721			0.0623881	-0.092507	0.132805	0.0764404
	0.0251362	0.0105278	0.0298135	-0.029245			0.0856047	-0.0877158	0.107799	0.0621875
	0.001806	-0.0136133	0.0148126	-0.0234015			0.0717775	-0.0696896	0.0873133	0.0466103
	-0.0222089	-0.0283282	0.0150947	-0.00053829			0.0308871	-0.0549718	0.0684455	0.0374196
	-0.0267585	-0.0269658	0.0236469	0.0262945			0.00634666	-0.053514	0.0520692	0.0302457
	-0.0202096	-0.0191947	0.0319587	0.0661859			0.00430885	-0.0759374	0.0392401	0.0255644
	-0.02971	-0.00968233	0.0289767	0.118018			0.00499814	-0.103014	0.027854	0.0273024
	-0.0576093	-0.00924874	0.0131187	0.156812			0.00811926	-0.0902228	0.0284467	0.0247098
	-0.0757584	-0.0212235	-0.00655264	0.154552			0.0167543	-0.0399831	0.0541907	0.0108523
	-0.0647304	-0.0167154	-0.0247359	0.100095			0.0205856	-0.00708092	0.0883376	0.000862684
	-0.0320387	0.0202996	-0.0393344	0.0120168			0.0230616	-0.0102837	0.104241	0.00330657
	-0.00060084	0.0562976	-0.0402972	-0.0654965			0.0304993	-0.0230774	0.103539	0.00726931
	0.0082286	0.0608892	-0.0280074	-0.103685			0.0266806	-0.027296	0.09721	0.0135531
	-0.00952975	0.0435113	-0.0204704	-0.106476			0.000707846	-0.0137407	0.0930096	0.0313616
	-0.0270179	0.0216976	-0.0251463	-0.0915138			-0.0264217	0.0149548	0.0959511	0.0481858
	-0.0165503	0.00759874	-0.0302587	-0.0689882			-0.0287587	0.0272396	0.0996524	0.0562574
	0.0086804	0.0124084	-0.0227843	-0.0469855			-0.0089151	0.00179457	0.086318	0.0689499
	0.0145813	0.0227855	0.00576495	-0.0241794			0.0216253	-0.0266727	0.053601	0.0834444
	-0.0017541	0.0107329	0.0500218	-0.00779099			0.0475627	-0.0233475	0.0190253	0.0780231
	-0.0182178	-0.0156248	0.0705491	-0.00952731			0.0538694	-0.0091554	-0.00138957	0.0563363
	-0.021043	-0.0246137	0.0400567	-0.0225868			0.0434436	-0.0122347	-0.00680482	0.0371657
	-0.00658512	-0.0220005	-0.0158492	-0.0242617			0.0296245	-0.0322577	-0.00955518	0.0150653
	0.00940182	-0.0336725	-0.0561316	-0.00530067			0.0194264	-0.0548096	-0.0194776	-0.0174805
	0.00120438	-0.0565378	-0.068038	0.0250227			0.0110214	-0.0540502	-0.0321187	-0.047491
	-0.0276335	-0.0747041	-0.0569644	0.0553553			0.00966605	-0.00625897	-0.0413333	-0.0660649
	-0.0464972	-0.0799053	-0.0415805	0.0718131			0.023001	0.058593	-0.0396268	-0.070792
	-0.0403973	-0.0624928	-0.042046	0.0661962			0.0504655	0.0751549	-0.0234937	-0.053984
	-0.0228732	-0.0303779	-0.048184	0.0477158			0.0833796	0.0373798	-0.00616446	-0.0224121
	-0.0106171	-0.0220738	-0.0281785	0.0371373			0.104335	-0.00386312	0.00153755	-0.00785136
	-0.0151942	-0.0482969	0.0186408	0.0376268			0.0938925	-0.0169504	0.00861479	-0.0246611
	-0.0365589	-0.0734665	0.0586868	0.0411347			0.0483139	-0.0077086	0.0202555	-0.0546977
	-0.0529791	-0.0752782	0.0637161	0.0392138			-0.00691694	0.00643479	0.0228631	-0.080926
	-0.0506718	-0.0651584	0.0342	0.0282918			-0.0368153	0.00736971	0.0105116	-0.0960036
	-0.0463963	-0.0585667	-0.00572891	0.0155204			-0.0358089	-0.00269345	-0.0106613	-0.0857255
	-0.0572272	-0.0657599	-0.0225837	0.0252568			-0.0231316	0.00120186	-0.0336433	-0.0508
	-0.0756815	-0.0818987	-0.00505205	0.0618965			-0.0112465	0.0240847	-0.0476433	-0.014006
	-0.0875103	-0.0827946	0.021834	0.0945668			-0.00762363	0.0382428	-0.0472122	0.0180868
	-0.0839458	-0.058558	0.0311811	0.096377			-0.0175848	0.0255912	-0.0456174	0.0531332
	-0.0581971	-0.0330602	0.0290134	0.0738206			-0.0261698	-0.000499423	-0.0574192	0.0816375
	-0.0211812	-0.0298215	0.0345912	0.0452507			-0.0245968	-0.017921	-0.0661422	0.0856147
	0.000823827	-0.0407384	0.0545632	0.0335012			-0.0298139	-0.0179224	-0.045733	0.070494
	0.00717232	-0.0395345	0.0781321	0.0479578			-0.0451599	-0.00703752	-0.00149768	0.0505038
	0.0178322	-0.0112686	0.0787599	0.0667599			-0.0437851	-0.00428288	0.0420454	0.0300499
	0.0316277	0.0323026	0.0403074	0.0625282			-0.0228634	-0.0224656	0.0653527	0.0134039
	0.0347119	0.0592678	-0.0156067	0.0404427			-0.00409583	-0.0423961	0.0546372	0.00771391
	0.0249694	0.0517236	-0.0476408	0.0229795			0.0144016	-0.0309721	0.0110779	0.0129524
	0.00370169	0.0301861	-0.0455568	0.0293197			0.0387332	0.0108378	-0.0295471	0.0284294
	-0.0213553	0.0289773	-0.0279219	0.0556973			0.0478654	0.0424625	-0.0440711	0.0529826
	-0.0253128	0.053542	-0.0134505	0.0737001			0.0410585	0.0371838	-0.0508594	0.0722078
	0.00459072	0.0724857	0.00123703	0.0606245			0.0438938	0.00791431	-0.0624096	0.0658086
	0.0405122	0.0568957	0.0322705	0.032225			0.0471946	-0.0121804	-0.0672594	0.03989
	0.0479405	0.00911363	0.081755	0.0210091			0.0288342	-0.00159815	-0.0598977	0.0231408
	0.0283361	-0.0409748	0.12251	0.0293655			0.00847375	0.0299675	-0.0413443	0.0265931
	0.00307853	-0.0626234	0.124249	0.0361459			0.0133412	0.0518148	-0.0135939	0.0359203
	-0.0140144	-0.0542657	0.0846991	0.0177977			0.0276247	0.0469417	0.00591118	0.0391805
	-0.0183132	-0.0434193	0.0247209	-0.0185239			0.040966	0.03616	0.00288974	0.0283339
	-0.013273	-0.0528259	-0.0298347	-0.0397453			0.0617241	0.048556	-0.00567115	0.00408072
	-0.00715919	-0.0756679	-0.0643174	-0.0203539			0.0676495	0.0750229	-0.000304969	-0.0144762
	-0.00143555	-0.0821548	-0.0759517	0.0201917			0.0419086	0.0868957	0.0131319	-0.0111016
	0.0159701	-0.059428	-0.0617771	0.0394527			0.0132854	0.0782921	0.0195477	0.00150676
	0.0439747	-0.0256651	-0.0219547	0.0232932			0.00358827	0.0588176	0.0150349	0.00373264
	0.0544195	0.000456526	0.0315376	-3.4536e-05			-0.00829372	0.0380549	0.00677298	-0.00184521
	0.0318202	0.0175659	0.0768436	0.00139502			-0.0331124	0.0398618	0.0091509	-0.00933031
	-0.00696608	0.0285078	0.0975694	0.0312743			-0.055282	0.0715801	0.0325249	-0.0199848
	-0.0362287	0.0394901	0.087075	0.0591644			-0.0692396	0.0884678	0.0588116	-0.0253397
	-0.0468346	0.0562841	0.0572028	0.0511431			-0.0674475	0.0605072	0.0555118	-0.0142901
	-0.0410425	0.0616806	0.0376157	0.00517194			-0.03944	0.0178779	0.0229186	0.00403264
	-0.0247889	0.0414654	0.0458085	-0.0408172			-0.00157312	-0.00865455	0.000642571	0.0191888
	-0.00894425	0.0212648	0.0687269	-0.0612881			0.0120314	-0.0222574	0.00818274	0.0368523
	0.00444087	0.0213934	0.0818839	-0.0563329			0.00246992	-0.0270113	0.0238216	0.0518876
	0.0245317	0.0235255	0.0802845	-0.0439034			-0.00220364	-0.0293618	0.0236749	0.0435992
	0.0429787	0.018667	0.072929	-0.0392387			0.00731036	-0.0377487	-0.000830578	0.0187507
	0.0327264	0.0183878	0.0717418	-0.0335586			0.0167716	-0.0243141	-0.0412266	0.000793878
	-0.0104605	0.0180315	0.0822519	-0.00152844			0.0128415	0.0357024	-0.0706695	-0.0115927
	-0.0601776	0.0196227	0.0915979	0.0579701			0.00189608	0.0963438	-0.0698897	-0.0242574
	-0.0922558	0.0456923	0.0805943	0.103131			0.00148374	0.0974412	-0.0476618	-0.0290448
	-0.0936807	0.0861451	0.0571107	0.0994055			0.0252273	0.0535981	-0.0269981	-0.0331566
	-0.0578219	0.0937493	0.0440132	0.0489603			0.0584932	0.0211748	-0.0199987	-0.0463393
	1.92855e-05	0.054139	0.0468875	-0.00786735			0.0668839	0.0256286	-0.0266512	-0.0527493
	0.0471441	0.00353847	0.0581843	-0.0241125			0.041836	0.0607815	-0.0393675	-0.0363977
	0.0709639	-0.0241619	0.0699445	2.68841e-05			0.00932336	0.0933078	-0.050705	-0.0134862
	0.0738281	-0.0121629	0.0662706	0.0116729			-0.0021813	0.0788698	-0.0614769	-0.000873762
	0.0567529	0.0343299	0.0422945	-0.019902			0.00808627	0.0247332	-0.0746152	0.00438914
	0.0325302	0.0751157	0.0156687	-0.0647726			0.021353	-0.00806726	-0.0871846	0.00564197
	0.0139903	0.0721783	-0.002157	-0.0739993			0.0222576	0.00611455	-0.0853747	0.000831938
	-0.000330434	0.0396865	-0.0205156	-0.0397067			0.00950227	0.0270674	-0.067716	-0.00654265
	-0.00645101	0.0156741	-0.041227	0.00155558			-0.00378644	0.0165945	-0.0567583	-0.0199222
	0.0123223	0.00710721	-0.0503803	0.00387266			-0.00665144	-0.0249689	-0.0640574	-0.0453429
	0.0524796	0.00282094	-0.0363172	-0.0353136			-0.00591352	-0.06986	-0.0726725	-0.0648888
	0.0846272	-0.0046286	-0.00333138	-0.0701323			-0.0169689	-0.0788903	-0.0668309	-0.055833
	0.0950429	-0.0239458	0.0271698	-0.0603786			-0.035038	-0.042334	-0.0509188	-0.032102
	0.0905267	-0.043752	0.0322535	-0.0314465			-0.040561	-0.00218348	-0.0355674	-0.0266492
	0.0788902	-0.0368644	0.0130272	-0.035998			-0.025817	-0.00319991	-0.0326505	-0.0434327
	0.073396	-0.00714214	-0.00538363	-0.0851169			0.00328736	-0.0362918	-0.0488823	-0.0666432
	0.0785706	0.0135678	-0.00681472	-0.13603			0.0372512	-0.063527	-0.0610162	-0.086788
	0.077191	0.0182065	-0.00186146	-0.145009			0.0499893	-0.0656595	-0.0430261	-0.0965561
	0.0615346	0.0266914	-0.0120751	-0.104572			0.0225732	-0.049193	-0.00404891	-0.0930168
	0.0548929	0.0504977	-0.0361222	-0.0526044			-0.0163562	-0.029878	0.023631	-0.0846779
	0.0735709	0.077417	-0.055096	-0.0346461			-0.0327794	-0.0174647	0.0291326	-0.0719146
	0.101724	0.0814894	-0.056382	-0.0521893			-0.0406479	-0.00775293	0.0240885	-0.046022
	0.120379	0.0521303	-0.0460196	-0.0649128			-0.0613515	0.0155382	0.018017	-0.0100518
	0.120148	0.0152291	-0.0360542	-0.0439713			-0.0870435	0.0539426	0.0138682	0.0163787
	0.0969777	0.00845653	-0.0322879	0.00100876			-0.109692	0.0839567	0.00174331	0.0224877
	0.067756	0.0293708	-0.0308616	0.0386772			-0.116734	0.0854848	-0.0366736	0.00621115
	0.0558674	0.040433	-0.0281732	0.0374264			-0.0806714	0.0695995	-0.0957112	-0.0328576
	0.051866	0.0200985	-0.0283717	0.00671263			-0.0136378	0.0577417	-0.134339	-0.0794799
	0.0323675	-0.00873577	-0.0339536	-0.0150895			0.0222245	0.0543641	-0.125922	-0.0997577
	0.00196422	-0.0062053	-0.0411762	-0.00771079			0.0110935	0.0521682	-0.0873012	-0.0776667
	-0.0171727	0.0389611	-0.0463866	0.00697604			-0.00155747	0.0414659	-0.0399448	-0.0317017
	-0.0190008	0.0956443	-0.0527704	0.00134496			0.00127653	0.0144511	0.00217842	0.0145425
	-0.0115813	0.117216	-0.0676538	-0.0287791			0.00553674	-0.0101766	0.0241642	0.0526777
	0.000227375	0.0853265	-0.0864695	-0.0645573			0.0108929	-0.000584784	0.0278548	0.0753376
	0.0101118	0.0330831	-0.0947891	-0.0811995			0.0134081	0.0361344	0.028349	0.0745314
	0.0100611	0.00877624	-0.0885723	-0.0765768			0.000710925	0.0562189	0.0197832	0.0536159
	0.00729004	0.021231	-0.0746647	-0.0771037			-0.00283123	0.0438732	-0.0110781	0.0167131
	0.0166604	0.0337295	-0.0482327	-0.0919216			0.030417	0.023455	-0.0473368	-0.0268328
	0.0385572	0.0158677	-0.0102934	-0.100681			0.0582766	0.0174191	-0.0657973	-0.0472835
	0.0543654	-0.0172163	0.0161091	-0.0828304			0.0349884	0.0374572	-0.0613403	-0.023112
	0.0508931	-0.0311841	0.015704	-0.0536093			-0.0188749	0.0740136	-0.0443381	0.0269958
	0.0322863	-0.0134001	-0.00407022	-0.0424195			-0.0640122	0.0836304	-0.0337642	0.066725
	0.00657122	0.023275	-0.0234673	-0.0666116			-0.0874279	0.0414941	-0.0465839	0.078275
	-0.0148265	0.0485754	-0.0255883	-0.102539			-0.0817372	-0.0074801	-0.0768083	0.0569201
	-0.0254884	0.0408057	-0.0120741	-0.0994275			-0.0525751	-0.014121	-0.0996093	0.00983359
	-0.0386709	0.0211521	-0.00660555	-0.0380162			-0.0277655	0.00494546	-0.1081	-0.0323741
	-0.0651217	0.0270576	-0.01559	0.0327184			-0.0113475	0.0176409	-0.119353	-0.0475863
	-0.0845891	0.0479574	-0.0170124	0.048828			0.018027	0.0186492	-0.136772	-0.0471704
	-0.0692844	0.0470397	-0.00251729	0.00557894			0.055877	0.00682663	-0.140196	-0.0438421
	-0.0281137	0.0247466	0.00788686	-0.0483335			0.0680426	-0.0073984	-0.116545	-0.0273855
	0.010755	0.00222004	-0.00805939	-0.0562391			0.0403432	0.00169313	-0.072582	-7.33812e-05
	0.037538	-0.00895544	-0.0596156	-0.0149618			-0.00940004	0.0246625	-0.0195706	0.0214077
	0.0537116	0.00233807	-0.133609	0.0199606			-0.0508945	0.0175598	0.0215937	0.0324147
	0.0589644	0.0290301	-0.185093	0.00489959			-0.058321	-0.0164713	0.0285831	0.0366734
	0.0593774	0.0336448	-0.168835	-0.0443144			-0.0340323	-0.0323638	0.00507201	0.0282238
	0.0529085	0.00732473	-0.0974323	-0.0898494			-0.00157733	-0.0177496	-0.0277088	0.0200729
	0.0227853	-0.015552	-0.0256982	-0.114885			0.0216293	0.00627371	-0.0570432	0.0338726
	-0.0270439	-0.0186993	0.0167289	-0.125118			0.0347699	0.0221765	-0.0842457	0.0548208
	-0.0646204	-0.0163565	0.0404789	-0.136953			0.02981	0.0156472	-0.11022	0.0535779
	-0.0679754	-0.012923	0.0604334	-0.156141			-0.0119024	-0.0128049	-0.128832	0.0363093
	-0.0442615	-0.00555101	0.0792339	-0.151601			-0.0780523	-0.0262285	-0.128106	0.0248281
	-0.012068	-0.00454693	0.0807747	-0.104224			-0.12838	-0.00411436	-0.0989148	0.0197591
	0.00585619	-0.00929556	0.0446175	-0.0383043			-0.136647	0.020971	-0.050303	0.0155867
	-0.00272061	-0.00635131	-0.0160395	0.0043083			-0.108967	0.0246903	-0.0116663	0.0114174
	-0.0175228	-0.00749624	-0.0549295	0.00849247			-0.060464	0.0212472	-0.00874318	-0.00185067
	-0.0174152	-0.0304808	-0.051467	-0.0138782			-0.00694323	0.0224677	-0.0320686	-0.0244166
	-0.011235	-0.0595679	-0.0315809	-0.0267551			0.0309445	0.0207519	-0.0534244	-0.0356224
	-0.0121672	-0.0675116	-0.0260396	-0.00472431			0.0426409	0.0137275	-0.0711081	-0.0357884
	-0.0168115	-0.0514355	-0.0426543	0.0348216			0.0399494	0.0016881	-0.0933269	-0.0525713
	-0.0176452	-0.0203137	-0.0625274	0.0452875			0.0364057	-0.0155982	-0.113604	-0.089298
	-0.0105562	0.0115308	-0.0617727	0.0164918			0.0302678	-0.0218096	-0.121636	-0.115819
	0.00579241	0.0234734	-0.0361156	-0.0163455			0.0177592	-0.00530928	-0.109378	-0.111818
	0.0172402	0.0171029	-0.00897948	-0.0201794			-0.00206334	0.0129938	-0.0714575	-0.0727712
	0.00543428	0.0143652	-0.00345255	0.00526704			-0.0266149	0.000870035	-0.0333205	-0.00718206
	-0.0166538	0.0173197	-0.0194419	0.0287628			-0.0384727	-0.0402924	-0.0386662	0.0523783
	-0.0205277	0.00994333	-0.0370446	0.0137546			-0.0179128	-0.0825105	-0.0834162	0.0701439
	-0.00692158	-0.0150241	-0.0343516	-0.0381499			0.0174781	-0.101459	-0.124519	0.0576774
	0.00538026	-0.0533298	-0.00134603	-0.0758853			0.0325512	-0.0888655	-0.137619	0.0496959
	0.00585739	-0.0868381	0.0482894	-0.070442			0.0310676	-0.05726	-0.126198	0.0562398
	-0.00957755	-0.0915666	0.0831984	-0.0496392			0.031266	-0.0360998	-0.10371	0.0655222
	-0.0326273	-0.0652027	0.0827939	-0.0543213			0.0273553	-0.0438013	-0.0889833	0.0653955
	-0.038307	-0.0317028	0.0559565	-0.0833496			0.0211688	-0.063677	-0.0891881	0.0485755
	-0.016874	-0.0141259	0.0212913	-0.094455			0.0261908	-0.0651137	-0.0830858	0.0233789
	0.00750097	-0.0148703	-0.0144839	-0.0395901			0.0297404	-0.0460227	-0.0616938	0.0116665
	0.0173262	-0.0198516	-0.058564	0.0728468			0.0221053	-0.0305899	-0.0544126	0.0163148
	0.0233062	-0.0210143	-0.11204	0.165624			0.0304398	-0.0360396	-0.0825087	0.0152613
	0.0325707	-0.0278813	-0.156482	0.174215			0.0623781	-0.055003	-0.127385	-0.00265248
	0.0413329	-0.0572021	-0.169976	0.110668			0.0820009	-0.0643618	-0.159701	-0.020516
	0.0506753	-0.103114	-0.151927	0.0298274			0.0773134	-0.0447642	-0.1654	-0.0232031
	0.0570292	-0.131919	-0.112432	-0.021391			0.0682067	-0.00787041	-0.140807	-0.0162129
	0.0499459	-0.111431	-0.055431	-0.0439776			0.047698	0.00778028	-0.109203	-0.00919657
	0.0279838	-0.048965	0.0111881	-0.0710377			0.0139852	-0.00638033	-0.100933	-0.00732955
	0.00457264	0.010237	0.075828	-0.125992			-0.0018647	-0.0145588	-0.112004	-0.00955385
	-0.0129352	0.0349264	0.123369	-0.178944			0.00955288	0.00200322	-0.116373	-0.00402569
	-0.0307957	0.03592	0.131629	-0.179929			0.0250632	0.0244097	-0.110921	0.0212978
	-0.046307	0.0337661	0.0862614	-0.113714			0.044092	0.0383498	-0.109958	0.0512492
	-0.0454826	0.0285188	0.00764676	-0.014405			0.0756464	0.0418205	-0.117092	0.0544921
	-0.0213677	0.0121411	-0.0675494	0.0644794			0.0874401	0.0276252	-0.128501	0.0283388
	0.0184454	-0.0142596	-0.110558	0.0941348			0.0563245	0.00923924	-0.128361	-0.00437544
	0.0566539	-0.0455473	-0.109116	0.0858182			0.00749674	0.0133801	-0.0913142	-0.0217919
	0.0744636	-0.0683174	-0.0816416	0.0684061			-0.0338459	0.0271317	-0.0215128	-0.0144372
	0.0602663	-0.0597282	-0.0607588	0.0483192			-0.0582	0.0228003	0.036099	0.0147845
	0.0311502	-0.025792	-0.0479699	0.0132087			-0.0523267	0.00684484	0.039253	0.0445146
	0.0192657	-0.00439695	-0.0232129	-0.0330682			-0.020008	-0.00424706	-0.0089762	0.0618908
	0.0250162	-0.012774	0.00883469	-0.0639702			0.00242516	-0.0113609	-0.0741783	0.0831965
	0.0213903	-0.0319707	0.02386	-0.0601182			-0.00155864	-0.00314931	-0.124237	0.119859
	-0.000572315	-0.0439191	0.0135337	-0.0301092			-0.013976	0.0219064	-0.147355	0.142846
	-0.0243422	-0.0362486	-0.0131746	-0.00290531			-0.018078	0.0280376	-0.154825	0.128185
	-0.0380034	-0.00422318	-0.0351832	0.000895435			-0.0156094	-0.000325086	-0.162227	0.0909803
	-0.0408274	0.0224792	-0.0361765	-0.00427208			-0.0122992	-0.0244846	-0.169778	0.05628
	-0.0419222	0.00957831	-0.0262088	0.0115436			-0.0128811	-0.0206529	-0.169236	0.0380793
	-0.0581292	-0.0241583	-0.0318442	0.0452432			-0.0208859	-0.00989672	-0.164736	0.0453364
	-0.0894873	-0.0419725	-0.051237	0.0715113			-0.0227144	-0.00929781	-0.169007	0.0646456
	-0.102116	-0.0476656	-0.0552046	0.0620593			-0.00817967	-0.0195481	-0.183158	0.0640426
	-0.0731279	-0.0539131	-0.0372233	0.0120593			0.0134829	-0.0393102	-0.191745	0.0441549
	-0.0245101	-0.05283	-0.0221035	-0.0458696			0.0221808	-0.045317	-0.178734	0.0367777
	0.0095295	-0.045073	-0.0331294	-0.0641688			0.0129828	-0.0146775	-0.139475	0.0498389
	0.012494	-0.0338036	-0.0684891	-0.0456788			4.05235e-05	0.0287498	-0.0864392	0.0712395
	-0.00836999	-0.0124325	-0.10324	-0.0353874			-0.0046741	0.0451832	-0.0452023	0.0983812
	-0.0263038	0.0088705	-0.0996774	-0.0613286			0.0016156	0.0438535	-0.0402791	0.117235
	-0.0181028	0.00147624	-0.0490485	-0.109704			0.00852355	0.0527608	-0.0642892	0.105918
	0.00858121	-0.0316795	0.0117874	-0.145451			0.000712574	0.0686376	-0.087063	0.0764477
	0.0282299	-0.0567561	0.0495305	-0.139679			-0.0201385	0.0771738	-0.0964802	0.0619402
	0.0400652	-0.0641431	0.0689463	-0.106127			-0.0323386	0.0725768	-0.109913	0.0671474
	0.0574738	-0.0675095	0.0841157	-0.0959112			-0.0200156	0.0568767	-0.133204	0.0841266
	0.0768285	-0.0732149	0.097568	-0.131924			0.00917888	0.0458476	-0.147915	0.110977
	0.082882	-0.0803885	0.103362	-0.177624			0.0393446	0.0576988	-0.137334	0.139461
	0.0607142	-0.0810446	0.0909075	-0.184762			0.0608628	0.0781734	-0.0924882	0.154041
	0.00919332	-0.0585219	0.0597471	-0.145745			0.0665178	0.0767267	-0.028771	0.159391
	-0.0422535	-0.0163297	0.0336449	-0.0867744			0.0563442	0.0507939	0.00865955	0.160696
	-0.0568857	0.0126521	0.0331544	-0.043219			0.0396901	0.0220323	-0.00856774	0.148851
	-0.0410054	0.00919856	0.0494191	-0.0361281			0.0129106	0.00507608	-0.0579991	0.122369
	-0.0358214	-0.0132638	0.0630983	-0.0535243			-0.0331709	-0.00257953	-0.104951	0.0954738
	-0.0574585	-0.0366284	0.0706511	-0.0683969			-0.0737232	-0.0116599	-0.139533	0.0741631
	-0.0849514	-0.0496208	0.0804909	-0.0766311			-0.0688	-0.0279787	-0.159952	0.0564513
	-0.0932802	-0.0491469	0.0977346	-0.0870283			-0.0227145	-0.0426011	-0.172516	0.0472657
	-0.0663389	-0.0463743	0.10926	-0.0959547			0.0266314	-0.0318723	-0.186879	0.0475351
	-0.0140158	-0.0510793	0.0930593	-0.09019			0.0617281	0.0173932	-0.186997	0.0485035
	0.0240541	-0.0540194	0.0450944	-0.058811			0.0735979	0.0832469	-0.148336	0.0487919
	0.0237716	-0.0459435	-0.00202776	-0.00412597			0.0530835	0.120591	-0.0861064	0.0544092
	0.00704063	-0.0268714	-0.00716821	0.0379363			0.0224877	0.106388	-0.0485218	0.0632044
	0.00433922	-0.0053675	0.034953	0.0329604			0.0115544	0.0565384	-0.053717	0.0673776
	0.0134388	0.00583911	0.0928014	-0.0113285			0.0069353	0.00428812	-0.0844682	0.0694388
	0.0141405	-0.000797008	0.127635	-0.0465388			-0.000871027	-0.02177	-0.113605	0.0743147
	-0.000975889	-0.0164904	0.124822	-0.0458542			0.0142478	-0.0171153	-0.116056	0.0761216
	-0.0256535	-0.021801	0.100729	-0.0195239			0.0556609	-0.00747971	-0.0896036	0.0709324
	-0.0446105	-0.00918831	0.0839159	-0.00304561			0.0876985	-0.0119744	-0.0657476	0.0681673
	-0.0395845	0.00854169	0.0825348	-0.01869			0.0942645	-0.0147877	-0.0686287	0.0732313
	-0.0158945	0.0115075	0.0837736	-0.045604			0.0830154	0.000562641	-0.0780416	0.0780852
	-0.00102565	-0.00271751	0.0746619	-0.0446651			0.0466757	0.0149487	-0.0712039	0.0773311
	-0.00615586	-0.0166451	0.0573757	-0.00760371			-0.00163325	0.0101223	-0.0579106	0.063846
	-0.0111658	-0.0200484	0.0547735	0.037801			-0.0249543	-0.00374935	-0.0517117	0.028916
	0.00414967	-0.0178926	0.0871074	0.060369			-0.0234687	-0.0175079	-0.0590456	-0.0183196
	0.0291838	-0.0153468	0.138465	0.0459445			-0.0180281	-0.0285148	-0.0767831	-0.0464317
	0.0428171	-0.019169	0.171195	0.00468806			-4.03394e-05	-0.0304507	-0.0851565	-0.0410123
	0.0332126	-0.0316671	0.166755	-0.0374275			0.0385364	-0.0338953	-0.0648366	-0.00885484
	0.00326814	-0.0374568	0.138538	-0.0651111			0.0668453	-0.0614309	-0.0350856	0.0381462
	-0.0229599	-0.0252647	0.111894	-0.0822047			0.0703645	-0.0927231	-0.0306228	0.0761505
	-0.0169621	-0.0151365	0.104934	-0.0929737			0.0680924	-0.0889617	-0.0517411	0.0717022
	0.0175217	-0.0302458	0.106953	-0.0926685			0.0633051	-0.0597617	-0.0762806	0.0270193
	0.0352092	-0.0608359	0.0992199	-0.0737822			0.0470332	-0.033684	-0.0925698	-0.0203686
	0.00733145	-0.0853574	0.0881657	-0.0395654			0.0281373	-0.0118492	-0.101138	-0.0452856
	-0.0385722	-0.095218	0.0926522	-0.00142743			0.018984	0.00689166	-0.106423	-0.048981
	-0.0590414	-0.0830939	0.108813	0.0202069			0.0140046	0.0178596	-0.114436	-0.0373284
	-0.0446301	-0.0535627	0.116934	0.0221055			0.0135988	0.0370373	-0.120015	-0.0224308
	-0.0155685	-0.0323858	0.105818	0.0165449			0.020134	0.0683444	-0.106633	-0.0148683
	-0.00193452	-0.0270515	0.077981	0.0199454			0.026502	0.0765058	-0.0722363	0.000258668
	-0.0186159	-0.0161383	0.0537734	0.034441			0.0264414	0.0497983	-0.0384099	0.0385904
	-0.039674	0.000897873	0.0598245	0.0572396			0.0260611	0.0198775	-0.0189641	0.0720745
	-0.0282742	0.00567303	0.0972961	0.0782371			0.029954	0.0078953	-0.000770637	0.0654382
	0.0124072	0.00309142	0.134087	0.0862054			0.0313931	0.00395751	0.0350139	0.0305651
	0.0484492	0.00268803	0.148273	0.0827367			0.0325784	0.00333797	0.0829406	-0.00302667
	0.0629014	-0.00692977	0.152963	0.0693419			0.0417568	0.000484239	0.11457	-0.0190786
	0.0593652	-0.0212072	0.168527	0.0364824			0.0586032	-0.016464	0.0964527	-0.00625855
	0.0457681	-0.0165403	0.196234	-0.00966895			0.0711635	-0.0300994	0.0251128	0.0320303
	0.0370532	0.00266647	0.220046	-0.0421454			0.0691277	-0.013409	-0.0551264	0.0633425
	0.0350514	0.0196705	0.214165	-0.0436305			0.0561917	0.0209777	-0.0894843	0.0742399
	0.0276248	0.0345105	0.168541	-0.0177536			0.0409108	0.0389248	-0.0738634	0.0851996
	0.0201382	0.0412576	0.114269	0.0186189			0.0324015	0.0387077	-0.053994	0.104549
	0.0319584	0.027377	0.0899731	0.0349855			0.0288666	0.0331523	-0.0617561	0.114314
	0.061507	0.00663087	0.0908475	0.011013			0.0154368	0.0211305	-0.0825203	0.110616
	0.083435	0.00420943	0.0866894	-0.0364687			-0.0127541	0.00369027	-0.083759	0.102481
	0.0801672	0.0160639	0.0632159	-0.0740126			-0.0383929	-0.0176124	-0.0533508	0.0935555
	0.0485139	0.0269361	0.0329827	-0.0877875			-0.0450467	-0.045652	-0.0124231	0.0945484
	0.00146528	0.0323058	0.0202342	-0.0825403			-0.0334786	-0.0702864	0.000463298	0.116246
	-0.0267747	0.0271039	0.0362936	-0.0696051			-0.00642507	-0.0730847	-0.0337675	0.138163
	-0.0206311	0.0136558	0.0551045	-0.0618319			0.0283346	-0.0550965	-0.0855364	0.132274
	-0.00776504	0.00628217	0.0480791	-0.0545731			0.0458581	-0.0367944	-0.111935	0.106278
	-0.0123501	0.00853827	0.0287748	-0.0320872			0.0326621	-0.0295402	-0.108973	0.0869527
	-0.0252179	0.008458	0.0395626	0.00614193			0.0127598	-0.0292843	-0.0983861	0.0813528
	-0.0320937	0.004877	0.0945968	0.0304344			0.00400016	-0.0251979	-0.0940133	0.0852813
	-0.0288424	0.00343274	0.158883	0.020181			-0.00178557	-0.00911886	-0.0972535	0.0900983
	-0.0145092	0.00236899	0.181122	-0.0160707			-0.00414578	0.0206776	-0.105551	0.0850577
	-0.000422436	-0.00367265	0.141236	-0.0471238			0.00339366	0.0497053	-0.105448	0.0748889
	-0.00598339	-0.0183317	0.0702176	-0.0533812			0.00785585	0.0576294	-0.098806	0.0796053
	-0.0231883	-0.0454374	0.017868	-0.0357765			0.00951024	0.0468189	-0.10525	0.101551
	-0.0261851	-0.0749589	0.00907123	-0.0192234			0.0335461	0.0356616	-0.123754	0.120603
	-0.013629	-0.0853825	0.0266036	-0.0131412			0.0700356	0.0225965	-0.127387	0.125088
	-0.00161822	-0.0706923	0.0380425	0.00436105			0.0815772	-0.00690656	-0.103521	0.122952
	0.00127161	-0.0467064	0.0340384	0.0492831			0.0721755	-0.0456232	-0.0663596	0.125835
	-0.00658729	-0.0352472	0.0351694	0.102845			0.0690758	-0.0695255	-0.0354989	0.135491
	-0.0174593	-0.0458663	0.0613781	0.126702			0.0663167	-0.0649012	-0.0296505	0.147086
	-0.0135177	-0.0634567	0.105413	0.0950842			0.0610014	-0.0325295	-0.0480233	0.146882
	0.00715081	-0.0628699	0.140723	0.016938			0.0690851	0.00683903	-0.0501057	0.121863
	0.0158717	-0.0374703	0.145655	-0.0642107			0.0742911	0.0164073	-0.00282217	0.0794837
	-0.0100696	-0.00556983	0.120405	-0.114103			0.0530152	-0.0136089	0.0662022	0.0491966
	-0.0483323	0.00695491	0.0826366	-0.136643			0.0279631	-0.0486556	0.0988557	0.0433752
	-0.0645789	-0.00706943	0.0427015	-0.140973			0.0263093	-0.0557428	0.076551	0.0497784
	-0.0547622	-0.0291646	-0.00156939	-0.126588			0.0293762	-0.0441089	0.0231913	0.0593955
	-0.0377074	-0.0347665	-0.0466272	-0.100442			0.0250032	-0.0301237	-0.0277566	0.0729952
	-0.0275022	-0.0240716	-0.0662711	-0.070857			0.0279951	-0.0161542	-0.0509704	0.085311
	-0.0226518	-0.0128111	-0.0382232	-0.0419336			0.0315816	-0.00976203	-0.0492426	0.0934928
	-0.0190573	-0.00569652	0.028678	-0.0187125			0.0233716	-0.00844961	-0.0472584	0.0929588
	-0.0113616	-0.00319393	0.0966249	-0.00895262			0.0161241	0.00620711	-0.0505016	0.0686544
	-0.00341265	-0.00563508	0.124365	-0.00841738			0.0211484	0.0232186	-0.0358779	0.0211106
	-0.0133265	0.000527585	0.0994	-0.0111933			0.0258201	0.00813173	-0.00114614	-0.011522
	-0.0425538	0.0199751	0.0493339	-0.00682445			0.0320939	-0.0311062	0.0233634	-0.00144471
	-0.0612109	0.0305183	0.0116181	0.0111257			0.0530653	-0.0576031	0.0136453	0.0316965
	-0.0444709	0.0193696	-0.0134122	0.0388291			0.0759427	-0.0661562	-0.0268175	0.0578464
	-0.00836682	0.00716189	-0.0454887	0.0589052			0.078556	-0.0622149	-0.0719104	0.071021
	0.0156385	0.00881941	-0.0790734	0.062059			0.063472	-0.0458571	-0.0839084	0.0735562
	0.0183768	0.0173548	-0.0859609	0.0492571			0.0453441	-0.0375981	-0.0493184	0.0748862
	0.00839228	0.0303008	-0.0520273	0.0185239			0.030083	-0.0513709	-0.00217517	0.0956758
	0.00411957	0.0407329	0.00889392	-0.0267118			0.0236285	-0.0534367	0.00929689	0.124946
	0.0229	0.0313265	0.0614919	-0.0712689			0.0249239	-0.0203889	-0.017223	0.125707
	0.0520662	0.013564	0.0708905	-0.100438			0.023036	0.0145031	-0.0419998	0.0955438
	0.0616728	0.0178953	0.0426051	-0.104447			0.015982	0.024147	-0.0351677	0.0692351
	0.0549179	0.0376955	0.0219135	-0.0846911			0.0138834	0.020027	-0.0068554	0.0627688
	0.0566979	0.047606	0.0367747	-0.0592214			0.0237822	0.0149205	0.0125556	0.0803632
	0.0690946	0.0478167	0.0697414	-0.0494041			0.0341368	0.00887846	0.00094164	0.124999
	0.0742915	0.0428327	0.0908184	-0.0486603			0.0308414	0.0103572	-0.0347466	0.17295
	0.0613443	0.0246808	0.0880016	-0.0434551			0.0117097	0.0176056	-0.0607174	0.194561
	0.029711	0.00240244	0.067258	-0.0347175			-0.0126912	0.0152707	-0.0585927	0.203348
	-0.00648344	-0.0062742	0.056026	-0.0247483			-0.0292332	0.0102623	-0.0475748	0.220058
	-0.0186032	-0.0108728	0.0745347	-0.0198548			-0.0342693	0.0180064	-0.0453528	0.228525
	-0.00384917	-0.0197411	0.103021	-0.0378422			-0.0320914	0.0263609	-0.0432688	0.211753
	0.00920434	-0.0197878	0.10479	-0.0758476			-0.0314725	0.016428	-0.0264891	0.184264
	0.00614776	-0.00882715	0.0817482	-0.0962616			-0.0303725	-0.00560882	0.00207395	0.162879
	-0.0035915	0.00364021	0.0645254	-0.076862			-0.0227006	-0.0256858	0.0258051	0.153557
	-0.0095143	0.0196764	0.0670499	-0.0257478			-0.0161471	-0.0388653	0.0234033	0.15882
	-0.00624018	0.040477	0.0733666	0.0331006			-0.0203583	-0.0359929	-0.0129411	0.164174
	0.00745737	0.0512362	0.0595846	0.0688408			-0.027032	-0.016501	-0.0515684	0.143162
	0.0189107	0.0450625	0.0222653	0.0589845			-0.0288528	0.00320422	-0.0532975	0.105597
	0.0133138	0.0263241	-0.00656523	0.0240466			-0.0312698	0.00783902	-0.0241421	0.0893425
	-0.000646047	-0.00444169	0.00991673	0.0010819			-0.0320325	0.000684892	-0.0137937	0.102228
	-0.00814105	-0.0379202	0.0649101	0.00183614			-0.024499	-0.00470832	-0.041134	0.122883
	-0.00782313	-0.0498962	0.119497	0.00823946			-0.0175231	-0.00300571	-0.0780803	0.142064
	0.00428364	-0.0315063	0.143245	0.00350489			-0.0153729	0.00109534	-0.0932221	0.158959
	0.0248571	-0.00148994	0.130956	-0.017431			-0.0024221	0.000567125	-0.0763857	0.165795
	0.02789	0.0145077	0.0965647	-0.03885			0.0193174	-0.00842929	-0.0470567	0.164108
	0.00268198	0.00315822	0.0574227	-0.0366609			0.0303952	-0.0206833	-0.0403359	0.155173
	-0.0246328	-0.0256139	0.0188162	-0.00615145			0.0379092	-0.0210559	-0.0631316	0.131062
	-0.0316771	-0.0455033	-0.0239116	0.0316767			0.0549716	-0.00679973	-0.0747201	0.100463
	-0.0274293	-0.0426344	-0.0693229	0.0566011			0.0625579	0.000669545	-0.0474442	0.0951539
	-0.0235242	-0.031074	-0.101538	0.0628522			0.0540531	-0.00440386	-0.0100618	0.127047
	-0.0223267	-0.0329758	-0.10128	0.0477724			0.0549677	-0.00453026	-0.00570187	0.171039
	-0.0270033	-0.0492496	-0.0638062	0.0135732			0.0607747	0.00254332	-0.0501821	0.188409
	-0.0336174	-0.0640112	-0.0112542	-0.0262845			0.0455134	0.00472016	-0.120801	0.160049
	-0.0344479	-0.0631994	0.030535	-0.0614446			0.0234851	0.000987014	-0.166795	0.100306
	-0.0374786	-0.045887	0.0566582	-0.0820621			0.0196066	-0.00680831	-0.149098	0.0496867
	-0.0537066	-0.0264874	0.0775811	-0.0800683			0.0197636	-0.0208705	-0.0871861	0.0391633
	-0.0741801	-0.0192394	0.0936011	-0.0631597			0.0193016	-0.0294564	-0.032838	0.056659
	-0.08145	-0.0233818	0.0970512	-0.0458561			0.0326155	-0.0272597	-0.00454474	0.0588603
	-0.0752352	-0.0209108	0.0820659	-0.027283			0.0378432	-0.0343098	0.011652	0.0289776
	-0.0707508	0.00445242	0.055293	0.00434527			0.0121708	-0.0567299	0.0236753	-0.00525985
	-0.069248	0.0425671	0.0428972	0.0438034			-0.0206005	-0.0661368	0.0283064	-0.0120023
	-0.0629089	0.0652817	0.0644259	0.0785381			-0.0379651	-0.0452637	0.023841	0.0121589
	-0.05454	0.0653743	0.0999802	0.0839435			-0.0557209	-0.012276	0.0102718	0.0568067
	-0.0513006	0.0600555	0.106466	0.0380582			-0.070459	0.0118675	-0.00360311	0.0998326
	-0.0559619	0.0627077	0.0685168	-0.0493396			-0.0579979	0.0149255	-0.00604377	0.122103
	-0.0682976	0.071327	0.00501014	-0.129312			-0.0308535	-0.0176567	-0.00852397	0.134422
	-0.0848551	0.0776018	-0.0508588	-0.155553			-0.0153187	-0.0634314	-0.0378194	0.157736
	-0.0894262	0.0650389	-0.0710834	-0.117697			-0.00971427	-0.0768808	-0.0891875	0.178731
	-0.0707883	0.0288943	-0.056573	-0.0476967			-0.00711531	-0.0615246	-0.120549	0.164021
	-0.0436239	-0.00371851	-0.0335485	0.00454501			-0.015372	-0.0635663	-0.0996881	0.108891
	-0.0236399	-0.0174348	-0.0142301	0.0153888			-0.0299174	-0.091108	-0.0417621	0.0335176
	-0.0076958	-0.0344033	0.0133837	0.000703073			-0.0400837	-0.120465	0.0090725	-0.0293594
	0.00704833	-0.0628965	0.0483865	-0.0186186			-0.0519794	-0.142365	0.0167918	-0.0463347
	0.0119739	-0.0796048	0.0708953	-0.0393452			-0.0646765	-0.140705	-0.0131202	-0.0114981
	0.00742497	-0.0757505	0.0665574	-0.0709812			-0.0629836	-0.107091	-0.0354515	0.0350956
	0.00241182	-0.0585962	0.0289835	-0.10998			-0.0470063	-0.078671	-0.0106382	0.0639219
	-0.0086934	-0.0285435	-0.0300637	-0.139783			-0.0342296	-0.0898969	0.0454214	0.088332
	-0.0345803	0.00148162	-0.0705743	-0.137417			-0.0289785	-0.114915	0.0773771	0.119891
	-0.0634121	0.00741889	-0.0596424	-0.0997456			-0.0250118	-0.116642	0.0531346	0.145152
	-0.0813604	-0.0032713	-0.0150011	-0.0533964			-0.0221994	-0.0940629	-0.00644128	0.16088
	-0.087606	-0.00609793	0.027945	-0.0251855			-0.0190509	-0.0603175	-0.0514353	0.16605
	-0.0778412	-0.00582492	0.055435	-0.0184158			-0.012916	-0.0361506	-0.0450436	0.146829
	-0.055149	-0.0122065	0.068987	-0.021886			-0.00403334	-0.0470791	0.00577069	0.11196
	-0.0379138	-0.0174277	0.074017	-0.0285667			0.00125374	-0.0832497	0.0541789	0.0974361
	-0.0329793	-0.0253621	0.0784908	-0.0318935			0.000935455	-0.100057	0.0623813	0.109477
	-0.0302811	-0.044885	0.0767876	-0.0419758			-0.00122414	-0.0782281	0.0439582	0.125885
	-0.0261022	-0.0592844	0.0555345	-0.0726053			-4.75589e-05	-0.0462617	0.0368574	0.137338
	-0.0258466	-0.0508806	0.0251201	-0.111131			0.00888061	-0.0271425	0.046257	0.145144
	-0.0290016	-0.0387063	0.00977352	-0.130194			0.0213876	-0.0199284	0.0499614	0.148147
	-0.0391105	-0.0392805	0.0126367	-0.125804			0.0273279	-0.0174046	0.0339099	0.157309
	-0.062303	-0.0394063	0.0222044	-0.103897			0.0212168	-0.011355	0.00724201	0.176271
	-0.0838322	-0.032489	0.0347483	-0.0718658			0.00961262	6.68788e-05	-0.00970538	0.176215
	-0.0865772	-0.0258477	0.0483635	-0.0454036			-0.000966712	0.000147827	-0.000529489	0.135269
	-0.0766081	-0.0215714	0.0625264	-0.0347994			-0.0164044	-0.0201885	0.0168229	0.0796962
	-0.0693563	-0.0223937	0.0797612	-0.028997			-0.0393076	-0.0327034	0.00165399	0.0482311
	-0.0727836	-0.0289613	0.0914901	-0.0224451			-0.0574033	-0.0113988	-0.0457361	0.0460446
	-0.0887859	-0.0264043	0.0803461	-0.0204849			-0.0646088	0.0266426	-0.0754484	0.0595969
	-0.106944	-0.0059665	0.0451	-0.0221204			-0.0678483	0.0423296	-0.0539087	0.0772493
	-0.10372	0.0145551	0.00630691	-0.0245246			-0.0659331	0.0157664	-0.000244016	0.0937178
	-0.0757732	0.0194661	-0.014592	-0.03443			-0.0606431	-0.0356288	0.0468106	0.115847
	-0.0488315	0.0139535	-0.0108175	-0.0501152			-0.0711134	-0.0741381	0.062387	0.155997
	-0.0333529	0.00855385	0.00806229	-0.0603059			-0.0985918	-0.0769833	0.0506004	0.19753
	-0.0171834	0.0098167	0.0197393	-0.0614225			-0.109205	-0.0578039	0.054499	0.20693
	0.00160025	0.0175386	0.0174455	-0.0608539			-0.087353	-0.0479843	0.103129	0.177403
	0.0150833	0.0171694	0.0155931	-0.0633409			-0.0509225	-0.0579517	0.162281	0.136257
	0.0162352	-0.00435529	0.0292393	-0.0758177			-0.0092659	-0.0636553	0.173607	0.107542
	-0.00482708	-0.0396079	0.0481157	-0.10198			0.0323529	-0.0437308	0.127703	0.0993399
	-0.0466187	-0.070162	0.0508918	-0.131977			0.0526916	-0.0147235	0.0611043	0.103491
	-0.0789556	-0.0837191	0.0295202	-0.15026			0.0526802	-0.00265736	0.0171248	0.102174
	-0.0743091	-0.0859406	0.00217766	-0.147843			0.05804	-0.0152083	0.0205368	0.0910792
	-0.0465387	-0.088839	-0.00338925	-0.12238			0.0604478	-0.0461265	0.0459207	0.0950081
	-0.0281083	-0.0973669	0.015102	-0.0757738			0.041276	-0.0737991	0.0417419	0.132617
	-0.0275144	-0.103801	0.027574	-0.0336199			0.0218676	-0.0732968	0.00149795	0.184652
	-0.035075	-0.0966405	0.00858247	-0.0160088			0.0189099	-0.0544066	-0.0267684	0.21106
	-0.0411785	-0.0742131	-0.0330219	-0.0229541			0.00648796	-0.0461126	-0.0126124	0.200178
	-0.0411455	-0.0490333	-0.0673558	-0.0434056			-0.0214609	-0.0464014	0.0249562	0.173185
	-0.0421735	-0.0330521	-0.0716433	-0.063117			-0.0384268	-0.0347927	0.0546121	0.153726
	-0.0572741	-0.0231769	-0.054289	-0.0635459			-0.0450649	-0.0175119	0.0572188	0.150756
	-0.0816153	-0.00764682	-0.0455356	-0.0446163			-0.0478225	-0.0040311	0.0351226	0.150847
	-0.0840083	0.00660203	-0.0527485	-0.024741			-0.0313421	0.00773625	0.0140053	0.128519
	-0.0484901	0.00061781	-0.0495951	-0.0128273			-0.00243894	0.0106893	0.00748919	0.0805943
	-0.00643023	-0.0250492	-0.0161086	-0.00897931			0.00506996	-0.00254792	-0.00605502	0.0394929
	0.00485663	-0.053768	0.0354595	-0.0147536			-0.00806743	-0.013047	-0.0447139	0.0232523
	-0.0176423	-0.0745772	0.0733606	-0.0244872			-0.014594	-0.0101263	-0.083901	0.0201809
	-0.0519619	-0.0804706	0.0702511	-0.0334778			-0.0155994	-0.0202558	-0.0912517	0.0240873
	-0.0756483	-0.0675814	0.0305199	-0.0414682			-0.0182987	-0.0491804	-0.0630791	0.0403334
	-0.0818458	-0.0499237	-0.00336744	-0.0466756			-0.0167966	-0.0659192	-0.0237969	0.0653863
	-0.0861505	-0.0414112	0.00265633	-0.0422315			-0.0140934	-0.054874	-0.00900398	0.0996794
	-0.1122	-0.0284719	0.0435053	-0.0342931			-0.0184945	-0.0217892	-0.0326853	0.143542
	-0.146197	-0.00669514	0.0934075	-0.0357299			-0.0173206	0.024858	-0.0665636	0.176017
	-0.144005	-0.00135144	0.13294	-0.0564156			0.00152714	0.0472873	-0.0731146	0.171993
	-0.0973661	-0.0183133	0.146364	-0.0962905			0.0218139	0.00690719	-0.0557391	0.143343
	-0.0477119	-0.0382091	0.133056	-0.134803			0.0276232	-0.0576855	-0.0483378	0.119248
	-0.0292448	-0.0558315	0.108894	-0.14847			0.0236096	-0.0743355	-0.0654082	0.108629
	-0.0391037	-0.0619939	0.0847625	-0.130579			0.0211604	-0.0388787	-0.0799581	0.106813
	-0.0549358	-0.0317993	0.0618522	-0.100679			0.0197585	0.00225913	-0.0568337	0.107234
	-0.0530845	0.0244226	0.0511897	-0.0764282			0.0150089	0.0154061	-0.00101925	0.0889983
	-0.0311767	0.0608596	0.0613895	-0.0630477			0.00427263	-0.00679768	0.0429174	0.0466351
	-0.0214128	0.0601847	0.0768933	-0.0501855			-0.0106679	-0.0437826	0.0333911	0.0158945
	-0.0520832	0.0376472	0.0802975	-0.0196899			-0.0124322	-0.0513881	-0.0304389	0.0261259
	-0.100143	0.00306507	0.0709587	0.0332192			0.0141409	-0.0197141	-0.0971666	0.0558343
	-0.121678	-0.0254903	0.0544142	0.0804609			0.0603396	0.0109986	-0.108856	0.0791694
	-0.100475	-0.0292266	0.0408094	0.0846573			0.0968689	0.0130535	-0.0612126	0.0949161
	-0.0498653	-0.0265229	0.0444484	0.0375383			0.10418	0.00250614	-0.00474948	0.0998132
	-0.00684525	-0.0449311	0.0622667	-0.0369448			0.0872343	0.00288892	0.019474	0.0919814
	-0.00271717	-0.0763819	0.0732516	-0.107528			0.0640745	0.0156605	0.0102587	0.081432
	-0.024933	-0.101475	0.0726338	-0.150612			0.0537317	0.0331969	-0.0172255	0.0640244
	-0.0349494	-0.12036	0.0762832	-0.17079			0.0600074	0.0400313	-0.0498482	0.0268844
	-0.0282984	-0.129307	0.0935557	-0.187564			0.0676826	0.0204762	-0.0824088	-0.00796784
	-0.0367637	-0.116985	0.122533	-0.198363			0.0626497	-0.0119384	-0.125832	-0.00631219
	-0.0682565	-0.091796	0.152262	-0.177785			0.0539573	-0.0274254	-0.183752	0.0279451
	-0.0952307	-0.0642142	0.162529	-0.13003			0.0519979	-0.0221421	-0.223835	0.0630833
	-0.0934192	-0.035652	0.145762	-0.0845521			0.0457936	-0.0165889	-0.212001	0.0800143
	-0.0610844	-0.0187209	0.123688	-0.0667419			0.025044	-0.0177989	-0.163412	0.0743462
	-0.026356	-0.0305482	0.113927	-0.0801187			-0.00218475	-0.0189517	-0.118016	0.058606
	-0.030473	-0.0619219	0.110105	-0.105554			-0.0308409	-0.0147286	-0.098257	0.0564229
	-0.0769781	-0.0902941	0.099517	-0.117958			-0.0583472	-0.00353104	-0.0982725	0.0714272
	-0.116898	-0.103419	0.0843566	-0.116769			-0.0674029	0.00437309	-0.0928053	0.0749605
	-0.107955	-0.100585	0.071646	-0.120339			-0.0584998	-0.00744426	-0.064676	0.0517844
	-0.0600182	-0.0911921	0.0703752	-0.129608			-0.0545228	-0.0402298	-0.0403355	0.0231207
	-0.0111044	-0.0868155	0.0839655	-0.127155			-0.0502441	-0.0685092	-0.0634225	0.0139465
	0.00625857	-0.0844697	0.101984	-0.0976255			-0.0186154	-0.0693941	-0.117952	0.0186042
	-0.013359	-0.0724346	0.11142	-0.0496082			0.0267549	-0.0507727	-0.14627	0.0194348
	-0.035024	-0.0561236	0.111113	-0.00911521			0.0522773	-0.039071	-0.122382	0.00597977
	-0.0222283	-0.0519713	0.107542	-0.00283416			0.0595737	-0.0468384	-0.0714202	-0.0168209
	0.00895389	-0.0627188	0.106268	-0.0241952			0.0579848	-0.0694202	-0.0288445	-0.0302417
	0.0128865	-0.0735313	0.11107	-0.0381558			0.0426322	-0.0954161	-0.0176088	-0.0215955
	-0.019974	-0.0671325	0.119317	-0.0155477			0.0327827	-0.107599	-0.0289135	-0.00414909
	-0.0576506	-0.0452948	0.120528	0.0340788			0.0507862	-0.100844	-0.0230981	0.00107062
	-0.0716338	-0.0292353	0.10746	0.076177			0.069746	-0.0936666	0.00839353	-0.000125394
	-0.0632583	-0.0359146	0.081183	0.0877198			0.0659955	-0.0874982	0.0211267	0.012018
	-0.0543327	-0.063111	0.0535741	0.0719172			0.0652213	-0.061763	-0.0152286	0.0386765
	-0.0673544	-0.0877641	0.0419386	0.0492229			0.0812801	-0.0209152	-0.0781984	0.064478
	-0.100175	-0.0866704	0.0537444	0.034284			0.0879858	0.00473546	-0.129756	0.0817044
	-0.116885	-0.0630338	0.0760787	0.0185491			0.0772536	0.00300487	-0.1498	0.0881875
	-0.0914529	-0.0421959	0.0886156	-0.00113871			0.0618667	-0.0187797	-0.137849	0.0851011
	-0.0470978	-0.0386879	0.0849225	-0.00763913			0.0346193	-0.0534514	-0.118481	0.0855661
	-0.0289729	-0.0403739	0.0731435	0.0147504			0.00414658	-0.0777366	-0.113882	0.0964403
	-0.0481104	-0.0336201	0.0678744	0.0504204			0.00084425	-0.0700044	-0.112739	0.096412
	-0.0764469	-0.0192589	0.0685182	0.0670299			0.0190281	-0.0444649	-0.0956527	0.0661012
	-0.0893788	-0.00397256	0.0630133	0.0396607			0.0255403	-0.0204294	-0.0740542	0.0187033
	-0.0792568	-0.00495874	0.0496222	-0.018295			0.0182577	0.0121198	-0.0705347	-0.0216535
	-0.0579068	-0.0355075	0.04295	-0.0583972			0.0172548	0.0537625	-0.0874329	-0.0370011
	-0.0528924	-0.0757318	0.0481344	-0.0507911			0.021135	0.0739144	-0.115779	-0.010645
	-0.0722302	-0.0912123	0.0548473	-0.0151151			0.0229408	0.0660602	-0.140213	0.0470579
	-0.0862026	-0.0843762	0.0570299	0.00386385			0.021553	0.0557771	-0.142654	0.0965505
	-0.0682877	-0.0780638	0.0560395	-0.0145049			0.0113081	0.046693	-0.127476	0.114709
	-0.036131	-0.0705678	0.0579546	-0.0530607			-0.01095	0.0339676	-0.121509	0.11293
	-0.0226407	-0.0570081	0.073597	-0.0651194			-0.0294839	0.0339029	-0.131969	0.0946974
	-0.0351098	-0.0438023	0.0991453	-0.0259844			-0.0261746	0.045367	-0.132807	0.0560519
	-0.059692	-0.0228882	0.111984	0.0384678			-0.00702895	0.0397787	-0.103362	0.0104585
	-0.0756402	0.00797582	0.104077	0.0833135			0.0123983	0.0202777	-0.0586999	-0.0247814
	-0.0664836	0.0201713	0.0994471	0.0870909			0.0218387	0.00840205	-0.0276734	-0.050192
	-0.0455623	0.00465723	0.116285	0.0636215			0.0201398	0.00295997	-0.0236432	-0.0620658
	-0.0451854	-0.0119852	0.144614	0.0437242			0.0109529	0.00118359	-0.0340859	-0.0554881
	-0.0634741	-0.0221553	0.162173	0.0387833			0.00188885	0.00639738	-0.0368409	-0.0510575
	-0.064773	-0.0374796	0.150139	0.0260409			-0.00609187	0.00235817	-0.0222152	-0.0621108
	-0.0339536	-0.0538819	0.104232	-0.0206532			-0.0238566	-0.0206906	-0.00775166	-0.0671687
	0.0052605	-0.0654576	0.0474554	-0.0814386			-0.0493706	-0.0316074	-0.0153945	-0.0526349
	0.0232381	-0.0764806	0.00930245	-0.114729			-0.0658499	-0.00790426	-0.0382402	-0.0392461
	0.00491654	-0.0742305	-0.0110582	-0.101944			-0.0614037	0.0265534	-0.0484739	-0.0388501
	-0.0373603	-0.0439133	-0.0233004	-0.0594668			-0.0416785	0.0407601	-0.0393254	-0.0433844
	-0.0626178	-0.0110128	-0.0191346	-0.0125231			-0.0180719	0.0260026	-0.0309089	-0.0525816
	-0.0515968	-0.00662146	0.00641079	0.0165812			0.0019177	-0.00885766	-0.0458931	-0.0623213
	-0.0290918	-0.0238074	0.0371894	0.0283048			0.0136376	-0.0471497	-0.0903879	-0.0547304
	-0.0207966	-0.036798	0.0632974	0.0381559			0.019684	-0.0664312	-0.147442	-0.03295
	-0.0263983	-0.0350402	0.0837788	0.0428951			0.0261907	-0.0611036	-0.176129	-0.0199594
	-0.0329228	-0.0209602	0.0967026	0.0203153			0.0286974	-0.0533436	-0.148809	-0.0206487
	-0.0284784	-0.00656633	0.102085	-0.0290312			0.0208069	-0.0582466	-0.0893922	-0.0227673
	-0.0138577	-0.0117119	0.103592	-0.077384			0.0153352	-0.0631115	-0.0475206	-0.0295938
	-0.0128221	-0.0368804	0.0942845	-0.104661			0.0234781	-0.0487891	-0.0433223	-0.045731
	-0.0443025	-0.0622882	0.0664513	-0.103972			0.0331004	-0.0146556	-0.0591487	-0.0672482
	-0.0859047	-0.0785549	0.0302225	-0.0895259			0.0318996	0.0272341	-0.0731127	-0.0872198
	-0.103124	-0.0866239	0.00722861	-0.0869386			0.0214563	0.0547327	-0.075061	-0.0929575
	-0.0959729	-0.0800928	0.0143129	-0.100209			-0.0027572	0.0505472	-0.0811099	-0.065276
	-0.0850171	-0.0558018	0.0480847	-0.101128			-0.0327136	0.0258114	-0.119977	-0.0088405
	-0.0803728	-0.0190301	0.0808908	-0.0734761			-0.0299214	0.00591214	-0.186435	0.0462216
	-0.0836706	0.0227003	0.0826901	-0.0300103			0.0124299	-0.00649088	-0.231469	0.0807507
	-0.0907037	0.0525916	0.0497439	0.00213274			0.0485353	-0.0259152	-0.22767	0.0950855
	-0.0851629	0.0505143	0.0103038	0.00450488			0.0525419	-0.0521689	-0.198784	0.0880394
	-0.0627862	0.0192171	-0.00606359	-0.0155372			0.0359164	-0.0703373	-0.175062	0.0569975
	-0.0500092	-0.0143785	0.00402561	-0.0308731			7.74614e-05	-0.0771051	-0.161652	0.0175771
	-0.0618479	-0.0295854	0.0189947	-0.0278386			-0.0458957	-0.075594	-0.14577	-0.00952578
	-0.0744984	-0.0303133	0.021224	-0.0196184			-0.0691613	-0.0660769	-0.113052	-0.0191109
	-0.0619588	-0.0332613	0.0144728	-0.0205565			-0.0699989	-0.0538129	-0.0757987	-0.0162203
	-0.0256516	-0.0464884	0.0134005	-0.0239194			-0.0778971	-0.0454266	-0.072662	-0.00261546
	0.00906995	-0.056846	0.0262768	-0.0167648			-0.080016	-0.0310458	-0.120399	0.0193535
	0.0102986	-0.0484791	0.0495263	0.00787935			-0.0470969	-0.00624028	-0.178511	0.0474207
	-0.0278666	-0.0245375	0.0752436	0.0366502			-0.0063917	0.0124668	-0.195678	0.0850485
	-0.0687738	-0.00642475	0.089511	0.0447869			0.00798143	0.0257293	-0.165946	0.128434
	-0.0725385	-0.0190839	0.0838093	0.0126372			0.0016083	0.0467489	-0.120833	0.155876
	-0.0452458	-0.0640646	0.0582092	-0.0411061			-0.0233396	0.0609564	-0.0939195	0.150006
	-0.0272062	-0.111049	0.0241829	-0.075026			-0.0659128	0.0491109	-0.0967746	0.121899
	-0.0338748	-0.131338	0.00352877	-0.0711678			-0.0935428	0.0262205	-0.111346	0.0999691
	-0.0428362	-0.124443	0.0151594	-0.0454082			-0.0864202	0.0106916	-0.106509	0.109448
	-0.0318252	-0.107784	0.0497062	-0.0319193			-0.080362	0.0022842	-0.0855984	0.161102
	-0.00569907	-0.0995093	0.0790803	-0.0520529			-0.0951472	0.00848081	-0.0830935	0.228662
	0.013399	-0.106352	0.092677	-0.0935399			-0.104526	0.0318219	-0.11124	0.260376
	0.00774724	-0.109626	0.0926452	-0.119616			-0.0961924	0.0425469	-0.145957	0.233809
	-0.0252024	-0.0807293	0.0759228	-0.11858			-0.0835961	0.0293226	-0.159681	0.1802
	-0.0597722	-0.0297008	0.0456456	-0.108763			-0.0757019	0.0223719	-0.144954	0.131826
	-0.0678858	0.00268515	0.0104775	-0.10433			-0.0742818	0.0395811	-0.120437	0.0981126
	-0.0580796	0.00336794	-0.0251512	-0.10059			-0.0765018	0.0598041	-0.121828	0.0853065
	-0.0556319	-0.00889037	-0.0510233	-0.0807115			-0.0598337	0.0708353	-0.159381	0.0884439
	-0.0618699	-0.0219595	-0.0518729	-0.0390703			-0.0157131	0.074066	-0.19315	0.0883907
	-0.0607503	-0.0275944	-0.0372005	-0.000643612			0.021532	0.0614448	-0.18496	0.0894113
	-0.0503366	-0.0166494	-0.0281711	0.00610055			0.0134685	0.0433859	-0.146533	0.112675
	-0.0389779	-0.00271941	-0.0263564	-0.0124465			-0.0327015	0.0493099	-0.117866	0.150383
	-0.0351946	-0.00114111	-0.0213744	-0.0245867			-0.0747365	0.0730508	-0.114268	0.182216
	-0.049262	0.00775504	-0.010672	-0.0163147			-0.0834748	0.0827915	-0.120302	0.207548
	-0.0774048	0.037024	0.00873723	0.00837211			-0.0639434	0.0808356	-0.115636	0.222496
	-0.0923881	0.0556258	0.0393229	0.030552			-0.0506799	0.0847045	-0.0967895	0.212497
	-0.080357	0.0454431	0.0702765	0.0404263			-0.0700047	0.0937679	-0.0779211	0.189837
	-0.062274	0.0310399	0.095327	0.0510906			-0.112818	0.111032	-0.0789039	0.182027
	-0.0569102	0.0335725	0.117734	0.0840832			-0.146037	0.136324	-0.0942175	0.191976
	-0.064222	0.0588098	0.133393	0.137588			-0.146902	0.146243	-0.0915997	0.211216
	-0.0792996	0.100371	0.130015	0.191893			-0.127412	0.124226	-0.0520256	0.240209
	-0.0941145	0.127372	0.11286	0.229907			-0.111451	0.091076	0.00132749	0.26132
	-0.0999126	0.109489	0.0937147	0.240726			-0.107695	0.0719022	0.0348391	0.249463
	-0.105654	0.0649964	0.0736171	0.225741			-0.105399	0.0666305	0.0367094	0.217752
	-0.123647	0.0359319	0.0557822	0.206734			-0.0921563	0.0684764	0.0184041	0.201236
	-0.136851	0.0278978	0.0532719	0.203247			-0.0709945	0.074152	0.00520576	0.202846
	-0.123217	0.021388	0.0680309	0.20258			-0.0612699	0.0808133	0.0123836	0.204871
	-0.0857345	0.00419742	0.092149	0.186458			-0.07676	0.0826455	0.0240592	0.191525
	-0.0404421	-0.0280031	0.118395	0.161238			-0.0989845	0.0800134	0.00711218	0.152115
	-0.00963729	-0.06586	0.13326	0.141827			-0.0919957	0.0710435	-0.0348145	0.10217
	-0.0113693	-0.0837641	0.12229	0.129276			-0.0513883	0.050498	-0.0682332	0.0897443
	-0.0348136	-0.0677688	0.0924081	0.118956			-0.0104843	0.0335153	-0.0731385	0.130085
	-0.04986	-0.0361799	0.0667576	0.0988776			0.00461041	0.0467241	-0.0543418	0.17447
	-0.0508031	-0.0111101	0.0668835	0.0588727			-0.00891757	0.0873311	-0.0253575	0.174662
	-0.0581068	0.00275586	0.104079	0.0149336			-0.039029	0.12087	-0.00940627	0.134576
	-0.0787456	0.00767611	0.167645	-0.0064614			-0.0590762	0.119608	-0.0201504	0.0906188
	-0.102953	0.00934081	0.225029	-0.00764672			-0.055991	0.0863851	-0.0312896	0.0717461
	-0.122788	0.0142983	0.249733	-0.00480017			-0.0599714	0.0467572	-0.0188749	0.0807144
	-0.127978	0.016856	0.235695	-0.00769392			-0.094253	0.0355423	-0.00915082	0.0900228
	-0.114038	0.00838761	0.192752	-0.0193223			-0.126681	0.062837	-0.0321153	0.0697328
	-0.0979655	-0.00507851	0.14292	-0.0303627			-0.128136	0.0992165	-0.0789912	0.029051
	-0.095469	-0.0194589	0.109631	-0.0219245			-0.110406	0.107555	-0.119004	0.0047763
	-0.0959084	-0.0358153	0.104092	-0.00346597			-0.0816945	0.0877458	-0.134544	0.013107
	-0.0859435	-0.0493533	0.118584	0.000484563			-0.0466224	0.0668404	-0.128	0.0335095
	-0.0741706	-0.0548603	0.138658	-0.0170771			-0.0313477	0.0570048	-0.121421	0.0418344
	-0.0676073	-0.0561812	0.150005	-0.0372429			-0.0362239	0.0563954	-0.12474	0.0334861
	-0.0638388	-0.0586435	0.150001	-0.0443353			-0.0275697	0.0598371	-0.112765	0.0163974
	-0.0675884	-0.0632019	0.142919	-0.0344086			-0.0142276	0.0546202	-0.0763503	0.000972474
	-0.0801604	-0.0701832	0.132924	-0.0218678			-0.0341451	0.0382706	-0.0511958	-0.0170027
	-0.0870237	-0.0801696	0.122948	-0.0300655			-0.0742832	0.0384851	-0.070831	-0.0592043
	-0.0847811	-0.0928616	0.12311	-0.0581232			-0.091566	0.0684488	-0.122706	-0.125733
	-0.0868657	-0.104148	0.140789	-0.0819601			-0.0857361	0.0968978	-0.17651	-0.16922
	-0.0986501	-0.108784	0.162818	-0.0835054			-0.0714587	0.100214	-0.209519	-0.152104
	-0.110802	-0.110607	0.167201	-0.0752552			-0.0517133	0.0829005	-0.209323	-0.0989172
	-0.116745	-0.112708	0.140109	-0.0820168			-0.0515079	0.0500719	-0.184926	-0.0684815
	-0.120399	-0.109456	0.0824278	-0.116235			-0.0836709	0.0232496	-0.164265	-0.0909952
	-0.116928	-0.103824	0.0184385	-0.166508			-0.109628	0.0308999	-0.156627	-0.153143
	-0.0988323	-0.0994662	-0.0139533	-0.203165			-0.0971011	0.060142	-0.144606	-0.212761
	-0.0741213	-0.081772	0.00107956	-0.208225			-0.0738237	0.0713709	-0.123844	-0.229846
	-0.0575302	-0.0457197	0.0434536	-0.193711			-0.0651045	0.0662173	-0.115304	-0.208568
	-0.0547263	-0.0152766	0.0937282	-0.181239			-0.0607119	0.0651421	-0.133325	-0.190458
	-0.0672619	-0.0061184	0.139911	-0.177202			-0.0545885	0.0587942	-0.173875	-0.195076
	-0.0980563	-0.003449	0.173201	-0.174697			-0.0465134	0.0396459	-0.215934	-0.202788
	-0.134651	0.00058443	0.1919	-0.168553			-0.0338394	0.0259203	-0.231179	-0.198099
	-0.157962	-0.00466404	0.190246	-0.155971			-0.0330503	0.0237165	-0.206336	-0.182204
	-0.165998	-0.0210648	0.15722	-0.148158			-0.0689938	0.0223206	-0.165949	-0.157945
	-0.159891	-0.0467106	0.105903	-0.15457			-0.122339	0.0281919	-0.143278	-0.141549
	-0.13517	-0.0867218	0.071118	-0.178993			-0.147641	0.0447423	-0.143704	-0.153091
	-0.102783	-0.123181	0.0559996	-0.213957			-0.127449	0.0521107	-0.151314	-0.175207
	-0.0868122	-0.126105	0.0392675	-0.243101			-0.0811325	0.0493702	-0.159301	-0.178867
	-0.0918419	-0.105984	0.0165479	-0.247			-0.0420056	0.0510542	-0.178003	-0.176079
	-0.10397	-0.0940879	0.00406973	-0.22674			-0.0288367	0.0382551	-0.219226	-0.189368
	-0.11725	-0.0891401	0.0149609	-0.199595			-0.0351204	-0.0133944	-0.275222	-0.206578
	-0.131696	-0.0798012	0.0551126	-0.169849			-0.0340239	-0.0806566	-0.319982	-0.212606
	-0.137553	-0.0779354	0.105681	-0.137335			-0.017879	-0.128154	-0.325366	-0.207038
	-0.128539	-0.0851944	0.126481	-0.113723			-0.00947881	-0.144814	-0.287667	-0.190848
	-0.112524	-0.0921841	0.102283	-0.108256			-0.0274232	-0.123324	-0.234769	-0.178358
	-0.0949274	-0.111553	0.0609661	-0.121098			-0.0580096	-0.0749791	-0.195064	-0.199251
	-0.0824843	-0.145261	0.0299468	-0.151999			-0.0649805	-0.0370586	-0.172645	-0.24212
	-0.0875494	-0.163721	0.0135568	-0.189705			-0.0339951	-0.0331548	-0.160366	-0.258837
	-0.107997	-0.153776	0.00597228	-0.210775			0.0126455	-0.0492189	-0.156776	-0.235661
	-0.12908	-0.132076	0.000429711	-0.208195			0.0363162	-0.0631299	-0.153508	-0.204955
	-0.145555	-0.111053	-0.00695346	-0.197803			0.014577	-0.0663205	-0.14913	-0.19538
	-0.157678	-0.0960764	0.000665968	-0.189985			-0.0336714	-0.0592272	-0.160614	-0.214297
	-0.154469	-0.0971167	0.0384796	-0.17975			-0.0706348	-0.0526856	-0.198692	-0.251533
	-0.133291	-0.104668	0.0831666	-0.161487			-0.0831345	-0.0608711	-0.24669	-0.276412
	-0.11032	-0.0968142	0.0910462	-0.137674			-0.0896353	-0.0809291	-0.283434	-0.26728
	-0.0996649	-0.0772236	0.0469488	-0.118247			-0.10164	-0.0909104	-0.301129	-0.243355
	-0.113218	-0.0644134	-0.0230315	-0.122975			-0.11024	-0.0767788	-0.297067	-0.231676
	-0.152941	-0.0625183	-0.0682714	-0.151124			-0.109279	-0.0576056	-0.273041	-0.224928
	-0.186448	-0.0668744	-0.0495268	-0.17171			-0.0997712	-0.0573483	-0.243054	-0.204785
	-0.177657	-0.0772118	0.0188477	-0.158659			-0.0821539	-0.0774329	-0.214616	-0.178595
	-0.140397	-0.0914467	0.0842542	-0.131454			-0.07307	-0.10282	-0.185385	-0.164829
	-0.114038	-0.108609	0.113547	-0.120907			-0.08921	-0.116024	-0.162543	-0.171362
	-0.105244	-0.131504	0.117078	-0.140311			-0.107257	-0.107224	-0.164621	-0.192989
	-0.0985713	-0.15564	0.11316	-0.176314			-0.0980639	-0.0919828	-0.186814	-0.216558
	-0.0924623	-0.169615	0.105357	-0.20148			-0.0762788	-0.0979026	-0.214477	-0.23188
	-0.0897744	-0.172611	0.0832577	-0.198979			-0.064854	-0.124223	-0.244823	-0.250202
	-0.0911542	-0.16961	0.0403406	-0.188882			-0.0552492	-0.144134	-0.270587	-0.290071
	-0.103757	-0.159688	-0.0103691	-0.194817			-0.0461463	-0.145178	-0.282555	-0.340923
	-0.126302	-0.144766	-0.0468805	-0.207479			-0.0437594	-0.137356	-0.287017	-0.370247
	-0.139798	-0.132561	-0.0643352	-0.208512			-0.0302452	-0.126363	-0.288268	-0.360634
	-0.135998	-0.128866	-0.075413	-0.19361			-0.00384013	-0.108139	-0.271614	-0.325579
	-0.128932	-0.137877	-0.087352	-0.174435			-0.00700235	-0.0826411	-0.244668	-0.285811
	-0.126002	-0.158521	-0.0935856	-0.163941			-0.0494099	-0.0524826	-0.239433	-0.253829
	-0.119727	-0.181934	-0.079294	-0.16039			-0.0868869	-0.0294764	-0.266684	-0.232288
	-0.110639	-0.199654	-0.0367281	-0.142047			-0.100891	-0.0439664	-0.308664	-0.212194
	-0.106278	-0.208717	0.017979	-0.0962265			-0.10644	-0.0993164	-0.343325	-0.184716
	-0.106393	-0.211652	0.054857	-0.0414494			-0.106924	-0.149894	-0.34831	-0.166636
	-0.114568	-0.212069	0.0539071	-0.00982564			-0.104118	-0.159547	-0.319597	-0.181777
	-0.135439	-0.207746	0.0255735	-0.0223045			-0.113202	-0.144663	-0.288923	-0.219853
	-0.152471	-0.196735	-0.0016886	-0.0721049			-0.113979	-0.124602	-0.290734	-0.248848
	-0.137332	-0.188683	-0.00351093	-0.128302			-0.072998	-0.106247	-0.315633	-0.253994
	-0.088076	-0.19074	0.0137063	-0.165022			-0.0180615	-0.103044	-0.331635	-0.240208
	-0.0385448	-0.190572	0.0230303	-0.17981			0.00177802	-0.104671	-0.325364	-0.224493
	-0.0189358	-0.182667	0.0184361	-0.191672			-0.0115137	-0.0872314	-0.309664	-0.233797
	-0.0324944	-0.174041	0.0222698	-0.207102			-0.0253919	-0.0710931	-0.301621	-0.270705
	-0.0670149	-0.159616	0.0482612	-0.212256			-0.0249185	-0.0872297	-0.313348	-0.297482
	-0.0964554	-0.137736	0.0806293	-0.185839			-0.00556846	-0.109124	-0.334856	-0.285879
	-0.0980392	-0.127269	0.097836	-0.134815			0.0234623	-0.0977104	-0.335687	-0.247234
	-0.0814342	-0.138667	0.0899337	-0.0913609			0.031492	-0.064067	-0.307402	-0.201082
	-0.0756237	-0.161333	0.0707563	-0.0810398			0.0122867	-0.0302215	-0.27834	-0.162347
	-0.0817124	-0.188993	0.0673444	-0.0985601			-0.00621149	-0.00655038	-0.269804	-0.147436
	-0.0783274	-0.214579	0.0831083	-0.118478			-0.00959176	-0.0133547	-0.2713	-0.150374
	-0.0647743	-0.215559	0.0875001	-0.124746			-0.0167981	-0.0502443	-0.263821	-0.141216
	-0.0569804	-0.190029	0.0642781	-0.117402			-0.0377692	-0.0775661	-0.242322	-0.123106
	-0.0625809	-0.1705	0.0282955	-0.104206			-0.0596634	-0.0785661	-0.221648	-0.130804
	-0.0816177	-0.168711	-0.00511294	-0.0887179			-0.0660549	-0.082942	-0.229686	-0.169017
	-0.103286	-0.165122	-0.029093	-0.0628392			-0.0512339	-0.102596	-0.272573	-0.21104
	-0.104181	-0.155046	-0.0390619	-0.0220762			-0.0321028	-0.118772	-0.315776	-0.24293
	-0.0806085	-0.145204	-0.0412712	0.0165432			-0.0345513	-0.120787	-0.323513	-0.260082
	-0.0601523	-0.130717	-0.042775	0.0238747			-0.0692201	-0.106881	-0.298251	-0.265295
	-0.0611678	-0.122788	-0.0364267	-0.00460992			-0.112848	-0.0771431	-0.272746	-0.284196
	-0.0702111	-0.142524	-0.015642	-0.0517724			-0.13306	-0.0608982	-0.263151	-0.323427
	-0.0695063	-0.171459	0.00398801	-0.0973901			-0.123314	-0.0881059	-0.262295	-0.34121
	-0.0584149	-0.175211	0.00777712	-0.126836			-0.0998119	-0.135067	-0.261434	-0.310198
	-0.0426121	-0.164413	-0.00273016	-0.148178			-0.0799095	-0.159071	-0.261576	-0.261824
	-0.0352836	-0.160808	-0.0175825	-0.18181			-0.0642258	-0.152843	-0.26643	-0.235005
	-0.0472561	-0.161035	-0.026659	-0.226816			-0.0424313	-0.133496	-0.280901	-0.23502
	-0.0614118	-0.159412	-0.0211636	-0.253559			-0.00566681	-0.118687	-0.300551	-0.249723
	-0.05504	-0.151049	-0.0117026	-0.248944			0.0361597	-0.115746	-0.307681	-0.260159
	-0.0348551	-0.125731	-0.0264625	-0.226214			0.0504244	-0.113809	-0.292366	-0.253724
	-0.0234111	-0.0936716	-0.0717549	-0.203378			0.0206071	-0.0882725	-0.272874	-0.242661
	-0.0261376	-0.0841981	-0.123101	-0.18096			-0.0286682	-0.0388176	-0.262824	-0.243472
	-0.0359477	-0.0982978	-0.154235	-0.150074			-0.0628668	0.00287474	-0.257045	-0.243965
	-0.0407342	-0.10868	-0.156545	-0.101507			-0.0710747	0.0103895	-0.242543	-0.226746
	-0.0263431	-0.102859	-0.141488	-0.0440034			-0.0595004	-0.00561519	-0.21333	-0.204139
	-0.0037337	-0.0916806	-0.140345	-0.00211679			-0.0463517	-0.0147121	-0.170374	-0.192237
	-0.00197524	-0.0888521	-0.166104	0.00541653			-0.0506126	-0.00890598	-0.134148	-0.182637
	-0.0201779	-0.102487	-0.19013	-0.0135314			-0.0621398	-0.00586417	-0.136772	-0.167308
	-0.0331184	-0.129815	-0.182971	-0.0391204			-0.0485684	-0.0233067	-0.182431	-0.156532
	-0.0307287	-0.156525	-0.150428	-0.0574849			-0.01718	-0.057986	-0.241941	-0.155753
	-0.0195125	-0.17207	-0.114396	-0.0657998			-0.00491834	-0.0800152	-0.282705	-0.165516
	-0.0072809	-0.180335	-0.0867758	-0.0727052			-0.0126702	-0.0605531	-0.294614	-0.186623
	-0.0062804	-0.185487	-0.0616398	-0.0890882			-0.0224256	-0.0209764	-0.28217	-0.211501
	-0.0233273	-0.187723	-0.0309799	-0.110135			-0.0403374	-0.0174395	-0.266218	-0.223177
	-0.0424539	-0.19164	-0.00339975	-0.118101			-0.0643258	-0.0659625	-0.267573	-0.217971
	-0.0482203	-0.201623	0.00208008	-0.107523			-0.0719092	-0.122423	-0.275051	-0.209699
	-0.0552834	-0.211764	-0.0123201	-0.0901503			-0.0701317	-0.137081	-0.26794	-0.206903
	-0.0817603	-0.217838	-0.0279292	-0.0818328			-0.0737196	-0.0960796	-0.260351	-0.208829
	-0.114321	-0.220679	-0.033735	-0.0903295			-0.061137	-0.0308482	-0.273597	-0.213794
	-0.127706	-0.214929	-0.0387482	-0.103997			-0.0272718	0.00218319	-0.300257	-0.221055
	-0.112492	-0.192674	-0.0560232	-0.106324			-0.0132287	-0.0309241	-0.322375	-0.224139
	-0.076229	-0.157278	-0.0872387	-0.0992796			-0.0293706	-0.0927983	-0.331689	-0.221076
	-0.039907	-0.12904	-0.113727	-0.0948885			-0.0485134	-0.117619	-0.318439	-0.223899
	-0.0282552	-0.128001	-0.111602	-0.0983375			-0.0720295	-0.0986365	-0.289331	-0.238449
	-0.0415951	-0.146364	-0.072839	-0.101642			-0.0988885	-0.0797671	-0.261839	-0.257923
	-0.0524207	-0.156016	-0.0139702	-0.101213			-0.0968508	-0.0852108	-0.237983	-0.275925
	-0.0453154	-0.138733	0.0291573	-0.0936732			-0.0663979	-0.103126	-0.207634	-0.280599
	-0.0334427	-0.102483	0.0281272	-0.0815762			-0.0520398	-0.10543	-0.177024	-0.254635
	-0.0265629	-0.0768725	-0.013	-0.0659759			-0.0622668	-0.0659471	-0.165506	-0.207473
	-0.0183263	-0.0849562	-0.0573295	-0.0486874			-0.0706667	-0.00784015	-0.186137	-0.170604
	-0.000822033	-0.109966	-0.073489	-0.0343718			-0.0820602	0.00152848	-0.237102	-0.152074
	0.022233	-0.11575	-0.0669084	-0.0318216			-0.10506	-0.0423508	-0.296813	-0.140051
	0.0443603	-0.107798	-0.0671782	-0.043454			-0.123184	-0.0721497	-0.328273	-0.135756
	0.0573069	-0.123225	-0.0905244	-0.0600075			-0.130062	-0.0549874	-0.309211	-0.145332
	0.0477905	-0.166269	-0.120845	-0.0665627			-0.132968	-0.0155293	-0.259565	-0.160998
	0.0244954	-0.205273	-0.122004	-0.0494618			-0.118209	0.0158807	-0.219143	-0.178947
	0.0198857	-0.208311	-0.0751299	-0.00208658			-0.075293	0.019556	-0.197899	-0.198648
	0.0471223	-0.159705	-0.00198965	0.0712215			-0.0319928	-0.00454063	-0.181633	-0.208009
	0.0822905	-0.0789217	0.0611413	0.152798			-0.0191771	-0.0167781	-0.167339	-0.205069
	0.100262	-0.0156283	0.105499	0.217839			-0.0398556	0.00720339	-0.165806	-0.209747
	0.0987617	0.00972708	0.137026	0.257805			-0.0754395	0.0284064	-0.189335	-0.219583
	0.0874692	0.0236925	0.160237	0.281737			-0.0998547	0.00308673	-0.241241	-0.204641
	0.0852398	0.0363595	0.181552	0.312483			-0.0939834	-0.050355	-0.301495	-0.161768
	0.105063	0.0295985	0.206584	0.364055			-0.0698526	-0.0870969	-0.329694	-0.120877
	0.129253	0.0121322	0.230506	0.428871			-0.0551251	-0.0885001	-0.309316	-0.0998801
	0.131571	0.0157909	0.258418	0.495029			-0.0516554	-0.0599394	-0.260694	-0.101536
	0.121524	0.0456547	0.30299	0.558341			-0.0431087	-0.0291781	-0.212998	-0.129547
	0.126653	0.0953102	0.361479	0.619095			-0.0209512	-0.033228	-0.179376	-0.166174
	0.151649	0.16128	0.422284	0.673784			-0.000510034	-0.0642178	-0.161653	-0.187988
	0.186589	0.215088	0.483219	0.727364			-0.000842489	-0.0770873	-0.159085	-0.206531
	0.221375	0.223981	0.540172	0.778992			-0.0208573	-0.061596	-0.171056	-0.240555
	0.246745	0.203935	0.58083	0.829242			-0.0435939	-0.0522529	-0.200574	-0.279706
	0.263439	0.19637	0.603132	0.889996			-0.0528567	-0.065606	-0.25622	-0.308734
	0.285886	0.213985	0.613402	0.964916			-0.0484879	-0.0902647	-0.319847	-0.32265
	0.309714	0.251513	0.614624	1.03043			-0.0378555	-0.110811	-0.352709	-0.304915
	0.311571	0.297586	0.6163	1.07121			-0.0263804	-0.114183	-0.338792	-0.247656
	0.291004	0.328429	0.640474	1.09874			-0.0116477	-0.104647	-0.295719	-0.186086
	0.270046	0.337206	0.692201	1.13122			0.00574588	-0.107362	-0.243963	-0.156529
	0.266022	0.344478	0.749802	1.18051			0.0121324	-0.136364	-0.206023	-0.148002
	0.28592	0.362539	0.791273	1.24668			-0.00110463	-0.165454	-0.201153	-0.132717
	0.317405	0.383781	0.814813	1.30949			-0.020697	-0.156962	-0.213716	-0.110011
	0.328235	0.404238	0.832746	1.34852			-0.0347758	-0.109816	-0.217018	-0.0943744
	0.30488	0.427844	0.860107	1.36746			-0.0405376	-0.0625786	-0.215084	-0.0988573
	0.274672	0.454016	0.89589	1.3849			-0.02772	-0.0495773	-0.223495	-0.127554
	0.261291	0.481106	0.921572	1.41006			0.00079951	-0.0686059	-0.233517	-0.160772
	0.260032	0.503691	0.927356	1.44479			0.0157139	-0.0898461	-0.229037	-0.166278
	0.266486	0.511241	0.93214	1.48669			0.00479945	-0.0816761	-0.211616	-0.142504
	0.28441	0.503368	0.955524	1.5314			-0.00942226	-0.0445792	-0.19614	-0.1203
	0.314648	0.500214	0.998477	1.58238			-0.0190913	-0.016623	-0.198515	-0.117843
	0.360992	0.519499	1.04282	1.65188			-0.0329544	-0.0209562	-0.225437	-0.13353
	0.420275	0.554688	1.06989	1.7307			-0.0371811	-0.0361965	-0.255995	-0.15613
	0.460989	0.585768	1.07513	1.78579			-0.0253902	-0.0337255	-0.257276	-0.163297
	0.453554	0.602115	1.07554	1.79679			-0.0209192	-0.0165459	-0.228712	-0.139757
	0.413635	0.614056	1.09277	1.77337			-0.021332	0.00148673	-0.210042	-0.107611
	0.382049	0.638469	1.13413	1.74595			-0.00294415	0.00734783	-0.218757	-0.106099
	0.375208	0.675394	1.18691	1.74612			0.0151115	-0.00543456	-0.243434	-0.137368
	0.38694	0.697969	1.22305	1.7867			0.00616669	-0.0183744	-0.271884	-0.165523
	0.407167	0.679618	1.22635	1.83734			-0.0102437	-0.00865486	-0.295927	-0.163469
	0.422039	0.631739	1.207	1.86585			-0.0193293	0.00526146	-0.304368	-0.141527
	0.426725	0.595308	1.19079	1.86806			-0.038457	-0.0163309	-0.303321	-0.128965
	0.438519	0.599634	1.19941	1.86404			-0.0582526	-0.0698775	-0.301187	-0.142292
	0.46621	0.636413	1.24178	1.87631			-0.0524223	-0.113149	-0.28796	-0.167829
	0.491426	0.677328	1.30319	1.91233			-0.0402664	-0.120378	-0.264455	-0.17419
	0.494513	0.708185	1.35432	1.9531			-0.0395645	-0.0884783	-0.251897	-0.150052
	0.478572	0.731718	1.38317	1.97622			-0.0314115	-0.0405108	-0.259716	-0.121143
	0.461489	0.7579	1.39609	1.98982			-0.0153402	-0.0253303	-0.278757	-0.113491
	0.45741	0.796094	1.39879	2.01743			-0.0220387	-0.0524089	-0.293494	-0.118135
	0.473791	0.833839	1.39294	2.06192			-0.0579368	-0.066273	-0.285495	-0.116981
	0.503126	0.84305	1.3811	2.10862			-0.0994253	-0.0365125	-0.24665	-0.1061
	0.5251	0.821303	1.36726	2.14421			-0.12968	-0.0108231	-0.200667	-0.0856873
	0.529761	0.79437	1.36177	2.17266			-0.128637	-0.0336128	-0.181301	-0.0675133
	0.533935	0.777697	1.38615	2.20866			-0.0858936	-0.0986652	-0.191337	-0.0719594
	0.558395	0.775881	1.43743	2.26161			-0.0320408	-0.174206	-0.206639	-0.0948918
	0.59038	0.795695	1.48902	2.31676			-0.00430104	-0.212825	-0.213382	-0.108753
	0.608895	0.820872	1.52633	2.34989			0.0016897	-0.181843	-0.221986	-0.110699
	0.617244	0.827481	1.55229	2.35378			0.00728119	-0.114742	-0.235594	-0.118528
	0.624144	0.827556	1.55956	2.34786			0.0107917	-0.0690529	-0.248083	-0.130923
	0.63021	0.843575	1.54396	2.36392			0.00388018	-0.0455122	-0.253323	-0.134903
	0.636412	0.861716	1.52214	2.40828			-0.0169473	-0.0122132	-0.247807	-0.126272
	0.638139	0.863754	1.512	2.4549			-0.0474749	0.0303776	-0.236297	-0.101076
	0.626492	0.861291	1.52189	2.47032			-0.0696931	0.0616327	-0.236951	-0.0667346
	0.614239	0.865782	1.55581	2.45989			-0.0618473	0.069062	-0.251998	-0.0587414
	0.62228	0.874046	1.5998	2.45578			-0.0280625	0.0495371	-0.25449	-0.0946004
	0.646148	0.884706	1.62359	2.47523			0.000619504	0.0101084	-0.219537	-0.13727
	0.661782	0.88795	1.61804	2.50586			0.00282677	-0.020673	-0.163077	-0.144086
	0.660632	0.866135	1.60143	2.52261			-0.0227667	-0.0347867	-0.124535	-0.117905
	0.650399	0.835878	1.59289	2.51268			-0.0591926	-0.0635669	-0.133361	-0.0858923
	0.64252	0.837007	1.60919	2.49602			-0.0870661	-0.121732	-0.182414	-0.0688373
	0.652399	0.864143	1.6575	2.50782			-0.0967265	-0.172946	-0.235684	-0.0822333
	0.682481	0.881891	1.71099	2.55356			-0.0887723	-0.168553	-0.25417	-0.114295
	0.70996	0.881321	1.73029	2.60314			-0.0710698	-0.103445	-0.235892	-0.132664
	0.712339	0.875055	1.7136	2.63733			-0.0485583	-0.0200759	-0.217438	-0.132363
	0.695516	0.872588	1.69456	2.65397			-0.0241291	0.023327	-0.218156	-0.142858
	0.677291	0.8852	1.69798	2.66113			-0.00665836	0.0106199	-0.215571	-0.171343
	0.666168	0.908498	1.72855	2.67259			-0.00221906	-0.0106512	-0.189338	-0.192788
	0.666812	0.906838	1.77497	2.68688			-0.00551563	0.00845634	-0.147161	-0.192887
	0.671983	0.869115	1.81955	2.67422			-0.0103292	0.0515343	-0.114281	-0.17178
	0.667002	0.833186	1.84967	2.62676			-0.0183251	0.0587535	-0.124149	-0.134965
	0.663598	0.834431	1.8712	2.58152			-0.0264777	0.00513439	-0.188819	-0.101225
	0.684539	0.868156	1.88922	2.58159			-0.0264173	-0.069811	-0.261884	-0.0862533
	0.720716	0.904454	1.90298	2.63104			-0.025961	-0.110615	-0.283371	-0.0765772
	0.743326	0.911666	1.90976	2.70033			-0.0335529	-0.0991882	-0.256702	-0.0620683
	0.737559	0.887216	1.90917	2.74877			-0.0348374	-0.0634316	-0.228596	-0.0584029
	0.703351	0.865628	1.90155	2.75004			-0.0228811	-0.046158	-0.230733	-0.0765686
	0.659958	0.874328	1.89892	2.71858			-0.014232	-0.0650583	-0.257781	-0.104326
	0.645772	0.897869	1.91175	2.69141			-0.0117591	-0.0855863	-0.287415	-0.127524
	0.676839	0.904967	1.92752	2.68981			-0.00318618	-0.0659421	-0.294578	-0.141132
	0.722057	0.890258	1.92363	2.70454			0.000955349	-0.0159802	-0.287814	-0.142557
	0.749644	0.877051	1.89563	2.72781			-0.00932387	0.0213524	-0.292504	-0.137873
	0.760615	0.890077	1.86537	2.75882			-0.00973785	0.0216091	-0.30562	-0.140109
	0.768702	0.929178	1.86358	2.80242			0.00911157	-0.00923559	-0.293221	-0.150369
	0.780761	0.965723	1.90167	2.85421			0.0212294	-0.0429741	-0.249046	-0.153942
	0.798424	0.974177	1.95454	2.89179			0.0222907	-0.0487904	-0.211424	-0.143291
	0.811486	0.962131	1.98345	2.89176			0.0256019	-0.0317644	-0.213568	-0.133385
	0.803512	0.960153	1.97345	2.86332			0.00931134	-0.0303258	-0.256089	-0.141611
	0.781731	0.983553	1.94061	2.84152			-0.0357283	-0.0487439	-0.310152	-0.165672
	0.775279	1.01389	1.91913	2.84491			-0.0726468	-0.0514449	-0.326752	-0.185716
	0.789271	1.02274	1.93502	2.8617			-0.0811807	-0.0246115	-0.290105	-0.172787
	0.801789	1.00246	1.98636	2.86723			-0.0753204	0.00995395	-0.246726	-0.115055
	0.805448	0.970927	2.05309	2.84451			-0.0525628	0.0307132	-0.242491	-0.046066
	0.805323	0.949705	2.11759	2.81324			-0.00574181	0.0286084	-0.258359	-0.0147842
	0.800479	0.942622	2.16717	2.80954			0.034146	0.00378423	-0.251836	-0.027238
	0.793281	0.935867	2.18583	2.84484			0.0453541	-0.0137387	-0.211874	-0.0518766
	0.790236	0.913989	2.17272	2.89166			0.0393545	0.00186065	-0.156066	-0.0693938
	0.78798	0.885009	2.14252	2.91926			0.013958	0.0211167	-0.119896	-0.0829063
	0.776917	0.880143	2.11858	2.92173			-0.0349705	0.00653279	-0.124771	-0.0973525
	0.767478	0.905	2.11893	2.91746			-0.0791555	-0.0287087	-0.152264	-0.118777
	0.777001	0.928187	2.14527	2.92715			-0.0909987	-0.0610404	-0.164461	-0.139912
	0.801379	0.932681	2.17539	2.94589			-0.0809005	-0.0849955	-0.154581	-0.133907
	0.822289	0.934469	2.18768	2.95926			-0.0608539	-0.0883931	-0.142715	-0.0966084
	0.831313	0.946619	2.19028	2.96334			-0.029629	-0.073072	-0.141451	-0.062563
	0.832003	0.970526	2.20397	2.96761			-0.000392789	-0.0729001	-0.140729	-0.0544407
	0.826645	0.998874	2.22904	2.97514			0.00937444	-0.0870563	-0.128341	-0.0610693
	0.824298	1.00045	2.24833	2.98207			0.00505979	-0.0749027	-0.107921	-0.0705853
	0.833474	0.955901	2.24118	2.98049			0.00140175	-0.0367924	-0.103386	-0.074805
	0.84555	0.906025	2.19869	2.96459			-0.0022028	-0.01968	-0.141316	-0.0624773
	0.850359	0.901834	2.14375	2.9426			-0.00793301	-0.0401625	-0.215121	-0.0466059
	0.857459	0.935619	2.11802	2.93321			-0.0163419	-0.0746415	-0.269941	-0.0527818
	0.870734	0.968102	2.13062	2.94713			-0.0246488	-0.0905957	-0.263942	-0.0689132
	0.875678	0.978677	2.15829	2.97408			-0.0263124	-0.0636823	-0.213659	-0.0634121
	0.865487	0.96192	2.18725	2.99324			-0.0136698	-0.00793067	-0.166714	-0.0453072
	0.847795	0.937421	2.2182	3.00303			0.0148972	0.0223929	-0.148323	-0.0424648
	0.830584	0.942666	2.24965	3.02341			0.0462483	-0.00177488	-0.150664	-0.0603073
	0.822993	0.979426	2.28056	3.08172			0.0658011	-0.0344738	-0.153087	-0.0953582
	0.834949	1.00439	2.30758	3.16904			0.0633806	-0.0223288	-0.150307	-0.14409
	0.859757	1.00123	2.31432	3.23195			0.0367349	0.0240924	-0.157986	-0.184958
	0.875788	0.998609	2.29907	3.22706			-0.00375718	0.0608287	-0.185933	-0.197929
	0.878637	1.00755	2.27967	3.17664			-0.0386004	0.0583584	-0.214615	-0.19267
	0.880312	1.01636	2.26939	3.13168			-0.0509914	0.0153082	-0.211088	-0.174453
	0.886147	1.01799	2.26607	3.12128			-0.0425945	-0.0384513	-0.169488	-0.13118
	0.892986	1.00861	2.27539	3.14091			-0.0239052	-0.0651971	-0.129284	-0.0700279
	0.891559	0.992464	2.30171	3.15948			-0.00471045	-0.065475	-0.128491	-0.0256138
	0.869015	0.994551	2.33944	3.14876			0.000450873	-0.074902	-0.162285	-0.0205055
	0.82971	1.02464	2.38256	3.11895			-0.0147049	-0.105523	-0.205203	-0.051521
	0.807918	1.04866	2.43053	3.0992			-0.031861	-0.132064	-0.227887	-0.0970058
	0.825664	1.03596	2.46923	3.09206			-0.033281	-0.122983	-0.212901	-0.119736
	0.865449	0.999448	2.47376	3.0841			-0.0212652	-0.0775821	-0.176932	-0.101912
	0.901795	0.972026	2.43415	3.06983			0.00361203	-0.0316737	-0.161871	-0.076231
	0.92016	0.976064	2.36501	3.05758			0.0402688	-0.0273532	-0.169633	-0.0866641
	0.915179	1.00436	2.29895	3.06298			0.0645162	-0.0657646	-0.172473	-0.126144
	0.904844	1.01952	2.27113	3.09367			0.0553896	-0.0970363	-0.156634	-0.150041
	0.908488	0.998067	2.29316	3.1264			0.0290239	-0.0739936	-0.131353	-0.12898
	0.914657	0.968373	2.34496	3.13062			2.51355e-05	-0.011423	-0.114753	-0.0695354
	0.906758	0.973436	2.40115	3.11049			-0.0349999	0.0353375	-0.121656	-0.0125363
	0.90133	1.01426	2.44911	3.10955			-0.060095	0.0404704	-0.13997	-0.00119619
	0.922305	1.05178	2.48225	3.15471			-0.0590698	0.0261885	-0.139731	-0.0362916
	0.965051	1.05243	2.49399	3.2197			-0.0548425	0.0203291	-0.126478	-0.0719789
	1.0084	1.0216	2.48038	3.24969			-0.0596621	0.0315799	-0.144981	-0.0727776
	1.03173	0.996184	2.44435	3.21889			-0.0482672	0.040971	-0.211388	-0.0541387
	1.01849	1.00435	2.40048	3.15974			-0.0212708	0.0149545	-0.288055	-0.0497509
	0.973977	1.03287	2.36835	3.13771			-0.00894362	-0.0443552	-0.32829	-0.063752
	0.934059	1.04258	2.36011	3.17542			-0.0058062	-0.0863114	-0.320311	-0.0709886
	0.927584	1.01439	2.36845	3.2324			0.00957636	-0.0796918	-0.279517	-0.051194
	0.946584	0.971891	2.3711	3.25752			0.0217923	-0.0533699	-0.238817	-0.0131135
	0.968494	0.957951	2.35314	3.24452			0.0255859	-0.042701	-0.224712	0.00494844
	0.983319	0.987403	2.33201	3.22076			0.0458429	-0.0506573	-0.217486	-0.0304042
	0.991428	1.03251	2.32866	3.21817			0.0747991	-0.0629308	-0.184289	-0.100885
	0.998989	1.05224	2.3377	3.23751			0.0862844	-0.0594386	-0.130771	-0.143813
	1.01668	1.02795	2.33811	3.24182			0.084061	-0.0308761	-0.0917142	-0.127743
	1.03235	0.981081	2.32385	3.2095			0.0770757	-0.00771469	-0.0830597	-0.083539
	1.0169	0.953091	2.30562	3.16324			0.0505972	-0.0286245	-0.100174	-0.0528625
	0.973296	0.961902	2.29812	3.14779			0.0134919	-0.0757585	-0.114443	-0.048222
	0.943579	0.981909	2.31099	3.18376			-0.000888113	-0.0965567	-0.0946371	-0.0553981
	0.958569	0.98374	2.34166	3.2499			0.00535246	-0.0836314	-0.0542385	-0.0487442
	1.0012	0.972235	2.37855	3.30151			0.0126754	-0.0621594	-0.0460028	-0.0224013
	1.03985	0.964901	2.41158	3.31521			0.0198138	-0.0476831	-0.0864706	-0.00824799
	1.0637	0.967469	2.42764	3.30603			0.031046	-0.0486367	-0.133677	-0.0323462
	1.07892	0.982181	2.41681	3.29463			0.0386281	-0.0571796	-0.142475	-0.0700991
	1.09652	0.999257	2.39092	3.28675			0.0467144	-0.0340208	-0.115151	-0.0902704
	1.12052	1.00213	2.38132	3.27563			0.06522	0.0277203	-0.0899766	-0.0980495
	1.13144	1.00034	2.40373	3.25985			0.0874914	0.0723661	-0.101503	-0.107077
	1.10464	1.01952	2.44334	3.25409			0.0980053	0.0716952	-0.14509	-0.118426
	1.05281	1.04554	2.47452	3.27117			0.0907568	0.0576639	-0.183091	-0.136236
	1.01768	1.0424	2.47776	3.30596			0.0719522	0.0575743	-0.179016	-0.151016
	1.02057	1.01543	2.44776	3.33163			0.0511842	0.0689984	-0.146134	-0.140497
	1.05399	0.999735	2.40675	3.33548			0.0423129	0.0807874	-0.129254	-0.119799
	1.09967	1.01143	2.39031	3.32928			0.0484377	0.0677753	-0.148091	-0.131535
	1.13411	1.04759	2.40651	3.33645			0.0547577	0.0146116	-0.18543	-0.172812
	1.14413	1.09203	2.44016	3.36075			0.0451217	-0.0416979	-0.217998	-0.200974
	1.14529	1.10757	2.4731	3.38108			0.0156985	-0.0555099	-0.232346	-0.199006
	1.15132	1.08013	2.49093	3.37269			-0.0172922	-0.0389771	-0.234905	-0.171845
	1.14836	1.04594	2.48787	3.33728			-0.0372039	-0.0373136	-0.247857	-0.132554
	1.12071	1.03477	2.48409	3.3156			-0.0374205	-0.0630528	-0.273067	-0.11256
	1.07874	1.03133	2.4985	3.34447			-0.0228803	-0.0898865	-0.278207	-0.128646
	1.0487	1.01678	2.52101	3.40638			-0.00899792	-0.0894337	-0.239922	-0.14805
	1.04703	0.997148	2.53158	3.45092			-0.00511769	-0.0481483	-0.18275	-0.136723
	1.0764	0.985482	2.528	3.44448			-0.00535262	0.0128714	-0.14938	-0.112538
	1.11783	1.0014	2.51907	3.38956			-0.00323849	0.0503253	-0.154922	-0.109674
	1.14288	1.05158	2.51719	3.32777			-0.00832417	0.0504779	-0.174978	-0.135461
	1.14786	1.09571	2.53216	3.30595			-0.0241853	0.0472291	-0.185997	-0.179705
	1.14921	1.08969	2.56067	3.32186			-0.0393244	0.0673001	-0.18447	-0.221082
	1.15026	1.04674	2.58284	3.33277			-0.0481795	0.0933824	-0.188774	-0.231519
	1.14529	1.01945	2.58609	3.32339			-0.050504	0.0921498	-0.215238	-0.210086
	1.13448	1.03368	2.57428	3.31604			-0.0367085	0.0486314	-0.248419	-0.186834
	1.11706	1.07352	2.55843	3.33193			-0.0130851	-0.0188805	-0.247181	-0.172165
	1.09574	1.10264	2.54574	3.36463			-0.000760776	-0.0697836	-0.204436	-0.149168
	1.08832	1.09634	2.53715	3.38133			0.00784887	-0.0789502	-0.155392	-0.113645
	1.09788	1.06712	2.52154	3.35269			0.0297314	-0.0620764	-0.129627	-0.0814095
	1.09949	1.04889	2.48937	3.29949			0.0488166	-0.0570923	-0.131442	-0.0632187
	1.08242	1.05186	2.45655	3.27418			0.049566	-0.0732326	-0.150945	-0.0668754
	1.06191	1.05613	2.44915	3.30146			0.0467556	-0.0819917	-0.165139	-0.0956031
	1.04951	1.04811	2.47444	3.35234			0.0441304	-0.0631867	-0.166919	-0.127125
	1.05012	1.03863	2.51526	3.38297			0.0313022	-0.0348394	-0.173866	-0.139057
	1.0677	1.04986	2.55197	3.36936			0.0292043	-0.0258528	-0.192838	-0.137756
	1.0928	1.08846	2.57196	3.33124			0.0528136	-0.0468527	-0.194769	-0.140386
	1.10889	1.13143	2.57841	3.30782			0.0703576	-0.0838151	-0.159133	-0.145532
	1.12024	1.14393	2.57832	3.31834			0.0673957	-0.0920358	-0.110897	-0.141572
	1.14255	1.11393	2.57646	3.33591			0.0693156	-0.048158	-0.0899043	-0.125034
	1.16769	1.07009	2.57272	3.32552			0.0749362	0.00568452	-0.114121	-0.101332
	1.17212	1.05076	2.56388	3.29052			0.0667807	0.017239	-0.163942	-0.0785494
	1.15146	1.06269	2.54935	3.26436			0.0579464	-0.00901956	-0.198854	-0.0677529
	1.11734	1.07958	2.54105	3.27337			0.0587284	-0.0344757	-0.182591	-0.0703573
	1.08383	1.07468	2.54695	3.30805			0.0483709	-0.0303992	-0.131857	-0.0717425
	1.06855	1.04859	2.5547	3.33314			0.0363747	0.00958166	-0.101986	-0.0665056
	1.07941	1.0239	2.5507	3.32575			0.0576411	0.0580365	-0.117616	-0.0742243
	1.09958	1.02272	2.53634	3.30973			0.0956262	0.0682443	-0.154684	-0.109148
	1.10829	1.04247	2.5228	3.32336			0.11305	0.0414051	-0.183906	-0.157503
	1.1119	1.05289	2.52455	3.3615			0.108507	0.025164	-0.188712	-0.199513
	1.12084	1.03529	2.5399	3.38589			0.0911822	0.0376981	-0.173378	-0.219523
	1.1235	1.01628	2.55128	3.37014			0.0542939	0.0466239	-0.164426	-0.202914
	1.10476	1.02916	2.55229	3.32657			0.0101187	0.0298727	-0.176519	-0.16255
	1.06765	1.06571	2.56181	3.29598			-0.0183486	-0.00497903	-0.181088	-0.132531
	1.02941	1.08987	2.58942	3.30552			-0.0354719	-0.0425947	-0.153305	-0.125128
	1.00737	1.08222	2.62692	3.34235			-0.0471291	-0.0524411	-0.109904	-0.127696
	1.01223	1.04689	2.66956	3.36698			-0.0401938	-0.0151755	-0.088481	-0.130759
	1.04016	1.01192	2.71137	3.36082			-0.0122032	0.0336289	-0.104678	-0.128657
	1.06516	1.01561	2.73562	3.3358			0.0170277	0.0522636	-0.14692	-0.110412
	1.07231	1.05414	2.73463	3.32327			0.0352009	0.061446	-0.186938	-0.0819312
	1.077	1.07997	2.72354	3.33544			0.0420637	0.0918211	-0.201063	-0.0633371
	1.09391	1.07644	2.7149	3.35575			0.0396142	0.122221	-0.190141	-0.0556878
	1.1134	1.07277	2.70992	3.3618			0.0354	0.117616	-0.175421	-0.050563
	1.12327	1.08722	2.70411	3.35471			0.0324086	0.0646858	-0.164199	-0.0567417
	1.12056	1.11645	2.69274	3.35338			0.0252769	-0.0230289	-0.141131	-0.0701406
	1.10511	1.15377	2.67652	3.36847			0.00577479	-0.0922877	-0.106899	-0.0631228
	1.09051	1.17778	2.67511	3.39332			-0.0182017	-0.0902828	-0.0899832	-0.0309588
	1.09862	1.17004	2.69793	3.41054			-0.0307456	-0.0360782	-0.108412	-0.00170039
	1.12815	1.15241	2.72282	3.41551			-0.0251083	-0.00388509	-0.150459	0.011957
	1.15433	1.15184	2.72821	3.42965			-0.00406722	-0.0250952	-0.189351	0.0133099
	1.16527	1.14938	2.7224	3.47556			0.0223924	-0.0672068	-0.192346	-0.00388663
	1.16361	1.12228	2.71549	3.5383			0.0445538	-0.086002	-0.156369	-0.0312922
	1.15341	1.08607	2.70627	3.57009			0.0522036	-0.068641	-0.118206	-0.0484623
	1.14178	1.06362	2.69197	3.54306			0.0467102	-0.0338733	-0.11397	-0.0617567
	1.13275	1.06475	2.66988	3.47501			0.0424852	-0.0121575	-0.13242	-0.0824915
	1.11936	1.08887	2.63628	3.41386			0.0504761	-0.0179361	-0.143056	-0.0963025
	1.10126	1.11541	2.6106	3.40289			0.0688642	-0.0275048	-0.136258	-0.0916164
	1.10063	1.11073	2.61709	3.43879			0.086325	-0.0110528	-0.125125	-0.0839675
	1.13265	1.07875	2.65036	3.47554			0.0857922	0.0176903	-0.119922	-0.0839272
	1.17762	1.05388	2.68267	3.4845			0.0592021	0.0249086	-0.125299	-0.0837652
	1.21255	1.04855	2.69391	3.48264			0.0250458	0.0103911	-0.134418	-0.0801182
	1.22842	1.04912	2.68177	3.4851			0.00337047	0.00717575	-0.130152	-0.0727165
	1.22463	1.04398	2.66066	3.48672			-0.0114511	0.0361041	-0.10674	-0.0562262
	1.21579	1.03379	2.65239	3.48052			-0.0239075	0.084841	-0.0888275	-0.0351926
	1.21767	1.03006	2.65585	3.46626			-0.0140846	0.110587	-0.0917941	-0.0301066
	1.21798	1.04692	2.65025	3.44526			0.0212315	0.0775854	-0.104241	-0.0436346
	1.19871	1.0786	2.62987	3.43174			0.0538772	0.00124843	-0.112347	-0.0553504
	1.17421	1.10014	2.61693	3.43044			0.0717286	-0.0611069	-0.110762	-0.0548037
	1.16781	1.09897	2.63264	3.42771			0.0761454	-0.0736006	-0.0960429	-0.0492319
	1.17981	1.08875	2.68041	3.41336			0.060667	-0.0583372	-0.0819568	-0.0431486
	1.20233	1.08959	2.74302	3.39759			0.036664	-0.0501745	-0.0848837	-0.044486
	1.21849	1.10612	2.79553	3.39153			0.0287883	-0.0557438	-0.0887597	-0.0619448
	1.20347	1.12549	2.82618	3.40338			0.0245511	-0.063532	-0.077231	-0.0845956
	1.16494	1.12478	2.84134	3.43395			0.0025907	-0.0600023	-0.0610023	-0.0963032
	1.14303	1.09707	2.84591	3.45919			-0.0136729	-0.0366923	-0.059529	-0.101538
	1.15138	1.06652	2.83681	3.45004			-0.00313968	-0.0141108	-0.0687577	-0.109452
	1.16319	1.06261	2.81387	3.41169			0.0077542	-0.0239336	-0.0757504	-0.116801
	1.159	1.08978	2.78383	3.38204			0.00533944	-0.0509732	-0.0739232	-0.116377
	1.14734	1.12492	2.75731	3.3867			0.00445092	-0.0509914	-0.0645037	-0.107547
	1.14149	1.14636	2.74685	3.41814			-0.00641271	-0.0204045	-0.0586577	-0.0910906
	1.14615	1.1555	2.75062	3.45316			-0.0334744	0.0129201	-0.0725181	-0.0677125
	1.16073	1.16608	2.75972	3.46982			-0.04208	0.023226	-0.100725	-0.0475531
	1.16999	1.17861	2.7712	3.47216			-0.0122291	-0.00480217	-0.120191	-0.046424
	1.16135	1.1761	2.78816	3.48075			0.0260932	-0.0536322	-0.121102	-0.068395
	1.15067	1.14038	2.80493	3.49654			0.0543055	-0.0703076	-0.120056	-0.109177
	1.15981	1.07694	2.815	3.50106			0.0793603	-0.0368893	-0.121738	-0.162967
	1.18137	1.02769	2.80659	3.48769			0.0859348	0.000789686	-0.11745	-0.211119
	1.19202	1.04111	2.76942	3.4729			0.0637617	0.00941661	-0.100014	-0.229645
	1.18621	1.10543	2.71787	3.46911			0.0347704	0.00441349	-0.0695124	-0.217673
	1.1744	1.15594	2.68453	3.48345			0.0112529	0.00554813	-0.0351324	-0.189285
	1.16445	1.15114	2.68895	3.50482			-0.0150997	0.0181961	-0.021195	-0.147268
	1.16463	1.10055	2.72705	3.51241			-0.0346938	0.0469238	-0.0386596	-0.0989891
	1.17245	1.04172	2.78376	3.50052			-0.0280699	0.0746062	-0.0675377	-0.0587405
	1.1697	1.01724	2.83528	3.48492			-0.00406713	0.0685844	-0.0869506	-0.0241992
	1.14525	1.03609	2.87062	3.47553			0.0196981	0.0430468	-0.0946998	0.0102472
	1.11873	1.05572	2.90034	3.46771			0.0350333	0.0385459	-0.0933578	0.031225
	1.12079	1.04336	2.92635	3.45186			0.0344728	0.04804	-0.0829646	0.0294896
	1.14827	1.02274	2.92628	3.42097			0.0142743	0.038985	-0.0665172	0.011811
	1.17317	1.01939	2.88905	3.38551			-0.00649674	0.0104076	-0.0505728	-0.0196724
	1.17883	1.02431	2.83288	3.36512			-0.00938237	-0.0190825	-0.0404934	-0.0591282
	1.16762	1.02902	2.78886	3.36148			-0.000365498	-0.0326598	-0.0431879	-0.0786481
	1.15498	1.03494	2.78286	3.36099			0.00925578	-0.00688332	-0.0656285	-0.0628793
	1.16036	1.0338	2.82192	3.35232			0.0199205	0.0490744	-0.0945409	-0.0363763
	1.17974	1.03099	2.87473	3.34155			0.0426217	0.0870463	-0.1056	-0.0214403
	1.18568	1.04506	2.90404	3.34551			0.0752572	0.0898558	-0.0913725	-0.00783467
	1.16885	1.05966	2.91122	3.3807			0.100218	0.0882237	-0.0724404	0.0109903
	1.15101	1.04297	2.92574	3.43543			0.096627	0.0971097	-0.0617449	0.0288245
	1.15139	1.01192	2.95302	3.47166			0.0587821	0.0907552	-0.058238	0.0476012
	1.16802	1.01368	2.97596	3.46703			0.00974553	0.0499737	-0.0570992	0.0633679
	1.18932	1.05386	2.97749	3.43072			-0.019311	-0.0115591	-0.0508614	0.0577745
	1.19764	1.10388	2.9537	3.38589			-0.0180656	-0.0615284	-0.032301	0.0406764
	1.17794	1.13445	2.9274	3.34968			-0.00302385	-0.0682285	-0.0126972	0.0385812
	1.14336	1.12669	2.93224	3.33588			0.00828168	-0.0293792	-0.00302936	0.0408152
	1.12074	1.09712	2.96295	3.34192			0.0132222	0.0140612	0.00138474	0.0276862
	1.11943	1.09155	2.97436	3.35196			0.0151746	0.013052	0.0098267	0.0111181
	1.12992	1.12229	2.9432	3.36326			0.0205284	-0.030921	0.0109117	0.00660928
	1.14252	1.14864	2.88907	3.3852			0.0319697	-0.075689	-0.00783721	0.0133995
	1.14911	1.13737	2.8443	3.40422			0.0315925	-0.0894591	-0.044746	0.034782
	1.14655	1.09718	2.83005	3.39926			0.00117792	-0.0714011	-0.0881274	0.0659524
	1.14707	1.05567	2.84681	3.36711			-0.0377456	-0.0431813	-0.121161	0.0840332
	1.15396	1.04298	2.86791	3.31926			-0.0521954	-0.0271613	-0.124484	0.076259
	1.15127	1.06721	2.87095	3.27588			-0.0408758	-0.0251506	-0.104037	0.0577342
	1.14057	1.09779	2.8648	3.25554			-0.0190401	-0.0143777	-0.0971328	0.0426137
	1.13929	1.09918	2.86863	3.25061			0.00387553	0.0151163	-0.118239	0.0270685
	1.14901	1.078	2.88306	3.24597			0.0103656	0.0379525	-0.147132	0.00700183
	1.16337	1.07189	2.89335	3.25111			-0.00626667	0.024438	-0.167525	-0.015355
	1.18081	1.09955	2.88139	3.2823			-0.016937	-0.0154206	-0.178416	-0.0409773
	1.19162	1.1375	2.84772	3.33026			-0.00848763	-0.0477242	-0.176015	-0.0675186
	1.18533	1.14311	2.82056	3.37024			-0.00561355	-0.0583296	-0.166959	-0.0865656
	1.1763	1.10387	2.82674	3.37671			-0.0098622	-0.0540975	-0.158425	-0.0999318
	1.18151	1.05263	2.84972	3.3428			0.000904394	-0.0470979	-0.134192	-0.116166
	1.19012	1.03423	2.85496	3.29789			0.0146056	-0.0541213	-0.0858461	-0.123453
	1.18647	1.05485	2.83095	3.28791			0.0111031	-0.0679709	-0.0400111	-0.104244
	1.17539	1.08053	2.80221	3.32153			0.00523194	-0.0558159	-0.0227956	-0.062629
	1.16616	1.08389	2.80127	3.3618			0.00498423	-0.0144124	-0.0364696	-0.0181653
	1.16375	1.07259	2.83764	3.36567			-0.00618579	0.0169952	-0.0666575	0.00992363
	1.17195	1.06881	2.88438	3.3227			-0.0147566	0.0153853	-0.098753	0.00934753
	1.18427	1.07839	2.9104	3.26373			0.00452613	-0.0128957	-0.117392	-0.0163929
	1.18081	1.08788	2.91432	3.23035			0.0297762	-0.05374	-0.129438	-0.0450388
	1.16113	1.08006	2.91574	3.24633			0.0366545	-0.0736885	-0.149414	-0.0565923
	1.15503	1.04582	2.92514	3.29154			0.0384647	-0.0529375	-0.169738	-0.053939
	1.17839	0.998421	2.93114	3.33291			0.0418688	-0.0307281	-0.16869	-0.0545406
	1.20892	0.966921	2.91547	3.35191			0.0358778	-0.0468428	-0.154102	-0.0588829
	1.22215	0.961516	2.87872	3.34866			0.0305542	-0.0764628	-0.155074	-0.0578032
	1.21232	0.960557	2.85464	3.33278			0.0417535	-0.0784079	-0.176014	-0.051696
	1.19028	0.945617	2.87384	3.3186			0.0493323	-0.0517992	-0.197243	-0.040858
	1.17643	0.92812	2.9223	3.3114			0.037202	-0.0139135	-0.202311	-0.0263108
	1.18642	0.929335	2.95727	3.30193			0.0196749	0.0184843	-0.183681	-0.0257002
	1.21153	0.954285	2.94978	3.28535			0.00629299	0.0245663	-0.151984	-0.0454097
	1.22151	0.994001	2.91028	3.26562			-0.00786191	0.0112022	-0.136461	-0.0619206
	1.20646	1.02509	2.88389	3.24731			-0.0197073	0.0133681	-0.146692	-0.066515
	1.188	1.03403	2.90332	3.23417			-0.0243341	0.0319509	-0.15856	-0.0719847
	1.18425	1.04145	2.94909	3.22552			-0.0281782	0.0262449	-0.157569	-0.0738671
	1.18858	1.06814	2.97588	3.22146			-0.0267953	-0.00773733	-0.158806	-0.0670889
	1.18842	1.09517	2.97152	3.22647			-0.0088588	-0.0328089	-0.175682	-0.0612976
	1.1785	1.09848	2.95305	3.24241			0.0205761	-0.0327313	-0.207446	-0.0514942
	1.15899	1.0882	2.93802	3.25538			0.0418106	-0.0149868	-0.236736	-0.0278826
	1.14527	1.0786	2.9264	3.25778			0.0495145	0.00695437	-0.24439	-0.0124439
	1.15664	1.07389	2.90857	3.25674			0.0544069	0.00650932	-0.224118	-0.0252364
	1.17998	1.08471	2.87728	3.26113			0.0609735	-0.0196106	-0.198317	-0.0459759
	1.18787	1.10531	2.85178	3.27109			0.0663296	-0.0215757	-0.193687	-0.0506352
	1.18363	1.09995	2.85842	3.27199			0.064435	0.0298024	-0.212573	-0.0463928
	1.18782	1.06689	2.89011	3.24834			0.058194	0.0920972	-0.233261	-0.0445973
	1.20512	1.05124	2.91185	3.20712			0.0530212	0.116512	-0.239146	-0.0413738
	1.22698	1.07305	2.90671	3.18421			0.0509577	0.0979987	-0.226157	-0.0416825
	1.2362	1.10588	2.88276	3.2029			0.0508625	0.0618403	-0.20031	-0.0405366
	1.21877	1.12283	2.85235	3.24636			0.0445231	0.0347282	-0.17464	-0.0175247
	1.18512	1.11405	2.83353	3.27427			0.0328234	0.0312437	-0.167258	0.0184989
	1.16843	1.0818	2.83921	3.26349			0.0280518	0.0388824	-0.170391	0.0254143
	1.18258	1.05416	2.85264	3.22656			0.0355882	0.0261877	-0.164416	-0.00442422
	1.20469	1.05867	2.84919	3.19998			0.0448521	-0.0118801	-0.151675	-0.0407652
	1.21041	1.0778	2.83238	3.2082			0.0483256	-0.0416087	-0.147658	-0.0650369
	1.19517	1.08531	2.82076	3.23607			0.043508	-0.0316431	-0.148241	-0.0673828
	1.17152	1.08727	2.82394	3.24675			0.0220703	0.00966268	-0.139247	-0.0448918
	1.16505	1.09864	2.83211	3.23473			-0.0100226	0.0532049	-0.125157	-0.0260205
	1.18682	1.11557	2.82187	3.223			-0.0294535	0.0719793	-0.120823	-0.0373957
	1.2127	1.12714	2.78242	3.22298			-0.0304087	0.0561862	-0.133721	-0.0617634
	1.21386	1.12384	2.74614	3.22551			-0.0211649	0.0273847	-0.160293	-0.0713257
	1.1987	1.10212	2.75299	3.21783			0.00257386	0.0156355	-0.18318	-0.0660493
	1.19161	1.08039	2.79669	3.19066			0.0352525	0.0195518	-0.183009	-0.059486
	1.19656	1.08346	2.83234	3.16197			0.0542162	0.0194681	-0.173391	-0.060467
	1.20996	1.10892	2.83724	3.1656			0.0600789	0.015781	-0.187432	-0.0652522
	1.22327	1.12912	2.8292	3.20411			0.0686672	0.0225935	-0.225256	-0.0600236
	1.22426	1.12326	2.84197	3.24475			0.0673933	0.0395734	-0.253692	-0.0278612
	1.21988	1.09221	2.88418	3.26159			0.0432115	0.0533164	-0.259159	0.02321
	1.22473	1.05755	2.92858	3.24646			0.0210832	0.0507348	-0.250171	0.0580862
	1.22629	1.04659	2.93546	3.20805			0.0146169	0.0278915	-0.243165	0.0592887
	1.20535	1.06359	2.90021	3.17051			0.00471012	-0.00576157	-0.25402	0.0487369
	1.17334	1.08265	2.85988	3.14736			-0.00629	-0.0201233	-0.284407	0.0567459
	1.15735	1.07825	2.84956	3.13717			-0.0055127	0.000623186	-0.299981	0.0845635
	1.16409	1.05843	2.86619	3.13703			-0.0121217	0.0278758	-0.285201	0.114782
	1.185	1.0503	2.87597	3.14868			-0.0281086	0.0306708	-0.262893	0.124277
	1.20502	1.06157	2.85648	3.16849			-0.021283	0.0140623	-0.25319	0.10162
	1.2026	1.07544	2.82557	3.19833			-0.00537961	-0.00598901	-0.246757	0.0660219
	1.17395	1.07169	2.81991	3.23451			-0.0245434	-0.0178261	-0.229394	0.0511099
	1.14933	1.04965	2.84706	3.25954			-0.0615442	-0.00924604	-0.19822	0.0602981
	1.15383	1.02952	2.87432	3.26208			-0.065897	0.00660286	-0.161331	0.0717585
	1.17449	1.03282	2.86924	3.2521			-0.0418466	0.000203392	-0.142283	0.0710933
	1.18383	1.05462	2.8366	3.24769			-0.012761	-0.0144544	-0.159852	0.0650394
	1.17632	1.06499	2.81393	3.24965			0.0156238	0.00134175	-0.193293	0.0646932
	1.16155	1.04701	2.82225	3.245			0.0280469	0.0424929	-0.20197	0.0703047
	1.14631	1.02111	2.83874	3.22626			0.015448	0.0776877	-0.179173	0.0735324
	1.13956	1.0178	2.83381	3.19668			0.00157231	0.0912827	-0.155439	0.0627731
	1.14209	1.04835	2.81386	3.16751			0.00590916	0.0780591	-0.156372	0.0368696
	1.14503	1.09736	2.81206	3.14567			0.0118235	0.0424776	-0.182244	0.0200642
	1.14756	1.12808	2.84576	3.13122			0.0103395	0.0178877	-0.210659	0.0309439
	1.16054	1.10745	2.90124	3.12347			0.0151349	0.0279063	-0.210244	0.0550697
	1.18863	1.04871	2.93663	3.13914			0.0309815	0.0489855	-0.182987	0.0741014
	1.21393	1.00858	2.92607	3.18557			0.0534978	0.0540415	-0.171358	0.0899739
	1.21826	1.01348	2.88919	3.24153			0.0792738	0.0517996	-0.202701	0.100396
	1.20153	1.03582	2.86574	3.27552			0.0953469	0.0525196	-0.248822	0.0992358
	1.17049	1.05127	2.86345	3.26785			0.0798384	0.0473832	-0.273604	0.0988284
	1.13845	1.06136	2.86591	3.23045			0.037378	0.0401083	-0.268188	0.0991913
	1.12701	1.07016	2.85826	3.19992			-0.000415146	0.0345196	-0.248286	0.0824917
	1.14159	1.08395	2.83799	3.20582			-0.00828377	0.0124813	-0.236716	0.0552011
	1.15668	1.10032	2.81975	3.23564			0.00999728	-0.0208451	-0.249554	0.0436609
	1.15249	1.09076	2.8252	3.25784			0.0337227	-0.0332727	-0.273409	0.0490202
	1.1352	1.04213	2.84725	3.25009			0.0492534	-0.0198872	-0.277379	0.0586623
	1.11554	0.995184	2.85348	3.21348			0.0528588	-0.00584948	-0.250531	0.0683097
	1.09971	0.990954	2.83388	3.17719			0.0528163	0.00286074	-0.221235	0.075409
	1.09866	1.02	2.8145	3.16633			0.0555297	0.00957307	-0.20964	0.0786828
	1.11031	1.054	2.82197	3.17281			0.0587469	0.00976346	-0.207346	0.0980818
	1.12154	1.07886	2.85736	3.17928			0.0555369	0.0108492	-0.195325	0.142651
	1.13378	1.08468	2.89275	3.1863			0.0464963	0.0202062	-0.169306	0.17349
	1.15105	1.07911	2.88524	3.20418			0.0447475	0.0297622	-0.147909	0.152109
	1.16147	1.0848	2.82513	3.23425			0.0539816	0.0296549	-0.160946	0.0998167
	1.15354	1.10231	2.75996	3.26777			0.0682983	0.027822	-0.211583	0.0640439
	1.13408	1.10229	2.74602	3.28166			0.0832638	0.0335297	-0.250257	0.0670675
	1.11817	1.0738	2.78391	3.25884			0.0938561	0.0380499	-0.233178	0.101017
	1.11532	1.04049	2.828	3.21308			0.0963916	0.029137	-0.182075	0.131953
	1.132	1.01908	2.83578	3.18354			0.0960326	0.00714463	-0.152936	0.126581
	1.15619	1.01077	2.80785	3.18856			0.0900355	-0.019545	-0.165917	0.104677
	1.16243	1.01043	2.77901	3.21608			0.0612644	-0.0380371	-0.194357	0.11435
	1.15016	1.00363	2.78319	3.24684			0.0196217	-0.0279289	-0.199043	0.154298
	1.13893	0.983583	2.81301	3.27288			0.00126412	0.0123036	-0.169237	0.176474
	1.13493	0.969789	2.83725	3.29596			0.0168384	0.049862	-0.138144	0.152851
	1.1319	0.980535	2.84627	3.31986			0.0492769	0.0635646	-0.154778	0.0967911
	1.12813	1.00649	2.86145	3.33373			0.0861425	0.0626374	-0.212643	0.0483575
	1.11848	1.03083	2.89577	3.31387			0.108156	0.0570889	-0.256274	0.0527924
	1.10539	1.0474	2.93288	3.26367			0.0993022	0.0418217	-0.252187	0.114584
	1.11498	1.05598	2.94653	3.2191			0.0848552	0.0142535	-0.231241	0.180492
	1.15766	1.06414	2.93139	3.20714			0.0914747	-0.0218622	-0.23166	0.191258
	1.19726	1.07928	2.91474	3.22555			0.0958913	-0.0585428	-0.259596	0.150559
	1.20044	1.09247	2.92495	3.25835			0.0765555	-0.0798198	-0.286147	0.10553
	1.16734	1.08674	2.95207	3.28211			0.0608421	-0.0766873	-0.27747	0.0791463
	1.11535	1.0643	2.95981	3.29099			0.0665314	-0.0642029	-0.237671	0.0552287
	1.0714	1.04416	2.92799	3.30203			0.0790377	-0.0654418	-0.21681	0.0186001
	1.06194	1.04366	2.87559	3.31752			0.0976719	-0.0812239	-0.247718	-0.0208887
	1.07766	1.06078	2.84751	3.31459			0.12337	-0.0971137	-0.296235	-0.0296769
	1.08457	1.07715	2.87083	3.28009			0.123289	-0.107844	-0.309127	0.0153263
	1.07991	1.07803	2.91743	3.22948			0.0903769	-0.103705	-0.280007	0.0880738
	1.09126	1.06594	2.9348	3.18953			0.0632132	-0.0759807	-0.238921	0.125975
	1.12184	1.05594	2.90574	3.17674			0.054524	-0.0441161	-0.215559	0.10509
	1.14896	1.05477	2.86215	3.1854			0.0479055	-0.0213061	-0.214312	0.0607636
	1.16383	1.048	2.84943	3.18669			0.048828	0.00786218	-0.215838	0.0343328
	1.16936	1.02483	2.88003	3.16768			0.065472	0.0383567	-0.200799	0.0287639
	1.16654	1.00113	2.91806	3.14187			0.0762845	0.0339732	-0.180608	0.0168237
	1.16335	0.999611	2.91683	3.13378			0.0808382	-0.00796898	-0.184471	-0.0311193
	1.16944	1.01532	2.87984	3.15002			0.101567	-0.0605272	-0.213136	-0.104715
	1.17623	1.0268	2.84337	3.17957			0.125058	-0.106634	-0.236689	-0.148245
	1.16603	1.0247	2.83339	3.2035			0.124066	-0.130188	-0.227708	-0.118191
	1.14405	1.0094	2.84816	3.2015			0.105282	-0.123752	-0.187233	-0.0464054
	1.13145	0.9916	2.87085	3.17638			0.0881446	-0.113095	-0.140153	-0.0104905
	1.1384	0.994679	2.87883	3.15099			0.06944	-0.119805	-0.128844	-0.0366848
	1.15945	1.02402	2.87001	3.14423			0.0478215	-0.120253	-0.166195	-0.0842612
	1.18001	1.05016	2.8656	3.15509			0.0339633	-0.0891482	-0.210524	-0.100878
	1.18501	1.05259	2.87044	3.17705			0.0302084	-0.0488729	-0.210253	-0.069688
	1.1685	1.0457	2.86272	3.19926			0.0338257	-0.0314343	-0.173142	-0.0217457
	1.14798	1.0399	2.8345	3.21253			0.0466317	-0.0382585	-0.147172	-0.017504
	1.14883	1.02943	2.80364	3.21725			0.0636221	-0.0527722	-0.157964	-0.0673919
	1.16843	1.02051	2.79339	3.21112			0.0643686	-0.0550686	-0.184447	-0.109981
	1.18401	1.0126	2.81546	3.19435			0.0428587	-0.0238481	-0.192163	-0.0955536
	1.18676	0.99162	2.8578	3.17926			0.0126239	0.0280625	-0.170149	-0.0469899
	1.17909	0.969593	2.88228	3.18227			-0.0105029	0.0514977	-0.151326	-0.0124863
	1.16471	0.969886	2.87329	3.20674			-0.0187124	0.0332619	-0.175075	-0.0171389
	1.1561	0.970985	2.86306	3.24009			-0.0128163	0.00366317	-0.236011	-0.0518676
	1.16225	0.944771	2.87923	3.25338			0.000843913	-0.0154007	-0.280617	-0.0684537
	1.16887	0.906082	2.90493	3.21972			0.0131718	-0.0207608	-0.268931	-0.0287979
	1.16048	0.877809	2.90889	3.16315			0.0270076	-0.0112779	-0.218776	0.030021
	1.14617	0.862887	2.8791	3.1314			0.0452082	-0.00317035	-0.174399	0.0394929
	1.14197	0.866977	2.82366	3.13976			0.0545994	-0.0207962	-0.161948	-0.00275489
	1.14913	0.890415	2.77427	3.16073			0.0390231	-0.0548051	-0.175884	-0.0316475
	1.16291	0.909946	2.75512	3.15978			0.0033339	-0.0734631	-0.186504	-0.00791386
	1.17234	0.920114	2.75544	3.12474			-0.0244616	-0.064075	-0.172722	0.0422075
	1.1668	0.943557	2.75445	3.08231			-0.0231287	-0.0419669	-0.158406	0.0634585
	1.15751	0.984092	2.76625	3.07022			0.00831077	-0.0269625	-0.180352	0.0233381
	1.16455	1.01656	2.81167	3.0881			0.0501281	-0.0269121	-0.227534	-0.0486869
	1.18522	1.02574	2.88093	3.10565			0.0715901	-0.0407666	-0.252712	-0.0797889
	1.1975	1.01652	2.9394	3.11325			0.0629438	-0.0555768	-0.241513	-0.0459894
	1.19564	0.993393	2.95527	3.12955			0.0511118	-0.0587112	-0.221729	-0.00806065
	1.18923	0.966896	2.91635	3.16408			0.0542108	-0.0553195	-0.230112	-0.017329
	1.18612	0.956031	2.85073	3.2089			0.0599494	-0.0592516	-0.268658	-0.0496948
	1.19268	0.965879	2.80619	3.24698			0.0606971	-0.065269	-0.295953	-0.0516844
	1.20158	0.989514	2.79866	3.25743			0.0596372	-0.0636697	-0.257272	-0.00676172
	1.1893	1.02006	2.8003	3.23219			0.0502138	-0.0628874	-0.163088	0.0560119
	1.15721	1.04452	2.78912	3.19448			0.0339175	-0.0657566	-0.0913084	0.0827944
	1.13517	1.04461	2.77832	3.17142			0.0291039	-0.0621073	-0.0989438	0.0522373
	1.1364	1.01776	2.79179	3.16706			0.0299253	-0.0517519	-0.158837	0.00569393
	1.14736	0.97525	2.83191	3.17385			0.0189596	-0.043328	-0.205898	-0.00187629
	1.15802	0.935137	2.87494	3.18305			0.0148454	-0.0389984	-0.208236	0.0230365
	1.16338	0.91651	2.89351	3.18246			0.0357771	-0.0422276	-0.18329	0.0269011
	1.16177	0.927142	2.88999	3.17802			0.0561248	-0.0583343	-0.177245	-0.0205061
	1.17028	0.952138	2.88966	3.18611			0.0571531	-0.0690363	-0.215231	-0.0856236
	1.20166	0.968932	2.90777	3.20268			0.0534093	-0.0511632	-0.254989	-0.110822
	1.22966	0.972491	2.93399	3.21117			0.0457941	-0.0162614	-0.245277	-0.0680424
	1.22102	0.974316	2.94298	3.21111			0.0256973	0.00770165	-0.200104	0.00885328
	1.18227	0.986276	2.91949	3.20176			0.0151024	0.0136295	-0.177368	0.0495239
	1.14477	1.01036	2.87648	3.18439			0.0312037	0.00457933	-0.201803	0.0202053
	1.12993	1.03751	2.84963	3.16728			0.0485433	-0.0236927	-0.247244	-0.0334937
	1.14379	1.05223	2.85797	3.15206			0.0566179	-0.0569784	-0.273033	-0.044076
	1.17618	1.03736	2.8885	3.12895			0.0767049	-0.0752227	-0.259372	-0.000891439
	1.19794	0.995702	2.90755	3.10615			0.100652	-0.0847132	-0.23898	0.0469472
	1.18983	0.953353	2.89573	3.10538			0.106344	-0.0870263	-0.254034	0.0475163
	1.17237	0.932618	2.86391	3.12462			0.10424	-0.0660041	-0.291975	0.00241996
	1.16903	0.936294	2.84099	3.14288			0.109319	-0.0328448	-0.294161	-0.0312877
	1.17132	0.952725	2.83742	3.13958			0.107908	-0.0156158	-0.240022	-0.000504797
	1.16547	0.965609	2.83703	3.11527			0.0985973	-0.00985394	-0.170805	0.0680939
	1.15558	0.963823	2.8263	3.09191			0.0919896	-0.00388616	-0.144362	0.09677
	1.1552	0.953015	2.811	3.09364			0.068514	-0.00864137	-0.178205	0.05745
	1.16973	0.946342	2.80448	3.12031			0.015058	-0.0153678	-0.238805	0.00851761
	1.19467	0.943027	2.82152	3.14705			-0.0355649	-0.00032243	-0.268457	0.0173709
	1.21107	0.939387	2.86115	3.16055			-0.0472277	0.0218713	-0.247204	0.0855693
	1.19729	0.954492	2.90181	3.1663			-0.0294761	0.0162597	-0.218779	0.1575
	1.16116	0.998421	2.92305	3.17275			-0.00702078	-0.0172528	-0.237611	0.174366
	1.13737	1.04464	2.92916	3.17927			0.0121276	-0.0557032	-0.293565	0.12472
	1.14379	1.06532	2.92869	3.17666			0.0235492	-0.0836667	-0.329055	0.0641373
	1.16218	1.06104	2.92207	3.15878			0.0207956	-0.0842877	-0.305735	0.0414721
	1.17062	1.03623	2.91278	3.13498			0.00576588	-0.0567925	-0.243126	0.030443
	1.17075	1.00448	2.90478	3.13045			-0.0130759	-0.032687	-0.193749	-0.0170492
	1.17122	0.998457	2.89865	3.15192			-0.0328948	-0.0327204	-0.190066	-0.0884584
	1.18141	1.02053	2.90448	3.18791			-0.0416188	-0.0319996	-0.209617	-0.134143
	1.20526	1.0275	2.9308	3.21748			-0.026488	-0.0116119	-0.204218	-0.114073
	1.22242	1.00071	2.95713	3.22519			0.00614777	0.00599657	-0.165522	-0.0280113
	1.20796	0.964577	2.96277	3.21692			0.0383245	0.00652855	-0.135721	0.0650222
	1.17641	0.937794	2.95623	3.22161			0.0565999	-0.00367959	-0.148058	0.0830565
	1.15967	0.931476	2.95767	3.25287			0.0582252	-0.0244552	-0.184796	0.0276297
	1.16018	0.954111	2.97213	3.28848			0.0425967	-0.0526109	-0.203966	-0.0150338
	1.15854	0.983623	3.00241	3.29967			0.0189205	-0.0740653	-0.190808	0.009616
	1.14208	0.987571	3.03731	3.27235			-0.00128667	-0.086101	-0.168579	0.0693281
	1.11389	0.972879	3.05094	3.21476			-0.0139163	-0.0957504	-0.173079	0.100726
	1.09228	0.965677	3.03628	3.16199			-0.0127855	-0.0919977	-0.221832	0.0754941
	1.1018	0.962202	3.01479	3.14374			0.00852979	-0.0634619	-0.277136	0.0205469
	1.13763	0.948593	3.00141	3.15013			0.0413923	-0.0210221	-0.279172	0.00558739
	1.16508	0.928162	3.00026	3.15376			0.0629403	0.0146212	-0.218804	0.0637808
	1.16599	0.905559	3.00937	3.14895			0.0633314	0.0346031	-0.161956	0.136312
	1.15466	0.887889	3.01214	3.14609			0.0493421	0.04048	-0.170397	0.144021
	1.15356	0.889816	2.98771	3.15257			0.0252808	0.0324785	-0.241086	0.0940852
	1.17318	0.914699	2.94936	3.16961			0.00126511	0.0169923	-0.310044	0.0500212
	1.20073	0.943346	2.93022	3.18847			-0.00133592	0.0033061	-0.31324	0.051506
	1.20427	0.962736	2.94423	3.19284			0.0167009	-0.0115192	-0.251585	0.0825777
	1.16835	0.975047	2.97489	3.17852			0.0380654	-0.0322997	-0.198294	0.0954958
	1.1256	0.977387	2.99758	3.15944			0.067253	-0.0478071	-0.211398	0.0596314
	1.11436	0.967525	2.99648	3.14655			0.105773	-0.0507095	-0.265977	0.0155892
	1.12968	0.955599	2.97553	3.14242			0.126171	-0.0536246	-0.299366	0.0292777
	1.14597	0.944522	2.95001	3.14653			0.117686	-0.0612309	-0.294398	0.0962067
	1.14768	0.92555	2.92708	3.15805			0.103679	-0.0678806	-0.274681	0.135258
	1.13109	0.899286	2.90713	3.17033			0.0918837	-0.0752704	-0.264818	0.0970502
	1.1133	0.876173	2.89257	3.17613			0.0762221	-0.0812636	-0.265579	0.0168813
	1.1185	0.86601	2.88904	3.15958			0.0742593	-0.0762241	-0.252995	-0.0304881
	1.14011	0.878236	2.89651	3.10638			0.0893712	-0.0619264	-0.205724	-0.0126956
	1.14813	0.91037	2.91256	3.03605			0.0932874	-0.0522715	-0.149408	0.0291734
	1.13581	0.940574	2.93092	2.99836			0.0862232	-0.04428	-0.141981	0.0255964
	1.1227	0.947656	2.94485	3.01973			0.0923408	-0.0291183	-0.19009	-0.039416
	1.1211	0.933556	2.9496	3.08105			0.0952946	-0.0176734	-0.24141	-0.100948
	1.13027	0.916662	2.94531	3.13734			0.0683611	-0.0219568	-0.245034	-0.0857055
	1.14547	0.91581	2.93424	3.14601			0.0296725	-0.0360405	-0.203154	-0.0023424
	1.15445	0.938334	2.92435	3.1139			0.00495451	-0.0556658	-0.161168	0.0653528
	1.14839	0.970455	2.92222	3.09272			-0.0101524	-0.08177	-0.16665	0.0556708
	1.14136	0.984521	2.92411	3.1151			-0.00995755	-0.0947209	-0.211914	-0.011888
	1.14938	0.961117	2.91693	3.161			0.0159289	-0.0797384	-0.235547	-0.0619917
	1.15592	0.910015	2.89627	3.19212			0.0400103	-0.0619831	-0.204575	-0.041932
	1.13079	0.861817	2.87354	3.19382			0.0426257	-0.0597942	-0.165059	0.0230339
	1.08323	0.836288	2.87027	3.17804			0.0443442	-0.0608063	-0.173903	0.0513555
	1.05106	0.837197	2.89045	3.16994			0.0571846	-0.0597737	-0.22465	0.00703195
	1.05502	0.865111	2.9126	3.1728			0.0638282	-0.054409	-0.261716	-0.0528349
	1.08762	0.906178	2.90991	3.16552			0.0621963	-0.0265426	-0.247986	-0.0524425
	1.12069	0.935759	2.88492	3.13642			0.0663236	0.0157327	-0.197993	0.0106058
	1.12575	0.946198	2.85987	3.09746			0.0665515	0.0356526	-0.17457	0.0799549
	1.10393	0.949838	2.8537	3.07333			0.0518771	0.0341327	-0.223613	0.101004
	1.08708	0.949315	2.87241	3.07504			0.0337693	0.0420222	-0.31442	0.0704074
	1.09778	0.94207	2.90237	3.09612			0.0297256	0.0613499	-0.367607	0.0393752
	1.1164	0.937472	2.92068	3.11248			0.0465559	0.070332	-0.350289	0.0642576
	1.11583	0.937143	2.92021	3.10981			0.0823854	0.059335	-0.297728	0.12512
	1.09759	0.929673	2.91109	3.09721			0.122023	0.0268334	-0.255719	0.151624
	1.0803	0.916788	2.89955	3.09462			0.137455	-0.0254595	-0.243336	0.11822
	1.07657	0.909011	2.89131	3.10326			0.115709	-0.0699642	-0.245971	0.0675626
	1.08952	0.89923	2.89621	3.10661			0.0725131	-0.0794862	-0.233894	0.0436649
	1.10596	0.883865	2.91428	3.09712			0.0333191	-0.0694512	-0.201445	0.06008
	1.09871	0.880418	2.93495	3.08203			0.00684402	-0.0733802	-0.180811	0.0944184
	1.06691	0.887316	2.95439	3.08455			-0.00459358	-0.0952779	-0.19621	0.0993419
	1.04545	0.881856	2.96268	3.11784			0.00173015	-0.119919	-0.224366	0.0645812
	1.05603	0.869243	2.94306	3.15758			0.0199232	-0.141195	-0.224521	0.0440079
	1.0827	0.872957	2.90024	3.1685			0.0413843	-0.154696	-0.192067	0.0723442
	1.10375	0.886238	2.87178	3.14838			0.0578961	-0.161284	-0.151012	0.101922
	1.10874	0.89101	2.88288	3.12445			0.0605325	-0.168789	-0.128125	0.0766401
	1.10211	0.885981	2.92064	3.11875			0.0404302	-0.170671	-0.129066	0.00676535
	1.10535	0.869952	2.94649	3.13217			0.00450029	-0.15251	-0.136058	-0.0484445
	1.12765	0.850525	2.93409	3.13921			-0.0265981	-0.119525	-0.121741	-0.0310779
	1.14436	0.850281	2.88697	3.11954			-0.0435746	-0.0912452	-0.0939812	0.0687098
	1.12632	0.871804	2.84386	3.09694			-0.0462462	-0.0706828	-0.0918447	0.174059
	1.08017	0.880294	2.83428	3.10746			-0.0352572	-0.0495193	-0.128504	0.193965
	1.04185	0.855952	2.84474	3.14179			-0.0172041	-0.0318418	-0.169766	0.135057
	1.04039	0.822049	2.84779	3.16015			-0.00262591	-0.0274938	-0.186137	0.0868932
	1.08015	0.810492	2.84375	3.14244			0.0106291	-0.036689	-0.179911	0.0976795
	1.12896	0.829462	2.84543	3.10132			0.0254813	-0.0542144	-0.174236	0.137478
	1.14507	0.859939	2.85532	3.07287			0.0252268	-0.0782141	-0.189219	0.149416
	1.12974	0.868812	2.87065	3.08154			0.00334924	-0.0964796	-0.219996	0.11164
	1.12293	0.843712	2.88011	3.11017			-0.01951	-0.0936884	-0.225539	0.0587391
	1.14249	0.815593	2.86973	3.11363			-0.0333074	-0.0771473	-0.180499	0.057951
	1.16224	0.821915	2.84194	3.07651			-0.0399067	-0.0609121	-0.12125	0.119206
	1.14816	0.854921	2.81772	3.03382			-0.0241664	-0.041833	-0.110284	0.174219
	1.09043	0.880878	2.8106	3.03103			0.01164	-0.0181242	-0.16127	0.163756
	1.02083	0.887227	2.8192	3.07337			0.0360355	-0.00274751	-0.23176	0.11087
	1.00307	0.887224	2.8291	3.1204			0.0449879	0.00436249	-0.271934	0.079488
	1.05633	0.897697	2.82916	3.1224			0.0592868	0.0102999	-0.255744	0.096155
	1.11766	0.922472	2.82876	3.07323			0.0643795	0.0106766	-0.208478	0.127257
	1.12745	0.942033	2.84994	3.02234			0.0378418	0.00636925	-0.18435	0.114813
	1.09739	0.936015	2.89436	3.01997			0.00312906	0.00551371	-0.204083	0.0414197
	1.07356	0.911403	2.93269	3.06706			-0.012332	-0.00116961	-0.227123	-0.0331379
	1.0813	0.891384	2.93208	3.1281			-0.0132968	-0.024969	-0.214118	-0.0264014
	1.1132	0.890667	2.89737	3.16959			0.00490148	-0.0481061	-0.173069	0.0607784
	1.13607	0.901807	2.8694	3.1819			0.0478852	-0.0485171	-0.137702	0.14004
	1.11995	0.90549	2.87941	3.18458			0.0781806	-0.0344997	-0.134564	0.141296
	1.08137	0.892233	2.90944	3.19809			0.0690416	-0.0238406	-0.164246	0.0898595
	1.07096	0.871245	2.92125	3.20405			0.0493529	-0.0276455	-0.188348	0.0608755
	1.09995	0.861482	2.90265	3.17914			0.0428827	-0.0581557	-0.17715	0.0952135
	1.1263	0.871744	2.88282	3.13108			0.0330559	-0.106877	-0.154165	0.154242
	1.11713	0.885181	2.89237	3.08417			0.0150152	-0.132058	-0.164924	0.161773
	1.08444	0.877108	2.92576	3.06233			0.00262399	-0.114594	-0.201608	0.0942677
	1.06071	0.852809	2.93953	3.07211			-0.00759451	-0.0885117	-0.218242	0.0224956
	1.06741	0.843851	2.90615	3.09768			-0.00372619	-0.0781358	-0.193036	0.0219345
	1.09869	0.857101	2.85242	3.11353			0.0386787	-0.0740332	-0.153344	0.0830025
	1.12194	0.872771	2.82662	3.11882			0.0961058	-0.0700225	-0.142891	0.130012
	1.10916	0.877024	2.84196	3.12681			0.113215	-0.061833	-0.181128	0.123968
	1.07849	0.864513	2.87167	3.14188			0.0788933	-0.0422506	-0.236994	0.0889727
	1.06688	0.844888	2.88711	3.15397			0.0294825	-0.0289877	-0.254616	0.0742605
	1.08056	0.846808	2.88253	3.1466			-0.00725368	-0.046214	-0.225638	0.102094
	1.09254	0.876582	2.88004	3.12106			-0.0211719	-0.0726893	-0.197681	0.139438
	1.079	0.892946	2.9061	3.10063			-0.0155042	-0.071762	-0.203191	0.127444
	1.04542	0.864248	2.94726	3.10781			-0.00517935	-0.0459792	-0.222691	0.0625661
	1.0144	0.818831	2.95705	3.13321			0.00212151	-0.0183532	-0.224703	0.00114236
	1.01192	0.800724	2.91788	3.1447			0.0187699	-0.000394972	-0.200772	-0.0174088
	1.04497	0.821504	2.85408	3.12434			0.0507333	0.00222968	-0.167966	-0.00439853
	1.08334	0.866158	2.79638	3.08904			0.0740469	-0.0106972	-0.155981	0.0109642
	1.09343	0.900283	2.75765	3.07622			0.0632952	-0.0169993	-0.176939	0.00699749
	1.08494	0.890183	2.73172	3.09709			0.0202456	-0.00500368	-0.197604	-0.0103988
	1.08818	0.854686	2.69494	3.11936			-0.0274513	-0.000541522	-0.182965	-0.000566352
	1.10508	0.849108	2.64723	3.09373			-0.0522146	-0.0206604	-0.145465	0.0557307
	1.11469	0.878175	2.62026	3.01585			-0.0455096	-0.0414751	-0.128275	0.108547
	1.10321	0.895579	2.63422	2.93311			-0.0219142	-0.0393884	-0.1444	0.0971146
	1.07423	0.882921	2.66122	2.89273			-0.0102982	-0.0230522	-0.173796	0.038308
	1.05049	0.864628	2.66779	2.90609			-0.0206941	-0.0066025	-0.189819	-0.00375866
	1.05926	0.860586	2.64649	2.94228			-0.040329	0.00287407	-0.180489	0.00388551
	1.09429	0.877852	2.61625	2.95731			-0.0545101	0.00260137	-0.158554	0.0428402
	1.117	0.902532	2.60543	2.94064			-0.0624918	0.00679318	-0.16159	0.0757452
	1.10722	0.898615	2.6268	2.92196			-0.0695499	0.0275319	-0.20251	0.0717515
	1.07634	0.862055	2.65363	2.91401			-0.0769627	0.0475611	-0.245972	0.0522609
	1.04571	0.834889	2.64848	2.89315			-0.0833559	0.0389768	-0.249312	0.0695048
	1.02914	0.840583	2.61826	2.84349			-0.0787988	0.00561027	-0.21782	0.126365
	1.02835	0.851903	2.59959	2.77898			-0.0538961	-0.0248584	-0.186183	0.157962
	1.03078	0.837753	2.60492	2.72447			-0.0193927	-0.0393394	-0.181962	0.123297
	1.02545	0.80141	2.61006	2.70166			0.00345869	-0.0463178	-0.203085	0.0420641
	1.02482	0.766517	2.58539	2.70275			0.0115581	-0.0558556	-0.212193	-0.0360829
	1.03905	0.758165	2.52568	2.68978			0.00980009	-0.0709541	-0.174075	-0.068081
	1.04786	0.779578	2.46818	2.64608			-0.00465581	-0.0857321	-0.108161	-0.0427252
	1.02991	0.802005	2.46154	2.59934			-0.0225848	-0.0750789	-0.0746382	-0.000654724
	0.986211	0.797138	2.50159	2.57796			-0.0260486	-0.0242697	-0.0998637	0.0103201
	0.934606	0.771294	2.52529	2.5765			-0.0223756	0.0342379	-0.162048	-0.00448913
	0.9074	0.751881	2.48367	2.56778			-0.0223663	0.0559358	-0.220235	-0.00596659
	0.929502	0.752148	2.39206	2.53178			-0.00627202	0.039636	-0.24441	0.0166983
	0.974935	0.760842	2.31877	2.47949			0.0274915	0.0160872	-0.228825	0.0414319
	0.988019	0.754851	2.31867	2.44894			0.0440185	0.0102034	-0.199191	0.050011
	0.958784	0.723368	2.3781	2.46402			0.0354651	0.0303663	-0.181227	0.0419992
	0.927182	0.68477	2.42615	2.49916			0.0236152	0.0520377	-0.165801	0.0319211
	0.924082	0.670244	2.42105	2.5104			0.00946818	0.0346737	-0.135405	0.0405436
	0.953291	0.679297	2.3857	2.48668			-0.00711594	-0.0138992	-0.109819	0.0682261
	0.995989	0.680238	2.36598	2.44598			-0.00524884	-0.0432368	-0.117965	0.0868754
	1.0158	0.655915	2.3721	2.41432			0.00889356	-0.0326588	-0.161818	0.0913338
	0.996707	0.627612	2.37622	2.40564			0.00505756	-0.0064286	-0.214738	0.107545
	0.968444	0.631255	2.35268	2.40535			-0.00822951	0.0125374	-0.246353	0.143065
	0.964488	0.671229	2.31962	2.38956			-0.00272941	0.0164688	-0.240846	0.167351
	0.975088	0.707021	2.31596	2.35893			0.00868099	0.00664456	-0.224298	0.159005
	0.970953	0.696287	2.3457	2.33646			0.0113006	0.00444204	-0.232145	0.11881
	0.940025	0.638284	2.36899	2.3265			0.0190892	0.0228943	-0.257268	0.0666558
	0.884864	0.578482	2.35058	2.32291			0.027131	0.032204	-0.258517	0.0273139
	0.823025	0.563568	2.29731	2.31943			0.00974432	0.00924178	-0.221438	0.0179477
	0.794187	0.588286	2.2495	2.30991			-0.0301654	-0.0181041	-0.175953	0.029213
	0.811722	0.603545	2.23735	2.30423			-0.0673814	-0.0218415	-0.156841	0.0491006
	0.838906	0.583693	2.24302	2.31595			-0.0916808	-0.0107393	-0.173076	0.0794438
	0.846592	0.554368	2.22088	2.33771			-0.0872903	0.00588453	-0.204233	0.118158
	0.850075	0.547769	2.1661	2.34365			-0.0398675	0.0211978	-0.22028	0.147514
	0.869335	0.569943	2.12414	2.31924			0.0257552	0.0153176	-0.212148	0.161406
	0.890871	0.603077	2.13197	2.27193			0.0723768	-0.00373926	-0.203536	0.168953
	0.894955	0.609848	2.17682	2.22297			0.0924736	-0.00409735	-0.21113	0.164642
	0.878819	0.576811	2.20224	2.19281			0.094657	0.00606705	-0.215578	0.139038
	0.854868	0.549766	2.16113	2.1784			0.0791295	-0.0112169	-0.196546	0.111061
	0.843419	0.571778	2.07196	2.16203			0.0566317	-0.0531947	-0.164023	0.10369
	0.856609	0.616611	2.01783	2.13632			0.0450717	-0.0865343	-0.140725	0.114035
	0.883306	0.631815	2.04946	2.11769			0.0415327	-0.089951	-0.149483	0.131865
	0.893672	0.60552	2.13433	2.12163			0.0294009	-0.0571605	-0.194332	0.150809
	0.876934	0.561292	2.19624	2.14261			0.00838189	-0.00798387	-0.24686	0.158994
	0.855265	0.533497	2.18771	2.15305			-0.00541457	0.00940545	-0.260119	0.153347
	0.846287	0.549256	2.11859	2.12426			-0.00804711	-0.0306569	-0.227551	0.148123
	0.844328	0.590142	2.05429	2.0666			-0.0008643	-0.0851193	-0.18628	0.141483
	0.839331	0.599141	2.04756	2.02497			0.012251	-0.0971247	-0.171015	0.121343
	0.826448	0.565541	2.07518	2.02956			0.0227741	-0.0628681	-0.176091	0.0982171
	0.807903	0.537429	2.07805	2.05781			0.0237068	-0.0150942	-0.171315	0.0956129
	0.803025	0.538889	2.04578	2.07232			0.0205514	0.0151859	-0.134077	0.106505
	0.824638	0.54796	2.01392	2.05784			0.0246529	0.0154909	-0.0790122	0.116248
	0.853798	0.541176	2.00722	2.02869			0.0321385	-0.00287299	-0.0478974	0.12494
	0.862846	0.510478	2.0147	2.01645			0.0362919	-0.0136334	-0.072957	0.132921
	0.851668	0.464123	2.00214	2.03116			0.0351938	-0.0144327	-0.133219	0.127586
	0.834652	0.439728	1.95162	2.03927			0.0278573	-0.0296976	-0.183363	0.118934
	0.81775	0.460148	1.90036	2.01617			0.0182707	-0.0629584	-0.211353	0.128679
	0.804362	0.484133	1.90176	1.98358			0.0147601	-0.0867399	-0.231222	0.156408
	0.792297	0.468538	1.94793	1.97267			0.0165081	-0.0791735	-0.243348	0.186816
	0.773938	0.42476	1.97969	1.99214			0.0124539	-0.0483584	-0.241221	0.213053
	0.754278	0.388486	1.96543	2.028			0.00651666	-0.016426	-0.229294	0.219756
	0.746397	0.383446	1.92936	2.043			0.0137653	0.00104195	-0.209041	0.198499
	0.749729	0.409218	1.90859	2.00906			0.0294662	0.0013728	-0.188663	0.173815
	0.753282	0.436824	1.91557	1.95062			0.0383358	-0.00168344	-0.184035	0.171233
	0.755669	0.433897	1.92293	1.91534			0.0394882	0.00439388	-0.194202	0.180834
	0.756359	0.407113	1.89421	1.91408			0.0277116	0.00661402	-0.195	0.186031
	0.750397	0.389144	1.83822	1.92539			-0.00855507	-0.0187076	-0.174695	0.184985
	0.74732	0.394126	1.81349	1.92465			-0.0486646	-0.0603322	-0.145246	0.175788
	0.753725	0.409203	1.85146	1.90215			-0.0601875	-0.0845094	-0.126678	0.156431
	0.75195	0.416658	1.91824	1.87917			-0.0472519	-0.0844643	-0.134539	0.138323
	0.730747	0.40923	1.94468	1.88748			-0.0284211	-0.0728491	-0.170675	0.137422
	0.704214	0.397116	1.89073	1.92149			-0.000819724	-0.0619758	-0.207388	0.152517
	0.684033	0.397863	1.78709	1.94			0.0259932	-0.0634944	-0.216876	0.176369
	0.672592	0.409268	1.7148	1.91836			0.0316601	-0.0752853	-0.205203	0.199189
	0.676154	0.411094	1.71923	1.8706			0.0298657	-0.0712639	-0.205228	0.209542
	0.690304	0.396142	1.76456	1.8335			0.037034	-0.0454826	-0.218843	0.196845
	0.69486	0.381293	1.7839	1.836			0.0286396	-0.0304937	-0.224801	0.176748
	0.690089	0.382308	1.75484	1.8727			-0.000868374	-0.0419635	-0.213418	0.16956
	0.695839	0.392057	1.71688	1.89478			-0.0140874	-0.057721	-0.189105	0.177884
	0.713919	0.391748	1.72241	1.87004			0.000651163	-0.0529096	-0.164461	0.194747
	0.729009	0.372498	1.76531	1.82525			0.0191688	-0.0169416	-0.161361	0.221782
	0.736398	0.352408	1.78162	1.79884			0.0321859	0.0394435	-0.185076	0.250283
	0.737159	0.354109	1.72955	1.79246			0.0398691	0.0729252	-0.210512	0.268475
	0.730805	0.375732	1.64657	1.78638			0.024782	0.0445478	-0.221921	0.277721
	0.725492	0.395892	1.60641	1.76813			-0.00245059	-0.0183749	-0.229112	0.285221
	0.734284	0.390617	1.64077	1.74279			-0.00572461	-0.0549052	-0.236766	0.290612
	0.752071	0.357952	1.70531	1.73743			0.0120553	-0.0536825	-0.239929	0.298
	0.759028	0.330272	1.72681	1.76855			0.0224467	-0.0424454	-0.235916	0.307218
	0.753662	0.332189	1.6877	1.80637			0.0236763	-0.0381086	-0.220885	0.30346
	0.745468	0.348735	1.64367	1.80885			0.0309167	-0.0473138	-0.194842	0.277552
	0.735678	0.353768	1.65457	1.76104			0.0389388	-0.0621405	-0.177111	0.251403
	0.725054	0.337084	1.71063	1.68417			0.0432633	-0.0473144	-0.18609	0.246712
	0.717068	0.303202	1.75089	1.61958			0.0484679	0.00443578	-0.205256	0.25479
	0.707231	0.276823	1.72913	1.59849			0.0422361	0.0413542	-0.202569	0.255596
	0.685759	0.287091	1.66771	1.61423			0.0161084	0.0313339	-0.172687	0.242824
	0.660087	0.318214	1.63338	1.63777			-0.0073457	1.30361e-05	-0.145771	0.218014
	0.648143	0.327613	1.66219	1.656			-0.00114154	-0.0211398	-0.146824	0.192493
	0.651355	0.31001	1.70934	1.66951			0.0269751	-0.0218304	-0.181781	0.190301
	0.659714	0.288998	1.7086	1.67862			0.0540672	0.00272054	-0.226862	0.209936
	0.667758	0.276395	1.65431	1.67357			0.0635624	0.0328011	-0.241126	0.228324
	0.67219	0.276615	1.59996	1.6493			0.0524304	0.0304568	-0.209349	0.243843
	0.666003	0.286116	1.58955	1.62102			0.029746	-0.000370012	-0.163079	0.270167
	0.654001	0.280781	1.61735	1.62313			0.00837308	-0.0253347	-0.13508	0.287457
	0.64581	0.253316	1.63356	1.66668			-0.00876994	-0.0392406	-0.130502	0.275763
	0.632536	0.242255	1.59747	1.70958			-0.0306882	-0.0639443	-0.137588	0.242458
	0.6046	0.272258	1.53447	1.70039			-0.0486334	-0.0977147	-0.146947	0.203229
	0.582267	0.308024	1.50803	1.63112			-0.0409559	-0.124613	-0.155249	0.166824
	0.588861	0.310174	1.5299	1.54133			-0.00477077	-0.141873	-0.171386	0.154976
	0.616849	0.284084	1.555	1.48288			0.0355156	-0.141121	-0.198256	0.174488
	0.644422	0.248526	1.54483	1.48259			0.0517198	-0.118944	-0.214608	0.19814
	0.653733	0.225855	1.50102	1.51984			0.0360672	-0.0963241	-0.197478	0.201046
	0.639493	0.23448	1.4624	1.54916			-0.00242199	-0.0887451	-0.157477	0.191148
	0.620548	0.256407	1.47412	1.55732			-0.036409	-0.0753393	-0.134989	0.175169
	0.618911	0.254506	1.53397	1.56584			-0.0415704	-0.0332759	-0.150243	0.154151
	0.629917	0.233831	1.5844	1.58912			-0.0288578	0.0227371	-0.185102	0.14466
	0.632209	0.229508	1.58525	1.61707			-0.0278601	0.0591739	-0.214227	0.161129
	0.623635	0.243729	1.54964	1.62101			-0.0494021	0.0500055	-0.225492	0.185635
	0.61537	0.255594	1.50974	1.57382			-0.0810713	-0.00421809	-0.219332	0.203165
	0.612701	0.251794	1.47763	1.49325			-0.103215	-0.0679041	-0.216031	0.221021
	0.619775	0.225988	1.44848	1.43797			-0.0960053	-0.0956862	-0.229048	0.235982
	0.631746	0.19032	1.41523	1.43322			-0.0656806	-0.0844311	-0.236739	0.234945
	0.631227	0.171952	1.39405	1.44537			-0.0486905	-0.0763316	-0.214746	0.225607
	0.61595	0.176898	1.41486	1.43713			-0.0601482	-0.0955875	-0.179631	0.221204
	0.605869	0.185118	1.47785	1.40776			-0.0666408	-0.120728	-0.161574	0.220134
	0.607799	0.18648	1.53005	1.38485			-0.0494477	-0.123567	-0.171242	0.231076
	0.606337	0.190293	1.5184	1.39763			-0.0284552	-0.101824	-0.187757	0.259931
	0.594886	0.202763	1.45251	1.43481			-0.014751	-0.0656847	-0.178347	0.289638
	0.57945	0.220735	1.39671	1.44437			-0.00814567	-0.0287938	-0.12365	0.299714
	0.564319	0.241232	1.40458	1.39793			-0.0183683	-0.00175563	-0.054688	0.298016
	0.563324	0.258138	1.47088	1.32795			-0.0327591	0.0261348	-0.0263908	0.293896
	0.584042	0.264599	1.53642	1.28619			-0.0190391	0.0629333	-0.0512615	0.286536
	0.6063	0.265025	1.5488	1.29372			0.00821256	0.0823019	-0.0846388	0.276367
	0.611979	0.26356	1.5136	1.32681			0.00876372	0.0579499	-0.0860049	0.271838
	0.612816	0.256534	1.48464	1.33668			-0.0062939	0.00454646	-0.0660988	0.271241
	0.621076	0.239615	1.50219	1.30173			-0.00303032	-0.0448093	-0.0573444	0.271064
	0.630249	0.215722	1.5522	1.25664			0.0141839	-0.0718424	-0.0775233	0.275999
	0.635418	0.195445	1.57903	1.2505			0.0347039	-0.0690889	-0.116671	0.286807
	0.639061	0.193724	1.5423	1.28404			0.0556392	-0.0491844	-0.132263	0.28729
	0.636388	0.220125	1.45883	1.31969			0.0519485	-0.0421107	-0.0984982	0.273208
	0.627655	0.26099	1.38565	1.33617			0.0160812	-0.0488345	-0.0493535	0.254726
	0.629415	0.286679	1.36562	1.33923			-0.0107707	-0.0388056	-0.0296967	0.237986
	0.644022	0.28489	1.38977	1.35514			-0.00273419	-0.00782059	-0.0389002	0.22023
	0.647297	0.270109	1.41604	1.39259			0.00528359	0.013363	-0.0492664	0.201212
	0.620011	0.262745	1.41887	1.41595			-0.0111489	0.0111581	-0.0433964	0.177664
	0.568908	0.262937	1.42187	1.37791			-0.0299921	-0.00350328	-0.0233601	0.152983
	0.518802	0.258856	1.45102	1.28474			-0.0345495	-0.0189142	-0.0198943	0.144171
	0.49785	0.250458	1.48888	1.19829			-0.0201869	-0.0144849	-0.0570891	0.159883
	0.51836	0.238784	1.49167	1.16626			0.0134575	0.0225001	-0.113924	0.184001
	0.552435	0.222995	1.44082	1.18993			0.0460575	0.0580657	-0.139817	0.193192
	0.559728	0.214078	1.3635	1.22341			0.0452039	0.0479825	-0.125358	0.18613
	0.543754	0.213851	1.31348	1.22279			0.0182608	0.00625512	-0.104942	0.171658
	0.540651	0.204702	1.31941	1.19736			0.00122792	-0.0250708	-0.104313	0.157188
	0.567784	0.183546	1.35603	1.19278			0.00337214	-0.0335938	-0.113202	0.156322
	0.603759	0.170455	1.37894	1.22236			0.00877022	-0.0203456	-0.112234	0.187509
	0.62159	0.172348	1.38028	1.24963			0.0077413	0.00888234	-0.0931658	0.23926
	0.61908	0.186971	1.37698	1.23518			0.00264119	0.0313654	-0.0635722	0.285769
	0.61054	0.22499	1.38102	1.17768			-0.0023372	0.0376259	-0.0468466	0.31155
	0.61373	0.273227	1.38727	1.12475			0.00241237	0.054198	-0.0569546	0.302643
	0.638688	0.290747	1.38524	1.12259			0.0192929	0.0914044	-0.0681242	0.248577
	0.669018	0.267937	1.36864	1.16454			0.0348832	0.114729	-0.0541757	0.179113
	0.67208	0.235448	1.35445	1.20351			0.0383503	0.0986866	-0.0247947	0.133142
	0.641745	0.214008	1.36906	1.21081			0.0353949	0.0547373	-0.00210798	0.118183
	0.604536	0.209346	1.40364	1.19964			0.0410732	0.00875027	-0.000765745	0.126882
	0.581331	0.223597	1.41523	1.19903			0.0509689	-0.0144042	-0.026413	0.159795
	0.57289	0.239938	1.38723	1.22611			0.0490968	-0.0025033	-0.0634622	0.197895
	0.571351	0.234731	1.35003	1.26327			0.0268006	0.0248118	-0.0842598	0.2167
	0.563049	0.216331	1.33733	1.26706			-0.00822385	0.0352346	-0.086454	0.215012
	0.539958	0.206386	1.35797	1.22002			-0.0300896	0.0383132	-0.0915896	0.20394
	0.519713	0.19378	1.38601	1.15482			-0.0193903	0.0633406	-0.107	0.186289
	0.519974	0.166785	1.38361	1.11404			0.0113925	0.101915	-0.112812	0.175858
	0.530076	0.14255	1.34536	1.10631			0.0210512	0.117263	-0.0883607	0.191048
	0.531801	0.133276	1.31451	1.11545			-0.00959153	0.0955461	-0.0400224	0.219981
	0.521302	0.13428	1.3251	1.11942			-0.0577571	0.053048	-0.000759792	0.233327
	0.506102	0.143417	1.36454	1.11112			-0.0880128	0.0140401	0.000981357	0.232008
	0.497969	0.154278	1.39438	1.11645			-0.0803973	-0.001174	-0.0359106	0.235448
	0.506477	0.150054	1.39184	1.15881			-0.0399749	0.00414256	-0.0728508	0.239779
	0.520301	0.134141	1.36419	1.21335			-0.000527788	0.00290035	-0.0734281	0.239119
	0.519199	0.130708	1.33978	1.24172			0.00797348	-0.0188375	-0.0515416	0.237242
	0.510333	0.146773	1.33299	1.2378			-0.000500491	-0.0341404	-0.0561358	0.229655
	0.515855	0.169451	1.32286	1.21535			0.00533762	-0.0143915	-0.0931411	0.212779
	0.532242	0.183379	1.27958	1.19072			0.0232754	0.0231872	-0.125592	0.20704
	0.538529	0.179529	1.21012	1.1688			0.0316253	0.0410631	-0.122797	0.214298
	0.522406	0.164622	1.15376	1.12978			0.0239793	0.0222226	-0.0899361	0.211289
	0.488735	0.158382	1.14449	1.05765			-0.00350188	-0.0260247	-0.0667086	0.193592
	0.462479	0.16758	1.17617	0.983182			-0.0424397	-0.0691098	-0.0882962	0.18134
	0.473559	0.178391	1.21231	0.956149			-0.0532176	-0.065416	-0.136842	0.182058
	0.509566	0.175894	1.21941	0.990315			-0.0232087	-0.0220437	-0.153901	0.193674
	0.519848	0.16417	1.20025	1.06027			0.00256039	0.00942726	-0.114686	0.213964
	0.488194	0.158746	1.18489	1.12363			-0.0013225	0.016908	-0.0633119	0.238323
	0.449376	0.162519	1.19171	1.14908			-0.00890707	0.0307981	-0.0566981	0.255374
	0.432691	0.163825	1.20767	1.14151			-0.00940541	0.0583404	-0.104627	0.264863
	0.441828	0.147711	1.20697	1.12964			-0.0144403	0.0814482	-0.167222	0.266459
	0.46667	0.113749	1.18694	1.11884			-0.0176521	0.0853717	-0.194263	0.249028
	0.482702	0.0853738	1.17723	1.09992			-0.0170506	0.0637657	-0.168817	0.207045
	0.474047	0.0889462	1.20668	1.08273			-0.0270773	0.0300429	-0.12074	0.165048
	0.461981	0.124711	1.26036	1.08949			-0.0257598	0.0228411	-0.0974391	0.148486
	0.473063	0.163733	1.29406	1.12086			0.022154	0.0565183	-0.098735	0.159364
	0.495038	0.182597	1.2801	1.14906			0.0846633	0.0925354	-0.090727	0.187747
	0.497442	0.187328	1.23445	1.139			0.109342	0.100269	-0.0618077	0.218233
	0.476269	0.194268	1.19873	1.06695			0.0960202	0.0922109	-0.034001	0.234644
	0.448711	0.207365	1.20093	0.962463			0.0726325	0.0837364	-0.0275604	0.241122
	0.435239	0.214804	1.22507	0.889608			0.0518552	0.075827	-0.0491787	0.256598
	0.451775	0.200522	1.23682	0.887523			0.0478534	0.0745602	-0.0762458	0.277174
	0.486285	0.160964	1.22983	0.940308			0.0642793	0.0726659	-0.074026	0.285167
	0.501205	0.116962	1.22165	1.00368			0.0681252	0.0475333	-0.0435899	0.275084
	0.479685	0.0973635	1.21991	1.04279			0.0440359	0.00964966	-0.0269546	0.25627
	0.452578	0.0945465	1.22589	1.0548			0.0237382	-0.00967772	-0.0466772	0.238282
	0.45383	0.0768582	1.2286	1.065			0.0291701	-0.0126437	-0.0813342	0.23406
	0.47498	0.0496953	1.21431	1.0828			0.0384283	-0.0149349	-0.099256	0.249629
	0.488188	0.0384267	1.18715	1.09263			0.0262349	-0.00907322	-0.0947816	0.271152
	0.482317	0.0483552	1.1732	1.08426			-0.00728847	0.0122971	-0.0845259	0.276086
	0.468511	0.0777163	1.17932	1.06716			-0.0467302	0.0428035	-0.0928846	0.270437
	0.466554	0.115233	1.18688	1.05989			-0.0672834	0.0865707	-0.123686	0.275918
	0.487424	0.122317	1.17667	1.07447			-0.0558708	0.135319	-0.150205	0.292375
	0.519477	0.0853868	1.14045	1.09627			-0.0332659	0.149099	-0.142865	0.299367
	0.533422	0.049799	1.09173	1.08944			-0.0340896	0.109217	-0.114707	0.29357
	0.518197	0.0512725	1.06774	1.04611			-0.0548101	0.054848	-0.107544	0.278475
	0.495565	0.07496	1.08568	0.99716			-0.0638978	0.0370299	-0.127615	0.268121
	0.488941	0.0970821	1.11208	0.975113			-0.0485436	0.060251	-0.144353	0.28852
	0.49591	0.103295	1.11491	0.987205			-0.0235022	0.101137	-0.137161	0.33813
	0.503848	0.083409	1.10446	1.01579			-0.0136521	0.136172	-0.111181	0.370624
	0.50305	0.0595081	1.10417	1.03625			-0.0243882	0.151629	-0.0935584	0.360298
	0.492297	0.0635879	1.11955	1.04065			-0.0387511	0.157332	-0.113085	0.330472
	0.489815	0.0810979	1.14314	1.04895			-0.0307889	0.171302	-0.158307	0.306684
	0.514698	0.0753242	1.15046	1.0693			-0.00101383	0.182042	-0.184116	0.296722
	0.551036	0.0492727	1.12294	1.07807			0.0159423	0.156228	-0.167537	0.303438
	0.559808	0.0322715	1.08262	1.05931			-0.000449896	0.0994892	-0.136404	0.317399
	0.531584	0.0284314	1.07029	1.03084			-0.0289444	0.053783	-0.124224	0.320813
	0.489238	0.0294726	1.08724	1.01906			-0.0333226	0.0455136	-0.141912	0.320577
	0.455719	0.0342516	1.10533	1.03219			-0.0041594	0.0680291	-0.173537	0.335887
	0.442302	0.0344089	1.10119	1.05812			0.0335624	0.0946671	-0.195065	0.357097
	0.440353	0.0317988	1.07308	1.06797			0.042015	0.0946417	-0.188508	0.358475
	0.430841	0.0443644	1.04056	1.04478			0.00418452	0.0582455	-0.163464	0.341546
	0.416582	0.0697239	1.0289	1.00802			-0.0477317	0.0178082	-0.14861	0.320283
	0.420526	0.082911	1.03128	0.981805			-0.0640033	0.0133781	-0.150421	0.302392
	0.445248	0.0743184	1.02278	0.965374			-0.0456863	0.0432258	-0.146365	0.303816
	0.46598	0.0562422	1.00111	0.953783			-0.0361502	0.0702425	-0.126722	0.336038
	0.466954	0.0424653	0.988992	0.949067			-0.0521246	0.0714959	-0.104979	0.370495
	0.448466	0.0429744	0.993494	0.942118			-0.0777601	0.0582893	-0.0944986	0.3783
	0.418978	0.0553461	0.998779	0.925237			-0.0929724	0.0497664	-0.104981	0.366954
	0.401312	0.061984	0.984197	0.901207			-0.0771203	0.0577781	-0.133038	0.355636
	0.410183	0.0559514	0.946725	0.874104			-0.0281937	0.0684525	-0.148551	0.34803
	0.42583	0.052834	0.913391	0.847493			0.0140904	0.0446456	-0.138017	0.35074
	0.428235	0.0674652	0.919467	0.829377			0.0178473	-0.0169127	-0.124669	0.363479
	0.426284	0.0969257	0.971415	0.820679			0.00800577	-0.0621369	-0.127061	0.374493
	0.429654	0.122494	1.03327	0.817597			0.011566	-0.0495046	-0.13572	0.378536
	0.429886	0.123939	1.05873	0.825006			0.0156061	0.00167883	-0.130057	0.384097
	0.420162	0.102826	1.03359	0.841447			0.0100313	0.0539803	-0.104952	0.391235
	0.397536	0.0839869	0.991237	0.855548			-0.001158	0.0851266	-0.0727977	0.388278
	0.357892	0.0918573	0.980123	0.867081			-0.0305736	0.0898668	-0.0624649	0.37497
	0.319495	0.120232	1.01009	0.887818			-0.0725714	0.0888947	-0.0878459	0.364604
	0.318077	0.135157	1.04385	0.904318			-0.0842139	0.0995757	-0.128627	0.365392
	0.356306	0.113962	1.04335	0.896001			-0.0526518	0.0999717	-0.146243	0.372293
	0.396454	0.0685948	1.00988	0.870932			-0.0235697	0.068158	-0.132567	0.37475
	0.411418	0.0319197	0.979457	0.861465			-0.0210511	0.0315201	-0.119482	0.354803
	0.406978	0.0191307	0.982872	0.887744			-0.0210841	0.027376	-0.132412	0.303509
	0.39946	0.0142934	1.0156	0.938084			-0.0117783	0.0537817	-0.162906	0.246015
	0.399634	-0.00229255	1.03796	0.981022			0.00550614	0.0914629	-0.189018	0.218405
	0.410552	-0.0305999	1.02521	0.990905			0.0330395	0.119568	-0.190907	0.22419
	0.417163	-0.0503999	0.986848	0.983304			0.0500776	0.109581	-0.173602	0.250813
	0.402632	-0.0371368	0.948824	0.989662			0.0289601	0.066725	-0.172069	0.289682
	0.383483	0.000103478	0.923264	1.00778			-0.0138391	0.046343	-0.204972	0.328829
	0.38787	0.0171641	0.908037	1.01011			-0.0382866	0.0713177	-0.23958	0.355266
	0.408274	-0.00795151	0.892517	0.979678			-0.0453531	0.0958289	-0.244315	0.370014
	0.408405	-0.0438731	0.878723	0.92226			-0.0516937	0.0865721	-0.22259	0.371385
	0.366892	-0.0511505	0.885403	0.858718			-0.052814	0.0549927	-0.197711	0.352355
	0.302338	-0.015985	0.914905	0.819196			-0.0429638	0.0199293	-0.185502	0.32078
	0.256442	0.0510923	0.936755	0.813681			-0.0249753	0.00497859	-0.180443	0.304551
	0.261643	0.103237	0.927491	0.830209			0.00304939	0.0264945	-0.160417	0.311492
	0.31007	0.0964457	0.900827	0.850763			0.032533	0.0594559	-0.112399	0.330807
	0.360722	0.0579025	0.886958	0.854943			0.0372236	0.0672677	-0.0628368	0.355617
	0.383556	0.0460103	0.904793	0.834548			0.0136523	0.0590276	-0.0589281	0.383557
	0.388092	0.0646536	0.943846	0.804727			-0.011106	0.059524	-0.112396	0.402214
	0.397442	0.0825081	0.963232	0.790078			-0.015127	0.0670349	-0.177887	0.411711
	0.411454	0.0871927	0.928159	0.791871			-0.00739368	0.0720246	-0.206571	0.424585
	0.417205	0.0779771	0.859837	0.802823			-0.00450663	0.0745252	-0.189032	0.42823
	0.41063	0.0596801	0.811884	0.816368			-0.0114306	0.0722839	-0.146876	0.403149
	0.393204	0.0506393	0.808983	0.822867			-0.022767	0.0638969	-0.107806	0.364942
	0.369929	0.0547602	0.836171	0.818824			-0.0221951	0.0654065	-0.0875729	0.337735
	0.355095	0.0469201	0.865736	0.803953			-0.00410284	0.0828164	-0.0687545	0.327382
	0.351695	0.0264838	0.870684	0.773337			0.0135524	0.0887974	-0.04179	0.342142
	0.344144	0.0274953	0.85479	0.725961			0.00880393	0.0683041	-0.0297665	0.382339
	0.329727	0.0550221	0.848357	0.684091			-0.0138565	0.0440827	-0.0505395	0.419673
	0.322354	0.0820196	0.863489	0.670961			-0.0297354	0.0380435	-0.0877675	0.432479
	0.329873	0.0903292	0.869708	0.680844			-0.0307186	0.0437785	-0.118856	0.433595
	0.347299	0.0795982	0.849379	0.699743			-0.0266469	0.0511477	-0.135707	0.435646
	0.36428	0.0572647	0.817621	0.720117			-0.032886	0.0557553	-0.143382	0.434864
	0.367896	0.0502072	0.798559	0.736091			-0.0548929	0.0535393	-0.153912	0.432027
	0.354469	0.0760995	0.803306	0.750337			-0.0744066	0.0495731	-0.176532	0.43595
	0.344585	0.10003	0.820353	0.773414			-0.0635212	0.0450761	-0.200469	0.44088
	0.354764	0.0826751	0.822072	0.796347			-0.0284962	0.0263461	-0.198783	0.447265
	0.373219	0.0368388	0.80357	0.802739			-0.00821821	-0.0173078	-0.163359	0.47086
	0.383414	0.00225021	0.795597	0.798394			-0.0188497	-0.0662864	-0.133449	0.512433
	0.384271	0.00532298	0.821774	0.797964			-0.0367908	-0.089591	-0.148618	0.540089
	0.381095	0.0425569	0.869086	0.803818			-0.0411435	-0.0796063	-0.198949	0.537645
	0.381098	0.0773322	0.904695	0.815421			-0.0314951	-0.0515723	-0.244163	0.510714
	0.389478	0.0757049	0.905848	0.823645			-0.0106053	-0.0191178	-0.251221	0.463704
	0.393625	0.0500709	0.87917	0.805445			-0.000984067	0.00667081	-0.214402	0.40795
	0.373544	0.0388677	0.858017	0.759976			-0.0281296	0.0143203	-0.164978	0.366587
	0.340475	0.0535215	0.867486	0.712335			-0.0692251	0.0114042	-0.141437	0.343004
	0.326293	0.0680231	0.891695	0.679527			-0.0799526	0.00977239	-0.133645	0.329088
	0.340751	0.0537987	0.891859	0.661774			-0.0643245	-0.00425684	-0.121566	0.333648
	0.371436	0.00899929	0.853821	0.659648			-0.0530597	-0.0365794	-0.118028	0.362881
	0.399414	-0.0360094	0.802835	0.663346			-0.0519041	-0.0631525	-0.141865	0.397681
	0.404351	-0.0464099	0.771662	0.663548			-0.0610804	-0.0665704	-0.186662	0.41151
	0.386315	-0.0217713	0.766465	0.663582			-0.0854894	-0.0461213	-0.236276	0.397283
	0.377029	0.00958661	0.767265	0.661279			-0.0981276	-0.0020098	-0.274131	0.374948
	0.397967	0.0232667	0.753482	0.648443			-0.074911	0.0489721	-0.286499	0.375226
	0.431498	0.0247271	0.732749	0.635682			-0.0472911	0.0776551	-0.27533	0.412243
	0.454777	0.0346354	0.728274	0.646538			-0.0441937	0.0842958	-0.257252	0.463425
	0.468995	0.056608	0.753035	0.679209			-0.043084	0.0865937	-0.232771	0.486368
	0.474556	0.0734512	0.788304	0.720171			-0.024078	0.0820058	-0.194677	0.468496
	0.458284	0.0650805	0.80377	0.762091			0.00108906	0.0642874	-0.153927	0.439382
	0.418452	0.02984	0.785309	0.790505			0.0241804	0.0478365	-0.138035	0.427335
	0.366779	-0.0081396	0.757384	0.795362			0.04401	0.0432429	-0.154645	0.428842
	0.317594	-0.0201742	0.755101	0.7818			0.0389544	0.0429581	-0.195915	0.432067
	0.289457	-0.00287844	0.784928	0.763981			0.0146722	0.0482465	-0.248165	0.42547
	0.297973	0.0130657	0.821685	0.747501			0.0104956	0.0652131	-0.283961	0.401454
	0.332345	0.00230867	0.840413	0.73687			0.0294076	0.0745855	-0.27793	0.367136
	0.359939	-0.0171601	0.843261	0.728775			0.0386206	0.0598395	-0.240996	0.344262
	0.370386	-0.0173776	0.855176	0.712951			0.0283478	0.0394191	-0.203602	0.336768
	0.373755	-0.000164254	0.88741	0.694683			0.0169039	0.0250057	-0.177501	0.338421
	0.373509	0.0166561	0.914638	0.689563			0.0117118	0.000854551	-0.164268	0.350723
	0.366757	0.0194121	0.901864	0.700696			0.0140173	-0.0300706	-0.158514	0.374587
	0.353286	-0.00125087	0.851603	0.714197			0.0227223	-0.0507331	-0.15376	0.400537
	0.333285	-0.0310691	0.796723	0.720438			0.0226491	-0.0584409	-0.16086	0.424778
	0.307571	-0.0372232	0.761163	0.71419			0.00504999	-0.0443424	-0.200324	0.44872
	0.290439	-0.0195135	0.74652	0.69939			-0.0101164	0.000457518	-0.261923	0.45991
	0.297317	-0.00879595	0.735965	0.682672			-0.00249585	0.046184	-0.306264	0.447033
	0.318597	-0.00633579	0.71501	0.663901			0.0174373	0.0528224	-0.314547	0.426095
	0.328539	0.0076297	0.695785	0.64823			0.0301804	0.0298928	-0.307892	0.411967
	0.316902	0.0269891	0.709446	0.651581			0.0327893	0.0107885	-0.303775	0.396775
	0.291674	0.0409288	0.754656	0.679723			0.035424	-0.000906235	-0.293708	0.381842
	0.263531	0.0528012	0.797473	0.712321			0.0442224	-0.0142019	-0.260561	0.384126
	0.246654	0.0546071	0.805697	0.726725			0.054452	-0.0257235	-0.205867	0.400126
	0.250168	0.0406987	0.779174	0.716549			0.0531009	-0.0320643	-0.151468	0.414992
	0.262336	0.0314304	0.744525	0.695291			0.0234455	-0.0353163	-0.133218	0.430621
	0.266584	0.0410008	0.742902	0.69459			-0.0244888	-0.0243218	-0.167859	0.442573
	0.268971	0.0463178	0.784169	0.727969			-0.060157	0.00397106	-0.22204	0.440658
	0.282547	0.0278187	0.830008	0.769004			-0.0639361	0.0213868	-0.246903	0.437536
	0.303223	-0.00332827	0.841119	0.780282			-0.0424793	0.0118172	-0.232814	0.448406
	0.323222	-0.0317284	0.822657	0.751448			-0.018645	-0.00858103	-0.197992	0.455071
	0.333619	-0.0415335	0.800334	0.698117			-0.0134724	-0.0274677	-0.164306	0.443406
	0.326832	-0.02356	0.786826	0.644506			-0.0327435	-0.0478098	-0.140256	0.42409
	0.310021	-0.000202721	0.7746	0.613925			-0.0563645	-0.0619894	-0.119613	0.406132
	0.299192	-0.00869374	0.751478	0.605752			-0.0615224	-0.0644195	-0.0936983	0.385035
	0.297161	-0.0490525	0.718706	0.596815			-0.0549685	-0.061932	-0.0761285	0.369336
	0.296973	-0.0847883	0.697186	0.576679			-0.0558949	-0.0510705	-0.0936812	0.369703
	0.300675	-0.0953747	0.702238	0.562729			-0.0600387	-0.0270567	-0.148853	0.372325
	0.30645	-0.0833563	0.717088	0.563792			-0.0552693	-0.00630404	-0.209564	0.368183
	0.301452	-0.0599136	0.71346	0.570807			-0.0451749	-0.0115384	-0.239471	0.374357
	0.284418	-0.0425512	0.688165	0.571216			-0.0366916	-0.0389294	-0.235656	0.388918
	0.264513	-0.0339849	0.664401	0.553858			-0.0328823	-0.063679	-0.209928	0.386106
	0.246375	-0.0127233	0.666013	0.522534			-0.0448108	-0.0683337	-0.176559	0.364685
	0.237434	0.0306507	0.693861	0.507118			-0.0686236	-0.0486727	-0.156152	0.344648
	0.248173	0.0746815	0.726784	0.528419			-0.0748303	-0.0175127	-0.164148	0.334301
	0.269619	0.0941748	0.740392	0.569259			-0.0636415	0.0015419	-0.190152	0.33911
	0.28347	0.0813685	0.727543	0.603313			-0.0670392	-0.000472291	-0.220237	0.359211
	0.292729	0.0491673	0.701268	0.620298			-0.0802231	-0.0021698	-0.251984	0.372844
	0.307919	0.0166166	0.666672	0.621637			-0.0744579	0.0109743	-0.275317	0.362526
	0.321612	-0.00721389	0.621093	0.617447			-0.0550212	0.0214946	-0.279455	0.339033
	0.328014	-0.0267327	0.565684	0.611484			-0.0376421	0.0215513	-0.271172	0.316804
	0.331961	-0.0436939	0.516931	0.586237			-0.018721	0.0198601	-0.254397	0.301179
	0.32699	-0.0472422	0.499157	0.539383			-0.0114805	0.00995442	-0.230865	0.303262
	0.306679	-0.029105	0.531617	0.509094			-0.0348213	-0.0108601	-0.204775	0.330817
	0.286212	0.000979158	0.603211	0.526569			-0.0664602	-0.0186982	-0.181406	0.370734
	0.278064	0.0200613	0.670157	0.578577			-0.0756395	-0.00200767	-0.156506	0.396137
	0.275662	0.0143441	0.688073	0.621199			-0.0791839	0.0193242	-0.137523	0.398275
	0.275749	-0.00801925	0.66002	0.619632			-0.0901615	0.0285944	-0.144136	0.387808
	0.281849	-0.0291545	0.639665	0.573468			-0.0879496	0.0230443	-0.174857	0.37736
	0.283109	-0.0329371	0.674193	0.529675			-0.0704286	0.00327489	-0.197862	0.372633
	0.266598	-0.0148393	0.744742	0.532042			-0.0545554	-0.0124993	-0.187193	0.372752
	0.247652	0.00649518	0.78889	0.561232			-0.0370832	0.000574372	-0.14963	0.361399
	0.245546	0.0106332	0.769256	0.5732			-0.0155787	0.034965	-0.10359	0.331549
	0.257896	0.00122375	0.707349	0.559782			-0.0198942	0.0596149	-0.0729906	0.303438
	0.275635	-0.00440838	0.649315	0.553983			-0.0538221	0.0675314	-0.0766952	0.295786
	0.296473	-0.0036114	0.622891	0.580949			-0.0767583	0.064567	-0.0997356	0.304285
	0.314678	-0.00487403	0.613042	0.629435			-0.0713464	0.0373659	-0.110809	0.323465
	0.319155	-0.00874303	0.589209	0.652846			-0.0547463	-0.0150053	-0.112215	0.350595
	0.312209	-0.0191572	0.55293	0.619259			-0.0413407	-0.0611627	-0.119224	0.374621
	0.302469	-0.0404287	0.534237	0.5587			-0.0385821	-0.0842595	-0.125454	0.387627
	0.289099	-0.0548363	0.54922	0.528505			-0.0495995	-0.0934326	-0.12681	0.394688
	0.273285	-0.0506133	0.582463	0.54852			-0.0563724	-0.0829255	-0.13224	0.394292
	0.262269	-0.0498234	0.60982	0.588031			-0.0418925	-0.0525046	-0.141599	0.374638
	0.256877	-0.0685169	0.613889	0.602992			-0.0223425	-0.0327691	-0.154296	0.337678
	0.250812	-0.0892012	0.606186	0.579587			-0.0211336	-0.0364505	-0.170307	0.301946
	0.247693	-0.100541	0.614564	0.551479			-0.0330203	-0.0463614	-0.176469	0.273119
	0.256034	-0.108687	0.641275	0.558246			-0.0360002	-0.0528946	-0.154153	0.244943
	0.266714	-0.110988	0.650033	0.586043			-0.0275612	-0.0565179	-0.109922	0.225721
	0.262278	-0.110174	0.629555	0.589546			-0.0145847	-0.0489616	-0.0670742	0.222146
	0.24186	-0.122465	0.611786	0.543746			-0.00555436	-0.0311804	-0.0382718	0.224441
	0.213093	-0.134448	0.626771	0.472402			-0.00671273	-0.0249369	-0.0166319	0.2362
	0.184749	-0.119462	0.669102	0.431646			-0.0180755	-0.0358937	0.00154242	0.264186
	0.179129	-0.0933014	0.706535	0.459229			-0.0327608	-0.0492238	0.0124488	0.281778
	0.208908	-0.0826026	0.699807	0.524431			-0.045608	-0.0609952	0.00693809	0.268673
	0.251173	-0.0818455	0.648579	0.557355			-0.0623901	-0.0849412	-0.0266015	0.2429
	0.279541	-0.0796795	0.607169	0.5423			-0.0764909	-0.116026	-0.0872083	0.221899
	0.294449	-0.0814565	0.621999	0.526766			-0.0740006	-0.133936	-0.142567	0.203664
	0.302052	-0.0839527	0.669158	0.549428			-0.0560238	-0.133704	-0.163743	0.197337
	0.294731	-0.0786701	0.691506	0.591918			-0.034741	-0.115556	-0.16075	0.207409
	0.271759	-0.0788868	0.661653	0.601462			-0.0239346	-0.0812832	-0.155283	0.214425
	0.242508	-0.0915761	0.600064	0.548129			-0.0326319	-0.0519127	-0.157683	0.216462
	0.217892	-0.101307	0.556036	0.472822			-0.0547796	-0.0436958	-0.171946	0.239587
	0.214394	-0.102331	0.561187	0.455709			-0.0661024	-0.0389932	-0.198902	0.283509
	0.238069	-0.098179	0.590864	0.521265			-0.0535057	-0.0201173	-0.224384	0.313872
	0.270273	-0.0839593	0.594947	0.606274			-0.036693	0.0022215	-0.234755	0.310437
	0.285016	-0.0616816	0.566571	0.638778			-0.0379578	0.0194828	-0.226478	0.283693
	0.275344	-0.0512567	0.547101	0.604639			-0.0535343	0.0323887	-0.202816	0.250319
	0.249148	-0.058102	0.571279	0.538166			-0.0719851	0.0355499	-0.170055	0.23683
	0.217973	-0.0635943	0.6269	0.489153			-0.0896066	0.0255157	-0.142912	0.259563
	0.199577	-0.0529572	0.668648	0.482549			-0.0956247	0.0155358	-0.135085	0.286046
	0.198504	-0.030522	0.658086	0.492666			-0.0856284	0.0192737	-0.139201	0.271143
	0.197188	-0.0100607	0.611105	0.4893			-0.078703	0.0285863	-0.137019	0.224186
	0.192332	-0.003036	0.579133	0.483253			-0.0839067	0.034574	-0.127692	0.185158
	0.202364	-0.00433934	0.588328	0.498449			-0.0788572	0.0419942	-0.113279	0.172095
	0.228043	0.00124947	0.612584	0.531311			-0.0609734	0.0495407	-0.0943593	0.19152
	0.248731	0.0154601	0.612255	0.561073			-0.0518332	0.051984	-0.0801557	0.237609
	0.254321	0.0266741	0.577479	0.563373			-0.0445124	0.056576	-0.0871771	0.283669
	0.248069	0.0227025	0.542052	0.535668			-0.0244364	0.0626378	-0.110557	0.312393
	0.233112	0.000449932	0.546268	0.517777			-0.0118914	0.0524971	-0.134459	0.332775
	0.222533	-0.0300824	0.587328	0.545127			-0.016155	0.0307059	-0.146575	0.343937
	0.229619	-0.0554486	0.621983	0.588318			-0.0180384	0.0157541	-0.135392	0.332962
	0.243963	-0.0661402	0.616361	0.592883			-0.0212962	0.000721264	-0.104846	0.304759
	0.250186	-0.0602479	0.573027	0.549548			-0.0415738	-0.0205029	-0.0777655	0.282131
	0.252535	-0.046709	0.528551	0.491458			-0.0590209	-0.0335996	-0.0726243	0.279418
	0.252298	-0.0383679	0.515168	0.467481			-0.0517676	-0.0357727	-0.0886351	0.290783
	0.239128	-0.0406558	0.529428	0.494703			-0.0421909	-0.0345508	-0.118994	0.296431
	0.219645	-0.0521297	0.537232	0.537506			-0.0470956	-0.0204492	-0.153376	0.279689
	0.215493	-0.0759772	0.525989	0.543218			-0.0536789	0.00898417	-0.171465	0.245633
	0.229041	-0.107519	0.512903	0.513191			-0.0633838	0.0306304	-0.156082	0.229185
	0.241522	-0.127524	0.516087	0.495989			-0.0784788	0.0326246	-0.116647	0.257971
	0.244537	-0.125494	0.533604	0.514784			-0.0730573	0.0285942	-0.0800726	0.307694
	0.236385	-0.106372	0.543525	0.546879			-0.0349014	0.0231419	-0.0647569	0.327358
	0.214102	-0.0748324	0.528129	0.54968			0.00285482	0.00544468	-0.0778314	0.301096
	0.190392	-0.0413184	0.495439	0.505543			0.0181895	-0.0209051	-0.115778	0.255265
	0.184023	-0.0229743	0.477069	0.451561			0.0262519	-0.050157	-0.149282	0.231136
	0.193273	-0.0222948	0.480424	0.449549			0.0320966	-0.0941882	-0.153582	0.252823
	0.200091	-0.023664	0.483197	0.510668			0.0324517	-0.147297	-0.140184	0.30198
	0.20076	-0.0303658	0.470477	0.57593			0.0333548	-0.184282	-0.136595	0.328395
	0.201713	-0.0591951	0.450281	0.587801			0.0307118	-0.203637	-0.147729	0.309853
	0.199717	-0.0988151	0.434279	0.54176			0.00603916	-0.218664	-0.167598	0.278018
	0.193905	-0.12879	0.43405	0.487466			-0.0343882	-0.220323	-0.18284	0.269364
	0.19196	-0.151873	0.451012	0.478245			-0.0657909	-0.207372	-0.179425	0.283697
	0.193414	-0.16515	0.467691	0.512298			-0.0759627	-0.19988	-0.165996	0.298063
	0.187824	-0.159842	0.467578	0.534749			-0.0669623	-0.192978	-0.165911	0.292509
	0.174212	-0.155664	0.467447	0.513248			-0.0446478	-0.169988	-0.178708	0.25713
	0.163562	-0.164621	0.48487	0.479299			-0.0187303	-0.143006	-0.18714	0.21057
	0.163455	-0.157521	0.510898	0.478374			-0.0037171	-0.13337	-0.184883	0.191802
	0.175694	-0.11921	0.528972	0.521787			0.000654614	-0.136405	-0.182751	0.204854
	0.198369	-0.0768001	0.535183	0.567414			0.00289727	-0.137255	-0.188527	0.214045
	0.21713	-0.051336	0.528251	0.557495			0.00151969	-0.13478	-0.199442	0.208418
	0.214681	-0.0481041	0.517852	0.488444			-0.00734632	-0.130313	-0.212407	0.206562
	0.197761	-0.0737206	0.514656	0.4249			-0.0191973	-0.124887	-0.221852	0.211563
	0.184042	-0.10708	0.508287	0.418052			-0.023209	-0.126537	-0.220865	0.218173
	0.172772	-0.109855	0.488751	0.450425			-0.0162857	-0.134982	-0.210098	0.225246
	0.157993	-0.081496	0.476851	0.476328			0.00197092	-0.134795	-0.192389	0.218424
	0.144093	-0.0526072	0.490671	0.471466			0.025355	-0.12511	-0.160588	0.198212
	0.13764	-0.0403579	0.508123	0.4437			0.0387628	-0.130074	-0.122583	0.198759
	0.141597	-0.042552	0.499114	0.427765			0.0414233	-0.150873	-0.108327	0.231034
	0.161582	-0.0575868	0.457195	0.446071			0.0461233	-0.162221	-0.129339	0.249143
	0.189453	-0.0743649	0.398623	0.473792			0.0521971	-0.154395	-0.16593	0.21895
	0.203197	-0.0785809	0.353529	0.471405			0.0466867	-0.135859	-0.197421	0.16527
	0.198735	-0.0789176	0.354378	0.442843			0.0329484	-0.112798	-0.208353	0.131008
	0.189782	-0.0882783	0.396166	0.424174			0.0235942	-0.0940944	-0.187601	0.137907
	0.185667	-0.0959589	0.442221	0.43931			0.0218038	-0.0838534	-0.143477	0.181262
	0.1905	-0.0880197	0.4637	0.475963			0.0251008	-0.0682302	-0.10689	0.225587
	0.20226	-0.0700144	0.457301	0.491647			0.0311242	-0.0396301	-0.0953659	0.230379
	0.206474	-0.0543917	0.43574	0.45747			0.0250586	-0.0122403	-0.1017	0.2069
	0.195047	-0.0513437	0.417374	0.410859			-0.000506008	-0.000444835	-0.11041	0.201236
	0.183695	-0.0664326	0.406256	0.41386			-0.0193895	-0.00388755	-0.122083	0.218623
	0.18583	-0.0917684	0.387895	0.467881			-0.0121156	-0.0193732	-0.137561	0.226481
	0.192031	-0.116339	0.361566	0.51784			-9.93092e-05	-0.0506025	-0.157959	0.212329
	0.195748	-0.139198	0.355648	0.5166			0.00101687	-0.0922272	-0.183222	0.188436
	0.199713	-0.159185	0.388962	0.468912			0.00614709	-0.127207	-0.198238	0.175273
	0.198006	-0.169037	0.445505	0.429133			0.0137744	-0.150483	-0.191143	0.191827
	0.187527	-0.165174	0.485794	0.448354			0.00470856	-0.163736	-0.183437	0.220287
	0.178474	-0.144806	0.488243	0.500722			-0.0123246	-0.156934	-0.20206	0.210675
	0.173994	-0.112409	0.467882	0.514079			-0.0254563	-0.127685	-0.235189	0.145154
	0.165532	-0.0896886	0.460817	0.464281			-0.0457697	-0.0971745	-0.257568	0.0611545
	0.1569	-0.0951466	0.478421	0.399542			-0.0590302	-0.0761471	-0.258881	0.00616453
	0.160008	-0.128134	0.501032	0.378177			-0.0369016	-0.0646789	-0.239141	-0.00317396
	0.172799	-0.167522	0.507109	0.414057			-0.000120926	-0.0690993	-0.216154	0.0186837
	0.190001	-0.185106	0.494927	0.463752			0.0154509	-0.0787339	-0.21518	0.0407334
	0.216318	-0.174052	0.477125	0.468827			0.0168682	-0.0702561	-0.225776	0.0427762
	0.244144	-0.156806	0.462506	0.43286			0.0215129	-0.0543109	-0.213907	0.035156
	0.251276	-0.148846	0.443795	0.415712			0.0197424	-0.0569571	-0.172359	0.0479797
	0.235189	-0.141518	0.407083	0.447543			0.0112258	-0.0686788	-0.1316	0.0866818
	0.216468	-0.124727	0.365439	0.489205			0.0141648	-0.0692792	-0.120604	0.120827
	0.208048	-0.0985919	0.352248	0.483122			0.0196887	-0.0615871	-0.146077	0.125885
	0.206123	-0.0687004	0.384838	0.420212			0.0148092	-0.0505506	-0.187076	0.114304
	0.209749	-0.0504907	0.446663	0.345535			0.013859	-0.0401524	-0.218333	0.111751
	0.21717	-0.0516042	0.498208	0.321421			0.0258449	-0.0526276	-0.23539	0.135422
	0.219095	-0.0553551	0.504271	0.356095			0.0306806	-0.10123	-0.259032	0.181768
	0.214577	-0.0517443	0.47216	0.397335			0.0198323	-0.155334	-0.29753	0.222926
	0.208052	-0.0532781	0.441801	0.398729			0.00497538	-0.183301	-0.32116	0.239328
	0.19642	-0.0661886	0.43631	0.373503			-0.0160847	-0.193464	-0.304192	0.245054
	0.179919	-0.0790826	0.439422	0.366544			-0.0429442	-0.197024	-0.265683	0.259027
	0.174481	-0.0882667	0.436712	0.396224			-0.0563466	-0.189196	-0.240485	0.274442
	0.190742	-0.0974483	0.430592	0.436687			-0.0497921	-0.174768	-0.240375	0.280184
	0.212123	-0.10203	0.431823	0.439636			-0.0401844	-0.154037	-0.253396	0.282459
	0.221571	-0.11382	0.442948	0.394272			-0.0345603	-0.109526	-0.251627	0.290104
	0.223153	-0.154893	0.450493	0.345195			-0.0289664	-0.0546319	-0.214044	0.30493
	0.221152	-0.201596	0.428687	0.342973			-0.0261204	-0.0288071	-0.165656	0.326227
	0.207222	-0.208629	0.384311	0.387475			-0.0250022	-0.0258005	-0.151128	0.338416
	0.182751	-0.184092	0.362232	0.434067			-0.0209299	-0.00968237	-0.179579	0.313165
	0.162604	-0.165391	0.389965	0.440154			-0.0145724	0.0241156	-0.221101	0.255024
	0.152745	-0.161207	0.445826	0.404673			-0.0179071	0.0593913	-0.24412	0.210568
	0.153046	-0.165338	0.493445	0.376331			-0.0340879	0.0839797	-0.244698	0.204786
	0.163184	-0.16914	0.511088	0.393825			-0.0514914	0.0889393	-0.239027	0.216624
	0.173692	-0.153577	0.493448	0.428938			-0.0610478	0.0720232	-0.240115	0.222724
	0.172408	-0.121081	0.466354	0.434134			-0.0545056	0.046474	-0.242863	0.213419
	0.165806	-0.112689	0.462747	0.404233			-0.030491	0.0192862	-0.231485	0.183026
	0.162283	-0.14134	0.477712	0.375244			-4.26391e-05	-0.0179428	-0.199116	0.150928
	0.159032	-0.172342	0.479481	0.38012			0.0176427	-0.0631688	-0.171458	0.144561
	0.159421	-0.180794	0.456832	0.421891			0.0156675	-0.0912091	-0.181785	0.152394
	0.16819	-0.170216	0.427088	0.460436			-0.00280455	-0.0876014	-0.221688	0.149527
	0.176729	-0.152083	0.41722	0.453575			-0.0354266	-0.0675314	-0.247599	0.143921
	0.17481	-0.140449	0.43838	0.414138			-0.0718924	-0.0457718	-0.236445	0.159764
	0.166357	-0.1434	0.465497	0.389369			-0.0942388	-0.0302571	-0.195678	0.198139
	0.158537	-0.1448	0.458461	0.394076			-0.0952441	-0.0352312	-0.156207	0.24541
	0.15577	-0.124482	0.417435	0.404061			-0.0752301	-0.0573081	-0.147705	0.280097
	0.170551	-0.0950059	0.379924	0.392542			-0.0359821	-0.0674822	-0.166775	0.27609
	0.204858	-0.0794889	0.370343	0.353316			0.00517257	-0.0526438	-0.177027	0.235989
	0.23843	-0.0775178	0.378436	0.316746			0.0242597	-0.0293579	-0.163828	0.195993
	0.254086	-0.0760233	0.386058	0.322156			0.0218847	-0.0117143	-0.151651	0.175989
	0.250231	-0.0632685	0.388139	0.362936			0.0174037	-0.00277597	-0.159514	0.159356
	0.226241	-0.0342102	0.396143	0.386482			0.00976459	-0.00325504	-0.174763	0.140769
	0.186175	-0.00600506	0.416829	0.366989			-0.0134841	-0.00716936	-0.171216	0.131515
	0.147409	-0.00527261	0.442779	0.329084			-0.0356945	-0.00926249	-0.138945	0.130914
	0.119347	-0.0344931	0.455263	0.314888			-0.0391538	-0.0111502	-0.0937979	0.136079
	0.0984022	-0.0712925	0.448527	0.346858			-0.0341717	-0.0140679	-0.0738858	0.154471
	0.0927681	-0.0919814	0.437318	0.396957			-0.0241336	-0.00700638	-0.112239	0.179974
	0.110741	-0.0882962	0.439351	0.402442			-0.00273428	0.0148256	-0.186344	0.196153
	0.133782	-0.0708545	0.45041	0.342048			0.00829786	0.0310082	-0.236512	0.20365
	0.143851	-0.0617595	0.446268	0.26708			-0.00982032	0.0244821	-0.241037	0.209649
	0.148102	-0.0685835	0.411568	0.232138			-0.0317779	0.00738881	-0.227452	0.218505
	0.154829	-0.080147	0.366362	0.239131			-0.0396287	-0.00109007	-0.223235	0.240505
	0.163407	-0.086754	0.351003	0.251112			-0.0530305	0.00831808	-0.231519	0.280496
	0.180693	-0.0898048	0.377257	0.233914			-0.0707688	0.0416987	-0.238124	0.317177
	0.207737	-0.10086	0.409122	0.196728			-0.0645155	0.0819216	-0.219395	0.323913
	0.224036	-0.120954	0.399775	0.188043			-0.0391599	0.0848932	-0.186896	0.305925
	0.215668	-0.126153	0.340864	0.238174			-0.0106484	0.0390462	-0.179439	0.289979
	0.194895	-0.102122	0.274547	0.310684			0.0247302	-0.0226974	-0.202283	0.285063
	0.173241	-0.0654023	0.254108	0.35212			0.0537809	-0.0731611	-0.216801	0.280513
	0.151759	-0.0441113	0.285535	0.346145			0.0440269	-0.104289	-0.200848	0.269315
	0.140282	-0.0574455	0.325648	0.318029			0.00896642	-0.109498	-0.169676	0.253151
	0.149726	-0.0998565	0.336156	0.302622			-0.00191605	-0.0934898	-0.146918	0.235019
	0.173494	-0.136033	0.32212	0.307931			0.0128845	-0.0738098	-0.14866	0.217021
	0.197468	-0.137394	0.313258	0.307595			0.0225254	-0.0512252	-0.17147	0.192448
	0.215447	-0.121706	0.335548	0.273281			0.0239446	-0.020277	-0.183555	0.153085
	0.223462	-0.121055	0.370903	0.222216			0.0237883	-0.00157672	-0.15926	0.114127
	0.212897	-0.132236	0.37793	0.195648			0.0179727	-0.0151537	-0.120369	0.106996
	0.190356	-0.137714	0.347863	0.214416			0.0121668	-0.0379955	-0.1126	0.135901
	0.173018	-0.133964	0.321603	0.265629			0.0106144	-0.0407759	-0.140868	0.177976
	0.167093	-0.121445	0.331877	0.31717			-0.00657591	-0.0319659	-0.174214	0.214633
	0.169943	-0.109531	0.370503	0.342747			-0.0421261	-0.0224035	-0.183883	0.236246
	0.181368	-0.119384	0.404366	0.343088			-0.0669925	-0.0118569	-0.159651	0.238407
	0.196074	-0.145786	0.407839	0.33762			-0.0634615	-0.0185238	-0.120873	0.230713
	0.198073	-0.149052	0.392435	0.331113			-0.0457051	-0.0461931	-0.103919	0.227605
	0.185514	-0.121332	0.399904	0.316866			-0.0295309	-0.062358	-0.115532	0.221604
	0.174136	-0.0980419	0.443123	0.296299			-0.0202496	-0.051397	-0.125591	0.198339
	0.171011	-0.0957117	0.476047	0.280182			-0.0193802	-0.0363992	-0.124444	0.174968
	0.170368	-0.10089	0.452698	0.292149			-0.017891	-0.0224465	-0.132888	0.180815
	0.172126	-0.106478	0.385433	0.344786			-0.0139774	-0.00339354	-0.159879	0.215261
	0.176969	-0.0989156	0.325001	0.416087			-0.0191668	0.00846118	-0.185066	0.264179
	0.177513	-0.0640675	0.309371	0.457653			-0.0440474	0.00830214	-0.182961	0.314948
	0.173045	-0.0228434	0.3345	0.453614			-0.0794981	0.00357128	-0.144354	0.33786
	0.17046	-0.0033443	0.357977	0.428966			-0.103939	-0.0129849	-0.0925325	0.320088
	0.166892	-0.000603423	0.3459	0.412975			-0.10792	-0.0508535	-0.0692466	0.29882
	0.153629	-0.00238834	0.320996	0.415785			-0.0952797	-0.0880964	-0.0989159	0.303824
	0.134617	-0.0171766	0.330695	0.417917			-0.0791841	-0.0957399	-0.151319	0.314321
	0.118438	-0.0467558	0.370696	0.390502			-0.0751951	-0.0766096	-0.169868	0.311396
	0.10676	-0.0769735	0.390549	0.340199			-0.0823107	-0.0540632	-0.13453	0.303183
	0.105676	-0.0990431	0.352314	0.311913			-0.083047	-0.0449071	-0.0805627	0.295412
	0.118511	-0.101929	0.270347	0.327347			-0.0755824	-0.0552519	-0.0529706	0.300851
	0.136823	-0.0797794	0.204507	0.356568			-0.0862352	-0.079659	-0.0709875	0.334526
	0.15405	-0.0570532	0.213553	0.365822			-0.121687	-0.0940598	-0.118374	0.377811
	0.16971	-0.0692335	0.284389	0.355871			-0.149869	-0.0897417	-0.152507	0.394216
	0.17425	-0.118335	0.344105	0.349189			-0.146743	-0.0950721	-0.148855	0.387927
	0.158963	-0.16849	0.343445	0.365957			-0.12047	-0.124694	-0.13133	0.38771
	0.138577	-0.18795	0.305165	0.39693			-0.0825208	-0.151397	-0.130175	0.391335
	0.129584	-0.172208	0.281851	0.404491			-0.0431764	-0.14644	-0.137737	0.377583
	0.125713	-0.141153	0.296561	0.373676			-0.0147314	-0.110635	-0.124957	0.343819
	0.117379	-0.120594	0.320353	0.338296			0.00460788	-0.0606763	-0.0873883	0.297692
	0.101977	-0.119597	0.311569	0.331102			0.0195633	-0.0241601	-0.052755	0.254207
	0.0764133	-0.120114	0.271464	0.349412			0.0142029	-0.022067	-0.0547893	0.241909
	0.0537644	-0.105884	0.246794	0.370062			-0.0206188	-0.0415476	-0.0986638	0.264018
	0.0588878	-0.0835286	0.272864	0.369787			-0.0544669	-0.0527499	-0.149274	0.280758
	0.0879413	-0.07065	0.334122	0.34557			-0.0648344	-0.0474752	-0.164103	0.264638
	0.110616	-0.0790695	0.378835	0.328295			-0.0641176	-0.0422133	-0.138468	0.232181
	0.116824	-0.106205	0.372378	0.337194			-0.0574812	-0.0453069	-0.113583	0.208972
	0.115773	-0.13687	0.329477	0.348706			-0.0451736	-0.0451741	-0.112327	0.203133
	0.107998	-0.158298	0.290936	0.333874			-0.0550991	-0.0321306	-0.11424	0.210161
	0.0979792	-0.170068	0.274656	0.299096			-0.0923318	-0.00205702	-0.0943164	0.210345
	0.0998434	-0.177775	0.259471	0.270394			-0.112669	0.0343813	-0.0587045	0.188628
	0.111832	-0.178972	0.223537	0.275877			-0.0956219	0.0425137	-0.0360818	0.166837
	0.122244	-0.17006	0.176479	0.31259			-0.0721417	0.00481738	-0.0590098	0.177808
	0.133295	-0.155949	0.150034	0.34244			-0.0566514	-0.0394719	-0.12435	0.217366
	0.145131	-0.154071	0.158304	0.344831			-0.0390246	-0.0459531	-0.176465	0.248979
	0.141326	-0.175672	0.176729	0.341966			-0.029462	-0.0219902	-0.172821	0.253311
	0.117143	-0.205312	0.158435	0.362956			-0.0299563	0.0046231	-0.135344	0.244275
	0.0913025	-0.218803	0.0992084	0.398642			-0.0207784	0.0127572	-0.108675	0.248466
	0.0784208	-0.20078	0.0446278	0.421467			-0.00738094	-0.0125916	-0.110902	0.277893
	0.0770524	-0.146933	0.0345989	0.411724			-0.0118912	-0.0554729	-0.126791	0.317529
	0.0922102	-0.0808561	0.055835	0.37416			-0.0255733	-0.0763962	-0.12588	0.330306
	0.125403	-0.0399582	0.0674724	0.340927			-0.0258876	-0.0724334	-0.09187	0.300181
	0.159224	-0.0334051	0.040357	0.337762			-0.0237328	-0.0778295	-0.0540449	0.2576
	0.180367	-0.0462735	-0.00396734	0.353886			-0.0314517	-0.0980273	-0.0588133	0.238952
	0.195776	-0.0730639	-0.00821248	0.356916			-0.0362899	-0.100882	-0.106364	0.242738
	0.210921	-0.110054	0.0484863	0.3337			-0.0320078	-0.0690471	-0.149864	0.244872
	0.21098	-0.141792	0.12174	0.298066			-0.0263116	-0.0151458	-0.154106	0.233851
	0.186593	-0.17041	0.159397	0.272302			-0.0194438	0.0316372	-0.130939	0.214687
	0.147434	-0.203512	0.150372	0.27096			-0.0135594	0.0364499	-0.108473	0.204085
	0.109717	-0.220053	0.125522	0.278448			-0.0260534	-0.0120295	-0.104132	0.212116
	0.0910519	-0.204923	0.128707	0.272864			-0.053216	-0.0651441	-0.106557	0.219943
	0.102958	-0.184389	0.167332	0.258235			-0.0723982	-0.0696452	-0.083031	0.20029
	0.132548	-0.17654	0.193377	0.262855			-0.0754581	-0.0397991	-0.0284467	0.161906
	0.149106	-0.160503	0.169564	0.297597			-0.0731844	-0.0169016	0.00766307	0.145555
	0.142376	-0.122866	0.124322	0.347946			-0.0718896	-0.0121753	-0.0143027	0.16545
	0.130174	-0.0787852	0.110519	0.378459			-0.070163	-0.0176781	-0.0692088	0.196597
	0.127537	-0.0419001	0.141461	0.357226			-0.067288	-0.0211219	-0.104233	0.21902
	0.134153	-0.0224963	0.185932	0.302776			-0.0562073	-0.0049124	-0.0958106	0.229255
	0.147024	-0.0306257	0.207476	0.268272			-0.0368488	0.0200974	-0.0553461	0.226888
	0.160272	-0.0469815	0.196176	0.277046			-0.0229135	0.0175466	-0.0187903	0.229024
	0.165444	-0.0423208	0.187838	0.30868			-0.0260068	-0.0123433	-0.0154866	0.249765
	0.166909	-0.0304004	0.220523	0.338512			-0.0437643	-0.032176	-0.0364413	0.257108
	0.168457	-0.034658	0.281403	0.356579			-0.0620466	-0.0247206	-0.046753	0.222577
	0.15879	-0.0453244	0.319348	0.371599			-0.0722849	-0.0134919	-0.0356389	0.176763
	0.129117	-0.0497583	0.319617	0.403724			-0.066135	-0.0241051	-0.024834	0.163425
	0.090277	-0.0546361	0.312406	0.446463			-0.0422154	-0.0559506	-0.0324666	0.186047
	0.0573301	-0.0617658	0.324124	0.459785			-0.0175658	-0.0895952	-0.0527942	0.227942
	0.0364131	-0.0675655	0.343785	0.427495			-0.00940931	-0.0985936	-0.0730135	0.2638
[truncated: 5,501 more rows]

## Sheet: panel_F
	0.0747334	0.0377491	-0.06319	-0.00779461		-0.0278297	-0.0731566	0.110918	0.116197
	0.0528737	0.060821	-0.0912498	-0.047413		-0.0445109	-0.0719681	0.0731206	0.128492
	0.0412524	0.0377044	-0.10145	-0.0832021		-0.0666663	-0.0672231	0.00848805	0.0709306
	0.0542307	-0.0220366	-0.10421	-0.0812625		-0.0844834	-0.059648	-0.00329069	-0.0031458
	0.0709147	-0.0862487	-0.0924072	-0.0418038		-0.111146	-0.0374759	0.0703002	-0.0343459
	0.0708642	-0.118565	-0.0744861	0.00638436		-0.156431	-0.00246721	0.15692	-0.0306722
	0.0705843	-0.106934	-0.0607569	0.0254922		-0.18826	0.0116236	0.168268	-0.0342084
	0.0902526	-0.0762348	-0.0535743	-0.00302467		-0.167851	-0.00780257	0.108381	-0.069936
	0.121839	-0.057968	-0.066216	-0.0560617		-0.106026	-0.03336	0.0524483	-0.124978
	0.153464	-0.0547806	-0.101859	-0.085937		-0.0471391	-0.0434958	0.0539864	-0.15621
	0.168359	-0.0497258	-0.128666	-0.0815478		-0.0259503	-0.0330108	0.0968054	-0.134063
	0.149195	-0.0370028	-0.122992	-0.0737281		-0.0442539	-0.00848926	0.111065	-0.0820098
	0.103623	-0.0182909	-0.0944523	-0.082377		-0.0697407	0.00991242	0.0511397	-0.0496243
	0.0593121	9.2978e-05	-0.0577427	-0.0956456		-0.0659226	0.0105163	-0.0394841	-0.0496286
	0.0241661	0.010706	-0.028505	-0.0976746		-0.0270689	0.00616871	-0.0748792	-0.0501373
	-0.00840114	0.0178487	-0.0233628	-0.0818209		0.0230634	0.00680084	-0.0301455	-0.0228091
	-0.0290921	0.0349269	-0.0329772	-0.0494839		0.0514543	-0.00409781	0.0300015	0.024524
	-0.0264858	0.0586749	-0.0305967	-0.0250302		0.0432225	-0.0379291	0.0269246	0.058949
	-0.00214879	0.0689151	-0.0216434	-0.0335767		0.0163272	-0.068744	-0.046187	0.0539993
	0.0298151	0.0581342	-0.0346122	-0.0669508		0.00511491	-0.0668565	-0.116729	0.0176593
	0.0536136	0.0362741	-0.0649865	-0.0946653		0.0194796	-0.0346155	-0.109724	-0.00783487
	0.0573257	0.0177321	-0.0894618	-0.10363		0.044691	0.00270768	-0.0356217	0.00368912
	0.0499744	0.0142295	-0.0901726	-0.0975284		0.0680027	0.0215165	0.0174151	0.0261726
	0.0527956	0.0260349	-0.0650375	-0.0848164		0.0788345	0.0146825	-0.00647074	0.0213073
	0.0694613	0.0309935	-0.0339882	-0.0770328		0.0700248	0.000188042	-0.0643417	-0.00628096
	0.0824143	0.0116747	-0.0335868	-0.071137		0.0416949	0.00145742	-0.0728451	-0.0253885
	0.0676035	-0.0120566	-0.0513749	-0.0568477		0.00109097	0.0244295	-0.0108782	-0.0130566
	0.0274466	-0.0154392	-0.0438106	-0.0423378		-0.0446263	0.0522488	0.0640654	0.026018
	-0.0118006	-0.00146523	0.000145031	-0.050025		-0.0753617	0.0585236	0.0705369	0.0573956
	-0.027305	0.00749284	0.0549734	-0.0858008		-0.0622839	0.0374653	-0.0102012	0.0466299
	-0.0198089	-0.00389232	0.090566	-0.126652		-0.00969241	0.00679252	-0.101614	0.00799421
	-0.0102857	-0.0287864	0.0797552	-0.144291		0.0556742	-0.0160186	-0.114897	-0.00394909
	-0.00804732	-0.0381838	0.0330874	-0.120265		0.116157	-0.026766	-0.0581936	0.035544
	-0.00875977	-0.0114749	0.00309035	-0.0658936		0.156713	-0.0302276	-0.017606	0.0907591
	-0.0032294	0.0311392	0.0126976	-0.0187723		0.163806	-0.0453017	-0.0450636	0.112921
	0.00752436	0.0533174	0.0265699	-0.0130038		0.148582	-0.0760115	-0.102711	0.0908028
	0.00911347	0.0472063	0.0120958	-0.0443158		0.134989	-0.0833117	-0.113953	0.0552968
	-0.0145097	0.0385342	-0.0231795	-0.0842317		0.116726	-0.0483714	-0.0466365	0.0587941
	-0.0548084	0.0505461	-0.0483165	-0.114547		0.0824131	-0.00698007	0.0450924	0.114714
	-0.0804721	0.0771111	-0.0351121	-0.130633		0.0338168	0.0143413	0.0707159	0.161878
	-0.0766148	0.0938075	0.00646588	-0.133482		-0.0183374	0.0154578	0.0116482	0.137573
	-0.0544831	0.0813849	0.0230704	-0.122969		-0.0566212	-0.00108003	-0.0538398	0.0658394
[truncated: 7,459 more rows]

## Sheet: panel_G
	-0.119887	-0.114532	0.0812436	-0.108109		-0.0760631	-0.0185913	-0.249843	-0.107997
[truncated: 9 more rows]

[truncated: 2 more sheets: panel_H_left, panel_H_right]
