# Supplementary material for: Stimulation of VTA dopamine inputs to LH upregulates orexin neuronal activity in a DRD2-dependent manner
Source: eLife. 2024 Apr 3;12:RP90158. doi: 10.7554/eLife.90158 (PMC10990487; doi:10.7554/eLife.90158)
Supplement: Figure 5—figure supplement 1—source data 1. [file elife-90158-fig5-figsupp1-data1.xlsx]

## Sheet: hOX_GCaMP
	-0.0784719	0.0407821	-0.00260421	0.0220418		0.0441883	0.157417	0.13968	0.183406
	-0.0872421	0.0351916	0.00631875	-0.036784		0.0444101	0.106389	0.0710758	0.268472
	-0.0866915	-0.0211107	0.109945	-0.0065144		0.0280741	0.0117536	0.0193635	0.333325
	-0.107618	-0.0171988	0.217462	0.0301641		-0.00778283	0.00515091	0.0443697	0.385225
	-0.129666	0.0870284	0.262607	0.0391037		-0.0460166	0.0384328	0.089486	0.373618
	-0.130011	0.165426	0.26849	0.0448961		-0.0738756	0.0422183	0.0725289	0.359526
	-0.108275	0.15695	0.25377	0.0218431		-0.098013	0.117476	0.0509724	0.428274
	-0.0575265	0.12861	0.216569	-0.0346276		-0.109144	0.255245	0.113302	0.53071
	0.0124416	0.0681028	0.185828	-0.0508917		-0.0934918	0.281751	0.186217	0.558168
	0.0471242	-0.0180706	0.171882	-0.0240716		-0.0644034	0.207358	0.186901	0.530664
	0.0176768	-0.00810467	0.158598	0.00919324		-0.0525656	0.160012	0.142952	0.472525
	-0.0304516	0.0832188	0.163793	0.0559968		-0.052838	0.115179	0.0732859	0.38398
	-0.0613548	0.128869	0.232905	0.117437		-0.0481676	0.0543156	-0.0209834	0.345512
	-0.0758768	0.134567	0.314458	0.136462		-0.0389541	0.0925822	-0.0791857	0.425391
	-0.0649943	0.178553	0.344285	0.105991		-0.0247633	0.190335	-0.0503993	0.510555
	-0.026222	0.198884	0.305497	0.0990052		-0.00727321	0.189355	0.0133386	0.490461
	0.00541497	0.151266	0.227181	0.152553		0.00261992	0.134267	0.075416	0.394312
	0.0026821	0.116931	0.15778	0.24241		-0.00150899	0.136604	0.171696	0.268682
	-0.0048968	0.105724	0.168693	0.351663		0.000809771	0.121894	0.263741	0.130148
	0.00507287	0.0467425	0.275385	0.455431		0.0176431	0.0532383	0.274178	0.0646941
	0.0185895	-0.0156353	0.37819	0.488113		0.0371865	0.0411094	0.252954	0.110975
	0.0236361	0.00381159	0.405281	0.421932		0.0552549	0.0636844	0.288487	0.161147
	0.0296878	0.0170815	0.39198	0.320345		0.0769947	0.0151836	0.324768	0.129567
	0.0255542	-0.0471516	0.38453	0.231978		0.100635	-0.0253079	0.319856	0.0833776
	-0.00014325	-0.105696	0.362236	0.175391		0.110663	0.0247729	0.318489	0.0552335
	-0.0159228	-0.14553	0.294863	0.173312		0.107293	0.0497153	0.293179	0.00249274
	-0.00939894	-0.220527	0.182434	0.197694		0.0990696	0.00990066	0.201881	-0.0447943
	-0.00710477	-0.261361	0.0537403	0.18496		0.0866441	0.0373711	0.122284	-0.0452934
	-0.00705577	-0.202822	-0.0165847	0.138213		0.0749413	0.117391	0.132766	-0.0548347
	0.0139482	-0.157948	0.0139054	0.118516		0.082981	0.148779	0.16218	-0.067429
	0.0319556	-0.167948	0.0849091	0.125791		0.102766	0.189601	0.142411	0.0193784
	0.0291702	-0.145503	0.128548	0.125172		0.106602	0.285917	0.0905428	0.167516
	0.038454	-0.107543	0.155715	0.0978732		0.100566	0.321255	0.00253974	0.283324
	0.0545617	-0.128852	0.204312	0.0456206		0.1017	0.284427	-0.13115	0.399411
	0.0406709	-0.146192	0.255732	-0.0196279		0.10812	0.289995	-0.215871	0.501215
	0.0197697	-0.119541	0.270629	-0.0471396		0.118469	0.290536	-0.209693	0.466498
	0.0294669	-0.136763	0.217119	0.0181619		0.135359	0.207436	-0.215568	0.326886
	0.0437154	-0.181722	0.1173	0.148443		0.129943	0.144223	-0.261672	0.202122
	0.0343478	-0.150889	0.036044	0.246814		0.085113	0.166842	-0.25257	0.129167
	0.0181903	-0.0786014	0.0499353	0.272566		0.0380474	0.161394	-0.19736	0.0728179
	-0.0014641	-0.076863	0.135298	0.238877		0.0195141	0.130324	-0.159366	0.0449891
	-0.0289622	-0.102015	0.190937	0.154811		0.0145502	0.181029	-0.0875461	0.0369426
	-0.0363245	-0.0936863	0.151367	0.0655326		0.00845243	0.247126	0.0171308	0.0155396
	-0.0101234	-0.112265	0.0639914	0.0518489		0.014407	0.232025	0.0431526	0.0217623
	0.00893327	-0.144472	-0.0107442	0.0934261		0.0231331	0.225067	0.00558224	0.116451
	0.0139862	-0.108113	-0.0568223	0.0958853		0.0199503	0.27119	0.00810611	0.212135
	0.0356899	-0.0516375	-0.0715182	0.0385475		0.0234857	0.246355	0.0215807	0.184794
	0.061188	-0.0489934	-0.0789831	-0.0324922		0.0450045	0.154537	-0.0115623	0.0767061
	0.060267	-0.0220577	-0.107271	-0.0957229		0.0571977	0.110007	-0.0400841	-0.0257701
	0.0504975	0.0362989	-0.136696	-0.129088		0.0539739	0.0726768	-0.0615555	-0.118714
	0.0461307	-0.00466648	-0.114947	-0.101812		0.0579429	-0.00976102	-0.126839	-0.152734
	0.0271732	-0.118428	-0.0532926	-0.0378719		0.0558974	-0.049288	-0.181456	-0.113737
	0.0073149	-0.175128	-0.00669588	0.0107907		0.0452479	-0.0420282	-0.166405	-0.113977
	0.0154269	-0.18506	-0.00105754	0.0387766		0.0519299	-0.121337	-0.160668	-0.182146
	0.0257603	-0.202888	-0.0287061	0.0453681		0.0730088	-0.245383	-0.200857	-0.175957
	0.00365594	-0.172596	-0.0855495	-0.0144791		0.0778455	-0.271865	-0.171587	-0.0621382
	-0.0303462	-0.115762	-0.127129	-0.117188		0.0734838	-0.236252	-0.0692054	0.0409222
	-0.0546559	-0.128866	-0.148803	-0.182844		0.0776944	-0.212195	-0.0294286	0.0880555
	-0.0762667	-0.179325	-0.154223	-0.20842		0.0720679	-0.14603	-0.0782685	0.0815462
	-0.0872129	-0.174495	-0.15095	-0.245714		0.055102	-0.0694207	-0.120328	0.0271416
	-0.0792782	-0.161413	-0.107658	-0.25806		0.0388563	-0.108955	-0.139576	-0.0232544
	-0.0777852	-0.19732	-0.022701	-0.20377		0.0180354	-0.186747	-0.119782	0.0138957
	-0.0974148	-0.204991	0.046984	-0.115839		-0.0154927	-0.170788	-0.0238796	0.0869752
	-0.106779	-0.189257	0.0460125	-0.0222256		-0.0436731	-0.147972	0.0397437	0.103728
	-0.0966502	-0.230873	-0.00839635	0.0748177		-0.0564863	-0.204039	-0.0238471	0.0750644
	-0.0947002	-0.278156	-0.110975	0.117569		-0.0726756	-0.240934	-0.118421	0.0231783
	-0.0915319	-0.24612	-0.224487	0.0916488		-0.0881649	-0.243259	-0.143306	-0.10701
	-0.0635974	-0.223169	-0.278708	0.0872196		-0.079485	-0.301097	-0.144954	-0.288944
	-0.0346988	-0.262499	-0.256391	0.138905		-0.0425345	-0.354108	-0.156729	-0.405261
	-0.0408614	-0.255159	-0.217358	0.186456		-0.00207191	-0.324279	-0.145161	-0.427468
	-0.0674768	-0.189541	-0.195095	0.211219		0.0360625	-0.315926	-0.130152	-0.414833
	-0.0930268	-0.143241	-0.183708	0.230668		0.0683624	-0.354065	-0.12566	-0.354335
	-0.104733	-0.0952487	-0.197981	0.227335		0.0799655	-0.299725	-0.079862	-0.238339
	-0.0740736	-0.0163523	-0.216636	0.181846		0.0834697	-0.171017	0.00310568	-0.12731
	-0.0401648	0.00457256	-0.196084	0.11116		0.0905711	-0.108282	0.0117521	-0.0433764
	0.0487365	-0.035918	-0.142514	0.00439821		0.0915283	-0.0764791	-0.072579	0.048639
	0.105375	-0.00774354	-0.10684	-0.122409		0.0779312	-0.0139966	-0.132659	0.0973138
	0.121044	0.0762706	-0.104299	-0.175367		0.0647527	-0.001452	-0.131615	0.0347635
	0.100543	0.119192	-0.119956	-0.106818		0.0489504	-0.0364628	-0.111479	-0.0797214
	0.0524345	0.137589	-0.174935	0.0195333		0.0141544	0.00930583	-0.0718272	-0.16896
	0.0141367	0.168054	-0.263101	0.122193		-0.030549	0.0855367	-0.0265817	-0.242909
	0.0120777	0.126881	-0.314189	0.173982		-0.0660348	0.0585647	-0.0525562	-0.286735
	0.0125239	0.0281331	-0.287266	0.12659		-0.0862328	-0.000494419	-0.117432	-0.240116
	-0.0107474	0.0119012	-0.189288	-0.0176164		-0.095278	-0.00797455	-0.128861	-0.14718
	-0.0167694	0.0720191	-0.0463965	-0.149048		-0.0878822	-0.033396	-0.112225	-0.119852
	0.0116809	0.108765	0.076745	-0.195502		-0.0693542	-0.0562138	-0.131958	-0.18584
	0.04281	0.153497	0.092661	-0.217271		-0.0562824	0.0260027	-0.156319	-0.273773
	0.0692557	0.238293	0.0215922	-0.268026		-0.0518508	0.105549	-0.154096	-0.326739
	0.089045	0.255031	-0.051361	-0.327107		-0.0448243	0.0569802	-0.160345	-0.247753
	0.0693366	0.205608	-0.0854163	-0.356185		-0.0450738	-0.0127941	-0.148717	-0.02872
	0.0183697	0.188616	-0.105052	-0.340342		-0.065024	-0.0206406	-0.0708021	0.13906
	-0.00312734	0.171434	-0.120493	-0.2839		-0.0848728	-0.0633645	0.0207599	0.0925629
	0.00642844	0.101312	-0.148142	-0.254844		-0.0960037	-0.130519	0.0520559	-0.0638086
	0.012357	0.0701504	-0.186515	-0.310123		-0.104814	-0.11657	0.0697961	-0.186237
	0.0186546	0.109865	-0.188328	-0.393885		-0.104658	-0.0885826	0.120167	-0.259475
	0.0313289	0.108052	-0.122097	-0.393766		-0.0880046	-0.116345	0.145471	-0.287987
	0.0254112	0.0714562	-0.025912	-0.306593		-0.0729716	-0.0977014	0.144392	-0.275694
	0.00795129	0.0924354	0.0367821	-0.210737		-0.0687316	-0.00824489	0.174979	-0.284594
	0.0064046	0.134349	0.0522267	-0.149031		-0.0580413	0.0346135	0.183064	-0.312701
	0.000169397	0.134785	0.0328038	-0.132642		-0.0368984	0.048008	0.108936	-0.26895
	-0.0309929	0.153928	-0.00804792	-0.160717		-0.0176488	0.113841	0.0433613	-0.157299
	-0.0563171	0.193736	-0.043456	-0.178838		-0.00306533	0.118255	0.0294688	-0.117852
	-0.060825	0.145645	-0.0451535	-0.131139		0.0193764	-0.00652558	-0.0126127	-0.18394
	-0.074111	0.0525537	-0.0378385	-0.0487387		0.0387438	-0.115046	-0.0524491	-0.27293
	-0.0961258	0.0382577	-0.0495481	0.0101934		0.041138	-0.132739	-0.0272998	-0.350595
	-0.0948811	0.0772488	-0.0525084	0.0514485		0.0369545	-0.142257	0.0125406	-0.401743
	-0.0748877	0.093731	-0.0252795	0.0996302		0.0316572	-0.112852	0.0241329	-0.369547
	-0.053449	0.134437	0.00233783	0.137149		0.01135	0.00484991	0.0605842	-0.286301
	-0.0252258	0.181703	0.0134714	0.161444		-0.0124937	0.068676	0.0932565	-0.264575
	-0.00564087	0.134711	0.012228	0.176764		-0.0121704	0.0142556	0.0502454	-0.265624
	-0.0207859	0.0510954	-0.000279802	0.16524		-0.00785134	-0.0289613	-0.00794973	-0.224581
	-0.0420368	0.0273011	-0.0282272	0.119402		-0.0142257	-0.0345674	0.0137413	-0.197374
	-0.0302184	0.0104694	-0.0669898	0.0852531		-0.0182148	-0.101247	0.0529636	-0.187118
	-0.0033761	-0.0360352	-0.133351	0.0672606		-0.0216846	-0.165083	0.0378855	-0.0749659
	-0.0214927	-0.00980907	-0.214385	0.0199632		-0.0306698	-0.131774	0.0270576	0.0945115
	-0.00253623	0.0803914	-0.260664	-0.0603214		-0.0276042	-0.0857786	0.0226153	0.190122
	0.00241922	0.114084	-0.213033	-0.122549		-0.00325609	-0.0690049	-0.0216423	0.197073
	-0.0229224	0.0995392	-0.100336	-0.152124		0.0185321	0.00635766	-0.0511253	0.130606
	-0.047486	0.12015	-0.00187503	-0.168191		0.0325264	0.0957094	-0.0333497	-0.0298641
	-0.0343837	0.133928	0.032689	-0.160008		0.0397182	0.079095	-0.053591	-0.226321
	0.00724718	0.112952	0.0102439	-0.138982		0.0317747	0.0315057	-0.11392	-0.371242
	0.0441939	0.159061	-0.0314966	-0.150009		0.00878111	0.0441773	-0.109289	-0.449186
	0.0660835	0.24528	-0.0375625	-0.206529		-0.00940188	0.0177283	-0.071997	-0.467404
	0.0641292	0.246285	0.0251238	-0.266403		-0.00986121	-0.0652655	-0.0784299	-0.367026
	0.029199	0.186951	0.0936518	-0.333812		-0.00885934	-0.0767816	-0.0814172	-0.193157
	-0.00984519	0.134091	0.116515	-0.395392		-0.00823576	-0.0439615	-0.0470516	-0.0912202
	-0.0229164	0.0367704	0.12109	-0.381923		0.00804478	-0.0811179	-0.0368683	-0.102457
	-0.023041	-0.07821	0.121686	-0.300488		0.0411129	-0.114095	-0.0612352	-0.134223
	-0.0268863	-0.0732589	0.103682	-0.225839		0.0611725	-0.0847396	-0.0692128	-0.163839
	-0.0156433	0.00420008	0.0818197	-0.185726		0.0597353	-0.0911787	-0.0949205	-0.208628
	0.01505	0.048886	0.0906282	-0.173236		0.043407	-0.126804	-0.154481	-0.195254
	0.0444573	0.0987144	0.116247	-0.167461		0.0106976	-0.0773845	-0.169969	-0.104481
	0.0790069	0.184766	0.138005	-0.129156		-0.0167114	0.00585732	-0.0987436	-0.0213217
	0.127535	0.191862	0.158315	-0.0287084		-0.0217768	0.0264889	-0.0227487	0.0317523
	0.15548	0.105763	0.159844	0.0521193		-0.0192581	0.0596652	0.0101405	0.0560968
	0.138532	0.0450073	0.142895	0.0193153		-0.0239331	0.129386	0.0313216	-0.0184815
	0.108141	0.000747681	0.130848	-0.0948901		-0.024184	0.114758	0.0239543	-0.176209
	0.0803895	-0.0687466	0.141224	-0.176727		-0.0280161	0.0248634	-0.0145437	-0.244368
	0.0432322	-0.0842594	0.117807	-0.160762		-0.0627805	-0.00627332	0.0054802	-0.183652
	0.0200257	-0.0159811	0.0247873	-0.0460705		-0.120769	-0.00102717	0.100939	-0.0613756
	0.0345756	0.007614	-0.122263	0.109657		-0.168316	-0.0284774	0.153408	0.0691034
	0.0556583	-0.0371781	-0.299106	0.193061		-0.184254	-0.0144198	0.138582	0.183447
	0.0561025	-0.0448575	-0.462232	0.133021		-0.166797	0.0469823	0.137755	0.25211
	0.061366	-0.0355611	-0.529331	0.0266471		-0.115427	0.0209013	0.137699	0.26109
	0.068439	-0.0623263	-0.479881	0.0144635		-0.058261	-0.0742785	0.115329	0.275826
	0.0576059	-0.0518078	-0.382262	0.10927		-0.0413458	-0.106087	0.126154	0.294517
	0.058999	0.00162111	-0.293913	0.232233		-0.0662679	-0.119599	0.166315	0.245401
	0.0898629	-0.0287348	-0.229804	0.330251		-0.0921417	-0.184301	0.167257	0.166995
	0.109532	-0.117633	-0.209209	0.374711		-0.103605	-0.207266	0.152045	0.170414
	0.112232	-0.142354	-0.222499	0.398147		-0.111494	-0.168572	0.17099	0.209553
	0.131902	-0.132416	-0.21727	0.482751		-0.109206	-0.171192	0.166535	0.209355
	0.145961	-0.134716	-0.176922	0.613111		-0.106105	-0.182815	0.0975556	0.187632
	0.120958	-0.0996585	-0.143312	0.676423		-0.110608	-0.11219	0.0402341	0.13039
	0.086023	-0.0562253	-0.14941	0.655743		-0.100269	-0.052573	0.0321071	-0.00167309
	0.0633157	-0.111477	-0.191679	0.631163		-0.0639643	-0.0749221	0.0168189	-0.126934
	0.0353789	-0.197148	-0.255905	0.602622		-0.0347684	-0.0745466	0.00831498	-0.182783
	0.011587	-0.205792	-0.313471	0.516067		-0.0306635	-0.0279953	0.0252078	-0.217525
	0.0115374	-0.192914	-0.318986	0.378364		-0.0362322	-0.0507557	-0.0271398	-0.239106
	0.00521079	-0.210936	-0.272381	0.237061		-0.045832	-0.118931	-0.166307	-0.194365
	-0.0201171	-0.172909	-0.21753	0.135905		-0.0566261	-0.127407	-0.230728	-0.113546
	-0.0236206	-0.0769421	-0.167656	0.136789		-0.0534014	-0.138056	-0.178315	-0.0883206
	-0.00119423	-0.0482813	-0.123009	0.233044		-0.0295863	-0.188821	-0.119391	-0.11146
	0.00241107	-0.0800246	-0.107298	0.297281		-0.00930079	-0.1689	-0.0999154	-0.142374
	-0.0154738	-0.0969751	-0.146568	0.240427		-0.000344137	-0.0821686	-0.128226	-0.196884
	-0.0272658	-0.133468	-0.190213	0.166583		0.015438	-0.052194	-0.239717	-0.286699
	-0.0399593	-0.197705	-0.212708	0.204425		0.0316327	-0.0227131	-0.356876	-0.354149
	-0.0508203	-0.188904	-0.226148	0.346162		0.0282577	0.0939207	-0.342292	-0.392964
	-0.032631	-0.130386	-0.236695	0.506974		0.017612	0.182262	-0.22915	-0.406321
	-0.0017668	-0.11923	-0.233717	0.603652		0.0228314	0.179002	-0.141328	-0.290736
	-0.000175477	-0.107214	-0.239719	0.547024		0.0261667	0.18109	-0.0942191	-0.0108961
	-0.0183722	-0.0558042	-0.252694	0.413796		0.0206396	0.175476	-0.0456142	0.244706
	-0.0370908	-0.0620536	-0.234871	0.35623		0.0203689	0.0860336	-0.0180034	0.343466
	-0.0674757	-0.1427	-0.193434	0.412676		0.0160782	0.0117266	-0.0265238	0.312132
	-0.106866	-0.169821	-0.177827	0.475479		-0.0030406	0.0322264	-0.0310175	0.197497
	-0.132324	-0.141847	-0.209741	0.496225		-0.0313135	0.0313494	-0.0680037	0.0333776
	-0.1516	-0.139456	-0.273152	0.510504		-0.0677963	-0.0120765	-0.155541	-0.0829555
	-0.175341	-0.118926	-0.351841	0.532977		-0.118097	0.0272269	-0.174326	-0.150688
	-0.175479	-0.0359254	-0.414617	0.563264		-0.156533	0.122297	-0.0917633	-0.217066
	-0.143116	0.037745	-0.415475	0.609756		-0.16659	0.147827	-0.0561866	-0.260037
	-0.118406	0.0649651	-0.374236	0.632301		-0.160187	0.158221	-0.134392	-0.25234
	-0.127916	0.124003	-0.339868	0.572586		-0.150109	0.202905	-0.23171	-0.271015
	-0.153905	0.170991	-0.308909	0.469392		-0.130958	0.171161	-0.321193	-0.370344
	-0.183247	0.119189	-0.247149	0.387109		-0.0975415	0.0814699	-0.392426	-0.461581
	-0.219534	0.0435366	-0.177038	0.315129		-0.0757632	0.0736097	-0.393913	-0.476964
	-0.249624	0.0212015	-0.129975	0.240696		-0.0514228	0.0763572	-0.358511	-0.459935
	-0.268998	-0.00366569	-0.103829	0.196821		-0.0425254	-0.0282661	-0.381729	-0.438655
	-0.29685	-0.0308197	-0.124022	0.171216		-0.0484803	-0.126717	-0.434761	-0.38811
	-0.33028	0.0185772	-0.184175	0.155076		-0.0744726	-0.145885	-0.417363	-0.353964
	-0.331454	0.0877533	-0.232344	0.195242		-0.10485	-0.170753	-0.347365	-0.372626
	-0.295838	0.108621	-0.230406	0.279104		-0.126999	-0.18527	-0.286195	-0.364562
	-0.257237	0.161124	-0.22224	0.313286		-0.153657	-0.113624	-0.229724	-0.300692
	-0.224704	0.278972	-0.230228	0.291571		-0.177497	-0.0604646	-0.194981	-0.272084
	-0.194029	0.340062	-0.23094	0.294681		-0.187821	-0.109901	-0.243274	-0.271274
	-0.174288	0.310738	-0.213301	0.361147		-0.192898	-0.141706	-0.333352	-0.250943
	-0.158857	0.288192	-0.183842	0.47071		-0.198685	-0.108821	-0.361782	-0.244046
	-0.119099	0.269957	-0.15013	0.585731		-0.191075	-0.112704	-0.362711	-0.258037
	-0.0778734	0.247966	-0.128435	0.629531		-0.169458	-0.13875	-0.383249	-0.189995
	-0.0756512	0.313928	-0.1314	0.556955		-0.154235	-0.113263	-0.363173	-0.0586421
	-0.0867848	0.45594	-0.155348	0.427536		-0.150323	-0.138294	-0.296862	0.0173923
	-0.0803066	0.503199	-0.182263	0.355979		-0.153861	-0.261756	-0.279486	0.0115925
	-0.0713797	0.43884	-0.215241	0.357783		-0.167153	-0.339405	-0.302106	0.0012917
	-0.0834688	0.390822	-0.240455	0.37114		-0.187162	-0.32527	-0.294229	0.0124417
	-0.0961882	0.340178	-0.205431	0.378241		-0.184375	-0.337276	-0.292245	0.044726
	-0.117838	0.247798	-0.0955756	0.391246		-0.153974	-0.371467	-0.298098	0.105534
	-0.157198	0.190298	0.0165482	0.400042		-0.128679	-0.359829	-0.229262	0.136568
	-0.174836	0.174512	0.0809851	0.376868		-0.123996	-0.384352	-0.111269	0.0400674
	-0.164574	0.111169	0.1039	0.410544		-0.132493	-0.46134	-0.0627342	-0.119031
	-0.17302	0.0696059	0.0915176	0.444023		-0.160404	-0.461376	-0.0699875	-0.212007
	-0.20064	0.13885	0.0543655	0.431644		-0.198544	-0.405215	-0.0527932	-0.230445
	-0.209927	0.220951	0.0190311	0.421575		-0.206424	-0.419734	-0.0267804	-0.174028
	-0.214459	0.244909	-0.00907699	0.448497		-0.18989	-0.454131	-0.0176019	-0.015925
	-0.235332	0.274002	-0.0449698	0.450853		-0.190261	-0.410895	0.0220857	0.126923
	-0.251101	0.291875	-0.0687096	0.37998		-0.213332	-0.36343	0.0562752	0.115752
	-0.257715	0.214361	-0.0622458	0.231229		-0.245778	-0.35318	-0.00468885	0.0275914
	-0.275399	0.12783	-0.0413372	0.0236305		-0.289485	-0.304235	-0.0970314	-0.0226061
	-0.283221	0.139165	-0.035915	-0.163723		-0.32869	-0.246846	-0.1244	-0.0264826
	-0.254817	0.187305	-0.0304866	-0.219003		-0.338664	-0.27841	-0.143372	0.0122455
	-0.225748	0.217095	-0.0267664	-0.156885		-0.336756	-0.331232	-0.182601	0.0982596
	-0.216918	0.286742	-0.0496127	-0.0850729		-0.34511	-0.326179	-0.174012	0.158306
	-0.201175	0.369294	-0.0943073	-0.0339065		-0.35038	-0.363044	-0.158176	0.142695
	-0.180414	0.371353	-0.12894	0.0603718		-0.336924	-0.460118	-0.199842	0.0837125
	-0.183146	0.358958	-0.158651	0.20291		-0.326416	-0.488317	-0.214498	0.00519855
	-0.192005	0.381478	-0.183765	0.232251		-0.326227	-0.460864	-0.173997	-0.131285
	-0.187389	0.33554	-0.162469	0.164309		-0.317984	-0.47638	-0.182345	-0.254077
	-0.19283	0.208848	-0.0881839	0.0402668		-0.308798	-0.467256	-0.255275	-0.245384
	-0.205464	0.146386	-0.00222801	-0.0715092		-0.309796	-0.383221	-0.304696	-0.124699
	-0.186294	0.173497	0.0611787	-0.0655742		-0.310558	-0.349341	-0.332657	-0.0412107
	-0.140905	0.215614	0.0733426	0.0714722		-0.309932	-0.379197	-0.370144	-0.00446296
	-0.105307	0.311178	0.0185821	0.206906		-0.335478	-0.367976	-0.368068	0.0148522
	-0.0823105	0.462307	-0.059414	0.25977		-0.367415	-0.350415	-0.330285	-0.00475772
	-0.0756384	0.559801	-0.0849055	0.300151		-0.361938	-0.414463	-0.32406	-0.00226323
	-0.100521	0.578191	-0.0668377	0.370045		-0.321597	-0.483893	-0.347825	0.0957065
	-0.132251	0.600314	-0.0551626	0.414914		-0.261725	-0.505244	-0.335487	0.191217
	-0.128513	0.573638	-0.0548257	0.421627		-0.19017	-0.567291	-0.330188	0.203655
	-0.0997646	0.432415	-0.0286565	0.391307		-0.129149	-0.652931	-0.370261	0.214606
	-0.0846814	0.296212	0.0350393	0.303544		-0.105298	-0.654117	-0.363739	0.234338
	-0.079023	0.249978	0.119683	0.191461		-0.110803	-0.626062	-0.283369	0.19619
	-0.0706921	0.236277	0.211733	0.127999		-0.138112	-0.665789	-0.214238	0.125065
	-0.0690077	0.244731	0.242916	0.0778037		-0.187411	-0.676372	-0.155793	0.0616792
	-0.0687247	0.330589	0.178791	-0.0175492		-0.238912	-0.608717	-0.0538665	0.00548681
	-0.0576404	0.393417	0.0810691	-0.103292		-0.267591	-0.588416	0.0313308	-0.00677221
	-0.0555714	0.33218	0.03517	-0.098861		-0.270147	-0.623396	0.0575229	0.0848542
	-0.0758121	0.24719	0.028317	-0.031127		-0.266707	-0.619459	0.0811449	0.260668
	-0.0814049	0.203808	0.0255698	0.0327588		-0.262002	-0.647946	0.072891	0.399467
	-0.0504237	0.135286	0.00832227	0.0556253		-0.259253	-0.760539	-0.0412241	0.471823
	-0.0141422	0.0657028	-0.0542221	0.0145188		-0.269571	-0.818807	-0.214271	0.529673
	-0.00398836	0.0850622	-0.147706	-0.0602391		-0.291612	-0.789652	-0.331124	0.559472
	-0.0166039	0.127584	-0.201702	-0.0623012		-0.305231	-0.794739	-0.371817	0.522914
	-0.0503862	0.13046	-0.184002	0.0138665		-0.302256	-0.809092	-0.346079	0.492537
	-0.0922776	0.156651	-0.123381	0.0828576		-0.300415	-0.750659	-0.242507	0.471826
	-0.0988443	0.195156	-0.0413368	0.118714		-0.299927	-0.711355	-0.115889	0.401723
	-0.0652866	0.154083	0.0259926	0.155394		-0.303282	-0.754637	-0.0640412	0.318947
	-0.0411918	0.074881	0.0188435	0.170324		-0.322109	-0.770621	-0.0838972	0.273093
	-0.0422972	0.0592605	-0.04627	0.135267		-0.351969	-0.741971	-0.0733681	0.183033
	-0.0299113	0.0446057	-0.0956398	0.0644241		-0.377361	-0.760125	-0.0844988	0.0636191
	-0.00480523	-0.0076284	-0.0736193	-0.0589265		-0.404387	-0.768508	-0.145659	0.0424442
	-0.000399657	-0.00846442	0.00908179	-0.242354		-0.44278	-0.682728	-0.196759	0.143543
	-0.0068176	0.0554972	0.134904	-0.417873		-0.47963	-0.622856	-0.23342	0.27307
	-0.0115973	0.0869215	0.269916	-0.495242		-0.498013	-0.650662	-0.311291	0.379384
	-0.025153	0.113931	0.336794	-0.497144		-0.493555	-0.636389	-0.380065	0.444336
	-0.0309178	0.199749	0.295429	-0.479494		-0.474951	-0.578133	-0.375482	0.435186
	-0.00964749	0.248367	0.185592	-0.461247		-0.452405	-0.587204	-0.367173	0.388339
	-0.00614277	0.221102	0.0795853	-0.426841		-0.446104	-0.613215	-0.393734	0.389935
	-0.052306	0.207291	0.0295636	-0.371232		-0.466219	-0.592424	-0.373748	0.40572
	-0.102053	0.19516	0.0716459	-0.262533		-0.486015	-0.629702	-0.300689	0.328004
	-0.122196	0.113462	0.164014	-0.0943006		-0.477587	-0.718655	-0.235241	0.222395
	-0.124456	0.0582509	0.22576	0.0537718		-0.453219	-0.709221	-0.170532	0.213704
	-0.10713	0.104025	0.235342	0.0972029		-0.435065	-0.625757	-0.102727	0.277446
	-0.0726202	0.142642	0.230822	0.0469713		-0.417976	-0.58623	-0.107156	0.365891
	-0.0638731	0.109436	0.220049	-0.0805945		-0.40724	-0.550028	-0.174661	0.478187
	-0.0841658	0.0706762	0.198443	-0.25245		-0.407855	-0.474221	-0.190652	0.459897
	-0.0893057	0.0377232	0.183326	-0.373401		-0.403623	-0.459253	-0.145904	0.353127
	-0.0842861	-0.036869	0.191439	-0.377488		-0.395356	-0.510935	-0.131676	0.2308
	-0.107745	-0.0890946	0.210295	-0.318746		-0.407677	-0.523346	-0.139524	0.167442
	-0.141372	-0.088465	0.230907	-0.242208		-0.433035	-0.532048	-0.14461	0.101529
	-0.144706	-0.132168	0.257448	-0.132706		-0.433471	-0.601165	-0.208942	0.030386
	-0.122801	-0.221102	0.278521	-0.00154841		-0.41019	-0.611479	-0.317652	-0.0388939
	-0.0898477	-0.22623	0.269052	0.0941305		-0.383101	-0.493372	-0.375984	-0.132801
	-0.0546371	-0.153654	0.240064	0.145645		-0.357056	-0.397902	-0.418276	-0.239254
	-0.056822	-0.123243	0.218061	0.181754		-0.332384	-0.370028	-0.500117	-0.253356
	-0.109699	-0.111974	0.199876	0.17591		-0.329983	-0.316832	-0.537023	-0.189063
	-0.151609	-0.105302	0.171346	0.0893575		-0.350469	-0.291503	-0.499897	-0.175576
	-0.137966	-0.184184	0.146221	-0.0615039		-0.372303	-0.357082	-0.483157	-0.244308
	-0.0998743	-0.303608	0.117662	-0.257326		-0.398826	-0.3833	-0.508097	-0.296036
	-0.0704302	-0.336413	0.0832619	-0.477978		-0.429993	-0.318688	-0.51889	-0.302477
	-0.0515305	-0.327209	0.0755644	-0.647288		-0.4453	-0.288461	-0.5481	-0.311102
	-0.0498913	-0.358809	0.109325	-0.659126		-0.439569	-0.278269	-0.597337	-0.318836
	-0.0663861	-0.352126	0.160323	-0.602994		-0.440483	-0.208813	-0.572732	-0.349866
	-0.0713598	-0.272691	0.19731	-0.538758		-0.448167	-0.165685	-0.470689	-0.443758
	-0.0589503	-0.209536	0.226964	-0.482821		-0.44619	-0.216227	-0.383328	-0.494294
	-0.0547167	-0.191975	0.228395	-0.374816		-0.451201	-0.266121	-0.325321	-0.416194
	-0.0522112	-0.172294	0.196946	-0.283061		-0.46858	-0.291997	-0.26579	-0.336459
	-0.0315148	-0.210246	0.174789	-0.207801		-0.479343	-0.37804	-0.261757	-0.347201
	-0.0150842	-0.348278	0.205851	-0.185251		-0.477577	-0.46369	-0.325509	-0.374403
	-0.0343599	-0.457664	0.268523	-0.29691		-0.477641	-0.440675	-0.35378	-0.376196
	-0.0625247	-0.480262	0.314586	-0.502751		-0.472232	-0.38897	-0.348859	-0.368956
	-0.0690489	-0.49289	0.325303	-0.661663		-0.457273	-0.38803	-0.384749	-0.31208
	-0.0626226	-0.489606	0.273491	-0.728433		-0.445712	-0.34254	-0.435652	-0.211541
	-0.044874	-0.412008	0.150927	-0.749003		-0.435569	-0.250774	-0.443989	-0.117261
	-0.00501466	-0.364128	0.0314292	-0.736726		-0.414711	-0.242041	-0.458947	-0.041607
	0.0297539	-0.4272	-0.00901241	-0.692963		-0.385521	-0.275352	-0.494762	0.0500247
	0.0285668	-0.486516	0.0393016	-0.633705		-0.367763	-0.255523	-0.492677	0.0943764
	0.0192445	-0.498136	0.161848	-0.544744		-0.351649	-0.270649	-0.475005	0.0415732
	0.0327325	-0.529728	0.331122	-0.41313		-0.324967	-0.361577	-0.486323	-0.0353419
	0.057938	-0.551411	0.44751	-0.3242		-0.297538	-0.397819	-0.48284	-0.0272268
	0.0822908	-0.500132	0.474716	-0.356663		-0.276197	-0.381197	-0.434075	0.0330424
	0.104532	-0.465993	0.480329	-0.465563		-0.25657	-0.413954	-0.418129	0.0700796
	0.0997586	-0.491221	0.524599	-0.57452		-0.253438	-0.433488	-0.4684	0.0953101
	0.0605504	-0.487923	0.583066	-0.633648		-0.287507	-0.358763	-0.518725	0.089306
	0.0373031	-0.457791	0.615507	-0.596818		-0.33704	-0.281255	-0.54716	0.0240938
	0.0497523	-0.477865	0.601494	-0.468549		-0.379615	-0.242506	-0.586615	0.00502254
	0.0650329	-0.502382	0.516266	-0.347537		-0.417736	-0.164005	-0.603709	0.0878747
	0.0762715	-0.467935	0.381656	-0.302326		-0.441965	-0.0982319	-0.553885	0.173777
	0.101779	-0.472147	0.263392	-0.309012		-0.435611	-0.138901	-0.473785	0.221022
	0.113525	-0.548672	0.200705	-0.347501		-0.407151	-0.197542	-0.371431	0.270322
	0.0831745	-0.586272	0.170982	-0.427349		-0.370674	-0.184778	-0.217569	0.302729
	0.0428459	-0.578499	0.178516	-0.508622		-0.323113	-0.192582	-0.106517	0.299117
	0.00466643	-0.59893	0.234339	-0.544739		-0.278449	-0.249722	-0.150307	0.300318
	-0.0456463	-0.58629	0.305523	-0.540614		-0.260433	-0.255453	-0.28572	0.273061
	-0.075999	-0.494041	0.364767	-0.520943		-0.267949	-0.241331	-0.400126	0.154558
	-0.0550929	-0.443427	0.41449	-0.467895		-0.278511	-0.278996	-0.49385	-0.0090773
	-0.0189202	-0.452561	0.421106	-0.413629		-0.2841	-0.261388	-0.548651	-0.102534
	0.00461262	-0.423968	0.368686	-0.405089		-0.280036	-0.138628	-0.524417	-0.116263
	0.0274047	-0.397162	0.318884	-0.413837		-0.250002	-0.0656491	-0.480593	-0.110898
	0.0333271	-0.45914	0.319178	-0.37646		-0.203634	-0.117233	-0.488063	-0.110715
	0.00605821	-0.547972	0.348837	-0.319433		-0.175064	-0.136692	-0.496719	-0.107738
	-0.0151398	-0.604477	0.393584	-0.285728		-0.172713	-0.145373	-0.468418	-0.15532
	-0.0127176	-0.672806	0.449073	-0.267428		-0.173694	-0.208753	-0.459236	-0.221084
	-0.0296808	-0.716001	0.490827	-0.284205		-0.18171	-0.25336	-0.475578	-0.241675
	-0.0707326	-0.661469	0.481823	-0.348772		-0.204013	-0.242251	-0.467454	-0.24039
	-0.0928888	-0.57976	0.422772	-0.384732		-0.225579	-0.274633	-0.454886	-0.247411
	-0.0980998	-0.577623	0.33226	-0.349381		-0.23641	-0.314747	-0.484332	-0.164809
	-0.112988	-0.591323	0.215009	-0.312597		-0.240181	-0.245506	-0.494054	0.0188161
	-0.125586	-0.570147	0.0874366	-0.342585		-0.22534	-0.148862	-0.456451	0.201665
	-0.125424	-0.585169	0.007369	-0.41681		-0.188086	-0.143003	-0.451612	0.341026
	-0.137119	-0.624845	-0.00398167	-0.499628		-0.166525	-0.144607	-0.489053	0.419013
	-0.160652	-0.603872	0.0270508	-0.571539		-0.181859	-0.092391	-0.507753	0.390279
	-0.173799	-0.567754	0.0837683	-0.593781		-0.211795	-0.0861658	-0.592753	0.294892
	-0.191043	-0.589527	0.131887	-0.564859		-0.227105	-0.10008	-0.752711	0.240708
	-0.227931	-0.592973	0.135048	-0.528888		-0.222273	-0.0414483	-0.873236	0.257096
	-0.258412	-0.563068	0.109061	-0.51602		-0.194843	-0.00643557	-0.895757	0.274817
	-0.272844	-0.596163	0.114198	-0.521167		-0.142687	-0.0532254	-0.883827	0.266945
	-0.290541	-0.670015	0.153635	-0.590649		-0.0897208	-0.0414723	-0.834679	0.285951
	-0.301077	-0.703675	0.204771	-0.739039		-0.0495904	0.0507227	-0.723858	0.332576
	-0.285762	-0.72916	0.253102	-0.852925		-0.0196716	0.0834078	-0.63509	0.388922
	-0.262165	-0.760527	0.278262	-0.831095		-0.00303491	0.0805392	-0.614647	0.464668
	-0.250352	-0.691763	0.274228	-0.724171		-0.0117372	0.122836	-0.57983	0.501681
	-0.237683	-0.54306	0.277821	-0.607737		-0.0328921	0.125685	-0.540821	0.418882
	-0.2241	-0.456165	0.316172	-0.518098		-0.0499225	0.0594862	-0.570756	0.317381
	-0.230734	-0.453923	0.349043	-0.476756		-0.079175	0.0492193	-0.640575	0.305568
	-0.254061	-0.452976	0.344675	-0.468635		-0.122464	0.0896877	-0.678689	0.341553
	-0.275168	-0.464439	0.33281	-0.416519		-0.16103	0.0605296	-0.717694	0.364552
	-0.295178	-0.514455	0.34093	-0.324508		-0.181996	0.0307361	-0.778759	0.402711
	-0.317176	-0.517615	0.350493	-0.29167		-0.190003	0.102034	-0.795688	0.396865
	-0.321052	-0.491032	0.329655	-0.363975		-0.182746	0.161589	-0.792437	0.335188
	-0.305668	-0.533936	0.293993	-0.486648		-0.172432	0.1331	-0.832574	0.293118
	-0.29491	-0.607418	0.252626	-0.607541		-0.185186	0.130387	-0.863287	0.297577
	-0.283382	-0.613514	0.228782	-0.692789		-0.216843	0.155177	-0.827618	0.277989
	-0.248019	-0.610721	0.243611	-0.708215		-0.233226	0.121775	-0.802262	0.23851
	-0.206241	-0.640907	0.266927	-0.692735		-0.212658	0.127388	-0.819184	0.258372
	-0.192271	-0.620688	0.248957	-0.696796		-0.172464	0.223216	-0.823205	0.350993
	-0.193196	-0.572441	0.201179	-0.672282		-0.12977	0.260003	-0.847174	0.444362
	-0.190338	-0.574653	0.175248	-0.542433		-0.0956154	0.202244	-0.944388	0.504547
	-0.183821	-0.574702	0.165247	-0.348054		-0.0841697	0.168691	-1.04686	0.534941
	-0.160785	-0.517151	0.164822	-0.201192		-0.0862878	0.133261	-1.07332	0.501629
	-0.117168	-0.498306	0.188442	-0.160772		-0.0787129	0.0500318	-1.05221	0.43004
	-0.0981486	-0.538562	0.222983	-0.230678		-0.0659956	0.0431762	-1.01849	0.420998
	-0.136635	-0.523533	0.237433	-0.371423		-0.0708218	0.154157	-0.972716	0.459612
	-0.18978	-0.458895	0.241566	-0.464398		-0.0792908	0.238403	-0.977344	0.467505
	-0.225358	-0.426771	0.249167	-0.45022		-0.0747468	0.258712	-1.05806	0.490096
	-0.251567	-0.392745	0.232832	-0.408646		-0.0694811	0.295832	-1.12003	0.54841
	-0.252466	-0.311519	0.177976	-0.360271		-0.071124	0.284534	-1.10936	0.582809
	-0.211631	-0.283023	0.104116	-0.336183		-0.0859254	0.155709	-1.11812	0.599738
	-0.169769	-0.323135	0.0389999	-0.374409		-0.120148	0.0322454	-1.1723	0.628916
	-0.154615	-0.32365	0.0122265	-0.386243		-0.167016	-0.00127895	-1.18888	0.583654
	-0.135126	-0.310543	0.0478531	-0.40042		-0.180426	-0.0246823	-1.16512	0.448359
	-0.120816	-0.354741	0.118412	-0.388321		-0.155956	-0.0271777	-1.14562	0.314962
	-0.147362	-0.380674	0.128696	-0.380071		-0.135493	0.0801887	-1.10475	0.257627
	-0.181392	-0.35259	0.0486534	-0.401115		-0.132315	0.193674	-1.05637	0.261307
	-0.171994	-0.388155	-0.0648942	-0.435701		-0.118886	0.219991	-1.08648	0.319474
	-0.137902	-0.47233	-0.155395	-0.493849		-0.09016	0.273812	-1.17147	0.408163
	-0.089496	-0.493514	-0.208183	-0.584965		-0.0583993	0.383145	-1.22724	0.476948
	-0.0269845	-0.495234	-0.203361	-0.653574		-0.0212615	0.39632	-1.2773	0.486931
	-0.00314861	-0.55362	-0.159309	-0.668486		0.0100895	0.300698	-1.3464	0.510673
	-0.0506633	-0.59468	-0.12781	-0.690286		0.0117858	0.195547	-1.36344	0.571356
	-0.116901	-0.581048	-0.130596	-0.746881		-0.00789149	0.0631469	-1.33294	0.556939
	-0.159091	-0.580355	-0.151089	-0.797675		-0.0232439	-0.0719017	-1.34673	0.494342
	-0.195889	-0.554789	-0.1771	-0.840154		-0.0443026	-0.0842962	-1.39615	0.416508
	-0.226031	-0.444289	-0.196342	-0.885539		-0.0736466	0.00648589	-1.39187	0.325493
	-0.224522	-0.337339	-0.187272	-0.883807		-0.0839628	0.0369388	-1.34788	0.216411
	-0.212267	-0.326145	-0.179061	-0.814513		-0.0763931	0.00647648	-1.30965	0.161815
	-0.212859	-0.325575	-0.217927	-0.738398		-0.073988	0.00381963	-1.24254	0.162648
	-0.208617	-0.305937	-0.293616	-0.706406		-0.0697067	-0.02884	-1.16458	0.171873
	-0.202039	-0.366561	-0.345894	-0.698413		-0.048348	-0.120944	-1.15352	0.237111
	-0.223372	-0.470315	-0.365514	-0.715255		-0.0349234	-0.157148	-1.16526	0.364482
	-0.25455	-0.514585	-0.37822	-0.75549		-0.0356867	-0.121593	-1.13082	0.431472
	-0.262778	-0.533289	-0.381404	-0.794878		-0.0373451	-0.148128	-1.10596	0.367052
	-0.262817	-0.564223	-0.374705	-0.840266		-0.0495499	-0.194539	-1.13909	0.217406
	-0.26727	-0.530754	-0.369937	-0.93914		-0.0832661	-0.167682	-1.16583	0.056065
	-0.252624	-0.462592	-0.349522	-1.03976		-0.118511	-0.16189	-1.18378	-0.0608021
	-0.227841	-0.456783	-0.291517	-1.03885		-0.137195	-0.224122	-1.21681	-0.0468153
	-0.223222	-0.464146	-0.236312	-0.942057		-0.156801	-0.241011	-1.19708	0.0853365
	-0.22441	-0.421429	-0.228895	-0.860779		-0.175597	-0.214252	-1.08495	0.202067
	-0.213693	-0.39901	-0.250488	-0.835487		-0.182516	-0.238229	-0.97528	0.20202
	-0.210158	-0.426977	-0.290351	-0.861443		-0.184817	-0.22124	-0.937273	0.171469
	-0.223879	-0.406075	-0.32597	-0.930204		-0.19461	-0.0953149	-0.937859	0.168894
	-0.236089	-0.357185	-0.313089	-0.973621		-0.20407	-0.00161801	-0.981242	0.196201
	-0.249156	-0.375721	-0.237548	-0.939306		-0.212459	0.00981258	-1.05983	0.296042
	-0.277557	-0.433102	-0.158184	-0.8854		-0.234812	0.0502703	-1.08485	0.458826
	-0.300875	-0.452755	-0.109653	-0.86177		-0.256746	0.0950045	-1.02003	0.56053
	-0.301026	-0.474973	-0.0879146	-0.813454		-0.255158	0.048539	-0.96909	0.586892
	-0.293419	-0.512204	-0.117377	-0.736077		-0.235678	0.00153048	-0.983234	0.627283
	-0.285292	-0.465887	-0.208979	-0.728242		-0.215302	0.0275573	-0.992072	0.700913
	-0.252279	-0.37814	-0.317787	-0.74975		-0.190724	0.0171796	-0.996157	0.778495
	-0.196551	-0.375623	-0.362067	-0.78707		-0.163267	-0.0442227	-1.02886	0.878602
	-0.152408	-0.428717	-0.367563	-0.811229		-0.148673	-0.0292621	-1.03272	0.947016
	-0.127443	-0.455264	-0.365534	-0.803768		-0.141942	0.0137147	-0.975274	0.901736
	-0.113623	-0.490495	-0.375787	-0.711958		-0.136702	-0.0316696	-0.917539	0.758058
	-0.11881	-0.512157	-0.42369	-0.593371		-0.132156	-0.0703207	-0.874989	0.604056
	-0.135994	-0.425904	-0.505245	-0.520032		-0.130749	-0.0402855	-0.812542	0.472699
	-0.131099	-0.309998	-0.566911	-0.478411		-0.126199	-0.0503685	-0.792567	0.345528
	-0.114595	-0.274894	-0.583038	-0.453166		-0.121607	-0.091076	-0.851944	0.273781
	-0.120618	-0.265922	-0.584158	-0.471542		-0.134466	-0.0476177	-0.932138	0.299388
	-0.129096	-0.225128	-0.575393	-0.53769		-0.164134	0.00390127	-0.905334	0.367839
	-0.106486	-0.218457	-0.550337	-0.60306		-0.196331	-0.0223441	-0.852199	0.422463
	-0.072987	-0.246547	-0.524305	-0.674777		-0.221892	-0.0167153	-0.801062	0.470096
	-0.055253	-0.240594	-0.496499	-0.757246		-0.239038	0.0385117	-0.737891	0.439107
	-0.034382	-0.261797	-0.44494	-0.803965		-0.23356	0.0193433	-0.718797	0.321853
	-0.0146501	-0.371466	-0.372472	-0.784867		-0.21147	-0.0381667	-0.775984	0.235158
	-0.0240702	-0.465548	-0.342646	-0.763388		-0.20092	-0.0106008	-0.812907	0.229837
	-0.0438853	-0.460473	-0.377137	-0.794884		-0.207315	0.0272062	-0.757511	0.214777
	-0.0519204	-0.450571	-0.441327	-0.869914		-0.211486	-0.00228884	-0.683228	0.200369
	-0.0721662	-0.459035	-0.497967	-0.974071		-0.212736	-0.0099987	-0.638124	0.239776
	-0.102241	-0.424791	-0.54347	-1.07034		-0.21924	0.00928593	-0.598305	0.257797
	-0.0967092	-0.407686	-0.586195	-1.0849		-0.221299	-0.0492673	-0.604966	0.193875
	-0.066437	-0.438567	-0.644641	-1.01752		-0.220244	-0.116183	-0.681731	0.118119
	-0.0451267	-0.397533	-0.72372	-0.962749		-0.224186	-0.0636009	-0.734129	0.0789896
	-0.0139893	-0.277715	-0.775092	-0.949152		-0.223987	0.00659655	-0.731751	0.0816098
	0.0280329	-0.24659	-0.761805	-0.918715		-0.212465	-0.00707593	-0.749116	0.159167
	0.0326748	-0.315726	-0.723551	-0.869257		-0.207192	-0.018354	-0.763159	0.333681
	0.000281605	-0.378014	-0.712726	-0.859889		-0.220278	-0.00998126	-0.708527	0.530504
	-0.0250138	-0.431791	-0.716736	-0.889819		-0.235852	-0.0555801	-0.671918	0.660487
	-0.0500194	-0.468392	-0.711565	-0.928138		-0.254012	-0.0702842	-0.729274	0.710793
	-0.0862202	-0.408334	-0.707178	-0.94929		-0.290788	0.0249568	-0.797201	0.682321
	-0.102065	-0.284612	-0.719346	-0.931198		-0.338688	0.0990451	-0.803123	0.568254
	-0.0919056	-0.217726	-0.756329	-0.868398		-0.366485	0.11332	-0.764035	0.465493
	-0.0920248	-0.179338	-0.806003	-0.837302		-0.37495	0.198037	-0.658972	0.462101
	-0.107414	-0.0965005	-0.830972	-0.889441		-0.373811	0.329086	-0.508227	0.47681
	-0.125216	-0.0434489	-0.79137	-0.955463		-0.351222	0.363397	-0.440493	0.470346
	-0.162503	-0.0861711	-0.699914	-0.948851		-0.31765	0.337811	-0.510414	0.526873
	-0.211977	-0.120983	-0.618667	-0.890077		-0.301654	0.326135	-0.611419	0.64671
	-0.226058	-0.106018	-0.583262	-0.814476		-0.302187	0.253395	-0.70723	0.758165
	-0.203764	-0.122229	-0.581287	-0.766408		-0.308408	0.136038	-0.840778	0.919601
	-0.185961	-0.124976	-0.595389	-0.819765		-0.346841	0.106044	-0.953599	1.11923
	-0.170683	-0.0632214	-0.632386	-0.989203		-0.405545	0.130107	-0.973331	1.23796
	-0.141589	-0.0396552	-0.678831	-1.11218		-0.43662	0.0888088	-0.947286	1.22473
	-0.117152	-0.0978118	-0.731161	-1.11319		-0.432042	0.0596612	-0.893788	1.12707
	-0.1008	-0.130392	-0.782172	-1.06976		-0.413157	0.124286	-0.761946	0.941701
	-0.0701724	-0.14796	-0.79117	-1.06223		-0.385338	0.165186	-0.634235	0.690626
	-0.0423754	-0.211905	-0.719333	-1.08983		-0.353637	0.145063	-0.617131	0.463137
	-0.0484456	-0.230902	-0.629105	-1.12144		-0.33556	0.156891	-0.642081	0.318857
	-0.0666303	-0.155623	-0.59781	-1.10577		-0.318236	0.169052	-0.619329	0.237384
	-0.0700567	-0.0927184	-0.62102	-0.997003		-0.28877	0.111956	-0.592337	0.223839
	-0.0687887	-0.0895125	-0.683889	-0.847446		-0.269307	0.103492	-0.592408	0.292007
	-0.0698072	-0.0543031	-0.774539	-0.744217		-0.277021	0.204084	-0.590705	0.406314
	-0.0583381	-0.00656068	-0.844406	-0.690558		-0.292832	0.282477	-0.641239	0.522973
	-0.0414052	-0.0273208	-0.846332	-0.655822		-0.295118	0.31806	-0.71715	0.692798
	-0.0367234	-0.0703504	-0.803849	-0.672575		-0.29318	0.405049	-0.744563	0.886287
	-0.0258339	-0.0814665	-0.743308	-0.742799		-0.285121	0.479116	-0.706955	0.95512
	0.00325228	-0.122168	-0.669692	-0.798404		-0.268921	0.468437	-0.694164	0.897346
	0.0224483	-0.194829	-0.627329	-0.849454		-0.257441	0.490499	-0.723292	0.842962
	0.0144643	-0.192282	-0.64352	-0.852887		-0.256448	0.575467	-0.718034	0.822577
	0.00173704	-0.163356	-0.684216	-0.802675		-0.247202	0.573433	-0.699276	0.831269
	-0.0114236	-0.189489	-0.694726	-0.714442		-0.229077	0.475187	-0.700764	0.849103
	-0.0323656	-0.18534	-0.682957	-0.677868		-0.224388	0.407543	-0.692622	0.833479
	-0.0326428	-0.110692	-0.672479	-0.717441		-0.223165	0.34608	-0.687238	0.681386
	0.000375482	-0.0722435	-0.66025	-0.733567		-0.222051	0.24208	-0.746086	0.468357
	0.0267707	-0.0794524	-0.66732	-0.712211		-0.238353	0.212171	-0.817145	0.32558
	0.0320982	-0.0466169	-0.697917	-0.718465		-0.271476	0.266709	-0.807901	0.262392
	0.0520144	-0.0368448	-0.706253	-0.778768		-0.286177	0.257515	-0.764759	0.229965
	0.0800235	-0.0940426	-0.676618	-0.877806		-0.264076	0.200994	-0.74984	0.212472
	0.0784226	-0.12219	-0.642597	-0.980417		-0.225022	0.207923	-0.739652	0.212357
	0.0634634	-0.09231	-0.592102	-1.01147		-0.19149	0.210716	-0.731187	0.189834
	0.063527	-0.0950972	-0.522502	-0.954158		-0.176412	0.1591	-0.759528	0.196921
	0.0648356	-0.119274	-0.481151	-0.900304		-0.180126	0.175484	-0.768317	0.305679
	0.0596649	-0.092	-0.492614	-0.918585		-0.186901	0.256273	-0.690848	0.419961
	0.0662484	-0.0744283	-0.534877	-0.951035		-0.177739	0.261971	-0.616652	0.420575
	0.0656916	-0.113465	-0.598876	-0.926164		-0.161481	0.229284	-0.641365	0.364294
	0.0407233	-0.120821	-0.686433	-0.861075		-0.1581	0.285948	-0.717988	0.287408
	0.0341484	-0.075928	-0.757076	-0.806271		-0.156392	0.363152	-0.782341	0.185604
	0.0619557	-0.0922078	-0.770148	-0.784588		-0.141507	0.387478	-0.840385	0.116605
	0.0810708	-0.152593	-0.741924	-0.801211		-0.129022	0.433538	-0.87871	0.0984327
	0.0859508	-0.169758	-0.702543	-0.818658		-0.134643	0.469075	-0.872583	0.0314055
	0.106667	-0.202733	-0.65829	-0.749114		-0.14542	0.387771	-0.875796	-0.0845383
	0.119341	-0.27406	-0.616535	-0.63175		-0.161755	0.283023	-0.889379	-0.141451
	0.105301	-0.281367	-0.600673	-0.601978		-0.184427	0.285497	-0.835317	-0.0956316
	0.0996519	-0.230818	-0.623763	-0.709553		-0.193999	0.309572	-0.744658	0.0128019
	0.106111	-0.236447	-0.697683	-0.860545		-0.181335	0.29725	-0.74109	0.166062
	0.0910381	-0.262469	-0.820512	-0.990418		-0.162943	0.33342	-0.802337	0.325483
	0.0668716	-0.24004	-0.927315	-1.0745		-0.149128	0.368437	-0.83791	0.386935
	0.0615243	-0.220684	-0.948905	-1.11942		-0.134977	0.285829	-0.861373	0.333974
	0.0562412	-0.219248	-0.912554	-1.11741		-0.130094	0.196007	-0.892311	0.28006
	0.0437002	-0.168797	-0.89738	-1.1428		-0.141891	0.221717	-0.869993	0.287261
	0.0477855	-0.0978619	-0.927927	-1.16988		-0.15563	0.237739	-0.824506	0.309969
	0.0581863	-0.100872	-0.988441	-1.14904		-0.148736	0.183114	-0.840743	0.374726
	0.0464797	-0.124931	-1.06012	-1.08356		-0.1311	0.174083	-0.874734	0.446588
	0.0282982	-0.105803	-1.13599	-1.01516		-0.114136	0.204562	-0.878759	0.403843
	0.0210109	-0.107619	-1.19571	-0.931441		-0.092056	0.194703	-0.851305	0.24662
	-0.00200285	-0.153009	-1.22915	-0.839921		-0.0769657	0.218661	-0.850939	0.116667
	-0.0463784	-0.140903	-1.22823	-0.796006		-0.0885358	0.296203	-0.823839	0.0553783
	-0.0754047	-0.0838522	-1.19578	-0.784855		-0.114841	0.278894	-0.788221	0.0473279
	-0.0815	-0.0946212	-1.15502	-0.749426		-0.137179	0.182937	-0.792888	0.115891
	-0.0808233	-0.128686	-1.13722	-0.706724		-0.165701	0.174403	-0.776975	0.212052
	-0.0573378	-0.114491	-1.13513	-0.686197		-0.185909	0.22616	-0.729029	0.227626
	-0.00746509	-0.120736	-1.1129	-0.645221		-0.170203	0.216837	-0.768521	0.197427
	0.0318196	-0.166933	-1.08116	-0.589322		-0.137828	0.216379	-0.901136	0.180731
	0.0477377	-0.168005	-1.07912	-0.57612		-0.114705	0.274076	-0.978315	0.174566
	0.0611093	-0.165078	-1.10396	-0.581023		-0.101495	0.279248	-0.964867	0.114067
	0.0694828	-0.219188	-1.12471	-0.547269		-0.0890749	0.258226	-0.914832	0.0419672
	0.0139536	-0.234916	-1.13505	-0.525288		-0.0823065	0.331812	-0.828248	-0.000109222
	0.00921268	-0.175311	-1.13057	-0.554757		-0.0753507	0.405074	-0.765375	0.00247252
	0.00244206	-0.137021	-1.0971	-0.602888		-0.0679178	0.351856	-0.813342	0.0721379
	-0.0261478	-0.135069	-1.06419	-0.642369		-0.0763979	0.281645	-0.923127	0.19087
	-0.0680537	-0.0802227	-1.05929	-0.686232		-0.104336	0.257146	-0.980878	0.236217
	-0.0922739	-0.0199767	-1.07165	-0.69734		-0.130686	0.184702	-1.02064	0.143658
	-0.0987582	-0.0457734	-1.07439	-0.671974		-0.140846	0.104486	-1.07266	0.0494842
	-0.106091	-0.103597	-1.05821	-0.666023		-0.151649	0.106699	-1.0519	0.0450723
	-0.101846	-0.14371	-1.01557	-0.70073		-0.162347	0.093993	-0.946194	0.0834104
	-0.0788877	-0.214532	-0.952771	-0.71034		-0.159038	0.0168076	-0.870021	0.119511
	-0.0666609	-0.28487	-0.927882	-0.700505		-0.143449	0.0293767	-0.870967	0.144474
	-0.0752665	-0.242752	-0.962235	-0.711685		-0.123391	0.152912	-0.912791	0.112317
	-0.0765117	-0.152747	-1.0136	-0.716666		-0.0936396	0.233562	-1.01197	0.0887428
	-0.0733114	-0.101574	-1.03531	-0.702251		-0.065704	0.254307	-1.12113	0.191384
	-0.0932368	-0.0194095	-1.05015	-0.724894		-0.0599312	0.266205	-1.11283	0.374177
	-0.117815	0.089739	-1.06347	-0.778102		-0.0512498	0.194009	-0.990547	0.468192
	-0.123137	0.104801	-1.05426	-0.801042		-0.0160278	0.0349275	-0.877638	0.445863
	-0.11984	0.0497984	-1.05003	-0.799385		0.0261056	-0.0415028	-0.82726	0.398006
	-0.106943	0.0288353	-1.07071	-0.808424		0.0508218	-0.0103807	-0.813908	0.378316
	-0.0746211	-0.0212156	-1.09718	-0.831714		0.0523826	0.0043746	-0.86354	0.365151
	-0.0621943	-0.125195	-1.12936	-0.884358		0.029118	0.0320774	-0.967517	0.342903
	-0.103806	-0.164252	-1.18732	-0.958666		-0.0168261	0.146806	-1.04763	0.254304
	-0.148945	-0.11713	-1.23503	-0.970364		-0.0584576	0.23061	-1.10311	0.0709977
	-0.150603	-0.0818024	-1.22425	-0.860502		-0.0789691	0.223914	-1.17252	-0.104946
	-0.124793	-0.059364	-1.15516	-0.694023		-0.0837077	0.249104	-1.20379	-0.125056
	-0.0818955	-0.00718629	-1.04348	-0.596519		-0.0760797	0.307926	-1.13667	-0.0139306
	-0.013971	-0.00991849	-0.925953	-0.570299		-0.0417997	0.305795	-1.03397	0.138652
	0.0350197	-0.0913881	-0.843262	-0.551111		0.00980686	0.292417	-0.934684	0.279791
	0.0338522	-0.128572	-0.803665	-0.489133		0.0516183	0.319987	-0.795274	0.311371
	0.0329977	-0.0929741	-0.764112	-0.361473		0.0811572	0.28872	-0.638616	0.185524
	0.0650226	-0.0781637	-0.705626	-0.146199		0.0979446	0.199285	-0.549651	0.02934
	0.104985	-0.0431042	-0.658146	0.0713975		0.0781341	0.187991	-0.48992	-0.0496799
	0.148589	0.074734	-0.61257	0.182822		0.0241917	0.229677	-0.387976	-0.0810905
	0.197752	0.160845	-0.512796	0.168368		-0.018103	0.21077	-0.286195	-0.0606718
	0.212948	0.17881	-0.351118	0.0558813		-0.0286599	0.186943	-0.227253	0.0373517
	0.19123	0.22515	-0.183358	-0.128712		-0.00596224	0.238127	-0.150804	0.161729
	0.182216	0.261343	-0.0562372	-0.26499		0.051694	0.27846	-0.0500564	0.235159
	0.189239	0.189719	-0.0072426	-0.246019		0.11757	0.276443	0.0344584	0.27179
	0.187851	0.0904981	-0.0489638	-0.105339		0.153633	0.407331	0.156595	0.287404
	0.20297	0.0230032	-0.13422	0.0734243		0.168692	0.598618	0.33645	0.294611
	0.255442	-0.0662387	-0.178807	0.281913		0.193526	0.69844	0.464571	0.382251
	0.305802	-0.131194	-0.182036	0.515611		0.222009	0.748729	0.513123	0.667135
	0.326406	-0.0676715	-0.112388	0.762372		0.236703	0.80419	0.576395	1.08066
	0.328876	0.0734101	0.00942674	1.05373		0.242214	0.765589	0.648873	1.44162
	0.307616	0.164381	0.13836	1.40345		0.249125	0.667507	0.661192	1.6516
	0.255768	0.216717	0.2223	1.72236		0.253743	0.65524	0.63986	1.70394
	0.209917	0.249842	0.263836	1.92261		0.26284	0.693971	0.693015	1.61071
	0.18947	0.202961	0.30586	2.0427		0.290704	0.689886	0.753746	1.51942
	0.165384	0.109867	0.354625	2.14494		0.311534	0.705991	0.842764	1.55645
	0.142814	0.0998393	0.382936	2.2505		0.304365	0.747977	1.00738	1.65851
	0.158262	0.165161	0.405931	2.38882		0.285533	0.701428	1.15334	1.72725
	0.194316	0.220464	0.453983	2.55622		0.269968	0.626544	1.17309	1.79606
	0.20277	0.309567	0.518776	2.6339		0.246432	0.665899	1.15317	1.85804
	0.189078	0.433282	0.573609	2.595		0.232698	0.751856	1.16413	1.87573
	0.17585	0.49124	0.620388	2.56121		0.247061	0.752237	1.15744	1.90737
	0.166602	0.495222	0.631732	2.61482		0.261801	0.734581	1.12987	2.00729
	0.178673	0.524297	0.585331	2.72314		0.259813	0.752216	1.1633	2.13851
	0.222605	0.513019	0.517128	2.87366		0.245945	0.717429	1.23916	2.26709
	0.258543	0.420556	0.466597	3.0028		0.227077	0.676407	1.31679	2.41484
	0.248164	0.368345	0.441391	3.02546		0.210622	0.737527	1.40662	2.52815
	0.218532	0.394122	0.469388	2.96762		0.215824	0.800714	1.43471	2.52886
	0.198914	0.434245	0.574315	2.95909		0.236719	0.784121	1.31824	2.46315
	0.192029	0.487352	0.692004	3.02859		0.239495	0.821784	1.15764	2.46083
	0.204166	0.584425	0.729473	3.10674		0.210078	0.927399	1.10819	2.51234
	0.24467	0.639152	0.769272	3.1481		0.167826	0.954839	1.13611	2.51865
	0.28961	0.605665	0.790713	3.13718		0.142068	0.936931	1.15134	2.44787
	0.308966	0.599463	0.798934	3.06563		0.140531	0.965057	1.16831	2.28932
	0.318884	0.668454	0.787709	3.00372		0.161452	0.953174	1.16236	2.07017
	0.331351	0.723131	0.753678	3.04041		0.18758	0.872332	1.09179	1.93574
	0.317011	0.741205	0.67144	3.13359		0.185034	0.862762	1.02921	1.93478
	0.27241	0.778879	0.562161	3.1996		0.152295	0.911158	1.05726	1.9466
	0.244098	0.770296	0.49507	3.25681		0.125559	0.894123	1.10263	1.89726
	0.252022	0.689662	0.490715	3.30645		0.127669	0.868964	1.14132	1.87585
	0.279613	0.641269	0.508119	3.29533		0.141405	0.909774	1.18958	1.92484
	0.320975	0.607866	0.522241	3.25843		0.160698	0.908377	1.21648	2.01858
	0.346076	0.503584	0.515709	3.23685		0.180438	0.828845	1.15524	2.12566
	0.318101	0.416614	0.454908	3.20335		0.191609	0.814617	1.05571	2.18693
	0.264172	0.462661	0.378771	3.14765		0.201662	0.87024	1.01071	2.1094
	0.241455	0.557734	0.35723	3.12186		0.21936	0.885455	0.994111	1.93544
	0.239444	0.619366	0.405337	3.10581		0.226366	0.907915	1.00131	1.83646
	0.22311	0.669985	0.482234	3.0651		0.204404	0.982554	1.08037	1.85687
	0.210211	0.679414	0.551369	3.00878		0.171376	0.986013	1.17942	1.88308
	0.208623	0.615701	0.58638	2.96276		0.150252	0.921869	1.19225	1.85916
	0.194293	0.583122	0.574393	2.89681		0.14051	0.934572	1.14358	1.80888
	0.180591	0.646715	0.558626	2.7996		0.132017	0.97594	1.1118	1.73457
	0.190446	0.673585	0.587102	2.71566		0.128138	0.947819	1.09397	1.71447
	0.186606	0.591279	0.648614	2.68766		0.118789	0.942818	1.10788	1.83397
	0.145616	0.502961	0.676328	2.69532		0.0892407	0.998188	1.20882	2.00595
	0.1182	0.459966	0.653234	2.7257		0.0566543	0.97275	1.30225	2.0837
	0.124612	0.432859	0.620724	2.75237		0.0330891	0.864619	1.25332	2.08485
	0.134537	0.486884	0.601603	2.71734		-0.00241322	0.810032	1.11822	2.0703
	0.154391	0.620191	0.592362	2.62729		-0.0477623	0.778688	1.01983	2.07259
	0.195021	0.673739	0.593203	2.59294		-0.0666789	0.694019	0.977636	2.14143
	0.221276	0.638599	0.585306	2.64085		-0.0594288	0.626775	0.969775	2.28749
	0.231547	0.643307	0.553076	2.70357		-0.0485743	0.609729	1.0353	2.39048
	0.260171	0.676834	0.521257	2.75328		-0.0359737	0.53937	1.11108	2.37731
	0.289023	0.671351	0.51407	2.79662		-0.0352846	0.44742	1.11579	2.32392
	0.284286	0.700222	0.514082	2.82123		-0.0616768	0.461059	1.10751	2.31458
	0.268431	0.781491	0.526898	2.84615		-0.0910633	0.511455	1.10262	2.3178
	0.265864	0.814925	0.589714	2.90426		-0.0912273	0.493249	1.01623	2.33023
	0.259384	0.817141	0.677792	2.95194		-0.0800634	0.486248	0.882652	2.35764
	0.252895	0.862642	0.726469	2.95244		-0.0763698	0.522295	0.817359	2.32728
	0.231779	0.896606	0.717645	2.94659		-0.0707402	0.494724	0.807332	2.29808
	0.236195	0.841484	0.654872	2.99242		-0.0555465	0.442632	0.775472	2.30102
	0.239781	0.788415	0.554569	3.03499		-0.0507114	0.451399	0.763571	2.33048
	0.262172	0.804962	0.45604	3.02116		-0.0615355	0.414963	0.791024	2.29095
	0.292976	0.822779	0.409175	2.97948		-0.0717833	0.276192	0.813968	2.21139
	0.287516	0.841848	0.391379	2.94227		-0.0838157	0.186088	0.850377	2.17014
	0.254769	0.914988	0.360834	2.88536		-0.081921	0.215388	0.931919	2.12747
	0.244134	0.953261	0.343091	2.84272		-0.0382514	0.262665	0.975687	2.05132
	0.259365	0.877718	0.381192	2.81557		0.0283171	0.327597	0.951548	2.004
	0.28281	0.809943	0.452376	2.7284		0.0606777	0.459017	0.980019	1.96588
	0.322353	0.794508	0.491748	2.57594		0.0473588	0.555082	1.09358	1.87159
	0.363108	0.751728	0.465109	2.46483		0.00391276	0.553744	1.15308	1.73753
	0.36523	0.717735	0.355597	2.42218		-0.0681771	0.565159	1.15832	1.58604
	0.332111	0.766763	0.229316	2.4241		-0.132405	0.603661	1.1647	1.38904
	0.29196	0.818035	0.203333	2.47331		-0.149797	0.551433	1.14482	1.20671
	0.24759	0.816042	0.280517	2.53507		-0.134003	0.464994	1.08085	1.17171
	0.199333	0.845176	0.34408	2.54864		-0.116333	0.446837	1.07088	1.33174
	0.172833	0.885683	0.329718	2.54352		-0.0977088	0.417657	1.1074	1.59698
	0.171972	0.854336	0.297001	2.55073		-0.0743247	0.346113	1.08393	1.88747
	0.177087	0.798869	0.300304	2.51515		-0.0596051	0.35719	0.991075	2.12126
	0.197993	0.812767	0.354662	2.41119		-0.0583694	0.423501	0.898043	2.19503
	0.246056	0.858009	0.450001	2.33318		-0.0737094	0.409416	0.8117	2.12521
	0.28041	0.879642	0.518529	2.35811		-0.101267	0.372544	0.768478	2.07022
	0.255566	0.927213	0.451075	2.4486		-0.135804	0.388357	0.832291	2.04944
	0.196996	0.96991	0.389863	2.55077		-0.15765	0.364884	0.92746	1.98575
	0.143788	0.922119	0.344721	2.64283		-0.163246	0.290619	0.953605	1.90567
	0.10339	0.851777	0.313879	2.68187		-0.174954	0.29834	0.937898	1.86611
	0.0921104	0.863171	0.288487	2.64424		-0.194977	0.367102	0.942658	1.83589
	0.123276	0.878036	0.257171	2.60471		-0.203343	0.381932	0.915094	1.8494
	0.158115	0.842179	0.179341	2.58277		-0.196601	0.37933	0.847608	1.87622
	0.164894	0.837406	0.0578022	2.55219		-0.18765	0.401873	0.8263	1.90644
	0.168744	0.837956	-0.0164357	2.53274		-0.171575	0.364613	0.84907	1.88504
	0.172854	0.785749	0.0124145	2.5622		-0.155825	0.289774	0.789499	1.84935
	0.153176	0.768597	0.0824594	2.59963		-0.154092	0.325326	0.778163	1.80856
	0.12876	0.838814	0.137215	2.62641		-0.15141	0.424663	0.802174	1.68609
	0.126921	0.878487	0.180288	2.64322		-0.136019	0.45224	0.796347	1.48777
	0.124535	0.860292	0.212	2.61409		-0.12651	0.475886	0.745115	1.33015
	0.108028	0.875322	0.224977	2.51489		-0.144012	0.555834	0.731846	1.2694
	0.113801	0.906201	0.2321	2.4121		-0.186449	0.580216	0.746143	1.27419
	0.13811	0.891937	0.228218	2.36083		-0.246219	0.54015	0.732227	1.37083
	0.145648	0.892372	0.197301	2.3505		-0.289933	0.53626	0.724524	1.5553
	0.152764	0.957214	0.172229	2.35446		-0.315073	0.490425	0.762585	1.74155
	0.184065	0.986672	0.181759	2.38144		-0.312307	0.341732	0.789842	1.9036
	0.209061	0.954071	0.194166	2.40431		-0.300261	0.24222	0.795167	2.04498
	0.20807	0.942567	0.180857	2.3792		-0.30233	0.259748	0.82967	2.03849
	0.20204	0.925939	0.169084	2.34284		-0.305037	0.268864	0.836402	1.84297
	0.171889	0.839995	0.203049	2.36462		-0.296666	0.251067	0.737109	1.61848
	0.10136	0.766829	0.276681	2.4187		-0.290057	0.282983	0.620437	1.49927
	0.0443374	0.742966	0.390357	2.44012		-0.288893	0.302169	0.582484	1.45844
	0.0363936	0.668807	0.515847	2.4118		-0.275264	0.263426	0.575367	1.48241
	0.0358618	0.580528	0.592568	2.29569		-0.258379	0.267601	0.579448	1.54922
	0.0187102	0.58434	0.585336	2.12502		-0.247753	0.310835	0.629061	1.56853
	0.00467741	0.629677	0.521597	2.02811		-0.236894	0.249753	0.651654	1.50673
	-0.0052648	0.651705	0.428015	2.06237		-0.237793	0.136345	0.580508	1.46727
	-0.0143441	0.723579	0.320625	2.14763		-0.266903	0.121216	0.506277	1.51197
	-0.00478617	0.842886	0.230404	2.23287		-0.305326	0.137316	0.477969	1.57423
	0.00941023	0.887799	0.186609	2.29978		-0.319884	0.101956	0.408503	1.6173
	-0.014907	0.864441	0.166041	2.31914		-0.312726	0.101156	0.328527	1.63676
	-0.0665306	0.854528	0.137818	2.24937		-0.298007	0.122591	0.329929	1.59892
	-0.0891526	0.839999	0.11315	2.12515		-0.282122	0.051147	0.364537	1.54853
	-0.0733282	0.780573	0.0974028	2.00508		-0.27213	-0.0295554	0.37589	1.62351
	-0.046213	0.752441	0.088603	1.93423		-0.28053	-0.00637576	0.410719	1.79429
	-0.0120769	0.765069	0.109109	1.93679		-0.297067	0.0196052	0.449274	1.87911
	0.0226232	0.729957	0.198089	2.0282		-0.298809	0.00390353	0.407632	1.85139
	0.038112	0.681658	0.332469	2.12597		-0.303326	0.0558052	0.348618	1.79417
	0.0480758	0.697295	0.441841	2.13966		-0.31875	0.155982	0.36271	1.7386
	0.0658043	0.691665	0.488382	2.11457		-0.316373	0.177227	0.38245	1.74827
	0.0588247	0.594389	0.473789	2.12802		-0.290298	0.153006	0.322655	1.85634
	0.0137032	0.521976	0.418368	2.1523		-0.268641	0.134995	0.226246	1.94855
	-0.0275247	0.507693	0.361066	2.17906		-0.258816	0.0428807	0.105784	1.92484
	-0.0478773	0.482936	0.333591	2.22366		-0.255878	-0.100928	-0.0234947	1.87533
	-0.072926	0.49224	0.313325	2.23377		-0.274541	-0.139316	-0.0379059	1.84134
	-0.104056	0.582528	0.29642	2.18648		-0.296884	-0.0813899	0.108892	1.7394
	-0.132329	0.658547	0.328803	2.15499		-0.305027	-0.0570285	0.253718	1.52822
	-0.16118	0.6787	0.407765	2.17501		-0.314738	-0.0284762	0.272088	1.31922
	-0.179028	0.724317	0.479558	2.21332		-0.339466	0.0314402	0.239804	1.22268
	-0.157376	0.78346	0.511691	2.27759		-0.352755	-0.0113146	0.217823	1.27654
	-0.115488	0.748461	0.518778	2.36649		-0.33362	-0.144869	0.214351	1.45988
	-0.107437	0.689602	0.494842	2.42977		-0.291738	-0.198351	0.257325	1.66474
	-0.136807	0.702082	0.467466	2.42888		-0.243811	-0.18765	0.31479	1.7536
	-0.163799	0.739541	0.492484	2.4045		-0.209075	-0.210744	0.302152	1.74858
	-0.181781	0.76569	0.56218	2.3506		-0.203486	-0.192949	0.276738	1.80072
	-0.200096	0.849496	0.62116	2.2514		-0.231458	-0.117734	0.361219	1.91411
	-0.198392	0.930973	0.656458	2.15429		-0.26231	-0.0999769	0.500875	1.97981
	-0.177197	0.901222	0.690146	2.11472		-0.271409	-0.121046	0.568271	1.95908
	-0.161467	0.839694	0.702519	2.08558		-0.276608	-0.08184	0.568423	1.90991
	-0.137775	0.843967	0.685102	2.03546		-0.291439	-0.039726	0.557611	1.84705
	-0.0972989	0.813112	0.664723	1.98984		-0.312487	-0.0758166	0.526495	1.83052
	-0.081753	0.717729	0.631385	1.95585		-0.342887	-0.110703	0.488461	1.87378
	-0.106829	0.658631	0.573733	1.92353		-0.376353	-0.117656	0.497146	1.87673
	-0.12436	0.592669	0.521105	1.93504		-0.38293	-0.188426	0.491954	1.77074
	-0.124122	0.462542	0.495035	1.97976		-0.365438	-0.282387	0.418812	1.65712
	-0.136712	0.370611	0.471939	2.01012		-0.352981	-0.269664	0.348266	1.63591
	-0.155631	0.363557	0.468938	2.03963		-0.344986	-0.212673	0.340477	1.69691
	-0.16235	0.3386	0.526043	2.12181		-0.337951	-0.206511	0.316527	1.80065
	-0.166889	0.298026	0.620537	2.2177		-0.344709	-0.172356	0.248365	1.91983
	-0.163284	0.309186	0.709901	2.25145		-0.371398	-0.096015	0.205861	1.95304
	-0.129379	0.31994	0.778491	2.20728		-0.398313	-0.0959835	0.1879	1.85657
	-0.108439	0.298472	0.80349	2.11985		-0.415684	-0.13943	0.153995	1.74836
	-0.151216	0.324937	0.753917	2.03201		-0.425188	-0.124907	0.132623	1.70263
	-0.219361	0.407531	0.675045	1.9748		-0.430985	-0.143489	0.103936	1.63745
	-0.259249	0.419341	0.632264	1.97044		-0.434743	-0.24233	0.00435794	1.53048
	-0.279988	0.368831	0.634255	1.96685		-0.45238	-0.285381	-0.0804658	1.4703
	-0.284548	0.36052	0.653398	1.91759		-0.487251	-0.244307	-0.0131636	1.48575
	-0.257669	0.348947	0.6843	1.86095		-0.504814	-0.241844	0.153262	1.5777
	-0.232752	0.273139	0.713516	1.84837		-0.487907	-0.27326	0.266902	1.77928
	-0.236325	0.225826	0.728534	1.83574		-0.455807	-0.274139	0.303064	2.00105
	-0.234047	0.245436	0.744552	1.80693		-0.421396	-0.328176	0.284537	2.11652
	-0.211662	0.250767	0.787708	1.7973		-0.390854	-0.470594	0.224761	2.14423
	-0.194288	0.283879	0.837174	1.80326		-0.388651	-0.571913	0.207075	2.13456
	-0.181548	0.393861	0.862702	1.79304		-0.406543	-0.587214	0.278871	2.06085
	-0.166796	0.461944	0.868334	1.80553		-0.404892	-0.604108	0.3113	1.92981
	-0.176093	0.407583	0.846348	1.83526		-0.380346	-0.588027	0.222198	1.83215
	-0.203814	0.318952	0.790429	1.83255		-0.349099	-0.485787	0.127786	1.81643
	-0.20552	0.226828	0.732308	1.78255		-0.311053	-0.444243	0.117923	1.85001
	-0.179313	0.0922784	0.696541	1.72078		-0.264947	-0.515511	0.139704	1.91427
	-0.163826	-0.00286416	0.661129	1.65398		-0.232147	-0.557202	0.184698	1.97887
	-0.158426	-0.00583866	0.618536	1.59967		-0.224363	-0.566054	0.254512	1.94372
	-0.137632	0.00264735	0.618233	1.60183		-0.23608	-0.648888	0.267547	1.80568
	-0.113646	-0.01392	0.682216	1.66715		-0.267556	-0.718559	0.209558	1.71832
	-0.107316	0.0280529	0.773486	1.72428		-0.314284	-0.691174	0.206632	1.75073
	-0.105052	0.111139	0.840284	1.75864		-0.356336	-0.683406	0.263757	1.82808
	-0.100955	0.122006	0.855445	1.80875		-0.375273	-0.719051	0.273124	1.92575
	-0.104052	0.0899918	0.82133	1.82417		-0.393862	-0.685253	0.23568	2.0029
	-0.0903936	0.091995	0.787197	1.74121		-0.416801	-0.613185	0.203914	1.98542
	-0.0521513	0.0808389	0.81904	1.62648		-0.420225	-0.615947	0.153424	1.91221
	-0.054427	0.0410651	0.89185	1.55624		-0.399997	-0.638024	0.10306	1.89013
	-0.0694366	0.0722226	0.929503	1.50659		-0.372745	-0.633549	0.145758	1.87617
	-0.106017	0.132441	0.900214	1.48759		-0.341076	-0.702247	0.232104	1.79947
	-0.136128	0.12345	0.840798	1.50533		-0.314925	-0.821255	0.262975	1.73002
	-0.152367	0.120381	0.797294	1.51618		-0.321157	-0.850647	0.277683	1.73773
	-0.133391	0.173823	0.75396	1.51836		-0.350166	-0.82913	0.316672	1.77823
	-0.0835044	0.183861	0.728179	1.57706		-0.379307	-0.85912	0.302432	1.83663
	-0.0567782	0.115821	0.716815	1.65571		-0.404021	-0.84261	0.227753	1.93981
	-0.0915001	0.0679245	0.714929	1.69292		-0.425094	-0.734499	0.202925	2.03065
	-0.160508	0.0372845	0.742227	1.7094		-0.441226	-0.691672	0.242829	2.057
	-0.221123	-0.0112897	0.802401	1.75397		-0.453716	-0.726539	0.307503	2.09034
	-0.256502	-0.0205047	0.83275	1.79223		-0.463703	-0.717094	0.412653	2.15376
	-0.24977	0.0136629	0.808032	1.79731		-0.456896	-0.705111	0.553023	2.15207
	-0.20659	-0.0172701	0.786992	1.78055		-0.432625	-0.737288	0.586509	2.06589
	-0.169351	-0.110144	0.803761	1.74493		-0.411484	-0.69606	0.53087	1.96271
	-0.152749	-0.131731	0.846609	1.69602		-0.414366	-0.602804	0.51358	1.85724
	-0.122825	-0.0891536	0.898517	1.73763		-0.425943	-0.621933	0.512994	1.75275
	-0.0900473	-0.0565333	0.939407	1.90997		-0.425274	-0.729552	0.461336	1.70554
	-0.0934789	0.00793644	0.926752	2.10396		-0.428689	-0.802662	0.405145	1.67901
	-0.102983	0.107638	0.877826	2.20815		-0.44142	-0.876873	0.39729	1.59422
	-0.0725394	0.113969	0.850548	2.22261		-0.458603	-0.980799	0.396342	1.517
	-0.0227084	0.0447871	0.837753	2.15497		-0.487353	-1.00078	0.401908	1.57321
	0.0107353	0.034465	0.81124	2.04122		-0.524625	-0.926573	0.444678	1.70318
	0.0315449	0.0364879	0.790233	1.98185		-0.539312	-0.888044	0.451752	1.777
	0.0287024	0.000824558	0.806713	1.98607		-0.533068	-0.869668	0.378483	1.76396
	-4.53197e-05	0.0109613	0.845731	1.96741		-0.532857	-0.792348	0.335053	1.67401
	-0.00883543	0.0659302	0.90524	1.89566		-0.537672	-0.758938	0.383854	1.51952
	0.0170514	0.048222	0.967136	1.81166		-0.530199	-0.818802	0.432648	1.39241
	0.0331317	-0.0141881	0.98652	1.72413		-0.505057	-0.829442	0.431148	1.35529
	0.0225511	-0.0279427	0.952924	1.65262		-0.460071	-0.773224	0.405935	1.33781
	0.013127	-0.0469591	0.922321	1.61868		-0.398351	-0.758836	0.342165	1.31181
	-0.00525687	-0.0978518	0.934326	1.60163		-0.355601	-0.749703	0.272294	1.36308
	-0.0470923	-0.0884863	0.973103	1.5289		-0.369037	-0.691354	0.314389	1.48573
	-0.0692477	-0.0121763	1.01329	1.40494		-0.418652	-0.689891	0.447114	1.56005
	-0.0554855	0.0199893	1.02264	1.30551		-0.452041	-0.747638	0.520414	1.55834
	-0.0415085	0.0209875	0.965466	1.2677		-0.463665	-0.735677	0.509868	1.51978
	-0.0221721	0.0551274	0.874674	1.26212		-0.482516	-0.682545	0.495121	1.44624
	0.0293784	0.0493194	0.833462	1.29962		-0.506622	-0.713762	0.47044	1.3877
	0.0713552	-0.0158143	0.860785	1.3493		-0.530992	-0.797204	0.429238	1.40892
	0.0658447	-0.0115325	0.901265	1.35992		-0.55023	-0.852519	0.430544	1.44816
	0.0362793	0.0549007	0.929253	1.35325		-0.537637	-0.932267	0.442648	1.4294
	-0.00196877	0.0523788	0.96073	1.39294		-0.49379	-1.02721	0.358298	1.40018
	-0.0498463	0.0213149	0.997891	1.43629		-0.467532	-1.0351	0.240204	1.38755
	-0.0506669	0.0301663	1.03757	1.43791		-0.472863	-0.989329	0.202598	1.31151
	0.000995852	0.0164261	1.0915	1.42721		-0.476702	-0.990705	0.210207	1.18188
	0.0607425	-0.0227515	1.13503	1.43466		-0.479248	-0.9615	0.19036	1.0972
	0.0892585	-0.000897089	1.13255	1.46057		-0.491884	-0.845622	0.173451	1.09506
	0.0946371	0.0388839	1.10093	1.52697		-0.507588	-0.796401	0.156213	1.13972
	0.084097	0.00423869	1.0826	1.64117		-0.52208	-0.849623	0.132069	1.23057
	0.0599525	-0.0166282	1.08004	1.74856		-0.546246	-0.865959	0.189307	1.3292
	0.0535043	0.0378462	1.0652	1.80345		-0.556035	-0.852126	0.332519	1.3462
	0.0748042	0.0659346	1.04784	1.84187		-0.521063	-0.887725	0.396617	1.291
	0.0828187	0.0237793	1.02672	1.88874		-0.463344	-0.881796	0.320234	1.2584
	0.0617125	0.00925678	0.993419	1.89858		-0.431541	-0.798405	0.227804	1.25178
	0.0545589	0.030602	0.956147	1.88722		-0.437907	-0.77824	0.175739	1.23077
	0.0784127	0.0227625	0.934361	1.89213		-0.456926	-0.838106	0.122475	1.24074
	0.108695	0.0491291	0.915036	1.84939		-0.480661	-0.87842	0.10709	1.27389
	0.138368	0.138081	0.905231	1.69577		-0.501193	-0.917105	0.124394	1.24088
	0.15719	0.177445	0.925956	1.54095		-0.513327	-0.989657	0.0812366	1.14655
	0.138583	0.153173	0.947101	1.49147		-0.537278	-0.9997	-0.0175847	1.03651
	0.103093	0.200551	0.94709	1.56034		-0.57203	-0.938983	-0.0638806	0.875411
	0.0975029	0.297741	0.96949	1.69835		-0.588679	-0.958649	-0.0570904	0.658179
	0.117362	0.355554	1.04689	1.80932		-0.583687	-1.0515	-0.04437	0.489749
	0.125362	0.411708	1.12623	1.78435		-0.584247	-1.07946	0.0307588	0.434242
	0.118813	0.447128	1.16188	1.68405		-0.588514	-1.06774	0.15197	0.483701
	0.104201	0.363102	1.18393	1.63009		-0.586795	-1.08643	0.217842	0.642021
	0.0721918	0.210365	1.19449	1.60727		-0.577173	-1.04843	0.216432	0.880246
	0.033872	0.147426	1.17068	1.52521		-0.551323	-0.956708	0.223562	1.07643
	0.0233966	0.160599	1.1264	1.4251		-0.512117	-0.945212	0.202774	1.1267
	0.0445279	0.175961	1.0912	1.37099		-0.477853	-0.971418	0.123736	1.08299
	0.0713497	0.231226	1.06653	1.34264		-0.469252	-0.924932	0.0613981	1.00491
	0.108178	0.321167	1.06813	1.30322		-0.477197	-0.896964	0.0594866	0.901848
	0.161715	0.349867	1.10526	1.27935		-0.484712	-0.951561	0.0646582	0.839606
	0.203	0.330797	1.12406	1.25284		-0.487617	-0.966313	0.0731383	0.867837
	0.219532	0.35882	1.09906	1.1902		-0.501445	-0.939364	0.120717	0.915369
	0.236738	0.370626	1.07088	1.14485		-0.528268	-0.988059	0.156412	0.941916
	0.246419	0.302558	1.0766	1.14421		-0.559536	-1.06466	0.146686	1.01725
	0.233446	0.249702	1.0813	1.13449		-0.591741	-1.06658	0.159004	1.13017
	0.235104	0.250222	1.07068	1.09262		-0.603625	-1.05204	0.184572	1.14866
	0.269253	0.220888	1.06605	1.05443		-0.58483	-1.0511	0.131105	1.05887
	0.301552	0.204779	1.07041	1.00165		-0.56426	-0.969238	0.028277	0.972929
	0.325138	0.296387	1.07791	0.955262		-0.562305	-0.847342	-0.020253	0.954395
	0.358306	0.401358	1.09404	0.989045		-0.602287	-0.819302	-0.0473069	1.00864
	0.369395	0.446244	1.09661	1.09014		-0.562587	-0.827782	-0.107954	1.1067
	0.326875	0.493673	1.06633	1.16192		-0.512508	-0.775075	-0.154706	1.16885
	0.280955	0.522899	1.04468	1.18296		-0.461111	-0.753591	-0.169703	1.10869
	0.2808	0.434302	1.07281	1.17631		-0.421694	-0.79519	-0.190396	1.00702
	0.313083	0.313512	1.11534	1.14669		-0.408251	-0.784718	-0.200018	0.979196
	0.353931	0.291569	1.11414	1.08223		-0.412466	-0.779583	-0.163486	0.980252
	0.387288	0.305448	1.12006	1.01875		-0.405705	-0.896404	-0.171005	0.951293
	0.373111	0.286989	1.10569	0.964193		-0.38964	-1.03236	-0.248762	0.934962
	0.318013	0.277325	1.08334	0.914125		-0.392727	-1.0836	-0.279674	0.9372
	0.296067	0.266747	1.09068	0.901233		-0.417497	-1.1349	-0.22771	0.939524
	0.321775	0.204131	1.14483	0.986375		-0.437388	-1.18667	-0.207692	0.991861
	0.338493	0.173652	1.20734	1.12223		-0.442144	-1.1332	-0.250449	1.07277
	0.337835	0.232707	1.2312	1.24455		-0.437314	-1.03639	-0.303557	1.05313
	0.350056	0.257348	1.21696	1.36855		-0.418278	-0.999555	-0.348637	0.953414
	0.369631	0.206866	1.18759	1.47712		-0.405565	-0.946224	-0.3496	0.908379
	0.401687	0.212022	1.16164	1.48877		-0.412859	-0.837794	-0.234982	0.934227
	0.469073	0.2897	1.16901	1.41128		-0.408156	-0.805237	-0.0984493	0.958804
	0.542706	0.338949	1.19972	1.31291		-0.373587	-0.861468	-0.0973709	0.971606
	0.576319	0.386566	1.2105	1.20879		-0.354348	-0.901466	-0.190352	0.959037
	0.580751	0.441798	1.19283	1.12614		-0.377074	-0.964682	-0.264929	0.889604
	0.577817	0.388849	1.19381	1.11462		-0.42431	-1.09833	-0.329979	0.826329
	0.557139	0.231264	1.21374	1.14361		-0.488196	-1.17967	-0.378059	0.859841
	0.526568	0.113758	1.20722	1.13744		-0.55199	-1.15463	-0.351041	0.940526
	0.520907	0.054672	1.1694	1.10886		-0.583701	-1.14581	-0.315435	0.987497
	0.534293	-0.0122959	1.15296	1.10834		-0.579716	-1.13873	-0.361192	1.02266
	0.535848	0.00953373	1.17604	1.15254		-0.571751	-1.03078	-0.404456	1.03421
	0.533981	0.119693	1.20936	1.21475		-0.570986	-0.919513	-0.387015	0.969695
	0.543743	0.207723	1.22502	1.28961		-0.566314	-0.914861	-0.389872	0.871505
	0.542783	0.226451	1.19543	1.33875		-0.567893	-0.949805	-0.43748	0.76169
	0.528711	0.240704	1.1185	1.33087		-0.5828	-1.0102	-0.474588	0.609315
	0.524752	0.211919	1.05465	1.31261		-0.599833	-1.16328	-0.534407	0.435918
	0.516816	0.100661	1.05018	1.32904		-0.612174	-1.30298	-0.642437	0.372438
	0.488696	0.0492598	1.08474	1.29379		-0.632719	-1.3023	-0.696085	0.440047
	0.483351	0.125505	1.1243	1.19062		-0.644384	-1.23843	-0.681017	0.540344
	0.521151	0.219825	1.16442	1.11892		-0.629471	-1.201	-0.679241	0.627576
	0.565253	0.279961	1.17946	1.11129		-0.618475	-1.12553	-0.678477	0.697387
	0.593246	0.351744	1.17281	1.10465		-0.632597	-1.02222	-0.595655	0.721466
	0.603016	0.369152	1.19153	1.1038		-0.656391	-1.01142	-0.498075	0.710646
	0.573658	0.290977	1.24014	1.09681		-0.673706	-1.06393	-0.46843	0.717603
	0.503466	0.250867	1.23849	1.05161		-0.684779	-1.08858	-0.463179	0.707364
	0.449841	0.276146	1.16152	0.998318		-0.675884	-1.14825	-0.497829	0.632373
	0.450357	0.262957	1.10257	0.975658		-0.654645	-1.26481	-0.493406	0.540549
	0.475916	0.214282	1.11324	0.937026		-0.642822	-1.30486	-0.479182	0.503879
	0.490082	0.210025	1.18517	0.855854		-0.641029	-1.26783	-0.44646	0.489493
	0.497053	0.191449	1.28906	0.793598		-0.643919	-1.26697	-0.482975	0.447963
	0.499183	0.113231	1.37619	0.737115		-0.655703	-1.25421	-0.60219	0.398131
	0.491362	0.0696543	1.39015	0.783818		-0.677271	-1.16837	-0.681651	0.327326
	0.500111	0.0721082	1.3582	0.878942		-0.685079	-1.116	-0.684971	0.207816
	0.530746	0.0471955	1.32646	0.991406		-0.668738	-1.14092	-0.678954	0.112714
	0.5465	0.0293792	1.27887	1.04003		-0.649117	-1.1551	-0.677351	0.114593
	0.54896	0.0873983	1.22619	0.998124		-0.645151	-1.18798	-0.659703	0.165615
	0.569635	0.117626	1.22347	0.955774		-0.656711	-1.3204	-0.678817	0.23544
	0.586935	0.065393	1.26674	0.990416		-0.68095	-1.46012	-0.733214	0.373993
	0.571886	0.0476179	1.30024	1.0755		-0.719206	-1.49932	-0.734161	0.552597
	0.561932	0.0874952	1.31677	1.18975		-0.746021	-1.50225	-0.687307	0.67739
	0.571932	0.0961374	1.33625	1.29597		-0.748208	-1.51451	-0.726531	0.738828
	0.576165	0.101284	1.3366	1.32664		-0.742429	-1.45492	-0.735822	0.752717
	0.577234	0.147951	1.33888	1.28021		-0.736877	-1.3633	-0.685437	0.678444
	0.588371	0.130346	1.37623	1.25182		-0.722522	-1.34799	-0.63613	0.549814
	0.583426	0.0328325	1.44123	1.23838		-0.708065	-1.35837	-0.636774	0.475966
	0.555968	-0.0155227	1.50018	1.20198		-0.701386	-1.3418	-0.655447	0.460795
	0.547427	-0.00217409	1.53642	1.15945		-0.687261	-1.39583	-0.692256	0.42098
	0.560716	0.00530624	1.52471	1.16402		-0.666742	-1.49362	-0.781804	0.340841
	0.558242	0.0611012	1.44143	1.21902		-0.656883	-1.46553	-0.854781	0.265281
	0.543258	0.200894	1.33991	1.30492		-0.664693	-1.33504	-0.852071	0.206765
	0.539645	0.307281	1.30872	1.38794		-0.675902	-1.23155	-0.84214	0.232317
	0.528462	0.342239	1.36723	1.4218		-0.687436	-1.13247	-0.85805	0.391881
	0.507848	0.365505	1.46743	1.37981		-0.698662	-1.02835	-0.815415	0.557461
	0.517745	0.335032	1.55799	1.32105		-0.697762	-1.02793	-0.725011	0.577989
	0.547989	0.194522	1.58314	1.32618		-0.687281	-1.09798	-0.665766	0.48752
	0.555284	0.0785623	1.5334	1.35846		-0.693227	-1.11811	-0.61527	0.366423
	0.552808	0.0943762	1.46985	1.35098		-0.720355	-1.13597	-0.539473	0.229929
	0.563827	0.153132	1.46377	1.32297		-0.736273	-1.21571	-0.511259	0.143955
	0.573329	0.201506	1.5043	1.28798		-0.733332	-1.25855	-0.530838	0.169206
	0.59072	0.271199	1.54774	1.2328		-0.720936	-1.21913	-0.499759	0.247831
	0.648081	0.316875	1.58731	1.22612		-0.692562	-1.21203	-0.440768	0.307281
	0.697444	0.293799	1.64581	1.3007		-0.655519	-1.22894	-0.467916	0.369062
	0.699965	0.297057	1.72048	1.37561		-0.634675	-1.16352	-0.566176	0.403334
	0.677085	0.337301	1.80053	1.3832		-0.626995	-1.09262	-0.676839	0.350168
	0.661671	0.298543	1.88538	1.35392		-0.614055	-1.10844	-0.810742	0.286719
	0.651912	0.19812	1.9645	1.29763		-0.612702	-1.11966	-0.911653	0.323839
	0.652647	0.158634	2.00596	1.23825		-0.629213	-1.10116	-0.891768	0.435235
	0.677038	0.16563	1.9912	1.23957		-0.648155	-1.16989	-0.824116	0.538898
	0.704909	0.141316	1.90167	1.34069		-0.705592	-1.27615	-0.811004	0.605718
	0.707804	0.137309	1.73664	1.47975		-0.708215	-1.29766	-0.782339	0.575593
	0.702053	0.169482	1.55542	1.58952		-0.709353	-1.28825	-0.701938	0.422633
	0.70698	0.160904	1.46478	1.63495		-0.700529	-1.29638	-0.639332	0.289083
	0.709428	0.127811	1.47749	1.58044		-0.691472	-1.23296	-0.606206	0.302411
	0.718326	0.143376	1.52527	1.40551		-0.685003	-1.13331	-0.550943	0.4115
	0.757272	0.145399	1.56849	1.23583		-0.670851	-1.13079	-0.537456	0.502396
	0.803328	0.0799385	1.61568	1.19033		-0.648377	-1.15778	-0.6056	0.52552
	0.825328	0.076075	1.68465	1.22851		-0.637955	-1.10809	-0.668659	0.42798
	0.838252	0.166732	1.78351	1.27618		-0.634349	-1.06981	-0.692191	0.23982
	0.838415	0.233657	1.90232	1.31905		-0.629315	-1.10503	-0.75926	0.126977
	0.797355	0.258346	1.97389	1.30942		-0.64586	-1.11886	-0.730213	0.18187
	0.733197	0.299915	1.97813	1.25301		-0.687076	-1.10633	-0.621267	0.320386
	0.68715	0.285699	1.96632	1.25223		-0.729469	-1.14961	-0.517827	0.427957
	0.659358	0.160544	1.96918	1.30301		-0.763617	-1.1688	-0.478999	0.485497
	0.630511	0.0511581	1.95675	1.30973		-0.793141	-1.09031	-0.426559	0.487517
	0.607978	0.0158319	1.92848	1.27716		-0.804527	-1.03953	-0.409088	0.431445
	0.605588	0.0159778	1.92715	1.28292		-0.792556	-1.07035	-0.499233	0.375762
	0.618553	0.0823759	1.94648	1.3326		-0.768782	-1.06951	-0.615375	0.359945
	0.651319	0.234265	1.95806	1.40855		-0.734107	-1.05854	-0.640103	0.336663
	0.71144	0.329489	1.98044	1.50093		-0.692473	-1.12365	-0.631795	0.297516
	0.769506	0.307283	2.02095	1.57306		-0.660435	-1.16508	-0.654237	0.306171
	0.792755	0.289997	2.05719	1.59331		-0.662652	-1.13417	-0.662041	0.338274
	0.811625	0.290656	2.08507	1.60366		-0.688337	-1.15048	-0.657382	0.314581
	0.840438	0.225258	2.11919	1.61292		-0.714183	-1.22109	-0.66356	0.265261
	0.841991	0.147185	2.11959	1.57164		-0.735812	-1.22877	-0.642523	0.24567
	0.817507	0.142638	2.07439	1.44051		-0.75118	-1.2113	-0.573412	0.214795
	0.808353	0.140067	2.02114	1.29701		-0.753913	-1.25296	-0.537673	0.166256
	0.815111	0.109874	1.99362	1.19766		-0.754104	-1.28151	-0.537912	0.151223
	0.832629	0.139071	1.99456	1.16146		-0.76217	-1.25083	-0.497355	0.126543
	0.879696	0.18978	2.04083	1.21244		-0.752462	-1.25177	-0.42291	0.058962
	0.919518	0.175731	2.11442	1.33747		-0.720557	-1.28002	-0.377199	0.027456
	0.900274	0.167152	2.13905	1.44822		-0.700335	-1.24225	-0.323151	0.0638532
	0.857171	0.229924	2.0948	1.51705		-0.706352	-1.20816	-0.23544	0.0719978
	0.847135	0.263432	2.03393	1.58302		-0.722091	-1.25358	-0.204371	-0.00624933
	0.858227	0.258391	1.99791	1.62712		-0.743362	-1.26892	-0.226895	-0.125238
	0.860404	0.309604	1.9973	1.59925		-0.764695	-1.20255	-0.286237	-0.240513
	0.85336	0.361731	2.05196	1.51035		-0.767986	-1.17402	-0.334437	-0.318489
	0.824567	0.313954	2.13893	1.3921		-0.766198	-1.20133	-0.395901	-0.293177
	0.77026	0.235099	2.19263	1.25284		-0.787194	-1.19212	-0.390711	-0.152175
	0.740765	0.200307	2.19799	1.1289		-0.820656	-1.19127	-0.27179	-0.00256149
	0.7653	0.151855	2.2037	1.07507		-0.830718	-1.23308	-0.169494	0.0906162
	0.800006	0.123501	2.22534	1.08246		-0.815585	-1.19822	-0.126164	0.133453
	0.816213	0.198113	2.23566	1.07558		-0.807356	-1.06904	-0.143494	0.0924256
	0.83868	0.29902	2.22009	1.03911		-0.788441	-0.991849	-0.198449	-0.0169775
	0.865554	0.324644	2.20218	1.01372		-0.797288	-0.982091	-0.257401	-0.0838755
	0.891582	0.350043	2.20668	0.995941		-0.837215	-0.963903	-0.225789	-0.099559
	0.94505	0.414145	2.27181	1.06798		-0.883565	-0.995887	-0.114647	-0.154315
	1.01497	0.421629	2.40051	1.20384		-0.904513	-1.09722	-0.0722781	-0.225799
	1.0482	0.382326	2.52287	1.32471		-0.908763	-1.14296	-0.131532	-0.231729
	1.05017	0.379702	2.55244	1.36288		-0.899069	-1.10623	-0.199384	-0.184378
	1.05597	0.377091	2.5012	1.36803		-0.861514	-1.10017	-0.256396	-0.128493
	1.04908	0.326791	2.43136	1.38363		-0.81696	-1.09164	-0.319973	-0.0843587
	1.00718	0.323077	2.38862	1.33216		-0.803582	-0.98586	-0.317966	-0.111315
	0.959266	0.381187	2.38749	1.19454		-0.819637	-0.883926	-0.264167	-0.264177
	0.93295	0.390602	2.41348	1.04191		-0.840479	-0.876225	-0.247112	-0.465678
	0.923071	0.376283	2.40924	0.940599		-0.865743	-0.880684	-0.258879	-0.611943
	0.925639	0.423442	2.35132	0.914611		-0.881333	-0.88712	-0.198466	-0.703348
	0.938884	0.477971	2.29144	0.974371		-0.871952	-0.973175	-0.13119	-0.770715
	0.942374	0.474265	2.26915	1.04858		-0.852271	-1.04808	-0.132156	-0.784753
	0.930384	0.494362	2.27053	1.02951		-0.848386	-1.02	-0.144259	-0.743273
	0.940151	0.537755	2.28003	0.922094		-0.861529	-1.00355	-0.141543	-0.676059
	0.982225	0.505011	2.3166	0.856639		-0.88022	-1.04807	-0.16695	-0.536903
	1.02072	0.441091	2.37029	0.899094		-0.909529	-1.03622	-0.194128	-0.332676
	1.04943	0.441881	2.42523	1.01101		-0.936855	-0.971227	-0.213327	-0.186157
	1.08397	0.448984	2.49348	1.16832		-0.940045	-0.971534	-0.297404	-0.14374
	1.10644	0.41369	2.56002	1.31965		-0.922224	-1.00003	-0.447325	-0.14765
	1.10609	0.43928	2.56573	1.3738		-0.903481	-1.00368	-0.535515	-0.10843
	1.10678	0.522554	2.51336	1.34868		-0.886787	-1.06705	-0.555263	-0.114956
	1.10119	0.563919	2.47999	1.32372		-0.871679	-1.1715	-0.584645	-0.154357
	1.05783	0.583598	2.49247	1.27112		-0.872798	-1.17619	-0.608836	-0.170152
	0.998785	0.630609	2.52721	1.18589		-0.88155	-1.11092	-0.582874	-0.179747
	0.966367	0.624385	2.57806	1.14576		-0.882719	-1.10987	-0.554998	-0.196186
	0.970916	0.544704	2.62022	1.14602		-0.874508	-1.12113	-0.541123	-0.216142
	0.992978	0.526747	2.63234	1.10132		-0.865184	-1.09457	-0.480095	-0.286596
	1.01531	0.586745	2.63784	1.03822		-0.853525	-1.12675	-0.420667	-0.412912
	1.02228	0.63435	2.66471	1.0067		-0.849724	-1.20403	-0.43248	-0.470884
	1.01292	0.681625	2.67329	1.01195		-0.86902	-1.19514	-0.45427	-0.402205
	1.02001	0.754231	2.66159	1.05772		-0.8988	-1.14888	-0.410579	-0.318876
	1.0658	0.75252	2.66931	1.17313		-0.916676	-1.17367	-0.352326	-0.308817
	1.10629	0.669553	2.70915	1.29843		-0.91476	-1.19954	-0.300138	-0.320665
	1.09421	0.651692	2.75774	1.33773		-0.910759	-1.20031	-0.2183	-0.325675
	1.06012	0.679691	2.82077	1.27891		-0.910554	-1.28968	-0.153168	-0.332659
	1.03269	0.6492	2.90851	1.19601		-0.909697	-1.44068	-0.157445	-0.317582
	1.00034	0.609436	2.97966	1.14712		-0.910939	-1.5115	-0.161586	-0.331681
	0.983993	0.617224	3.02278	1.17476		-0.908776	-1.5273	-0.119518	-0.469058
	1.00811	0.580796	3.04797	1.28061		-0.896306	-1.55347	-0.108866	-0.655747
	1.04281	0.497591	3.03012	1.36276		-0.887006	-1.51741	-0.175517	-0.742419
	1.07343	0.477956	2.94894	1.32014		-0.896305	-1.42843	-0.248796	-0.725944
	1.12487	0.495616	2.85116	1.21762		-0.907501	-1.42479	-0.315544	-0.659934
	1.17136	0.482888	2.80195	1.15335		-0.915183	-1.4868	-0.382198	-0.556202
	1.16915	0.500747	2.82719	1.11994		-0.942496	-1.48541	-0.402648	-0.464695
	1.14399	0.579042	2.93252	1.09347		-0.991379	-1.47752	-0.36682	-0.466431
	1.13224	0.598563	3.07746	1.07854		-1.03707	-1.53311	-0.370835	-0.536899
	1.12852	0.555177	3.15172	1.04294		-1.0666	-1.55683	-0.450057	-0.622055
	1.13088	0.54568	3.09562	0.976143		-1.07557	-1.52482	-0.419832	-0.718368
	1.15569	0.534468	2.96524	0.945487		-1.04983	-1.52459	-0.377628	-0.798656
	1.17291	0.461901	2.84324	0.977526		-1.00048	-1.50334	-0.417825	-0.758643
	1.15042	0.418193	2.7468	1.04004		-0.951774	-1.37447	-0.47416	-0.584138
	1.12176	0.443616	2.68657	1.10871		-0.910075	-1.2722	-0.483914	-0.417058
	1.12116	0.435665	2.66456	1.19353		-0.861142	-1.29118	-0.500728	-0.352759
	1.12135	0.415681	2.66145	1.27018		-0.817369	-1.32607	-0.522469	-0.398871
	1.11345	0.48246	2.66664	1.3156		-0.801477	-1.34611	-0.506406	-0.567251
	1.12598	0.570499	2.72463	1.34441		-0.808443	-1.42388	-0.497891	-0.77408
	1.14493	0.595966	2.85942	1.36359		-0.831301	-1.48733	-0.546153	-0.860387
	1.15287	0.62811	3.01641	1.31629		-0.859905	-1.45512	-0.574171	-0.794935
	1.17826	0.676529	3.14642	1.23135		-0.862525	-1.4341	-0.560145	-0.6768
	1.21049	0.648559	3.21894	1.19842		-0.820473	-1.46869	-0.580756	-0.546209
	1.20109	0.599896	3.2096	1.21178		-0.772307	-1.45971	-0.619961	-0.429954
	1.16605	0.621515	3.15086	1.21342		-0.744917	-1.42223	-0.589758	-0.392758
	1.15425	0.650916	3.12237	1.23989		-0.725848	-1.46227	-0.53524	-0.425473
	1.16564	0.62741	3.13494	1.31597		-0.719078	-1.51758	-0.513547	-0.467465
	1.1871	0.639386	3.13094	1.40119		-0.739036	-1.50434	-0.470776	-0.538569
	1.21975	0.702138	3.08353	1.4745		-0.772793	-1.50655	-0.404332	-0.669118
	1.24561	0.714474	3.03199	1.52122		-0.798021	-1.5365	-0.397504	-0.765699
	1.24932	0.712241	3.00168	1.49104		-0.815247	-1.49583	-0.415418	-0.756478
	1.25616	0.779594	2.9997	1.39782		-0.808061	-1.43305	-0.401787	-0.701501
	1.28878	0.839514	3.04581	1.33842		-0.76111	-1.45276	-0.405632	-0.675445
	1.31455	0.82997	3.11915	1.34269		-0.702187	-1.45971	-0.444163	-0.690218
	1.30008	0.854275	3.17638	1.34727		-0.668767	-1.37371	-0.438706	-0.753938
	1.2705	0.900221	3.23344	1.32046		-0.668244	-1.3093	-0.436391	-0.83025
	1.26106	0.864904	3.31778	1.29161		-0.688657	-1.30342	-0.508513	-0.812992
	1.27546	0.80857	3.38921	1.26749		-0.733656	-1.26832	-0.586299	-0.694622
	1.32875	0.799783	3.40104	1.26659		-0.780627	-1.23834	-0.614396	-0.601891
	1.41097	0.76265	3.38615	1.32132		-0.803908	-1.29322	-0.659159	-0.55068
	1.45959	0.691804	3.36809	1.39266		-0.811523	-1.33872	-0.749002	-0.449943
	1.4439	0.704065	3.35487	1.39138		-0.818678	-1.31794	-0.798453	-0.31956
	1.40716	0.76528	3.36534	1.36386		-0.815743	-1.32266	-0.791946	-0.264682
	1.37886	0.767223	3.40437	1.38348		-0.793352	-1.33955	-0.760102	-0.287786
	1.35551	0.756683	3.40888	1.42271		-0.761729	-1.27166	-0.68854	-0.333149
	1.34477	0.78395	3.36726	1.43721		-0.725213	-1.21038	-0.59973	-0.346402
	1.34713	0.755207	3.33906	1.42268		-0.701318	-1.27235	-0.586979	-0.289253
	1.3534	0.647555	3.3322	1.44811		-0.706827	-1.36056	-0.637529	-0.202555
	1.37904	0.590832	3.32456	1.41714		-0.727166	-1.40405	-0.640347	-0.2174
	1.4476	0.59749	3.34298	1.36504		-0.726199	-1.45951	-0.602489	-0.358322
	1.5282	0.607462	3.4178	1.33551		-0.698769	-1.47957	-0.606384	-0.486729
	1.56114	0.655508	3.51407	1.3402		-0.675208	-1.37564	-0.625592	-0.496396
	1.5477	0.730928	3.60508	1.39428		-0.670031	-1.2575	-0.626705	-0.430627
	1.53784	0.698156	3.6855	1.4929		-0.684484	-1.24103	-0.636359	-0.342307
	1.53457	0.579475	3.71763	1.58392		-0.714925	-1.24187	-0.632551	-0.248842
	1.51168	0.550915	3.68731	1.63328		-0.753191	-1.22774	-0.544125	-0.225059
	1.48175	0.601061	3.6526	1.67006		-0.783601	-1.28293	-0.424107	-0.300353
	1.448	0.643792	3.65675	1.70371		-0.805118	-1.35641	-0.351249	-0.377585
	1.40304	0.713498	3.68819	1.70095		-0.827911	-1.33171	-0.339114	-0.404736
	1.38486	0.806775	3.75627	1.66903		-0.834305	-1.27693	-0.390556	-0.463838
	1.39999	0.817943	3.87027	1.66919		-0.811526	-1.2671	-0.544944	-0.565825
	1.39493	0.785324	3.9745	1.69786		-0.782273	-1.22975	-0.729481	-0.656388
	1.35835	0.806383	4.0255	1.69455		-0.773002	-1.1916	-0.802577	-0.744718
	1.34431	0.810687	4.03678	1.68774		-0.775825	-1.27228	-0.767809	-0.832347
	1.36631	0.739289	4.0244	1.71272		-0.785984	-1.40238	-0.721951	-0.871892
	1.40567	0.695721	3.97549	1.74771		-0.799457	-1.44154	-0.672395	-0.923516
	1.46068	0.734366	3.92596	1.77167		-0.803876	-1.45167	-0.623587	-0.968314
	1.5031	0.760093	3.90532	1.77609		-0.804138	-1.478	-0.66648	-0.98078
	1.48939	0.774271	3.89496	1.70887		-0.826882	-1.42372	-0.782577	-0.938906
	1.4477	0.836312	3.87961	1.58484		-0.878289	-1.32085	-0.872023	-0.865919
	1.44584	0.860792	3.89581	1.51254		-0.921871	-1.31107	-0.953634	-0.867462
	1.4751	0.80294	3.96278	1.553		-0.928406	-1.35391	-1.05489	-0.876305
	1.47764	0.783765	4.05056	1.62941		-0.898972	-1.35484	-1.07318	-0.846504
	1.44948	0.837771	4.12663	1.65267		-0.853489	-1.39222	-0.993547	-0.79912
	1.41086	0.839909	4.16396	1.59257		-0.817754	-1.48326	-0.93157	-0.699237
	1.36804	0.796164	4.13729	1.47334		-0.81879	-1.50789	-0.910213	-0.570787
	1.35321	0.772032	4.06605	1.37142		-0.848794	-1.48567	-0.868952	-0.562323
	1.38745	0.720187	4.02119	1.37957		-0.863716	-1.5122	-0.856687	-0.696468
	1.42252	0.642205	4.04081	1.47285		-0.857965	-1.50383	-0.910519	-0.851316
	1.43003	0.635615	4.10704	1.53883		-0.856172	-1.39061	-0.967825	-0.972924
	1.44963	0.67221	4.19264	1.56305		-0.855974	-1.31401	-1.00673	-1.0869
	1.48561	0.642232	4.26809	1.60244		-0.838592	-1.31717	-1.06866	-1.14931
	1.50029	0.605772	4.29597	1.60536		-0.817274	-1.28288	-1.08758	-1.15156
	1.4957	0.637284	4.27878	1.51663		-0.806928	-1.2381	-1.01628	-1.17395
	1.49267	0.66476	4.26878	1.42546		-0.809055	-1.279	-0.949387	-1.2148
	1.48657	0.630488	4.28703	1.41273		-0.834034	-1.32646	-0.953931	-1.20287
	1.49117	0.603398	4.30447	1.48147		-0.869834	-1.32679	-0.941122	-1.16405
	1.53379	0.581502	4.30607	1.63301		-0.882129	-1.37695	-0.926397	-1.15164
	1.59429	0.502049	4.30201	1.81782		-0.852335	-1.43992	-0.990113	-1.14811
	1.61823	0.447953	4.28715	1.89785		-0.810947	-1.39035	-1.05504	-1.15621
	1.59779	0.488608	4.25425	1.84375		-0.780419	-1.29785	-1.03249	-1.23374
	1.558	0.517268	4.25202	1.76295		-0.762543	-1.29296	-0.986198	-1.32884
	1.50756	0.479894	4.28783	1.72961		-0.760722	-1.30932	-0.958794	-1.34664
	1.46219	0.486646	4.32102	1.72126		-0.767053	-1.29578	-0.909268	-1.30959
	1.46238	0.540894	4.32872	1.73735		-0.759975	-1.33714	-0.904651	-1.27083
	1.5019	0.57251	4.33565	1.7642		-0.739143	-1.40139	-1.00193	-1.18822
	1.53127	0.632489	4.32556	1.74164		-0.739028	-1.39372	-1.1142	-1.08559
	1.55343	0.720542	4.30002	1.66357		-0.754943	-1.38318	-1.20268	-1.06362
	1.5909	0.724077	4.30894	1.62197		-0.757342	-1.43145	-1.24571	-1.12598
	1.61713	0.639943	4.35404	1.62933		-0.754112	-1.42232	-1.24689	-1.18977
	1.60907	0.598416	4.39788	1.64162		-0.766135	-1.33618	-1.16533	-1.23857
	1.58542	0.58526	4.44492	1.66698		-0.78669	-1.32414	-1.09021	-1.284
	1.55904	0.525923	4.50603	1.69833		-0.801858	-1.38027	-1.12095	-1.31135
	1.53979	0.478816	4.5328	1.68393		-0.810583	-1.3898	-1.19241	-1.35779
	1.55926	0.483042	4.52769	1.66239		-0.803446	-1.39274	-1.23644	-1.42826
	1.6098	0.465102	4.55128	1.71003		-0.794017	-1.43092	-1.27064	-1.42772
	1.63901	0.429544	4.58865	1.79687		-0.805527	-1.40144	-1.30502	-1.27727
	1.63428	0.466053	4.58628	1.85981		-0.831086	-1.32003	-1.30327	-1.06651
	1.63739	0.500158	4.55381	1.90821		-0.837982	-1.31825	-1.3314	-0.938864
	1.66227	0.453197	4.52706	1.93307		-0.813029	-1.35466	-1.40797	-0.920825
	1.68141	0.43985	4.50145	1.89908		-0.782347	-1.32413	-1.43416	-0.980786
	1.69516	0.525859	4.4864	1.82708		-0.762992	-1.29481	-1.38117	-1.08167
	1.70559	0.587996	4.50366	1.75946		-0.767019	-1.32498	-1.34062	-1.11674
	1.68634	0.583788	4.50731	1.71135		-0.79838	-1.32469	-1.32582	-1.03429
	1.64401	0.573834	4.48452	1.69869		-0.833148	-1.30717	-1.29092	-0.942591
	1.62888	0.513499	4.47919	1.76895		-0.830467	-1.36638	-1.27618	-0.950854
	1.63025	0.423994	4.50453	1.90487		-0.796828	-1.43108	-1.30913	-1.01697
	1.61557	0.439522	4.52248	2.03484		-0.772537	-1.41182	-1.31405	-1.10364
	1.61762	0.54495	4.56884	2.10843		-0.767442	-1.40974	-1.25662	-1.20382
	1.65232	0.587791	4.69114	2.14484		-0.767875	-1.47043	-1.19383	-1.25553
	1.681	0.56206	4.84884	2.14919		-0.771615	-1.48617	-1.13827	-1.2265
	1.69896	0.556648	4.96985	2.12783		-0.771388	-1.4679	-1.06125	-1.19396
	1.7249	0.55103	5.01897	2.11854		-0.761154	-1.51365	-1.01013	-1.16714
	1.73672	0.557458	4.97904	2.12233		-0.768635	-1.56837	-1.02972	-1.07073
	1.72851	0.653692	4.87266	2.10591		-0.811254	-1.55559	-1.06362	-0.900419
	1.73829	0.787372	4.79033	2.11401		-0.85867	-1.55533	-1.11249	-0.71817
	1.76016	0.804546	4.79901	2.20355		-0.879916	-1.57319	-1.22058	-0.543292
	1.74909	0.742925	4.87071	2.33047		-0.877647	-1.49268	-1.33784	-0.42581
	1.70639	0.72357	4.95809	2.408		-0.867083	-1.36488	-1.35019	-0.459775
	1.6746	0.703223	5.03345	2.41331		-0.848533	-1.32621	-1.32672	-0.612999
	1.66621	0.654391	5.07046	2.32717		-0.82702	-1.34319	-1.34305	-0.768991
	1.67949	0.652427	5.05581	2.22506		-0.806005	-1.34454	-1.35664	-0.913601
	1.72415	0.666587	5.02575	2.11705		-0.778144	-1.39689	-1.36215	-1.09169
	1.76766	0.594967	5.01758	2.0635		-0.754886	-1.48378	-1.41828	-1.24821
	1.76125	0.514332	5.02559	2.0409		-0.773555	-1.4909	-1.48202	-1.35086
	1.72975	0.501474	5.05709	2.02171		-0.836258	-1.47688	-1.54973	-1.42694
	1.72239	0.485529	5.12366	2.06141		-0.892037	-1.54742	-1.61816	-1.4472
	1.72014	0.459513	5.19118	2.17946		-0.916465	-1.59483	-1.71616	-1.34208
	1.7094	0.515226	5.21624	2.30767		-0.911631	-1.52098	-1.74477	-1.1921
	1.71859	0.617955	5.22174	2.39877		-0.8835	-1.4411	-1.71357	-1.14575
	1.74153	0.662245	5.2377	2.45736		-0.852049	-1.40276	-1.71897	-1.22496
	1.74951	0.687353	5.24811	2.45441		-0.847425	-1.3544	-1.75093	-1.3845
	1.75324	0.727973	5.22391	2.39035		-0.855872	-1.36634	-1.7604	-1.58984
	1.75682	0.710135	5.18724	2.32772		-0.852487	-1.48636	-1.79046	-1.7664
	1.74112	0.645247	5.14697	2.28438		-0.854882	-1.57296	-1.83369	-1.85962
	1.7178	0.650372	5.10949	2.22725		-0.876688	-1.56099	-1.78818	-1.90904
	1.71696	0.710558	5.10832	2.20601		-0.903314	-1.56927	-1.68863	-1.94982
	1.72487	0.723897	5.17065	2.25792		-0.911706	-1.59356	-1.63449	-1.90175
	1.71334	0.741457	5.26772	2.33191		-0.900371	-1.52882	-1.5801	-1.77407
	1.70033	0.798058	5.35546	2.3839		-0.870321	-1.43845	-1.49906	-1.70002
	1.71632	0.803425	5.42091	2.43158		-0.828902	-1.42851	-1.49148	-1.71419
	1.75485	0.761887	5.45299	2.44734		-0.804017	-1.43959	-1.55491	-1.74141
	1.80486	0.78263	5.449	2.39454		-0.802869	-1.45268	-1.59291	-1.74249
	1.87292	0.815702	5.43913	2.33833		-0.807262	-1.55403	-1.62814	-1.68932
	1.93473	0.780348	5.43325	2.33224		-0.807302	-1.65699	-1.69595	-1.5285
	1.95083	0.757384	5.3904	2.32137		-0.816752	-1.61987	-1.71016	-1.33467
	1.93385	0.767546	5.31572	2.28556		-0.827297	-1.52782	-1.66023	-1.26322
	1.90542	0.726756	5.27119	2.2804		-0.825531	-1.48126	-1.61398	-1.32994
	1.8619	0.661151	5.23828	2.30081		-0.820466	-1.39757	-1.59497	-1.45893
	1.83115	0.683074	5.18535	2.31838		-0.818917	-1.29122	-1.57284	-1.61374
	1.84788	0.761112	5.14459	2.36263		-0.821512	-1.29797	-1.59697	-1.73815
	1.88411	0.825046	5.13745	2.4145		-0.830911	-1.36552	-1.65389	-1.75453
	1.89429	0.903639	5.12294	2.41101		-0.846915	-1.3805	-1.63801	-1.68425
	1.88802	0.976097	5.0885	2.39395		-0.842426	-1.39856	-1.55983	-1.61752
	1.88215	0.946272	5.08367	2.43806		-0.808804	-1.4482	-1.5537	-1.52601
	1.86906	0.859124	5.11487	2.51209		-0.77197	-1.42179	-1.6313	-1.37715
	1.85034	0.848536	5.18831	2.56357		-0.762219	-1.35207	-1.6915	-1.25844
	1.84826	0.864757	5.29813	2.63994		-0.786237	-1.36399	-1.73382	-1.24186
	1.85503	0.826621	5.39498	2.74295		-0.826726	-1.38537	-1.78458	-1.27753
	1.85013	0.816922	5.40853	2.81657		-0.862923	-1.32428	-1.80293	-1.3454
	1.86063	0.852611	5.3483	2.83953		-0.864935	-1.28645	-1.81291	-1.43088
	1.90263	0.843348	5.28077	2.80956		-0.830036	-1.32462	-1.86333	-1.45647
	1.93117	0.82871	5.2403	2.68905		-0.795563	-1.33904	-1.89618	-1.39833
	1.92423	0.889057	5.24693	2.58258		-0.787824	-1.3547	-1.85071	-1.39057
	1.90981	0.921823	5.32391	2.54382		-0.797836	-1.45563	-1.80816	-1.49105
	1.88388	0.886964	5.43486	2.5489		-0.822846	-1.54552	-1.82718	-1.61131
	1.84485	0.902741	5.49638	2.50696		-0.868049	-1.5387	-1.83528	-1.68929
	1.84384	0.970974	5.48588	2.4192		-0.904079	-1.52853	-1.80256	-1.69817
	1.87542	0.980449	5.4437	2.33047		-0.904955	-1.51838	-1.76363	-1.61973
	1.88478	0.951282	5.38401	2.25405		-0.878778	-1.39955	-1.71453	-1.51949
	1.8803	0.953558	5.33866	2.22408		-0.842767	-1.25742	-1.64244	-1.51111
	1.89784	0.942418	5.34781	2.28665		-0.804889	-1.22248	-1.64105	-1.57938
	1.91858	0.935967	5.40492	2.40221		-0.79086	-1.22284	-1.73744	-1.61947
	1.92567	1.03159	5.46733	2.49089		-0.810677	-1.19649	-1.83304	-1.63186
	1.93876	1.1814	5.51911	2.53717		-0.839179	-1.23154	-1.89005	-1.68028
	1.94591	1.23436	5.54533	2.56311		-0.86069	-1.31237	-1.96111	-1.75272
	1.92367	1.22081	5.51924	2.55568		-0.880546	-1.33341	-1.99935	-1.83318
	1.89218	1.23228	5.46675	2.5032		-0.903753	-1.3453	-1.97816	-1.93016
	1.87578	1.20545	5.45003	2.45463		-0.922201	-1.40788	-1.98798	-2.00889
	1.85316	1.13659	5.49726	2.42999		-0.943225	-1.4211	-2.04468	-2.03185
	1.82683	1.1278	5.56928	2.40789		-0.966705	-1.34481	-2.09015	-2.06523
	1.84209	1.13296	5.63469	2.39094		-0.970776	-1.31831	-2.05615	-2.13603
	1.89743	1.05465	5.66497	2.39421		-0.956526	-1.35786	-2.0494	-2.13319
	1.94497	0.996605	5.62661	2.38149		-0.960598	-1.34985	-2.0505	-1.97706
	1.97309	1.02641	5.5362	2.35103		-0.986509	-1.32611	-2.01702	-1.75068
	1.97842	1.02574	5.47892	2.34618		-0.996541	-1.34812	-1.97592	-1.55387
	1.93809	0.970285	5.48452	2.35821		-0.986771	-1.33119	-1.9151	-1.46627
	1.88217	0.94153	5.52008	2.33426		-0.96602	-1.27006	-1.81523	-1.53283
	1.86911	0.922523	5.57935	2.30839		-0.931004	-1.29435	-1.77335	-1.70753
	1.88477	0.87503	5.67323	2.33188		-0.89947	-1.37166	-1.86408	-1.85068
	1.89278	0.88675	5.78058	2.38379		-0.901119	-1.39444	-1.98753	-1.93179
	1.90003	0.965564	5.87804	2.43095		-0.926668	-1.42787	-2.05048	-2.01965
	1.91153	0.983897	5.93265	2.46498		-0.960853	-1.52243	-2.08513	-2.09319
	1.91419	0.924813	5.88805	2.44064		-1.00884	-1.56063	-2.1331	-2.07742
	1.917	0.895113	5.7521	2.33408		-1.06061	-1.50988	-2.06063	-1.98986
	1.93158	0.889086	5.63066	2.2478		-1.10497	-1.48589	-1.97591	-1.88319
	1.93811	0.86114	5.59312	2.26398		-1.14238	-1.47324	-1.95412	-1.77295
	1.9169	0.899801	5.6015	2.30115		-1.16666	-1.3978	-1.92008	-1.72888
	1.89213	1.00089	5.60002	2.2933		-1.15328	-1.3523	-1.87256	-1.80058
	1.88948	1.03032	5.61313	2.25207		-1.10198	-1.40759	-1.87447	-1.8921
	1.89171	1.00194	5.65865	2.20476		-1.05985	-1.45602	-1.89253	-1.90891
	1.89046	1.0341	5.72078	2.16282		-1.04881	-1.4667	-1.85334	-1.90865
	1.90148	1.08181	5.78409	2.18073		-1.04451	-1.52751	-1.82415	-1.95732
	1.91746	1.08825	5.82493	2.24881		-1.02416	-1.57833	-1.87862	-2.0216
	1.91562	1.12829	5.8163	2.23225		-0.99619	-1.54043	-1.88513	-2.07216
	1.90301	1.18029	5.78954	2.19152		-0.966237	-1.51042	-1.86887	-2.09979
	1.87431	1.15827	5.81692	2.1825		-0.949461	-1.51235	-1.86853	-2.05235
	1.82315	1.12296	5.8612	2.23006		-0.961363	-1.42364	-1.8777	-1.95264
	1.79638	1.16345	5.87079	2.31115		-0.980845	-1.29543	-1.89352	-1.89953
	1.83751	1.21393	5.84891	2.42796		-0.986844	-1.2893	-1.96265	-1.92952
	1.91335	1.21674	5.79893	2.52003		-0.987678	-1.35936	-2.08357	-1.96109
	1.97049	1.23982	5.70795	2.51366		-0.998388	-1.39685	-2.04632	-1.98399
	1.99817	1.26998	5.62184	2.43207		-1.00345	-1.44213	-1.88729	-2.05197
	1.99195	1.22466	5.58466	2.33896		-0.985921	-1.49412	-1.74916	-2.14592
	1.93842	1.15663	5.56584	2.2155		-0.948487	-1.45469	-1.69675	-2.20554
	1.86487	1.1746	5.55234	2.05945		-0.906731	-1.3869	-1.68784	-2.21831
	1.82389	1.19683	5.57246	1.97067		-0.885174	-1.41816	-1.71654	-2.16609
	1.82288	1.15744	5.61743	1.99073		-0.894752	-1.47813	-1.75443	-2.05488
	1.83472	1.15302	5.64722	2.04508		-0.92865	-1.48374	-1.71247	-1.99686
	1.86489	1.18395	5.64592	2.07859		-0.950654	-1.52506	-1.62991	-2.06604
	1.90435	1.16262	5.63068	2.07823		-0.941852	-1.61662	-1.61472	-2.15659
	1.91183	1.14303	5.60514	2.02722		-0.925798	-1.64257	-1.67025	-2.16654
	1.90093	1.18969	5.59972	1.97254		-0.929564	-1.63305	-1.74143	-2.14087
	1.91673	1.21139	5.64641	2.00803		-0.946198	-1.65993	-1.846	-2.12837
	1.9447	1.21007	5.72001	2.11266		-0.975678	-1.63446	-1.94539	-2.12403
	1.96524	1.27144	5.75947	2.20351		-1.01208	-1.5333	-1.96946	-2.15383
	2.01243	1.33415	5.75664	2.28338		-1.032	-1.51569	-1.95167	-2.22688
	2.07258	1.30057	5.74372	2.35816		-1.03588	-1.60662	-1.98268	-2.25752
	2.09817	1.24492	5.73747	2.37883		-1.03685	-1.67479	-2.02024	-2.19935
	2.09801	1.2556	5.76574	2.32231		-1.02651	-1.73133	-1.98606	-2.10247
	2.08924	1.26543	5.82872	2.25618		-0.989984	-1.80983	-1.92242	-1.98496
	2.04753	1.25343	5.8854	2.20738		-0.948864	-1.80967	-1.87755	-1.84024
	1.98551	1.27823	5.90433	2.15899		-0.932819	-1.71766	-1.82282	-1.77886
	1.95199	1.29372	5.91748	2.11543		-0.940463	-1.6778	-1.80859	-1.85733
	1.94505	1.23642	5.94316	2.08495		-0.96041	-1.67803	-1.88985	-1.98243
	1.93392	1.19089	5.95527	2.02811		-0.983474	-1.60214	-1.96684	-2.08634
	1.92292	1.20718	5.92817	1.94164		-0.997799	-1.52458	-1.96043	-2.18742
	1.9181	1.17817	5.88507	1.8808		-0.992688	-1.53626	-1.96673	-2.24628
	1.89734	1.1065	5.86546	1.85714		-0.98848	-1.54884	-2.00835	-2.23243
	1.87035	1.1024	5.89305	1.8601		-1.00104	-1.52692	-2.0003	-2.19861
	1.8823	1.13083	5.97049	1.93705		-1.00698	-1.57327	-1.95904	-2.17934
	1.91578	1.11042	6.08027	2.06281		-0.9971	-1.64233	-1.94549	-2.12141
	1.9225	1.12412	6.15003	2.11575		-1.00167	-1.62223	-1.92302	-2.02882
	1.91242	1.17957	6.13346	2.07561		-1.03001	-1.59951	-1.89913	-1.96163
	1.90782	1.15628	6.08498	2.03222		-1.05504	-1.64319	-1.94354	-1.91557
	1.89382	1.08434	6.06785	2.01199		-1.07612	-1.65214	-2.0239	-1.8667
	1.88419	1.06928	6.09137	1.98932		-1.0868	-1.61771	-2.04812	-1.86801
	1.90319	1.0871	6.14942	1.98284		-1.07558	-1.64287	-2.0781	-1.92684
	1.91892	1.08154	6.18762	1.97681		-1.06318	-1.65692	-2.16209	-1.9674
	1.90496	1.11868	6.14765	2.0595		-1.07211	-1.578	-2.21047	-1.99062
	1.88287	1.17673	6.05486	2.19072		-1.08326	-1.53724	-2.18845	-2.0483
	1.85608	1.23655	5.99852	2.36198		-1.07769	-1.60416	-2.15304	-2.10613
	1.80474	1.26038	5.9911	2.494		-1.08244	-1.64956	-2.10264	-2.13227
	1.75533	1.32812	5.99276	2.52973		-1.10562	-1.63598	-1.99936	-2.19547
	1.74479	1.36948	6.00275	2.52132		-1.13169	-1.65354	-1.94144	-2.308
	1.76039	1.30928	6.02281	2.524		-1.15388	-1.65777	-1.99229	-2.37504
	1.76985	1.26774	6.02801	2.50491		-1.17365	-1.59491	-2.05002	-2.34622
	1.77638	1.28352	6.00817	2.46946		-1.17889	-1.56655	-2.06781	-2.23693
	1.78366	1.26811	6.00053	2.45623		-1.16474	-1.6012	-2.0949	-2.0387
	1.77695	1.25167	5.99555	2.4534		-1.1558	-1.59992	-2.1039	-1.81513
	1.77067	1.28643	6.00057	2.44992		-1.15464	-1.60503	-2.08576	-1.66849
	1.79133	1.2779	6.07543	2.4903		-1.14337	-1.71299	-2.11305	-1.62092
	1.8182	1.20021	6.20994	2.52142		-1.11982	-1.7983	-2.18055	-1.60715
	1.83559	1.20057	6.28748	2.45917		-1.10034	-1.7497	-2.18532	-1.63
	1.87264	1.28089	6.25209	2.35398		-1.0865	-1.68002	-2.14585	-1.71193
	1.92352	1.33545	6.16698	2.29466		-1.08043	-1.66054	-2.12801	-1.80905
	1.93968	1.37173	6.09287	2.21895		-1.09824	-1.62493	-2.1212	-1.86719
	1.91635	1.42811	6.09258	2.22426		-1.11722	-1.60968	-2.11034	-1.8975
	1.87786	1.43093	6.20527	2.25807		-1.11902	-1.66917	-2.12736	-1.90005
	1.83688	1.3773	6.33225	2.28928		-1.11087	-1.69547	-2.15115	-1.85555
	1.81679	1.38355	6.34806	2.31362		-1.10789	-1.65176	-2.11523	-1.82496
	1.85314	1.42684	6.2709	2.37966		-1.10544	-1.65859	-2.08009	-1.87634
	1.92228	1.41834	6.21119	2.48794		-1.10325	-1.71736	-2.13204	-1.96078
	1.95725	1.42729	6.19586	2.57206		-1.10988	-1.70832	-2.22297	-1.99937
	1.94345	1.53487	6.19354	2.59962		-1.12023	-1.66675	-2.25598	-2.02562
	1.91854	1.61677	6.15054	2.59426		-1.11967	-1.69124	-2.26073	-2.03622
	1.89944	1.6121	6.03622	2.5526		-1.11449	-1.73201	-2.25779	-2.01285
	1.8834	1.63814	5.90753	2.44302		-1.1162	-1.76396	-2.22766	-2.00485
	1.8908	1.6861	5.88454	2.302		-1.11945	-1.86777	-2.2253	-2.04297
	1.90744	1.68159	6.00685	2.16283		-1.12288	-1.9788	-2.30044	-2.05191
	1.8949	1.6967	6.17967	2.01844		-1.13904	-1.94667	-2.37132	-1.99866
	1.87739	1.75228	6.30882	1.9024		-1.16143	-1.85641	-2.37722	-1.9408
	1.89156	1.71364	6.36732	1.90853		-1.1729	-1.84417	-2.36167	-1.91706
	1.90482	1.60643	6.36865	2.02771		-1.17964	-1.8391	-2.3511	-1.90262
	1.90153	1.56422	6.34337	2.19282		-1.18643	-1.7928	-2.2927	-1.91631
	1.91605	1.55212	6.3475	2.37779		-1.17025	-1.78817	-2.26763	-1.95065
	1.93915	1.51623	6.39077	2.56612		-1.13367	-1.81161	-2.31566	-1.92116
	1.94846	1.52599	6.43443	2.70216		-1.10335	-1.79497	-2.36335	-1.78253
	1.9725	1.59008	6.46364	2.75836		-1.09351	-1.82198	-2.36383	-1.61942
	2.01388	1.60054	6.48086	2.72617		-1.103	-1.91753	-2.39525	-1.4735
	2.02919	1.58688	6.46806	2.61972		-1.12711	-1.93707	-2.47164	-1.32906
	2.01853	1.64815	6.43249	2.4704		-1.15161	-1.8503	-2.51194	-1.33735
	2.02039	1.71453	6.42298	2.36653		-1.16028	-1.78576	-2.52234	-1.47419
	2.03032	1.68496	6.4806	2.33951		-1.16257	-1.74928	-2.56281	-1.65259
	2.03006	1.64396	6.58569	2.31204		-1.17312	-1.67545	-2.5912	-1.80264
	2.0393	1.65961	6.68983	2.24494		-1.19053	-1.65221	-2.57826	-1.89717
	2.07268	1.65553	6.74861	2.19623		-1.20294	-1.71719	-2.58224	-1.86887
	2.096	1.65222	6.73778	2.17511		-1.22351	-1.74189	-2.57257	-1.73547
	2.08632	1.70141	6.66513	2.15485		-1.25873	-1.71033	-2.50124	-1.65124
	2.06049	1.70764	6.60613	2.18573		-1.27954	-1.74351	-2.43572	-1.67471
	2.01531	1.63273	6.61571	2.26097		-1.26737	-1.79393	-2.42896	-1.68792
	1.95749	1.61968	6.6576	2.28022		-1.23481	-1.76046	-2.39916	-1.63028
	1.93447	1.69432	6.67548	2.22456		-1.19239	-1.74504	-2.34823	-1.5455
	1.95552	1.73977	6.67257	2.1543		-1.14433	-1.80195	-2.37022	-1.42655
	1.9793	1.76077	6.65552	2.04061		-1.11933	-1.81854	-2.46351	-1.27118
	2.00461	1.808	6.63043	1.89422		-1.11962	-1.79174	-2.55098	-1.14275
	2.04671	1.82988	6.63697	1.82576		-1.13621	-1.80945	-2.63276	-1.04665
	2.0823	1.7996	6.66401	1.88062		-1.14549	-1.79602	-2.68284	-0.959674
	2.09776	1.80799	6.66058	1.97987		-1.17042	-1.69989	-2.61928	-0.923483
	2.11394	1.84348	6.63479	2.1087		-1.18579	-1.65952	-2.48079	-0.979198
	2.12702	1.80806	6.6443	2.25437		-1.17321	-1.70038	-2.40425	-1.03912
	2.114	1.76139	6.63835	2.36369		-1.14621	-1.69029	-2.3977	-1.08005
	2.08828	1.81007	6.69829	2.41298		-1.10992	-1.64096	-2.43288	-1.18054
	2.07662	1.88907	6.74332	2.46541		-1.07004	-1.66016	-2.45329	-1.34911
	2.06969	1.91099	6.74137	2.52089		-1.0465	-1.68586	-2.4886	-1.48442
	2.05582	1.94475	6.66264	2.50798		-1.05112	-1.65791	-2.4619	-1.55829
	2.05822	1.96714	6.54184	2.42474		-1.07082	-1.67519	-2.45483	-1.57691
	2.08913	1.9005	6.46347	2.33319		-1.09006	-1.72959	-2.56786	-1.53381
	2.12513	1.84133	6.44231	2.26052		-1.11827	-1.68962	-2.72251	-1.48087
	2.16277	1.86637	6.44858	2.26154		-1.14543	-1.60439	-2.8261	-1.46709
	2.20182	1.87065	6.49204	2.38054		-1.15282	-1.59704	-2.89078	-1.42818
	2.20402	1.821	6.55123	2.50157		-1.13612	-1.59277	-2.91265	-1.31581
	2.1581	1.83821	6.59372	2.49865		-1.10256	-1.55014	-2.8394	-1.22708
	2.12108	1.91199	6.63407	2.44058		-1.054	-1.57586	-2.72346	-1.25988
	2.12048	1.96525	6.69897	2.41502		-1.01249	-1.62606	-2.62467	-1.36325
	2.13219	2.03308	6.73449	2.40604		-1.00724	-1.56181	-2.52723	-1.44799
	2.14642	2.12368	6.72687	2.41236		-1.02001	-1.46491	-2.42526	-1.47507
	2.15015	2.12008	6.73414	2.45851		-1.02781	-1.46056	-2.39109	-1.42874
	2.11924	2.01611	6.75866	2.53138		-1.03193	-1.46848	-2.43489	-1.33456
	2.07227	1.96565	6.75729	2.60314		-1.04107	-1.44868	-2.49099	-1.28946
	2.06285	1.98192	6.71992	2.67576		-1.05339	-1.48279	-2.56632	-1.32673
	2.08464	1.99731	6.66363	2.69514		-1.06464	-1.53215	-2.68068	-1.3495
	2.09113	2.05414	6.60001	2.65322		-1.06954	-1.50655	-2.73954	-1.31224
	2.08637	2.1534	6.58233	2.57459		-1.05407	-1.50164	-2.69399	-1.26768
	2.09917	2.15322	6.64208	2.53428		-1.02702	-1.59076	-2.63103	-1.22984
	2.11515	2.06071	6.7248	2.50711		-1.02048	-1.64516	-2.59751	-1.17172
	2.11959	2.03127	6.75818	2.45645		-1.04418	-1.62161	-2.54915	-1.13636
	2.13562	2.03211	6.74128	2.43177		-1.06065	-1.62816	-2.53156	-1.1261
	2.15114	2.00169	6.71115	2.48506		-1.05037	-1.64787	-2.55916	-1.09801
	2.13594	2.03803	6.6749	2.57532		-1.03264	-1.59735	-2.53458	-1.05667
	2.1305	2.15294	6.64419	2.65991		-1.01525	-1.57121	-2.42512	-1.05355
	2.16181	2.19077	6.64052	2.72079		-0.994096	-1.62129	-2.32855	-1.07161
	2.1787	2.15415	6.64078	2.72562		-0.97992	-1.63565	-2.28453	-1.09735
	2.15878	2.12802	6.63968	2.68393		-0.974968	-1.6269	-2.27186	-1.15936
	2.13438	2.07752	6.66787	2.66892		-0.958318	-1.70449	-2.32195	-1.24797
	2.09659	1.99072	6.72154	2.69086		-0.943229	-1.79711	-2.42495	-1.28384
	2.03901	1.95624	6.74165	2.68796		-0.950924	-1.8087	-2.46978	-1.25146
	2.00319	1.96785	6.73111	2.65323		-0.970055	-1.83383	-2.4197	-1.21278
	1.99833	1.92462	6.73893	2.62965		-0.987319	-1.90813	-2.37443	-1.17942
	2.00169	1.87824	6.79001	2.62499		-0.998726	-1.91798	-2.34975	-1.14109
	2.02458	1.92411	6.88467	2.61624		-1.01206	-1.86805	-2.29202	-1.15456
	2.07157	1.99568	7.01098	2.60681		-1.01843	-1.87054	-2.24522	-1.22766
	2.09397	2.02789	7.10422	2.60296		-1.02535	-1.89533	-2.24862	-1.30492
	2.06784	2.09825	7.09198	2.5996		-1.03345	-1.87901	-2.22031	-1.39232
	2.03726	2.1897	6.98463	2.61502		-1.02389	-1.91011	-2.16564	-1.51392
	2.03619	2.17864	6.86281	2.69586		-0.992367	-1.98891	-2.1585	-1.57184
	2.04946	2.12703	6.78393	2.79605		-0.977527	-1.97612	-2.15054	-1.49277
	2.07379	2.13626	6.74894	2.85561		-0.996917	-1.89079	-2.0782	-1.37034
	2.11495	2.12775	6.75173	2.90495		-1.01686	-1.87334	-2.03427	-1.29718
	2.14357	2.04584	6.76401	2.96216		-1.01902	-1.88489	-2.06322	-1.30164
	2.14614	1.97367	6.75006	2.93723		-1.00726	-1.85189	-2.08581	-1.39444
	2.16009	1.91875	6.73718	2.83071		-0.982678	-1.85278	-2.07025	-1.55437
	2.18989	1.83881	6.78249	2.72129		-0.954997	-1.87366	-2.05303	-1.6619
	2.20476	1.82643	6.86147	2.6557		-0.953297	-1.8178	-2.01382	-1.65534
	2.20924	1.90221	6.93539	2.6504		-0.965596	-1.75937	-1.97468	-1.57839
	2.21286	1.93834	7.01514	2.71364		-0.965661	-1.8078	-2.01078	-1.45689
	2.19916	1.89534	7.09145	2.7616		-0.968858	-1.86035	-2.10005	-1.26965
	2.17674	1.8917	7.13203	2.72879		-0.991665	-1.82928	-2.10608	-1.0969
	2.17013	1.93644	7.13659	2.69291		-1.03159	-1.81079	-2.04301	-1.04627
	2.16809	1.95208	7.11674	2.7452		-1.07498	-1.83177	-2.01943	-1.08266
	2.15081	1.97683	7.05946	2.84766		-1.10842	-1.81822	-2.0128	-1.15607
	2.13809	2.04356	6.9833	2.91592		-1.10633	-1.82322	-1.9642	-1.27777
	2.14674	2.06132	6.9595	2.95315		-1.07326	-1.91306	-1.90272	-1.38671
	2.15643	2.00559	6.99641	2.97227		-1.05083	-1.96814	-1.84339	-1.4271
	2.1503	1.98014	7.05531	2.95763		-1.05866	-1.93463	-1.76515	-1.49895
	2.15149	1.94503	7.10066	2.9654		-1.07177	-1.93877	-1.76731	-1.66389
	2.17309	1.82549	7.13264	3.05022		-1.06169	-1.98781	-1.89732	-1.79424
	2.19278	1.72949	7.12323	3.13055		-1.03499	-1.9741	-2.0333	-1.79508
	2.21337	1.73417	7.075	3.12925		-0.998194	-1.9508	-2.08735	-1.68429
	2.24467	1.77597	7.05627	3.06856		-0.963988	-1.99592	-2.0909	-1.52355
	2.26	1.84712	7.07751	2.96425		-0.953983	-2.01221	-2.0522	-1.41275
	2.25084	1.99114	7.10189	2.84482		-0.964635	-1.982	-1.96719	-1.44127
	2.25029	2.09774	7.13269	2.82968		-0.965391	-2.0114	-1.9042	-1.54518
	2.25569	2.08527	7.17223	2.9135		-0.944764	-2.05585	-1.90002	-1.56739
	2.24573	2.06984	7.16044	2.97691		-0.92251	-2.00962	-1.87184	-1.51688
	2.24264	2.12284	7.09892	2.95676		-0.899463	-1.94749	-1.7911	-1.53351
	2.26146	2.15566	7.04985	2.89151		-0.879575	-1.94375	-1.74031	-1.64397
	2.27396	2.14055	7.02817	2.8104		-0.875315	-1.90019	-1.76913	-1.69376
	2.27005	2.15598	7.04011	2.77915		-0.885791	-1.81464	-1.80529	-1.6002
	2.27279	2.16004	7.08962	2.85959		-0.895479	-1.81397	-1.83608	-1.38919
	2.2768	2.1047	7.12727	3.0203		-0.896843	-1.872	-1.8688	-1.12457
	2.26076	2.07188	7.10779	3.16463		-0.89313	-1.88754	-1.85959	-0.942056
	2.25098	2.07671	7.07741	3.2627		-0.875036	-1.92601	-1.81597	-0.934623
	2.2665	2.00636	7.11597	3.35035		-0.841742	-2.02279	-1.82799	-0.9771
	2.27876	1.89619	7.22734	3.42079		-0.847435	-2.0495	-1.85897	-0.968339
	2.28419	1.86302	7.35781	3.43619		-0.820242	-2.00462	-1.80874	-0.964116
	2.31892	1.84153	7.44477	3.42867		-0.810345	-2.00452	-1.73432	-0.997063
	2.35806	1.79428	7.47205	3.41614		-0.818882	-2.0007	-1.70844	-0.996788
	2.35527	1.82417	7.45342	3.37447		-0.842242	-1.92319	-1.68393	-0.972316
	2.33807	1.92604	7.45249	3.33453		-0.859726	-1.90126	-1.64039	-0.978431
	2.32761	1.97429	7.51994	3.3335		-0.866288	-1.97439	-1.61384	-0.992314
	2.29508	1.99448	7.60265	3.33259		-0.874424	-2.00376	-1.55163	-0.983329
	2.25225	2.06047	7.60311	3.31459		-0.876234	-1.99806	-1.41883	-0.960207
	2.23003	2.09493	7.53268	3.33612		-0.85074	-2.05872	-1.3071	-0.887404
	2.20597	2.06698	7.46971	3.37292		-0.821943	-2.12181	-1.27568	-0.749419
	2.17763	2.0683	7.46013	3.36584		-0.826262	-2.11086	-1.25027	-0.623903
	2.17937	2.1019	7.50631	3.33465		-0.863487	-2.12247	-1.20264	-0.57459
	2.19896	2.07962	7.54994	3.34815		-0.918468	-2.1809	-1.18634	-0.525972
	2.20242	2.04666	7.51122	3.40309		-0.982095	-2.18335	-1.18775	-0.419997
	2.21059	2.06531	7.40865	3.4918		-1.0314	-2.16151	-1.17113	-0.300134
	2.25028	2.05132	7.36584	3.60326		-1.03188	-2.20951	-1.20976	-0.255949
	2.29582	1.98926	7.43919	3.70378		-0.995942	-2.25224	-1.294	-0.286191
	2.32184	2.00408	7.54479	3.73936		-0.963111	-2.22753	-1.2957	-0.39254
	2.34122	2.0883	7.5827	3.73443		-0.951514	-2.25139	-1.21533	-0.511757
	2.34856	2.11071	7.5443	3.73102		-0.9563	-2.32729	-1.22614	-0.490128
	2.32458	2.11891	7.48553	3.70711		-0.984428	-2.32868	-1.20481	-0.326236
	2.29851	2.1817	7.45682	3.69137		-1.02514	-2.29293	-1.18786	-0.175704
	2.30479	2.21325	7.47489	3.70428		-1.05101	-2.30435	-1.22355	-0.103827
	2.31635	2.19092	7.48828	3.72441		-1.07254	-2.27859	-1.27664	-0.0714268
	2.31643	2.18771	7.43716	3.67659		-1.09751	-2.2012	-1.25059	-0.0816778
	2.32674	2.14418	7.38357	3.58126		-1.10155	-2.21976	-1.18571	-0.118387
	2.33554	1.99476	7.41248	3.5082		-1.07711	-2.3158	-1.14992	-0.113993
	2.317	1.87413	7.47945	3.47307		-1.06187	-2.33878	-1.08981	-0.0677606
	2.29871	1.87169	7.44923	3.49307		-1.06571	-2.30061	-0.990708	-0.044501
	2.29874	1.90453	7.4017	3.57918		-1.07137	-2.27543	-0.934449	-0.0517112
	2.29928	1.93675	7.3108	3.65103		-1.08094	-2.20466	-0.936037	-0.0817048
	2.30912	2.0273	7.25307	3.63864		-1.09115	-2.09014	-0.924101	-0.15647
	2.34255	2.11412	7.29874	3.59753		-1.10001	-2.05851	-0.93968	-0.253886
	2.37006	2.10614	7.40934	3.61648		-1.124	-2.09138	-1.0532	-0.275863
	2.36145	2.08144	7.46312	3.69972		-1.17345	-2.10251	-1.1957	-0.242029
	2.34042	2.08336	7.42442	3.82844		-1.21247	-2.16753	-1.30712	-0.251649
	2.33574	2.02415	7.3651	3.97557		-1.21067	-2.33781	-1.43087	-0.279635
	2.33677	1.92668	7.33662	4.06993		-1.20911	-2.47691	-1.54904	-0.257875
	2.32427	1.91635	7.34934	4.03306		-1.20064	-2.52976	-1.60251	-0.235506
	2.30521	1.94202	7.39287	3.93555		-1.17948	-2.59209	-1.62223	-0.240745
	2.28644	1.91883	7.42652	3.86545		-1.13624	-2.62387	-1.62323	-0.210851
	2.27476	1.92379	7.38267	3.81922		-1.09751	-2.53983	-1.53624	-0.144242
	2.30362	1.95732	7.26042	3.77097		-1.08039	-2.45174	-1.41037	-0.0680989
	2.37214	1.91503	7.15263	3.74477		-1.09563	-2.45607	-1.34536	0.00356488
	2.41806	1.83147	7.0984	3.7063		-1.14531	-2.46365	-1.3364	0.0255528
	2.41669	1.81884	7.06839	3.65647		-1.19783	-2.47339	-1.31066	-0.0744452
	2.40458	1.82986	7.05432	3.65486		-1.21917	-2.56568	-1.31187	-0.251178
	2.39703	1.8293	7.05127	3.68821		-1.21151	-2.66618	-1.37348	-0.369792
	2.38866	1.89634	7.03224	3.68521		-1.19976	-2.67644	-1.44408	-0.382729
	2.39805	2.001	7.01536	3.66864		-1.18235	-2.66718	-1.4969	-0.353531
	2.41702	2.02331	7.0102	3.68149		-1.16086	-2.68355	-1.56815	-0.285173
	2.4185	2.00335	6.95106	3.68385		-1.1476	-2.6409	-1.64935	-0.164061
	2.41728	2.04901	6.84474	3.62762		-1.14716	-2.57753	-1.70891	-0.0652533
	2.45127	2.09156	6.7584	3.56062		-1.16266	-2.61355	-1.79583	-0.0455124
	2.50456	2.07837	6.72414	3.54131		-1.20261	-2.69546	-1.90954	-0.0442185
	2.53389	2.097	6.7132	3.56382		-1.2583	-2.7297	-1.93825	-0.120447
	2.54775	2.14077	6.71053	3.59547		-1.29189	-2.78707	-1.86933	-0.196664
	2.55755	2.1155	6.71478	3.6051		-1.29016	-2.87605	-1.81091	-0.292016
	2.53901	2.0776	6.72616	3.5608		-1.2779	-2.85749	-1.77489	-0.417582
	2.50532	2.11051	6.7648	3.4804		-1.27363	-2.74843	-1.71818	-0.626302
	2.50191	2.12889	6.84058	3.47328		-1.26568	-2.66649	-1.68365	-0.833888
	2.5057	2.11904	6.92103	3.54842		-1.25072	-2.5641	-1.68892	-0.906258
	2.48445	2.1867	6.94764	3.58135		-1.23764	-2.40351	-1.69659	-0.848816
	2.47335	2.29355	6.91307	3.62533		-1.2208	-2.33361	-1.76207	-0.751566
	2.48203	2.32414	6.86199	3.66918		-1.20438	-2.39704	-1.92809	-0.649405
	2.47751	2.33104	6.80264	3.68445		-1.20657	-2.46624	-2.09554	-0.565543
	2.47223	2.3815	6.73674	3.67474		-1.23084	-2.52778	-2.16507	-0.546704
	2.4835	2.40034	6.7015	3.69282		-1.25607	-2.61702	-2.19368	-0.557294
	2.48438	2.38656	6.70566	3.71497		-1.27686	-2.64136	-2.22211	-0.526479
	2.48074	2.41345	6.71522	3.66082		-1.29353	-2.56323	-2.21019	-0.508045
	2.5097	2.43406	6.7166	3.57575		-1.2932	-2.51918	-2.16198	-0.554033
	2.54601	2.37768	6.69935	3.51843		-1.28953	-2.52119	-2.15381	-0.623518
	2.54842	2.33954	6.64288	3.48		-1.30405	-2.45021	-2.16413	-0.674319
	2.53154	2.37394	6.58198	3.44135		-1.33029	-2.35527	-2.17099	-0.739474
	2.52544	2.37006	6.58602	3.42255		-1.33327	-2.34336	-2.23213	-0.786319
	2.52429	2.30051	6.65616	3.41472		-1.31607	-2.3508	-2.32316	-0.761445
	2.5287	2.27442	6.71749	3.40935		-1.30532	-2.33839	-2.32576	-0.742101
	2.55491	2.2917	6.72677	3.43021		-1.30729	-2.40751	-2.26664	-0.777484
	2.58168	2.2814	6.70802	3.46587		-1.31854	-2.50451	-2.24589	-0.799746
	2.5743	2.3041	6.70471	3.44377		-1.34679	-2.4898	-2.24137	-0.813426
	2.5565	2.36967	6.73317	3.372		-1.42615	-2.43112	-2.22942	-0.891108
	2.56023	2.37344	6.81417	3.34876		-1.42606	-2.42318	-2.24654	-0.978505
	2.56259	2.33288	6.90895	3.38787		-1.41483	-2.38509	-2.2509	-1.01208
	2.55509	2.34206	6.95176	3.42339		-1.41672	-2.30612	-2.1832	-1.01431
	2.5591	2.3596	6.9447	3.46252		-1.42323	-2.31135	-2.13783	-1.00314
	2.56321	2.32688	6.92044	3.53717		-1.43056	-2.35464	-2.20861	-0.91096
	2.55176	2.35117	6.86263	3.60907		-1.45006	-2.31432	-2.36334	-0.739434
	2.55618	2.48267	6.77604	3.69153		-1.46468	-2.25831	-2.41752	-0.578922
	2.5872	2.6094	6.72344	3.79487		-1.4518	-2.26003	-2.4232	-0.4618
	2.61703	2.67579	6.7132	3.84611		-1.43009	-2.22948	-2.38704	-0.418728
	2.64556	2.7106	6.71252	3.78063		-1.41332	-2.163	-2.31193	-0.494085
	2.68965	2.65982	6.73094	3.67949		-1.40425	-2.17845	-2.27426	-0.626877
	2.72523	2.50662	6.7617	3.62181		-1.40789	-2.22629	-2.3164	-0.664121
	2.71574	2.41071	6.76998	3.62343		-1.43348	-2.21527	-2.33293	-0.602671
	2.6743	2.42371	6.76859	3.67437		-1.46455	-2.23425	-2.31426	-0.565056
	2.63299	2.4378	6.80465	3.74806		-1.48176	-2.3185	-2.33811	-0.575852
	2.59807	2.44495	6.84488	3.75673		-1.48547	-2.32817	-2.39501	-0.59675
	2.58097	2.52805	6.84708	3.69668		-1.46702	-2.27034	-2.41655	-0.627017
	2.59551	2.61404	6.84924	3.65473		-1.42383	-2.28177	-2.43574	-0.621831
	2.60925	2.62638	6.88652	3.65514		-1.38192	-2.30569	-2.4418	-0.531768
	2.58801	2.65488	6.90781	3.63162		-1.37266	-2.25629	-2.36148	-0.430221
	2.56742	2.70297	6.86408	3.5955		-1.3787	-2.23216	-2.24721	-0.400429
	2.57072	2.6742	6.78222	3.60228		-1.37988	-2.2669	-2.21254	-0.383455
	2.56865	2.60328	6.67032	3.64322		-1.38386	-2.26281	-2.25515	-0.347201
	2.55876	2.58473	6.5717	3.67144		-1.38937	-2.25556	-2.27337	-0.35526
	2.56294	2.56774	6.55304	3.71183		-1.38743	-2.3195	-2.29799	-0.442665
	2.56295	2.5314	6.606	3.6758		-1.37269	-2.34697	-2.32746	-0.531053
	2.54877	2.56763	6.65553	3.52516		-1.34877	-2.27068	-2.33797	-0.563201
	2.56035	2.63092	6.70347	3.34676		-1.31766	-2.21579	-2.37106	-0.552441
	2.60253	2.60176	6.77769	3.24662		-1.29866	-2.22471	-2.46021	-0.523093
	2.63197	2.53125	6.81706	3.26389		-1.30607	-2.1909	-2.53444	-0.545891
	2.63973	2.51421	6.76843	3.36769		-1.32097	-2.13825	-2.52552	-0.701982
	2.64942	2.48044	6.65367	3.49676		-1.322	-2.14954	-2.49458	-0.867735
	2.65765	2.41634	6.52439	3.55986		-1.31764	-2.14436	-2.48424	-0.846483
	2.65719	2.4358	6.45405	3.55244		-1.32974	-2.08731	-2.4351	-0.667701
	2.67129	2.50782	6.49953	3.55371		-1.35313	-2.10017	-2.38353	-0.523447
	2.68686	2.52121	6.63877	3.62982		-1.38605	-2.16937	-2.4123	-0.496389
	2.65947	2.54058	6.78253	3.71347		-1.43107	-2.16234	-2.48139	-0.561299
	2.61304	2.63536	6.89392	3.73009		-1.47127	-2.13824	-2.51024	-0.661278
	2.59988	2.68502	6.99352	3.70223		-1.48226	-2.18928	-2.52448	-0.682582
	2.60342	2.66721	7.08021	3.6963		-1.47833	-2.23134	-2.51051	-0.596172
	2.60047	2.68762	7.09761	3.70572		-1.48062	-2.22093	-2.44403	-0.520478
	2.61637	2.73168	7.02333	3.72562		-1.50995	-2.25458	-2.40918	-0.548416
	2.6401	2.73893	6.88276	3.73788		-1.47282	-2.31535	-2.48481	-0.618413
	2.648	2.78322	6.71104	3.70015		-1.44762	-2.30145	-2.58309	-0.666201
	2.66903	2.89559	6.59048	3.62753		-1.44755	-2.25965	-2.61255	-0.698818
	2.71455	2.95849	6.57992	3.61186		-1.45497	-2.23125	-2.60783	-0.775679
	2.74155	2.96108	6.61513	3.65927		-1.45835	-2.12376	-2.5926	-0.814397
	2.74393	2.98343	6.5996	3.72457		-1.45096	-1.95294	-2.53342	-0.810303
	2.75311	2.97949	6.56064	3.80355		-1.43344	-1.8947	-2.46165	-0.834484
	2.76329	2.88821	6.56869	3.88041		-1.43423	-1.95968	-2.41917	-0.839392
	2.76036	2.81439	6.6577	3.88482		-1.47372	-2.0307	-2.34939	-0.75817
	2.76095	2.81141	6.80465	3.81763		-1.52053	-2.1364	-2.25396	-0.716982
	2.76906	2.78806	6.93831	3.75829		-1.52586	-2.28468	-2.2537	-0.704379
	2.7655	2.77073	6.98177	3.70542		-1.50416	-2.334	-2.35673	-0.638682
	2.76291	2.8531	6.94835	3.60938		-1.49064	-2.25869	-2.46226	-0.545615
	2.79219	2.97766	6.91774	3.50259		-1.48623	-2.19979	-2.5597	-0.466193
	2.82707	3.04864	6.92615	3.44874		-1.48091	-2.16545	-2.66015	-0.377591
	2.81675	3.11939	6.92837	3.4257		-1.47175	-2.09556	-2.68093	-0.358095
	2.776	3.18338	6.8834	3.423		-1.44476	-2.07332	-2.62274	-0.471821
	2.74203	3.13527	6.8301	3.45224		-1.39315	-2.12084	-2.57632	-0.600769
	2.71333	3.0395	6.81822	3.48802		-1.35569	-2.1231	-2.525	-0.626805
	2.6952	3.02787	6.8469	3.49353		-1.34951	-2.08789	-2.44015	-0.589074
	2.70161	3.05665	6.8964	3.54082		-1.35974	-2.13023	-2.40201	-0.549426
	2.70895	3.04689	6.90928	3.64588		-1.37494	-2.18544	-2.46537	-0.49375
	2.70125	3.06415	6.83357	3.74246		-1.39386	-2.15611	-2.54427	-0.429936
	2.70193	3.11388	6.71454	3.80898		-1.40709	-2.13523	-2.58683	-0.390032
	2.70811	3.12324	6.66133	3.86716		-1.41389	-2.18219	-2.61036	-0.343948
	2.68857	3.12695	6.68073	3.89524		-1.43524	-2.20752	-2.59475	-0.295987
	2.65961	3.17611	6.72349	3.82549		-1.46092	-2.22397	-2.53137	-0.356532
	2.65686	3.17547	6.77153	3.72226		-1.47215	-2.32753	-2.51546	-0.527385
	2.67219	3.08456	6.80551	3.64961		-1.47118	-2.42879	-2.5758	-0.666612
	2.66759	3.05102	6.81995	3.59436		-1.47265	-2.4313	-2.60207	-0.727218
	2.63741	3.1208	6.83527	3.58823		-1.46815	-2.44661	-2.56053	-0.765388
	2.59702	3.20566	6.87055	3.64191		-1.44785	-2.52281	-2.51883	-0.776254
	2.55384	3.29619	6.87481	3.68626		-1.42496	-2.545	-2.48275	-0.785155
	2.53345	3.40608	6.82469	3.67821		-1.40481	-2.52901	-2.454	-0.845184
	2.55695	3.42953	6.77177	3.67837		-1.39613	-2.55624	-2.49742	-0.911497
	2.59019	3.34875	6.76937	3.70626		-1.4112	-2.53465	-2.59373	-0.898908
	2.59615	3.30291	6.80261	3.73999		-1.44674	-2.43165	-2.64907	-0.863907
	2.59743	3.28857	6.8321	3.82263		-1.47494	-2.40545	-2.70282	-0.862313
	2.59773	3.20982	6.82881	3.94257		-1.48568	-2.48171	-2.83686	-0.841493
	2.56383	3.12466	6.76341	3.99755		-1.49819	-2.51586	-2.91191	-0.779005
	2.51643	3.13448	6.6859	3.95157		-1.52064	-2.51212	-2.85763	-0.742889
	2.50131	3.17741	6.69184	3.89553		-1.55029	-2.54804	-2.73175	-0.754609
	2.50264	3.2114	6.76605	3.86085		-1.57007	-2.54971	-2.61421	-0.781587
	2.49171	3.29485	6.82771	3.82999		-1.56122	-2.49242	-2.52006	-0.849207
	2.48554	3.36024	6.85469	3.82888		-1.5149	-2.49016	-2.49687	-1.00534
	2.48707	3.31896	6.87728	3.8354		-1.45683	-2.53165	-2.5478	-1.19916
	2.4759	3.26057	6.89872	3.801		-1.42212	-2.51172	-2.58067	-1.35665
	2.46391	3.27598	6.93816	3.75463		-1.41288	-2.51301	-2.53203	-1.45384
	2.46465	3.27009	6.98179	3.74177		-1.40925	-2.61516	-2.43477	-1.4253
	2.46084	3.21949	6.97463	3.76317		-1.40424	-2.68188	-2.36444	-1.228
	2.45642	3.21824	6.9039	3.78086		-1.40369	-2.64977	-2.29647	-0.992408
	2.49437	3.23006	6.83703	3.79381		-1.39595	-2.6472	-2.28037	-0.849292
	2.56266	3.18509	6.83087	3.79925		-1.38042	-2.67963	-2.35248	-0.763859
	2.60347	3.15929	6.85994	3.81364		-1.36849	-2.65708	-2.41752	-0.743936
	2.60616	3.1859	6.89336	3.87306		-1.36068	-2.66141	-2.43597	-0.821462
	2.5789	3.15938	6.93284	4.01804		-1.35578	-2.75154	-2.47752	-0.917641
	2.50054	3.11431	6.97901	4.17259		-1.36908	-2.80981	-2.53846	-0.948
	2.40076	3.16794	7.01392	4.24996		-1.40493	-2.81247	-2.55801	-0.943298
	2.35429	3.25602	7.0609	4.26305		-1.43191	-2.86193	-2.59032	-0.930249
	2.36002	3.2755	7.14267	4.23608		-1.43586	-2.91437	-2.67295	-0.942554
	2.37552	3.29004	7.21472	4.13583		-1.42699	-2.87231	-2.72587	-0.89886
	2.40202	3.32989	7.23354	3.9749		-1.41202	-2.81873	-2.70148	-0.863498
	2.42924	3.3016	7.22679	3.84453		-1.39	-2.8087	-2.65146	-0.797011
	2.42227	3.24695	7.20508	3.80655		-1.37942	-2.74156	-2.58927	-0.725799
	2.39393	3.27191	7.15017	3.87712		-1.39087	-2.63253	-2.516	-0.756764
	2.37787	3.3072	7.07643	4.01336		-1.40053	-2.61817	-2.49026	-0.886594
	2.36351	3.25692	6.98363	4.10937		-1.39686	-2.6559	-2.55798	-0.955233
	2.34243	3.2001	6.86775	4.06762		-1.3921	-2.64462	-2.62933	-0.928863
	2.33645	3.17628	6.79667	3.95073		-1.38951	-2.67381	-2.665	-0.909801
	2.34169	3.11528	6.80945	3.90509		-1.37758	-2.77152	-2.72959	-0.912783
	2.32878	3.06898	6.84219	3.96672		-1.36856	-2.80795	-2.77994	-0.916198
	2.3079	3.0895	6.83114	4.04874		-1.35891	-2.77512	-2.75317	-0.93039
	2.31545	3.07936	6.82094	4.10038		-1.33425	-2.77751	-2.71841	-0.887665
	2.33968	3.00482	6.86629	4.09904		-1.35935	-2.77024	-2.73609	-0.726312
	2.35064	3.0115	6.9588	4.049		-1.35209	-2.70926	-2.73402	-0.549904
	2.3589	3.119	7.05335	4.00695		-1.34289	-2.69871	-2.71028	-0.48557
	2.372	3.19417	7.12148	4.05155		-1.30744	-2.74077	-2.70225	-0.519774
	2.37748	3.2365	7.10977	4.13733		-1.26591	-2.7119	-2.65961	-0.574562
	2.39908	3.29623	7.00256	4.18958		-1.23773	-2.63975	-2.55119	-0.606069
	2.45202	3.30097	6.88606	4.2042		-1.22654	-2.63864	-2.4689	-0.577095
	2.49019	3.23282	6.81426	4.20094		-1.23323	-2.64405	-2.45064	-0.490582
	2.47685	3.20761	6.76595	4.1627		-1.24397	-2.59584	-2.42872	-0.445602
	2.44101	3.20278	6.72913	4.13173		-1.23776	-2.60211	-2.40403	-0.51868
	2.40925	3.12359	6.72061	4.14605		-1.21475	-2.66926	-2.4205	-0.612827
	2.38074	3.03912	6.71182	4.16609		-1.20503	-2.67015	-2.44036	-0.635573
	2.36308	3.03334	6.71411	4.14468		-1.20677	-2.63331	-2.45151	-0.626722
	2.35462	3.04048	6.76764	4.1093		-1.20304	-2.67223	-2.50878	-0.629032
	2.33696	3.03089	6.82057	4.0634		-1.22365	-2.72164	-2.59169	-0.598637
	2.30959	3.08629	6.79214	3.98074		-1.22365	-2.71951	-2.594	-0.559053
	2.29993	3.15975	6.69573	3.90651		-1.20851	-2.74891	-2.55137	-0.545733
	2.31594	3.16126	6.6133	3.88836		-1.18703	-2.78768	-2.56364	-0.519893
	2.33266	3.16268	6.59736	3.90123		-1.18414	-2.73575	-2.61296	-0.496551
	2.35613	3.22359	6.64861	3.91089		-1.18813	-2.6774	-2.66125	-0.53325
	2.40925	3.24376	6.73214	3.96888		-1.18779	-2.71369	-2.71048	-0.543918
	2.4651	3.20287	6.78028	4.06839		-1.19157	-2.73601	-2.69918	-0.425139
	2.48959	3.22988	6.77475	4.16683		-1.20895	-2.69285	-2.55975	-0.240572
	2.50055	3.3141	6.75615	4.25869		-1.22915	-2.68425	-2.39892	-0.114904
	2.50462	3.36659	6.76033	4.33896		-1.24406	-2.70748	-2.33087	-0.066789
	2.48225	3.40734	6.7425	4.32633		-1.25241	-2.67024	-2.34549	-0.0807909
	2.45913	3.43448	6.70301	4.22557		-1.23843	-2.62218	-2.39419	-0.155236
	2.46179	3.36101	6.70011	4.12003		-1.2042	-2.6141	-2.47209	-0.232759
	2.46234	3.25964	6.73883	4.04997		-1.17606	-2.5515	-2.53536	-0.305263
	2.44538	3.28639	6.78497	4.00019		-1.17674	-2.44715	-2.54032	-0.353347
	2.44311	3.37851	6.82462	4.0036		-1.19562	-2.45257	-2.54491	-0.491175
	2.45029	3.41815	6.84256	4.04514		-1.21739	-2.52609	-2.60544	-0.603153
	2.43879	3.44782	6.80979	4.06921		-1.24403	-2.49714	-2.64925	-0.616631
	2.42791	3.50206	6.7597	4.05862		-1.273	-2.40068	-2.63651	-0.609608
	2.43827	3.49806	6.73003	4.08379		-1.29893	-2.32894	-2.6069	-0.617957
	2.44932	3.46074	6.71611	4.15336		-1.3233	-2.2395	-2.6042	-0.596963
	2.45662	3.47553	6.71218	4.21701		-1.34387	-2.16758	-2.59254	-0.589863
	2.49219	3.47459	6.72512	4.24878		-1.33849	-2.21128	-2.61142	-0.599296
	2.54286	3.41566	6.73352	4.22542		-1.312	-2.28111	-2.66145	-0.56109
	2.56556	3.41208	6.71096	4.13316		-1.28564	-2.24736	-2.64484	-0.534036
	2.58014	3.49929	6.65585	4.06938		-1.26078	-2.19783	-2.55989	-0.584869
	2.60831	3.5517	6.58592	4.1388		-1.23393	-2.20229	-2.52048	-0.633965
	2.62067	3.56758	6.49926	4.26016		-1.22299	-2.16826	-2.52946	-0.595057
	2.62151	3.6199	6.39579	4.30793		-1.24205	-2.10391	-2.5185	-0.499768
	2.63938	3.64995	6.31369	4.29304		-1.27159	-2.10479	-2.51088	-0.414318
	2.64333	3.62422	6.29104	4.2803		-1.29719	-2.10294	-2.52598	-0.356755
	2.60886	3.63895	6.30391	4.27778		-1.30714	-2.01579	-2.51844	-0.404807
	2.57561	3.69445	6.3421	4.30089		-1.28644	-1.96557	-2.49811	-0.590515
	2.55599	3.67641	6.40914	4.32648		-1.234	-2.00522	-2.53744	-0.763005
	2.52481	3.63182	6.47498	4.29794		-1.18886	-2.01416	-2.60054	-0.777839
	2.49534	3.66564	6.50485	4.21868		-1.18508	-1.97955	-2.6103	-0.679481
	2.49404	3.71652	6.52126	4.1912		-1.21121	-1.99058	-2.59432	-0.555501
	2.50571	3.71	6.51839	4.23702		-1.25457	-1.97913	-2.59127	-0.437287
	2.51763	3.69248	6.45987	4.29305		-1.31162	-1.89223	-2.54964	-0.413694
	2.54591	3.64354	6.36494	4.31221		-1.35703	-1.86851	-2.50172	-0.532177
	2.58989	3.50859	6.3058	4.31369		-1.36425	-1.92576	-2.51644	-0.660439
	2.62384	3.41445	6.30785	4.28833		-1.35304	-1.92812	-2.52433	-0.730393
	2.65335	3.46868	6.34304	4.27801		-1.33455	-1.90882	-2.45831	-0.828408
	2.69518	3.56978	6.38943	4.33794		-1.29369	-1.97377	-2.40654	-0.964733
	2.71993	3.61688	6.42129	4.44075		-1.24752	-2.04274	-2.41305	-0.983424
	2.70468	3.67132	6.41818	4.49151		-1.22715	-2.0471	-2.42419	-0.908544
	2.68491	3.7362	6.39355	4.50887		-1.23889	-2.07297	-2.45928	-0.770101
	2.68169	3.7443	6.38418	4.55503		-1.26748	-2.10453	-2.54166	-0.586404
	2.68443	3.7603	6.35818	4.61949		-1.3026	-2.04776	-2.5824	-0.454927
	2.71245	3.82515	6.28893	4.66706		-1.31099	-1.97985	-2.55422	-0.43189
	2.76513	3.82897	6.24356	4.67443		-1.28441	-2.00085	-2.5327	-0.432837
	2.78363	3.75307	6.25963	4.592		-1.2657	-2.00838	-2.53574	-0.357099
	2.74483	3.74066	6.29703	4.41647		-1.27694	-1.94117	-2.49512	-0.262421
	2.69715	3.78583	6.34455	4.24834		-1.2956	-1.92073	-2.43502	-0.223723
	2.67794	3.78676	6.40497	4.13778		-1.29942	-1.94982	-2.41643	-0.203373
	2.68473	3.78192	6.42483	4.04878		-1.30177	-1.92138	-2.41407	-0.17549
	2.71661	3.81127	6.38213	3.95876		-1.30354	-1.88681	-2.42034	-0.19525
	2.75501	3.81152	6.32248	3.91024		-1.3034	-1.91493	-2.48323	-0.27608
	2.75654	3.80325	6.24156	3.89471		-1.30851	-1.89956	-2.57321	-0.375175
	2.71462	3.88162	6.15172	3.86776		-1.31097	-1.82556	-2.59525	-0.48448
	2.67826	3.95271	6.0939	3.81322		-1.28734	-1.82138	-2.5848	-0.579195
	2.67781	3.89202	6.08477	3.76332		-1.23681	-1.85332	-2.62591	-0.577274
	2.69251	3.7947	6.09291	3.7427		-1.18819	-1.81485	-2.5699	-0.51038
	2.71586	3.76636	6.12188	3.80868		-1.1478	-1.79114	-2.49221	-0.470389
	2.74706	3.75296	6.19008	3.96566		-1.12091	-1.84724	-2.48551	-0.454753
	2.75731	3.74795	6.25504	4.10313		-1.12201	-1.8658	-2.52609	-0.41467
	2.74058	3.81109	6.25624	4.08925		-1.14428	-1.8244	-2.53937	-0.37029
	2.73676	3.85317	6.19392	3.98064		-1.16301	-1.8227	-2.55086	-0.345768
	2.74532	3.82212	6.11862	3.90397		-1.17118	-1.82082	-2.59598	-0.301009
	2.74267	3.84101	6.05736	3.93941		-1.17969	-1.74776	-2.63079	-0.237013
	2.75343	3.94457	6.05095	4.06786		-1.18174	-1.71691	-2.63264	-0.186934
	2.7845	3.99505	6.11737	4.20554		-1.1788	-1.7854	-2.62045	-0.140325
	2.79046	3.97622	6.18788	4.23269		-1.18051	-1.81838	-2.5867	-0.0703581
	2.75894	3.98339	6.21821	4.14434		-1.19065	-1.79521	-2.50557	-0.00418631
	2.72806	3.96908	6.25486	4.05472		-1.19509	-1.81415	-2.4541	0.0456977
	2.71232	3.90373	6.30341	4.02693		-1.18923	-1.83215	-2.48036	0.113132
	2.71039	3.88312	6.30123	4.00597		-1.18206	-1.77992	-2.51206	0.153026
	2.74371	3.91001	6.24116	3.95174		-1.17095	-1.75587	-2.51019	0.0720688
	2.79818	3.89058	6.17231	3.91667		-1.15811	-1.78713	-2.53917	-0.056302
	2.81687	3.88254	6.1359	3.92795		-1.16061	-1.75242	-2.5879	-0.116875
	2.79777	3.96816	6.15738	3.96895		-1.17941	-1.69493	-2.5995	-0.120912
	2.79327	4.03189	6.1947	4.02649		-1.18295	-1.74522	-2.62119	-0.109788
	2.80525	4.01089	6.1802	4.06601		-1.16986	-1.84236	-2.65959	-0.082176
	2.80502	4.00831	6.1054	4.02816		-1.16231	-1.87433	-2.63051	-0.0903902
	2.80342	4.05933	6.05982	3.96808		-1.16404	-1.89038	-2.54288	-0.162909
	2.79566	4.09328	6.11175	3.96839		-1.17181	-1.90367	-2.47903	-0.208456
	2.75092	4.14872	6.21827	3.99644		-1.18218	-1.8488	-2.41049	-0.194108
	2.69386	4.25033	6.27453	3.95759		-1.17604	-1.79891	-2.30283	-0.19095
	2.67065	4.26667	6.23982	3.8783		-1.13319	-1.84297	-2.22058	-0.188498
	2.66173	4.16803	6.13234	3.81021		-1.08034	-1.85732	-2.19408	-0.138958
	2.64788	4.09254	5.99849	3.79702		-1.05983	-1.74907	-2.17117	-0.0626353
	2.64576	4.06246	5.91466	3.87682		-1.07003	-1.66437	-2.17447	-0.0327624
	2.64633	3.99211	5.91025	4.04742		-1.07415	-1.67388	-2.26535	-0.0221378
	2.63133	3.92083	5.92979	4.17992		-1.06496	-1.68212	-2.39942	0.0394498
	2.6259	3.87998	5.94257	4.20135		-1.06438	-1.70344	-2.49503	0.10829
	2.65317	3.79656	5.98411	4.17969		-1.07919	-1.77715	-2.58248	0.164283
	2.69037	3.70125	6.05179	4.1798		-1.11326	-1.7849	-2.67632	0.257326
	2.71916	3.72572	6.1058	4.14947		-1.15294	-1.68555	-2.71395	0.366779
	2.75388	3.84845	6.1256	4.08214		-1.16644	-1.63717	-2.72071	0.440596
	2.77722	3.93612	6.11063	4.01153		-1.14186	-1.66899	-2.76896	0.517897
	2.74377	3.9949	6.07299	3.92924		-1.11366	-1.66878	-2.80148	0.551197
	2.6678	4.0546	6.05196	3.84863		-1.09391	-1.66557	-2.7829	0.438331
	2.60559	4.05433	6.08427	3.83211		-1.07277	-1.72332	-2.76975	0.239874
	2.56848	4.01378	6.14938	3.84071		-1.07194	-1.75706	-2.74998	0.0853819
	2.55252	4.04298	6.17932	3.77901		-1.09911	-1.73832	-2.67002	-0.0487771
	2.57181	4.10348	6.14741	3.69041		-1.13489	-1.7724	-2.61844	-0.199805
	2.60256	4.10168	6.09165	3.63913		-1.16442	-1.82142	-2.66257	-0.318418
	2.60547	4.10441	6.03899	3.60545		-1.1929	-1.77716	-2.71954	-0.3998
	2.60104	4.14017	5.99597	3.59221		-1.20897	-1.72884	-2.73163	-0.462035
	2.60991	4.10854	6.01456	3.64608		-1.20558	-1.78951	-2.72888	-0.450664
	2.60773	4.01425	6.08335	3.70082		-1.20168	-1.85449	-2.72249	-0.342767
	2.59367	3.98672	6.14597	3.70183		-1.20861	-1.86153	-2.67473	-0.241206
	2.59559	4.00158	6.18496	3.71225		-1.22319	-1.89562	-2.62558	-0.219445
	2.61305	3.97419	6.21138	3.78378		-1.24206	-1.91998	-2.61863	-0.200185
	2.62777	3.96091	6.20486	3.8524		-1.26948	-1.85729	-2.60716	-0.13697
	2.6451	3.97896	6.1804	3.89478		-1.29003	-1.82093	-2.58245	-0.0859146
	2.65755	3.96696	6.18298	3.922		-1.29445	-1.8764	-2.62359	-0.0651529
	2.63631	3.96279	6.19454	3.93491		-1.29283	-1.88279	-2.71064	-0.047996
	2.58767	4.05175	6.1888	3.92705		-1.27729	-1.82144	-2.76168	-0.0544629
	2.56008	4.13563	6.18144	3.94689		-1.23327	-1.82311	-2.80586	-0.055697
	2.56499	4.1014	6.17284	3.95477		-1.17612	-1.85771	-2.86664	0.0387031
	2.56749	4.03452	6.12539	3.88178		-1.15259	-1.84513	-2.876	0.173087
	2.56537	4.00153	6.04626	3.76347		-1.17351	-1.862	-2.86421	0.239051
	2.56701	3.95291	5.98961	3.71178		-1.22649	-1.94143	-2.89896	0.253871
	2.55359	3.9273	5.96252	3.73017		-1.28595	-1.9601	-2.94255	0.270561
	2.54368	4.01409	5.93494	3.76875		-1.31448	-1.92923	-2.933	0.27386
	2.57707	4.11277	5.90097	3.78786		-1.29907	-1.97221	-2.91127	0.275089
	2.62483	4.12518	5.86445	3.72121		-1.26593	-2.03328	-2.87954	0.299913
	2.63683	4.13124	5.81297	3.55626		-1.24327	-2.01741	-2.78946	0.302738
	2.63868	4.15299	5.77474	3.40698		-1.22756	-2.00667	-2.68234	0.234202
	2.65433	4.11307	5.79892	3.37138		-1.20106	-2.04024	-2.65336	0.154312
	2.66397	4.06074	5.8491	3.42448		-1.16752	-2.01305	-2.68789	0.126946
	2.66932	4.06575	5.89947	3.51772		-1.13212	-1.96432	-2.68629	0.111809
	2.68185	4.0263	5.96807	3.60484		-1.09432	-1.99704	-2.66098	0.0499849
	2.674	3.92659	6.04138	3.6191		-1.06288	-2.02483	-2.63167	-0.0280915
	2.6325	3.91034	6.07197	3.51345		-1.04621	-1.96799	-2.58144	-0.108709
	2.60004	3.98028	6.08045	3.3517		-1.02575	-1.94228	-2.54469	-0.163861
	2.59478	3.99876	6.09563	3.24316		-0.993583	-1.98194	-2.59075	-0.0953671
	2.59133	3.97896	6.11005	3.24629		-0.976112	-1.97552	-2.66266	0.109524
	2.59151	3.99078	6.12389	3.33901		-0.994514	-1.94948	-2.69274	0.301128
	2.61371	3.96665	6.15198	3.49904		-1.03296	-1.97969	-2.73768	0.433735
	2.62971	3.90429	6.16801	3.63164		-1.07861	-1.97165	-2.80372	0.569075
	2.62308	3.90692	6.12138	3.64429		-1.11861	-1.87808	-2.79934	0.6995
	2.6272	3.95411	6.02099	3.54413		-1.12692	-1.84008	-2.75247	0.80765
	2.64259	3.96222	5.93777	3.43095		-1.10838	-1.88388	-2.74109	0.921615
	2.63685	4.00627	5.91399	3.33087		-1.09392	-1.88836	-2.74124	1.02505
	2.62895	4.12639	5.94366	3.25091		-1.09589	-1.87635	-2.69233	1.05866
	2.63857	4.18155	6.01283	3.19328		-1.09122	-1.92191	-2.6452	1.03235
	2.62631	4.13065	6.07293	3.14337		-1.07797	-1.94223	-2.58578	0.991225
	2.5756	4.0829	6.07322	3.07923		-1.07292	-1.89844	-2.49055	0.931736
	2.52266	4.04984	6.04205	3.04922		-1.08188	-1.90436	-2.43058	0.860081
	2.48817	3.99612	6.02081	3.08775		-1.10183	-1.94108	-2.48414	0.849733
	2.48776	4.02376	5.99156	3.16559		-1.13454	-1.90437	-2.55331	0.914811
	2.54259	4.14956	5.95902	3.2571		-1.16249	-1.86955	-2.53836	0.968566
	2.63183	4.23311	5.94859	3.38485		-1.15775	-1.90815	-2.49711	0.959172
	2.69556	4.24939	5.92976	3.52769		-1.14303	-1.91425	-2.49354	0.918019
	2.71402	4.28853	5.88547	3.59546		-1.14263	-1.85064	-2.50783	0.845007
	2.7237	4.32585	5.86739	3.57653		-1.13328	-1.83867	-2.57279	0.759752
	2.73992	4.29854	5.89029	3.52107		-1.09338	-1.8691	-2.68781	0.76601
	2.74433	4.28601	5.91494	3.45412		-1.04376	-1.8651	-2.7238	0.888159
	2.74268	4.30489	5.90742	3.40559		-0.996294	-1.88639	-2.674	1.01057
	2.74677	4.26177	5.8482	3.43914		-0.954257	-1.95781	-2.66574	1.08801
	2.73696	4.19432	5.79539	3.49926		-0.947793	-1.95253	-2.70906	1.10746
	2.71806	4.21587	5.76444	3.48022		-0.971859	-1.85967	-2.72252	1.03285
	2.7216	4.27321	5.77989	3.39927		-0.993007	-1.8288	-2.72529	0.906626
	2.73604	4.2772	5.82966	3.33721		-1.00251	-1.85764	-2.73408	0.84891
	2.73016	4.29737	5.84197	3.28775		-1.01664	-1.84394	-2.69781	0.865134
	2.72053	4.34752	5.80261	3.27386		-1.03169	-1.82744	-2.64275	0.887215
	2.72278	4.34384	5.78812	3.31024		-1.03645	-1.83795	-2.64075	0.90973
	2.72315	4.30156	5.80867	3.3245		-1.04089	-1.77457	-2.6823	0.942146
	2.72315	4.30385	5.82357	3.24666		-1.04516	-1.66731	-2.73789	0.955762
	2.73118	4.31405	5.8339	3.16915		-1.05062	-1.6629	-2.84125	0.963639
	2.73173	4.31671	5.8431	3.15772		-1.06749	-1.71797	-2.97048	1.07031
	2.71606	4.41773	5.84604	3.20926		-1.10551	-1.73206	-2.99611	1.27888
	2.71041	4.58134	5.87938	3.31149		-1.13766	-1.76224	-2.91579	1.45095
	2.72743	4.65593	5.95494	3.45309		-1.14506	-1.82128	-2.84848	1.52261
	2.7421	4.63268	5.98977	3.54823		-1.1459	-1.79661	-2.84877	1.51163
	2.74648	4.60437	5.94071	3.55045		-1.15006	-1.72978	-2.89119	1.42097
	2.76239	4.55571	5.86019	3.5243		-1.15141	-1.75713	-2.99973	1.32235
	2.78266	4.49494	5.81055	3.48584		-1.14879	-1.8138	-3.1134	1.32807
	2.77904	4.53531	5.82088	3.38163		-1.14947	-1.80048	-3.11011	1.39843
	2.76799	4.65061	5.88921	3.25001		-1.14627	-1.79547	-3.02429	1.4086
	2.76238	4.70866	5.98872	3.16571		-1.15141	-1.83763	-2.9732	1.36212
	2.74529	4.71852	6.03991	3.10701		-1.18074	-1.82388	-2.96711	1.30771
	2.7395	4.7565	6.00759	3.05792		-1.21187	-1.77162	-2.98273	1.23773
	2.78066	4.75521	5.92293	3.04851		-1.21679	-1.77381	-3.05647	1.1836
	2.83369	4.68783	5.83759	3.04282		-1.19715	-1.77336	-3.1588	1.19751
	2.84713	4.651	5.76092	2.97158		-1.17128	-1.72225	-3.24679	1.18427
	2.83558	4.63456	5.72646	2.90585		-1.13967	-1.72787	-3.24813	1.06944
	2.81229	4.56636	5.76821	2.91607		-1.10864	-1.78128	-3.2368	0.932082
	2.77296	4.52305	5.84601	2.96583		-1.09757	-1.74538	-3.17858	0.897058
	2.75093	4.57924	5.90823	2.98636		-1.11252	-1.6763	-3.05091	0.959961
	2.77144	4.62916	5.95601	2.97611		-1.13298	-1.69967	-2.96495	1.09023
	2.79668	4.63342	5.99622	2.94876		-1.14171	-1.73875	-2.9931	1.27256
	2.79778	4.67511	6.02406	2.9696		-1.14016	-1.72326	-3.04802	1.41683
	2.8049	4.72817	6.05588	3.08285		-1.12334	-1.74137	-3.0788	1.4669
	2.82852	4.70563	6.09307	3.24614		-1.10002	-1.78465	-3.09507	1.50776
	2.84158	4.67007	6.11003	3.3328		-1.08576	-1.74444	-3.05654	1.56141
	2.84518	4.68837	6.12906	3.33358		-1.07891	-1.68641	-2.96889	1.51177
	2.84661	4.67238	6.17916	3.3357		-1.06577	-1.70843	-2.95894	1.36532
	2.8172	4.62287	6.2328	3.34232		-1.06512	-1.72354	-3.02829	1.21878
	2.76362	4.64469	6.2362	3.32874		-1.09051	-1.68259	-3.06877	1.06852
	2.74779	4.70026	6.19177	3.27686		-1.11503	-1.69346	-3.10011	0.92034
	2.77683	4.69629	6.15344	3.23534		-1.11906	-1.7321	-3.19148	0.851628
	2.8131	4.69799	6.07331	3.19274		-1.11273	-1.68677	-3.27805	0.857417
	2.85051	4.74066	6.08661	3.1484		-1.10557	-1.63982	-3.31779	0.866731
	2.88023	4.71957	6.14479	3.13058		-1.0864	-1.66746	-3.33633	0.88762
	2.87286	4.65357	6.21928	3.12325		-1.05699	-1.64928	-3.31535	0.935065
	2.84662	4.65906	6.24682	3.11244		-1.05142	-1.53625	-3.22922	0.945847
	2.84352	4.7114	6.23853	3.11698		-1.00036	-1.45671	-3.15171	0.90033
	2.84794	4.73648	6.21996	3.102		-0.965534	-1.40596	-3.14993	0.863049
	2.83358	4.80055	6.18672	3.02508		-0.96692	-1.31612	-3.16306	0.868726
	2.82485	4.90485	6.1504	2.92645		-0.988338	-1.28731	-3.16316	0.854894
	2.84288	4.92124	6.16132	2.90032		-0.992864	-1.35664	-3.20803	0.844529
	2.86785	4.8586	6.19664	2.95356		-0.996902	-1.38529	-3.26096	0.903752
	2.88416	4.82757	6.20314	3.04687		-1.02054	-1.3556	-3.23836	1.01616
	2.89155	4.80116	6.18176	3.15908		-1.0468	-1.37724	-3.19779	1.1239
	2.87309	4.72041	6.14888	3.26706		-1.06721	-1.39064	-3.18993	1.20225
	2.82103	4.69238	6.11061	3.29029		-1.09216	-1.3093	-3.13619	1.19494
	2.77684	4.73778	6.10164	3.24546		-1.1114	-1.2618	-3.0518	1.09894
	2.7623	4.73861	6.16681	3.21219		-1.11302	-1.33801	-3.03739	1.02087
	2.74537	4.69578	6.28054	3.20198		-1.12134	-1.42368	-3.07086	1.00664
	2.71708	4.68736	6.37257	3.14874		-1.13276	-1.47669	-3.10398	0.993017
	2.69691	4.66192	6.41866	3.0684		-1.13072	-1.56257	-3.17294	0.967576
	2.67223	4.5931	6.41594	2.9697		-1.11924	-1.6025	-3.26566	0.978573
	2.63512	4.59235	6.36241	2.84248		-1.10736	-1.53481	-3.29494	1.00145
	2.61854	4.63926	6.30808	2.73378		-1.08555	-1.49684	-3.28208	0.97188
	2.63216	4.62727	6.33156	2.71221		-1.0529	-1.53478	-3.28271	0.910247
	2.64959	4.61784	6.38485	2.7601		-1.03105	-1.51414	-3.28921	0.858803
	2.64908	4.70907	6.38798	2.86452		-1.01948	-1.43894	-3.27704	0.80752
	2.69539	4.80472	6.35796	3.03329		-1.00939	-1.42051	-3.28352	0.741307
	2.73641	4.81308	6.30535	3.19218		-1.00802	-1.40608	-3.31039	0.71274
	2.76151	4.81005	6.20898	3.23988		-1.02977	-1.36217	-3.30299	0.754684
	2.79075	4.79777	6.10104	3.19652		-1.05749	-1.38811	-3.29327	0.821907
	2.82999	4.72092	6.04039	3.15297		-1.07045	-1.46723	-3.33004	0.926585
	2.85249	4.65268	6.00358	3.13439		-1.07261	-1.46086	-3.35167	1.06535
	2.85331	4.66028	5.98202	3.12853		-1.06166	-1.41577	-3.31064	1.15028
	2.85351	4.64491	5.96768	3.14545		-1.04846	-1.44477	-3.28976	1.14982
	2.84058	4.58252	5.91933	3.16466		-1.05408	-1.45775	-3.32823	1.15778
	2.79538	4.59732	5.81394	3.13857		-1.0763	-1.39248	-3.3722	1.1839
	2.75351	4.67215	5.7105	3.11666		-1.08537	-1.37077	-3.44077	1.15898
	2.7309	4.69567	5.67659	3.14102		-1.08253	-1.41744	-3.54782	1.08724
	2.70066	4.69315	5.69594	3.18343		-1.08871	-1.42503	-3.59897	0.989687
	2.68144	4.716	5.72892	3.21175		-1.09457	-1.42239	-3.5331	0.85585
	2.70525	4.69421	5.75146	3.26646		-1.08988	-1.46347	-3.4155	0.770041
	2.73884	4.65966	5.81638	3.29841		-1.0796	-1.4416	-3.31385	0.821186
	2.74825	4.73333	5.83285	3.25239		-1.07065	-1.34122	-3.2506	0.940794
	2.75148	4.84804	5.91848	3.18379		-1.05414	-1.31086	-3.2837	1.0078
	2.74413	4.88004	5.99214	3.18584		-1.03157	-1.35029	-3.41843	1.03514
	2.70795	4.87564	6.00909	3.24105		-1.01384	-1.34363	-3.55686	1.07108
	2.68148	4.88976	6.00467	3.30757		-1.0053	-1.33677	-3.6053	1.07912
	2.69843	4.84824	6.04712	3.3672		-1.00265	-1.37759	-3.6065	1.04519
	2.7293	4.78201	6.1339	3.40987		-1.01541	-1.37477	-3.59108	1.00717
	2.74506	4.79812	6.22457	3.43736		-1.05202	-1.33447	-3.52646	0.932859
	2.75634	4.84036	6.30467	3.49867		-1.09004	-1.37317	-3.46389	0.832555
	2.75291	4.81502	6.34753	3.58112		-1.11841	-1.44951	-3.47599	0.893809
	2.71901	4.79387	6.31289	3.58147		-1.14477	-1.43157	-3.48568	1.10951
	2.69621	4.83211	6.23083	3.46369		-1.16386	-1.38409	-3.43884	1.2881
	2.72295	4.84963	6.15937	3.31742		-1.16028	-1.39284	-3.40202	1.34802
	2.76891	4.8647	6.11329	3.17951		-1.1413	-1.3841	-3.3674	1.34545
	2.80573	4.94419	6.05977	3.04035		-1.11533	-1.34991	-3.28622	1.27829
	2.83481	5.00474	5.99277	2.96436		-1.07793	-1.39659	-3.22605	1.19191
	2.8241	4.96902	5.93047	2.977		-1.04786	-1.47415	-3.22973	1.20302
	2.7644	4.92976	5.8868	3.01753		-1.04855	-1.47834	-3.22562	1.31847
	2.72	4.92226	5.85552	3.05416		-1.07422	-1.49602	-3.21609	1.41974
	2.72414	4.86738	5.83268	3.10234		-1.09755	-1.57761	-3.28249	1.47805
	2.73599	4.81402	5.77119	3.10878		-1.11192	-1.60978	-3.41229	1.48991
	2.73583	4.84202	5.65142	3.05859		-1.11594	-1.58846	-3.5276	1.4102
	2.73313	4.87824	5.55306	3.00647		-1.10278	-1.62239	-3.61492	1.27775
	2.71284	4.83657	5.54773	2.96871		-1.08728	-1.65505	-3.67504	1.21263
	2.6725	4.78334	5.59878	2.90138		-1.09063	-1.59575	-3.64427	1.2038
	2.6485	4.74935	5.64349	2.84724		-1.10342	-1.55077	-3.54025	1.18037
	2.65473	4.68991	5.65669	2.84973		-1.10141	-1.57736	-3.48018	1.18887
	2.66742	4.68162	5.6389	2.88794		-1.10111	-1.57576	-3.47355	1.26578
	2.68098	4.80447	5.63363	2.91877		-1.10449	-1.54716	-3.45053	1.31974
	2.70833	4.9483	5.69397	2.99206		-1.09623	-1.58849	-3.46624	1.3058
	2.72779	4.98432	5.76878	3.11644		-1.08817	-1.637	-3.56224	1.28446
	2.71592	4.96992	5.77039	3.23108		-1.09599	-1.61866	-3.63592	1.24683
	2.69902	4.935	5.68713	3.30791		-1.10532	-1.63535	-3.67033	1.16715
	2.6978	4.83961	5.59463	3.3642		-1.10544	-1.69781	-3.70641	1.12615
	2.69343	4.76733	5.5377	3.36602		-1.11301	-1.67979	-3.69871	1.13762
	2.69556	4.80019	5.50743	3.32249		-1.11958	-1.61554	-3.63467	1.1338
	2.71955	4.85602	5.50371	3.30678		-1.11578	-1.64858	-3.59431	1.14054
	2.73359	4.87274	5.51157	3.30117		-1.11195	-1.71441	-3.57603	1.20862
	2.72346	4.93523	5.50274	3.24556		-1.10911	-1.7246	-3.51771	1.26496
	2.72786	5.02082	5.48773	3.18158		-1.09796	-1.75986	-3.45558	1.24161
	2.75689	5.02203	5.51737	3.16483		-1.08508	-1.81742	-3.44099	1.20482
	2.78116	4.97266	5.55565	3.18366		-1.09473	-1.79372	-3.44048	1.20667
	2.79512	4.93881	5.54758	3.24633		-1.1214	-1.76005	-3.43208	1.2508
	2.79874	4.86833	5.5737	3.36888		-1.14707	-1.8151	-3.4663	1.34436
	2.77067	4.7638	5.60001	3.48766		-1.16026	-1.85261	-3.55598	1.49148
	2.7129	4.74742	5.59887	3.52227		-1.15877	-1.81203	-3.62292	1.59247
	2.67643	4.78928	5.58319	3.51579		-1.13742	-1.80484	-3.66759	1.56362
	2.68744	4.78569	5.57686	3.52298		-1.10576	-1.84082	-3.72648	1.47843
	2.71936	4.79422	5.56524	3.54491		-1.09077	-1.8123	-3.74511	1.42783
	2.75852	4.87303	5.58342	3.55474		-1.0859	-1.76618	-3.69929	1.37784
	2.8035	4.90992	5.68546	3.56382		-1.08174	-1.79152	-3.67188	1.31628
	2.81692	4.8557	5.82961	3.54063		-1.0847	-1.79635	-3.68933	1.27914
	2.78181	4.79884	5.93337	3.48643		-1.10207	-1.74541	-3.6965	1.26521
	2.74826	4.71057	5.96106	3.46507		-1.12202	-1.74674	-3.71661	1.29497
	2.73518	4.55717	5.92356	3.49464		-1.13787	-1.77652	-3.75239	1.41927
	2.71867	4.47072	5.83107	3.48751		-1.14725	-1.73701	-3.7375	1.55136
	2.71737	4.52586	5.74008	3.42927		-1.13996	-1.729	-3.66171	1.55048
	2.74002	4.61574	5.71927	3.3818		-1.12183	-1.83602	-3.6074	1.45175
	2.74617	4.7045	5.75002	3.36733		-1.11076	-1.92784	-3.57475	1.38329
	2.731	4.8308	5.77015	3.36308		-1.11752	-1.95376	-3.50458	1.36
	2.73686	4.90323	5.77696	3.37331		-1.13203	-1.99102	-3.43023	1.35586
	2.75507	4.85483	5.79546	3.37108		-1.15018	-1.99891	-3.43071	1.39777
	2.75297	4.80427	5.79352	3.33857		-1.17463	-1.90792	-3.50043	1.46532
	2.74685	4.82509	5.74833	3.3126		-1.1917	-1.83667	-3.60488	1.4754
	2.75217	4.81912	5.67271	3.32697		-1.18517	-1.85266	-3.73545	1.44276
	2.7503	4.79209	5.58206	3.33663		-1.16605	-1.84514	-3.82707	1.44201
	2.74183	4.83956	5.52075	3.29314		-1.15657	-1.79667	-3.80742	1.4424
	2.75131	4.89882	5.56281	3.25349		-1.18519	-1.79556	-3.76156	1.40691
	2.75849	4.90142	5.66859	3.25336		-1.17642	-1.78449	-3.77778	1.39192
	2.73383	4.91914	5.72203	3.30348		-1.15486	-1.6791	-3.79119	1.42095
	2.70393	4.94202	5.6772	3.37445		-1.12731	-1.59687	-3.77359	1.44608
	2.6896	4.86313	5.57601	3.48103		-1.10599	-1.6199	-3.7937	1.4987
	2.66779	4.76279	5.47287	3.57155		-1.11349	-1.65377	-3.81875	1.60145
	2.64535	4.75542	5.42623	3.6165		-1.14581	-1.68542	-3.79285	1.67851
	2.65517	4.76664	5.46411	3.67122		-1.1668	-1.78322	-3.76977	1.69712
	2.68128	4.74746	5.54776	3.74703		-1.17018	-1.86551	-3.75577	1.71408
	2.70292	4.79325	5.59799	3.73064		-1.16814	-1.85862	-3.67694	1.69039
	2.74128	4.89975	5.59963	3.61686		-1.16087	-1.88168	-3.57493	1.55152
	2.79157	4.96024	5.62184	3.50221		-1.1364	-1.96406	-3.57683	1.35564
	2.82019	4.99114	5.70161	3.44222		-1.10804	-1.97694	-3.67036	1.18241
	2.83021	5.02292	5.78814	3.43774		-1.08747	-1.92198	-3.75986	1.04217
	2.83996	4.98165	5.83626	3.49634		-1.0703	-1.89809	-3.80595	0.998832
	2.82983	4.86525	5.80113	3.54991		-1.06729	-1.87041	-3.80888	1.13993
	2.78813	4.80868	5.68502	3.52961		-1.08417	-1.80979	-3.74736	1.38227
	2.74296	4.83534	5.58684	3.48159		-1.09485	-1.82748	-3.68574	1.52327
	2.71751	4.84916	5.57891	3.49269		-1.07742	-1.91277	-3.69718	1.55391
	2.71117	4.88895	5.61248	3.53903		-1.06443	-1.92345	-3.7134	1.56481
	2.73469	4.99521	5.61937	3.57375		-1.0755	-1.86384	-3.66339	1.56731
	2.78847	5.06944	5.61177	3.61508		-1.0981	-1.8438	-3.61864	1.57335
	2.82573	5.07159	5.61568	3.64598		-1.13299	-1.81807	-3.61672	1.62357
	2.81776	5.0934	5.65478	3.5937		-1.17218	-1.74156	-3.58725	1.65228
	2.80088	5.09832	5.72946	3.49142		-1.19314	-1.72109	-3.56382	1.57267
	2.79452	4.99053	5.81526	3.41141		-1.18881	-1.75607	-3.61442	1.46865
	2.77098	4.8596	5.84782	3.32633		-1.17126	-1.72391	-3.68424	1.37252
	2.73117	4.7971	5.80815	3.24051		-1.12877	-1.66401	-3.74128	1.21746
	2.69976	4.75795	5.7664	3.2329		-1.06785	-1.6691	-3.81556	1.02501
	2.68324	4.73308	5.77565	3.29991		-1.02955	-1.64956	-3.85574	0.883017
	2.69458	4.79216	5.806	3.34767		-1.04011	-1.56807	-3.81961	0.791334
	2.74423	4.87286	5.80545	3.37379		-1.08699	-1.54508	-3.76482	0.761939
	2.79487	4.87913	5.74269	3.37548		-1.13563	-1.5733	-3.74586	0.868807
	2.80352	4.86385	5.60071	3.33788		-1.16831	-1.55613	-3.7305	1.07293
	2.78861	4.88261	5.43802	3.31462		-1.17144	-1.55861	-3.70421	1.22992
	2.78295	4.88433	5.37439	3.38245		-1.15832	-1.64946	-3.70459	1.29283
	2.77622	4.88515	5.4173	3.46875		-1.15865	-1.70862	-3.74788	1.30751
	2.75547	4.99001	5.51382	3.49252		-1.18266	-1.67836	-3.78334	1.2746
	2.7442	5.12341	5.63973	3.47317		-1.20747	-1.65859	-3.82949	1.19592
	2.75154	5.14876	5.77206	3.44302		-1.21794	-1.64907	-3.90002	1.16274
	2.75619	5.1134	5.85062	3.39009		-1.22491	-1.57087	-3.91817	1.18236
	2.76948	5.08495	5.85391	3.36066		-1.22271	-1.50234	-3.85984	1.18096
	2.80267	5.01061	5.80918	3.39812		-1.21512	-1.52358	-3.82509	1.17827
	2.82202	4.92937	5.75398	3.4612		-1.22052	-1.51405	-3.82466	1.23726
	2.81965	4.9494	5.73987	3.49405		-1.23753	-1.43439	-3.78316	1.29557
	2.84323	4.99325	5.79344	3.52346		-1.2452	-1.40473	-3.73005	1.29957
	2.88943	4.98337	5.88397	3.52642		-1.23925	-1.41984	-3.719	1.3021
	2.91547	5.00157	5.92992	3.45106		-1.23424	-1.40173	-3.72226	1.29526
	2.93339	5.05676	5.91514	3.34117		-1.2328	-1.44072	-3.74752	1.22307
	2.94774	5.0356	5.8914	3.2951		-1.23511	-1.56219	-3.82772	1.14566
	2.92434	4.97473	5.8778	3.33358		-1.24062	-1.6167	-3.91195	1.11439
	2.87588	4.99073	5.83997	3.42573		-1.24755	-1.59465	-3.93356	1.0687
	2.84756	5.02572	5.77763	3.54289		-1.24888	-1.6066	-3.93016	1.02448
	2.8251	5.00762	5.71966	3.59851		-1.25765	-1.60265	-3.94413	1.07634
	2.78215	5.00753	5.67673	3.54104		-1.28957	-1.50211	-3.94344	1.21311
	2.74535	5.05457	5.68241	3.42963		-1.32597	-1.41453	-3.93102	1.33695
	2.73051	5.05117	5.75096	3.37384		-1.34172	-1.40718	-3.97959	1.44045
	2.72123	5.02369	5.80478	3.3733		-1.34341	-1.39385	-4.0419	1.52112
	2.72935	5.046	5.7844	3.37995		-1.34599	-1.39372	-4.00541	1.517
	2.77551	5.04258	5.7235	3.36402		-1.33616	-1.48477	-3.91113	1.43851
	2.82111	4.99913	5.66109	3.32438		-1.3162	-1.56616	-3.84949	1.3901
	2.82292	5.02991	5.58479	3.26534		-1.29471	-1.53276	-3.79896	1.40097
	2.80075	5.10257	5.49881	3.24886		-1.26401	-1.50833	-3.77653	1.43934
	2.77132	5.06416	5.418	3.30642		-1.22691	-1.55641	-3.83505	1.49144
	2.73005	4.97171	5.34772	3.38494		-1.21129	-1.55604	-3.87725	1.50164
	2.70658	4.94724	5.29788	3.42592		-1.22273	-1.50726	-3.83624	1.39996
	2.72287	4.95423	5.29615	3.4577		-1.23854	-1.49235	-3.79863	1.29743
	2.7408	4.9698	5.3377	3.46401		-1.26022	-1.45088	-3.79649	1.33581
	2.74994	5.04912	5.40188	3.40837		-1.29288	-1.36507	-3.76261	1.45854
	2.78623	5.13354	5.48818	3.33214		-1.31918	-1.37593	-3.71856	1.51376
	2.83743	5.106	5.5842	3.30701		-1.32277	-1.45555	-3.71438	1.50273
	2.85643	5.03573	5.63377	3.30507		-1.3208	-1.45053	-3.72408	1.46309
	2.84004	5.01128	5.61415	3.28692		-1.3254	-1.39514	-3.74162	1.36628
[truncated: 5,501 more rows]

## Sheet: LH_dLight
	-0.0225758	-0.0811688	-0.0152729	0.0557898		-0.0811422	-0.0284149	0.107199	-0.00931754
	-0.00266788	-0.0662265	-0.0246043	0.0709971		-0.0417234	-0.0633718	0.106787	-0.00199618
	-0.000272171	-0.0600619	-0.0100151	0.0910085		0.00826666	-0.0642844	0.0802836	-0.0149466
	-0.00429682	-0.0488621	0.00700245	0.0788816		0.0393878	-0.0377626	0.0492128	-0.0283026
	0.000342771	-0.0273034	0.00300004	0.0369928		0.0354201	-0.0105851	0.021049	-0.0237344
	0.0165797	-0.00742024	-0.0203373	-0.0119818		0.0160859	-0.00441274	0.00321448	-0.0126749
	0.0206603	-0.00106241	-0.0390641	-0.04424		-0.00213346	-0.0196067	0.0172849	-0.0105316
	-0.00227221	-0.00920535	-0.0309095	-0.0460444		-0.0212348	-0.036383	0.0690423	-0.0191326
	-0.0288185	-0.025161	-0.00428292	-0.0271313		-0.0264914	-0.0359287	0.130103	-0.0353455
	-0.0355065	-0.0373365	0.00457149	-0.0136433		-0.00571676	-0.0249254	0.176852	-0.0503733
	-0.0313984	-0.037468	-0.024285	-0.0131012		0.01428	-0.0240756	0.190328	-0.0475236
	-0.0300892	-0.0341169	-0.0734816	-0.0150338		0.0107204	-0.0304253	0.153116	-0.0267054
	-0.0326428	-0.0452032	-0.110245	-0.0165008		0.000427558	-0.0276912	0.0888529	-0.00978612
	-0.0399971	-0.0704185	-0.115355	-0.0194852		-0.0116126	-0.022	0.0439681	-0.00685413
	-0.0462751	-0.090005	-0.10197	-0.0194608		-0.042517	-0.031444	0.0266042	-0.00462954
	-0.0390054	-0.0841108	-0.0986885	-0.0138752		-0.0805484	-0.0591611	0.0152033	0.00395098
	-0.0270765	-0.0489576	-0.108059	0.00216806		-0.100202	-0.0901426	0.0074988	0.0171782
	-0.0324935	-0.00559877	-0.0940025	0.0326673		-0.113561	-0.106899	0.0097881	0.0389238
	-0.0516098	0.0194784	-0.0368628	0.0696922		-0.120528	-0.0981079	0.0275049	0.0645008
	-0.0555476	0.0207326	0.0396005	0.0873791		-0.0890524	-0.073857	0.0689003	0.0786063
	-0.0306903	0.015148	0.0919845	0.0711024		-0.0276644	-0.0625535	0.119846	0.0798299
	0.00420082	0.017883	0.0958297	0.0334176		0.0252704	-0.0763626	0.144882	0.0797352
	0.0264868	0.0222493	0.0636327	-0.00738721		0.0623881	-0.092507	0.132805	0.0764404
	0.0251362	0.0105278	0.0298135	-0.029245		0.0856047	-0.0877158	0.107799	0.0621875
	0.001806	-0.0136133	0.0148126	-0.0234015		0.0717775	-0.0696896	0.0873133	0.0466103
	-0.0222089	-0.0283282	0.0150947	-0.00053829		0.0308871	-0.0549718	0.0684455	0.0374196
	-0.0267585	-0.0269658	0.0236469	0.0262945		0.00634666	-0.053514	0.0520692	0.0302457
	-0.0202096	-0.0191947	0.0319587	0.0661859		0.00430885	-0.0759374	0.0392401	0.0255644
	-0.02971	-0.00968233	0.0289767	0.118018		0.00499814	-0.103014	0.027854	0.0273024
	-0.0576093	-0.00924874	0.0131187	0.156812		0.00811926	-0.0902228	0.0284467	0.0247098
	-0.0757584	-0.0212235	-0.00655264	0.154552		0.0167543	-0.0399831	0.0541907	0.0108523
	-0.0647304	-0.0167154	-0.0247359	0.100095		0.0205856	-0.00708092	0.0883376	0.000862684
	-0.0320387	0.0202996	-0.0393344	0.0120168		0.0230616	-0.0102837	0.104241	0.00330657
	-0.00060084	0.0562976	-0.0402972	-0.0654965		0.0304993	-0.0230774	0.103539	0.00726931
	0.0082286	0.0608892	-0.0280074	-0.103685		0.0266806	-0.027296	0.09721	0.0135531
	-0.00952975	0.0435113	-0.0204704	-0.106476		0.000707846	-0.0137407	0.0930096	0.0313616
	-0.0270179	0.0216976	-0.0251463	-0.0915138		-0.0264217	0.0149548	0.0959511	0.0481858
	-0.0165503	0.00759874	-0.0302587	-0.0689882		-0.0287587	0.0272396	0.0996524	0.0562574
	0.0086804	0.0124084	-0.0227843	-0.0469855		-0.0089151	0.00179457	0.086318	0.0689499
	0.0145813	0.0227855	0.00576495	-0.0241794		0.0216253	-0.0266727	0.053601	0.0834444
	-0.0017541	0.0107329	0.0500218	-0.00779099		0.0475627	-0.0233475	0.0190253	0.0780231
	-0.0182178	-0.0156248	0.0705491	-0.00952731		0.0538694	-0.0091554	-0.00138957	0.0563363
	-0.021043	-0.0246137	0.0400567	-0.0225868		0.0434436	-0.0122347	-0.00680482	0.0371657
	-0.00658512	-0.0220005	-0.0158492	-0.0242617		0.0296245	-0.0322577	-0.00955518	0.0150653
	0.00940182	-0.0336725	-0.0561316	-0.00530067		0.0194264	-0.0548096	-0.0194776	-0.0174805
	0.00120438	-0.0565378	-0.068038	0.0250227		0.0110214	-0.0540502	-0.0321187	-0.047491
	-0.0276335	-0.0747041	-0.0569644	0.0553553		0.00966605	-0.00625897	-0.0413333	-0.0660649
	-0.0464972	-0.0799053	-0.0415805	0.0718131		0.023001	0.058593	-0.0396268	-0.070792
	-0.0403973	-0.0624928	-0.042046	0.0661962		0.0504655	0.0751549	-0.0234937	-0.053984
	-0.0228732	-0.0303779	-0.048184	0.0477158		0.0833796	0.0373798	-0.00616446	-0.0224121
	-0.0106171	-0.0220738	-0.0281785	0.0371373		0.104335	-0.00386312	0.00153755	-0.00785136
	-0.0151942	-0.0482969	0.0186408	0.0376268		0.0938925	-0.0169504	0.00861479	-0.0246611
	-0.0365589	-0.0734665	0.0586868	0.0411347		0.0483139	-0.0077086	0.0202555	-0.0546977
	-0.0529791	-0.0752782	0.0637161	0.0392138		-0.00691694	0.00643479	0.0228631	-0.080926
	-0.0506718	-0.0651584	0.0342	0.0282918		-0.0368153	0.00736971	0.0105116	-0.0960036
	-0.0463963	-0.0585667	-0.00572891	0.0155204		-0.0358089	-0.00269345	-0.0106613	-0.0857255
	-0.0572272	-0.0657599	-0.0225837	0.0252568		-0.0231316	0.00120186	-0.0336433	-0.0508
	-0.0756815	-0.0818987	-0.00505205	0.0618965		-0.0112465	0.0240847	-0.0476433	-0.014006
	-0.0875103	-0.0827946	0.021834	0.0945668		-0.00762363	0.0382428	-0.0472122	0.0180868
	-0.0839458	-0.058558	0.0311811	0.096377		-0.0175848	0.0255912	-0.0456174	0.0531332
	-0.0581971	-0.0330602	0.0290134	0.0738206		-0.0261698	-0.000499423	-0.0574192	0.0816375
	-0.0211812	-0.0298215	0.0345912	0.0452507		-0.0245968	-0.017921	-0.0661422	0.0856147
	0.000823827	-0.0407384	0.0545632	0.0335012		-0.0298139	-0.0179224	-0.045733	0.070494
	0.00717232	-0.0395345	0.0781321	0.0479578		-0.0451599	-0.00703752	-0.00149768	0.0505038
	0.0178322	-0.0112686	0.0787599	0.0667599		-0.0437851	-0.00428288	0.0420454	0.0300499
	0.0316277	0.0323026	0.0403074	0.0625282		-0.0228634	-0.0224656	0.0653527	0.0134039
	0.0347119	0.0592678	-0.0156067	0.0404427		-0.00409583	-0.0423961	0.0546372	0.00771391
	0.0249694	0.0517236	-0.0476408	0.0229795		0.0144016	-0.0309721	0.0110779	0.0129524
	0.00370169	0.0301861	-0.0455568	0.0293197		0.0387332	0.0108378	-0.0295471	0.0284294
	-0.0213553	0.0289773	-0.0279219	0.0556973		0.0478654	0.0424625	-0.0440711	0.0529826
	-0.0253128	0.053542	-0.0134505	0.0737001		0.0410585	0.0371838	-0.0508594	0.0722078
	0.00459072	0.0724857	0.00123703	0.0606245		0.0438938	0.00791431	-0.0624096	0.0658086
	0.0405122	0.0568957	0.0322705	0.032225		0.0471946	-0.0121804	-0.0672594	0.03989
	0.0479405	0.00911363	0.081755	0.0210091		0.0288342	-0.00159815	-0.0598977	0.0231408
	0.0283361	-0.0409748	0.12251	0.0293655		0.00847375	0.0299675	-0.0413443	0.0265931
	0.00307853	-0.0626234	0.124249	0.0361459		0.0133412	0.0518148	-0.0135939	0.0359203
	-0.0140144	-0.0542657	0.0846991	0.0177977		0.0276247	0.0469417	0.00591118	0.0391805
	-0.0183132	-0.0434193	0.0247209	-0.0185239		0.040966	0.03616	0.00288974	0.0283339
	-0.013273	-0.0528259	-0.0298347	-0.0397453		0.0617241	0.048556	-0.00567115	0.00408072
	-0.00715919	-0.0756679	-0.0643174	-0.0203539		0.0676495	0.0750229	-0.000304969	-0.0144762
	-0.00143555	-0.0821548	-0.0759517	0.0201917		0.0419086	0.0868957	0.0131319	-0.0111016
	0.0159701	-0.059428	-0.0617771	0.0394527		0.0132854	0.0782921	0.0195477	0.00150676
	0.0439747	-0.0256651	-0.0219547	0.0232932		0.00358827	0.0588176	0.0150349	0.00373264
	0.0544195	0.000456526	0.0315376	-3.4536e-05		-0.00829372	0.0380549	0.00677298	-0.00184521
	0.0318202	0.0175659	0.0768436	0.00139502		-0.0331124	0.0398618	0.0091509	-0.00933031
	-0.00696608	0.0285078	0.0975694	0.0312743		-0.055282	0.0715801	0.0325249	-0.0199848
	-0.0362287	0.0394901	0.087075	0.0591644		-0.0692396	0.0884678	0.0588116	-0.0253397
	-0.0468346	0.0562841	0.0572028	0.0511431		-0.0674475	0.0605072	0.0555118	-0.0142901
	-0.0410425	0.0616806	0.0376157	0.00517194		-0.03944	0.0178779	0.0229186	0.00403264
	-0.0247889	0.0414654	0.0458085	-0.0408172		-0.00157312	-0.00865455	0.000642571	0.0191888
	-0.00894425	0.0212648	0.0687269	-0.0612881		0.0120314	-0.0222574	0.00818274	0.0368523
	0.00444087	0.0213934	0.0818839	-0.0563329		0.00246992	-0.0270113	0.0238216	0.0518876
	0.0245317	0.0235255	0.0802845	-0.0439034		-0.00220364	-0.0293618	0.0236749	0.0435992
	0.0429787	0.018667	0.072929	-0.0392387		0.00731036	-0.0377487	-0.000830578	0.0187507
	0.0327264	0.0183878	0.0717418	-0.0335586		0.0167716	-0.0243141	-0.0412266	0.000793878
	-0.0104605	0.0180315	0.0822519	-0.00152844		0.0128415	0.0357024	-0.0706695	-0.0115927
	-0.0601776	0.0196227	0.0915979	0.0579701		0.00189608	0.0963438	-0.0698897	-0.0242574
	-0.0922558	0.0456923	0.0805943	0.103131		0.00148374	0.0974412	-0.0476618	-0.0290448
	-0.0936807	0.0861451	0.0571107	0.0994055		0.0252273	0.0535981	-0.0269981	-0.0331566
	-0.0578219	0.0937493	0.0440132	0.0489603		0.0584932	0.0211748	-0.0199987	-0.0463393
	1.92855e-05	0.054139	0.0468875	-0.00786735		0.0668839	0.0256286	-0.0266512	-0.0527493
	0.0471441	0.00353847	0.0581843	-0.0241125		0.041836	0.0607815	-0.0393675	-0.0363977
	0.0709639	-0.0241619	0.0699445	2.68841e-05		0.00932336	0.0933078	-0.050705	-0.0134862
	0.0738281	-0.0121629	0.0662706	0.0116729		-0.0021813	0.0788698	-0.0614769	-0.000873762
	0.0567529	0.0343299	0.0422945	-0.019902		0.00808627	0.0247332	-0.0746152	0.00438914
	0.0325302	0.0751157	0.0156687	-0.0647726		0.021353	-0.00806726	-0.0871846	0.00564197
	0.0139903	0.0721783	-0.002157	-0.0739993		0.0222576	0.00611455	-0.0853747	0.000831938
	-0.000330434	0.0396865	-0.0205156	-0.0397067		0.00950227	0.0270674	-0.067716	-0.00654265
	-0.00645101	0.0156741	-0.041227	0.00155558		-0.00378644	0.0165945	-0.0567583	-0.0199222
	0.0123223	0.00710721	-0.0503803	0.00387266		-0.00665144	-0.0249689	-0.0640574	-0.0453429
	0.0524796	0.00282094	-0.0363172	-0.0353136		-0.00591352	-0.06986	-0.0726725	-0.0648888
	0.0846272	-0.0046286	-0.00333138	-0.0701323		-0.0169689	-0.0788903	-0.0668309	-0.055833
	0.0950429	-0.0239458	0.0271698	-0.0603786		-0.035038	-0.042334	-0.0509188	-0.032102
	0.0905267	-0.043752	0.0322535	-0.0314465		-0.040561	-0.00218348	-0.0355674	-0.0266492
	0.0788902	-0.0368644	0.0130272	-0.035998		-0.025817	-0.00319991	-0.0326505	-0.0434327
	0.073396	-0.00714214	-0.00538363	-0.0851169		0.00328736	-0.0362918	-0.0488823	-0.0666432
	0.0785706	0.0135678	-0.00681472	-0.13603		0.0372512	-0.063527	-0.0610162	-0.086788
	0.077191	0.0182065	-0.00186146	-0.145009		0.0499893	-0.0656595	-0.0430261	-0.0965561
	0.0615346	0.0266914	-0.0120751	-0.104572		0.0225732	-0.049193	-0.00404891	-0.0930168
	0.0548929	0.0504977	-0.0361222	-0.0526044		-0.0163562	-0.029878	0.023631	-0.0846779
	0.0735709	0.077417	-0.055096	-0.0346461		-0.0327794	-0.0174647	0.0291326	-0.0719146
	0.101724	0.0814894	-0.056382	-0.0521893		-0.0406479	-0.00775293	0.0240885	-0.046022
	0.120379	0.0521303	-0.0460196	-0.0649128		-0.0613515	0.0155382	0.018017	-0.0100518
	0.120148	0.0152291	-0.0360542	-0.0439713		-0.0870435	0.0539426	0.0138682	0.0163787
	0.0969777	0.00845653	-0.0322879	0.00100876		-0.109692	0.0839567	0.00174331	0.0224877
	0.067756	0.0293708	-0.0308616	0.0386772		-0.116734	0.0854848	-0.0366736	0.00621115
	0.0558674	0.040433	-0.0281732	0.0374264		-0.0806714	0.0695995	-0.0957112	-0.0328576
	0.051866	0.0200985	-0.0283717	0.00671263		-0.0136378	0.0577417	-0.134339	-0.0794799
	0.0323675	-0.00873577	-0.0339536	-0.0150895		0.0222245	0.0543641	-0.125922	-0.0997577
	0.00196422	-0.0062053	-0.0411762	-0.00771079		0.0110935	0.0521682	-0.0873012	-0.0776667
	-0.0171727	0.0389611	-0.0463866	0.00697604		-0.00155747	0.0414659	-0.0399448	-0.0317017
	-0.0190008	0.0956443	-0.0527704	0.00134496		0.00127653	0.0144511	0.00217842	0.0145425
	-0.0115813	0.117216	-0.0676538	-0.0287791		0.00553674	-0.0101766	0.0241642	0.0526777
	0.000227375	0.0853265	-0.0864695	-0.0645573		0.0108929	-0.000584784	0.0278548	0.0753376
	0.0101118	0.0330831	-0.0947891	-0.0811995		0.0134081	0.0361344	0.028349	0.0745314
	0.0100611	0.00877624	-0.0885723	-0.0765768		0.000710925	0.0562189	0.0197832	0.0536159
	0.00729004	0.021231	-0.0746647	-0.0771037		-0.00283123	0.0438732	-0.0110781	0.0167131
	0.0166604	0.0337295	-0.0482327	-0.0919216		0.030417	0.023455	-0.0473368	-0.0268328
	0.0385572	0.0158677	-0.0102934	-0.100681		0.0582766	0.0174191	-0.0657973	-0.0472835
	0.0543654	-0.0172163	0.0161091	-0.0828304		0.0349884	0.0374572	-0.0613403	-0.023112
	0.0508931	-0.0311841	0.015704	-0.0536093		-0.0188749	0.0740136	-0.0443381	0.0269958
	0.0322863	-0.0134001	-0.00407022	-0.0424195		-0.0640122	0.0836304	-0.0337642	0.066725
	0.00657122	0.023275	-0.0234673	-0.0666116		-0.0874279	0.0414941	-0.0465839	0.078275
	-0.0148265	0.0485754	-0.0255883	-0.102539		-0.0817372	-0.0074801	-0.0768083	0.0569201
	-0.0254884	0.0408057	-0.0120741	-0.0994275		-0.0525751	-0.014121	-0.0996093	0.00983359
	-0.0386709	0.0211521	-0.00660555	-0.0380162		-0.0277655	0.00494546	-0.1081	-0.0323741
	-0.0651217	0.0270576	-0.01559	0.0327184		-0.0113475	0.0176409	-0.119353	-0.0475863
	-0.0845891	0.0479574	-0.0170124	0.048828		0.018027	0.0186492	-0.136772	-0.0471704
	-0.0692844	0.0470397	-0.00251729	0.00557894		0.055877	0.00682663	-0.140196	-0.0438421
	-0.0281137	0.0247466	0.00788686	-0.0483335		0.0680426	-0.0073984	-0.116545	-0.0273855
	0.010755	0.00222004	-0.00805939	-0.0562391		0.0403432	0.00169313	-0.072582	-7.33812e-05
	0.037538	-0.00895544	-0.0596156	-0.0149618		-0.00940004	0.0246625	-0.0195706	0.0214077
	0.0537116	0.00233807	-0.133609	0.0199606		-0.0508945	0.0175598	0.0215937	0.0324147
	0.0589644	0.0290301	-0.185093	0.00489959		-0.058321	-0.0164713	0.0285831	0.0366734
	0.0593774	0.0336448	-0.168835	-0.0443144		-0.0340323	-0.0323638	0.00507201	0.0282238
	0.0529085	0.00732473	-0.0974323	-0.0898494		-0.00157733	-0.0177496	-0.0277088	0.0200729
	0.0227853	-0.015552	-0.0256982	-0.114885		0.0216293	0.00627371	-0.0570432	0.0338726
	-0.0270439	-0.0186993	0.0167289	-0.125118		0.0347699	0.0221765	-0.0842457	0.0548208
	-0.0646204	-0.0163565	0.0404789	-0.136953		0.02981	0.0156472	-0.11022	0.0535779
	-0.0679754	-0.012923	0.0604334	-0.156141		-0.0119024	-0.0128049	-0.128832	0.0363093
	-0.0442615	-0.00555101	0.0792339	-0.151601		-0.0780523	-0.0262285	-0.128106	0.0248281
	-0.012068	-0.00454693	0.0807747	-0.104224		-0.12838	-0.00411436	-0.0989148	0.0197591
	0.00585619	-0.00929556	0.0446175	-0.0383043		-0.136647	0.020971	-0.050303	0.0155867
	-0.00272061	-0.00635131	-0.0160395	0.0043083		-0.108967	0.0246903	-0.0116663	0.0114174
	-0.0175228	-0.00749624	-0.0549295	0.00849247		-0.060464	0.0212472	-0.00874318	-0.00185067
	-0.0174152	-0.0304808	-0.051467	-0.0138782		-0.00694323	0.0224677	-0.0320686	-0.0244166
	-0.011235	-0.0595679	-0.0315809	-0.0267551		0.0309445	0.0207519	-0.0534244	-0.0356224
	-0.0121672	-0.0675116	-0.0260396	-0.00472431		0.0426409	0.0137275	-0.0711081	-0.0357884
	-0.0168115	-0.0514355	-0.0426543	0.0348216		0.0399494	0.0016881	-0.0933269	-0.0525713
	-0.0176452	-0.0203137	-0.0625274	0.0452875		0.0364057	-0.0155982	-0.113604	-0.089298
	-0.0105562	0.0115308	-0.0617727	0.0164918		0.0302678	-0.0218096	-0.121636	-0.115819
	0.00579241	0.0234734	-0.0361156	-0.0163455		0.0177592	-0.00530928	-0.109378	-0.111818
	0.0172402	0.0171029	-0.00897948	-0.0201794		-0.00206334	0.0129938	-0.0714575	-0.0727712
	0.00543428	0.0143652	-0.00345255	0.00526704		-0.0266149	0.000870035	-0.0333205	-0.00718206
	-0.0166538	0.0173197	-0.0194419	0.0287628		-0.0384727	-0.0402924	-0.0386662	0.0523783
	-0.0205277	0.00994333	-0.0370446	0.0137546		-0.0179128	-0.0825105	-0.0834162	0.0701439
	-0.00692158	-0.0150241	-0.0343516	-0.0381499		0.0174781	-0.101459	-0.124519	0.0576774
	0.00538026	-0.0533298	-0.00134603	-0.0758853		0.0325512	-0.0888655	-0.137619	0.0496959
	0.00585739	-0.0868381	0.0482894	-0.070442		0.0310676	-0.05726	-0.126198	0.0562398
	-0.00957755	-0.0915666	0.0831984	-0.0496392		0.031266	-0.0360998	-0.10371	0.0655222
	-0.0326273	-0.0652027	0.0827939	-0.0543213		0.0273553	-0.0438013	-0.0889833	0.0653955
	-0.038307	-0.0317028	0.0559565	-0.0833496		0.0211688	-0.063677	-0.0891881	0.0485755
	-0.016874	-0.0141259	0.0212913	-0.094455		0.0261908	-0.0651137	-0.0830858	0.0233789
	0.00750097	-0.0148703	-0.0144839	-0.0395901		0.0297404	-0.0460227	-0.0616938	0.0116665
	0.0173262	-0.0198516	-0.058564	0.0728468		0.0221053	-0.0305899	-0.0544126	0.0163148
	0.0233062	-0.0210143	-0.11204	0.165624		0.0304398	-0.0360396	-0.0825087	0.0152613
	0.0325707	-0.0278813	-0.156482	0.174215		0.0623781	-0.055003	-0.127385	-0.00265248
	0.0413329	-0.0572021	-0.169976	0.110668		0.0820009	-0.0643618	-0.159701	-0.020516
	0.0506753	-0.103114	-0.151927	0.0298274		0.0773134	-0.0447642	-0.1654	-0.0232031
	0.0570292	-0.131919	-0.112432	-0.021391		0.0682067	-0.00787041	-0.140807	-0.0162129
	0.0499459	-0.111431	-0.055431	-0.0439776		0.047698	0.00778028	-0.109203	-0.00919657
	0.0279838	-0.048965	0.0111881	-0.0710377		0.0139852	-0.00638033	-0.100933	-0.00732955
	0.00457264	0.010237	0.075828	-0.125992		-0.0018647	-0.0145588	-0.112004	-0.00955385
	-0.0129352	0.0349264	0.123369	-0.178944		0.00955288	0.00200322	-0.116373	-0.00402569
	-0.0307957	0.03592	0.131629	-0.179929		0.0250632	0.0244097	-0.110921	0.0212978
	-0.046307	0.0337661	0.0862614	-0.113714		0.044092	0.0383498	-0.109958	0.0512492
	-0.0454826	0.0285188	0.00764676	-0.014405		0.0756464	0.0418205	-0.117092	0.0544921
	-0.0213677	0.0121411	-0.0675494	0.0644794		0.0874401	0.0276252	-0.128501	0.0283388
	0.0184454	-0.0142596	-0.110558	0.0941348		0.0563245	0.00923924	-0.128361	-0.00437544
	0.0566539	-0.0455473	-0.109116	0.0858182		0.00749674	0.0133801	-0.0913142	-0.0217919
	0.0744636	-0.0683174	-0.0816416	0.0684061		-0.0338459	0.0271317	-0.0215128	-0.0144372
	0.0602663	-0.0597282	-0.0607588	0.0483192		-0.0582	0.0228003	0.036099	0.0147845
	0.0311502	-0.025792	-0.0479699	0.0132087		-0.0523267	0.00684484	0.039253	0.0445146
	0.0192657	-0.00439695	-0.0232129	-0.0330682		-0.020008	-0.00424706	-0.0089762	0.0618908
	0.0250162	-0.012774	0.00883469	-0.0639702		0.00242516	-0.0113609	-0.0741783	0.0831965
	0.0213903	-0.0319707	0.02386	-0.0601182		-0.00155864	-0.00314931	-0.124237	0.119859
	-0.000572315	-0.0439191	0.0135337	-0.0301092		-0.013976	0.0219064	-0.147355	0.142846
	-0.0243422	-0.0362486	-0.0131746	-0.00290531		-0.018078	0.0280376	-0.154825	0.128185
	-0.0380034	-0.00422318	-0.0351832	0.000895435		-0.0156094	-0.000325086	-0.162227	0.0909803
	-0.0408274	0.0224792	-0.0361765	-0.00427208		-0.0122992	-0.0244846	-0.169778	0.05628
	-0.0419222	0.00957831	-0.0262088	0.0115436		-0.0128811	-0.0206529	-0.169236	0.0380793
	-0.0581292	-0.0241583	-0.0318442	0.0452432		-0.0208859	-0.00989672	-0.164736	0.0453364
	-0.0894873	-0.0419725	-0.051237	0.0715113		-0.0227144	-0.00929781	-0.169007	0.0646456
	-0.102116	-0.0476656	-0.0552046	0.0620593		-0.00817967	-0.0195481	-0.183158	0.0640426
	-0.0731279	-0.0539131	-0.0372233	0.0120593		0.0134829	-0.0393102	-0.191745	0.0441549
	-0.0245101	-0.05283	-0.0221035	-0.0458696		0.0221808	-0.045317	-0.178734	0.0367777
	0.0095295	-0.045073	-0.0331294	-0.0641688		0.0129828	-0.0146775	-0.139475	0.0498389
	0.012494	-0.0338036	-0.0684891	-0.0456788		4.05235e-05	0.0287498	-0.0864392	0.0712395
	-0.00836999	-0.0124325	-0.10324	-0.0353874		-0.0046741	0.0451832	-0.0452023	0.0983812
	-0.0263038	0.0088705	-0.0996774	-0.0613286		0.0016156	0.0438535	-0.0402791	0.117235
	-0.0181028	0.00147624	-0.0490485	-0.109704		0.00852355	0.0527608	-0.0642892	0.105918
	0.00858121	-0.0316795	0.0117874	-0.145451		0.000712574	0.0686376	-0.087063	0.0764477
	0.0282299	-0.0567561	0.0495305	-0.139679		-0.0201385	0.0771738	-0.0964802	0.0619402
	0.0400652	-0.0641431	0.0689463	-0.106127		-0.0323386	0.0725768	-0.109913	0.0671474
	0.0574738	-0.0675095	0.0841157	-0.0959112		-0.0200156	0.0568767	-0.133204	0.0841266
	0.0768285	-0.0732149	0.097568	-0.131924		0.00917888	0.0458476	-0.147915	0.110977
	0.082882	-0.0803885	0.103362	-0.177624		0.0393446	0.0576988	-0.137334	0.139461
	0.0607142	-0.0810446	0.0909075	-0.184762		0.0608628	0.0781734	-0.0924882	0.154041
	0.00919332	-0.0585219	0.0597471	-0.145745		0.0665178	0.0767267	-0.028771	0.159391
	-0.0422535	-0.0163297	0.0336449	-0.0867744		0.0563442	0.0507939	0.00865955	0.160696
	-0.0568857	0.0126521	0.0331544	-0.043219		0.0396901	0.0220323	-0.00856774	0.148851
	-0.0410054	0.00919856	0.0494191	-0.0361281		0.0129106	0.00507608	-0.0579991	0.122369
	-0.0358214	-0.0132638	0.0630983	-0.0535243		-0.0331709	-0.00257953	-0.104951	0.0954738
	-0.0574585	-0.0366284	0.0706511	-0.0683969		-0.0737232	-0.0116599	-0.139533	0.0741631
	-0.0849514	-0.0496208	0.0804909	-0.0766311		-0.0688	-0.0279787	-0.159952	0.0564513
	-0.0932802	-0.0491469	0.0977346	-0.0870283		-0.0227145	-0.0426011	-0.172516	0.0472657
	-0.0663389	-0.0463743	0.10926	-0.0959547		0.0266314	-0.0318723	-0.186879	0.0475351
	-0.0140158	-0.0510793	0.0930593	-0.09019		0.0617281	0.0173932	-0.186997	0.0485035
	0.0240541	-0.0540194	0.0450944	-0.058811		0.0735979	0.0832469	-0.148336	0.0487919
	0.0237716	-0.0459435	-0.00202776	-0.00412597		0.0530835	0.120591	-0.0861064	0.0544092
	0.00704063	-0.0268714	-0.00716821	0.0379363		0.0224877	0.106388	-0.0485218	0.0632044
	0.00433922	-0.0053675	0.034953	0.0329604		0.0115544	0.0565384	-0.053717	0.0673776
	0.0134388	0.00583911	0.0928014	-0.0113285		0.0069353	0.00428812	-0.0844682	0.0694388
	0.0141405	-0.000797008	0.127635	-0.0465388		-0.000871027	-0.02177	-0.113605	0.0743147
	-0.000975889	-0.0164904	0.124822	-0.0458542		0.0142478	-0.0171153	-0.116056	0.0761216
	-0.0256535	-0.021801	0.100729	-0.0195239		0.0556609	-0.00747971	-0.0896036	0.0709324
	-0.0446105	-0.00918831	0.0839159	-0.00304561		0.0876985	-0.0119744	-0.0657476	0.0681673
	-0.0395845	0.00854169	0.0825348	-0.01869		0.0942645	-0.0147877	-0.0686287	0.0732313
	-0.0158945	0.0115075	0.0837736	-0.045604		0.0830154	0.000562641	-0.0780416	0.0780852
	-0.00102565	-0.00271751	0.0746619	-0.0446651		0.0466757	0.0149487	-0.0712039	0.0773311
	-0.00615586	-0.0166451	0.0573757	-0.00760371		-0.00163325	0.0101223	-0.0579106	0.063846
	-0.0111658	-0.0200484	0.0547735	0.037801		-0.0249543	-0.00374935	-0.0517117	0.028916
	0.00414967	-0.0178926	0.0871074	0.060369		-0.0234687	-0.0175079	-0.0590456	-0.0183196
	0.0291838	-0.0153468	0.138465	0.0459445		-0.0180281	-0.0285148	-0.0767831	-0.0464317
	0.0428171	-0.019169	0.171195	0.00468806		-4.03394e-05	-0.0304507	-0.0851565	-0.0410123
	0.0332126	-0.0316671	0.166755	-0.0374275		0.0385364	-0.0338953	-0.0648366	-0.00885484
	0.00326814	-0.0374568	0.138538	-0.0651111		0.0668453	-0.0614309	-0.0350856	0.0381462
	-0.0229599	-0.0252647	0.111894	-0.0822047		0.0703645	-0.0927231	-0.0306228	0.0761505
	-0.0169621	-0.0151365	0.104934	-0.0929737		0.0680924	-0.0889617	-0.0517411	0.0717022
	0.0175217	-0.0302458	0.106953	-0.0926685		0.0633051	-0.0597617	-0.0762806	0.0270193
	0.0352092	-0.0608359	0.0992199	-0.0737822		0.0470332	-0.033684	-0.0925698	-0.0203686
	0.00733145	-0.0853574	0.0881657	-0.0395654		0.0281373	-0.0118492	-0.101138	-0.0452856
	-0.0385722	-0.095218	0.0926522	-0.00142743		0.018984	0.00689166	-0.106423	-0.048981
	-0.0590414	-0.0830939	0.108813	0.0202069		0.0140046	0.0178596	-0.114436	-0.0373284
	-0.0446301	-0.0535627	0.116934	0.0221055		0.0135988	0.0370373	-0.120015	-0.0224308
	-0.0155685	-0.0323858	0.105818	0.0165449		0.020134	0.0683444	-0.106633	-0.0148683
	-0.00193452	-0.0270515	0.077981	0.0199454		0.026502	0.0765058	-0.0722363	0.000258668
	-0.0186159	-0.0161383	0.0537734	0.034441		0.0264414	0.0497983	-0.0384099	0.0385904
	-0.039674	0.000897873	0.0598245	0.0572396		0.0260611	0.0198775	-0.0189641	0.0720745
	-0.0282742	0.00567303	0.0972961	0.0782371		0.029954	0.0078953	-0.000770637	0.0654382
	0.0124072	0.00309142	0.134087	0.0862054		0.0313931	0.00395751	0.0350139	0.0305651
	0.0484492	0.00268803	0.148273	0.0827367		0.0325784	0.00333797	0.0829406	-0.00302667
	0.0629014	-0.00692977	0.152963	0.0693419		0.0417568	0.000484239	0.11457	-0.0190786
	0.0593652	-0.0212072	0.168527	0.0364824		0.0586032	-0.016464	0.0964527	-0.00625855
	0.0457681	-0.0165403	0.196234	-0.00966895		0.0711635	-0.0300994	0.0251128	0.0320303
	0.0370532	0.00266647	0.220046	-0.0421454		0.0691277	-0.013409	-0.0551264	0.0633425
	0.0350514	0.0196705	0.214165	-0.0436305		0.0561917	0.0209777	-0.0894843	0.0742399
	0.0276248	0.0345105	0.168541	-0.0177536		0.0409108	0.0389248	-0.0738634	0.0851996
	0.0201382	0.0412576	0.114269	0.0186189		0.0324015	0.0387077	-0.053994	0.104549
	0.0319584	0.027377	0.0899731	0.0349855		0.0288666	0.0331523	-0.0617561	0.114314
	0.061507	0.00663087	0.0908475	0.011013		0.0154368	0.0211305	-0.0825203	0.110616
	0.083435	0.00420943	0.0866894	-0.0364687		-0.0127541	0.00369027	-0.083759	0.102481
	0.0801672	0.0160639	0.0632159	-0.0740126		-0.0383929	-0.0176124	-0.0533508	0.0935555
	0.0485139	0.0269361	0.0329827	-0.0877875		-0.0450467	-0.045652	-0.0124231	0.0945484
	0.00146528	0.0323058	0.0202342	-0.0825403		-0.0334786	-0.0702864	0.000463298	0.116246
	-0.0267747	0.0271039	0.0362936	-0.0696051		-0.00642507	-0.0730847	-0.0337675	0.138163
	-0.0206311	0.0136558	0.0551045	-0.0618319		0.0283346	-0.0550965	-0.0855364	0.132274
	-0.00776504	0.00628217	0.0480791	-0.0545731		0.0458581	-0.0367944	-0.111935	0.106278
	-0.0123501	0.00853827	0.0287748	-0.0320872		0.0326621	-0.0295402	-0.108973	0.0869527
	-0.0252179	0.008458	0.0395626	0.00614193		0.0127598	-0.0292843	-0.0983861	0.0813528
	-0.0320937	0.004877	0.0945968	0.0304344		0.00400016	-0.0251979	-0.0940133	0.0852813
	-0.0288424	0.00343274	0.158883	0.020181		-0.00178557	-0.00911886	-0.0972535	0.0900983
	-0.0145092	0.00236899	0.181122	-0.0160707		-0.00414578	0.0206776	-0.105551	0.0850577
	-0.000422436	-0.00367265	0.141236	-0.0471238		0.00339366	0.0497053	-0.105448	0.0748889
	-0.00598339	-0.0183317	0.0702176	-0.0533812		0.00785585	0.0576294	-0.098806	0.0796053
	-0.0231883	-0.0454374	0.017868	-0.0357765		0.00951024	0.0468189	-0.10525	0.101551
	-0.0261851	-0.0749589	0.00907123	-0.0192234		0.0335461	0.0356616	-0.123754	0.120603
	-0.013629	-0.0853825	0.0266036	-0.0131412		0.0700356	0.0225965	-0.127387	0.125088
	-0.00161822	-0.0706923	0.0380425	0.00436105		0.0815772	-0.00690656	-0.103521	0.122952
	0.00127161	-0.0467064	0.0340384	0.0492831		0.0721755	-0.0456232	-0.0663596	0.125835
	-0.00658729	-0.0352472	0.0351694	0.102845		0.0690758	-0.0695255	-0.0354989	0.135491
	-0.0174593	-0.0458663	0.0613781	0.126702		0.0663167	-0.0649012	-0.0296505	0.147086
	-0.0135177	-0.0634567	0.105413	0.0950842		0.0610014	-0.0325295	-0.0480233	0.146882
	0.00715081	-0.0628699	0.140723	0.016938		0.0690851	0.00683903	-0.0501057	0.121863
	0.0158717	-0.0374703	0.145655	-0.0642107		0.0742911	0.0164073	-0.00282217	0.0794837
	-0.0100696	-0.00556983	0.120405	-0.114103		0.0530152	-0.0136089	0.0662022	0.0491966
	-0.0483323	0.00695491	0.0826366	-0.136643		0.0279631	-0.0486556	0.0988557	0.0433752
	-0.0645789	-0.00706943	0.0427015	-0.140973		0.0263093	-0.0557428	0.076551	0.0497784
	-0.0547622	-0.0291646	-0.00156939	-0.126588		0.0293762	-0.0441089	0.0231913	0.0593955
	-0.0377074	-0.0347665	-0.0466272	-0.100442		0.0250032	-0.0301237	-0.0277566	0.0729952
	-0.0275022	-0.0240716	-0.0662711	-0.070857		0.0279951	-0.0161542	-0.0509704	0.085311
	-0.0226518	-0.0128111	-0.0382232	-0.0419336		0.0315816	-0.00976203	-0.0492426	0.0934928
	-0.0190573	-0.00569652	0.028678	-0.0187125		0.0233716	-0.00844961	-0.0472584	0.0929588
	-0.0113616	-0.00319393	0.0966249	-0.00895262		0.0161241	0.00620711	-0.0505016	0.0686544
	-0.00341265	-0.00563508	0.124365	-0.00841738		0.0211484	0.0232186	-0.0358779	0.0211106
	-0.0133265	0.000527585	0.0994	-0.0111933		0.0258201	0.00813173	-0.00114614	-0.011522
	-0.0425538	0.0199751	0.0493339	-0.00682445		0.0320939	-0.0311062	0.0233634	-0.00144471
	-0.0612109	0.0305183	0.0116181	0.0111257		0.0530653	-0.0576031	0.0136453	0.0316965
	-0.0444709	0.0193696	-0.0134122	0.0388291		0.0759427	-0.0661562	-0.0268175	0.0578464
	-0.00836682	0.00716189	-0.0454887	0.0589052		0.078556	-0.0622149	-0.0719104	0.071021
	0.0156385	0.00881941	-0.0790734	0.062059		0.063472	-0.0458571	-0.0839084	0.0735562
	0.0183768	0.0173548	-0.0859609	0.0492571		0.0453441	-0.0375981	-0.0493184	0.0748862
	0.00839228	0.0303008	-0.0520273	0.0185239		0.030083	-0.0513709	-0.00217517	0.0956758
	0.00411957	0.0407329	0.00889392	-0.0267118		0.0236285	-0.0534367	0.00929689	0.124946
	0.0229	0.0313265	0.0614919	-0.0712689		0.0249239	-0.0203889	-0.017223	0.125707
	0.0520662	0.013564	0.0708905	-0.100438		0.023036	0.0145031	-0.0419998	0.0955438
	0.0616728	0.0178953	0.0426051	-0.104447		0.015982	0.024147	-0.0351677	0.0692351
	0.0549179	0.0376955	0.0219135	-0.0846911		0.0138834	0.020027	-0.0068554	0.0627688
	0.0566979	0.047606	0.0367747	-0.0592214		0.0237822	0.0149205	0.0125556	0.0803632
	0.0690946	0.0478167	0.0697414	-0.0494041		0.0341368	0.00887846	0.00094164	0.124999
	0.0742915	0.0428327	0.0908184	-0.0486603		0.0308414	0.0103572	-0.0347466	0.17295
	0.0613443	0.0246808	0.0880016	-0.0434551		0.0117097	0.0176056	-0.0607174	0.194561
	0.029711	0.00240244	0.067258	-0.0347175		-0.0126912	0.0152707	-0.0585927	0.203348
	-0.00648344	-0.0062742	0.056026	-0.0247483		-0.0292332	0.0102623	-0.0475748	0.220058
	-0.0186032	-0.0108728	0.0745347	-0.0198548		-0.0342693	0.0180064	-0.0453528	0.228525
	-0.00384917	-0.0197411	0.103021	-0.0378422		-0.0320914	0.0263609	-0.0432688	0.211753
	0.00920434	-0.0197878	0.10479	-0.0758476		-0.0314725	0.016428	-0.0264891	0.184264
	0.00614776	-0.00882715	0.0817482	-0.0962616		-0.0303725	-0.00560882	0.00207395	0.162879
	-0.0035915	0.00364021	0.0645254	-0.076862		-0.0227006	-0.0256858	0.0258051	0.153557
	-0.0095143	0.0196764	0.0670499	-0.0257478		-0.0161471	-0.0388653	0.0234033	0.15882
	-0.00624018	0.040477	0.0733666	0.0331006		-0.0203583	-0.0359929	-0.0129411	0.164174
	0.00745737	0.0512362	0.0595846	0.0688408		-0.027032	-0.016501	-0.0515684	0.143162
	0.0189107	0.0450625	0.0222653	0.0589845		-0.0288528	0.00320422	-0.0532975	0.105597
	0.0133138	0.0263241	-0.00656523	0.0240466		-0.0312698	0.00783902	-0.0241421	0.0893425
	-0.000646047	-0.00444169	0.00991673	0.0010819		-0.0320325	0.000684892	-0.0137937	0.102228
	-0.00814105	-0.0379202	0.0649101	0.00183614		-0.024499	-0.00470832	-0.041134	0.122883
	-0.00782313	-0.0498962	0.119497	0.00823946		-0.0175231	-0.00300571	-0.0780803	0.142064
	0.00428364	-0.0315063	0.143245	0.00350489		-0.0153729	0.00109534	-0.0932221	0.158959
	0.0248571	-0.00148994	0.130956	-0.017431		-0.0024221	0.000567125	-0.0763857	0.165795
	0.02789	0.0145077	0.0965647	-0.03885		0.0193174	-0.00842929	-0.0470567	0.164108
	0.00268198	0.00315822	0.0574227	-0.0366609		0.0303952	-0.0206833	-0.0403359	0.155173
	-0.0246328	-0.0256139	0.0188162	-0.00615145		0.0379092	-0.0210559	-0.0631316	0.131062
	-0.0316771	-0.0455033	-0.0239116	0.0316767		0.0549716	-0.00679973	-0.0747201	0.100463
	-0.0274293	-0.0426344	-0.0693229	0.0566011		0.0625579	0.000669545	-0.0474442	0.0951539
	-0.0235242	-0.031074	-0.101538	0.0628522		0.0540531	-0.00440386	-0.0100618	0.127047
	-0.0223267	-0.0329758	-0.10128	0.0477724		0.0549677	-0.00453026	-0.00570187	0.171039
	-0.0270033	-0.0492496	-0.0638062	0.0135732		0.0607747	0.00254332	-0.0501821	0.188409
	-0.0336174	-0.0640112	-0.0112542	-0.0262845		0.0455134	0.00472016	-0.120801	0.160049
	-0.0344479	-0.0631994	0.030535	-0.0614446		0.0234851	0.000987014	-0.166795	0.100306
	-0.0374786	-0.045887	0.0566582	-0.0820621		0.0196066	-0.00680831	-0.149098	0.0496867
	-0.0537066	-0.0264874	0.0775811	-0.0800683		0.0197636	-0.0208705	-0.0871861	0.0391633
	-0.0741801	-0.0192394	0.0936011	-0.0631597		0.0193016	-0.0294564	-0.032838	0.056659
	-0.08145	-0.0233818	0.0970512	-0.0458561		0.0326155	-0.0272597	-0.00454474	0.0588603
	-0.0752352	-0.0209108	0.0820659	-0.027283		0.0378432	-0.0343098	0.011652	0.0289776
	-0.0707508	0.00445242	0.055293	0.00434527		0.0121708	-0.0567299	0.0236753	-0.00525985
	-0.069248	0.0425671	0.0428972	0.0438034		-0.0206005	-0.0661368	0.0283064	-0.0120023
	-0.0629089	0.0652817	0.0644259	0.0785381		-0.0379651	-0.0452637	0.023841	0.0121589
	-0.05454	0.0653743	0.0999802	0.0839435		-0.0557209	-0.012276	0.0102718	0.0568067
	-0.0513006	0.0600555	0.106466	0.0380582		-0.070459	0.0118675	-0.00360311	0.0998326
	-0.0559619	0.0627077	0.0685168	-0.0493396		-0.0579979	0.0149255	-0.00604377	0.122103
	-0.0682976	0.071327	0.00501014	-0.129312		-0.0308535	-0.0176567	-0.00852397	0.134422
	-0.0848551	0.0776018	-0.0508588	-0.155553		-0.0153187	-0.0634314	-0.0378194	0.157736
	-0.0894262	0.0650389	-0.0710834	-0.117697		-0.00971427	-0.0768808	-0.0891875	0.178731
	-0.0707883	0.0288943	-0.056573	-0.0476967		-0.00711531	-0.0615246	-0.120549	0.164021
	-0.0436239	-0.00371851	-0.0335485	0.00454501		-0.015372	-0.0635663	-0.0996881	0.108891
	-0.0236399	-0.0174348	-0.0142301	0.0153888		-0.0299174	-0.091108	-0.0417621	0.0335176
	-0.0076958	-0.0344033	0.0133837	0.000703073		-0.0400837	-0.120465	0.0090725	-0.0293594
	0.00704833	-0.0628965	0.0483865	-0.0186186		-0.0519794	-0.142365	0.0167918	-0.0463347
	0.0119739	-0.0796048	0.0708953	-0.0393452		-0.0646765	-0.140705	-0.0131202	-0.0114981
	0.00742497	-0.0757505	0.0665574	-0.0709812		-0.0629836	-0.107091	-0.0354515	0.0350956
	0.00241182	-0.0585962	0.0289835	-0.10998		-0.0470063	-0.078671	-0.0106382	0.0639219
	-0.0086934	-0.0285435	-0.0300637	-0.139783		-0.0342296	-0.0898969	0.0454214	0.088332
	-0.0345803	0.00148162	-0.0705743	-0.137417		-0.0289785	-0.114915	0.0773771	0.119891
	-0.0634121	0.00741889	-0.0596424	-0.0997456		-0.0250118	-0.116642	0.0531346	0.145152
	-0.0813604	-0.0032713	-0.0150011	-0.0533964		-0.0221994	-0.0940629	-0.00644128	0.16088
	-0.087606	-0.00609793	0.027945	-0.0251855		-0.0190509	-0.0603175	-0.0514353	0.16605
	-0.0778412	-0.00582492	0.055435	-0.0184158		-0.012916	-0.0361506	-0.0450436	0.146829
	-0.055149	-0.0122065	0.068987	-0.021886		-0.00403334	-0.0470791	0.00577069	0.11196
	-0.0379138	-0.0174277	0.074017	-0.0285667		0.00125374	-0.0832497	0.0541789	0.0974361
	-0.0329793	-0.0253621	0.0784908	-0.0318935		0.000935455	-0.100057	0.0623813	0.109477
	-0.0302811	-0.044885	0.0767876	-0.0419758		-0.00122414	-0.0782281	0.0439582	0.125885
	-0.0261022	-0.0592844	0.0555345	-0.0726053		-4.75589e-05	-0.0462617	0.0368574	0.137338
	-0.0258466	-0.0508806	0.0251201	-0.111131		0.00888061	-0.0271425	0.046257	0.145144
	-0.0290016	-0.0387063	0.00977352	-0.130194		0.0213876	-0.0199284	0.0499614	0.148147
	-0.0391105	-0.0392805	0.0126367	-0.125804		0.0273279	-0.0174046	0.0339099	0.157309
	-0.062303	-0.0394063	0.0222044	-0.103897		0.0212168	-0.011355	0.00724201	0.176271
	-0.0838322	-0.032489	0.0347483	-0.0718658		0.00961262	6.68788e-05	-0.00970538	0.176215
	-0.0865772	-0.0258477	0.0483635	-0.0454036		-0.000966712	0.000147827	-0.000529489	0.135269
	-0.0766081	-0.0215714	0.0625264	-0.0347994		-0.0164044	-0.0201885	0.0168229	0.0796962
	-0.0693563	-0.0223937	0.0797612	-0.028997		-0.0393076	-0.0327034	0.00165399	0.0482311
	-0.0727836	-0.0289613	0.0914901	-0.0224451		-0.0574033	-0.0113988	-0.0457361	0.0460446
	-0.0887859	-0.0264043	0.0803461	-0.0204849		-0.0646088	0.0266426	-0.0754484	0.0595969
	-0.106944	-0.0059665	0.0451	-0.0221204		-0.0678483	0.0423296	-0.0539087	0.0772493
	-0.10372	0.0145551	0.00630691	-0.0245246		-0.0659331	0.0157664	-0.000244016	0.0937178
	-0.0757732	0.0194661	-0.014592	-0.03443		-0.0606431	-0.0356288	0.0468106	0.115847
	-0.0488315	0.0139535	-0.0108175	-0.0501152		-0.0711134	-0.0741381	0.062387	0.155997
	-0.0333529	0.00855385	0.00806229	-0.0603059		-0.0985918	-0.0769833	0.0506004	0.19753
	-0.0171834	0.0098167	0.0197393	-0.0614225		-0.109205	-0.0578039	0.054499	0.20693
	0.00160025	0.0175386	0.0174455	-0.0608539		-0.087353	-0.0479843	0.103129	0.177403
	0.0150833	0.0171694	0.0155931	-0.0633409		-0.0509225	-0.0579517	0.162281	0.136257
	0.0162352	-0.00435529	0.0292393	-0.0758177		-0.0092659	-0.0636553	0.173607	0.107542
	-0.00482708	-0.0396079	0.0481157	-0.10198		0.0323529	-0.0437308	0.127703	0.0993399
	-0.0466187	-0.070162	0.0508918	-0.131977		0.0526916	-0.0147235	0.0611043	0.103491
	-0.0789556	-0.0837191	0.0295202	-0.15026		0.0526802	-0.00265736	0.0171248	0.102174
	-0.0743091	-0.0859406	0.00217766	-0.147843		0.05804	-0.0152083	0.0205368	0.0910792
	-0.0465387	-0.088839	-0.00338925	-0.12238		0.0604478	-0.0461265	0.0459207	0.0950081
	-0.0281083	-0.0973669	0.015102	-0.0757738		0.041276	-0.0737991	0.0417419	0.132617
	-0.0275144	-0.103801	0.027574	-0.0336199		0.0218676	-0.0732968	0.00149795	0.184652
	-0.035075	-0.0966405	0.00858247	-0.0160088		0.0189099	-0.0544066	-0.0267684	0.21106
	-0.0411785	-0.0742131	-0.0330219	-0.0229541		0.00648796	-0.0461126	-0.0126124	0.200178
	-0.0411455	-0.0490333	-0.0673558	-0.0434056		-0.0214609	-0.0464014	0.0249562	0.173185
	-0.0421735	-0.0330521	-0.0716433	-0.063117		-0.0384268	-0.0347927	0.0546121	0.153726
	-0.0572741	-0.0231769	-0.054289	-0.0635459		-0.0450649	-0.0175119	0.0572188	0.150756
	-0.0816153	-0.00764682	-0.0455356	-0.0446163		-0.0478225	-0.0040311	0.0351226	0.150847
	-0.0840083	0.00660203	-0.0527485	-0.024741		-0.0313421	0.00773625	0.0140053	0.128519
	-0.0484901	0.00061781	-0.0495951	-0.0128273		-0.00243894	0.0106893	0.00748919	0.0805943
	-0.00643023	-0.0250492	-0.0161086	-0.00897931		0.00506996	-0.00254792	-0.00605502	0.0394929
	0.00485663	-0.053768	0.0354595	-0.0147536		-0.00806743	-0.013047	-0.0447139	0.0232523
	-0.0176423	-0.0745772	0.0733606	-0.0244872		-0.014594	-0.0101263	-0.083901	0.0201809
	-0.0519619	-0.0804706	0.0702511	-0.0334778		-0.0155994	-0.0202558	-0.0912517	0.0240873
	-0.0756483	-0.0675814	0.0305199	-0.0414682		-0.0182987	-0.0491804	-0.0630791	0.0403334
	-0.0818458	-0.0499237	-0.00336744	-0.0466756		-0.0167966	-0.0659192	-0.0237969	0.0653863
	-0.0861505	-0.0414112	0.00265633	-0.0422315		-0.0140934	-0.054874	-0.00900398	0.0996794
	-0.1122	-0.0284719	0.0435053	-0.0342931		-0.0184945	-0.0217892	-0.0326853	0.143542
	-0.146197	-0.00669514	0.0934075	-0.0357299		-0.0173206	0.024858	-0.0665636	0.176017
	-0.144005	-0.00135144	0.13294	-0.0564156		0.00152714	0.0472873	-0.0731146	0.171993
	-0.0973661	-0.0183133	0.146364	-0.0962905		0.0218139	0.00690719	-0.0557391	0.143343
	-0.0477119	-0.0382091	0.133056	-0.134803		0.0276232	-0.0576855	-0.0483378	0.119248
	-0.0292448	-0.0558315	0.108894	-0.14847		0.0236096	-0.0743355	-0.0654082	0.108629
	-0.0391037	-0.0619939	0.0847625	-0.130579		0.0211604	-0.0388787	-0.0799581	0.106813
	-0.0549358	-0.0317993	0.0618522	-0.100679		0.0197585	0.00225913	-0.0568337	0.107234
	-0.0530845	0.0244226	0.0511897	-0.0764282		0.0150089	0.0154061	-0.00101925	0.0889983
	-0.0311767	0.0608596	0.0613895	-0.0630477		0.00427263	-0.00679768	0.0429174	0.0466351
	-0.0214128	0.0601847	0.0768933	-0.0501855		-0.0106679	-0.0437826	0.0333911	0.0158945
	-0.0520832	0.0376472	0.0802975	-0.0196899		-0.0124322	-0.0513881	-0.0304389	0.0261259
	-0.100143	0.00306507	0.0709587	0.0332192		0.0141409	-0.0197141	-0.0971666	0.0558343
	-0.121678	-0.0254903	0.0544142	0.0804609		0.0603396	0.0109986	-0.108856	0.0791694
	-0.100475	-0.0292266	0.0408094	0.0846573		0.0968689	0.0130535	-0.0612126	0.0949161
	-0.0498653	-0.0265229	0.0444484	0.0375383		0.10418	0.00250614	-0.00474948	0.0998132
	-0.00684525	-0.0449311	0.0622667	-0.0369448		0.0872343	0.00288892	0.019474	0.0919814
	-0.00271717	-0.0763819	0.0732516	-0.107528		0.0640745	0.0156605	0.0102587	0.081432
	-0.024933	-0.101475	0.0726338	-0.150612		0.0537317	0.0331969	-0.0172255	0.0640244
	-0.0349494	-0.12036	0.0762832	-0.17079		0.0600074	0.0400313	-0.0498482	0.0268844
	-0.0282984	-0.129307	0.0935557	-0.187564		0.0676826	0.0204762	-0.0824088	-0.00796784
	-0.0367637	-0.116985	0.122533	-0.198363		0.0626497	-0.0119384	-0.125832	-0.00631219
	-0.0682565	-0.091796	0.152262	-0.177785		0.0539573	-0.0274254	-0.183752	0.0279451
	-0.0952307	-0.0642142	0.162529	-0.13003		0.0519979	-0.0221421	-0.223835	0.0630833
	-0.0934192	-0.035652	0.145762	-0.0845521		0.0457936	-0.0165889	-0.212001	0.0800143
	-0.0610844	-0.0187209	0.123688	-0.0667419		0.025044	-0.0177989	-0.163412	0.0743462
	-0.026356	-0.0305482	0.113927	-0.0801187		-0.00218475	-0.0189517	-0.118016	0.058606
	-0.030473	-0.0619219	0.110105	-0.105554		-0.0308409	-0.0147286	-0.098257	0.0564229
	-0.0769781	-0.0902941	0.099517	-0.117958		-0.0583472	-0.00353104	-0.0982725	0.0714272
	-0.116898	-0.103419	0.0843566	-0.116769		-0.0674029	0.00437309	-0.0928053	0.0749605
	-0.107955	-0.100585	0.071646	-0.120339		-0.0584998	-0.00744426	-0.064676	0.0517844
	-0.0600182	-0.0911921	0.0703752	-0.129608		-0.0545228	-0.0402298	-0.0403355	0.0231207
	-0.0111044	-0.0868155	0.0839655	-0.127155		-0.0502441	-0.0685092	-0.0634225	0.0139465
	0.00625857	-0.0844697	0.101984	-0.0976255		-0.0186154	-0.0693941	-0.117952	0.0186042
	-0.013359	-0.0724346	0.11142	-0.0496082		0.0267549	-0.0507727	-0.14627	0.0194348
	-0.035024	-0.0561236	0.111113	-0.00911521		0.0522773	-0.039071	-0.122382	0.00597977
	-0.0222283	-0.0519713	0.107542	-0.00283416		0.0595737	-0.0468384	-0.0714202	-0.0168209
	0.00895389	-0.0627188	0.106268	-0.0241952		0.0579848	-0.0694202	-0.0288445	-0.0302417
	0.0128865	-0.0735313	0.11107	-0.0381558		0.0426322	-0.0954161	-0.0176088	-0.0215955
	-0.019974	-0.0671325	0.119317	-0.0155477		0.0327827	-0.107599	-0.0289135	-0.00414909
	-0.0576506	-0.0452948	0.120528	0.0340788		0.0507862	-0.100844	-0.0230981	0.00107062
	-0.0716338	-0.0292353	0.10746	0.076177		0.069746	-0.0936666	0.00839353	-0.000125394
	-0.0632583	-0.0359146	0.081183	0.0877198		0.0659955	-0.0874982	0.0211267	0.012018
	-0.0543327	-0.063111	0.0535741	0.0719172		0.0652213	-0.061763	-0.0152286	0.0386765
	-0.0673544	-0.0877641	0.0419386	0.0492229		0.0812801	-0.0209152	-0.0781984	0.064478
	-0.100175	-0.0866704	0.0537444	0.034284		0.0879858	0.00473546	-0.129756	0.0817044
	-0.116885	-0.0630338	0.0760787	0.0185491		0.0772536	0.00300487	-0.1498	0.0881875
	-0.0914529	-0.0421959	0.0886156	-0.00113871		0.0618667	-0.0187797	-0.137849	0.0851011
	-0.0470978	-0.0386879	0.0849225	-0.00763913		0.0346193	-0.0534514	-0.118481	0.0855661
	-0.0289729	-0.0403739	0.0731435	0.0147504		0.00414658	-0.0777366	-0.113882	0.0964403
	-0.0481104	-0.0336201	0.0678744	0.0504204		0.00084425	-0.0700044	-0.112739	0.096412
	-0.0764469	-0.0192589	0.0685182	0.0670299		0.0190281	-0.0444649	-0.0956527	0.0661012
	-0.0893788	-0.00397256	0.0630133	0.0396607		0.0255403	-0.0204294	-0.0740542	0.0187033
	-0.0792568	-0.00495874	0.0496222	-0.018295		0.0182577	0.0121198	-0.0705347	-0.0216535
	-0.0579068	-0.0355075	0.04295	-0.0583972		0.0172548	0.0537625	-0.0874329	-0.0370011
	-0.0528924	-0.0757318	0.0481344	-0.0507911		0.021135	0.0739144	-0.115779	-0.010645
	-0.0722302	-0.0912123	0.0548473	-0.0151151		0.0229408	0.0660602	-0.140213	0.0470579
	-0.0862026	-0.0843762	0.0570299	0.00386385		0.021553	0.0557771	-0.142654	0.0965505
	-0.0682877	-0.0780638	0.0560395	-0.0145049		0.0113081	0.046693	-0.127476	0.114709
	-0.036131	-0.0705678	0.0579546	-0.0530607		-0.01095	0.0339676	-0.121509	0.11293
	-0.0226407	-0.0570081	0.073597	-0.0651194		-0.0294839	0.0339029	-0.131969	0.0946974
	-0.0351098	-0.0438023	0.0991453	-0.0259844		-0.0261746	0.045367	-0.132807	0.0560519
	-0.059692	-0.0228882	0.111984	0.0384678		-0.00702895	0.0397787	-0.103362	0.0104585
	-0.0756402	0.00797582	0.104077	0.0833135		0.0123983	0.0202777	-0.0586999	-0.0247814
	-0.0664836	0.0201713	0.0994471	0.0870909		0.0218387	0.00840205	-0.0276734	-0.050192
	-0.0455623	0.00465723	0.116285	0.0636215		0.0201398	0.00295997	-0.0236432	-0.0620658
	-0.0451854	-0.0119852	0.144614	0.0437242		0.0109529	0.00118359	-0.0340859	-0.0554881
	-0.0634741	-0.0221553	0.162173	0.0387833		0.00188885	0.00639738	-0.0368409	-0.0510575
	-0.064773	-0.0374796	0.150139	0.0260409		-0.00609187	0.00235817	-0.0222152	-0.0621108
	-0.0339536	-0.0538819	0.104232	-0.0206532		-0.0238566	-0.0206906	-0.00775166	-0.0671687
	0.0052605	-0.0654576	0.0474554	-0.0814386		-0.0493706	-0.0316074	-0.0153945	-0.0526349
	0.0232381	-0.0764806	0.00930245	-0.114729		-0.0658499	-0.00790426	-0.0382402	-0.0392461
	0.00491654	-0.0742305	-0.0110582	-0.101944		-0.0614037	0.0265534	-0.0484739	-0.0388501
	-0.0373603	-0.0439133	-0.0233004	-0.0594668		-0.0416785	0.0407601	-0.0393254	-0.0433844
	-0.0626178	-0.0110128	-0.0191346	-0.0125231		-0.0180719	0.0260026	-0.0309089	-0.0525816
	-0.0515968	-0.00662146	0.00641079	0.0165812		0.0019177	-0.00885766	-0.0458931	-0.0623213
	-0.0290918	-0.0238074	0.0371894	0.0283048		0.0136376	-0.0471497	-0.0903879	-0.0547304
	-0.0207966	-0.036798	0.0632974	0.0381559		0.019684	-0.0664312	-0.147442	-0.03295
	-0.0263983	-0.0350402	0.0837788	0.0428951		0.0261907	-0.0611036	-0.176129	-0.0199594
	-0.0329228	-0.0209602	0.0967026	0.0203153		0.0286974	-0.0533436	-0.148809	-0.0206487
	-0.0284784	-0.00656633	0.102085	-0.0290312		0.0208069	-0.0582466	-0.0893922	-0.0227673
	-0.0138577	-0.0117119	0.103592	-0.077384		0.0153352	-0.0631115	-0.0475206	-0.0295938
	-0.0128221	-0.0368804	0.0942845	-0.104661		0.0234781	-0.0487891	-0.0433223	-0.045731
	-0.0443025	-0.0622882	0.0664513	-0.103972		0.0331004	-0.0146556	-0.0591487	-0.0672482
	-0.0859047	-0.0785549	0.0302225	-0.0895259		0.0318996	0.0272341	-0.0731127	-0.0872198
	-0.103124	-0.0866239	0.00722861	-0.0869386		0.0214563	0.0547327	-0.075061	-0.0929575
	-0.0959729	-0.0800928	0.0143129	-0.100209		-0.0027572	0.0505472	-0.0811099	-0.065276
	-0.0850171	-0.0558018	0.0480847	-0.101128		-0.0327136	0.0258114	-0.119977	-0.0088405
	-0.0803728	-0.0190301	0.0808908	-0.0734761		-0.0299214	0.00591214	-0.186435	0.0462216
	-0.0836706	0.0227003	0.0826901	-0.0300103		0.0124299	-0.00649088	-0.231469	0.0807507
	-0.0907037	0.0525916	0.0497439	0.00213274		0.0485353	-0.0259152	-0.22767	0.0950855
	-0.0851629	0.0505143	0.0103038	0.00450488		0.0525419	-0.0521689	-0.198784	0.0880394
	-0.0627862	0.0192171	-0.00606359	-0.0155372		0.0359164	-0.0703373	-0.175062	0.0569975
	-0.0500092	-0.0143785	0.00402561	-0.0308731		7.74614e-05	-0.0771051	-0.161652	0.0175771
	-0.0618479	-0.0295854	0.0189947	-0.0278386		-0.0458957	-0.075594	-0.14577	-0.00952578
	-0.0744984	-0.0303133	0.021224	-0.0196184		-0.0691613	-0.0660769	-0.113052	-0.0191109
	-0.0619588	-0.0332613	0.0144728	-0.0205565		-0.0699989	-0.0538129	-0.0757987	-0.0162203
	-0.0256516	-0.0464884	0.0134005	-0.0239194		-0.0778971	-0.0454266	-0.072662	-0.00261546
	0.00906995	-0.056846	0.0262768	-0.0167648		-0.080016	-0.0310458	-0.120399	0.0193535
	0.0102986	-0.0484791	0.0495263	0.00787935		-0.0470969	-0.00624028	-0.178511	0.0474207
	-0.0278666	-0.0245375	0.0752436	0.0366502		-0.0063917	0.0124668	-0.195678	0.0850485
	-0.0687738	-0.00642475	0.089511	0.0447869		0.00798143	0.0257293	-0.165946	0.128434
	-0.0725385	-0.0190839	0.0838093	0.0126372		0.0016083	0.0467489	-0.120833	0.155876
	-0.0452458	-0.0640646	0.0582092	-0.0411061		-0.0233396	0.0609564	-0.0939195	0.150006
	-0.0272062	-0.111049	0.0241829	-0.075026		-0.0659128	0.0491109	-0.0967746	0.121899
	-0.0338748	-0.131338	0.00352877	-0.0711678		-0.0935428	0.0262205	-0.111346	0.0999691
	-0.0428362	-0.124443	0.0151594	-0.0454082		-0.0864202	0.0106916	-0.106509	0.109448
	-0.0318252	-0.107784	0.0497062	-0.0319193		-0.080362	0.0022842	-0.0855984	0.161102
	-0.00569907	-0.0995093	0.0790803	-0.0520529		-0.0951472	0.00848081	-0.0830935	0.228662
	0.013399	-0.106352	0.092677	-0.0935399		-0.104526	0.0318219	-0.11124	0.260376
	0.00774724	-0.109626	0.0926452	-0.119616		-0.0961924	0.0425469	-0.145957	0.233809
	-0.0252024	-0.0807293	0.0759228	-0.11858		-0.0835961	0.0293226	-0.159681	0.1802
	-0.0597722	-0.0297008	0.0456456	-0.108763		-0.0757019	0.0223719	-0.144954	0.131826
	-0.0678858	0.00268515	0.0104775	-0.10433		-0.0742818	0.0395811	-0.120437	0.0981126
	-0.0580796	0.00336794	-0.0251512	-0.10059		-0.0765018	0.0598041	-0.121828	0.0853065
	-0.0556319	-0.00889037	-0.0510233	-0.0807115		-0.0598337	0.0708353	-0.159381	0.0884439
	-0.0618699	-0.0219595	-0.0518729	-0.0390703		-0.0157131	0.074066	-0.19315	0.0883907
	-0.0607503	-0.0275944	-0.0372005	-0.000643612		0.021532	0.0614448	-0.18496	0.0894113
	-0.0503366	-0.0166494	-0.0281711	0.00610055		0.0134685	0.0433859	-0.146533	0.112675
	-0.0389779	-0.00271941	-0.0263564	-0.0124465		-0.0327015	0.0493099	-0.117866	0.150383
	-0.0351946	-0.00114111	-0.0213744	-0.0245867		-0.0747365	0.0730508	-0.114268	0.182216
	-0.049262	0.00775504	-0.010672	-0.0163147		-0.0834748	0.0827915	-0.120302	0.207548
	-0.0774048	0.037024	0.00873723	0.00837211		-0.0639434	0.0808356	-0.115636	0.222496
	-0.0923881	0.0556258	0.0393229	0.030552		-0.0506799	0.0847045	-0.0967895	0.212497
	-0.080357	0.0454431	0.0702765	0.0404263		-0.0700047	0.0937679	-0.0779211	0.189837
	-0.062274	0.0310399	0.095327	0.0510906		-0.112818	0.111032	-0.0789039	0.182027
	-0.0569102	0.0335725	0.117734	0.0840832		-0.146037	0.136324	-0.0942175	0.191976
	-0.064222	0.0588098	0.133393	0.137588		-0.146902	0.146243	-0.0915997	0.211216
	-0.0792996	0.100371	0.130015	0.191893		-0.127412	0.124226	-0.0520256	0.240209
	-0.0941145	0.127372	0.11286	0.229907		-0.111451	0.091076	0.00132749	0.26132
	-0.0999126	0.109489	0.0937147	0.240726		-0.107695	0.0719022	0.0348391	0.249463
	-0.105654	0.0649964	0.0736171	0.225741		-0.105399	0.0666305	0.0367094	0.217752
	-0.123647	0.0359319	0.0557822	0.206734		-0.0921563	0.0684764	0.0184041	0.201236
	-0.136851	0.0278978	0.0532719	0.203247		-0.0709945	0.074152	0.00520576	0.202846
	-0.123217	0.021388	0.0680309	0.20258		-0.0612699	0.0808133	0.0123836	0.204871
	-0.0857345	0.00419742	0.092149	0.186458		-0.07676	0.0826455	0.0240592	0.191525
	-0.0404421	-0.0280031	0.118395	0.161238		-0.0989845	0.0800134	0.00711218	0.152115
	-0.00963729	-0.06586	0.13326	0.141827		-0.0919957	0.0710435	-0.0348145	0.10217
	-0.0113693	-0.0837641	0.12229	0.129276		-0.0513883	0.050498	-0.0682332	0.0897443
	-0.0348136	-0.0677688	0.0924081	0.118956		-0.0104843	0.0335153	-0.0731385	0.130085
	-0.04986	-0.0361799	0.0667576	0.0988776		0.00461041	0.0467241	-0.0543418	0.17447
	-0.0508031	-0.0111101	0.0668835	0.0588727		-0.00891757	0.0873311	-0.0253575	0.174662
	-0.0581068	0.00275586	0.104079	0.0149336		-0.039029	0.12087	-0.00940627	0.134576
	-0.0787456	0.00767611	0.167645	-0.0064614		-0.0590762	0.119608	-0.0201504	0.0906188
	-0.102953	0.00934081	0.225029	-0.00764672		-0.055991	0.0863851	-0.0312896	0.0717461
	-0.122788	0.0142983	0.249733	-0.00480017		-0.0599714	0.0467572	-0.0188749	0.0807144
	-0.127978	0.016856	0.235695	-0.00769392		-0.094253	0.0355423	-0.00915082	0.0900228
	-0.114038	0.00838761	0.192752	-0.0193223		-0.126681	0.062837	-0.0321153	0.0697328
	-0.0979655	-0.00507851	0.14292	-0.0303627		-0.128136	0.0992165	-0.0789912	0.029051
	-0.095469	-0.0194589	0.109631	-0.0219245		-0.110406	0.107555	-0.119004	0.0047763
	-0.0959084	-0.0358153	0.104092	-0.00346597		-0.0816945	0.0877458	-0.134544	0.013107
	-0.0859435	-0.0493533	0.118584	0.000484563		-0.0466224	0.0668404	-0.128	0.0335095
	-0.0741706	-0.0548603	0.138658	-0.0170771		-0.0313477	0.0570048	-0.121421	0.0418344
	-0.0676073	-0.0561812	0.150005	-0.0372429		-0.0362239	0.0563954	-0.12474	0.0334861
	-0.0638388	-0.0586435	0.150001	-0.0443353		-0.0275697	0.0598371	-0.112765	0.0163974
	-0.0675884	-0.0632019	0.142919	-0.0344086		-0.0142276	0.0546202	-0.0763503	0.000972474
	-0.0801604	-0.0701832	0.132924	-0.0218678		-0.0341451	0.0382706	-0.0511958	-0.0170027
	-0.0870237	-0.0801696	0.122948	-0.0300655		-0.0742832	0.0384851	-0.070831	-0.0592043
	-0.0847811	-0.0928616	0.12311	-0.0581232		-0.091566	0.0684488	-0.122706	-0.125733
	-0.0868657	-0.104148	0.140789	-0.0819601		-0.0857361	0.0968978	-0.17651	-0.16922
	-0.0986501	-0.108784	0.162818	-0.0835054		-0.0714587	0.100214	-0.209519	-0.152104
	-0.110802	-0.110607	0.167201	-0.0752552		-0.0517133	0.0829005	-0.209323	-0.0989172
	-0.116745	-0.112708	0.140109	-0.0820168		-0.0515079	0.0500719	-0.184926	-0.0684815
	-0.120399	-0.109456	0.0824278	-0.116235		-0.0836709	0.0232496	-0.164265	-0.0909952
	-0.116928	-0.103824	0.0184385	-0.166508		-0.109628	0.0308999	-0.156627	-0.153143
	-0.0988323	-0.0994662	-0.0139533	-0.203165		-0.0971011	0.060142	-0.144606	-0.212761
	-0.0741213	-0.081772	0.00107956	-0.208225		-0.0738237	0.0713709	-0.123844	-0.229846
	-0.0575302	-0.0457197	0.0434536	-0.193711		-0.0651045	0.0662173	-0.115304	-0.208568
	-0.0547263	-0.0152766	0.0937282	-0.181239		-0.0607119	0.0651421	-0.133325	-0.190458
	-0.0672619	-0.0061184	0.139911	-0.177202		-0.0545885	0.0587942	-0.173875	-0.195076
	-0.0980563	-0.003449	0.173201	-0.174697		-0.0465134	0.0396459	-0.215934	-0.202788
	-0.134651	0.00058443	0.1919	-0.168553		-0.0338394	0.0259203	-0.231179	-0.198099
	-0.157962	-0.00466404	0.190246	-0.155971		-0.0330503	0.0237165	-0.206336	-0.182204
	-0.165998	-0.0210648	0.15722	-0.148158		-0.0689938	0.0223206	-0.165949	-0.157945
	-0.159891	-0.0467106	0.105903	-0.15457		-0.122339	0.0281919	-0.143278	-0.141549
	-0.13517	-0.0867218	0.071118	-0.178993		-0.147641	0.0447423	-0.143704	-0.153091
	-0.102783	-0.123181	0.0559996	-0.213957		-0.127449	0.0521107	-0.151314	-0.175207
	-0.0868122	-0.126105	0.0392675	-0.243101		-0.0811325	0.0493702	-0.159301	-0.178867
	-0.0918419	-0.105984	0.0165479	-0.247		-0.0420056	0.0510542	-0.178003	-0.176079
	-0.10397	-0.0940879	0.00406973	-0.22674		-0.0288367	0.0382551	-0.219226	-0.189368
	-0.11725	-0.0891401	0.0149609	-0.199595		-0.0351204	-0.0133944	-0.275222	-0.206578
	-0.131696	-0.0798012	0.0551126	-0.169849		-0.0340239	-0.0806566	-0.319982	-0.212606
	-0.137553	-0.0779354	0.105681	-0.137335		-0.017879	-0.128154	-0.325366	-0.207038
	-0.128539	-0.0851944	0.126481	-0.113723		-0.00947881	-0.144814	-0.287667	-0.190848
	-0.112524	-0.0921841	0.102283	-0.108256		-0.0274232	-0.123324	-0.234769	-0.178358
	-0.0949274	-0.111553	0.0609661	-0.121098		-0.0580096	-0.0749791	-0.195064	-0.199251
	-0.0824843	-0.145261	0.0299468	-0.151999		-0.0649805	-0.0370586	-0.172645	-0.24212
	-0.0875494	-0.163721	0.0135568	-0.189705		-0.0339951	-0.0331548	-0.160366	-0.258837
	-0.107997	-0.153776	0.00597228	-0.210775		0.0126455	-0.0492189	-0.156776	-0.235661
	-0.12908	-0.132076	0.000429711	-0.208195		0.0363162	-0.0631299	-0.153508	-0.204955
	-0.145555	-0.111053	-0.00695346	-0.197803		0.014577	-0.0663205	-0.14913	-0.19538
	-0.157678	-0.0960764	0.000665968	-0.189985		-0.0336714	-0.0592272	-0.160614	-0.214297
	-0.154469	-0.0971167	0.0384796	-0.17975		-0.0706348	-0.0526856	-0.198692	-0.251533
	-0.133291	-0.104668	0.0831666	-0.161487		-0.0831345	-0.0608711	-0.24669	-0.276412
	-0.11032	-0.0968142	0.0910462	-0.137674		-0.0896353	-0.0809291	-0.283434	-0.26728
	-0.0996649	-0.0772236	0.0469488	-0.118247		-0.10164	-0.0909104	-0.301129	-0.243355
	-0.113218	-0.0644134	-0.0230315	-0.122975		-0.11024	-0.0767788	-0.297067	-0.231676
	-0.152941	-0.0625183	-0.0682714	-0.151124		-0.109279	-0.0576056	-0.273041	-0.224928
	-0.186448	-0.0668744	-0.0495268	-0.17171		-0.0997712	-0.0573483	-0.243054	-0.204785
	-0.177657	-0.0772118	0.0188477	-0.158659		-0.0821539	-0.0774329	-0.214616	-0.178595
	-0.140397	-0.0914467	0.0842542	-0.131454		-0.07307	-0.10282	-0.185385	-0.164829
	-0.114038	-0.108609	0.113547	-0.120907		-0.08921	-0.116024	-0.162543	-0.171362
	-0.105244	-0.131504	0.117078	-0.140311		-0.107257	-0.107224	-0.164621	-0.192989
	-0.0985713	-0.15564	0.11316	-0.176314		-0.0980639	-0.0919828	-0.186814	-0.216558
	-0.0924623	-0.169615	0.105357	-0.20148		-0.0762788	-0.0979026	-0.214477	-0.23188
	-0.0897744	-0.172611	0.0832577	-0.198979		-0.064854	-0.124223	-0.244823	-0.250202
	-0.0911542	-0.16961	0.0403406	-0.188882		-0.0552492	-0.144134	-0.270587	-0.290071
	-0.103757	-0.159688	-0.0103691	-0.194817		-0.0461463	-0.145178	-0.282555	-0.340923
	-0.126302	-0.144766	-0.0468805	-0.207479		-0.0437594	-0.137356	-0.287017	-0.370247
	-0.139798	-0.132561	-0.0643352	-0.208512		-0.0302452	-0.126363	-0.288268	-0.360634
	-0.135998	-0.128866	-0.075413	-0.19361		-0.00384013	-0.108139	-0.271614	-0.325579
	-0.128932	-0.137877	-0.087352	-0.174435		-0.00700235	-0.0826411	-0.244668	-0.285811
	-0.126002	-0.158521	-0.0935856	-0.163941		-0.0494099	-0.0524826	-0.239433	-0.253829
	-0.119727	-0.181934	-0.079294	-0.16039		-0.0868869	-0.0294764	-0.266684	-0.232288
	-0.110639	-0.199654	-0.0367281	-0.142047		-0.100891	-0.0439664	-0.308664	-0.212194
	-0.106278	-0.208717	0.017979	-0.0962265		-0.10644	-0.0993164	-0.343325	-0.184716
	-0.106393	-0.211652	0.054857	-0.0414494		-0.106924	-0.149894	-0.34831	-0.166636
	-0.114568	-0.212069	0.0539071	-0.00982564		-0.104118	-0.159547	-0.319597	-0.181777
	-0.135439	-0.207746	0.0255735	-0.0223045		-0.113202	-0.144663	-0.288923	-0.219853
	-0.152471	-0.196735	-0.0016886	-0.0721049		-0.113979	-0.124602	-0.290734	-0.248848
	-0.137332	-0.188683	-0.00351093	-0.128302		-0.072998	-0.106247	-0.315633	-0.253994
	-0.088076	-0.19074	0.0137063	-0.165022		-0.0180615	-0.103044	-0.331635	-0.240208
	-0.0385448	-0.190572	0.0230303	-0.17981		0.00177802	-0.104671	-0.325364	-0.224493
	-0.0189358	-0.182667	0.0184361	-0.191672		-0.0115137	-0.0872314	-0.309664	-0.233797
	-0.0324944	-0.174041	0.0222698	-0.207102		-0.0253919	-0.0710931	-0.301621	-0.270705
	-0.0670149	-0.159616	0.0482612	-0.212256		-0.0249185	-0.0872297	-0.313348	-0.297482
	-0.0964554	-0.137736	0.0806293	-0.185839		-0.00556846	-0.109124	-0.334856	-0.285879
	-0.0980392	-0.127269	0.097836	-0.134815		0.0234623	-0.0977104	-0.335687	-0.247234
	-0.0814342	-0.138667	0.0899337	-0.0913609		0.031492	-0.064067	-0.307402	-0.201082
	-0.0756237	-0.161333	0.0707563	-0.0810398		0.0122867	-0.0302215	-0.27834	-0.162347
	-0.0817124	-0.188993	0.0673444	-0.0985601		-0.00621149	-0.00655038	-0.269804	-0.147436
	-0.0783274	-0.214579	0.0831083	-0.118478		-0.00959176	-0.0133547	-0.2713	-0.150374
	-0.0647743	-0.215559	0.0875001	-0.124746		-0.0167981	-0.0502443	-0.263821	-0.141216
	-0.0569804	-0.190029	0.0642781	-0.117402		-0.0377692	-0.0775661	-0.242322	-0.123106
	-0.0625809	-0.1705	0.0282955	-0.104206		-0.0596634	-0.0785661	-0.221648	-0.130804
	-0.0816177	-0.168711	-0.00511294	-0.0887179		-0.0660549	-0.082942	-0.229686	-0.169017
	-0.103286	-0.165122	-0.029093	-0.0628392		-0.0512339	-0.102596	-0.272573	-0.21104
	-0.104181	-0.155046	-0.0390619	-0.0220762		-0.0321028	-0.118772	-0.315776	-0.24293
	-0.0806085	-0.145204	-0.0412712	0.0165432		-0.0345513	-0.120787	-0.323513	-0.260082
	-0.0601523	-0.130717	-0.042775	0.0238747		-0.0692201	-0.106881	-0.298251	-0.265295
	-0.0611678	-0.122788	-0.0364267	-0.00460992		-0.112848	-0.0771431	-0.272746	-0.284196
	-0.0702111	-0.142524	-0.015642	-0.0517724		-0.13306	-0.0608982	-0.263151	-0.323427
	-0.0695063	-0.171459	0.00398801	-0.0973901		-0.123314	-0.0881059	-0.262295	-0.34121
	-0.0584149	-0.175211	0.00777712	-0.126836		-0.0998119	-0.135067	-0.261434	-0.310198
	-0.0426121	-0.164413	-0.00273016	-0.148178		-0.0799095	-0.159071	-0.261576	-0.261824
	-0.0352836	-0.160808	-0.0175825	-0.18181		-0.0642258	-0.152843	-0.26643	-0.235005
	-0.0472561	-0.161035	-0.026659	-0.226816		-0.0424313	-0.133496	-0.280901	-0.23502
	-0.0614118	-0.159412	-0.0211636	-0.253559		-0.00566681	-0.118687	-0.300551	-0.249723
	-0.05504	-0.151049	-0.0117026	-0.248944		0.0361597	-0.115746	-0.307681	-0.260159
	-0.0348551	-0.125731	-0.0264625	-0.226214		0.0504244	-0.113809	-0.292366	-0.253724
	-0.0234111	-0.0936716	-0.0717549	-0.203378		0.0206071	-0.0882725	-0.272874	-0.242661
	-0.0261376	-0.0841981	-0.123101	-0.18096		-0.0286682	-0.0388176	-0.262824	-0.243472
	-0.0359477	-0.0982978	-0.154235	-0.150074		-0.0628668	0.00287474	-0.257045	-0.243965
	-0.0407342	-0.10868	-0.156545	-0.101507		-0.0710747	0.0103895	-0.242543	-0.226746
	-0.0263431	-0.102859	-0.141488	-0.0440034		-0.0595004	-0.00561519	-0.21333	-0.204139
	-0.0037337	-0.0916806	-0.140345	-0.00211679		-0.0463517	-0.0147121	-0.170374	-0.192237
	-0.00197524	-0.0888521	-0.166104	0.00541653		-0.0506126	-0.00890598	-0.134148	-0.182637
	-0.0201779	-0.102487	-0.19013	-0.0135314		-0.0621398	-0.00586417	-0.136772	-0.167308
	-0.0331184	-0.129815	-0.182971	-0.0391204		-0.0485684	-0.0233067	-0.182431	-0.156532
	-0.0307287	-0.156525	-0.150428	-0.0574849		-0.01718	-0.057986	-0.241941	-0.155753
	-0.0195125	-0.17207	-0.114396	-0.0657998		-0.00491834	-0.0800152	-0.282705	-0.165516
	-0.0072809	-0.180335	-0.0867758	-0.0727052		-0.0126702	-0.0605531	-0.294614	-0.186623
	-0.0062804	-0.185487	-0.0616398	-0.0890882		-0.0224256	-0.0209764	-0.28217	-0.211501
	-0.0233273	-0.187723	-0.0309799	-0.110135		-0.0403374	-0.0174395	-0.266218	-0.223177
	-0.0424539	-0.19164	-0.00339975	-0.118101		-0.0643258	-0.0659625	-0.267573	-0.217971
	-0.0482203	-0.201623	0.00208008	-0.107523		-0.0719092	-0.122423	-0.275051	-0.209699
	-0.0552834	-0.211764	-0.0123201	-0.0901503		-0.0701317	-0.137081	-0.26794	-0.206903
	-0.0817603	-0.217838	-0.0279292	-0.0818328		-0.0737196	-0.0960796	-0.260351	-0.208829
	-0.114321	-0.220679	-0.033735	-0.0903295		-0.061137	-0.0308482	-0.273597	-0.213794
	-0.127706	-0.214929	-0.0387482	-0.103997		-0.0272718	0.00218319	-0.300257	-0.221055
	-0.112492	-0.192674	-0.0560232	-0.106324		-0.0132287	-0.0309241	-0.322375	-0.224139
	-0.076229	-0.157278	-0.0872387	-0.0992796		-0.0293706	-0.0927983	-0.331689	-0.221076
	-0.039907	-0.12904	-0.113727	-0.0948885		-0.0485134	-0.117619	-0.318439	-0.223899
	-0.0282552	-0.128001	-0.111602	-0.0983375		-0.0720295	-0.0986365	-0.289331	-0.238449
	-0.0415951	-0.146364	-0.072839	-0.101642		-0.0988885	-0.0797671	-0.261839	-0.257923
	-0.0524207	-0.156016	-0.0139702	-0.101213		-0.0968508	-0.0852108	-0.237983	-0.275925
	-0.0453154	-0.138733	0.0291573	-0.0936732		-0.0663979	-0.103126	-0.207634	-0.280599
	-0.0334427	-0.102483	0.0281272	-0.0815762		-0.0520398	-0.10543	-0.177024	-0.254635
	-0.0265629	-0.0768725	-0.013	-0.0659759		-0.0622668	-0.0659471	-0.165506	-0.207473
	-0.0183263	-0.0849562	-0.0573295	-0.0486874		-0.0706667	-0.00784015	-0.186137	-0.170604
	-0.000822033	-0.109966	-0.073489	-0.0343718		-0.0820602	0.00152848	-0.237102	-0.152074
	0.022233	-0.11575	-0.0669084	-0.0318216		-0.10506	-0.0423508	-0.296813	-0.140051
	0.0443603	-0.107798	-0.0671782	-0.043454		-0.123184	-0.0721497	-0.328273	-0.135756
	0.0573069	-0.123225	-0.0905244	-0.0600075		-0.130062	-0.0549874	-0.309211	-0.145332
	0.0477905	-0.166269	-0.120845	-0.0665627		-0.132968	-0.0155293	-0.259565	-0.160998
	0.0244954	-0.205273	-0.122004	-0.0494618		-0.118209	0.0158807	-0.219143	-0.178947
	0.0198857	-0.208311	-0.0751299	-0.00208658		-0.075293	0.019556	-0.197899	-0.198648
	0.0471223	-0.159705	-0.00198965	0.0712215		-0.0319928	-0.00454063	-0.181633	-0.208009
	0.0822905	-0.0789217	0.0611413	0.152798		-0.0191771	-0.0167781	-0.167339	-0.205069
	0.100262	-0.0156283	0.105499	0.217839		-0.0398556	0.00720339	-0.165806	-0.209747
	0.0987617	0.00972708	0.137026	0.257805		-0.0754395	0.0284064	-0.189335	-0.219583
	0.0874692	0.0236925	0.160237	0.281737		-0.0998547	0.00308673	-0.241241	-0.204641
	0.0852398	0.0363595	0.181552	0.312483		-0.0939834	-0.050355	-0.301495	-0.161768
	0.105063	0.0295985	0.206584	0.364055		-0.0698526	-0.0870969	-0.329694	-0.120877
	0.129253	0.0121322	0.230506	0.428871		-0.0551251	-0.0885001	-0.309316	-0.0998801
	0.131571	0.0157909	0.258418	0.495029		-0.0516554	-0.0599394	-0.260694	-0.101536
	0.121524	0.0456547	0.30299	0.558341		-0.0431087	-0.0291781	-0.212998	-0.129547
	0.126653	0.0953102	0.361479	0.619095		-0.0209512	-0.033228	-0.179376	-0.166174
	0.151649	0.16128	0.422284	0.673784		-0.000510034	-0.0642178	-0.161653	-0.187988
	0.186589	0.215088	0.483219	0.727364		-0.000842489	-0.0770873	-0.159085	-0.206531
	0.221375	0.223981	0.540172	0.778992		-0.0208573	-0.061596	-0.171056	-0.240555
	0.246745	0.203935	0.58083	0.829242		-0.0435939	-0.0522529	-0.200574	-0.279706
	0.263439	0.19637	0.603132	0.889996		-0.0528567	-0.065606	-0.25622	-0.308734
	0.285886	0.213985	0.613402	0.964916		-0.0484879	-0.0902647	-0.319847	-0.32265
	0.309714	0.251513	0.614624	1.03043		-0.0378555	-0.110811	-0.352709	-0.304915
	0.311571	0.297586	0.6163	1.07121		-0.0263804	-0.114183	-0.338792	-0.247656
	0.291004	0.328429	0.640474	1.09874		-0.0116477	-0.104647	-0.295719	-0.186086
	0.270046	0.337206	0.692201	1.13122		0.00574588	-0.107362	-0.243963	-0.156529
	0.266022	0.344478	0.749802	1.18051		0.0121324	-0.136364	-0.206023	-0.148002
	0.28592	0.362539	0.791273	1.24668		-0.00110463	-0.165454	-0.201153	-0.132717
	0.317405	0.383781	0.814813	1.30949		-0.020697	-0.156962	-0.213716	-0.110011
	0.328235	0.404238	0.832746	1.34852		-0.0347758	-0.109816	-0.217018	-0.0943744
	0.30488	0.427844	0.860107	1.36746		-0.0405376	-0.0625786	-0.215084	-0.0988573
	0.274672	0.454016	0.89589	1.3849		-0.02772	-0.0495773	-0.223495	-0.127554
	0.261291	0.481106	0.921572	1.41006		0.00079951	-0.0686059	-0.233517	-0.160772
	0.260032	0.503691	0.927356	1.44479		0.0157139	-0.0898461	-0.229037	-0.166278
	0.266486	0.511241	0.93214	1.48669		0.00479945	-0.0816761	-0.211616	-0.142504
	0.28441	0.503368	0.955524	1.5314		-0.00942226	-0.0445792	-0.19614	-0.1203
	0.314648	0.500214	0.998477	1.58238		-0.0190913	-0.016623	-0.198515	-0.117843
	0.360992	0.519499	1.04282	1.65188		-0.0329544	-0.0209562	-0.225437	-0.13353
	0.420275	0.554688	1.06989	1.7307		-0.0371811	-0.0361965	-0.255995	-0.15613
	0.460989	0.585768	1.07513	1.78579		-0.0253902	-0.0337255	-0.257276	-0.163297
	0.453554	0.602115	1.07554	1.79679		-0.0209192	-0.0165459	-0.228712	-0.139757
	0.413635	0.614056	1.09277	1.77337		-0.021332	0.00148673	-0.210042	-0.107611
	0.382049	0.638469	1.13413	1.74595		-0.00294415	0.00734783	-0.218757	-0.106099
	0.375208	0.675394	1.18691	1.74612		0.0151115	-0.00543456	-0.243434	-0.137368
	0.38694	0.697969	1.22305	1.7867		0.00616669	-0.0183744	-0.271884	-0.165523
	0.407167	0.679618	1.22635	1.83734		-0.0102437	-0.00865486	-0.295927	-0.163469
	0.422039	0.631739	1.207	1.86585		-0.0193293	0.00526146	-0.304368	-0.141527
	0.426725	0.595308	1.19079	1.86806		-0.038457	-0.0163309	-0.303321	-0.128965
	0.438519	0.599634	1.19941	1.86404		-0.0582526	-0.0698775	-0.301187	-0.142292
	0.46621	0.636413	1.24178	1.87631		-0.0524223	-0.113149	-0.28796	-0.167829
	0.491426	0.677328	1.30319	1.91233		-0.0402664	-0.120378	-0.264455	-0.17419
	0.494513	0.708185	1.35432	1.9531		-0.0395645	-0.0884783	-0.251897	-0.150052
	0.478572	0.731718	1.38317	1.97622		-0.0314115	-0.0405108	-0.259716	-0.121143
	0.461489	0.7579	1.39609	1.98982		-0.0153402	-0.0253303	-0.278757	-0.113491
	0.45741	0.796094	1.39879	2.01743		-0.0220387	-0.0524089	-0.293494	-0.118135
	0.473791	0.833839	1.39294	2.06192		-0.0579368	-0.066273	-0.285495	-0.116981
	0.503126	0.84305	1.3811	2.10862		-0.0994253	-0.0365125	-0.24665	-0.1061
	0.5251	0.821303	1.36726	2.14421		-0.12968	-0.0108231	-0.200667	-0.0856873
	0.529761	0.79437	1.36177	2.17266		-0.128637	-0.0336128	-0.181301	-0.0675133
	0.533935	0.777697	1.38615	2.20866		-0.0858936	-0.0986652	-0.191337	-0.0719594
	0.558395	0.775881	1.43743	2.26161		-0.0320408	-0.174206	-0.206639	-0.0948918
	0.59038	0.795695	1.48902	2.31676		-0.00430104	-0.212825	-0.213382	-0.108753
	0.608895	0.820872	1.52633	2.34989		0.0016897	-0.181843	-0.221986	-0.110699
	0.617244	0.827481	1.55229	2.35378		0.00728119	-0.114742	-0.235594	-0.118528
	0.624144	0.827556	1.55956	2.34786		0.0107917	-0.0690529	-0.248083	-0.130923
	0.63021	0.843575	1.54396	2.36392		0.00388018	-0.0455122	-0.253323	-0.134903
	0.636412	0.861716	1.52214	2.40828		-0.0169473	-0.0122132	-0.247807	-0.126272
	0.638139	0.863754	1.512	2.4549		-0.0474749	0.0303776	-0.236297	-0.101076
	0.626492	0.861291	1.52189	2.47032		-0.0696931	0.0616327	-0.236951	-0.0667346
	0.614239	0.865782	1.55581	2.45989		-0.0618473	0.069062	-0.251998	-0.0587414
	0.62228	0.874046	1.5998	2.45578		-0.0280625	0.0495371	-0.25449	-0.0946004
	0.646148	0.884706	1.62359	2.47523		0.000619504	0.0101084	-0.219537	-0.13727
	0.661782	0.88795	1.61804	2.50586		0.00282677	-0.020673	-0.163077	-0.144086
	0.660632	0.866135	1.60143	2.52261		-0.0227667	-0.0347867	-0.124535	-0.117905
	0.650399	0.835878	1.59289	2.51268		-0.0591926	-0.0635669	-0.133361	-0.0858923
	0.64252	0.837007	1.60919	2.49602		-0.0870661	-0.121732	-0.182414	-0.0688373
	0.652399	0.864143	1.6575	2.50782		-0.0967265	-0.172946	-0.235684	-0.0822333
	0.682481	0.881891	1.71099	2.55356		-0.0887723	-0.168553	-0.25417	-0.114295
	0.70996	0.881321	1.73029	2.60314		-0.0710698	-0.103445	-0.235892	-0.132664
	0.712339	0.875055	1.7136	2.63733		-0.0485583	-0.0200759	-0.217438	-0.132363
	0.695516	0.872588	1.69456	2.65397		-0.0241291	0.023327	-0.218156	-0.142858
	0.677291	0.8852	1.69798	2.66113		-0.00665836	0.0106199	-0.215571	-0.171343
	0.666168	0.908498	1.72855	2.67259		-0.00221906	-0.0106512	-0.189338	-0.192788
	0.666812	0.906838	1.77497	2.68688		-0.00551563	0.00845634	-0.147161	-0.192887
	0.671983	0.869115	1.81955	2.67422		-0.0103292	0.0515343	-0.114281	-0.17178
	0.667002	0.833186	1.84967	2.62676		-0.0183251	0.0587535	-0.124149	-0.134965
	0.663598	0.834431	1.8712	2.58152		-0.0264777	0.00513439	-0.188819	-0.101225
	0.684539	0.868156	1.88922	2.58159		-0.0264173	-0.069811	-0.261884	-0.0862533
	0.720716	0.904454	1.90298	2.63104		-0.025961	-0.110615	-0.283371	-0.0765772
	0.743326	0.911666	1.90976	2.70033		-0.0335529	-0.0991882	-0.256702	-0.0620683
	0.737559	0.887216	1.90917	2.74877		-0.0348374	-0.0634316	-0.228596	-0.0584029
	0.703351	0.865628	1.90155	2.75004		-0.0228811	-0.046158	-0.230733	-0.0765686
	0.659958	0.874328	1.89892	2.71858		-0.014232	-0.0650583	-0.257781	-0.104326
	0.645772	0.897869	1.91175	2.69141		-0.0117591	-0.0855863	-0.287415	-0.127524
	0.676839	0.904967	1.92752	2.68981		-0.00318618	-0.0659421	-0.294578	-0.141132
	0.722057	0.890258	1.92363	2.70454		0.000955349	-0.0159802	-0.287814	-0.142557
	0.749644	0.877051	1.89563	2.72781		-0.00932387	0.0213524	-0.292504	-0.137873
	0.760615	0.890077	1.86537	2.75882		-0.00973785	0.0216091	-0.30562	-0.140109
	0.768702	0.929178	1.86358	2.80242		0.00911157	-0.00923559	-0.293221	-0.150369
	0.780761	0.965723	1.90167	2.85421		0.0212294	-0.0429741	-0.249046	-0.153942
	0.798424	0.974177	1.95454	2.89179		0.0222907	-0.0487904	-0.211424	-0.143291
	0.811486	0.962131	1.98345	2.89176		0.0256019	-0.0317644	-0.213568	-0.133385
	0.803512	0.960153	1.97345	2.86332		0.00931134	-0.0303258	-0.256089	-0.141611
	0.781731	0.983553	1.94061	2.84152		-0.0357283	-0.0487439	-0.310152	-0.165672
	0.775279	1.01389	1.91913	2.84491		-0.0726468	-0.0514449	-0.326752	-0.185716
	0.789271	1.02274	1.93502	2.8617		-0.0811807	-0.0246115	-0.290105	-0.172787
	0.801789	1.00246	1.98636	2.86723		-0.0753204	0.00995395	-0.246726	-0.115055
	0.805448	0.970927	2.05309	2.84451		-0.0525628	0.0307132	-0.242491	-0.046066
	0.805323	0.949705	2.11759	2.81324		-0.00574181	0.0286084	-0.258359	-0.0147842
	0.800479	0.942622	2.16717	2.80954		0.034146	0.00378423	-0.251836	-0.027238
	0.793281	0.935867	2.18583	2.84484		0.0453541	-0.0137387	-0.211874	-0.0518766
	0.790236	0.913989	2.17272	2.89166		0.0393545	0.00186065	-0.156066	-0.0693938
	0.78798	0.885009	2.14252	2.91926		0.013958	0.0211167	-0.119896	-0.0829063
	0.776917	0.880143	2.11858	2.92173		-0.0349705	0.00653279	-0.124771	-0.0973525
	0.767478	0.905	2.11893	2.91746		-0.0791555	-0.0287087	-0.152264	-0.118777
	0.777001	0.928187	2.14527	2.92715		-0.0909987	-0.0610404	-0.164461	-0.139912
	0.801379	0.932681	2.17539	2.94589		-0.0809005	-0.0849955	-0.154581	-0.133907
	0.822289	0.934469	2.18768	2.95926		-0.0608539	-0.0883931	-0.142715	-0.0966084
	0.831313	0.946619	2.19028	2.96334		-0.029629	-0.073072	-0.141451	-0.062563
	0.832003	0.970526	2.20397	2.96761		-0.000392789	-0.0729001	-0.140729	-0.0544407
	0.826645	0.998874	2.22904	2.97514		0.00937444	-0.0870563	-0.128341	-0.0610693
	0.824298	1.00045	2.24833	2.98207		0.00505979	-0.0749027	-0.107921	-0.0705853
	0.833474	0.955901	2.24118	2.98049		0.00140175	-0.0367924	-0.103386	-0.074805
	0.84555	0.906025	2.19869	2.96459		-0.0022028	-0.01968	-0.141316	-0.0624773
	0.850359	0.901834	2.14375	2.9426		-0.00793301	-0.0401625	-0.215121	-0.0466059
	0.857459	0.935619	2.11802	2.93321		-0.0163419	-0.0746415	-0.269941	-0.0527818
	0.870734	0.968102	2.13062	2.94713		-0.0246488	-0.0905957	-0.263942	-0.0689132
	0.875678	0.978677	2.15829	2.97408		-0.0263124	-0.0636823	-0.213659	-0.0634121
	0.865487	0.96192	2.18725	2.99324		-0.0136698	-0.00793067	-0.166714	-0.0453072
	0.847795	0.937421	2.2182	3.00303		0.0148972	0.0223929	-0.148323	-0.0424648
	0.830584	0.942666	2.24965	3.02341		0.0462483	-0.00177488	-0.150664	-0.0603073
	0.822993	0.979426	2.28056	3.08172		0.0658011	-0.0344738	-0.153087	-0.0953582
	0.834949	1.00439	2.30758	3.16904		0.0633806	-0.0223288	-0.150307	-0.14409
	0.859757	1.00123	2.31432	3.23195		0.0367349	0.0240924	-0.157986	-0.184958
	0.875788	0.998609	2.29907	3.22706		-0.00375718	0.0608287	-0.185933	-0.197929
	0.878637	1.00755	2.27967	3.17664		-0.0386004	0.0583584	-0.214615	-0.19267
	0.880312	1.01636	2.26939	3.13168		-0.0509914	0.0153082	-0.211088	-0.174453
	0.886147	1.01799	2.26607	3.12128		-0.0425945	-0.0384513	-0.169488	-0.13118
	0.892986	1.00861	2.27539	3.14091		-0.0239052	-0.0651971	-0.129284	-0.0700279
	0.891559	0.992464	2.30171	3.15948		-0.00471045	-0.065475	-0.128491	-0.0256138
	0.869015	0.994551	2.33944	3.14876		0.000450873	-0.074902	-0.162285	-0.0205055
	0.82971	1.02464	2.38256	3.11895		-0.0147049	-0.105523	-0.205203	-0.051521
	0.807918	1.04866	2.43053	3.0992		-0.031861	-0.132064	-0.227887	-0.0970058
	0.825664	1.03596	2.46923	3.09206		-0.033281	-0.122983	-0.212901	-0.119736
	0.865449	0.999448	2.47376	3.0841		-0.0212652	-0.0775821	-0.176932	-0.101912
	0.901795	0.972026	2.43415	3.06983		0.00361203	-0.0316737	-0.161871	-0.076231
	0.92016	0.976064	2.36501	3.05758		0.0402688	-0.0273532	-0.169633	-0.0866641
	0.915179	1.00436	2.29895	3.06298		0.0645162	-0.0657646	-0.172473	-0.126144
	0.904844	1.01952	2.27113	3.09367		0.0553896	-0.0970363	-0.156634	-0.150041
	0.908488	0.998067	2.29316	3.1264		0.0290239	-0.0739936	-0.131353	-0.12898
	0.914657	0.968373	2.34496	3.13062		2.51355e-05	-0.011423	-0.114753	-0.0695354
	0.906758	0.973436	2.40115	3.11049		-0.0349999	0.0353375	-0.121656	-0.0125363
	0.90133	1.01426	2.44911	3.10955		-0.060095	0.0404704	-0.13997	-0.00119619
	0.922305	1.05178	2.48225	3.15471		-0.0590698	0.0261885	-0.139731	-0.0362916
	0.965051	1.05243	2.49399	3.2197		-0.0548425	0.0203291	-0.126478	-0.0719789
	1.0084	1.0216	2.48038	3.24969		-0.0596621	0.0315799	-0.144981	-0.0727776
	1.03173	0.996184	2.44435	3.21889		-0.0482672	0.040971	-0.211388	-0.0541387
	1.01849	1.00435	2.40048	3.15974		-0.0212708	0.0149545	-0.288055	-0.0497509
	0.973977	1.03287	2.36835	3.13771		-0.00894362	-0.0443552	-0.32829	-0.063752
	0.934059	1.04258	2.36011	3.17542		-0.0058062	-0.0863114	-0.320311	-0.0709886
	0.927584	1.01439	2.36845	3.2324		0.00957636	-0.0796918	-0.279517	-0.051194
	0.946584	0.971891	2.3711	3.25752		0.0217923	-0.0533699	-0.238817	-0.0131135
	0.968494	0.957951	2.35314	3.24452		0.0255859	-0.042701	-0.224712	0.00494844
	0.983319	0.987403	2.33201	3.22076		0.0458429	-0.0506573	-0.217486	-0.0304042
	0.991428	1.03251	2.32866	3.21817		0.0747991	-0.0629308	-0.184289	-0.100885
	0.998989	1.05224	2.3377	3.23751		0.0862844	-0.0594386	-0.130771	-0.143813
	1.01668	1.02795	2.33811	3.24182		0.084061	-0.0308761	-0.0917142	-0.127743
	1.03235	0.981081	2.32385	3.2095		0.0770757	-0.00771469	-0.0830597	-0.083539
	1.0169	0.953091	2.30562	3.16324		0.0505972	-0.0286245	-0.100174	-0.0528625
	0.973296	0.961902	2.29812	3.14779		0.0134919	-0.0757585	-0.114443	-0.048222
	0.943579	0.981909	2.31099	3.18376		-0.000888113	-0.0965567	-0.0946371	-0.0553981
	0.958569	0.98374	2.34166	3.2499		0.00535246	-0.0836314	-0.0542385	-0.0487442
	1.0012	0.972235	2.37855	3.30151		0.0126754	-0.0621594	-0.0460028	-0.0224013
	1.03985	0.964901	2.41158	3.31521		0.0198138	-0.0476831	-0.0864706	-0.00824799
	1.0637	0.967469	2.42764	3.30603		0.031046	-0.0486367	-0.133677	-0.0323462
	1.07892	0.982181	2.41681	3.29463		0.0386281	-0.0571796	-0.142475	-0.0700991
	1.09652	0.999257	2.39092	3.28675		0.0467144	-0.0340208	-0.115151	-0.0902704
	1.12052	1.00213	2.38132	3.27563		0.06522	0.0277203	-0.0899766	-0.0980495
	1.13144	1.00034	2.40373	3.25985		0.0874914	0.0723661	-0.101503	-0.107077
	1.10464	1.01952	2.44334	3.25409		0.0980053	0.0716952	-0.14509	-0.118426
	1.05281	1.04554	2.47452	3.27117		0.0907568	0.0576639	-0.183091	-0.136236
	1.01768	1.0424	2.47776	3.30596		0.0719522	0.0575743	-0.179016	-0.151016
	1.02057	1.01543	2.44776	3.33163		0.0511842	0.0689984	-0.146134	-0.140497
	1.05399	0.999735	2.40675	3.33548		0.0423129	0.0807874	-0.129254	-0.119799
	1.09967	1.01143	2.39031	3.32928		0.0484377	0.0677753	-0.148091	-0.131535
	1.13411	1.04759	2.40651	3.33645		0.0547577	0.0146116	-0.18543	-0.172812
	1.14413	1.09203	2.44016	3.36075		0.0451217	-0.0416979	-0.217998	-0.200974
	1.14529	1.10757	2.4731	3.38108		0.0156985	-0.0555099	-0.232346	-0.199006
	1.15132	1.08013	2.49093	3.37269		-0.0172922	-0.0389771	-0.234905	-0.171845
	1.14836	1.04594	2.48787	3.33728		-0.0372039	-0.0373136	-0.247857	-0.132554
	1.12071	1.03477	2.48409	3.3156		-0.0374205	-0.0630528	-0.273067	-0.11256
	1.07874	1.03133	2.4985	3.34447		-0.0228803	-0.0898865	-0.278207	-0.128646
	1.0487	1.01678	2.52101	3.40638		-0.00899792	-0.0894337	-0.239922	-0.14805
	1.04703	0.997148	2.53158	3.45092		-0.00511769	-0.0481483	-0.18275	-0.136723
	1.0764	0.985482	2.528	3.44448		-0.00535262	0.0128714	-0.14938	-0.112538
	1.11783	1.0014	2.51907	3.38956		-0.00323849	0.0503253	-0.154922	-0.109674
	1.14288	1.05158	2.51719	3.32777		-0.00832417	0.0504779	-0.174978	-0.135461
	1.14786	1.09571	2.53216	3.30595		-0.0241853	0.0472291	-0.185997	-0.179705
	1.14921	1.08969	2.56067	3.32186		-0.0393244	0.0673001	-0.18447	-0.221082
	1.15026	1.04674	2.58284	3.33277		-0.0481795	0.0933824	-0.188774	-0.231519
	1.14529	1.01945	2.58609	3.32339		-0.050504	0.0921498	-0.215238	-0.210086
	1.13448	1.03368	2.57428	3.31604		-0.0367085	0.0486314	-0.248419	-0.186834
	1.11706	1.07352	2.55843	3.33193		-0.0130851	-0.0188805	-0.247181	-0.172165
	1.09574	1.10264	2.54574	3.36463		-0.000760776	-0.0697836	-0.204436	-0.149168
	1.08832	1.09634	2.53715	3.38133		0.00784887	-0.0789502	-0.155392	-0.113645
	1.09788	1.06712	2.52154	3.35269		0.0297314	-0.0620764	-0.129627	-0.0814095
	1.09949	1.04889	2.48937	3.29949		0.0488166	-0.0570923	-0.131442	-0.0632187
	1.08242	1.05186	2.45655	3.27418		0.049566	-0.0732326	-0.150945	-0.0668754
	1.06191	1.05613	2.44915	3.30146		0.0467556	-0.0819917	-0.165139	-0.0956031
	1.04951	1.04811	2.47444	3.35234		0.0441304	-0.0631867	-0.166919	-0.127125
	1.05012	1.03863	2.51526	3.38297		0.0313022	-0.0348394	-0.173866	-0.139057
	1.0677	1.04986	2.55197	3.36936		0.0292043	-0.0258528	-0.192838	-0.137756
	1.0928	1.08846	2.57196	3.33124		0.0528136	-0.0468527	-0.194769	-0.140386
	1.10889	1.13143	2.57841	3.30782		0.0703576	-0.0838151	-0.159133	-0.145532
	1.12024	1.14393	2.57832	3.31834		0.0673957	-0.0920358	-0.110897	-0.141572
	1.14255	1.11393	2.57646	3.33591		0.0693156	-0.048158	-0.0899043	-0.125034
	1.16769	1.07009	2.57272	3.32552		0.0749362	0.00568452	-0.114121	-0.101332
	1.17212	1.05076	2.56388	3.29052		0.0667807	0.017239	-0.163942	-0.0785494
	1.15146	1.06269	2.54935	3.26436		0.0579464	-0.00901956	-0.198854	-0.0677529
	1.11734	1.07958	2.54105	3.27337		0.0587284	-0.0344757	-0.182591	-0.0703573
	1.08383	1.07468	2.54695	3.30805		0.0483709	-0.0303992	-0.131857	-0.0717425
	1.06855	1.04859	2.5547	3.33314		0.0363747	0.00958166	-0.101986	-0.0665056
	1.07941	1.0239	2.5507	3.32575		0.0576411	0.0580365	-0.117616	-0.0742243
	1.09958	1.02272	2.53634	3.30973		0.0956262	0.0682443	-0.154684	-0.109148
	1.10829	1.04247	2.5228	3.32336		0.11305	0.0414051	-0.183906	-0.157503
	1.1119	1.05289	2.52455	3.3615		0.108507	0.025164	-0.188712	-0.199513
	1.12084	1.03529	2.5399	3.38589		0.0911822	0.0376981	-0.173378	-0.219523
	1.1235	1.01628	2.55128	3.37014		0.0542939	0.0466239	-0.164426	-0.202914
	1.10476	1.02916	2.55229	3.32657		0.0101187	0.0298727	-0.176519	-0.16255
	1.06765	1.06571	2.56181	3.29598		-0.0183486	-0.00497903	-0.181088	-0.132531
	1.02941	1.08987	2.58942	3.30552		-0.0354719	-0.0425947	-0.153305	-0.125128
	1.00737	1.08222	2.62692	3.34235		-0.0471291	-0.0524411	-0.109904	-0.127696
	1.01223	1.04689	2.66956	3.36698		-0.0401938	-0.0151755	-0.088481	-0.130759
	1.04016	1.01192	2.71137	3.36082		-0.0122032	0.0336289	-0.104678	-0.128657
	1.06516	1.01561	2.73562	3.3358		0.0170277	0.0522636	-0.14692	-0.110412
	1.07231	1.05414	2.73463	3.32327		0.0352009	0.061446	-0.186938	-0.0819312
	1.077	1.07997	2.72354	3.33544		0.0420637	0.0918211	-0.201063	-0.0633371
	1.09391	1.07644	2.7149	3.35575		0.0396142	0.122221	-0.190141	-0.0556878
	1.1134	1.07277	2.70992	3.3618		0.0354	0.117616	-0.175421	-0.050563
	1.12327	1.08722	2.70411	3.35471		0.0324086	0.0646858	-0.164199	-0.0567417
	1.12056	1.11645	2.69274	3.35338		0.0252769	-0.0230289	-0.141131	-0.0701406
	1.10511	1.15377	2.67652	3.36847		0.00577479	-0.0922877	-0.106899	-0.0631228
	1.09051	1.17778	2.67511	3.39332		-0.0182017	-0.0902828	-0.0899832	-0.0309588
	1.09862	1.17004	2.69793	3.41054		-0.0307456	-0.0360782	-0.108412	-0.00170039
	1.12815	1.15241	2.72282	3.41551		-0.0251083	-0.00388509	-0.150459	0.011957
	1.15433	1.15184	2.72821	3.42965		-0.00406722	-0.0250952	-0.189351	0.0133099
	1.16527	1.14938	2.7224	3.47556		0.0223924	-0.0672068	-0.192346	-0.00388663
	1.16361	1.12228	2.71549	3.5383		0.0445538	-0.086002	-0.156369	-0.0312922
	1.15341	1.08607	2.70627	3.57009		0.0522036	-0.068641	-0.118206	-0.0484623
	1.14178	1.06362	2.69197	3.54306		0.0467102	-0.0338733	-0.11397	-0.0617567
	1.13275	1.06475	2.66988	3.47501		0.0424852	-0.0121575	-0.13242	-0.0824915
	1.11936	1.08887	2.63628	3.41386		0.0504761	-0.0179361	-0.143056	-0.0963025
	1.10126	1.11541	2.6106	3.40289		0.0688642	-0.0275048	-0.136258	-0.0916164
	1.10063	1.11073	2.61709	3.43879		0.086325	-0.0110528	-0.125125	-0.0839675
	1.13265	1.07875	2.65036	3.47554		0.0857922	0.0176903	-0.119922	-0.0839272
	1.17762	1.05388	2.68267	3.4845		0.0592021	0.0249086	-0.125299	-0.0837652
	1.21255	1.04855	2.69391	3.48264		0.0250458	0.0103911	-0.134418	-0.0801182
	1.22842	1.04912	2.68177	3.4851		0.00337047	0.00717575	-0.130152	-0.0727165
	1.22463	1.04398	2.66066	3.48672		-0.0114511	0.0361041	-0.10674	-0.0562262
	1.21579	1.03379	2.65239	3.48052		-0.0239075	0.084841	-0.0888275	-0.0351926
	1.21767	1.03006	2.65585	3.46626		-0.0140846	0.110587	-0.0917941	-0.0301066
	1.21798	1.04692	2.65025	3.44526		0.0212315	0.0775854	-0.104241	-0.0436346
	1.19871	1.0786	2.62987	3.43174		0.0538772	0.00124843	-0.112347	-0.0553504
	1.17421	1.10014	2.61693	3.43044		0.0717286	-0.0611069	-0.110762	-0.0548037
	1.16781	1.09897	2.63264	3.42771		0.0761454	-0.0736006	-0.0960429	-0.0492319
	1.17981	1.08875	2.68041	3.41336		0.060667	-0.0583372	-0.0819568	-0.0431486
	1.20233	1.08959	2.74302	3.39759		0.036664	-0.0501745	-0.0848837	-0.044486
	1.21849	1.10612	2.79553	3.39153		0.0287883	-0.0557438	-0.0887597	-0.0619448
	1.20347	1.12549	2.82618	3.40338		0.0245511	-0.063532	-0.077231	-0.0845956
	1.16494	1.12478	2.84134	3.43395		0.0025907	-0.0600023	-0.0610023	-0.0963032
	1.14303	1.09707	2.84591	3.45919		-0.0136729	-0.0366923	-0.059529	-0.101538
	1.15138	1.06652	2.83681	3.45004		-0.00313968	-0.0141108	-0.0687577	-0.109452
	1.16319	1.06261	2.81387	3.41169		0.0077542	-0.0239336	-0.0757504	-0.116801
	1.159	1.08978	2.78383	3.38204		0.00533944	-0.0509732	-0.0739232	-0.116377
	1.14734	1.12492	2.75731	3.3867		0.00445092	-0.0509914	-0.0645037	-0.107547
	1.14149	1.14636	2.74685	3.41814		-0.00641271	-0.0204045	-0.0586577	-0.0910906
	1.14615	1.1555	2.75062	3.45316		-0.0334744	0.0129201	-0.0725181	-0.0677125
	1.16073	1.16608	2.75972	3.46982		-0.04208	0.023226	-0.100725	-0.0475531
	1.16999	1.17861	2.7712	3.47216		-0.0122291	-0.00480217	-0.120191	-0.046424
	1.16135	1.1761	2.78816	3.48075		0.0260932	-0.0536322	-0.121102	-0.068395
	1.15067	1.14038	2.80493	3.49654		0.0543055	-0.0703076	-0.120056	-0.109177
	1.15981	1.07694	2.815	3.50106		0.0793603	-0.0368893	-0.121738	-0.162967
	1.18137	1.02769	2.80659	3.48769		0.0859348	0.000789686	-0.11745	-0.211119
	1.19202	1.04111	2.76942	3.4729		0.0637617	0.00941661	-0.100014	-0.229645
	1.18621	1.10543	2.71787	3.46911		0.0347704	0.00441349	-0.0695124	-0.217673
	1.1744	1.15594	2.68453	3.48345		0.0112529	0.00554813	-0.0351324	-0.189285
	1.16445	1.15114	2.68895	3.50482		-0.0150997	0.0181961	-0.021195	-0.147268
	1.16463	1.10055	2.72705	3.51241		-0.0346938	0.0469238	-0.0386596	-0.0989891
	1.17245	1.04172	2.78376	3.50052		-0.0280699	0.0746062	-0.0675377	-0.0587405
	1.1697	1.01724	2.83528	3.48492		-0.00406713	0.0685844	-0.0869506	-0.0241992
	1.14525	1.03609	2.87062	3.47553		0.0196981	0.0430468	-0.0946998	0.0102472
	1.11873	1.05572	2.90034	3.46771		0.0350333	0.0385459	-0.0933578	0.031225
	1.12079	1.04336	2.92635	3.45186		0.0344728	0.04804	-0.0829646	0.0294896
	1.14827	1.02274	2.92628	3.42097		0.0142743	0.038985	-0.0665172	0.011811
	1.17317	1.01939	2.88905	3.38551		-0.00649674	0.0104076	-0.0505728	-0.0196724
	1.17883	1.02431	2.83288	3.36512		-0.00938237	-0.0190825	-0.0404934	-0.0591282
	1.16762	1.02902	2.78886	3.36148		-0.000365498	-0.0326598	-0.0431879	-0.0786481
	1.15498	1.03494	2.78286	3.36099		0.00925578	-0.00688332	-0.0656285	-0.0628793
	1.16036	1.0338	2.82192	3.35232		0.0199205	0.0490744	-0.0945409	-0.0363763
	1.17974	1.03099	2.87473	3.34155		0.0426217	0.0870463	-0.1056	-0.0214403
	1.18568	1.04506	2.90404	3.34551		0.0752572	0.0898558	-0.0913725	-0.00783467
	1.16885	1.05966	2.91122	3.3807		0.100218	0.0882237	-0.0724404	0.0109903
	1.15101	1.04297	2.92574	3.43543		0.096627	0.0971097	-0.0617449	0.0288245
	1.15139	1.01192	2.95302	3.47166		0.0587821	0.0907552	-0.058238	0.0476012
	1.16802	1.01368	2.97596	3.46703		0.00974553	0.0499737	-0.0570992	0.0633679
	1.18932	1.05386	2.97749	3.43072		-0.019311	-0.0115591	-0.0508614	0.0577745
	1.19764	1.10388	2.9537	3.38589		-0.0180656	-0.0615284	-0.032301	0.0406764
	1.17794	1.13445	2.9274	3.34968		-0.00302385	-0.0682285	-0.0126972	0.0385812
	1.14336	1.12669	2.93224	3.33588		0.00828168	-0.0293792	-0.00302936	0.0408152
	1.12074	1.09712	2.96295	3.34192		0.0132222	0.0140612	0.00138474	0.0276862
	1.11943	1.09155	2.97436	3.35196		0.0151746	0.013052	0.0098267	0.0111181
	1.12992	1.12229	2.9432	3.36326		0.0205284	-0.030921	0.0109117	0.00660928
	1.14252	1.14864	2.88907	3.3852		0.0319697	-0.075689	-0.00783721	0.0133995
	1.14911	1.13737	2.8443	3.40422		0.0315925	-0.0894591	-0.044746	0.034782
	1.14655	1.09718	2.83005	3.39926		0.00117792	-0.0714011	-0.0881274	0.0659524
	1.14707	1.05567	2.84681	3.36711		-0.0377456	-0.0431813	-0.121161	0.0840332
	1.15396	1.04298	2.86791	3.31926		-0.0521954	-0.0271613	-0.124484	0.076259
	1.15127	1.06721	2.87095	3.27588		-0.0408758	-0.0251506	-0.104037	0.0577342
	1.14057	1.09779	2.8648	3.25554		-0.0190401	-0.0143777	-0.0971328	0.0426137
	1.13929	1.09918	2.86863	3.25061		0.00387553	0.0151163	-0.118239	0.0270685
	1.14901	1.078	2.88306	3.24597		0.0103656	0.0379525	-0.147132	0.00700183
	1.16337	1.07189	2.89335	3.25111		-0.00626667	0.024438	-0.167525	-0.015355
	1.18081	1.09955	2.88139	3.2823		-0.016937	-0.0154206	-0.178416	-0.0409773
	1.19162	1.1375	2.84772	3.33026		-0.00848763	-0.0477242	-0.176015	-0.0675186
	1.18533	1.14311	2.82056	3.37024		-0.00561355	-0.0583296	-0.166959	-0.0865656
	1.1763	1.10387	2.82674	3.37671		-0.0098622	-0.0540975	-0.158425	-0.0999318
	1.18151	1.05263	2.84972	3.3428		0.000904394	-0.0470979	-0.134192	-0.116166
	1.19012	1.03423	2.85496	3.29789		0.0146056	-0.0541213	-0.0858461	-0.123453
	1.18647	1.05485	2.83095	3.28791		0.0111031	-0.0679709	-0.0400111	-0.104244
	1.17539	1.08053	2.80221	3.32153		0.00523194	-0.0558159	-0.0227956	-0.062629
	1.16616	1.08389	2.80127	3.3618		0.00498423	-0.0144124	-0.0364696	-0.0181653
	1.16375	1.07259	2.83764	3.36567		-0.00618579	0.0169952	-0.0666575	0.00992363
	1.17195	1.06881	2.88438	3.3227		-0.0147566	0.0153853	-0.098753	0.00934753
	1.18427	1.07839	2.9104	3.26373		0.00452613	-0.0128957	-0.117392	-0.0163929
	1.18081	1.08788	2.91432	3.23035		0.0297762	-0.05374	-0.129438	-0.0450388
	1.16113	1.08006	2.91574	3.24633		0.0366545	-0.0736885	-0.149414	-0.0565923
	1.15503	1.04582	2.92514	3.29154		0.0384647	-0.0529375	-0.169738	-0.053939
	1.17839	0.998421	2.93114	3.33291		0.0418688	-0.0307281	-0.16869	-0.0545406
	1.20892	0.966921	2.91547	3.35191		0.0358778	-0.0468428	-0.154102	-0.0588829
	1.22215	0.961516	2.87872	3.34866		0.0305542	-0.0764628	-0.155074	-0.0578032
	1.21232	0.960557	2.85464	3.33278		0.0417535	-0.0784079	-0.176014	-0.051696
	1.19028	0.945617	2.87384	3.3186		0.0493323	-0.0517992	-0.197243	-0.040858
	1.17643	0.92812	2.9223	3.3114		0.037202	-0.0139135	-0.202311	-0.0263108
	1.18642	0.929335	2.95727	3.30193		0.0196749	0.0184843	-0.183681	-0.0257002
	1.21153	0.954285	2.94978	3.28535		0.00629299	0.0245663	-0.151984	-0.0454097
	1.22151	0.994001	2.91028	3.26562		-0.00786191	0.0112022	-0.136461	-0.0619206
	1.20646	1.02509	2.88389	3.24731		-0.0197073	0.0133681	-0.146692	-0.066515
	1.188	1.03403	2.90332	3.23417		-0.0243341	0.0319509	-0.15856	-0.0719847
	1.18425	1.04145	2.94909	3.22552		-0.0281782	0.0262449	-0.157569	-0.0738671
	1.18858	1.06814	2.97588	3.22146		-0.0267953	-0.00773733	-0.158806	-0.0670889
	1.18842	1.09517	2.97152	3.22647		-0.0088588	-0.0328089	-0.175682	-0.0612976
	1.1785	1.09848	2.95305	3.24241		0.0205761	-0.0327313	-0.207446	-0.0514942
	1.15899	1.0882	2.93802	3.25538		0.0418106	-0.0149868	-0.236736	-0.0278826
	1.14527	1.0786	2.9264	3.25778		0.0495145	0.00695437	-0.24439	-0.0124439
	1.15664	1.07389	2.90857	3.25674		0.0544069	0.00650932	-0.224118	-0.0252364
	1.17998	1.08471	2.87728	3.26113		0.0609735	-0.0196106	-0.198317	-0.0459759
	1.18787	1.10531	2.85178	3.27109		0.0663296	-0.0215757	-0.193687	-0.0506352
	1.18363	1.09995	2.85842	3.27199		0.064435	0.0298024	-0.212573	-0.0463928
	1.18782	1.06689	2.89011	3.24834		0.058194	0.0920972	-0.233261	-0.0445973
	1.20512	1.05124	2.91185	3.20712		0.0530212	0.116512	-0.239146	-0.0413738
	1.22698	1.07305	2.90671	3.18421		0.0509577	0.0979987	-0.226157	-0.0416825
	1.2362	1.10588	2.88276	3.2029		0.0508625	0.0618403	-0.20031	-0.0405366
	1.21877	1.12283	2.85235	3.24636		0.0445231	0.0347282	-0.17464	-0.0175247
	1.18512	1.11405	2.83353	3.27427		0.0328234	0.0312437	-0.167258	0.0184989
	1.16843	1.0818	2.83921	3.26349		0.0280518	0.0388824	-0.170391	0.0254143
	1.18258	1.05416	2.85264	3.22656		0.0355882	0.0261877	-0.164416	-0.00442422
	1.20469	1.05867	2.84919	3.19998		0.0448521	-0.0118801	-0.151675	-0.0407652
	1.21041	1.0778	2.83238	3.2082		0.0483256	-0.0416087	-0.147658	-0.0650369
	1.19517	1.08531	2.82076	3.23607		0.043508	-0.0316431	-0.148241	-0.0673828
	1.17152	1.08727	2.82394	3.24675		0.0220703	0.00966268	-0.139247	-0.0448918
	1.16505	1.09864	2.83211	3.23473		-0.0100226	0.0532049	-0.125157	-0.0260205
	1.18682	1.11557	2.82187	3.223		-0.0294535	0.0719793	-0.120823	-0.0373957
	1.2127	1.12714	2.78242	3.22298		-0.0304087	0.0561862	-0.133721	-0.0617634
	1.21386	1.12384	2.74614	3.22551		-0.0211649	0.0273847	-0.160293	-0.0713257
	1.1987	1.10212	2.75299	3.21783		0.00257386	0.0156355	-0.18318	-0.0660493
	1.19161	1.08039	2.79669	3.19066		0.0352525	0.0195518	-0.183009	-0.059486
	1.19656	1.08346	2.83234	3.16197		0.0542162	0.0194681	-0.173391	-0.060467
	1.20996	1.10892	2.83724	3.1656		0.0600789	0.015781	-0.187432	-0.0652522
	1.22327	1.12912	2.8292	3.20411		0.0686672	0.0225935	-0.225256	-0.0600236
	1.22426	1.12326	2.84197	3.24475		0.0673933	0.0395734	-0.253692	-0.0278612
	1.21988	1.09221	2.88418	3.26159		0.0432115	0.0533164	-0.259159	0.02321
	1.22473	1.05755	2.92858	3.24646		0.0210832	0.0507348	-0.250171	0.0580862
	1.22629	1.04659	2.93546	3.20805		0.0146169	0.0278915	-0.243165	0.0592887
	1.20535	1.06359	2.90021	3.17051		0.00471012	-0.00576157	-0.25402	0.0487369
	1.17334	1.08265	2.85988	3.14736		-0.00629	-0.0201233	-0.284407	0.0567459
	1.15735	1.07825	2.84956	3.13717		-0.0055127	0.000623186	-0.299981	0.0845635
	1.16409	1.05843	2.86619	3.13703		-0.0121217	0.0278758	-0.285201	0.114782
	1.185	1.0503	2.87597	3.14868		-0.0281086	0.0306708	-0.262893	0.124277
	1.20502	1.06157	2.85648	3.16849		-0.021283	0.0140623	-0.25319	0.10162
	1.2026	1.07544	2.82557	3.19833		-0.00537961	-0.00598901	-0.246757	0.0660219
	1.17395	1.07169	2.81991	3.23451		-0.0245434	-0.0178261	-0.229394	0.0511099
	1.14933	1.04965	2.84706	3.25954		-0.0615442	-0.00924604	-0.19822	0.0602981
	1.15383	1.02952	2.87432	3.26208		-0.065897	0.00660286	-0.161331	0.0717585
	1.17449	1.03282	2.86924	3.2521		-0.0418466	0.000203392	-0.142283	0.0710933
	1.18383	1.05462	2.8366	3.24769		-0.012761	-0.0144544	-0.159852	0.0650394
	1.17632	1.06499	2.81393	3.24965		0.0156238	0.00134175	-0.193293	0.0646932
	1.16155	1.04701	2.82225	3.245		0.0280469	0.0424929	-0.20197	0.0703047
	1.14631	1.02111	2.83874	3.22626		0.015448	0.0776877	-0.179173	0.0735324
	1.13956	1.0178	2.83381	3.19668		0.00157231	0.0912827	-0.155439	0.0627731
	1.14209	1.04835	2.81386	3.16751		0.00590916	0.0780591	-0.156372	0.0368696
	1.14503	1.09736	2.81206	3.14567		0.0118235	0.0424776	-0.182244	0.0200642
	1.14756	1.12808	2.84576	3.13122		0.0103395	0.0178877	-0.210659	0.0309439
	1.16054	1.10745	2.90124	3.12347		0.0151349	0.0279063	-0.210244	0.0550697
	1.18863	1.04871	2.93663	3.13914		0.0309815	0.0489855	-0.182987	0.0741014
	1.21393	1.00858	2.92607	3.18557		0.0534978	0.0540415	-0.171358	0.0899739
	1.21826	1.01348	2.88919	3.24153		0.0792738	0.0517996	-0.202701	0.100396
	1.20153	1.03582	2.86574	3.27552		0.0953469	0.0525196	-0.248822	0.0992358
	1.17049	1.05127	2.86345	3.26785		0.0798384	0.0473832	-0.273604	0.0988284
	1.13845	1.06136	2.86591	3.23045		0.037378	0.0401083	-0.268188	0.0991913
	1.12701	1.07016	2.85826	3.19992		-0.000415146	0.0345196	-0.248286	0.0824917
	1.14159	1.08395	2.83799	3.20582		-0.00828377	0.0124813	-0.236716	0.0552011
	1.15668	1.10032	2.81975	3.23564		0.00999728	-0.0208451	-0.249554	0.0436609
	1.15249	1.09076	2.8252	3.25784		0.0337227	-0.0332727	-0.273409	0.0490202
	1.1352	1.04213	2.84725	3.25009		0.0492534	-0.0198872	-0.277379	0.0586623
	1.11554	0.995184	2.85348	3.21348		0.0528588	-0.00584948	-0.250531	0.0683097
	1.09971	0.990954	2.83388	3.17719		0.0528163	0.00286074	-0.221235	0.075409
	1.09866	1.02	2.8145	3.16633		0.0555297	0.00957307	-0.20964	0.0786828
	1.11031	1.054	2.82197	3.17281		0.0587469	0.00976346	-0.207346	0.0980818
	1.12154	1.07886	2.85736	3.17928		0.0555369	0.0108492	-0.195325	0.142651
	1.13378	1.08468	2.89275	3.1863		0.0464963	0.0202062	-0.169306	0.17349
	1.15105	1.07911	2.88524	3.20418		0.0447475	0.0297622	-0.147909	0.152109
	1.16147	1.0848	2.82513	3.23425		0.0539816	0.0296549	-0.160946	0.0998167
	1.15354	1.10231	2.75996	3.26777		0.0682983	0.027822	-0.211583	0.0640439
	1.13408	1.10229	2.74602	3.28166		0.0832638	0.0335297	-0.250257	0.0670675
	1.11817	1.0738	2.78391	3.25884		0.0938561	0.0380499	-0.233178	0.101017
	1.11532	1.04049	2.828	3.21308		0.0963916	0.029137	-0.182075	0.131953
	1.132	1.01908	2.83578	3.18354		0.0960326	0.00714463	-0.152936	0.126581
	1.15619	1.01077	2.80785	3.18856		0.0900355	-0.019545	-0.165917	0.104677
	1.16243	1.01043	2.77901	3.21608		0.0612644	-0.0380371	-0.194357	0.11435
	1.15016	1.00363	2.78319	3.24684		0.0196217	-0.0279289	-0.199043	0.154298
	1.13893	0.983583	2.81301	3.27288		0.00126412	0.0123036	-0.169237	0.176474
	1.13493	0.969789	2.83725	3.29596		0.0168384	0.049862	-0.138144	0.152851
	1.1319	0.980535	2.84627	3.31986		0.0492769	0.0635646	-0.154778	0.0967911
	1.12813	1.00649	2.86145	3.33373		0.0861425	0.0626374	-0.212643	0.0483575
	1.11848	1.03083	2.89577	3.31387		0.108156	0.0570889	-0.256274	0.0527924
	1.10539	1.0474	2.93288	3.26367		0.0993022	0.0418217	-0.252187	0.114584
	1.11498	1.05598	2.94653	3.2191		0.0848552	0.0142535	-0.231241	0.180492
	1.15766	1.06414	2.93139	3.20714		0.0914747	-0.0218622	-0.23166	0.191258
	1.19726	1.07928	2.91474	3.22555		0.0958913	-0.0585428	-0.259596	0.150559
	1.20044	1.09247	2.92495	3.25835		0.0765555	-0.0798198	-0.286147	0.10553
	1.16734	1.08674	2.95207	3.28211		0.0608421	-0.0766873	-0.27747	0.0791463
	1.11535	1.0643	2.95981	3.29099		0.0665314	-0.0642029	-0.237671	0.0552287
	1.0714	1.04416	2.92799	3.30203		0.0790377	-0.0654418	-0.21681	0.0186001
	1.06194	1.04366	2.87559	3.31752		0.0976719	-0.0812239	-0.247718	-0.0208887
	1.07766	1.06078	2.84751	3.31459		0.12337	-0.0971137	-0.296235	-0.0296769
	1.08457	1.07715	2.87083	3.28009		0.123289	-0.107844	-0.309127	0.0153263
	1.07991	1.07803	2.91743	3.22948		0.0903769	-0.103705	-0.280007	0.0880738
	1.09126	1.06594	2.9348	3.18953		0.0632132	-0.0759807	-0.238921	0.125975
	1.12184	1.05594	2.90574	3.17674		0.054524	-0.0441161	-0.215559	0.10509
	1.14896	1.05477	2.86215	3.1854		0.0479055	-0.0213061	-0.214312	0.0607636
	1.16383	1.048	2.84943	3.18669		0.048828	0.00786218	-0.215838	0.0343328
	1.16936	1.02483	2.88003	3.16768		0.065472	0.0383567	-0.200799	0.0287639
	1.16654	1.00113	2.91806	3.14187		0.0762845	0.0339732	-0.180608	0.0168237
	1.16335	0.999611	2.91683	3.13378		0.0808382	-0.00796898	-0.184471	-0.0311193
	1.16944	1.01532	2.87984	3.15002		0.101567	-0.0605272	-0.213136	-0.104715
	1.17623	1.0268	2.84337	3.17957		0.125058	-0.106634	-0.236689	-0.148245
	1.16603	1.0247	2.83339	3.2035		0.124066	-0.130188	-0.227708	-0.118191
	1.14405	1.0094	2.84816	3.2015		0.105282	-0.123752	-0.187233	-0.0464054
	1.13145	0.9916	2.87085	3.17638		0.0881446	-0.113095	-0.140153	-0.0104905
	1.1384	0.994679	2.87883	3.15099		0.06944	-0.119805	-0.128844	-0.0366848
	1.15945	1.02402	2.87001	3.14423		0.0478215	-0.120253	-0.166195	-0.0842612
	1.18001	1.05016	2.8656	3.15509		0.0339633	-0.0891482	-0.210524	-0.100878
	1.18501	1.05259	2.87044	3.17705		0.0302084	-0.0488729	-0.210253	-0.069688
	1.1685	1.0457	2.86272	3.19926		0.0338257	-0.0314343	-0.173142	-0.0217457
	1.14798	1.0399	2.8345	3.21253		0.0466317	-0.0382585	-0.147172	-0.017504
	1.14883	1.02943	2.80364	3.21725		0.0636221	-0.0527722	-0.157964	-0.0673919
	1.16843	1.02051	2.79339	3.21112		0.0643686	-0.0550686	-0.184447	-0.109981
	1.18401	1.0126	2.81546	3.19435		0.0428587	-0.0238481	-0.192163	-0.0955536
	1.18676	0.99162	2.8578	3.17926		0.0126239	0.0280625	-0.170149	-0.0469899
	1.17909	0.969593	2.88228	3.18227		-0.0105029	0.0514977	-0.151326	-0.0124863
	1.16471	0.969886	2.87329	3.20674		-0.0187124	0.0332619	-0.175075	-0.0171389
	1.1561	0.970985	2.86306	3.24009		-0.0128163	0.00366317	-0.236011	-0.0518676
	1.16225	0.944771	2.87923	3.25338		0.000843913	-0.0154007	-0.280617	-0.0684537
	1.16887	0.906082	2.90493	3.21972		0.0131718	-0.0207608	-0.268931	-0.0287979
	1.16048	0.877809	2.90889	3.16315		0.0270076	-0.0112779	-0.218776	0.030021
	1.14617	0.862887	2.8791	3.1314		0.0452082	-0.00317035	-0.174399	0.0394929
	1.14197	0.866977	2.82366	3.13976		0.0545994	-0.0207962	-0.161948	-0.00275489
	1.14913	0.890415	2.77427	3.16073		0.0390231	-0.0548051	-0.175884	-0.0316475
	1.16291	0.909946	2.75512	3.15978		0.0033339	-0.0734631	-0.186504	-0.00791386
	1.17234	0.920114	2.75544	3.12474		-0.0244616	-0.064075	-0.172722	0.0422075
	1.1668	0.943557	2.75445	3.08231		-0.0231287	-0.0419669	-0.158406	0.0634585
	1.15751	0.984092	2.76625	3.07022		0.00831077	-0.0269625	-0.180352	0.0233381
	1.16455	1.01656	2.81167	3.0881		0.0501281	-0.0269121	-0.227534	-0.0486869
	1.18522	1.02574	2.88093	3.10565		0.0715901	-0.0407666	-0.252712	-0.0797889
	1.1975	1.01652	2.9394	3.11325		0.0629438	-0.0555768	-0.241513	-0.0459894
	1.19564	0.993393	2.95527	3.12955		0.0511118	-0.0587112	-0.221729	-0.00806065
	1.18923	0.966896	2.91635	3.16408		0.0542108	-0.0553195	-0.230112	-0.017329
	1.18612	0.956031	2.85073	3.2089		0.0599494	-0.0592516	-0.268658	-0.0496948
	1.19268	0.965879	2.80619	3.24698		0.0606971	-0.065269	-0.295953	-0.0516844
	1.20158	0.989514	2.79866	3.25743		0.0596372	-0.0636697	-0.257272	-0.00676172
	1.1893	1.02006	2.8003	3.23219		0.0502138	-0.0628874	-0.163088	0.0560119
	1.15721	1.04452	2.78912	3.19448		0.0339175	-0.0657566	-0.0913084	0.0827944
	1.13517	1.04461	2.77832	3.17142		0.0291039	-0.0621073	-0.0989438	0.0522373
	1.1364	1.01776	2.79179	3.16706		0.0299253	-0.0517519	-0.158837	0.00569393
	1.14736	0.97525	2.83191	3.17385		0.0189596	-0.043328	-0.205898	-0.00187629
	1.15802	0.935137	2.87494	3.18305		0.0148454	-0.0389984	-0.208236	0.0230365
	1.16338	0.91651	2.89351	3.18246		0.0357771	-0.0422276	-0.18329	0.0269011
	1.16177	0.927142	2.88999	3.17802		0.0561248	-0.0583343	-0.177245	-0.0205061
	1.17028	0.952138	2.88966	3.18611		0.0571531	-0.0690363	-0.215231	-0.0856236
	1.20166	0.968932	2.90777	3.20268		0.0534093	-0.0511632	-0.254989	-0.110822
	1.22966	0.972491	2.93399	3.21117		0.0457941	-0.0162614	-0.245277	-0.0680424
	1.22102	0.974316	2.94298	3.21111		0.0256973	0.00770165	-0.200104	0.00885328
	1.18227	0.986276	2.91949	3.20176		0.0151024	0.0136295	-0.177368	0.0495239
	1.14477	1.01036	2.87648	3.18439		0.0312037	0.00457933	-0.201803	0.0202053
	1.12993	1.03751	2.84963	3.16728		0.0485433	-0.0236927	-0.247244	-0.0334937
	1.14379	1.05223	2.85797	3.15206		0.0566179	-0.0569784	-0.273033	-0.044076
	1.17618	1.03736	2.8885	3.12895		0.0767049	-0.0752227	-0.259372	-0.000891439
	1.19794	0.995702	2.90755	3.10615		0.100652	-0.0847132	-0.23898	0.0469472
	1.18983	0.953353	2.89573	3.10538		0.106344	-0.0870263	-0.254034	0.0475163
	1.17237	0.932618	2.86391	3.12462		0.10424	-0.0660041	-0.291975	0.00241996
	1.16903	0.936294	2.84099	3.14288		0.109319	-0.0328448	-0.294161	-0.0312877
	1.17132	0.952725	2.83742	3.13958		0.107908	-0.0156158	-0.240022	-0.000504797
	1.16547	0.965609	2.83703	3.11527		0.0985973	-0.00985394	-0.170805	0.0680939
	1.15558	0.963823	2.8263	3.09191		0.0919896	-0.00388616	-0.144362	0.09677
	1.1552	0.953015	2.811	3.09364		0.068514	-0.00864137	-0.178205	0.05745
	1.16973	0.946342	2.80448	3.12031		0.015058	-0.0153678	-0.238805	0.00851761
	1.19467	0.943027	2.82152	3.14705		-0.0355649	-0.00032243	-0.268457	0.0173709
	1.21107	0.939387	2.86115	3.16055		-0.0472277	0.0218713	-0.247204	0.0855693
	1.19729	0.954492	2.90181	3.1663		-0.0294761	0.0162597	-0.218779	0.1575
	1.16116	0.998421	2.92305	3.17275		-0.00702078	-0.0172528	-0.237611	0.174366
	1.13737	1.04464	2.92916	3.17927		0.0121276	-0.0557032	-0.293565	0.12472
	1.14379	1.06532	2.92869	3.17666		0.0235492	-0.0836667	-0.329055	0.0641373
	1.16218	1.06104	2.92207	3.15878		0.0207956	-0.0842877	-0.305735	0.0414721
	1.17062	1.03623	2.91278	3.13498		0.00576588	-0.0567925	-0.243126	0.030443
	1.17075	1.00448	2.90478	3.13045		-0.0130759	-0.032687	-0.193749	-0.0170492
	1.17122	0.998457	2.89865	3.15192		-0.0328948	-0.0327204	-0.190066	-0.0884584
	1.18141	1.02053	2.90448	3.18791		-0.0416188	-0.0319996	-0.209617	-0.134143
	1.20526	1.0275	2.9308	3.21748		-0.026488	-0.0116119	-0.204218	-0.114073
	1.22242	1.00071	2.95713	3.22519		0.00614777	0.00599657	-0.165522	-0.0280113
	1.20796	0.964577	2.96277	3.21692		0.0383245	0.00652855	-0.135721	0.0650222
	1.17641	0.937794	2.95623	3.22161		0.0565999	-0.00367959	-0.148058	0.0830565
	1.15967	0.931476	2.95767	3.25287		0.0582252	-0.0244552	-0.184796	0.0276297
	1.16018	0.954111	2.97213	3.28848		0.0425967	-0.0526109	-0.203966	-0.0150338
	1.15854	0.983623	3.00241	3.29967		0.0189205	-0.0740653	-0.190808	0.009616
	1.14208	0.987571	3.03731	3.27235		-0.00128667	-0.086101	-0.168579	0.0693281
	1.11389	0.972879	3.05094	3.21476		-0.0139163	-0.0957504	-0.173079	0.100726
	1.09228	0.965677	3.03628	3.16199		-0.0127855	-0.0919977	-0.221832	0.0754941
	1.1018	0.962202	3.01479	3.14374		0.00852979	-0.0634619	-0.277136	0.0205469
	1.13763	0.948593	3.00141	3.15013		0.0413923	-0.0210221	-0.279172	0.00558739
	1.16508	0.928162	3.00026	3.15376		0.0629403	0.0146212	-0.218804	0.0637808
	1.16599	0.905559	3.00937	3.14895		0.0633314	0.0346031	-0.161956	0.136312
	1.15466	0.887889	3.01214	3.14609		0.0493421	0.04048	-0.170397	0.144021
	1.15356	0.889816	2.98771	3.15257		0.0252808	0.0324785	-0.241086	0.0940852
	1.17318	0.914699	2.94936	3.16961		0.00126511	0.0169923	-0.310044	0.0500212
	1.20073	0.943346	2.93022	3.18847		-0.00133592	0.0033061	-0.31324	0.051506
	1.20427	0.962736	2.94423	3.19284		0.0167009	-0.0115192	-0.251585	0.0825777
	1.16835	0.975047	2.97489	3.17852		0.0380654	-0.0322997	-0.198294	0.0954958
	1.1256	0.977387	2.99758	3.15944		0.067253	-0.0478071	-0.211398	0.0596314
	1.11436	0.967525	2.99648	3.14655		0.105773	-0.0507095	-0.265977	0.0155892
	1.12968	0.955599	2.97553	3.14242		0.126171	-0.0536246	-0.299366	0.0292777
	1.14597	0.944522	2.95001	3.14653		0.117686	-0.0612309	-0.294398	0.0962067
	1.14768	0.92555	2.92708	3.15805		0.103679	-0.0678806	-0.274681	0.135258
	1.13109	0.899286	2.90713	3.17033		0.0918837	-0.0752704	-0.264818	0.0970502
	1.1133	0.876173	2.89257	3.17613		0.0762221	-0.0812636	-0.265579	0.0168813
	1.1185	0.86601	2.88904	3.15958		0.0742593	-0.0762241	-0.252995	-0.0304881
	1.14011	0.878236	2.89651	3.10638		0.0893712	-0.0619264	-0.205724	-0.0126956
	1.14813	0.91037	2.91256	3.03605		0.0932874	-0.0522715	-0.149408	0.0291734
	1.13581	0.940574	2.93092	2.99836		0.0862232	-0.04428	-0.141981	0.0255964
	1.1227	0.947656	2.94485	3.01973		0.0923408	-0.0291183	-0.19009	-0.039416
	1.1211	0.933556	2.9496	3.08105		0.0952946	-0.0176734	-0.24141	-0.100948
	1.13027	0.916662	2.94531	3.13734		0.0683611	-0.0219568	-0.245034	-0.0857055
	1.14547	0.91581	2.93424	3.14601		0.0296725	-0.0360405	-0.203154	-0.0023424
	1.15445	0.938334	2.92435	3.1139		0.00495451	-0.0556658	-0.161168	0.0653528
	1.14839	0.970455	2.92222	3.09272		-0.0101524	-0.08177	-0.16665	0.0556708
	1.14136	0.984521	2.92411	3.1151		-0.00995755	-0.0947209	-0.211914	-0.011888
	1.14938	0.961117	2.91693	3.161		0.0159289	-0.0797384	-0.235547	-0.0619917
	1.15592	0.910015	2.89627	3.19212		0.0400103	-0.0619831	-0.204575	-0.041932
	1.13079	0.861817	2.87354	3.19382		0.0426257	-0.0597942	-0.165059	0.0230339
	1.08323	0.836288	2.87027	3.17804		0.0443442	-0.0608063	-0.173903	0.0513555
	1.05106	0.837197	2.89045	3.16994		0.0571846	-0.0597737	-0.22465	0.00703195
	1.05502	0.865111	2.9126	3.1728		0.0638282	-0.054409	-0.261716	-0.0528349
	1.08762	0.906178	2.90991	3.16552		0.0621963	-0.0265426	-0.247986	-0.0524425
	1.12069	0.935759	2.88492	3.13642		0.0663236	0.0157327	-0.197993	0.0106058
	1.12575	0.946198	2.85987	3.09746		0.0665515	0.0356526	-0.17457	0.0799549
	1.10393	0.949838	2.8537	3.07333		0.0518771	0.0341327	-0.223613	0.101004
	1.08708	0.949315	2.87241	3.07504		0.0337693	0.0420222	-0.31442	0.0704074
	1.09778	0.94207	2.90237	3.09612		0.0297256	0.0613499	-0.367607	0.0393752
	1.1164	0.937472	2.92068	3.11248		0.0465559	0.070332	-0.350289	0.0642576
	1.11583	0.937143	2.92021	3.10981		0.0823854	0.059335	-0.297728	0.12512
	1.09759	0.929673	2.91109	3.09721		0.122023	0.0268334	-0.255719	0.151624
	1.0803	0.916788	2.89955	3.09462		0.137455	-0.0254595	-0.243336	0.11822
	1.07657	0.909011	2.89131	3.10326		0.115709	-0.0699642	-0.245971	0.0675626
	1.08952	0.89923	2.89621	3.10661		0.0725131	-0.0794862	-0.233894	0.0436649
	1.10596	0.883865	2.91428	3.09712		0.0333191	-0.0694512	-0.201445	0.06008
	1.09871	0.880418	2.93495	3.08203		0.00684402	-0.0733802	-0.180811	0.0944184
	1.06691	0.887316	2.95439	3.08455		-0.00459358	-0.0952779	-0.19621	0.0993419
	1.04545	0.881856	2.96268	3.11784		0.00173015	-0.119919	-0.224366	0.0645812
	1.05603	0.869243	2.94306	3.15758		0.0199232	-0.141195	-0.224521	0.0440079
	1.0827	0.872957	2.90024	3.1685		0.0413843	-0.154696	-0.192067	0.0723442
	1.10375	0.886238	2.87178	3.14838		0.0578961	-0.161284	-0.151012	0.101922
	1.10874	0.89101	2.88288	3.12445		0.0605325	-0.168789	-0.128125	0.0766401
	1.10211	0.885981	2.92064	3.11875		0.0404302	-0.170671	-0.129066	0.00676535
	1.10535	0.869952	2.94649	3.13217		0.00450029	-0.15251	-0.136058	-0.0484445
	1.12765	0.850525	2.93409	3.13921		-0.0265981	-0.119525	-0.121741	-0.0310779
	1.14436	0.850281	2.88697	3.11954		-0.0435746	-0.0912452	-0.0939812	0.0687098
	1.12632	0.871804	2.84386	3.09694		-0.0462462	-0.0706828	-0.0918447	0.174059
	1.08017	0.880294	2.83428	3.10746		-0.0352572	-0.0495193	-0.128504	0.193965
	1.04185	0.855952	2.84474	3.14179		-0.0172041	-0.0318418	-0.169766	0.135057
	1.04039	0.822049	2.84779	3.16015		-0.00262591	-0.0274938	-0.186137	0.0868932
	1.08015	0.810492	2.84375	3.14244		0.0106291	-0.036689	-0.179911	0.0976795
	1.12896	0.829462	2.84543	3.10132		0.0254813	-0.0542144	-0.174236	0.137478
	1.14507	0.859939	2.85532	3.07287		0.0252268	-0.0782141	-0.189219	0.149416
	1.12974	0.868812	2.87065	3.08154		0.00334924	-0.0964796	-0.219996	0.11164
	1.12293	0.843712	2.88011	3.11017		-0.01951	-0.0936884	-0.225539	0.0587391
	1.14249	0.815593	2.86973	3.11363		-0.0333074	-0.0771473	-0.180499	0.057951
	1.16224	0.821915	2.84194	3.07651		-0.0399067	-0.0609121	-0.12125	0.119206
	1.14816	0.854921	2.81772	3.03382		-0.0241664	-0.041833	-0.110284	0.174219
	1.09043	0.880878	2.8106	3.03103		0.01164	-0.0181242	-0.16127	0.163756
	1.02083	0.887227	2.8192	3.07337		0.0360355	-0.00274751	-0.23176	0.11087
	1.00307	0.887224	2.8291	3.1204		0.0449879	0.00436249	-0.271934	0.079488
	1.05633	0.897697	2.82916	3.1224		0.0592868	0.0102999	-0.255744	0.096155
	1.11766	0.922472	2.82876	3.07323		0.0643795	0.0106766	-0.208478	0.127257
	1.12745	0.942033	2.84994	3.02234		0.0378418	0.00636925	-0.18435	0.114813
	1.09739	0.936015	2.89436	3.01997		0.00312906	0.00551371	-0.204083	0.0414197
	1.07356	0.911403	2.93269	3.06706		-0.012332	-0.00116961	-0.227123	-0.0331379
	1.0813	0.891384	2.93208	3.1281		-0.0132968	-0.024969	-0.214118	-0.0264014
	1.1132	0.890667	2.89737	3.16959		0.00490148	-0.0481061	-0.173069	0.0607784
	1.13607	0.901807	2.8694	3.1819		0.0478852	-0.0485171	-0.137702	0.14004
	1.11995	0.90549	2.87941	3.18458		0.0781806	-0.0344997	-0.134564	0.141296
	1.08137	0.892233	2.90944	3.19809		0.0690416	-0.0238406	-0.164246	0.0898595
	1.07096	0.871245	2.92125	3.20405		0.0493529	-0.0276455	-0.188348	0.0608755
	1.09995	0.861482	2.90265	3.17914		0.0428827	-0.0581557	-0.17715	0.0952135
	1.1263	0.871744	2.88282	3.13108		0.0330559	-0.106877	-0.154165	0.154242
	1.11713	0.885181	2.89237	3.08417		0.0150152	-0.132058	-0.164924	0.161773
	1.08444	0.877108	2.92576	3.06233		0.00262399	-0.114594	-0.201608	0.0942677
	1.06071	0.852809	2.93953	3.07211		-0.00759451	-0.0885117	-0.218242	0.0224956
	1.06741	0.843851	2.90615	3.09768		-0.00372619	-0.0781358	-0.193036	0.0219345
	1.09869	0.857101	2.85242	3.11353		0.0386787	-0.0740332	-0.153344	0.0830025
	1.12194	0.872771	2.82662	3.11882		0.0961058	-0.0700225	-0.142891	0.130012
	1.10916	0.877024	2.84196	3.12681		0.113215	-0.061833	-0.181128	0.123968
	1.07849	0.864513	2.87167	3.14188		0.0788933	-0.0422506	-0.236994	0.0889727
	1.06688	0.844888	2.88711	3.15397		0.0294825	-0.0289877	-0.254616	0.0742605
	1.08056	0.846808	2.88253	3.1466		-0.00725368	-0.046214	-0.225638	0.102094
	1.09254	0.876582	2.88004	3.12106		-0.0211719	-0.0726893	-0.197681	0.139438
	1.079	0.892946	2.9061	3.10063		-0.0155042	-0.071762	-0.203191	0.127444
	1.04542	0.864248	2.94726	3.10781		-0.00517935	-0.0459792	-0.222691	0.0625661
	1.0144	0.818831	2.95705	3.13321		0.00212151	-0.0183532	-0.224703	0.00114236
	1.01192	0.800724	2.91788	3.1447		0.0187699	-0.000394972	-0.200772	-0.0174088
	1.04497	0.821504	2.85408	3.12434		0.0507333	0.00222968	-0.167966	-0.00439853
	1.08334	0.866158	2.79638	3.08904		0.0740469	-0.0106972	-0.155981	0.0109642
	1.09343	0.900283	2.75765	3.07622		0.0632952	-0.0169993	-0.176939	0.00699749
	1.08494	0.890183	2.73172	3.09709		0.0202456	-0.00500368	-0.197604	-0.0103988
	1.08818	0.854686	2.69494	3.11936		-0.0274513	-0.000541522	-0.182965	-0.000566352
	1.10508	0.849108	2.64723	3.09373		-0.0522146	-0.0206604	-0.145465	0.0557307
	1.11469	0.878175	2.62026	3.01585		-0.0455096	-0.0414751	-0.128275	0.108547
	1.10321	0.895579	2.63422	2.93311		-0.0219142	-0.0393884	-0.1444	0.0971146
	1.07423	0.882921	2.66122	2.89273		-0.0102982	-0.0230522	-0.173796	0.038308
	1.05049	0.864628	2.66779	2.90609		-0.0206941	-0.0066025	-0.189819	-0.00375866
	1.05926	0.860586	2.64649	2.94228		-0.040329	0.00287407	-0.180489	0.00388551
	1.09429	0.877852	2.61625	2.95731		-0.0545101	0.00260137	-0.158554	0.0428402
	1.117	0.902532	2.60543	2.94064		-0.0624918	0.00679318	-0.16159	0.0757452
	1.10722	0.898615	2.6268	2.92196		-0.0695499	0.0275319	-0.20251	0.0717515
	1.07634	0.862055	2.65363	2.91401		-0.0769627	0.0475611	-0.245972	0.0522609
	1.04571	0.834889	2.64848	2.89315		-0.0833559	0.0389768	-0.249312	0.0695048
	1.02914	0.840583	2.61826	2.84349		-0.0787988	0.00561027	-0.21782	0.126365
	1.02835	0.851903	2.59959	2.77898		-0.0538961	-0.0248584	-0.186183	0.157962
	1.03078	0.837753	2.60492	2.72447		-0.0193927	-0.0393394	-0.181962	0.123297
	1.02545	0.80141	2.61006	2.70166		0.00345869	-0.0463178	-0.203085	0.0420641
	1.02482	0.766517	2.58539	2.70275		0.0115581	-0.0558556	-0.212193	-0.0360829
	1.03905	0.758165	2.52568	2.68978		0.00980009	-0.0709541	-0.174075	-0.068081
	1.04786	0.779578	2.46818	2.64608		-0.00465581	-0.0857321	-0.108161	-0.0427252
	1.02991	0.802005	2.46154	2.59934		-0.0225848	-0.0750789	-0.0746382	-0.000654724
	0.986211	0.797138	2.50159	2.57796		-0.0260486	-0.0242697	-0.0998637	0.0103201
	0.934606	0.771294	2.52529	2.5765		-0.0223756	0.0342379	-0.162048	-0.00448913
	0.9074	0.751881	2.48367	2.56778		-0.0223663	0.0559358	-0.220235	-0.00596659
	0.929502	0.752148	2.39206	2.53178		-0.00627202	0.039636	-0.24441	0.0166983
	0.974935	0.760842	2.31877	2.47949		0.0274915	0.0160872	-0.228825	0.0414319
	0.988019	0.754851	2.31867	2.44894		0.0440185	0.0102034	-0.199191	0.050011
	0.958784	0.723368	2.3781	2.46402		0.0354651	0.0303663	-0.181227	0.0419992
	0.927182	0.68477	2.42615	2.49916		0.0236152	0.0520377	-0.165801	0.0319211
	0.924082	0.670244	2.42105	2.5104		0.00946818	0.0346737	-0.135405	0.0405436
	0.953291	0.679297	2.3857	2.48668		-0.00711594	-0.0138992	-0.109819	0.0682261
	0.995989	0.680238	2.36598	2.44598		-0.00524884	-0.0432368	-0.117965	0.0868754
	1.0158	0.655915	2.3721	2.41432		0.00889356	-0.0326588	-0.161818	0.0913338
	0.996707	0.627612	2.37622	2.40564		0.00505756	-0.0064286	-0.214738	0.107545
	0.968444	0.631255	2.35268	2.40535		-0.00822951	0.0125374	-0.246353	0.143065
	0.964488	0.671229	2.31962	2.38956		-0.00272941	0.0164688	-0.240846	0.167351
	0.975088	0.707021	2.31596	2.35893		0.00868099	0.00664456	-0.224298	0.159005
	0.970953	0.696287	2.3457	2.33646		0.0113006	0.00444204	-0.232145	0.11881
	0.940025	0.638284	2.36899	2.3265		0.0190892	0.0228943	-0.257268	0.0666558
	0.884864	0.578482	2.35058	2.32291		0.027131	0.032204	-0.258517	0.0273139
	0.823025	0.563568	2.29731	2.31943		0.00974432	0.00924178	-0.221438	0.0179477
	0.794187	0.588286	2.2495	2.30991		-0.0301654	-0.0181041	-0.175953	0.029213
	0.811722	0.603545	2.23735	2.30423		-0.0673814	-0.0218415	-0.156841	0.0491006
	0.838906	0.583693	2.24302	2.31595		-0.0916808	-0.0107393	-0.173076	0.0794438
	0.846592	0.554368	2.22088	2.33771		-0.0872903	0.00588453	-0.204233	0.118158
	0.850075	0.547769	2.1661	2.34365		-0.0398675	0.0211978	-0.22028	0.147514
	0.869335	0.569943	2.12414	2.31924		0.0257552	0.0153176	-0.212148	0.161406
	0.890871	0.603077	2.13197	2.27193		0.0723768	-0.00373926	-0.203536	0.168953
	0.894955	0.609848	2.17682	2.22297		0.0924736	-0.00409735	-0.21113	0.164642
	0.878819	0.576811	2.20224	2.19281		0.094657	0.00606705	-0.215578	0.139038
	0.854868	0.549766	2.16113	2.1784		0.0791295	-0.0112169	-0.196546	0.111061
	0.843419	0.571778	2.07196	2.16203		0.0566317	-0.0531947	-0.164023	0.10369
	0.856609	0.616611	2.01783	2.13632		0.0450717	-0.0865343	-0.140725	0.114035
	0.883306	0.631815	2.04946	2.11769		0.0415327	-0.089951	-0.149483	0.131865
	0.893672	0.60552	2.13433	2.12163		0.0294009	-0.0571605	-0.194332	0.150809
	0.876934	0.561292	2.19624	2.14261		0.00838189	-0.00798387	-0.24686	0.158994
	0.855265	0.533497	2.18771	2.15305		-0.00541457	0.00940545	-0.260119	0.153347
	0.846287	0.549256	2.11859	2.12426		-0.00804711	-0.0306569	-0.227551	0.148123
	0.844328	0.590142	2.05429	2.0666		-0.0008643	-0.0851193	-0.18628	0.141483
	0.839331	0.599141	2.04756	2.02497		0.012251	-0.0971247	-0.171015	0.121343
	0.826448	0.565541	2.07518	2.02956		0.0227741	-0.0628681	-0.176091	0.0982171
	0.807903	0.537429	2.07805	2.05781		0.0237068	-0.0150942	-0.171315	0.0956129
	0.803025	0.538889	2.04578	2.07232		0.0205514	0.0151859	-0.134077	0.106505
	0.824638	0.54796	2.01392	2.05784		0.0246529	0.0154909	-0.0790122	0.116248
	0.853798	0.541176	2.00722	2.02869		0.0321385	-0.00287299	-0.0478974	0.12494
	0.862846	0.510478	2.0147	2.01645		0.0362919	-0.0136334	-0.072957	0.132921
	0.851668	0.464123	2.00214	2.03116		0.0351938	-0.0144327	-0.133219	0.127586
	0.834652	0.439728	1.95162	2.03927		0.0278573	-0.0296976	-0.183363	0.118934
	0.81775	0.460148	1.90036	2.01617		0.0182707	-0.0629584	-0.211353	0.128679
	0.804362	0.484133	1.90176	1.98358		0.0147601	-0.0867399	-0.231222	0.156408
	0.792297	0.468538	1.94793	1.97267		0.0165081	-0.0791735	-0.243348	0.186816
	0.773938	0.42476	1.97969	1.99214		0.0124539	-0.0483584	-0.241221	0.213053
	0.754278	0.388486	1.96543	2.028		0.00651666	-0.016426	-0.229294	0.219756
	0.746397	0.383446	1.92936	2.043		0.0137653	0.00104195	-0.209041	0.198499
	0.749729	0.409218	1.90859	2.00906		0.0294662	0.0013728	-0.188663	0.173815
	0.753282	0.436824	1.91557	1.95062		0.0383358	-0.00168344	-0.184035	0.171233
	0.755669	0.433897	1.92293	1.91534		0.0394882	0.00439388	-0.194202	0.180834
	0.756359	0.407113	1.89421	1.91408		0.0277116	0.00661402	-0.195	0.186031
	0.750397	0.389144	1.83822	1.92539		-0.00855507	-0.0187076	-0.174695	0.184985
	0.74732	0.394126	1.81349	1.92465		-0.0486646	-0.0603322	-0.145246	0.175788
	0.753725	0.409203	1.85146	1.90215		-0.0601875	-0.0845094	-0.126678	0.156431
	0.75195	0.416658	1.91824	1.87917		-0.0472519	-0.0844643	-0.134539	0.138323
	0.730747	0.40923	1.94468	1.88748		-0.0284211	-0.0728491	-0.170675	0.137422
	0.704214	0.397116	1.89073	1.92149		-0.000819724	-0.0619758	-0.207388	0.152517
	0.684033	0.397863	1.78709	1.94		0.0259932	-0.0634944	-0.216876	0.176369
	0.672592	0.409268	1.7148	1.91836		0.0316601	-0.0752853	-0.205203	0.199189
	0.676154	0.411094	1.71923	1.8706		0.0298657	-0.0712639	-0.205228	0.209542
	0.690304	0.396142	1.76456	1.8335		0.037034	-0.0454826	-0.218843	0.196845
	0.69486	0.381293	1.7839	1.836		0.0286396	-0.0304937	-0.224801	0.176748
	0.690089	0.382308	1.75484	1.8727		-0.000868374	-0.0419635	-0.213418	0.16956
	0.695839	0.392057	1.71688	1.89478		-0.0140874	-0.057721	-0.189105	0.177884
	0.713919	0.391748	1.72241	1.87004		0.000651163	-0.0529096	-0.164461	0.194747
	0.729009	0.372498	1.76531	1.82525		0.0191688	-0.0169416	-0.161361	0.221782
	0.736398	0.352408	1.78162	1.79884		0.0321859	0.0394435	-0.185076	0.250283
	0.737159	0.354109	1.72955	1.79246		0.0398691	0.0729252	-0.210512	0.268475
	0.730805	0.375732	1.64657	1.78638		0.024782	0.0445478	-0.221921	0.277721
	0.725492	0.395892	1.60641	1.76813		-0.00245059	-0.0183749	-0.229112	0.285221
	0.734284	0.390617	1.64077	1.74279		-0.00572461	-0.0549052	-0.236766	0.290612
	0.752071	0.357952	1.70531	1.73743		0.0120553	-0.0536825	-0.239929	0.298
	0.759028	0.330272	1.72681	1.76855		0.0224467	-0.0424454	-0.235916	0.307218
	0.753662	0.332189	1.6877	1.80637		0.0236763	-0.0381086	-0.220885	0.30346
	0.745468	0.348735	1.64367	1.80885		0.0309167	-0.0473138	-0.194842	0.277552
	0.735678	0.353768	1.65457	1.76104		0.0389388	-0.0621405	-0.177111	0.251403
	0.725054	0.337084	1.71063	1.68417		0.0432633	-0.0473144	-0.18609	0.246712
	0.717068	0.303202	1.75089	1.61958		0.0484679	0.00443578	-0.205256	0.25479
	0.707231	0.276823	1.72913	1.59849		0.0422361	0.0413542	-0.202569	0.255596
	0.685759	0.287091	1.66771	1.61423		0.0161084	0.0313339	-0.172687	0.242824
	0.660087	0.318214	1.63338	1.63777		-0.0073457	1.30361e-05	-0.145771	0.218014
	0.648143	0.327613	1.66219	1.656		-0.00114154	-0.0211398	-0.146824	0.192493
	0.651355	0.31001	1.70934	1.66951		0.0269751	-0.0218304	-0.181781	0.190301
	0.659714	0.288998	1.7086	1.67862		0.0540672	0.00272054	-0.226862	0.209936
	0.667758	0.276395	1.65431	1.67357		0.0635624	0.0328011	-0.241126	0.228324
	0.67219	0.276615	1.59996	1.6493		0.0524304	0.0304568	-0.209349	0.243843
	0.666003	0.286116	1.58955	1.62102		0.029746	-0.000370012	-0.163079	0.270167
	0.654001	0.280781	1.61735	1.62313		0.00837308	-0.0253347	-0.13508	0.287457
	0.64581	0.253316	1.63356	1.66668		-0.00876994	-0.0392406	-0.130502	0.275763
	0.632536	0.242255	1.59747	1.70958		-0.0306882	-0.0639443	-0.137588	0.242458
	0.6046	0.272258	1.53447	1.70039		-0.0486334	-0.0977147	-0.146947	0.203229
	0.582267	0.308024	1.50803	1.63112		-0.0409559	-0.124613	-0.155249	0.166824
	0.588861	0.310174	1.5299	1.54133		-0.00477077	-0.141873	-0.171386	0.154976
	0.616849	0.284084	1.555	1.48288		0.0355156	-0.141121	-0.198256	0.174488
	0.644422	0.248526	1.54483	1.48259		0.0517198	-0.118944	-0.214608	0.19814
	0.653733	0.225855	1.50102	1.51984		0.0360672	-0.0963241	-0.197478	0.201046
	0.639493	0.23448	1.4624	1.54916		-0.00242199	-0.0887451	-0.157477	0.191148
	0.620548	0.256407	1.47412	1.55732		-0.036409	-0.0753393	-0.134989	0.175169
	0.618911	0.254506	1.53397	1.56584		-0.0415704	-0.0332759	-0.150243	0.154151
	0.629917	0.233831	1.5844	1.58912		-0.0288578	0.0227371	-0.185102	0.14466
	0.632209	0.229508	1.58525	1.61707		-0.0278601	0.0591739	-0.214227	0.161129
	0.623635	0.243729	1.54964	1.62101		-0.0494021	0.0500055	-0.225492	0.185635
	0.61537	0.255594	1.50974	1.57382		-0.0810713	-0.00421809	-0.219332	0.203165
	0.612701	0.251794	1.47763	1.49325		-0.103215	-0.0679041	-0.216031	0.221021
	0.619775	0.225988	1.44848	1.43797		-0.0960053	-0.0956862	-0.229048	0.235982
	0.631746	0.19032	1.41523	1.43322		-0.0656806	-0.0844311	-0.236739	0.234945
	0.631227	0.171952	1.39405	1.44537		-0.0486905	-0.0763316	-0.214746	0.225607
	0.61595	0.176898	1.41486	1.43713		-0.0601482	-0.0955875	-0.179631	0.221204
	0.605869	0.185118	1.47785	1.40776		-0.0666408	-0.120728	-0.161574	0.220134
	0.607799	0.18648	1.53005	1.38485		-0.0494477	-0.123567	-0.171242	0.231076
	0.606337	0.190293	1.5184	1.39763		-0.0284552	-0.101824	-0.187757	0.259931
	0.594886	0.202763	1.45251	1.43481		-0.014751	-0.0656847	-0.178347	0.289638
	0.57945	0.220735	1.39671	1.44437		-0.00814567	-0.0287938	-0.12365	0.299714
	0.564319	0.241232	1.40458	1.39793		-0.0183683	-0.00175563	-0.054688	0.298016
	0.563324	0.258138	1.47088	1.32795		-0.0327591	0.0261348	-0.0263908	0.293896
	0.584042	0.264599	1.53642	1.28619		-0.0190391	0.0629333	-0.0512615	0.286536
	0.6063	0.265025	1.5488	1.29372		0.00821256	0.0823019	-0.0846388	0.276367
	0.611979	0.26356	1.5136	1.32681		0.00876372	0.0579499	-0.0860049	0.271838
	0.612816	0.256534	1.48464	1.33668		-0.0062939	0.00454646	-0.0660988	0.271241
	0.621076	0.239615	1.50219	1.30173		-0.00303032	-0.0448093	-0.0573444	0.271064
	0.630249	0.215722	1.5522	1.25664		0.0141839	-0.0718424	-0.0775233	0.275999
	0.635418	0.195445	1.57903	1.2505		0.0347039	-0.0690889	-0.116671	0.286807
	0.639061	0.193724	1.5423	1.28404		0.0556392	-0.0491844	-0.132263	0.28729
	0.636388	0.220125	1.45883	1.31969		0.0519485	-0.0421107	-0.0984982	0.273208
	0.627655	0.26099	1.38565	1.33617		0.0160812	-0.0488345	-0.0493535	0.254726
	0.629415	0.286679	1.36562	1.33923		-0.0107707	-0.0388056	-0.0296967	0.237986
	0.644022	0.28489	1.38977	1.35514		-0.00273419	-0.00782059	-0.0389002	0.22023
	0.647297	0.270109	1.41604	1.39259		0.00528359	0.013363	-0.0492664	0.201212
	0.620011	0.262745	1.41887	1.41595		-0.0111489	0.0111581	-0.0433964	0.177664
	0.568908	0.262937	1.42187	1.37791		-0.0299921	-0.00350328	-0.0233601	0.152983
	0.518802	0.258856	1.45102	1.28474		-0.0345495	-0.0189142	-0.0198943	0.144171
	0.49785	0.250458	1.48888	1.19829		-0.0201869	-0.0144849	-0.0570891	0.159883
	0.51836	0.238784	1.49167	1.16626		0.0134575	0.0225001	-0.113924	0.184001
	0.552435	0.222995	1.44082	1.18993		0.0460575	0.0580657	-0.139817	0.193192
	0.559728	0.214078	1.3635	1.22341		0.0452039	0.0479825	-0.125358	0.18613
	0.543754	0.213851	1.31348	1.22279		0.0182608	0.00625512	-0.104942	0.171658
	0.540651	0.204702	1.31941	1.19736		0.00122792	-0.0250708	-0.104313	0.157188
	0.567784	0.183546	1.35603	1.19278		0.00337214	-0.0335938	-0.113202	0.156322
	0.603759	0.170455	1.37894	1.22236		0.00877022	-0.0203456	-0.112234	0.187509
	0.62159	0.172348	1.38028	1.24963		0.0077413	0.00888234	-0.0931658	0.23926
	0.61908	0.186971	1.37698	1.23518		0.00264119	0.0313654	-0.0635722	0.285769
	0.61054	0.22499	1.38102	1.17768		-0.0023372	0.0376259	-0.0468466	0.31155
	0.61373	0.273227	1.38727	1.12475		0.00241237	0.054198	-0.0569546	0.302643
	0.638688	0.290747	1.38524	1.12259		0.0192929	0.0914044	-0.0681242	0.248577
	0.669018	0.267937	1.36864	1.16454		0.0348832	0.114729	-0.0541757	0.179113
	0.67208	0.235448	1.35445	1.20351		0.0383503	0.0986866	-0.0247947	0.133142
	0.641745	0.214008	1.36906	1.21081		0.0353949	0.0547373	-0.00210798	0.118183
	0.604536	0.209346	1.40364	1.19964		0.0410732	0.00875027	-0.000765745	0.126882
	0.581331	0.223597	1.41523	1.19903		0.0509689	-0.0144042	-0.026413	0.159795
	0.57289	0.239938	1.38723	1.22611		0.0490968	-0.0025033	-0.0634622	0.197895
	0.571351	0.234731	1.35003	1.26327		0.0268006	0.0248118	-0.0842598	0.2167
	0.563049	0.216331	1.33733	1.26706		-0.00822385	0.0352346	-0.086454	0.215012
	0.539958	0.206386	1.35797	1.22002		-0.0300896	0.0383132	-0.0915896	0.20394
	0.519713	0.19378	1.38601	1.15482		-0.0193903	0.0633406	-0.107	0.186289
	0.519974	0.166785	1.38361	1.11404		0.0113925	0.101915	-0.112812	0.175858
	0.530076	0.14255	1.34536	1.10631		0.0210512	0.117263	-0.0883607	0.191048
	0.531801	0.133276	1.31451	1.11545		-0.00959153	0.0955461	-0.0400224	0.219981
	0.521302	0.13428	1.3251	1.11942		-0.0577571	0.053048	-0.000759792	0.233327
	0.506102	0.143417	1.36454	1.11112		-0.0880128	0.0140401	0.000981357	0.232008
	0.497969	0.154278	1.39438	1.11645		-0.0803973	-0.001174	-0.0359106	0.235448
	0.506477	0.150054	1.39184	1.15881		-0.0399749	0.00414256	-0.0728508	0.239779
	0.520301	0.134141	1.36419	1.21335		-0.000527788	0.00290035	-0.0734281	0.239119
	0.519199	0.130708	1.33978	1.24172		0.00797348	-0.0188375	-0.0515416	0.237242
	0.510333	0.146773	1.33299	1.2378		-0.000500491	-0.0341404	-0.0561358	0.229655
	0.515855	0.169451	1.32286	1.21535		0.00533762	-0.0143915	-0.0931411	0.212779
	0.532242	0.183379	1.27958	1.19072		0.0232754	0.0231872	-0.125592	0.20704
	0.538529	0.179529	1.21012	1.1688		0.0316253	0.0410631	-0.122797	0.214298
	0.522406	0.164622	1.15376	1.12978		0.0239793	0.0222226	-0.0899361	0.211289
	0.488735	0.158382	1.14449	1.05765		-0.00350188	-0.0260247	-0.0667086	0.193592
	0.462479	0.16758	1.17617	0.983182		-0.0424397	-0.0691098	-0.0882962	0.18134
	0.473559	0.178391	1.21231	0.956149		-0.0532176	-0.065416	-0.136842	0.182058
	0.509566	0.175894	1.21941	0.990315		-0.0232087	-0.0220437	-0.153901	0.193674
	0.519848	0.16417	1.20025	1.06027		0.00256039	0.00942726	-0.114686	0.213964
	0.488194	0.158746	1.18489	1.12363		-0.0013225	0.016908	-0.0633119	0.238323
	0.449376	0.162519	1.19171	1.14908		-0.00890707	0.0307981	-0.0566981	0.255374
	0.432691	0.163825	1.20767	1.14151		-0.00940541	0.0583404	-0.104627	0.264863
	0.441828	0.147711	1.20697	1.12964		-0.0144403	0.0814482	-0.167222	0.266459
	0.46667	0.113749	1.18694	1.11884		-0.0176521	0.0853717	-0.194263	0.249028
	0.482702	0.0853738	1.17723	1.09992		-0.0170506	0.0637657	-0.168817	0.207045
	0.474047	0.0889462	1.20668	1.08273		-0.0270773	0.0300429	-0.12074	0.165048
	0.461981	0.124711	1.26036	1.08949		-0.0257598	0.0228411	-0.0974391	0.148486
	0.473063	0.163733	1.29406	1.12086		0.022154	0.0565183	-0.098735	0.159364
	0.495038	0.182597	1.2801	1.14906		0.0846633	0.0925354	-0.090727	0.187747
	0.497442	0.187328	1.23445	1.139		0.109342	0.100269	-0.0618077	0.218233
	0.476269	0.194268	1.19873	1.06695		0.0960202	0.0922109	-0.034001	0.234644
	0.448711	0.207365	1.20093	0.962463		0.0726325	0.0837364	-0.0275604	0.241122
	0.435239	0.214804	1.22507	0.889608		0.0518552	0.075827	-0.0491787	0.256598
	0.451775	0.200522	1.23682	0.887523		0.0478534	0.0745602	-0.0762458	0.277174
	0.486285	0.160964	1.22983	0.940308		0.0642793	0.0726659	-0.074026	0.285167
	0.501205	0.116962	1.22165	1.00368		0.0681252	0.0475333	-0.0435899	0.275084
	0.479685	0.0973635	1.21991	1.04279		0.0440359	0.00964966	-0.0269546	0.25627
	0.452578	0.0945465	1.22589	1.0548		0.0237382	-0.00967772	-0.0466772	0.238282
	0.45383	0.0768582	1.2286	1.065		0.0291701	-0.0126437	-0.0813342	0.23406
	0.47498	0.0496953	1.21431	1.0828		0.0384283	-0.0149349	-0.099256	0.249629
	0.488188	0.0384267	1.18715	1.09263		0.0262349	-0.00907322	-0.0947816	0.271152
	0.482317	0.0483552	1.1732	1.08426		-0.00728847	0.0122971	-0.0845259	0.276086
	0.468511	0.0777163	1.17932	1.06716		-0.0467302	0.0428035	-0.0928846	0.270437
	0.466554	0.115233	1.18688	1.05989		-0.0672834	0.0865707	-0.123686	0.275918
	0.487424	0.122317	1.17667	1.07447		-0.0558708	0.135319	-0.150205	0.292375
	0.519477	0.0853868	1.14045	1.09627		-0.0332659	0.149099	-0.142865	0.299367
	0.533422	0.049799	1.09173	1.08944		-0.0340896	0.109217	-0.114707	0.29357
	0.518197	0.0512725	1.06774	1.04611		-0.0548101	0.054848	-0.107544	0.278475
	0.495565	0.07496	1.08568	0.99716		-0.0638978	0.0370299	-0.127615	0.268121
	0.488941	0.0970821	1.11208	0.975113		-0.0485436	0.060251	-0.144353	0.28852
	0.49591	0.103295	1.11491	0.987205		-0.0235022	0.101137	-0.137161	0.33813
	0.503848	0.083409	1.10446	1.01579		-0.0136521	0.136172	-0.111181	0.370624
	0.50305	0.0595081	1.10417	1.03625		-0.0243882	0.151629	-0.0935584	0.360298
	0.492297	0.0635879	1.11955	1.04065		-0.0387511	0.157332	-0.113085	0.330472
	0.489815	0.0810979	1.14314	1.04895		-0.0307889	0.171302	-0.158307	0.306684
	0.514698	0.0753242	1.15046	1.0693		-0.00101383	0.182042	-0.184116	0.296722
	0.551036	0.0492727	1.12294	1.07807		0.0159423	0.156228	-0.167537	0.303438
	0.559808	0.0322715	1.08262	1.05931		-0.000449896	0.0994892	-0.136404	0.317399
	0.531584	0.0284314	1.07029	1.03084		-0.0289444	0.053783	-0.124224	0.320813
	0.489238	0.0294726	1.08724	1.01906		-0.0333226	0.0455136	-0.141912	0.320577
	0.455719	0.0342516	1.10533	1.03219		-0.0041594	0.0680291	-0.173537	0.335887
	0.442302	0.0344089	1.10119	1.05812		0.0335624	0.0946671	-0.195065	0.357097
	0.440353	0.0317988	1.07308	1.06797		0.042015	0.0946417	-0.188508	0.358475
	0.430841	0.0443644	1.04056	1.04478		0.00418452	0.0582455	-0.163464	0.341546
	0.416582	0.0697239	1.0289	1.00802		-0.0477317	0.0178082	-0.14861	0.320283
	0.420526	0.082911	1.03128	0.981805		-0.0640033	0.0133781	-0.150421	0.302392
	0.445248	0.0743184	1.02278	0.965374		-0.0456863	0.0432258	-0.146365	0.303816
	0.46598	0.0562422	1.00111	0.953783		-0.0361502	0.0702425	-0.126722	0.336038
	0.466954	0.0424653	0.988992	0.949067		-0.0521246	0.0714959	-0.104979	0.370495
	0.448466	0.0429744	0.993494	0.942118		-0.0777601	0.0582893	-0.0944986	0.3783
	0.418978	0.0553461	0.998779	0.925237		-0.0929724	0.0497664	-0.104981	0.366954
	0.401312	0.061984	0.984197	0.901207		-0.0771203	0.0577781	-0.133038	0.355636
	0.410183	0.0559514	0.946725	0.874104		-0.0281937	0.0684525	-0.148551	0.34803
	0.42583	0.052834	0.913391	0.847493		0.0140904	0.0446456	-0.138017	0.35074
	0.428235	0.0674652	0.919467	0.829377		0.0178473	-0.0169127	-0.124669	0.363479
	0.426284	0.0969257	0.971415	0.820679		0.00800577	-0.0621369	-0.127061	0.374493
	0.429654	0.122494	1.03327	0.817597		0.011566	-0.0495046	-0.13572	0.378536
	0.429886	0.123939	1.05873	0.825006		0.0156061	0.00167883	-0.130057	0.384097
	0.420162	0.102826	1.03359	0.841447		0.0100313	0.0539803	-0.104952	0.391235
	0.397536	0.0839869	0.991237	0.855548		-0.001158	0.0851266	-0.0727977	0.388278
	0.357892	0.0918573	0.980123	0.867081		-0.0305736	0.0898668	-0.0624649	0.37497
	0.319495	0.120232	1.01009	0.887818		-0.0725714	0.0888947	-0.0878459	0.364604
	0.318077	0.135157	1.04385	0.904318		-0.0842139	0.0995757	-0.128627	0.365392
	0.356306	0.113962	1.04335	0.896001		-0.0526518	0.0999717	-0.146243	0.372293
	0.396454	0.0685948	1.00988	0.870932		-0.0235697	0.068158	-0.132567	0.37475
	0.411418	0.0319197	0.979457	0.861465		-0.0210511	0.0315201	-0.119482	0.354803
	0.406978	0.0191307	0.982872	0.887744		-0.0210841	0.027376	-0.132412	0.303509
	0.39946	0.0142934	1.0156	0.938084		-0.0117783	0.0537817	-0.162906	0.246015
	0.399634	-0.00229255	1.03796	0.981022		0.00550614	0.0914629	-0.189018	0.218405
	0.410552	-0.0305999	1.02521	0.990905		0.0330395	0.119568	-0.190907	0.22419
	0.417163	-0.0503999	0.986848	0.983304		0.0500776	0.109581	-0.173602	0.250813
	0.402632	-0.0371368	0.948824	0.989662		0.0289601	0.066725	-0.172069	0.289682
	0.383483	0.000103478	0.923264	1.00778		-0.0138391	0.046343	-0.204972	0.328829
	0.38787	0.0171641	0.908037	1.01011		-0.0382866	0.0713177	-0.23958	0.355266
	0.408274	-0.00795151	0.892517	0.979678		-0.0453531	0.0958289	-0.244315	0.370014
	0.408405	-0.0438731	0.878723	0.92226		-0.0516937	0.0865721	-0.22259	0.371385
	0.366892	-0.0511505	0.885403	0.858718		-0.052814	0.0549927	-0.197711	0.352355
	0.302338	-0.015985	0.914905	0.819196		-0.0429638	0.0199293	-0.185502	0.32078
	0.256442	0.0510923	0.936755	0.813681		-0.0249753	0.00497859	-0.180443	0.304551
	0.261643	0.103237	0.927491	0.830209		0.00304939	0.0264945	-0.160417	0.311492
	0.31007	0.0964457	0.900827	0.850763		0.032533	0.0594559	-0.112399	0.330807
	0.360722	0.0579025	0.886958	0.854943		0.0372236	0.0672677	-0.0628368	0.355617
	0.383556	0.0460103	0.904793	0.834548		0.0136523	0.0590276	-0.0589281	0.383557
	0.388092	0.0646536	0.943846	0.804727		-0.011106	0.059524	-0.112396	0.402214
	0.397442	0.0825081	0.963232	0.790078		-0.015127	0.0670349	-0.177887	0.411711
	0.411454	0.0871927	0.928159	0.791871		-0.00739368	0.0720246	-0.206571	0.424585
	0.417205	0.0779771	0.859837	0.802823		-0.00450663	0.0745252	-0.189032	0.42823
	0.41063	0.0596801	0.811884	0.816368		-0.0114306	0.0722839	-0.146876	0.403149
	0.393204	0.0506393	0.808983	0.822867		-0.022767	0.0638969	-0.107806	0.364942
	0.369929	0.0547602	0.836171	0.818824		-0.0221951	0.0654065	-0.0875729	0.337735
	0.355095	0.0469201	0.865736	0.803953		-0.00410284	0.0828164	-0.0687545	0.327382
	0.351695	0.0264838	0.870684	0.773337		0.0135524	0.0887974	-0.04179	0.342142
	0.344144	0.0274953	0.85479	0.725961		0.00880393	0.0683041	-0.0297665	0.382339
	0.329727	0.0550221	0.848357	0.684091		-0.0138565	0.0440827	-0.0505395	0.419673
	0.322354	0.0820196	0.863489	0.670961		-0.0297354	0.0380435	-0.0877675	0.432479
	0.329873	0.0903292	0.869708	0.680844		-0.0307186	0.0437785	-0.118856	0.433595
	0.347299	0.0795982	0.849379	0.699743		-0.0266469	0.0511477	-0.135707	0.435646
	0.36428	0.0572647	0.817621	0.720117		-0.032886	0.0557553	-0.143382	0.434864
	0.367896	0.0502072	0.798559	0.736091		-0.0548929	0.0535393	-0.153912	0.432027
	0.354469	0.0760995	0.803306	0.750337		-0.0744066	0.0495731	-0.176532	0.43595
	0.344585	0.10003	0.820353	0.773414		-0.0635212	0.0450761	-0.200469	0.44088
	0.354764	0.0826751	0.822072	0.796347		-0.0284962	0.0263461	-0.198783	0.447265
	0.373219	0.0368388	0.80357	0.802739		-0.00821821	-0.0173078	-0.163359	0.47086
	0.383414	0.00225021	0.795597	0.798394		-0.0188497	-0.0662864	-0.133449	0.512433
	0.384271	0.00532298	0.821774	0.797964		-0.0367908	-0.089591	-0.148618	0.540089
	0.381095	0.0425569	0.869086	0.803818		-0.0411435	-0.0796063	-0.198949	0.537645
	0.381098	0.0773322	0.904695	0.815421		-0.0314951	-0.0515723	-0.244163	0.510714
	0.389478	0.0757049	0.905848	0.823645		-0.0106053	-0.0191178	-0.251221	0.463704
	0.393625	0.0500709	0.87917	0.805445		-0.000984067	0.00667081	-0.214402	0.40795
	0.373544	0.0388677	0.858017	0.759976		-0.0281296	0.0143203	-0.164978	0.366587
	0.340475	0.0535215	0.867486	0.712335		-0.0692251	0.0114042	-0.141437	0.343004
	0.326293	0.0680231	0.891695	0.679527		-0.0799526	0.00977239	-0.133645	0.329088
	0.340751	0.0537987	0.891859	0.661774		-0.0643245	-0.00425684	-0.121566	0.333648
	0.371436	0.00899929	0.853821	0.659648		-0.0530597	-0.0365794	-0.118028	0.362881
	0.399414	-0.0360094	0.802835	0.663346		-0.0519041	-0.0631525	-0.141865	0.397681
	0.404351	-0.0464099	0.771662	0.663548		-0.0610804	-0.0665704	-0.186662	0.41151
	0.386315	-0.0217713	0.766465	0.663582		-0.0854894	-0.0461213	-0.236276	0.397283
	0.377029	0.00958661	0.767265	0.661279		-0.0981276	-0.0020098	-0.274131	0.374948
	0.397967	0.0232667	0.753482	0.648443		-0.074911	0.0489721	-0.286499	0.375226
	0.431498	0.0247271	0.732749	0.635682		-0.0472911	0.0776551	-0.27533	0.412243
	0.454777	0.0346354	0.728274	0.646538		-0.0441937	0.0842958	-0.257252	0.463425
	0.468995	0.056608	0.753035	0.679209		-0.043084	0.0865937	-0.232771	0.486368
	0.474556	0.0734512	0.788304	0.720171		-0.024078	0.0820058	-0.194677	0.468496
	0.458284	0.0650805	0.80377	0.762091		0.00108906	0.0642874	-0.153927	0.439382
	0.418452	0.02984	0.785309	0.790505		0.0241804	0.0478365	-0.138035	0.427335
	0.366779	-0.0081396	0.757384	0.795362		0.04401	0.0432429	-0.154645	0.428842
	0.317594	-0.0201742	0.755101	0.7818		0.0389544	0.0429581	-0.195915	0.432067
	0.289457	-0.00287844	0.784928	0.763981		0.0146722	0.0482465	-0.248165	0.42547
	0.297973	0.0130657	0.821685	0.747501		0.0104956	0.0652131	-0.283961	0.401454
	0.332345	0.00230867	0.840413	0.73687		0.0294076	0.0745855	-0.27793	0.367136
	0.359939	-0.0171601	0.843261	0.728775		0.0386206	0.0598395	-0.240996	0.344262
	0.370386	-0.0173776	0.855176	0.712951		0.0283478	0.0394191	-0.203602	0.336768
	0.373755	-0.000164254	0.88741	0.694683		0.0169039	0.0250057	-0.177501	0.338421
	0.373509	0.0166561	0.914638	0.689563		0.0117118	0.000854551	-0.164268	0.350723
	0.366757	0.0194121	0.901864	0.700696		0.0140173	-0.0300706	-0.158514	0.374587
	0.353286	-0.00125087	0.851603	0.714197		0.0227223	-0.0507331	-0.15376	0.400537
	0.333285	-0.0310691	0.796723	0.720438		0.0226491	-0.0584409	-0.16086	0.424778
	0.307571	-0.0372232	0.761163	0.71419		0.00504999	-0.0443424	-0.200324	0.44872
	0.290439	-0.0195135	0.74652	0.69939		-0.0101164	0.000457518	-0.261923	0.45991
	0.297317	-0.00879595	0.735965	0.682672		-0.00249585	0.046184	-0.306264	0.447033
	0.318597	-0.00633579	0.71501	0.663901		0.0174373	0.0528224	-0.314547	0.426095
	0.328539	0.0076297	0.695785	0.64823		0.0301804	0.0298928	-0.307892	0.411967
	0.316902	0.0269891	0.709446	0.651581		0.0327893	0.0107885	-0.303775	0.396775
	0.291674	0.0409288	0.754656	0.679723		0.035424	-0.000906235	-0.293708	0.381842
	0.263531	0.0528012	0.797473	0.712321		0.0442224	-0.0142019	-0.260561	0.384126
	0.246654	0.0546071	0.805697	0.726725		0.054452	-0.0257235	-0.205867	0.400126
	0.250168	0.0406987	0.779174	0.716549		0.0531009	-0.0320643	-0.151468	0.414992
	0.262336	0.0314304	0.744525	0.695291		0.0234455	-0.0353163	-0.133218	0.430621
	0.266584	0.0410008	0.742902	0.69459		-0.0244888	-0.0243218	-0.167859	0.442573
	0.268971	0.0463178	0.784169	0.727969		-0.060157	0.00397106	-0.22204	0.440658
	0.282547	0.0278187	0.830008	0.769004		-0.0639361	0.0213868	-0.246903	0.437536
	0.303223	-0.00332827	0.841119	0.780282		-0.0424793	0.0118172	-0.232814	0.448406
	0.323222	-0.0317284	0.822657	0.751448		-0.018645	-0.00858103	-0.197992	0.455071
	0.333619	-0.0415335	0.800334	0.698117		-0.0134724	-0.0274677	-0.164306	0.443406
	0.326832	-0.02356	0.786826	0.644506		-0.0327435	-0.0478098	-0.140256	0.42409
	0.310021	-0.000202721	0.7746	0.613925		-0.0563645	-0.0619894	-0.119613	0.406132
	0.299192	-0.00869374	0.751478	0.605752		-0.0615224	-0.0644195	-0.0936983	0.385035
	0.297161	-0.0490525	0.718706	0.596815		-0.0549685	-0.061932	-0.0761285	0.369336
	0.296973	-0.0847883	0.697186	0.576679		-0.0558949	-0.0510705	-0.0936812	0.369703
	0.300675	-0.0953747	0.702238	0.562729		-0.0600387	-0.0270567	-0.148853	0.372325
	0.30645	-0.0833563	0.717088	0.563792		-0.0552693	-0.00630404	-0.209564	0.368183
	0.301452	-0.0599136	0.71346	0.570807		-0.0451749	-0.0115384	-0.239471	0.374357
	0.284418	-0.0425512	0.688165	0.571216		-0.0366916	-0.0389294	-0.235656	0.388918
	0.264513	-0.0339849	0.664401	0.553858		-0.0328823	-0.063679	-0.209928	0.386106
	0.246375	-0.0127233	0.666013	0.522534		-0.0448108	-0.0683337	-0.176559	0.364685
	0.237434	0.0306507	0.693861	0.507118		-0.0686236	-0.0486727	-0.156152	0.344648
	0.248173	0.0746815	0.726784	0.528419		-0.0748303	-0.0175127	-0.164148	0.334301
	0.269619	0.0941748	0.740392	0.569259		-0.0636415	0.0015419	-0.190152	0.33911
	0.28347	0.0813685	0.727543	0.603313		-0.0670392	-0.000472291	-0.220237	0.359211
	0.292729	0.0491673	0.701268	0.620298		-0.0802231	-0.0021698	-0.251984	0.372844
	0.307919	0.0166166	0.666672	0.621637		-0.0744579	0.0109743	-0.275317	0.362526
	0.321612	-0.00721389	0.621093	0.617447		-0.0550212	0.0214946	-0.279455	0.339033
	0.328014	-0.0267327	0.565684	0.611484		-0.0376421	0.0215513	-0.271172	0.316804
	0.331961	-0.0436939	0.516931	0.586237		-0.018721	0.0198601	-0.254397	0.301179
	0.32699	-0.0472422	0.499157	0.539383		-0.0114805	0.00995442	-0.230865	0.303262
	0.306679	-0.029105	0.531617	0.509094		-0.0348213	-0.0108601	-0.204775	0.330817
	0.286212	0.000979158	0.603211	0.526569		-0.0664602	-0.0186982	-0.181406	0.370734
	0.278064	0.0200613	0.670157	0.578577		-0.0756395	-0.00200767	-0.156506	0.396137
	0.275662	0.0143441	0.688073	0.621199		-0.0791839	0.0193242	-0.137523	0.398275
	0.275749	-0.00801925	0.66002	0.619632		-0.0901615	0.0285944	-0.144136	0.387808
	0.281849	-0.0291545	0.639665	0.573468		-0.0879496	0.0230443	-0.174857	0.37736
	0.283109	-0.0329371	0.674193	0.529675		-0.0704286	0.00327489	-0.197862	0.372633
	0.266598	-0.0148393	0.744742	0.532042		-0.0545554	-0.0124993	-0.187193	0.372752
	0.247652	0.00649518	0.78889	0.561232		-0.0370832	0.000574372	-0.14963	0.361399
	0.245546	0.0106332	0.769256	0.5732		-0.0155787	0.034965	-0.10359	0.331549
	0.257896	0.00122375	0.707349	0.559782		-0.0198942	0.0596149	-0.0729906	0.303438
	0.275635	-0.00440838	0.649315	0.553983		-0.0538221	0.0675314	-0.0766952	0.295786
	0.296473	-0.0036114	0.622891	0.580949		-0.0767583	0.064567	-0.0997356	0.304285
	0.314678	-0.00487403	0.613042	0.629435		-0.0713464	0.0373659	-0.110809	0.323465
	0.319155	-0.00874303	0.589209	0.652846		-0.0547463	-0.0150053	-0.112215	0.350595
	0.312209	-0.0191572	0.55293	0.619259		-0.0413407	-0.0611627	-0.119224	0.374621
	0.302469	-0.0404287	0.534237	0.5587		-0.0385821	-0.0842595	-0.125454	0.387627
	0.289099	-0.0548363	0.54922	0.528505		-0.0495995	-0.0934326	-0.12681	0.394688
	0.273285	-0.0506133	0.582463	0.54852		-0.0563724	-0.0829255	-0.13224	0.394292
	0.262269	-0.0498234	0.60982	0.588031		-0.0418925	-0.0525046	-0.141599	0.374638
	0.256877	-0.0685169	0.613889	0.602992		-0.0223425	-0.0327691	-0.154296	0.337678
	0.250812	-0.0892012	0.606186	0.579587		-0.0211336	-0.0364505	-0.170307	0.301946
	0.247693	-0.100541	0.614564	0.551479		-0.0330203	-0.0463614	-0.176469	0.273119
	0.256034	-0.108687	0.641275	0.558246		-0.0360002	-0.0528946	-0.154153	0.244943
	0.266714	-0.110988	0.650033	0.586043		-0.0275612	-0.0565179	-0.109922	0.225721
	0.262278	-0.110174	0.629555	0.589546		-0.0145847	-0.0489616	-0.0670742	0.222146
	0.24186	-0.122465	0.611786	0.543746		-0.00555436	-0.0311804	-0.0382718	0.224441
	0.213093	-0.134448	0.626771	0.472402		-0.00671273	-0.0249369	-0.0166319	0.2362
	0.184749	-0.119462	0.669102	0.431646		-0.0180755	-0.0358937	0.00154242	0.264186
	0.179129	-0.0933014	0.706535	0.459229		-0.0327608	-0.0492238	0.0124488	0.281778
	0.208908	-0.0826026	0.699807	0.524431		-0.045608	-0.0609952	0.00693809	0.268673
	0.251173	-0.0818455	0.648579	0.557355		-0.0623901	-0.0849412	-0.0266015	0.2429
	0.279541	-0.0796795	0.607169	0.5423		-0.0764909	-0.116026	-0.0872083	0.221899
	0.294449	-0.0814565	0.621999	0.526766		-0.0740006	-0.133936	-0.142567	0.203664
	0.302052	-0.0839527	0.669158	0.549428		-0.0560238	-0.133704	-0.163743	0.197337
	0.294731	-0.0786701	0.691506	0.591918		-0.034741	-0.115556	-0.16075	0.207409
	0.271759	-0.0788868	0.661653	0.601462		-0.0239346	-0.0812832	-0.155283	0.214425
	0.242508	-0.0915761	0.600064	0.548129		-0.0326319	-0.0519127	-0.157683	0.216462
	0.217892	-0.101307	0.556036	0.472822		-0.0547796	-0.0436958	-0.171946	0.239587
	0.214394	-0.102331	0.561187	0.455709		-0.0661024	-0.0389932	-0.198902	0.283509
	0.238069	-0.098179	0.590864	0.521265		-0.0535057	-0.0201173	-0.224384	0.313872
	0.270273	-0.0839593	0.594947	0.606274		-0.036693	0.0022215	-0.234755	0.310437
	0.285016	-0.0616816	0.566571	0.638778		-0.0379578	0.0194828	-0.226478	0.283693
	0.275344	-0.0512567	0.547101	0.604639		-0.0535343	0.0323887	-0.202816	0.250319
	0.249148	-0.058102	0.571279	0.538166		-0.0719851	0.0355499	-0.170055	0.23683
	0.217973	-0.0635943	0.6269	0.489153		-0.0896066	0.0255157	-0.142912	0.259563
	0.199577	-0.0529572	0.668648	0.482549		-0.0956247	0.0155358	-0.135085	0.286046
	0.198504	-0.030522	0.658086	0.492666		-0.0856284	0.0192737	-0.139201	0.271143
	0.197188	-0.0100607	0.611105	0.4893		-0.078703	0.0285863	-0.137019	0.224186
	0.192332	-0.003036	0.579133	0.483253		-0.0839067	0.034574	-0.127692	0.185158
	0.202364	-0.00433934	0.588328	0.498449		-0.0788572	0.0419942	-0.113279	0.172095
	0.228043	0.00124947	0.612584	0.531311		-0.0609734	0.0495407	-0.0943593	0.19152
	0.248731	0.0154601	0.612255	0.561073		-0.0518332	0.051984	-0.0801557	0.237609
	0.254321	0.0266741	0.577479	0.563373		-0.0445124	0.056576	-0.0871771	0.283669
	0.248069	0.0227025	0.542052	0.535668		-0.0244364	0.0626378	-0.110557	0.312393
	0.233112	0.000449932	0.546268	0.517777		-0.0118914	0.0524971	-0.134459	0.332775
	0.222533	-0.0300824	0.587328	0.545127		-0.016155	0.0307059	-0.146575	0.343937
	0.229619	-0.0554486	0.621983	0.588318		-0.0180384	0.0157541	-0.135392	0.332962
	0.243963	-0.0661402	0.616361	0.592883		-0.0212962	0.000721264	-0.104846	0.304759
	0.250186	-0.0602479	0.573027	0.549548		-0.0415738	-0.0205029	-0.0777655	0.282131
	0.252535	-0.046709	0.528551	0.491458		-0.0590209	-0.0335996	-0.0726243	0.279418
	0.252298	-0.0383679	0.515168	0.467481		-0.0517676	-0.0357727	-0.0886351	0.290783
	0.239128	-0.0406558	0.529428	0.494703		-0.0421909	-0.0345508	-0.118994	0.296431
	0.219645	-0.0521297	0.537232	0.537506		-0.0470956	-0.0204492	-0.153376	0.279689
	0.215493	-0.0759772	0.525989	0.543218		-0.0536789	0.00898417	-0.171465	0.245633
	0.229041	-0.107519	0.512903	0.513191		-0.0633838	0.0306304	-0.156082	0.229185
	0.241522	-0.127524	0.516087	0.495989		-0.0784788	0.0326246	-0.116647	0.257971
	0.244537	-0.125494	0.533604	0.514784		-0.0730573	0.0285942	-0.0800726	0.307694
	0.236385	-0.106372	0.543525	0.546879		-0.0349014	0.0231419	-0.0647569	0.327358
	0.214102	-0.0748324	0.528129	0.54968		0.00285482	0.00544468	-0.0778314	0.301096
	0.190392	-0.0413184	0.495439	0.505543		0.0181895	-0.0209051	-0.115778	0.255265
	0.184023	-0.0229743	0.477069	0.451561		0.0262519	-0.050157	-0.149282	0.231136
	0.193273	-0.0222948	0.480424	0.449549		0.0320966	-0.0941882	-0.153582	0.252823
	0.200091	-0.023664	0.483197	0.510668		0.0324517	-0.147297	-0.140184	0.30198
	0.20076	-0.0303658	0.470477	0.57593		0.0333548	-0.184282	-0.136595	0.328395
	0.201713	-0.0591951	0.450281	0.587801		0.0307118	-0.203637	-0.147729	0.309853
	0.199717	-0.0988151	0.434279	0.54176		0.00603916	-0.218664	-0.167598	0.278018
	0.193905	-0.12879	0.43405	0.487466		-0.0343882	-0.220323	-0.18284	0.269364
	0.19196	-0.151873	0.451012	0.478245		-0.0657909	-0.207372	-0.179425	0.283697
	0.193414	-0.16515	0.467691	0.512298		-0.0759627	-0.19988	-0.165996	0.298063
	0.187824	-0.159842	0.467578	0.534749		-0.0669623	-0.192978	-0.165911	0.292509
	0.174212	-0.155664	0.467447	0.513248		-0.0446478	-0.169988	-0.178708	0.25713
	0.163562	-0.164621	0.48487	0.479299		-0.0187303	-0.143006	-0.18714	0.21057
	0.163455	-0.157521	0.510898	0.478374		-0.0037171	-0.13337	-0.184883	0.191802
	0.175694	-0.11921	0.528972	0.521787		0.000654614	-0.136405	-0.182751	0.204854
	0.198369	-0.0768001	0.535183	0.567414		0.00289727	-0.137255	-0.188527	0.214045
	0.21713	-0.051336	0.528251	0.557495		0.00151969	-0.13478	-0.199442	0.208418
	0.214681	-0.0481041	0.517852	0.488444		-0.00734632	-0.130313	-0.212407	0.206562
	0.197761	-0.0737206	0.514656	0.4249		-0.0191973	-0.124887	-0.221852	0.211563
	0.184042	-0.10708	0.508287	0.418052		-0.023209	-0.126537	-0.220865	0.218173
	0.172772	-0.109855	0.488751	0.450425		-0.0162857	-0.134982	-0.210098	0.225246
	0.157993	-0.081496	0.476851	0.476328		0.00197092	-0.134795	-0.192389	0.218424
	0.144093	-0.0526072	0.490671	0.471466		0.025355	-0.12511	-0.160588	0.198212
	0.13764	-0.0403579	0.508123	0.4437		0.0387628	-0.130074	-0.122583	0.198759
	0.141597	-0.042552	0.499114	0.427765		0.0414233	-0.150873	-0.108327	0.231034
	0.161582	-0.0575868	0.457195	0.446071		0.0461233	-0.162221	-0.129339	0.249143
	0.189453	-0.0743649	0.398623	0.473792		0.0521971	-0.154395	-0.16593	0.21895
	0.203197	-0.0785809	0.353529	0.471405		0.0466867	-0.135859	-0.197421	0.16527
	0.198735	-0.0789176	0.354378	0.442843		0.0329484	-0.112798	-0.208353	0.131008
	0.189782	-0.0882783	0.396166	0.424174		0.0235942	-0.0940944	-0.187601	0.137907
	0.185667	-0.0959589	0.442221	0.43931		0.0218038	-0.0838534	-0.143477	0.181262
	0.1905	-0.0880197	0.4637	0.475963		0.0251008	-0.0682302	-0.10689	0.225587
	0.20226	-0.0700144	0.457301	0.491647		0.0311242	-0.0396301	-0.0953659	0.230379
	0.206474	-0.0543917	0.43574	0.45747		0.0250586	-0.0122403	-0.1017	0.2069
	0.195047	-0.0513437	0.417374	0.410859		-0.000506008	-0.000444835	-0.11041	0.201236
	0.183695	-0.0664326	0.406256	0.41386		-0.0193895	-0.00388755	-0.122083	0.218623
	0.18583	-0.0917684	0.387895	0.467881		-0.0121156	-0.0193732	-0.137561	0.226481
	0.192031	-0.116339	0.361566	0.51784		-9.93092e-05	-0.0506025	-0.157959	0.212329
	0.195748	-0.139198	0.355648	0.5166		0.00101687	-0.0922272	-0.183222	0.188436
	0.199713	-0.159185	0.388962	0.468912		0.00614709	-0.127207	-0.198238	0.175273
	0.198006	-0.169037	0.445505	0.429133		0.0137744	-0.150483	-0.191143	0.191827
	0.187527	-0.165174	0.485794	0.448354		0.00470856	-0.163736	-0.183437	0.220287
	0.178474	-0.144806	0.488243	0.500722		-0.0123246	-0.156934	-0.20206	0.210675
	0.173994	-0.112409	0.467882	0.514079		-0.0254563	-0.127685	-0.235189	0.145154
	0.165532	-0.0896886	0.460817	0.464281		-0.0457697	-0.0971745	-0.257568	0.0611545
	0.1569	-0.0951466	0.478421	0.399542		-0.0590302	-0.0761471	-0.258881	0.00616453
	0.160008	-0.128134	0.501032	0.378177		-0.0369016	-0.0646789	-0.239141	-0.00317396
	0.172799	-0.167522	0.507109	0.414057		-0.000120926	-0.0690993	-0.216154	0.0186837
	0.190001	-0.185106	0.494927	0.463752		0.0154509	-0.0787339	-0.21518	0.0407334
	0.216318	-0.174052	0.477125	0.468827		0.0168682	-0.0702561	-0.225776	0.0427762
	0.244144	-0.156806	0.462506	0.43286		0.0215129	-0.0543109	-0.213907	0.035156
	0.251276	-0.148846	0.443795	0.415712		0.0197424	-0.0569571	-0.172359	0.0479797
	0.235189	-0.141518	0.407083	0.447543		0.0112258	-0.0686788	-0.1316	0.0866818
	0.216468	-0.124727	0.365439	0.489205		0.0141648	-0.0692792	-0.120604	0.120827
	0.208048	-0.0985919	0.352248	0.483122		0.0196887	-0.0615871	-0.146077	0.125885
	0.206123	-0.0687004	0.384838	0.420212		0.0148092	-0.0505506	-0.187076	0.114304
	0.209749	-0.0504907	0.446663	0.345535		0.013859	-0.0401524	-0.218333	0.111751
	0.21717	-0.0516042	0.498208	0.321421		0.0258449	-0.0526276	-0.23539	0.135422
	0.219095	-0.0553551	0.504271	0.356095		0.0306806	-0.10123	-0.259032	0.181768
	0.214577	-0.0517443	0.47216	0.397335		0.0198323	-0.155334	-0.29753	0.222926
	0.208052	-0.0532781	0.441801	0.398729		0.00497538	-0.183301	-0.32116	0.239328
	0.19642	-0.0661886	0.43631	0.373503		-0.0160847	-0.193464	-0.304192	0.245054
	0.179919	-0.0790826	0.439422	0.366544		-0.0429442	-0.197024	-0.265683	0.259027
	0.174481	-0.0882667	0.436712	0.396224		-0.0563466	-0.189196	-0.240485	0.274442
	0.190742	-0.0974483	0.430592	0.436687		-0.0497921	-0.174768	-0.240375	0.280184
	0.212123	-0.10203	0.431823	0.439636		-0.0401844	-0.154037	-0.253396	0.282459
	0.221571	-0.11382	0.442948	0.394272		-0.0345603	-0.109526	-0.251627	0.290104
	0.223153	-0.154893	0.450493	0.345195		-0.0289664	-0.0546319	-0.214044	0.30493
	0.221152	-0.201596	0.428687	0.342973		-0.0261204	-0.0288071	-0.165656	0.326227
	0.207222	-0.208629	0.384311	0.387475		-0.0250022	-0.0258005	-0.151128	0.338416
	0.182751	-0.184092	0.362232	0.434067		-0.0209299	-0.00968237	-0.179579	0.313165
	0.162604	-0.165391	0.389965	0.440154		-0.0145724	0.0241156	-0.221101	0.255024
	0.152745	-0.161207	0.445826	0.404673		-0.0179071	0.0593913	-0.24412	0.210568
	0.153046	-0.165338	0.493445	0.376331		-0.0340879	0.0839797	-0.244698	0.204786
	0.163184	-0.16914	0.511088	0.393825		-0.0514914	0.0889393	-0.239027	0.216624
	0.173692	-0.153577	0.493448	0.428938		-0.0610478	0.0720232	-0.240115	0.222724
	0.172408	-0.121081	0.466354	0.434134		-0.0545056	0.046474	-0.242863	0.213419
	0.165806	-0.112689	0.462747	0.404233		-0.030491	0.0192862	-0.231485	0.183026
	0.162283	-0.14134	0.477712	0.375244		-4.26391e-05	-0.0179428	-0.199116	0.150928
	0.159032	-0.172342	0.479481	0.38012		0.0176427	-0.0631688	-0.171458	0.144561
	0.159421	-0.180794	0.456832	0.421891		0.0156675	-0.0912091	-0.181785	0.152394
	0.16819	-0.170216	0.427088	0.460436		-0.00280455	-0.0876014	-0.221688	0.149527
	0.176729	-0.152083	0.41722	0.453575		-0.0354266	-0.0675314	-0.247599	0.143921
	0.17481	-0.140449	0.43838	0.414138		-0.0718924	-0.0457718	-0.236445	0.159764
	0.166357	-0.1434	0.465497	0.389369		-0.0942388	-0.0302571	-0.195678	0.198139
	0.158537	-0.1448	0.458461	0.394076		-0.0952441	-0.0352312	-0.156207	0.24541
	0.15577	-0.124482	0.417435	0.404061		-0.0752301	-0.0573081	-0.147705	0.280097
	0.170551	-0.0950059	0.379924	0.392542		-0.0359821	-0.0674822	-0.166775	0.27609
	0.204858	-0.0794889	0.370343	0.353316		0.00517257	-0.0526438	-0.177027	0.235989
	0.23843	-0.0775178	0.378436	0.316746		0.0242597	-0.0293579	-0.163828	0.195993
	0.254086	-0.0760233	0.386058	0.322156		0.0218847	-0.0117143	-0.151651	0.175989
	0.250231	-0.0632685	0.388139	0.362936		0.0174037	-0.00277597	-0.159514	0.159356
	0.226241	-0.0342102	0.396143	0.386482		0.00976459	-0.00325504	-0.174763	0.140769
	0.186175	-0.00600506	0.416829	0.366989		-0.0134841	-0.00716936	-0.171216	0.131515
	0.147409	-0.00527261	0.442779	0.329084		-0.0356945	-0.00926249	-0.138945	0.130914
	0.119347	-0.0344931	0.455263	0.314888		-0.0391538	-0.0111502	-0.0937979	0.136079
	0.0984022	-0.0712925	0.448527	0.346858		-0.0341717	-0.0140679	-0.0738858	0.154471
	0.0927681	-0.0919814	0.437318	0.396957		-0.0241336	-0.00700638	-0.112239	0.179974
	0.110741	-0.0882962	0.439351	0.402442		-0.00273428	0.0148256	-0.186344	0.196153
	0.133782	-0.0708545	0.45041	0.342048		0.00829786	0.0310082	-0.236512	0.20365
	0.143851	-0.0617595	0.446268	0.26708		-0.00982032	0.0244821	-0.241037	0.209649
	0.148102	-0.0685835	0.411568	0.232138		-0.0317779	0.00738881	-0.227452	0.218505
	0.154829	-0.080147	0.366362	0.239131		-0.0396287	-0.00109007	-0.223235	0.240505
	0.163407	-0.086754	0.351003	0.251112		-0.0530305	0.00831808	-0.231519	0.280496
	0.180693	-0.0898048	0.377257	0.233914		-0.0707688	0.0416987	-0.238124	0.317177
	0.207737	-0.10086	0.409122	0.196728		-0.0645155	0.0819216	-0.219395	0.323913
	0.224036	-0.120954	0.399775	0.188043		-0.0391599	0.0848932	-0.186896	0.305925
	0.215668	-0.126153	0.340864	0.238174		-0.0106484	0.0390462	-0.179439	0.289979
	0.194895	-0.102122	0.274547	0.310684		0.0247302	-0.0226974	-0.202283	0.285063
	0.173241	-0.0654023	0.254108	0.35212		0.0537809	-0.0731611	-0.216801	0.280513
	0.151759	-0.0441113	0.285535	0.346145		0.0440269	-0.104289	-0.200848	0.269315
	0.140282	-0.0574455	0.325648	0.318029		0.00896642	-0.109498	-0.169676	0.253151
	0.149726	-0.0998565	0.336156	0.302622		-0.00191605	-0.0934898	-0.146918	0.235019
	0.173494	-0.136033	0.32212	0.307931		0.0128845	-0.0738098	-0.14866	0.217021
	0.197468	-0.137394	0.313258	0.307595		0.0225254	-0.0512252	-0.17147	0.192448
	0.215447	-0.121706	0.335548	0.273281		0.0239446	-0.020277	-0.183555	0.153085
	0.223462	-0.121055	0.370903	0.222216		0.0237883	-0.00157672	-0.15926	0.114127
	0.212897	-0.132236	0.37793	0.195648		0.0179727	-0.0151537	-0.120369	0.106996
	0.190356	-0.137714	0.347863	0.214416		0.0121668	-0.0379955	-0.1126	0.135901
	0.173018	-0.133964	0.321603	0.265629		0.0106144	-0.0407759	-0.140868	0.177976
	0.167093	-0.121445	0.331877	0.31717		-0.00657591	-0.0319659	-0.174214	0.214633
	0.169943	-0.109531	0.370503	0.342747		-0.0421261	-0.0224035	-0.183883	0.236246
	0.181368	-0.119384	0.404366	0.343088		-0.0669925	-0.0118569	-0.159651	0.238407
	0.196074	-0.145786	0.407839	0.33762		-0.0634615	-0.0185238	-0.120873	0.230713
	0.198073	-0.149052	0.392435	0.331113		-0.0457051	-0.0461931	-0.103919	0.227605
	0.185514	-0.121332	0.399904	0.316866		-0.0295309	-0.062358	-0.115532	0.221604
	0.174136	-0.0980419	0.443123	0.296299		-0.0202496	-0.051397	-0.125591	0.198339
	0.171011	-0.0957117	0.476047	0.280182		-0.0193802	-0.0363992	-0.124444	0.174968
	0.170368	-0.10089	0.452698	0.292149		-0.017891	-0.0224465	-0.132888	0.180815
	0.172126	-0.106478	0.385433	0.344786		-0.0139774	-0.00339354	-0.159879	0.215261
	0.176969	-0.0989156	0.325001	0.416087		-0.0191668	0.00846118	-0.185066	0.264179
	0.177513	-0.0640675	0.309371	0.457653		-0.0440474	0.00830214	-0.182961	0.314948
	0.173045	-0.0228434	0.3345	0.453614		-0.0794981	0.00357128	-0.144354	0.33786
	0.17046	-0.0033443	0.357977	0.428966		-0.103939	-0.0129849	-0.0925325	0.320088
	0.166892	-0.000603423	0.3459	0.412975		-0.10792	-0.0508535	-0.0692466	0.29882
	0.153629	-0.00238834	0.320996	0.415785		-0.0952797	-0.0880964	-0.0989159	0.303824
	0.134617	-0.0171766	0.330695	0.417917		-0.0791841	-0.0957399	-0.151319	0.314321
	0.118438	-0.0467558	0.370696	0.390502		-0.0751951	-0.0766096	-0.169868	0.311396
	0.10676	-0.0769735	0.390549	0.340199		-0.0823107	-0.0540632	-0.13453	0.303183
	0.105676	-0.0990431	0.352314	0.311913		-0.083047	-0.0449071	-0.0805627	0.295412
	0.118511	-0.101929	0.270347	0.327347		-0.0755824	-0.0552519	-0.0529706	0.300851
	0.136823	-0.0797794	0.204507	0.356568		-0.0862352	-0.079659	-0.0709875	0.334526
	0.15405	-0.0570532	0.213553	0.365822		-0.121687	-0.0940598	-0.118374	0.377811
	0.16971	-0.0692335	0.284389	0.355871		-0.149869	-0.0897417	-0.152507	0.394216
	0.17425	-0.118335	0.344105	0.349189		-0.146743	-0.0950721	-0.148855	0.387927
	0.158963	-0.16849	0.343445	0.365957		-0.12047	-0.124694	-0.13133	0.38771
	0.138577	-0.18795	0.305165	0.39693		-0.0825208	-0.151397	-0.130175	0.391335
	0.129584	-0.172208	0.281851	0.404491		-0.0431764	-0.14644	-0.137737	0.377583
	0.125713	-0.141153	0.296561	0.373676		-0.0147314	-0.110635	-0.124957	0.343819
	0.117379	-0.120594	0.320353	0.338296		0.00460788	-0.0606763	-0.0873883	0.297692
	0.101977	-0.119597	0.311569	0.331102		0.0195633	-0.0241601	-0.052755	0.254207
	0.0764133	-0.120114	0.271464	0.349412		0.0142029	-0.022067	-0.0547893	0.241909
	0.0537644	-0.105884	0.246794	0.370062		-0.0206188	-0.0415476	-0.0986638	0.264018
	0.0588878	-0.0835286	0.272864	0.369787		-0.0544669	-0.0527499	-0.149274	0.280758
	0.0879413	-0.07065	0.334122	0.34557		-0.0648344	-0.0474752	-0.164103	0.264638
	0.110616	-0.0790695	0.378835	0.328295		-0.0641176	-0.0422133	-0.138468	0.232181
	0.116824	-0.106205	0.372378	0.337194		-0.0574812	-0.0453069	-0.113583	0.208972
	0.115773	-0.13687	0.329477	0.348706		-0.0451736	-0.0451741	-0.112327	0.203133
	0.107998	-0.158298	0.290936	0.333874		-0.0550991	-0.0321306	-0.11424	0.210161
	0.0979792	-0.170068	0.274656	0.299096		-0.0923318	-0.00205702	-0.0943164	0.210345
	0.0998434	-0.177775	0.259471	0.270394		-0.112669	0.0343813	-0.0587045	0.188628
	0.111832	-0.178972	0.223537	0.275877		-0.0956219	0.0425137	-0.0360818	0.166837
	0.122244	-0.17006	0.176479	0.31259		-0.0721417	0.00481738	-0.0590098	0.177808
	0.133295	-0.155949	0.150034	0.34244		-0.0566514	-0.0394719	-0.12435	0.217366
	0.145131	-0.154071	0.158304	0.344831		-0.0390246	-0.0459531	-0.176465	0.248979
	0.141326	-0.175672	0.176729	0.341966		-0.029462	-0.0219902	-0.172821	0.253311
	0.117143	-0.205312	0.158435	0.362956		-0.0299563	0.0046231	-0.135344	0.244275
	0.0913025	-0.218803	0.0992084	0.398642		-0.0207784	0.0127572	-0.108675	0.248466
	0.0784208	-0.20078	0.0446278	0.421467		-0.00738094	-0.0125916	-0.110902	0.277893
	0.0770524	-0.146933	0.0345989	0.411724		-0.0118912	-0.0554729	-0.126791	0.317529
	0.0922102	-0.0808561	0.055835	0.37416		-0.0255733	-0.0763962	-0.12588	0.330306
	0.125403	-0.0399582	0.0674724	0.340927		-0.0258876	-0.0724334	-0.09187	0.300181
	0.159224	-0.0334051	0.040357	0.337762		-0.0237328	-0.0778295	-0.0540449	0.2576
	0.180367	-0.0462735	-0.00396734	0.353886		-0.0314517	-0.0980273	-0.0588133	0.238952
	0.195776	-0.0730639	-0.00821248	0.356916		-0.0362899	-0.100882	-0.106364	0.242738
	0.210921	-0.110054	0.0484863	0.3337		-0.0320078	-0.0690471	-0.149864	0.244872
	0.21098	-0.141792	0.12174	0.298066		-0.0263116	-0.0151458	-0.154106	0.233851
	0.186593	-0.17041	0.159397	0.272302		-0.0194438	0.0316372	-0.130939	0.214687
	0.147434	-0.203512	0.150372	0.27096		-0.0135594	0.0364499	-0.108473	0.204085
	0.109717	-0.220053	0.125522	0.278448		-0.0260534	-0.0120295	-0.104132	0.212116
	0.0910519	-0.204923	0.128707	0.272864		-0.053216	-0.0651441	-0.106557	0.219943
	0.102958	-0.184389	0.167332	0.258235		-0.0723982	-0.0696452	-0.083031	0.20029
	0.132548	-0.17654	0.193377	0.262855		-0.0754581	-0.0397991	-0.0284467	0.161906
	0.149106	-0.160503	0.169564	0.297597		-0.0731844	-0.0169016	0.00766307	0.145555
	0.142376	-0.122866	0.124322	0.347946		-0.0718896	-0.0121753	-0.0143027	0.16545
	0.130174	-0.0787852	0.110519	0.378459		-0.070163	-0.0176781	-0.0692088	0.196597
	0.127537	-0.0419001	0.141461	0.357226		-0.067288	-0.0211219	-0.104233	0.21902
	0.134153	-0.0224963	0.185932	0.302776		-0.0562073	-0.0049124	-0.0958106	0.229255
	0.147024	-0.0306257	0.207476	0.268272		-0.0368488	0.0200974	-0.0553461	0.226888
	0.160272	-0.0469815	0.196176	0.277046		-0.0229135	0.0175466	-0.0187903	0.229024
	0.165444	-0.0423208	0.187838	0.30868		-0.0260068	-0.0123433	-0.0154866	0.249765
	0.166909	-0.0304004	0.220523	0.338512		-0.0437643	-0.032176	-0.0364413	0.257108
	0.168457	-0.034658	0.281403	0.356579		-0.0620466	-0.0247206	-0.046753	0.222577
	0.15879	-0.0453244	0.319348	0.371599		-0.0722849	-0.0134919	-0.0356389	0.176763
	0.129117	-0.0497583	0.319617	0.403724		-0.066135	-0.0241051	-0.024834	0.163425
	0.090277	-0.0546361	0.312406	0.446463		-0.0422154	-0.0559506	-0.0324666	0.186047
	0.0573301	-0.0617658	0.324124	0.459785		-0.0175658	-0.0895952	-0.0527942	0.227942
	0.0364131	-0.0675655	0.343785	0.427495		-0.00940931	-0.0985936	-0.0730135	0.2638
[truncated: 5,501 more rows]
