# Supplementary material for: Stimulation of VTA dopamine inputs to LH upregulates orexin neuronal activity in a DRD2-dependent manner
Source: eLife. 2024 Apr 3;12:RP90158. doi: 10.7554/eLife.90158 (PMC10990487; doi:10.7554/eLife.90158)
Supplement: Figure 5—source data 1. [file elife-90158-fig5-data1.xlsx]

## Sheet: panel_C
	-0.0784719	0.0407821	-0.00260421	0.0220418				0.0441883	0.157417	0.13968	0.183406
	-0.0872421	0.0351916	0.00631875	-0.036784				0.0444101	0.106389	0.0710758	0.268472
	-0.0866915	-0.0211107	0.109945	-0.0065144				0.0280741	0.0117536	0.0193635	0.333325
	-0.107618	-0.0171988	0.217462	0.0301641				-0.00778283	0.00515091	0.0443697	0.385225
	-0.129666	0.0870284	0.262607	0.0391037				-0.0460166	0.0384328	0.089486	0.373618
	-0.130011	0.165426	0.26849	0.0448961				-0.0738756	0.0422183	0.0725289	0.359526
	-0.108275	0.15695	0.25377	0.0218431				-0.098013	0.117476	0.0509724	0.428274
	-0.0575265	0.12861	0.216569	-0.0346276				-0.109144	0.255245	0.113302	0.53071
	0.0124416	0.0681028	0.185828	-0.0508917				-0.0934918	0.281751	0.186217	0.558168
	0.0471242	-0.0180706	0.171882	-0.0240716				-0.0644034	0.207358	0.186901	0.530664
	0.0176768	-0.00810467	0.158598	0.00919324				-0.0525656	0.160012	0.142952	0.472525
	-0.0304516	0.0832188	0.163793	0.0559968				-0.052838	0.115179	0.0732859	0.38398
	-0.0613548	0.128869	0.232905	0.117437				-0.0481676	0.0543156	-0.0209834	0.345512
	-0.0758768	0.134567	0.314458	0.136462				-0.0389541	0.0925822	-0.0791857	0.425391
	-0.0649943	0.178553	0.344285	0.105991				-0.0247633	0.190335	-0.0503993	0.510555
	-0.026222	0.198884	0.305497	0.0990052				-0.00727321	0.189355	0.0133386	0.490461
	0.00541497	0.151266	0.227181	0.152553				0.00261992	0.134267	0.075416	0.394312
	0.0026821	0.116931	0.15778	0.24241				-0.00150899	0.136604	0.171696	0.268682
	-0.0048968	0.105724	0.168693	0.351663				0.000809771	0.121894	0.263741	0.130148
	0.00507287	0.0467425	0.275385	0.455431				0.0176431	0.0532383	0.274178	0.0646941
	0.0185895	-0.0156353	0.37819	0.488113				0.0371865	0.0411094	0.252954	0.110975
	0.0236361	0.00381159	0.405281	0.421932				0.0552549	0.0636844	0.288487	0.161147
	0.0296878	0.0170815	0.39198	0.320345				0.0769947	0.0151836	0.324768	0.129567
	0.0255542	-0.0471516	0.38453	0.231978				0.100635	-0.0253079	0.319856	0.0833776
	-0.00014325	-0.105696	0.362236	0.175391				0.110663	0.0247729	0.318489	0.0552335
	-0.0159228	-0.14553	0.294863	0.173312				0.107293	0.0497153	0.293179	0.00249274
	-0.00939894	-0.220527	0.182434	0.197694				0.0990696	0.00990066	0.201881	-0.0447943
	-0.00710477	-0.261361	0.0537403	0.18496				0.0866441	0.0373711	0.122284	-0.0452934
	-0.00705577	-0.202822	-0.0165847	0.138213				0.0749413	0.117391	0.132766	-0.0548347
	0.0139482	-0.157948	0.0139054	0.118516				0.082981	0.148779	0.16218	-0.067429
	0.0319556	-0.167948	0.0849091	0.125791				0.102766	0.189601	0.142411	0.0193784
	0.0291702	-0.145503	0.128548	0.125172				0.106602	0.285917	0.0905428	0.167516
	0.038454	-0.107543	0.155715	0.0978732				0.100566	0.321255	0.00253974	0.283324
	0.0545617	-0.128852	0.204312	0.0456206				0.1017	0.284427	-0.13115	0.399411
	0.0406709	-0.146192	0.255732	-0.0196279				0.10812	0.289995	-0.215871	0.501215
	0.0197697	-0.119541	0.270629	-0.0471396				0.118469	0.290536	-0.209693	0.466498
	0.0294669	-0.136763	0.217119	0.0181619				0.135359	0.207436	-0.215568	0.326886
	0.0437154	-0.181722	0.1173	0.148443				0.129943	0.144223	-0.261672	0.202122
	0.0343478	-0.150889	0.036044	0.246814				0.085113	0.166842	-0.25257	0.129167
	0.0181903	-0.0786014	0.0499353	0.272566				0.0380474	0.161394	-0.19736	0.0728179
	-0.0014641	-0.076863	0.135298	0.238877				0.0195141	0.130324	-0.159366	0.0449891
	-0.0289622	-0.102015	0.190937	0.154811				0.0145502	0.181029	-0.0875461	0.0369426
	-0.0363245	-0.0936863	0.151367	0.0655326				0.00845243	0.247126	0.0171308	0.0155396
	-0.0101234	-0.112265	0.0639914	0.0518489				0.014407	0.232025	0.0431526	0.0217623
	0.00893327	-0.144472	-0.0107442	0.0934261				0.0231331	0.225067	0.00558224	0.116451
	0.0139862	-0.108113	-0.0568223	0.0958853				0.0199503	0.27119	0.00810611	0.212135
	0.0356899	-0.0516375	-0.0715182	0.0385475				0.0234857	0.246355	0.0215807	0.184794
	0.061188	-0.0489934	-0.0789831	-0.0324922				0.0450045	0.154537	-0.0115623	0.0767061
	0.060267	-0.0220577	-0.107271	-0.0957229				0.0571977	0.110007	-0.0400841	-0.0257701
	0.0504975	0.0362989	-0.136696	-0.129088				0.0539739	0.0726768	-0.0615555	-0.118714
	0.0461307	-0.00466648	-0.114947	-0.101812				0.0579429	-0.00976102	-0.126839	-0.152734
	0.0271732	-0.118428	-0.0532926	-0.0378719				0.0558974	-0.049288	-0.181456	-0.113737
	0.0073149	-0.175128	-0.00669588	0.0107907				0.0452479	-0.0420282	-0.166405	-0.113977
	0.0154269	-0.18506	-0.00105754	0.0387766				0.0519299	-0.121337	-0.160668	-0.182146
	0.0257603	-0.202888	-0.0287061	0.0453681				0.0730088	-0.245383	-0.200857	-0.175957
	0.00365594	-0.172596	-0.0855495	-0.0144791				0.0778455	-0.271865	-0.171587	-0.0621382
	-0.0303462	-0.115762	-0.127129	-0.117188				0.0734838	-0.236252	-0.0692054	0.0409222
	-0.0546559	-0.128866	-0.148803	-0.182844				0.0776944	-0.212195	-0.0294286	0.0880555
	-0.0762667	-0.179325	-0.154223	-0.20842				0.0720679	-0.14603	-0.0782685	0.0815462
	-0.0872129	-0.174495	-0.15095	-0.245714				0.055102	-0.0694207	-0.120328	0.0271416
	-0.0792782	-0.161413	-0.107658	-0.25806				0.0388563	-0.108955	-0.139576	-0.0232544
	-0.0777852	-0.19732	-0.022701	-0.20377				0.0180354	-0.186747	-0.119782	0.0138957
	-0.0974148	-0.204991	0.046984	-0.115839				-0.0154927	-0.170788	-0.0238796	0.0869752
	-0.106779	-0.189257	0.0460125	-0.0222256				-0.0436731	-0.147972	0.0397437	0.103728
	-0.0966502	-0.230873	-0.00839635	0.0748177				-0.0564863	-0.204039	-0.0238471	0.0750644
	-0.0947002	-0.278156	-0.110975	0.117569				-0.0726756	-0.240934	-0.118421	0.0231783
	-0.0915319	-0.24612	-0.224487	0.0916488				-0.0881649	-0.243259	-0.143306	-0.10701
	-0.0635974	-0.223169	-0.278708	0.0872196				-0.079485	-0.301097	-0.144954	-0.288944
	-0.0346988	-0.262499	-0.256391	0.138905				-0.0425345	-0.354108	-0.156729	-0.405261
	-0.0408614	-0.255159	-0.217358	0.186456				-0.00207191	-0.324279	-0.145161	-0.427468
	-0.0674768	-0.189541	-0.195095	0.211219				0.0360625	-0.315926	-0.130152	-0.414833
	-0.0930268	-0.143241	-0.183708	0.230668				0.0683624	-0.354065	-0.12566	-0.354335
	-0.104733	-0.0952487	-0.197981	0.227335				0.0799655	-0.299725	-0.079862	-0.238339
	-0.0740736	-0.0163523	-0.216636	0.181846				0.0834697	-0.171017	0.00310568	-0.12731
	-0.0401648	0.00457256	-0.196084	0.11116				0.0905711	-0.108282	0.0117521	-0.0433764
	0.0487365	-0.035918	-0.142514	0.00439821				0.0915283	-0.0764791	-0.072579	0.048639
	0.105375	-0.00774354	-0.10684	-0.122409				0.0779312	-0.0139966	-0.132659	0.0973138
	0.121044	0.0762706	-0.104299	-0.175367				0.0647527	-0.001452	-0.131615	0.0347635
	0.100543	0.119192	-0.119956	-0.106818				0.0489504	-0.0364628	-0.111479	-0.0797214
	0.0524345	0.137589	-0.174935	0.0195333				0.0141544	0.00930583	-0.0718272	-0.16896
	0.0141367	0.168054	-0.263101	0.122193				-0.030549	0.0855367	-0.0265817	-0.242909
	0.0120777	0.126881	-0.314189	0.173982				-0.0660348	0.0585647	-0.0525562	-0.286735
	0.0125239	0.0281331	-0.287266	0.12659				-0.0862328	-0.000494419	-0.117432	-0.240116
	-0.0107474	0.0119012	-0.189288	-0.0176164				-0.095278	-0.00797455	-0.128861	-0.14718
	-0.0167694	0.0720191	-0.0463965	-0.149048				-0.0878822	-0.033396	-0.112225	-0.119852
	0.0116809	0.108765	0.076745	-0.195502				-0.0693542	-0.0562138	-0.131958	-0.18584
	0.04281	0.153497	0.092661	-0.217271				-0.0562824	0.0260027	-0.156319	-0.273773
	0.0692557	0.238293	0.0215922	-0.268026				-0.0518508	0.105549	-0.154096	-0.326739
	0.089045	0.255031	-0.051361	-0.327107				-0.0448243	0.0569802	-0.160345	-0.247753
	0.0693366	0.205608	-0.0854163	-0.356185				-0.0450738	-0.0127941	-0.148717	-0.02872
	0.0183697	0.188616	-0.105052	-0.340342				-0.065024	-0.0206406	-0.0708021	0.13906
	-0.00312734	0.171434	-0.120493	-0.2839				-0.0848728	-0.0633645	0.0207599	0.0925629
	0.00642844	0.101312	-0.148142	-0.254844				-0.0960037	-0.130519	0.0520559	-0.0638086
	0.012357	0.0701504	-0.186515	-0.310123				-0.104814	-0.11657	0.0697961	-0.186237
	0.0186546	0.109865	-0.188328	-0.393885				-0.104658	-0.0885826	0.120167	-0.259475
	0.0313289	0.108052	-0.122097	-0.393766				-0.0880046	-0.116345	0.145471	-0.287987
	0.0254112	0.0714562	-0.025912	-0.306593				-0.0729716	-0.0977014	0.144392	-0.275694
	0.00795129	0.0924354	0.0367821	-0.210737				-0.0687316	-0.00824489	0.174979	-0.284594
	0.0064046	0.134349	0.0522267	-0.149031				-0.0580413	0.0346135	0.183064	-0.312701
	0.000169397	0.134785	0.0328038	-0.132642				-0.0368984	0.048008	0.108936	-0.26895
	-0.0309929	0.153928	-0.00804792	-0.160717				-0.0176488	0.113841	0.0433613	-0.157299
	-0.0563171	0.193736	-0.043456	-0.178838				-0.00306533	0.118255	0.0294688	-0.117852
	-0.060825	0.145645	-0.0451535	-0.131139				0.0193764	-0.00652558	-0.0126127	-0.18394
	-0.074111	0.0525537	-0.0378385	-0.0487387				0.0387438	-0.115046	-0.0524491	-0.27293
	-0.0961258	0.0382577	-0.0495481	0.0101934				0.041138	-0.132739	-0.0272998	-0.350595
	-0.0948811	0.0772488	-0.0525084	0.0514485				0.0369545	-0.142257	0.0125406	-0.401743
	-0.0748877	0.093731	-0.0252795	0.0996302				0.0316572	-0.112852	0.0241329	-0.369547
	-0.053449	0.134437	0.00233783	0.137149				0.01135	0.00484991	0.0605842	-0.286301
	-0.0252258	0.181703	0.0134714	0.161444				-0.0124937	0.068676	0.0932565	-0.264575
	-0.00564087	0.134711	0.012228	0.176764				-0.0121704	0.0142556	0.0502454	-0.265624
	-0.0207859	0.0510954	-0.000279802	0.16524				-0.00785134	-0.0289613	-0.00794973	-0.224581
	-0.0420368	0.0273011	-0.0282272	0.119402				-0.0142257	-0.0345674	0.0137413	-0.197374
	-0.0302184	0.0104694	-0.0669898	0.0852531				-0.0182148	-0.101247	0.0529636	-0.187118
	-0.0033761	-0.0360352	-0.133351	0.0672606				-0.0216846	-0.165083	0.0378855	-0.0749659
	-0.0214927	-0.00980907	-0.214385	0.0199632				-0.0306698	-0.131774	0.0270576	0.0945115
	-0.00253623	0.0803914	-0.260664	-0.0603214				-0.0276042	-0.0857786	0.0226153	0.190122
	0.00241922	0.114084	-0.213033	-0.122549				-0.00325609	-0.0690049	-0.0216423	0.197073
	-0.0229224	0.0995392	-0.100336	-0.152124				0.0185321	0.00635766	-0.0511253	0.130606
	-0.047486	0.12015	-0.00187503	-0.168191				0.0325264	0.0957094	-0.0333497	-0.0298641
	-0.0343837	0.133928	0.032689	-0.160008				0.0397182	0.079095	-0.053591	-0.226321
	0.00724718	0.112952	0.0102439	-0.138982				0.0317747	0.0315057	-0.11392	-0.371242
	0.0441939	0.159061	-0.0314966	-0.150009				0.00878111	0.0441773	-0.109289	-0.449186
	0.0660835	0.24528	-0.0375625	-0.206529				-0.00940188	0.0177283	-0.071997	-0.467404
	0.0641292	0.246285	0.0251238	-0.266403				-0.00986121	-0.0652655	-0.0784299	-0.367026
	0.029199	0.186951	0.0936518	-0.333812				-0.00885934	-0.0767816	-0.0814172	-0.193157
	-0.00984519	0.134091	0.116515	-0.395392				-0.00823576	-0.0439615	-0.0470516	-0.0912202
	-0.0229164	0.0367704	0.12109	-0.381923				0.00804478	-0.0811179	-0.0368683	-0.102457
	-0.023041	-0.07821	0.121686	-0.300488				0.0411129	-0.114095	-0.0612352	-0.134223
	-0.0268863	-0.0732589	0.103682	-0.225839				0.0611725	-0.0847396	-0.0692128	-0.163839
	-0.0156433	0.00420008	0.0818197	-0.185726				0.0597353	-0.0911787	-0.0949205	-0.208628
	0.01505	0.048886	0.0906282	-0.173236				0.043407	-0.126804	-0.154481	-0.195254
	0.0444573	0.0987144	0.116247	-0.167461				0.0106976	-0.0773845	-0.169969	-0.104481
	0.0790069	0.184766	0.138005	-0.129156				-0.0167114	0.00585732	-0.0987436	-0.0213217
	0.127535	0.191862	0.158315	-0.0287084				-0.0217768	0.0264889	-0.0227487	0.0317523
	0.15548	0.105763	0.159844	0.0521193				-0.0192581	0.0596652	0.0101405	0.0560968
	0.138532	0.0450073	0.142895	0.0193153				-0.0239331	0.129386	0.0313216	-0.0184815
	0.108141	0.000747681	0.130848	-0.0948901				-0.024184	0.114758	0.0239543	-0.176209
	0.0803895	-0.0687466	0.141224	-0.176727				-0.0280161	0.0248634	-0.0145437	-0.244368
	0.0432322	-0.0842594	0.117807	-0.160762				-0.0627805	-0.00627332	0.0054802	-0.183652
	0.0200257	-0.0159811	0.0247873	-0.0460705				-0.120769	-0.00102717	0.100939	-0.0613756
	0.0345756	0.007614	-0.122263	0.109657				-0.168316	-0.0284774	0.153408	0.0691034
	0.0556583	-0.0371781	-0.299106	0.193061				-0.184254	-0.0144198	0.138582	0.183447
	0.0561025	-0.0448575	-0.462232	0.133021				-0.166797	0.0469823	0.137755	0.25211
	0.061366	-0.0355611	-0.529331	0.0266471				-0.115427	0.0209013	0.137699	0.26109
	0.068439	-0.0623263	-0.479881	0.0144635				-0.058261	-0.0742785	0.115329	0.275826
	0.0576059	-0.0518078	-0.382262	0.10927				-0.0413458	-0.106087	0.126154	0.294517
	0.058999	0.00162111	-0.293913	0.232233				-0.0662679	-0.119599	0.166315	0.245401
	0.0898629	-0.0287348	-0.229804	0.330251				-0.0921417	-0.184301	0.167257	0.166995
	0.109532	-0.117633	-0.209209	0.374711				-0.103605	-0.207266	0.152045	0.170414
	0.112232	-0.142354	-0.222499	0.398147				-0.111494	-0.168572	0.17099	0.209553
	0.131902	-0.132416	-0.21727	0.482751				-0.109206	-0.171192	0.166535	0.209355
	0.145961	-0.134716	-0.176922	0.613111				-0.106105	-0.182815	0.0975556	0.187632
	0.120958	-0.0996585	-0.143312	0.676423				-0.110608	-0.11219	0.0402341	0.13039
	0.086023	-0.0562253	-0.14941	0.655743				-0.100269	-0.052573	0.0321071	-0.00167309
	0.0633157	-0.111477	-0.191679	0.631163				-0.0639643	-0.0749221	0.0168189	-0.126934
	0.0353789	-0.197148	-0.255905	0.602622				-0.0347684	-0.0745466	0.00831498	-0.182783
	0.011587	-0.205792	-0.313471	0.516067				-0.0306635	-0.0279953	0.0252078	-0.217525
	0.0115374	-0.192914	-0.318986	0.378364				-0.0362322	-0.0507557	-0.0271398	-0.239106
	0.00521079	-0.210936	-0.272381	0.237061				-0.045832	-0.118931	-0.166307	-0.194365
	-0.0201171	-0.172909	-0.21753	0.135905				-0.0566261	-0.127407	-0.230728	-0.113546
	-0.0236206	-0.0769421	-0.167656	0.136789				-0.0534014	-0.138056	-0.178315	-0.0883206
	-0.00119423	-0.0482813	-0.123009	0.233044				-0.0295863	-0.188821	-0.119391	-0.11146
	0.00241107	-0.0800246	-0.107298	0.297281				-0.00930079	-0.1689	-0.0999154	-0.142374
	-0.0154738	-0.0969751	-0.146568	0.240427				-0.000344137	-0.0821686	-0.128226	-0.196884
	-0.0272658	-0.133468	-0.190213	0.166583				0.015438	-0.052194	-0.239717	-0.286699
	-0.0399593	-0.197705	-0.212708	0.204425				0.0316327	-0.0227131	-0.356876	-0.354149
	-0.0508203	-0.188904	-0.226148	0.346162				0.0282577	0.0939207	-0.342292	-0.392964
	-0.032631	-0.130386	-0.236695	0.506974				0.017612	0.182262	-0.22915	-0.406321
	-0.0017668	-0.11923	-0.233717	0.603652				0.0228314	0.179002	-0.141328	-0.290736
	-0.000175477	-0.107214	-0.239719	0.547024				0.0261667	0.18109	-0.0942191	-0.0108961
	-0.0183722	-0.0558042	-0.252694	0.413796				0.0206396	0.175476	-0.0456142	0.244706
	-0.0370908	-0.0620536	-0.234871	0.35623				0.0203689	0.0860336	-0.0180034	0.343466
	-0.0674757	-0.1427	-0.193434	0.412676				0.0160782	0.0117266	-0.0265238	0.312132
	-0.106866	-0.169821	-0.177827	0.475479				-0.0030406	0.0322264	-0.0310175	0.197497
	-0.132324	-0.141847	-0.209741	0.496225				-0.0313135	0.0313494	-0.0680037	0.0333776
	-0.1516	-0.139456	-0.273152	0.510504				-0.0677963	-0.0120765	-0.155541	-0.0829555
	-0.175341	-0.118926	-0.351841	0.532977				-0.118097	0.0272269	-0.174326	-0.150688
	-0.175479	-0.0359254	-0.414617	0.563264				-0.156533	0.122297	-0.0917633	-0.217066
	-0.143116	0.037745	-0.415475	0.609756				-0.16659	0.147827	-0.0561866	-0.260037
	-0.118406	0.0649651	-0.374236	0.632301				-0.160187	0.158221	-0.134392	-0.25234
	-0.127916	0.124003	-0.339868	0.572586				-0.150109	0.202905	-0.23171	-0.271015
	-0.153905	0.170991	-0.308909	0.469392				-0.130958	0.171161	-0.321193	-0.370344
	-0.183247	0.119189	-0.247149	0.387109				-0.0975415	0.0814699	-0.392426	-0.461581
	-0.219534	0.0435366	-0.177038	0.315129				-0.0757632	0.0736097	-0.393913	-0.476964
	-0.249624	0.0212015	-0.129975	0.240696				-0.0514228	0.0763572	-0.358511	-0.459935
	-0.268998	-0.00366569	-0.103829	0.196821				-0.0425254	-0.0282661	-0.381729	-0.438655
	-0.29685	-0.0308197	-0.124022	0.171216				-0.0484803	-0.126717	-0.434761	-0.38811
	-0.33028	0.0185772	-0.184175	0.155076				-0.0744726	-0.145885	-0.417363	-0.353964
	-0.331454	0.0877533	-0.232344	0.195242				-0.10485	-0.170753	-0.347365	-0.372626
	-0.295838	0.108621	-0.230406	0.279104				-0.126999	-0.18527	-0.286195	-0.364562
	-0.257237	0.161124	-0.22224	0.313286				-0.153657	-0.113624	-0.229724	-0.300692
	-0.224704	0.278972	-0.230228	0.291571				-0.177497	-0.0604646	-0.194981	-0.272084
	-0.194029	0.340062	-0.23094	0.294681				-0.187821	-0.109901	-0.243274	-0.271274
	-0.174288	0.310738	-0.213301	0.361147				-0.192898	-0.141706	-0.333352	-0.250943
	-0.158857	0.288192	-0.183842	0.47071				-0.198685	-0.108821	-0.361782	-0.244046
	-0.119099	0.269957	-0.15013	0.585731				-0.191075	-0.112704	-0.362711	-0.258037
	-0.0778734	0.247966	-0.128435	0.629531				-0.169458	-0.13875	-0.383249	-0.189995
	-0.0756512	0.313928	-0.1314	0.556955				-0.154235	-0.113263	-0.363173	-0.0586421
	-0.0867848	0.45594	-0.155348	0.427536				-0.150323	-0.138294	-0.296862	0.0173923
	-0.0803066	0.503199	-0.182263	0.355979				-0.153861	-0.261756	-0.279486	0.0115925
	-0.0713797	0.43884	-0.215241	0.357783				-0.167153	-0.339405	-0.302106	0.0012917
	-0.0834688	0.390822	-0.240455	0.37114				-0.187162	-0.32527	-0.294229	0.0124417
	-0.0961882	0.340178	-0.205431	0.378241				-0.184375	-0.337276	-0.292245	0.044726
	-0.117838	0.247798	-0.0955756	0.391246				-0.153974	-0.371467	-0.298098	0.105534
	-0.157198	0.190298	0.0165482	0.400042				-0.128679	-0.359829	-0.229262	0.136568
	-0.174836	0.174512	0.0809851	0.376868				-0.123996	-0.384352	-0.111269	0.0400674
	-0.164574	0.111169	0.1039	0.410544				-0.132493	-0.46134	-0.0627342	-0.119031
	-0.17302	0.0696059	0.0915176	0.444023				-0.160404	-0.461376	-0.0699875	-0.212007
	-0.20064	0.13885	0.0543655	0.431644				-0.198544	-0.405215	-0.0527932	-0.230445
	-0.209927	0.220951	0.0190311	0.421575				-0.206424	-0.419734	-0.0267804	-0.174028
	-0.214459	0.244909	-0.00907699	0.448497				-0.18989	-0.454131	-0.0176019	-0.015925
	-0.235332	0.274002	-0.0449698	0.450853				-0.190261	-0.410895	0.0220857	0.126923
	-0.251101	0.291875	-0.0687096	0.37998				-0.213332	-0.36343	0.0562752	0.115752
	-0.257715	0.214361	-0.0622458	0.231229				-0.245778	-0.35318	-0.00468885	0.0275914
	-0.275399	0.12783	-0.0413372	0.0236305				-0.289485	-0.304235	-0.0970314	-0.0226061
	-0.283221	0.139165	-0.035915	-0.163723				-0.32869	-0.246846	-0.1244	-0.0264826
	-0.254817	0.187305	-0.0304866	-0.219003				-0.338664	-0.27841	-0.143372	0.0122455
	-0.225748	0.217095	-0.0267664	-0.156885				-0.336756	-0.331232	-0.182601	0.0982596
	-0.216918	0.286742	-0.0496127	-0.0850729				-0.34511	-0.326179	-0.174012	0.158306
	-0.201175	0.369294	-0.0943073	-0.0339065				-0.35038	-0.363044	-0.158176	0.142695
	-0.180414	0.371353	-0.12894	0.0603718				-0.336924	-0.460118	-0.199842	0.0837125
	-0.183146	0.358958	-0.158651	0.20291				-0.326416	-0.488317	-0.214498	0.00519855
	-0.192005	0.381478	-0.183765	0.232251				-0.326227	-0.460864	-0.173997	-0.131285
	-0.187389	0.33554	-0.162469	0.164309				-0.317984	-0.47638	-0.182345	-0.254077
	-0.19283	0.208848	-0.0881839	0.0402668				-0.308798	-0.467256	-0.255275	-0.245384
	-0.205464	0.146386	-0.00222801	-0.0715092				-0.309796	-0.383221	-0.304696	-0.124699
	-0.186294	0.173497	0.0611787	-0.0655742				-0.310558	-0.349341	-0.332657	-0.0412107
	-0.140905	0.215614	0.0733426	0.0714722				-0.309932	-0.379197	-0.370144	-0.00446296
	-0.105307	0.311178	0.0185821	0.206906				-0.335478	-0.367976	-0.368068	0.0148522
	-0.0823105	0.462307	-0.059414	0.25977				-0.367415	-0.350415	-0.330285	-0.00475772
	-0.0756384	0.559801	-0.0849055	0.300151				-0.361938	-0.414463	-0.32406	-0.00226323
	-0.100521	0.578191	-0.0668377	0.370045				-0.321597	-0.483893	-0.347825	0.0957065
	-0.132251	0.600314	-0.0551626	0.414914				-0.261725	-0.505244	-0.335487	0.191217
	-0.128513	0.573638	-0.0548257	0.421627				-0.19017	-0.567291	-0.330188	0.203655
	-0.0997646	0.432415	-0.0286565	0.391307				-0.129149	-0.652931	-0.370261	0.214606
	-0.0846814	0.296212	0.0350393	0.303544				-0.105298	-0.654117	-0.363739	0.234338
	-0.079023	0.249978	0.119683	0.191461				-0.110803	-0.626062	-0.283369	0.19619
	-0.0706921	0.236277	0.211733	0.127999				-0.138112	-0.665789	-0.214238	0.125065
	-0.0690077	0.244731	0.242916	0.0778037				-0.187411	-0.676372	-0.155793	0.0616792
	-0.0687247	0.330589	0.178791	-0.0175492				-0.238912	-0.608717	-0.0538665	0.00548681
	-0.0576404	0.393417	0.0810691	-0.103292				-0.267591	-0.588416	0.0313308	-0.00677221
	-0.0555714	0.33218	0.03517	-0.098861				-0.270147	-0.623396	0.0575229	0.0848542
	-0.0758121	0.24719	0.028317	-0.031127				-0.266707	-0.619459	0.0811449	0.260668
	-0.0814049	0.203808	0.0255698	0.0327588				-0.262002	-0.647946	0.072891	0.399467
	-0.0504237	0.135286	0.00832227	0.0556253				-0.259253	-0.760539	-0.0412241	0.471823
	-0.0141422	0.0657028	-0.0542221	0.0145188				-0.269571	-0.818807	-0.214271	0.529673
	-0.00398836	0.0850622	-0.147706	-0.0602391				-0.291612	-0.789652	-0.331124	0.559472
	-0.0166039	0.127584	-0.201702	-0.0623012				-0.305231	-0.794739	-0.371817	0.522914
	-0.0503862	0.13046	-0.184002	0.0138665				-0.302256	-0.809092	-0.346079	0.492537
	-0.0922776	0.156651	-0.123381	0.0828576				-0.300415	-0.750659	-0.242507	0.471826
	-0.0988443	0.195156	-0.0413368	0.118714				-0.299927	-0.711355	-0.115889	0.401723
	-0.0652866	0.154083	0.0259926	0.155394				-0.303282	-0.754637	-0.0640412	0.318947
	-0.0411918	0.074881	0.0188435	0.170324				-0.322109	-0.770621	-0.0838972	0.273093
	-0.0422972	0.0592605	-0.04627	0.135267				-0.351969	-0.741971	-0.0733681	0.183033
	-0.0299113	0.0446057	-0.0956398	0.0644241				-0.377361	-0.760125	-0.0844988	0.0636191
	-0.00480523	-0.0076284	-0.0736193	-0.0589265				-0.404387	-0.768508	-0.145659	0.0424442
	-0.000399657	-0.00846442	0.00908179	-0.242354				-0.44278	-0.682728	-0.196759	0.143543
	-0.0068176	0.0554972	0.134904	-0.417873				-0.47963	-0.622856	-0.23342	0.27307
	-0.0115973	0.0869215	0.269916	-0.495242				-0.498013	-0.650662	-0.311291	0.379384
	-0.025153	0.113931	0.336794	-0.497144				-0.493555	-0.636389	-0.380065	0.444336
	-0.0309178	0.199749	0.295429	-0.479494				-0.474951	-0.578133	-0.375482	0.435186
	-0.00964749	0.248367	0.185592	-0.461247				-0.452405	-0.587204	-0.367173	0.388339
	-0.00614277	0.221102	0.0795853	-0.426841				-0.446104	-0.613215	-0.393734	0.389935
	-0.052306	0.207291	0.0295636	-0.371232				-0.466219	-0.592424	-0.373748	0.40572
	-0.102053	0.19516	0.0716459	-0.262533				-0.486015	-0.629702	-0.300689	0.328004
	-0.122196	0.113462	0.164014	-0.0943006				-0.477587	-0.718655	-0.235241	0.222395
	-0.124456	0.0582509	0.22576	0.0537718				-0.453219	-0.709221	-0.170532	0.213704
	-0.10713	0.104025	0.235342	0.0972029				-0.435065	-0.625757	-0.102727	0.277446
	-0.0726202	0.142642	0.230822	0.0469713				-0.417976	-0.58623	-0.107156	0.365891
	-0.0638731	0.109436	0.220049	-0.0805945				-0.40724	-0.550028	-0.174661	0.478187
	-0.0841658	0.0706762	0.198443	-0.25245				-0.407855	-0.474221	-0.190652	0.459897
	-0.0893057	0.0377232	0.183326	-0.373401				-0.403623	-0.459253	-0.145904	0.353127
	-0.0842861	-0.036869	0.191439	-0.377488				-0.395356	-0.510935	-0.131676	0.2308
	-0.107745	-0.0890946	0.210295	-0.318746				-0.407677	-0.523346	-0.139524	0.167442
	-0.141372	-0.088465	0.230907	-0.242208				-0.433035	-0.532048	-0.14461	0.101529
	-0.144706	-0.132168	0.257448	-0.132706				-0.433471	-0.601165	-0.208942	0.030386
	-0.122801	-0.221102	0.278521	-0.00154841				-0.41019	-0.611479	-0.317652	-0.0388939
	-0.0898477	-0.22623	0.269052	0.0941305				-0.383101	-0.493372	-0.375984	-0.132801
	-0.0546371	-0.153654	0.240064	0.145645				-0.357056	-0.397902	-0.418276	-0.239254
	-0.056822	-0.123243	0.218061	0.181754				-0.332384	-0.370028	-0.500117	-0.253356
	-0.109699	-0.111974	0.199876	0.17591				-0.329983	-0.316832	-0.537023	-0.189063
	-0.151609	-0.105302	0.171346	0.0893575				-0.350469	-0.291503	-0.499897	-0.175576
	-0.137966	-0.184184	0.146221	-0.0615039				-0.372303	-0.357082	-0.483157	-0.244308
	-0.0998743	-0.303608	0.117662	-0.257326				-0.398826	-0.3833	-0.508097	-0.296036
	-0.0704302	-0.336413	0.0832619	-0.477978				-0.429993	-0.318688	-0.51889	-0.302477
	-0.0515305	-0.327209	0.0755644	-0.647288				-0.4453	-0.288461	-0.5481	-0.311102
	-0.0498913	-0.358809	0.109325	-0.659126				-0.439569	-0.278269	-0.597337	-0.318836
	-0.0663861	-0.352126	0.160323	-0.602994				-0.440483	-0.208813	-0.572732	-0.349866
	-0.0713598	-0.272691	0.19731	-0.538758				-0.448167	-0.165685	-0.470689	-0.443758
	-0.0589503	-0.209536	0.226964	-0.482821				-0.44619	-0.216227	-0.383328	-0.494294
	-0.0547167	-0.191975	0.228395	-0.374816				-0.451201	-0.266121	-0.325321	-0.416194
	-0.0522112	-0.172294	0.196946	-0.283061				-0.46858	-0.291997	-0.26579	-0.336459
	-0.0315148	-0.210246	0.174789	-0.207801				-0.479343	-0.37804	-0.261757	-0.347201
	-0.0150842	-0.348278	0.205851	-0.185251				-0.477577	-0.46369	-0.325509	-0.374403
	-0.0343599	-0.457664	0.268523	-0.29691				-0.477641	-0.440675	-0.35378	-0.376196
	-0.0625247	-0.480262	0.314586	-0.502751				-0.472232	-0.38897	-0.348859	-0.368956
	-0.0690489	-0.49289	0.325303	-0.661663				-0.457273	-0.38803	-0.384749	-0.31208
	-0.0626226	-0.489606	0.273491	-0.728433				-0.445712	-0.34254	-0.435652	-0.211541
	-0.044874	-0.412008	0.150927	-0.749003				-0.435569	-0.250774	-0.443989	-0.117261
	-0.00501466	-0.364128	0.0314292	-0.736726				-0.414711	-0.242041	-0.458947	-0.041607
	0.0297539	-0.4272	-0.00901241	-0.692963				-0.385521	-0.275352	-0.494762	0.0500247
	0.0285668	-0.486516	0.0393016	-0.633705				-0.367763	-0.255523	-0.492677	0.0943764
	0.0192445	-0.498136	0.161848	-0.544744				-0.351649	-0.270649	-0.475005	0.0415732
	0.0327325	-0.529728	0.331122	-0.41313				-0.324967	-0.361577	-0.486323	-0.0353419
	0.057938	-0.551411	0.44751	-0.3242				-0.297538	-0.397819	-0.48284	-0.0272268
	0.0822908	-0.500132	0.474716	-0.356663				-0.276197	-0.381197	-0.434075	0.0330424
	0.104532	-0.465993	0.480329	-0.465563				-0.25657	-0.413954	-0.418129	0.0700796
	0.0997586	-0.491221	0.524599	-0.57452				-0.253438	-0.433488	-0.4684	0.0953101
	0.0605504	-0.487923	0.583066	-0.633648				-0.287507	-0.358763	-0.518725	0.089306
	0.0373031	-0.457791	0.615507	-0.596818				-0.33704	-0.281255	-0.54716	0.0240938
	0.0497523	-0.477865	0.601494	-0.468549				-0.379615	-0.242506	-0.586615	0.00502254
	0.0650329	-0.502382	0.516266	-0.347537				-0.417736	-0.164005	-0.603709	0.0878747
	0.0762715	-0.467935	0.381656	-0.302326				-0.441965	-0.0982319	-0.553885	0.173777
	0.101779	-0.472147	0.263392	-0.309012				-0.435611	-0.138901	-0.473785	0.221022
	0.113525	-0.548672	0.200705	-0.347501				-0.407151	-0.197542	-0.371431	0.270322
	0.0831745	-0.586272	0.170982	-0.427349				-0.370674	-0.184778	-0.217569	0.302729
	0.0428459	-0.578499	0.178516	-0.508622				-0.323113	-0.192582	-0.106517	0.299117
	0.00466643	-0.59893	0.234339	-0.544739				-0.278449	-0.249722	-0.150307	0.300318
	-0.0456463	-0.58629	0.305523	-0.540614				-0.260433	-0.255453	-0.28572	0.273061
	-0.075999	-0.494041	0.364767	-0.520943				-0.267949	-0.241331	-0.400126	0.154558
	-0.0550929	-0.443427	0.41449	-0.467895				-0.278511	-0.278996	-0.49385	-0.0090773
	-0.0189202	-0.452561	0.421106	-0.413629				-0.2841	-0.261388	-0.548651	-0.102534
	0.00461262	-0.423968	0.368686	-0.405089				-0.280036	-0.138628	-0.524417	-0.116263
	0.0274047	-0.397162	0.318884	-0.413837				-0.250002	-0.0656491	-0.480593	-0.110898
	0.0333271	-0.45914	0.319178	-0.37646				-0.203634	-0.117233	-0.488063	-0.110715
	0.00605821	-0.547972	0.348837	-0.319433				-0.175064	-0.136692	-0.496719	-0.107738
	-0.0151398	-0.604477	0.393584	-0.285728				-0.172713	-0.145373	-0.468418	-0.15532
	-0.0127176	-0.672806	0.449073	-0.267428				-0.173694	-0.208753	-0.459236	-0.221084
	-0.0296808	-0.716001	0.490827	-0.284205				-0.18171	-0.25336	-0.475578	-0.241675
	-0.0707326	-0.661469	0.481823	-0.348772				-0.204013	-0.242251	-0.467454	-0.24039
	-0.0928888	-0.57976	0.422772	-0.384732				-0.225579	-0.274633	-0.454886	-0.247411
	-0.0980998	-0.577623	0.33226	-0.349381				-0.23641	-0.314747	-0.484332	-0.164809
	-0.112988	-0.591323	0.215009	-0.312597				-0.240181	-0.245506	-0.494054	0.0188161
	-0.125586	-0.570147	0.0874366	-0.342585				-0.22534	-0.148862	-0.456451	0.201665
	-0.125424	-0.585169	0.007369	-0.41681				-0.188086	-0.143003	-0.451612	0.341026
	-0.137119	-0.624845	-0.00398167	-0.499628				-0.166525	-0.144607	-0.489053	0.419013
	-0.160652	-0.603872	0.0270508	-0.571539				-0.181859	-0.092391	-0.507753	0.390279
	-0.173799	-0.567754	0.0837683	-0.593781				-0.211795	-0.0861658	-0.592753	0.294892
	-0.191043	-0.589527	0.131887	-0.564859				-0.227105	-0.10008	-0.752711	0.240708
	-0.227931	-0.592973	0.135048	-0.528888				-0.222273	-0.0414483	-0.873236	0.257096
	-0.258412	-0.563068	0.109061	-0.51602				-0.194843	-0.00643557	-0.895757	0.274817
	-0.272844	-0.596163	0.114198	-0.521167				-0.142687	-0.0532254	-0.883827	0.266945
	-0.290541	-0.670015	0.153635	-0.590649				-0.0897208	-0.0414723	-0.834679	0.285951
	-0.301077	-0.703675	0.204771	-0.739039				-0.0495904	0.0507227	-0.723858	0.332576
	-0.285762	-0.72916	0.253102	-0.852925				-0.0196716	0.0834078	-0.63509	0.388922
	-0.262165	-0.760527	0.278262	-0.831095				-0.00303491	0.0805392	-0.614647	0.464668
	-0.250352	-0.691763	0.274228	-0.724171				-0.0117372	0.122836	-0.57983	0.501681
	-0.237683	-0.54306	0.277821	-0.607737				-0.0328921	0.125685	-0.540821	0.418882
	-0.2241	-0.456165	0.316172	-0.518098				-0.0499225	0.0594862	-0.570756	0.317381
	-0.230734	-0.453923	0.349043	-0.476756				-0.079175	0.0492193	-0.640575	0.305568
	-0.254061	-0.452976	0.344675	-0.468635				-0.122464	0.0896877	-0.678689	0.341553
	-0.275168	-0.464439	0.33281	-0.416519				-0.16103	0.0605296	-0.717694	0.364552
	-0.295178	-0.514455	0.34093	-0.324508				-0.181996	0.0307361	-0.778759	0.402711
	-0.317176	-0.517615	0.350493	-0.29167				-0.190003	0.102034	-0.795688	0.396865
	-0.321052	-0.491032	0.329655	-0.363975				-0.182746	0.161589	-0.792437	0.335188
	-0.305668	-0.533936	0.293993	-0.486648				-0.172432	0.1331	-0.832574	0.293118
	-0.29491	-0.607418	0.252626	-0.607541				-0.185186	0.130387	-0.863287	0.297577
	-0.283382	-0.613514	0.228782	-0.692789				-0.216843	0.155177	-0.827618	0.277989
	-0.248019	-0.610721	0.243611	-0.708215				-0.233226	0.121775	-0.802262	0.23851
	-0.206241	-0.640907	0.266927	-0.692735				-0.212658	0.127388	-0.819184	0.258372
	-0.192271	-0.620688	0.248957	-0.696796				-0.172464	0.223216	-0.823205	0.350993
	-0.193196	-0.572441	0.201179	-0.672282				-0.12977	0.260003	-0.847174	0.444362
	-0.190338	-0.574653	0.175248	-0.542433				-0.0956154	0.202244	-0.944388	0.504547
	-0.183821	-0.574702	0.165247	-0.348054				-0.0841697	0.168691	-1.04686	0.534941
	-0.160785	-0.517151	0.164822	-0.201192				-0.0862878	0.133261	-1.07332	0.501629
	-0.117168	-0.498306	0.188442	-0.160772				-0.0787129	0.0500318	-1.05221	0.43004
	-0.0981486	-0.538562	0.222983	-0.230678				-0.0659956	0.0431762	-1.01849	0.420998
	-0.136635	-0.523533	0.237433	-0.371423				-0.0708218	0.154157	-0.972716	0.459612
	-0.18978	-0.458895	0.241566	-0.464398				-0.0792908	0.238403	-0.977344	0.467505
	-0.225358	-0.426771	0.249167	-0.45022				-0.0747468	0.258712	-1.05806	0.490096
	-0.251567	-0.392745	0.232832	-0.408646				-0.0694811	0.295832	-1.12003	0.54841
	-0.252466	-0.311519	0.177976	-0.360271				-0.071124	0.284534	-1.10936	0.582809
	-0.211631	-0.283023	0.104116	-0.336183				-0.0859254	0.155709	-1.11812	0.599738
	-0.169769	-0.323135	0.0389999	-0.374409				-0.120148	0.0322454	-1.1723	0.628916
	-0.154615	-0.32365	0.0122265	-0.386243				-0.167016	-0.00127895	-1.18888	0.583654
	-0.135126	-0.310543	0.0478531	-0.40042				-0.180426	-0.0246823	-1.16512	0.448359
	-0.120816	-0.354741	0.118412	-0.388321				-0.155956	-0.0271777	-1.14562	0.314962
	-0.147362	-0.380674	0.128696	-0.380071				-0.135493	0.0801887	-1.10475	0.257627
	-0.181392	-0.35259	0.0486534	-0.401115				-0.132315	0.193674	-1.05637	0.261307
	-0.171994	-0.388155	-0.0648942	-0.435701				-0.118886	0.219991	-1.08648	0.319474
	-0.137902	-0.47233	-0.155395	-0.493849				-0.09016	0.273812	-1.17147	0.408163
	-0.089496	-0.493514	-0.208183	-0.584965				-0.0583993	0.383145	-1.22724	0.476948
	-0.0269845	-0.495234	-0.203361	-0.653574				-0.0212615	0.39632	-1.2773	0.486931
	-0.00314861	-0.55362	-0.159309	-0.668486				0.0100895	0.300698	-1.3464	0.510673
	-0.0506633	-0.59468	-0.12781	-0.690286				0.0117858	0.195547	-1.36344	0.571356
	-0.116901	-0.581048	-0.130596	-0.746881				-0.00789149	0.0631469	-1.33294	0.556939
	-0.159091	-0.580355	-0.151089	-0.797675				-0.0232439	-0.0719017	-1.34673	0.494342
	-0.195889	-0.554789	-0.1771	-0.840154				-0.0443026	-0.0842962	-1.39615	0.416508
	-0.226031	-0.444289	-0.196342	-0.885539				-0.0736466	0.00648589	-1.39187	0.325493
	-0.224522	-0.337339	-0.187272	-0.883807				-0.0839628	0.0369388	-1.34788	0.216411
	-0.212267	-0.326145	-0.179061	-0.814513				-0.0763931	0.00647648	-1.30965	0.161815
	-0.212859	-0.325575	-0.217927	-0.738398				-0.073988	0.00381963	-1.24254	0.162648
	-0.208617	-0.305937	-0.293616	-0.706406				-0.0697067	-0.02884	-1.16458	0.171873
	-0.202039	-0.366561	-0.345894	-0.698413				-0.048348	-0.120944	-1.15352	0.237111
	-0.223372	-0.470315	-0.365514	-0.715255				-0.0349234	-0.157148	-1.16526	0.364482
	-0.25455	-0.514585	-0.37822	-0.75549				-0.0356867	-0.121593	-1.13082	0.431472
	-0.262778	-0.533289	-0.381404	-0.794878				-0.0373451	-0.148128	-1.10596	0.367052
	-0.262817	-0.564223	-0.374705	-0.840266				-0.0495499	-0.194539	-1.13909	0.217406
	-0.26727	-0.530754	-0.369937	-0.93914				-0.0832661	-0.167682	-1.16583	0.056065
	-0.252624	-0.462592	-0.349522	-1.03976				-0.118511	-0.16189	-1.18378	-0.0608021
	-0.227841	-0.456783	-0.291517	-1.03885				-0.137195	-0.224122	-1.21681	-0.0468153
	-0.223222	-0.464146	-0.236312	-0.942057				-0.156801	-0.241011	-1.19708	0.0853365
	-0.22441	-0.421429	-0.228895	-0.860779				-0.175597	-0.214252	-1.08495	0.202067
	-0.213693	-0.39901	-0.250488	-0.835487				-0.182516	-0.238229	-0.97528	0.20202
	-0.210158	-0.426977	-0.290351	-0.861443				-0.184817	-0.22124	-0.937273	0.171469
	-0.223879	-0.406075	-0.32597	-0.930204				-0.19461	-0.0953149	-0.937859	0.168894
	-0.236089	-0.357185	-0.313089	-0.973621				-0.20407	-0.00161801	-0.981242	0.196201
	-0.249156	-0.375721	-0.237548	-0.939306				-0.212459	0.00981258	-1.05983	0.296042
	-0.277557	-0.433102	-0.158184	-0.8854				-0.234812	0.0502703	-1.08485	0.458826
	-0.300875	-0.452755	-0.109653	-0.86177				-0.256746	0.0950045	-1.02003	0.56053
	-0.301026	-0.474973	-0.0879146	-0.813454				-0.255158	0.048539	-0.96909	0.586892
	-0.293419	-0.512204	-0.117377	-0.736077				-0.235678	0.00153048	-0.983234	0.627283
	-0.285292	-0.465887	-0.208979	-0.728242				-0.215302	0.0275573	-0.992072	0.700913
	-0.252279	-0.37814	-0.317787	-0.74975				-0.190724	0.0171796	-0.996157	0.778495
	-0.196551	-0.375623	-0.362067	-0.78707				-0.163267	-0.0442227	-1.02886	0.878602
	-0.152408	-0.428717	-0.367563	-0.811229				-0.148673	-0.0292621	-1.03272	0.947016
	-0.127443	-0.455264	-0.365534	-0.803768				-0.141942	0.0137147	-0.975274	0.901736
	-0.113623	-0.490495	-0.375787	-0.711958				-0.136702	-0.0316696	-0.917539	0.758058
	-0.11881	-0.512157	-0.42369	-0.593371				-0.132156	-0.0703207	-0.874989	0.604056
	-0.135994	-0.425904	-0.505245	-0.520032				-0.130749	-0.0402855	-0.812542	0.472699
	-0.131099	-0.309998	-0.566911	-0.478411				-0.126199	-0.0503685	-0.792567	0.345528
	-0.114595	-0.274894	-0.583038	-0.453166				-0.121607	-0.091076	-0.851944	0.273781
	-0.120618	-0.265922	-0.584158	-0.471542				-0.134466	-0.0476177	-0.932138	0.299388
	-0.129096	-0.225128	-0.575393	-0.53769				-0.164134	0.00390127	-0.905334	0.367839
	-0.106486	-0.218457	-0.550337	-0.60306				-0.196331	-0.0223441	-0.852199	0.422463
	-0.072987	-0.246547	-0.524305	-0.674777				-0.221892	-0.0167153	-0.801062	0.470096
	-0.055253	-0.240594	-0.496499	-0.757246				-0.239038	0.0385117	-0.737891	0.439107
	-0.034382	-0.261797	-0.44494	-0.803965				-0.23356	0.0193433	-0.718797	0.321853
	-0.0146501	-0.371466	-0.372472	-0.784867				-0.21147	-0.0381667	-0.775984	0.235158
	-0.0240702	-0.465548	-0.342646	-0.763388				-0.20092	-0.0106008	-0.812907	0.229837
	-0.0438853	-0.460473	-0.377137	-0.794884				-0.207315	0.0272062	-0.757511	0.214777
	-0.0519204	-0.450571	-0.441327	-0.869914				-0.211486	-0.00228884	-0.683228	0.200369
	-0.0721662	-0.459035	-0.497967	-0.974071				-0.212736	-0.0099987	-0.638124	0.239776
	-0.102241	-0.424791	-0.54347	-1.07034				-0.21924	0.00928593	-0.598305	0.257797
	-0.0967092	-0.407686	-0.586195	-1.0849				-0.221299	-0.0492673	-0.604966	0.193875
	-0.066437	-0.438567	-0.644641	-1.01752				-0.220244	-0.116183	-0.681731	0.118119
	-0.0451267	-0.397533	-0.72372	-0.962749				-0.224186	-0.0636009	-0.734129	0.0789896
	-0.0139893	-0.277715	-0.775092	-0.949152				-0.223987	0.00659655	-0.731751	0.0816098
	0.0280329	-0.24659	-0.761805	-0.918715				-0.212465	-0.00707593	-0.749116	0.159167
	0.0326748	-0.315726	-0.723551	-0.869257				-0.207192	-0.018354	-0.763159	0.333681
	0.000281605	-0.378014	-0.712726	-0.859889				-0.220278	-0.00998126	-0.708527	0.530504
	-0.0250138	-0.431791	-0.716736	-0.889819				-0.235852	-0.0555801	-0.671918	0.660487
	-0.0500194	-0.468392	-0.711565	-0.928138				-0.254012	-0.0702842	-0.729274	0.710793
	-0.0862202	-0.408334	-0.707178	-0.94929				-0.290788	0.0249568	-0.797201	0.682321
	-0.102065	-0.284612	-0.719346	-0.931198				-0.338688	0.0990451	-0.803123	0.568254
	-0.0919056	-0.217726	-0.756329	-0.868398				-0.366485	0.11332	-0.764035	0.465493
	-0.0920248	-0.179338	-0.806003	-0.837302				-0.37495	0.198037	-0.658972	0.462101
	-0.107414	-0.0965005	-0.830972	-0.889441				-0.373811	0.329086	-0.508227	0.47681
	-0.125216	-0.0434489	-0.79137	-0.955463				-0.351222	0.363397	-0.440493	0.470346
	-0.162503	-0.0861711	-0.699914	-0.948851				-0.31765	0.337811	-0.510414	0.526873
	-0.211977	-0.120983	-0.618667	-0.890077				-0.301654	0.326135	-0.611419	0.64671
	-0.226058	-0.106018	-0.583262	-0.814476				-0.302187	0.253395	-0.70723	0.758165
	-0.203764	-0.122229	-0.581287	-0.766408				-0.308408	0.136038	-0.840778	0.919601
	-0.185961	-0.124976	-0.595389	-0.819765				-0.346841	0.106044	-0.953599	1.11923
	-0.170683	-0.0632214	-0.632386	-0.989203				-0.405545	0.130107	-0.973331	1.23796
	-0.141589	-0.0396552	-0.678831	-1.11218				-0.43662	0.0888088	-0.947286	1.22473
	-0.117152	-0.0978118	-0.731161	-1.11319				-0.432042	0.0596612	-0.893788	1.12707
	-0.1008	-0.130392	-0.782172	-1.06976				-0.413157	0.124286	-0.761946	0.941701
	-0.0701724	-0.14796	-0.79117	-1.06223				-0.385338	0.165186	-0.634235	0.690626
	-0.0423754	-0.211905	-0.719333	-1.08983				-0.353637	0.145063	-0.617131	0.463137
	-0.0484456	-0.230902	-0.629105	-1.12144				-0.33556	0.156891	-0.642081	0.318857
	-0.0666303	-0.155623	-0.59781	-1.10577				-0.318236	0.169052	-0.619329	0.237384
	-0.0700567	-0.0927184	-0.62102	-0.997003				-0.28877	0.111956	-0.592337	0.223839
	-0.0687887	-0.0895125	-0.683889	-0.847446				-0.269307	0.103492	-0.592408	0.292007
	-0.0698072	-0.0543031	-0.774539	-0.744217				-0.277021	0.204084	-0.590705	0.406314
	-0.0583381	-0.00656068	-0.844406	-0.690558				-0.292832	0.282477	-0.641239	0.522973
	-0.0414052	-0.0273208	-0.846332	-0.655822				-0.295118	0.31806	-0.71715	0.692798
	-0.0367234	-0.0703504	-0.803849	-0.672575				-0.29318	0.405049	-0.744563	0.886287
	-0.0258339	-0.0814665	-0.743308	-0.742799				-0.285121	0.479116	-0.706955	0.95512
	0.00325228	-0.122168	-0.669692	-0.798404				-0.268921	0.468437	-0.694164	0.897346
	0.0224483	-0.194829	-0.627329	-0.849454				-0.257441	0.490499	-0.723292	0.842962
	0.0144643	-0.192282	-0.64352	-0.852887				-0.256448	0.575467	-0.718034	0.822577
	0.00173704	-0.163356	-0.684216	-0.802675				-0.247202	0.573433	-0.699276	0.831269
	-0.0114236	-0.189489	-0.694726	-0.714442				-0.229077	0.475187	-0.700764	0.849103
	-0.0323656	-0.18534	-0.682957	-0.677868				-0.224388	0.407543	-0.692622	0.833479
	-0.0326428	-0.110692	-0.672479	-0.717441				-0.223165	0.34608	-0.687238	0.681386
	0.000375482	-0.0722435	-0.66025	-0.733567				-0.222051	0.24208	-0.746086	0.468357
	0.0267707	-0.0794524	-0.66732	-0.712211				-0.238353	0.212171	-0.817145	0.32558
	0.0320982	-0.0466169	-0.697917	-0.718465				-0.271476	0.266709	-0.807901	0.262392
	0.0520144	-0.0368448	-0.706253	-0.778768				-0.286177	0.257515	-0.764759	0.229965
	0.0800235	-0.0940426	-0.676618	-0.877806				-0.264076	0.200994	-0.74984	0.212472
	0.0784226	-0.12219	-0.642597	-0.980417				-0.225022	0.207923	-0.739652	0.212357
	0.0634634	-0.09231	-0.592102	-1.01147				-0.19149	0.210716	-0.731187	0.189834
	0.063527	-0.0950972	-0.522502	-0.954158				-0.176412	0.1591	-0.759528	0.196921
	0.0648356	-0.119274	-0.481151	-0.900304				-0.180126	0.175484	-0.768317	0.305679
	0.0596649	-0.092	-0.492614	-0.918585				-0.186901	0.256273	-0.690848	0.419961
	0.0662484	-0.0744283	-0.534877	-0.951035				-0.177739	0.261971	-0.616652	0.420575
	0.0656916	-0.113465	-0.598876	-0.926164				-0.161481	0.229284	-0.641365	0.364294
	0.0407233	-0.120821	-0.686433	-0.861075				-0.1581	0.285948	-0.717988	0.287408
	0.0341484	-0.075928	-0.757076	-0.806271				-0.156392	0.363152	-0.782341	0.185604
	0.0619557	-0.0922078	-0.770148	-0.784588				-0.141507	0.387478	-0.840385	0.116605
	0.0810708	-0.152593	-0.741924	-0.801211				-0.129022	0.433538	-0.87871	0.0984327
	0.0859508	-0.169758	-0.702543	-0.818658				-0.134643	0.469075	-0.872583	0.0314055
	0.106667	-0.202733	-0.65829	-0.749114				-0.14542	0.387771	-0.875796	-0.0845383
	0.119341	-0.27406	-0.616535	-0.63175				-0.161755	0.283023	-0.889379	-0.141451
	0.105301	-0.281367	-0.600673	-0.601978				-0.184427	0.285497	-0.835317	-0.0956316
	0.0996519	-0.230818	-0.623763	-0.709553				-0.193999	0.309572	-0.744658	0.0128019
	0.106111	-0.236447	-0.697683	-0.860545				-0.181335	0.29725	-0.74109	0.166062
	0.0910381	-0.262469	-0.820512	-0.990418				-0.162943	0.33342	-0.802337	0.325483
	0.0668716	-0.24004	-0.927315	-1.0745				-0.149128	0.368437	-0.83791	0.386935
	0.0615243	-0.220684	-0.948905	-1.11942				-0.134977	0.285829	-0.861373	0.333974
	0.0562412	-0.219248	-0.912554	-1.11741				-0.130094	0.196007	-0.892311	0.28006
	0.0437002	-0.168797	-0.89738	-1.1428				-0.141891	0.221717	-0.869993	0.287261
	0.0477855	-0.0978619	-0.927927	-1.16988				-0.15563	0.237739	-0.824506	0.309969
	0.0581863	-0.100872	-0.988441	-1.14904				-0.148736	0.183114	-0.840743	0.374726
	0.0464797	-0.124931	-1.06012	-1.08356				-0.1311	0.174083	-0.874734	0.446588
	0.0282982	-0.105803	-1.13599	-1.01516				-0.114136	0.204562	-0.878759	0.403843
	0.0210109	-0.107619	-1.19571	-0.931441				-0.092056	0.194703	-0.851305	0.24662
	-0.00200285	-0.153009	-1.22915	-0.839921				-0.0769657	0.218661	-0.850939	0.116667
	-0.0463784	-0.140903	-1.22823	-0.796006				-0.0885358	0.296203	-0.823839	0.0553783
	-0.0754047	-0.0838522	-1.19578	-0.784855				-0.114841	0.278894	-0.788221	0.0473279
	-0.0815	-0.0946212	-1.15502	-0.749426				-0.137179	0.182937	-0.792888	0.115891
	-0.0808233	-0.128686	-1.13722	-0.706724				-0.165701	0.174403	-0.776975	0.212052
	-0.0573378	-0.114491	-1.13513	-0.686197				-0.185909	0.22616	-0.729029	0.227626
	-0.00746509	-0.120736	-1.1129	-0.645221				-0.170203	0.216837	-0.768521	0.197427
	0.0318196	-0.166933	-1.08116	-0.589322				-0.137828	0.216379	-0.901136	0.180731
	0.0477377	-0.168005	-1.07912	-0.57612				-0.114705	0.274076	-0.978315	0.174566
	0.0611093	-0.165078	-1.10396	-0.581023				-0.101495	0.279248	-0.964867	0.114067
	0.0694828	-0.219188	-1.12471	-0.547269				-0.0890749	0.258226	-0.914832	0.0419672
	0.0139536	-0.234916	-1.13505	-0.525288				-0.0823065	0.331812	-0.828248	-0.000109222
	0.00921268	-0.175311	-1.13057	-0.554757				-0.0753507	0.405074	-0.765375	0.00247252
	0.00244206	-0.137021	-1.0971	-0.602888				-0.0679178	0.351856	-0.813342	0.0721379
	-0.0261478	-0.135069	-1.06419	-0.642369				-0.0763979	0.281645	-0.923127	0.19087
	-0.0680537	-0.0802227	-1.05929	-0.686232				-0.104336	0.257146	-0.980878	0.236217
	-0.0922739	-0.0199767	-1.07165	-0.69734				-0.130686	0.184702	-1.02064	0.143658
	-0.0987582	-0.0457734	-1.07439	-0.671974				-0.140846	0.104486	-1.07266	0.0494842
	-0.106091	-0.103597	-1.05821	-0.666023				-0.151649	0.106699	-1.0519	0.0450723
	-0.101846	-0.14371	-1.01557	-0.70073				-0.162347	0.093993	-0.946194	0.0834104
	-0.0788877	-0.214532	-0.952771	-0.71034				-0.159038	0.0168076	-0.870021	0.119511
	-0.0666609	-0.28487	-0.927882	-0.700505				-0.143449	0.0293767	-0.870967	0.144474
	-0.0752665	-0.242752	-0.962235	-0.711685				-0.123391	0.152912	-0.912791	0.112317
	-0.0765117	-0.152747	-1.0136	-0.716666				-0.0936396	0.233562	-1.01197	0.0887428
	-0.0733114	-0.101574	-1.03531	-0.702251				-0.065704	0.254307	-1.12113	0.191384
	-0.0932368	-0.0194095	-1.05015	-0.724894				-0.0599312	0.266205	-1.11283	0.374177
	-0.117815	0.089739	-1.06347	-0.778102				-0.0512498	0.194009	-0.990547	0.468192
	-0.123137	0.104801	-1.05426	-0.801042				-0.0160278	0.0349275	-0.877638	0.445863
	-0.11984	0.0497984	-1.05003	-0.799385				0.0261056	-0.0415028	-0.82726	0.398006
	-0.106943	0.0288353	-1.07071	-0.808424				0.0508218	-0.0103807	-0.813908	0.378316
	-0.0746211	-0.0212156	-1.09718	-0.831714				0.0523826	0.0043746	-0.86354	0.365151
	-0.0621943	-0.125195	-1.12936	-0.884358				0.029118	0.0320774	-0.967517	0.342903
	-0.103806	-0.164252	-1.18732	-0.958666				-0.0168261	0.146806	-1.04763	0.254304
	-0.148945	-0.11713	-1.23503	-0.970364				-0.0584576	0.23061	-1.10311	0.0709977
	-0.150603	-0.0818024	-1.22425	-0.860502				-0.0789691	0.223914	-1.17252	-0.104946
	-0.124793	-0.059364	-1.15516	-0.694023				-0.0837077	0.249104	-1.20379	-0.125056
	-0.0818955	-0.00718629	-1.04348	-0.596519				-0.0760797	0.307926	-1.13667	-0.0139306
	-0.013971	-0.00991849	-0.925953	-0.570299				-0.0417997	0.305795	-1.03397	0.138652
	0.0350197	-0.0913881	-0.843262	-0.551111				0.00980686	0.292417	-0.934684	0.279791
	0.0338522	-0.128572	-0.803665	-0.489133				0.0516183	0.319987	-0.795274	0.311371
	0.0329977	-0.0929741	-0.764112	-0.361473				0.0811572	0.28872	-0.638616	0.185524
	0.0650226	-0.0781637	-0.705626	-0.146199				0.0979446	0.199285	-0.549651	0.02934
	0.104985	-0.0431042	-0.658146	0.0713975				0.0781341	0.187991	-0.48992	-0.0496799
	0.148589	0.074734	-0.61257	0.182822				0.0241917	0.229677	-0.387976	-0.0810905
	0.197752	0.160845	-0.512796	0.168368				-0.018103	0.21077	-0.286195	-0.0606718
	0.212948	0.17881	-0.351118	0.0558813				-0.0286599	0.186943	-0.227253	0.0373517
	0.19123	0.22515	-0.183358	-0.128712				-0.00596224	0.238127	-0.150804	0.161729
	0.182216	0.261343	-0.0562372	-0.26499				0.051694	0.27846	-0.0500564	0.235159
	0.189239	0.189719	-0.0072426	-0.246019				0.11757	0.276443	0.0344584	0.27179
	0.187851	0.0904981	-0.0489638	-0.105339				0.153633	0.407331	0.156595	0.287404
	0.20297	0.0230032	-0.13422	0.0734243				0.168692	0.598618	0.33645	0.294611
	0.255442	-0.0662387	-0.178807	0.281913				0.193526	0.69844	0.464571	0.382251
	0.305802	-0.131194	-0.182036	0.515611				0.222009	0.748729	0.513123	0.667135
	0.326406	-0.0676715	-0.112388	0.762372				0.236703	0.80419	0.576395	1.08066
	0.328876	0.0734101	0.00942674	1.05373				0.242214	0.765589	0.648873	1.44162
	0.307616	0.164381	0.13836	1.40345				0.249125	0.667507	0.661192	1.6516
	0.255768	0.216717	0.2223	1.72236				0.253743	0.65524	0.63986	1.70394
	0.209917	0.249842	0.263836	1.92261				0.26284	0.693971	0.693015	1.61071
	0.18947	0.202961	0.30586	2.0427				0.290704	0.689886	0.753746	1.51942
	0.165384	0.109867	0.354625	2.14494				0.311534	0.705991	0.842764	1.55645
	0.142814	0.0998393	0.382936	2.2505				0.304365	0.747977	1.00738	1.65851
	0.158262	0.165161	0.405931	2.38882				0.285533	0.701428	1.15334	1.72725
	0.194316	0.220464	0.453983	2.55622				0.269968	0.626544	1.17309	1.79606
	0.20277	0.309567	0.518776	2.6339				0.246432	0.665899	1.15317	1.85804
	0.189078	0.433282	0.573609	2.595				0.232698	0.751856	1.16413	1.87573
	0.17585	0.49124	0.620388	2.56121				0.247061	0.752237	1.15744	1.90737
	0.166602	0.495222	0.631732	2.61482				0.261801	0.734581	1.12987	2.00729
	0.178673	0.524297	0.585331	2.72314				0.259813	0.752216	1.1633	2.13851
	0.222605	0.513019	0.517128	2.87366				0.245945	0.717429	1.23916	2.26709
	0.258543	0.420556	0.466597	3.0028				0.227077	0.676407	1.31679	2.41484
	0.248164	0.368345	0.441391	3.02546				0.210622	0.737527	1.40662	2.52815
	0.218532	0.394122	0.469388	2.96762				0.215824	0.800714	1.43471	2.52886
	0.198914	0.434245	0.574315	2.95909				0.236719	0.784121	1.31824	2.46315
	0.192029	0.487352	0.692004	3.02859				0.239495	0.821784	1.15764	2.46083
	0.204166	0.584425	0.729473	3.10674				0.210078	0.927399	1.10819	2.51234
	0.24467	0.639152	0.769272	3.1481				0.167826	0.954839	1.13611	2.51865
	0.28961	0.605665	0.790713	3.13718				0.142068	0.936931	1.15134	2.44787
	0.308966	0.599463	0.798934	3.06563				0.140531	0.965057	1.16831	2.28932
	0.318884	0.668454	0.787709	3.00372				0.161452	0.953174	1.16236	2.07017
	0.331351	0.723131	0.753678	3.04041				0.18758	0.872332	1.09179	1.93574
	0.317011	0.741205	0.67144	3.13359				0.185034	0.862762	1.02921	1.93478
	0.27241	0.778879	0.562161	3.1996				0.152295	0.911158	1.05726	1.9466
	0.244098	0.770296	0.49507	3.25681				0.125559	0.894123	1.10263	1.89726
	0.252022	0.689662	0.490715	3.30645				0.127669	0.868964	1.14132	1.87585
	0.279613	0.641269	0.508119	3.29533				0.141405	0.909774	1.18958	1.92484
	0.320975	0.607866	0.522241	3.25843				0.160698	0.908377	1.21648	2.01858
	0.346076	0.503584	0.515709	3.23685				0.180438	0.828845	1.15524	2.12566
	0.318101	0.416614	0.454908	3.20335				0.191609	0.814617	1.05571	2.18693
	0.264172	0.462661	0.378771	3.14765				0.201662	0.87024	1.01071	2.1094
	0.241455	0.557734	0.35723	3.12186				0.21936	0.885455	0.994111	1.93544
	0.239444	0.619366	0.405337	3.10581				0.226366	0.907915	1.00131	1.83646
	0.22311	0.669985	0.482234	3.0651				0.204404	0.982554	1.08037	1.85687
	0.210211	0.679414	0.551369	3.00878				0.171376	0.986013	1.17942	1.88308
	0.208623	0.615701	0.58638	2.96276				0.150252	0.921869	1.19225	1.85916
	0.194293	0.583122	0.574393	2.89681				0.14051	0.934572	1.14358	1.80888
	0.180591	0.646715	0.558626	2.7996				0.132017	0.97594	1.1118	1.73457
	0.190446	0.673585	0.587102	2.71566				0.128138	0.947819	1.09397	1.71447
	0.186606	0.591279	0.648614	2.68766				0.118789	0.942818	1.10788	1.83397
	0.145616	0.502961	0.676328	2.69532				0.0892407	0.998188	1.20882	2.00595
	0.1182	0.459966	0.653234	2.7257				0.0566543	0.97275	1.30225	2.0837
	0.124612	0.432859	0.620724	2.75237				0.0330891	0.864619	1.25332	2.08485
	0.134537	0.486884	0.601603	2.71734				-0.00241322	0.810032	1.11822	2.0703
	0.154391	0.620191	0.592362	2.62729				-0.0477623	0.778688	1.01983	2.07259
	0.195021	0.673739	0.593203	2.59294				-0.0666789	0.694019	0.977636	2.14143
	0.221276	0.638599	0.585306	2.64085				-0.0594288	0.626775	0.969775	2.28749
	0.231547	0.643307	0.553076	2.70357				-0.0485743	0.609729	1.0353	2.39048
	0.260171	0.676834	0.521257	2.75328				-0.0359737	0.53937	1.11108	2.37731
	0.289023	0.671351	0.51407	2.79662				-0.0352846	0.44742	1.11579	2.32392
	0.284286	0.700222	0.514082	2.82123				-0.0616768	0.461059	1.10751	2.31458
	0.268431	0.781491	0.526898	2.84615				-0.0910633	0.511455	1.10262	2.3178
	0.265864	0.814925	0.589714	2.90426				-0.0912273	0.493249	1.01623	2.33023
	0.259384	0.817141	0.677792	2.95194				-0.0800634	0.486248	0.882652	2.35764
	0.252895	0.862642	0.726469	2.95244				-0.0763698	0.522295	0.817359	2.32728
	0.231779	0.896606	0.717645	2.94659				-0.0707402	0.494724	0.807332	2.29808
	0.236195	0.841484	0.654872	2.99242				-0.0555465	0.442632	0.775472	2.30102
	0.239781	0.788415	0.554569	3.03499				-0.0507114	0.451399	0.763571	2.33048
	0.262172	0.804962	0.45604	3.02116				-0.0615355	0.414963	0.791024	2.29095
	0.292976	0.822779	0.409175	2.97948				-0.0717833	0.276192	0.813968	2.21139
	0.287516	0.841848	0.391379	2.94227				-0.0838157	0.186088	0.850377	2.17014
	0.254769	0.914988	0.360834	2.88536				-0.081921	0.215388	0.931919	2.12747
	0.244134	0.953261	0.343091	2.84272				-0.0382514	0.262665	0.975687	2.05132
	0.259365	0.877718	0.381192	2.81557				0.0283171	0.327597	0.951548	2.004
	0.28281	0.809943	0.452376	2.7284				0.0606777	0.459017	0.980019	1.96588
	0.322353	0.794508	0.491748	2.57594				0.0473588	0.555082	1.09358	1.87159
	0.363108	0.751728	0.465109	2.46483				0.00391276	0.553744	1.15308	1.73753
	0.36523	0.717735	0.355597	2.42218				-0.0681771	0.565159	1.15832	1.58604
	0.332111	0.766763	0.229316	2.4241				-0.132405	0.603661	1.1647	1.38904
	0.29196	0.818035	0.203333	2.47331				-0.149797	0.551433	1.14482	1.20671
	0.24759	0.816042	0.280517	2.53507				-0.134003	0.464994	1.08085	1.17171
	0.199333	0.845176	0.34408	2.54864				-0.116333	0.446837	1.07088	1.33174
	0.172833	0.885683	0.329718	2.54352				-0.0977088	0.417657	1.1074	1.59698
	0.171972	0.854336	0.297001	2.55073				-0.0743247	0.346113	1.08393	1.88747
	0.177087	0.798869	0.300304	2.51515				-0.0596051	0.35719	0.991075	2.12126
	0.197993	0.812767	0.354662	2.41119				-0.0583694	0.423501	0.898043	2.19503
	0.246056	0.858009	0.450001	2.33318				-0.0737094	0.409416	0.8117	2.12521
	0.28041	0.879642	0.518529	2.35811				-0.101267	0.372544	0.768478	2.07022
	0.255566	0.927213	0.451075	2.4486				-0.135804	0.388357	0.832291	2.04944
	0.196996	0.96991	0.389863	2.55077				-0.15765	0.364884	0.92746	1.98575
	0.143788	0.922119	0.344721	2.64283				-0.163246	0.290619	0.953605	1.90567
	0.10339	0.851777	0.313879	2.68187				-0.174954	0.29834	0.937898	1.86611
	0.0921104	0.863171	0.288487	2.64424				-0.194977	0.367102	0.942658	1.83589
	0.123276	0.878036	0.257171	2.60471				-0.203343	0.381932	0.915094	1.8494
	0.158115	0.842179	0.179341	2.58277				-0.196601	0.37933	0.847608	1.87622
	0.164894	0.837406	0.0578022	2.55219				-0.18765	0.401873	0.8263	1.90644
	0.168744	0.837956	-0.0164357	2.53274				-0.171575	0.364613	0.84907	1.88504
	0.172854	0.785749	0.0124145	2.5622				-0.155825	0.289774	0.789499	1.84935
	0.153176	0.768597	0.0824594	2.59963				-0.154092	0.325326	0.778163	1.80856
	0.12876	0.838814	0.137215	2.62641				-0.15141	0.424663	0.802174	1.68609
	0.126921	0.878487	0.180288	2.64322				-0.136019	0.45224	0.796347	1.48777
	0.124535	0.860292	0.212	2.61409				-0.12651	0.475886	0.745115	1.33015
	0.108028	0.875322	0.224977	2.51489				-0.144012	0.555834	0.731846	1.2694
	0.113801	0.906201	0.2321	2.4121				-0.186449	0.580216	0.746143	1.27419
	0.13811	0.891937	0.228218	2.36083				-0.246219	0.54015	0.732227	1.37083
	0.145648	0.892372	0.197301	2.3505				-0.289933	0.53626	0.724524	1.5553
	0.152764	0.957214	0.172229	2.35446				-0.315073	0.490425	0.762585	1.74155
	0.184065	0.986672	0.181759	2.38144				-0.312307	0.341732	0.789842	1.9036
	0.209061	0.954071	0.194166	2.40431				-0.300261	0.24222	0.795167	2.04498
	0.20807	0.942567	0.180857	2.3792				-0.30233	0.259748	0.82967	2.03849
	0.20204	0.925939	0.169084	2.34284				-0.305037	0.268864	0.836402	1.84297
	0.171889	0.839995	0.203049	2.36462				-0.296666	0.251067	0.737109	1.61848
	0.10136	0.766829	0.276681	2.4187				-0.290057	0.282983	0.620437	1.49927
	0.0443374	0.742966	0.390357	2.44012				-0.288893	0.302169	0.582484	1.45844
	0.0363936	0.668807	0.515847	2.4118				-0.275264	0.263426	0.575367	1.48241
	0.0358618	0.580528	0.592568	2.29569				-0.258379	0.267601	0.579448	1.54922
	0.0187102	0.58434	0.585336	2.12502				-0.247753	0.310835	0.629061	1.56853
	0.00467741	0.629677	0.521597	2.02811				-0.236894	0.249753	0.651654	1.50673
	-0.0052648	0.651705	0.428015	2.06237				-0.237793	0.136345	0.580508	1.46727
	-0.0143441	0.723579	0.320625	2.14763				-0.266903	0.121216	0.506277	1.51197
	-0.00478617	0.842886	0.230404	2.23287				-0.305326	0.137316	0.477969	1.57423
	0.00941023	0.887799	0.186609	2.29978				-0.319884	0.101956	0.408503	1.6173
	-0.014907	0.864441	0.166041	2.31914				-0.312726	0.101156	0.328527	1.63676
	-0.0665306	0.854528	0.137818	2.24937				-0.298007	0.122591	0.329929	1.59892
	-0.0891526	0.839999	0.11315	2.12515				-0.282122	0.051147	0.364537	1.54853
	-0.0733282	0.780573	0.0974028	2.00508				-0.27213	-0.0295554	0.37589	1.62351
	-0.046213	0.752441	0.088603	1.93423				-0.28053	-0.00637576	0.410719	1.79429
	-0.0120769	0.765069	0.109109	1.93679				-0.297067	0.0196052	0.449274	1.87911
	0.0226232	0.729957	0.198089	2.0282				-0.298809	0.00390353	0.407632	1.85139
	0.038112	0.681658	0.332469	2.12597				-0.303326	0.0558052	0.348618	1.79417
	0.0480758	0.697295	0.441841	2.13966				-0.31875	0.155982	0.36271	1.7386
	0.0658043	0.691665	0.488382	2.11457				-0.316373	0.177227	0.38245	1.74827
	0.0588247	0.594389	0.473789	2.12802				-0.290298	0.153006	0.322655	1.85634
	0.0137032	0.521976	0.418368	2.1523				-0.268641	0.134995	0.226246	1.94855
	-0.0275247	0.507693	0.361066	2.17906				-0.258816	0.0428807	0.105784	1.92484
	-0.0478773	0.482936	0.333591	2.22366				-0.255878	-0.100928	-0.0234947	1.87533
	-0.072926	0.49224	0.313325	2.23377				-0.274541	-0.139316	-0.0379059	1.84134
	-0.104056	0.582528	0.29642	2.18648				-0.296884	-0.0813899	0.108892	1.7394
	-0.132329	0.658547	0.328803	2.15499				-0.305027	-0.0570285	0.253718	1.52822
	-0.16118	0.6787	0.407765	2.17501				-0.314738	-0.0284762	0.272088	1.31922
	-0.179028	0.724317	0.479558	2.21332				-0.339466	0.0314402	0.239804	1.22268
	-0.157376	0.78346	0.511691	2.27759				-0.352755	-0.0113146	0.217823	1.27654
	-0.115488	0.748461	0.518778	2.36649				-0.33362	-0.144869	0.214351	1.45988
	-0.107437	0.689602	0.494842	2.42977				-0.291738	-0.198351	0.257325	1.66474
	-0.136807	0.702082	0.467466	2.42888				-0.243811	-0.18765	0.31479	1.7536
	-0.163799	0.739541	0.492484	2.4045				-0.209075	-0.210744	0.302152	1.74858
	-0.181781	0.76569	0.56218	2.3506				-0.203486	-0.192949	0.276738	1.80072
	-0.200096	0.849496	0.62116	2.2514				-0.231458	-0.117734	0.361219	1.91411
	-0.198392	0.930973	0.656458	2.15429				-0.26231	-0.0999769	0.500875	1.97981
	-0.177197	0.901222	0.690146	2.11472				-0.271409	-0.121046	0.568271	1.95908
	-0.161467	0.839694	0.702519	2.08558				-0.276608	-0.08184	0.568423	1.90991
	-0.137775	0.843967	0.685102	2.03546				-0.291439	-0.039726	0.557611	1.84705
	-0.0972989	0.813112	0.664723	1.98984				-0.312487	-0.0758166	0.526495	1.83052
	-0.081753	0.717729	0.631385	1.95585				-0.342887	-0.110703	0.488461	1.87378
	-0.106829	0.658631	0.573733	1.92353				-0.376353	-0.117656	0.497146	1.87673
	-0.12436	0.592669	0.521105	1.93504				-0.38293	-0.188426	0.491954	1.77074
	-0.124122	0.462542	0.495035	1.97976				-0.365438	-0.282387	0.418812	1.65712
	-0.136712	0.370611	0.471939	2.01012				-0.352981	-0.269664	0.348266	1.63591
	-0.155631	0.363557	0.468938	2.03963				-0.344986	-0.212673	0.340477	1.69691
	-0.16235	0.3386	0.526043	2.12181				-0.337951	-0.206511	0.316527	1.80065
	-0.166889	0.298026	0.620537	2.2177				-0.344709	-0.172356	0.248365	1.91983
	-0.163284	0.309186	0.709901	2.25145				-0.371398	-0.096015	0.205861	1.95304
	-0.129379	0.31994	0.778491	2.20728				-0.398313	-0.0959835	0.1879	1.85657
	-0.108439	0.298472	0.80349	2.11985				-0.415684	-0.13943	0.153995	1.74836
	-0.151216	0.324937	0.753917	2.03201				-0.425188	-0.124907	0.132623	1.70263
	-0.219361	0.407531	0.675045	1.9748				-0.430985	-0.143489	0.103936	1.63745
	-0.259249	0.419341	0.632264	1.97044				-0.434743	-0.24233	0.00435794	1.53048
	-0.279988	0.368831	0.634255	1.96685				-0.45238	-0.285381	-0.0804658	1.4703
	-0.284548	0.36052	0.653398	1.91759				-0.487251	-0.244307	-0.0131636	1.48575
	-0.257669	0.348947	0.6843	1.86095				-0.504814	-0.241844	0.153262	1.5777
	-0.232752	0.273139	0.713516	1.84837				-0.487907	-0.27326	0.266902	1.77928
	-0.236325	0.225826	0.728534	1.83574				-0.455807	-0.274139	0.303064	2.00105
	-0.234047	0.245436	0.744552	1.80693				-0.421396	-0.328176	0.284537	2.11652
	-0.211662	0.250767	0.787708	1.7973				-0.390854	-0.470594	0.224761	2.14423
	-0.194288	0.283879	0.837174	1.80326				-0.388651	-0.571913	0.207075	2.13456
	-0.181548	0.393861	0.862702	1.79304				-0.406543	-0.587214	0.278871	2.06085
	-0.166796	0.461944	0.868334	1.80553				-0.404892	-0.604108	0.3113	1.92981
	-0.176093	0.407583	0.846348	1.83526				-0.380346	-0.588027	0.222198	1.83215
	-0.203814	0.318952	0.790429	1.83255				-0.349099	-0.485787	0.127786	1.81643
	-0.20552	0.226828	0.732308	1.78255				-0.311053	-0.444243	0.117923	1.85001
	-0.179313	0.0922784	0.696541	1.72078				-0.264947	-0.515511	0.139704	1.91427
	-0.163826	-0.00286416	0.661129	1.65398				-0.232147	-0.557202	0.184698	1.97887
	-0.158426	-0.00583866	0.618536	1.59967				-0.224363	-0.566054	0.254512	1.94372
	-0.137632	0.00264735	0.618233	1.60183				-0.23608	-0.648888	0.267547	1.80568
	-0.113646	-0.01392	0.682216	1.66715				-0.267556	-0.718559	0.209558	1.71832
	-0.107316	0.0280529	0.773486	1.72428				-0.314284	-0.691174	0.206632	1.75073
	-0.105052	0.111139	0.840284	1.75864				-0.356336	-0.683406	0.263757	1.82808
	-0.100955	0.122006	0.855445	1.80875				-0.375273	-0.719051	0.273124	1.92575
	-0.104052	0.0899918	0.82133	1.82417				-0.393862	-0.685253	0.23568	2.0029
	-0.0903936	0.091995	0.787197	1.74121				-0.416801	-0.613185	0.203914	1.98542
	-0.0521513	0.0808389	0.81904	1.62648				-0.420225	-0.615947	0.153424	1.91221
	-0.054427	0.0410651	0.89185	1.55624				-0.399997	-0.638024	0.10306	1.89013
	-0.0694366	0.0722226	0.929503	1.50659				-0.372745	-0.633549	0.145758	1.87617
	-0.106017	0.132441	0.900214	1.48759				-0.341076	-0.702247	0.232104	1.79947
	-0.136128	0.12345	0.840798	1.50533				-0.314925	-0.821255	0.262975	1.73002
	-0.152367	0.120381	0.797294	1.51618				-0.321157	-0.850647	0.277683	1.73773
	-0.133391	0.173823	0.75396	1.51836				-0.350166	-0.82913	0.316672	1.77823
	-0.0835044	0.183861	0.728179	1.57706				-0.379307	-0.85912	0.302432	1.83663
	-0.0567782	0.115821	0.716815	1.65571				-0.404021	-0.84261	0.227753	1.93981
	-0.0915001	0.0679245	0.714929	1.69292				-0.425094	-0.734499	0.202925	2.03065
	-0.160508	0.0372845	0.742227	1.7094				-0.441226	-0.691672	0.242829	2.057
	-0.221123	-0.0112897	0.802401	1.75397				-0.453716	-0.726539	0.307503	2.09034
	-0.256502	-0.0205047	0.83275	1.79223				-0.463703	-0.717094	0.412653	2.15376
	-0.24977	0.0136629	0.808032	1.79731				-0.456896	-0.705111	0.553023	2.15207
	-0.20659	-0.0172701	0.786992	1.78055				-0.432625	-0.737288	0.586509	2.06589
	-0.169351	-0.110144	0.803761	1.74493				-0.411484	-0.69606	0.53087	1.96271
	-0.152749	-0.131731	0.846609	1.69602				-0.414366	-0.602804	0.51358	1.85724
	-0.122825	-0.0891536	0.898517	1.73763				-0.425943	-0.621933	0.512994	1.75275
	-0.0900473	-0.0565333	0.939407	1.90997				-0.425274	-0.729552	0.461336	1.70554
	-0.0934789	0.00793644	0.926752	2.10396				-0.428689	-0.802662	0.405145	1.67901
	-0.102983	0.107638	0.877826	2.20815				-0.44142	-0.876873	0.39729	1.59422
	-0.0725394	0.113969	0.850548	2.22261				-0.458603	-0.980799	0.396342	1.517
	-0.0227084	0.0447871	0.837753	2.15497				-0.487353	-1.00078	0.401908	1.57321
	0.0107353	0.034465	0.81124	2.04122				-0.524625	-0.926573	0.444678	1.70318
	0.0315449	0.0364879	0.790233	1.98185				-0.539312	-0.888044	0.451752	1.777
	0.0287024	0.000824558	0.806713	1.98607				-0.533068	-0.869668	0.378483	1.76396
	-4.53197e-05	0.0109613	0.845731	1.96741				-0.532857	-0.792348	0.335053	1.67401
	-0.00883543	0.0659302	0.90524	1.89566				-0.537672	-0.758938	0.383854	1.51952
	0.0170514	0.048222	0.967136	1.81166				-0.530199	-0.818802	0.432648	1.39241
	0.0331317	-0.0141881	0.98652	1.72413				-0.505057	-0.829442	0.431148	1.35529
	0.0225511	-0.0279427	0.952924	1.65262				-0.460071	-0.773224	0.405935	1.33781
	0.013127	-0.0469591	0.922321	1.61868				-0.398351	-0.758836	0.342165	1.31181
	-0.00525687	-0.0978518	0.934326	1.60163				-0.355601	-0.749703	0.272294	1.36308
	-0.0470923	-0.0884863	0.973103	1.5289				-0.369037	-0.691354	0.314389	1.48573
	-0.0692477	-0.0121763	1.01329	1.40494				-0.418652	-0.689891	0.447114	1.56005
	-0.0554855	0.0199893	1.02264	1.30551				-0.452041	-0.747638	0.520414	1.55834
	-0.0415085	0.0209875	0.965466	1.2677				-0.463665	-0.735677	0.509868	1.51978
	-0.0221721	0.0551274	0.874674	1.26212				-0.482516	-0.682545	0.495121	1.44624
	0.0293784	0.0493194	0.833462	1.29962				-0.506622	-0.713762	0.47044	1.3877
	0.0713552	-0.0158143	0.860785	1.3493				-0.530992	-0.797204	0.429238	1.40892
	0.0658447	-0.0115325	0.901265	1.35992				-0.55023	-0.852519	0.430544	1.44816
	0.0362793	0.0549007	0.929253	1.35325				-0.537637	-0.932267	0.442648	1.4294
	-0.00196877	0.0523788	0.96073	1.39294				-0.49379	-1.02721	0.358298	1.40018
	-0.0498463	0.0213149	0.997891	1.43629				-0.467532	-1.0351	0.240204	1.38755
	-0.0506669	0.0301663	1.03757	1.43791				-0.472863	-0.989329	0.202598	1.31151
	0.000995852	0.0164261	1.0915	1.42721				-0.476702	-0.990705	0.210207	1.18188
	0.0607425	-0.0227515	1.13503	1.43466				-0.479248	-0.9615	0.19036	1.0972
	0.0892585	-0.000897089	1.13255	1.46057				-0.491884	-0.845622	0.173451	1.09506
	0.0946371	0.0388839	1.10093	1.52697				-0.507588	-0.796401	0.156213	1.13972
	0.084097	0.00423869	1.0826	1.64117				-0.52208	-0.849623	0.132069	1.23057
	0.0599525	-0.0166282	1.08004	1.74856				-0.546246	-0.865959	0.189307	1.3292
	0.0535043	0.0378462	1.0652	1.80345				-0.556035	-0.852126	0.332519	1.3462
	0.0748042	0.0659346	1.04784	1.84187				-0.521063	-0.887725	0.396617	1.291
	0.0828187	0.0237793	1.02672	1.88874				-0.463344	-0.881796	0.320234	1.2584
	0.0617125	0.00925678	0.993419	1.89858				-0.431541	-0.798405	0.227804	1.25178
	0.0545589	0.030602	0.956147	1.88722				-0.437907	-0.77824	0.175739	1.23077
	0.0784127	0.0227625	0.934361	1.89213				-0.456926	-0.838106	0.122475	1.24074
	0.108695	0.0491291	0.915036	1.84939				-0.480661	-0.87842	0.10709	1.27389
	0.138368	0.138081	0.905231	1.69577				-0.501193	-0.917105	0.124394	1.24088
	0.15719	0.177445	0.925956	1.54095				-0.513327	-0.989657	0.0812366	1.14655
	0.138583	0.153173	0.947101	1.49147				-0.537278	-0.9997	-0.0175847	1.03651
	0.103093	0.200551	0.94709	1.56034				-0.57203	-0.938983	-0.0638806	0.875411
	0.0975029	0.297741	0.96949	1.69835				-0.588679	-0.958649	-0.0570904	0.658179
	0.117362	0.355554	1.04689	1.80932				-0.583687	-1.0515	-0.04437	0.489749
	0.125362	0.411708	1.12623	1.78435				-0.584247	-1.07946	0.0307588	0.434242
	0.118813	0.447128	1.16188	1.68405				-0.588514	-1.06774	0.15197	0.483701
	0.104201	0.363102	1.18393	1.63009				-0.586795	-1.08643	0.217842	0.642021
	0.0721918	0.210365	1.19449	1.60727				-0.577173	-1.04843	0.216432	0.880246
	0.033872	0.147426	1.17068	1.52521				-0.551323	-0.956708	0.223562	1.07643
	0.0233966	0.160599	1.1264	1.4251				-0.512117	-0.945212	0.202774	1.1267
	0.0445279	0.175961	1.0912	1.37099				-0.477853	-0.971418	0.123736	1.08299
	0.0713497	0.231226	1.06653	1.34264				-0.469252	-0.924932	0.0613981	1.00491
	0.108178	0.321167	1.06813	1.30322				-0.477197	-0.896964	0.0594866	0.901848
	0.161715	0.349867	1.10526	1.27935				-0.484712	-0.951561	0.0646582	0.839606
	0.203	0.330797	1.12406	1.25284				-0.487617	-0.966313	0.0731383	0.867837
	0.219532	0.35882	1.09906	1.1902				-0.501445	-0.939364	0.120717	0.915369
	0.236738	0.370626	1.07088	1.14485				-0.528268	-0.988059	0.156412	0.941916
	0.246419	0.302558	1.0766	1.14421				-0.559536	-1.06466	0.146686	1.01725
	0.233446	0.249702	1.0813	1.13449				-0.591741	-1.06658	0.159004	1.13017
	0.235104	0.250222	1.07068	1.09262				-0.603625	-1.05204	0.184572	1.14866
	0.269253	0.220888	1.06605	1.05443				-0.58483	-1.0511	0.131105	1.05887
	0.301552	0.204779	1.07041	1.00165				-0.56426	-0.969238	0.028277	0.972929
	0.325138	0.296387	1.07791	0.955262				-0.562305	-0.847342	-0.020253	0.954395
	0.358306	0.401358	1.09404	0.989045				-0.602287	-0.819302	-0.0473069	1.00864
	0.369395	0.446244	1.09661	1.09014				-0.562587	-0.827782	-0.107954	1.1067
	0.326875	0.493673	1.06633	1.16192				-0.512508	-0.775075	-0.154706	1.16885
	0.280955	0.522899	1.04468	1.18296				-0.461111	-0.753591	-0.169703	1.10869
	0.2808	0.434302	1.07281	1.17631				-0.421694	-0.79519	-0.190396	1.00702
	0.313083	0.313512	1.11534	1.14669				-0.408251	-0.784718	-0.200018	0.979196
	0.353931	0.291569	1.11414	1.08223				-0.412466	-0.779583	-0.163486	0.980252
	0.387288	0.305448	1.12006	1.01875				-0.405705	-0.896404	-0.171005	0.951293
	0.373111	0.286989	1.10569	0.964193				-0.38964	-1.03236	-0.248762	0.934962
	0.318013	0.277325	1.08334	0.914125				-0.392727	-1.0836	-0.279674	0.9372
	0.296067	0.266747	1.09068	0.901233				-0.417497	-1.1349	-0.22771	0.939524
	0.321775	0.204131	1.14483	0.986375				-0.437388	-1.18667	-0.207692	0.991861
	0.338493	0.173652	1.20734	1.12223				-0.442144	-1.1332	-0.250449	1.07277
	0.337835	0.232707	1.2312	1.24455				-0.437314	-1.03639	-0.303557	1.05313
	0.350056	0.257348	1.21696	1.36855				-0.418278	-0.999555	-0.348637	0.953414
	0.369631	0.206866	1.18759	1.47712				-0.405565	-0.946224	-0.3496	0.908379
	0.401687	0.212022	1.16164	1.48877				-0.412859	-0.837794	-0.234982	0.934227
	0.469073	0.2897	1.16901	1.41128				-0.408156	-0.805237	-0.0984493	0.958804
	0.542706	0.338949	1.19972	1.31291				-0.373587	-0.861468	-0.0973709	0.971606
	0.576319	0.386566	1.2105	1.20879				-0.354348	-0.901466	-0.190352	0.959037
	0.580751	0.441798	1.19283	1.12614				-0.377074	-0.964682	-0.264929	0.889604
	0.577817	0.388849	1.19381	1.11462				-0.42431	-1.09833	-0.329979	0.826329
	0.557139	0.231264	1.21374	1.14361				-0.488196	-1.17967	-0.378059	0.859841
	0.526568	0.113758	1.20722	1.13744				-0.55199	-1.15463	-0.351041	0.940526
	0.520907	0.054672	1.1694	1.10886				-0.583701	-1.14581	-0.315435	0.987497
	0.534293	-0.0122959	1.15296	1.10834				-0.579716	-1.13873	-0.361192	1.02266
	0.535848	0.00953373	1.17604	1.15254				-0.571751	-1.03078	-0.404456	1.03421
	0.533981	0.119693	1.20936	1.21475				-0.570986	-0.919513	-0.387015	0.969695
	0.543743	0.207723	1.22502	1.28961				-0.566314	-0.914861	-0.389872	0.871505
	0.542783	0.226451	1.19543	1.33875				-0.567893	-0.949805	-0.43748	0.76169
	0.528711	0.240704	1.1185	1.33087				-0.5828	-1.0102	-0.474588	0.609315
	0.524752	0.211919	1.05465	1.31261				-0.599833	-1.16328	-0.534407	0.435918
	0.516816	0.100661	1.05018	1.32904				-0.612174	-1.30298	-0.642437	0.372438
	0.488696	0.0492598	1.08474	1.29379				-0.632719	-1.3023	-0.696085	0.440047
	0.483351	0.125505	1.1243	1.19062				-0.644384	-1.23843	-0.681017	0.540344
	0.521151	0.219825	1.16442	1.11892				-0.629471	-1.201	-0.679241	0.627576
	0.565253	0.279961	1.17946	1.11129				-0.618475	-1.12553	-0.678477	0.697387
	0.593246	0.351744	1.17281	1.10465				-0.632597	-1.02222	-0.595655	0.721466
	0.603016	0.369152	1.19153	1.1038				-0.656391	-1.01142	-0.498075	0.710646
	0.573658	0.290977	1.24014	1.09681				-0.673706	-1.06393	-0.46843	0.717603
	0.503466	0.250867	1.23849	1.05161				-0.684779	-1.08858	-0.463179	0.707364
	0.449841	0.276146	1.16152	0.998318				-0.675884	-1.14825	-0.497829	0.632373
	0.450357	0.262957	1.10257	0.975658				-0.654645	-1.26481	-0.493406	0.540549
	0.475916	0.214282	1.11324	0.937026				-0.642822	-1.30486	-0.479182	0.503879
	0.490082	0.210025	1.18517	0.855854				-0.641029	-1.26783	-0.44646	0.489493
	0.497053	0.191449	1.28906	0.793598				-0.643919	-1.26697	-0.482975	0.447963
	0.499183	0.113231	1.37619	0.737115				-0.655703	-1.25421	-0.60219	0.398131
	0.491362	0.0696543	1.39015	0.783818				-0.677271	-1.16837	-0.681651	0.327326
	0.500111	0.0721082	1.3582	0.878942				-0.685079	-1.116	-0.684971	0.207816
	0.530746	0.0471955	1.32646	0.991406				-0.668738	-1.14092	-0.678954	0.112714
	0.5465	0.0293792	1.27887	1.04003				-0.649117	-1.1551	-0.677351	0.114593
	0.54896	0.0873983	1.22619	0.998124				-0.645151	-1.18798	-0.659703	0.165615
	0.569635	0.117626	1.22347	0.955774				-0.656711	-1.3204	-0.678817	0.23544
	0.586935	0.065393	1.26674	0.990416				-0.68095	-1.46012	-0.733214	0.373993
	0.571886	0.0476179	1.30024	1.0755				-0.719206	-1.49932	-0.734161	0.552597
	0.561932	0.0874952	1.31677	1.18975				-0.746021	-1.50225	-0.687307	0.67739
	0.571932	0.0961374	1.33625	1.29597				-0.748208	-1.51451	-0.726531	0.738828
	0.576165	0.101284	1.3366	1.32664				-0.742429	-1.45492	-0.735822	0.752717
	0.577234	0.147951	1.33888	1.28021				-0.736877	-1.3633	-0.685437	0.678444
	0.588371	0.130346	1.37623	1.25182				-0.722522	-1.34799	-0.63613	0.549814
	0.583426	0.0328325	1.44123	1.23838				-0.708065	-1.35837	-0.636774	0.475966
	0.555968	-0.0155227	1.50018	1.20198				-0.701386	-1.3418	-0.655447	0.460795
	0.547427	-0.00217409	1.53642	1.15945				-0.687261	-1.39583	-0.692256	0.42098
	0.560716	0.00530624	1.52471	1.16402				-0.666742	-1.49362	-0.781804	0.340841
	0.558242	0.0611012	1.44143	1.21902				-0.656883	-1.46553	-0.854781	0.265281
	0.543258	0.200894	1.33991	1.30492				-0.664693	-1.33504	-0.852071	0.206765
	0.539645	0.307281	1.30872	1.38794				-0.675902	-1.23155	-0.84214	0.232317
	0.528462	0.342239	1.36723	1.4218				-0.687436	-1.13247	-0.85805	0.391881
	0.507848	0.365505	1.46743	1.37981				-0.698662	-1.02835	-0.815415	0.557461
	0.517745	0.335032	1.55799	1.32105				-0.697762	-1.02793	-0.725011	0.577989
	0.547989	0.194522	1.58314	1.32618				-0.687281	-1.09798	-0.665766	0.48752
	0.555284	0.0785623	1.5334	1.35846				-0.693227	-1.11811	-0.61527	0.366423
	0.552808	0.0943762	1.46985	1.35098				-0.720355	-1.13597	-0.539473	0.229929
	0.563827	0.153132	1.46377	1.32297				-0.736273	-1.21571	-0.511259	0.143955
	0.573329	0.201506	1.5043	1.28798				-0.733332	-1.25855	-0.530838	0.169206
	0.59072	0.271199	1.54774	1.2328				-0.720936	-1.21913	-0.499759	0.247831
	0.648081	0.316875	1.58731	1.22612				-0.692562	-1.21203	-0.440768	0.307281
	0.697444	0.293799	1.64581	1.3007				-0.655519	-1.22894	-0.467916	0.369062
	0.699965	0.297057	1.72048	1.37561				-0.634675	-1.16352	-0.566176	0.403334
	0.677085	0.337301	1.80053	1.3832				-0.626995	-1.09262	-0.676839	0.350168
	0.661671	0.298543	1.88538	1.35392				-0.614055	-1.10844	-0.810742	0.286719
	0.651912	0.19812	1.9645	1.29763				-0.612702	-1.11966	-0.911653	0.323839
	0.652647	0.158634	2.00596	1.23825				-0.629213	-1.10116	-0.891768	0.435235
	0.677038	0.16563	1.9912	1.23957				-0.648155	-1.16989	-0.824116	0.538898
	0.704909	0.141316	1.90167	1.34069				-0.705592	-1.27615	-0.811004	0.605718
	0.707804	0.137309	1.73664	1.47975				-0.708215	-1.29766	-0.782339	0.575593
	0.702053	0.169482	1.55542	1.58952				-0.709353	-1.28825	-0.701938	0.422633
	0.70698	0.160904	1.46478	1.63495				-0.700529	-1.29638	-0.639332	0.289083
	0.709428	0.127811	1.47749	1.58044				-0.691472	-1.23296	-0.606206	0.302411
	0.718326	0.143376	1.52527	1.40551				-0.685003	-1.13331	-0.550943	0.4115
	0.757272	0.145399	1.56849	1.23583				-0.670851	-1.13079	-0.537456	0.502396
	0.803328	0.0799385	1.61568	1.19033				-0.648377	-1.15778	-0.6056	0.52552
	0.825328	0.076075	1.68465	1.22851				-0.637955	-1.10809	-0.668659	0.42798
	0.838252	0.166732	1.78351	1.27618				-0.634349	-1.06981	-0.692191	0.23982
	0.838415	0.233657	1.90232	1.31905				-0.629315	-1.10503	-0.75926	0.126977
	0.797355	0.258346	1.97389	1.30942				-0.64586	-1.11886	-0.730213	0.18187
	0.733197	0.299915	1.97813	1.25301				-0.687076	-1.10633	-0.621267	0.320386
	0.68715	0.285699	1.96632	1.25223				-0.729469	-1.14961	-0.517827	0.427957
	0.659358	0.160544	1.96918	1.30301				-0.763617	-1.1688	-0.478999	0.485497
	0.630511	0.0511581	1.95675	1.30973				-0.793141	-1.09031	-0.426559	0.487517
	0.607978	0.0158319	1.92848	1.27716				-0.804527	-1.03953	-0.409088	0.431445
	0.605588	0.0159778	1.92715	1.28292				-0.792556	-1.07035	-0.499233	0.375762
	0.618553	0.0823759	1.94648	1.3326				-0.768782	-1.06951	-0.615375	0.359945
	0.651319	0.234265	1.95806	1.40855				-0.734107	-1.05854	-0.640103	0.336663
	0.71144	0.329489	1.98044	1.50093				-0.692473	-1.12365	-0.631795	0.297516
	0.769506	0.307283	2.02095	1.57306				-0.660435	-1.16508	-0.654237	0.306171
	0.792755	0.289997	2.05719	1.59331				-0.662652	-1.13417	-0.662041	0.338274
	0.811625	0.290656	2.08507	1.60366				-0.688337	-1.15048	-0.657382	0.314581
	0.840438	0.225258	2.11919	1.61292				-0.714183	-1.22109	-0.66356	0.265261
	0.841991	0.147185	2.11959	1.57164				-0.735812	-1.22877	-0.642523	0.24567
	0.817507	0.142638	2.07439	1.44051				-0.75118	-1.2113	-0.573412	0.214795
	0.808353	0.140067	2.02114	1.29701				-0.753913	-1.25296	-0.537673	0.166256
	0.815111	0.109874	1.99362	1.19766				-0.754104	-1.28151	-0.537912	0.151223
	0.832629	0.139071	1.99456	1.16146				-0.76217	-1.25083	-0.497355	0.126543
	0.879696	0.18978	2.04083	1.21244				-0.752462	-1.25177	-0.42291	0.058962
	0.919518	0.175731	2.11442	1.33747				-0.720557	-1.28002	-0.377199	0.027456
	0.900274	0.167152	2.13905	1.44822				-0.700335	-1.24225	-0.323151	0.0638532
	0.857171	0.229924	2.0948	1.51705				-0.706352	-1.20816	-0.23544	0.0719978
	0.847135	0.263432	2.03393	1.58302				-0.722091	-1.25358	-0.204371	-0.00624933
	0.858227	0.258391	1.99791	1.62712				-0.743362	-1.26892	-0.226895	-0.125238
	0.860404	0.309604	1.9973	1.59925				-0.764695	-1.20255	-0.286237	-0.240513
	0.85336	0.361731	2.05196	1.51035				-0.767986	-1.17402	-0.334437	-0.318489
	0.824567	0.313954	2.13893	1.3921				-0.766198	-1.20133	-0.395901	-0.293177
	0.77026	0.235099	2.19263	1.25284				-0.787194	-1.19212	-0.390711	-0.152175
	0.740765	0.200307	2.19799	1.1289				-0.820656	-1.19127	-0.27179	-0.00256149
	0.7653	0.151855	2.2037	1.07507				-0.830718	-1.23308	-0.169494	0.0906162
	0.800006	0.123501	2.22534	1.08246				-0.815585	-1.19822	-0.126164	0.133453
	0.816213	0.198113	2.23566	1.07558				-0.807356	-1.06904	-0.143494	0.0924256
	0.83868	0.29902	2.22009	1.03911				-0.788441	-0.991849	-0.198449	-0.0169775
	0.865554	0.324644	2.20218	1.01372				-0.797288	-0.982091	-0.257401	-0.0838755
	0.891582	0.350043	2.20668	0.995941				-0.837215	-0.963903	-0.225789	-0.099559
	0.94505	0.414145	2.27181	1.06798				-0.883565	-0.995887	-0.114647	-0.154315
	1.01497	0.421629	2.40051	1.20384				-0.904513	-1.09722	-0.0722781	-0.225799
	1.0482	0.382326	2.52287	1.32471				-0.908763	-1.14296	-0.131532	-0.231729
	1.05017	0.379702	2.55244	1.36288				-0.899069	-1.10623	-0.199384	-0.184378
	1.05597	0.377091	2.5012	1.36803				-0.861514	-1.10017	-0.256396	-0.128493
	1.04908	0.326791	2.43136	1.38363				-0.81696	-1.09164	-0.319973	-0.0843587
	1.00718	0.323077	2.38862	1.33216				-0.803582	-0.98586	-0.317966	-0.111315
	0.959266	0.381187	2.38749	1.19454				-0.819637	-0.883926	-0.264167	-0.264177
	0.93295	0.390602	2.41348	1.04191				-0.840479	-0.876225	-0.247112	-0.465678
	0.923071	0.376283	2.40924	0.940599				-0.865743	-0.880684	-0.258879	-0.611943
	0.925639	0.423442	2.35132	0.914611				-0.881333	-0.88712	-0.198466	-0.703348
	0.938884	0.477971	2.29144	0.974371				-0.871952	-0.973175	-0.13119	-0.770715
	0.942374	0.474265	2.26915	1.04858				-0.852271	-1.04808	-0.132156	-0.784753
	0.930384	0.494362	2.27053	1.02951				-0.848386	-1.02	-0.144259	-0.743273
	0.940151	0.537755	2.28003	0.922094				-0.861529	-1.00355	-0.141543	-0.676059
	0.982225	0.505011	2.3166	0.856639				-0.88022	-1.04807	-0.16695	-0.536903
	1.02072	0.441091	2.37029	0.899094				-0.909529	-1.03622	-0.194128	-0.332676
	1.04943	0.441881	2.42523	1.01101				-0.936855	-0.971227	-0.213327	-0.186157
	1.08397	0.448984	2.49348	1.16832				-0.940045	-0.971534	-0.297404	-0.14374
	1.10644	0.41369	2.56002	1.31965				-0.922224	-1.00003	-0.447325	-0.14765
	1.10609	0.43928	2.56573	1.3738				-0.903481	-1.00368	-0.535515	-0.10843
	1.10678	0.522554	2.51336	1.34868				-0.886787	-1.06705	-0.555263	-0.114956
	1.10119	0.563919	2.47999	1.32372				-0.871679	-1.1715	-0.584645	-0.154357
	1.05783	0.583598	2.49247	1.27112				-0.872798	-1.17619	-0.608836	-0.170152
	0.998785	0.630609	2.52721	1.18589				-0.88155	-1.11092	-0.582874	-0.179747
	0.966367	0.624385	2.57806	1.14576				-0.882719	-1.10987	-0.554998	-0.196186
	0.970916	0.544704	2.62022	1.14602				-0.874508	-1.12113	-0.541123	-0.216142
	0.992978	0.526747	2.63234	1.10132				-0.865184	-1.09457	-0.480095	-0.286596
	1.01531	0.586745	2.63784	1.03822				-0.853525	-1.12675	-0.420667	-0.412912
	1.02228	0.63435	2.66471	1.0067				-0.849724	-1.20403	-0.43248	-0.470884
	1.01292	0.681625	2.67329	1.01195				-0.86902	-1.19514	-0.45427	-0.402205
	1.02001	0.754231	2.66159	1.05772				-0.8988	-1.14888	-0.410579	-0.318876
	1.0658	0.75252	2.66931	1.17313				-0.916676	-1.17367	-0.352326	-0.308817
	1.10629	0.669553	2.70915	1.29843				-0.91476	-1.19954	-0.300138	-0.320665
	1.09421	0.651692	2.75774	1.33773				-0.910759	-1.20031	-0.2183	-0.325675
	1.06012	0.679691	2.82077	1.27891				-0.910554	-1.28968	-0.153168	-0.332659
	1.03269	0.6492	2.90851	1.19601				-0.909697	-1.44068	-0.157445	-0.317582
	1.00034	0.609436	2.97966	1.14712				-0.910939	-1.5115	-0.161586	-0.331681
	0.983993	0.617224	3.02278	1.17476				-0.908776	-1.5273	-0.119518	-0.469058
	1.00811	0.580796	3.04797	1.28061				-0.896306	-1.55347	-0.108866	-0.655747
	1.04281	0.497591	3.03012	1.36276				-0.887006	-1.51741	-0.175517	-0.742419
	1.07343	0.477956	2.94894	1.32014				-0.896305	-1.42843	-0.248796	-0.725944
	1.12487	0.495616	2.85116	1.21762				-0.907501	-1.42479	-0.315544	-0.659934
	1.17136	0.482888	2.80195	1.15335				-0.915183	-1.4868	-0.382198	-0.556202
	1.16915	0.500747	2.82719	1.11994				-0.942496	-1.48541	-0.402648	-0.464695
	1.14399	0.579042	2.93252	1.09347				-0.991379	-1.47752	-0.36682	-0.466431
	1.13224	0.598563	3.07746	1.07854				-1.03707	-1.53311	-0.370835	-0.536899
	1.12852	0.555177	3.15172	1.04294				-1.0666	-1.55683	-0.450057	-0.622055
	1.13088	0.54568	3.09562	0.976143				-1.07557	-1.52482	-0.419832	-0.718368
	1.15569	0.534468	2.96524	0.945487				-1.04983	-1.52459	-0.377628	-0.798656
	1.17291	0.461901	2.84324	0.977526				-1.00048	-1.50334	-0.417825	-0.758643
	1.15042	0.418193	2.7468	1.04004				-0.951774	-1.37447	-0.47416	-0.584138
	1.12176	0.443616	2.68657	1.10871				-0.910075	-1.2722	-0.483914	-0.417058
	1.12116	0.435665	2.66456	1.19353				-0.861142	-1.29118	-0.500728	-0.352759
	1.12135	0.415681	2.66145	1.27018				-0.817369	-1.32607	-0.522469	-0.398871
	1.11345	0.48246	2.66664	1.3156				-0.801477	-1.34611	-0.506406	-0.567251
	1.12598	0.570499	2.72463	1.34441				-0.808443	-1.42388	-0.497891	-0.77408
	1.14493	0.595966	2.85942	1.36359				-0.831301	-1.48733	-0.546153	-0.860387
	1.15287	0.62811	3.01641	1.31629				-0.859905	-1.45512	-0.574171	-0.794935
	1.17826	0.676529	3.14642	1.23135				-0.862525	-1.4341	-0.560145	-0.6768
	1.21049	0.648559	3.21894	1.19842				-0.820473	-1.46869	-0.580756	-0.546209
	1.20109	0.599896	3.2096	1.21178				-0.772307	-1.45971	-0.619961	-0.429954
	1.16605	0.621515	3.15086	1.21342				-0.744917	-1.42223	-0.589758	-0.392758
	1.15425	0.650916	3.12237	1.23989				-0.725848	-1.46227	-0.53524	-0.425473
	1.16564	0.62741	3.13494	1.31597				-0.719078	-1.51758	-0.513547	-0.467465
	1.1871	0.639386	3.13094	1.40119				-0.739036	-1.50434	-0.470776	-0.538569
	1.21975	0.702138	3.08353	1.4745				-0.772793	-1.50655	-0.404332	-0.669118
	1.24561	0.714474	3.03199	1.52122				-0.798021	-1.5365	-0.397504	-0.765699
	1.24932	0.712241	3.00168	1.49104				-0.815247	-1.49583	-0.415418	-0.756478
	1.25616	0.779594	2.9997	1.39782				-0.808061	-1.43305	-0.401787	-0.701501
	1.28878	0.839514	3.04581	1.33842				-0.76111	-1.45276	-0.405632	-0.675445
	1.31455	0.82997	3.11915	1.34269				-0.702187	-1.45971	-0.444163	-0.690218
	1.30008	0.854275	3.17638	1.34727				-0.668767	-1.37371	-0.438706	-0.753938
	1.2705	0.900221	3.23344	1.32046				-0.668244	-1.3093	-0.436391	-0.83025
	1.26106	0.864904	3.31778	1.29161				-0.688657	-1.30342	-0.508513	-0.812992
	1.27546	0.80857	3.38921	1.26749				-0.733656	-1.26832	-0.586299	-0.694622
	1.32875	0.799783	3.40104	1.26659				-0.780627	-1.23834	-0.614396	-0.601891
	1.41097	0.76265	3.38615	1.32132				-0.803908	-1.29322	-0.659159	-0.55068
	1.45959	0.691804	3.36809	1.39266				-0.811523	-1.33872	-0.749002	-0.449943
	1.4439	0.704065	3.35487	1.39138				-0.818678	-1.31794	-0.798453	-0.31956
	1.40716	0.76528	3.36534	1.36386				-0.815743	-1.32266	-0.791946	-0.264682
	1.37886	0.767223	3.40437	1.38348				-0.793352	-1.33955	-0.760102	-0.287786
	1.35551	0.756683	3.40888	1.42271				-0.761729	-1.27166	-0.68854	-0.333149
	1.34477	0.78395	3.36726	1.43721				-0.725213	-1.21038	-0.59973	-0.346402
	1.34713	0.755207	3.33906	1.42268				-0.701318	-1.27235	-0.586979	-0.289253
	1.3534	0.647555	3.3322	1.44811				-0.706827	-1.36056	-0.637529	-0.202555
	1.37904	0.590832	3.32456	1.41714				-0.727166	-1.40405	-0.640347	-0.2174
	1.4476	0.59749	3.34298	1.36504				-0.726199	-1.45951	-0.602489	-0.358322
	1.5282	0.607462	3.4178	1.33551				-0.698769	-1.47957	-0.606384	-0.486729
	1.56114	0.655508	3.51407	1.3402				-0.675208	-1.37564	-0.625592	-0.496396
	1.5477	0.730928	3.60508	1.39428				-0.670031	-1.2575	-0.626705	-0.430627
	1.53784	0.698156	3.6855	1.4929				-0.684484	-1.24103	-0.636359	-0.342307
	1.53457	0.579475	3.71763	1.58392				-0.714925	-1.24187	-0.632551	-0.248842
	1.51168	0.550915	3.68731	1.63328				-0.753191	-1.22774	-0.544125	-0.225059
	1.48175	0.601061	3.6526	1.67006				-0.783601	-1.28293	-0.424107	-0.300353
	1.448	0.643792	3.65675	1.70371				-0.805118	-1.35641	-0.351249	-0.377585
	1.40304	0.713498	3.68819	1.70095				-0.827911	-1.33171	-0.339114	-0.404736
	1.38486	0.806775	3.75627	1.66903				-0.834305	-1.27693	-0.390556	-0.463838
	1.39999	0.817943	3.87027	1.66919				-0.811526	-1.2671	-0.544944	-0.565825
	1.39493	0.785324	3.9745	1.69786				-0.782273	-1.22975	-0.729481	-0.656388
	1.35835	0.806383	4.0255	1.69455				-0.773002	-1.1916	-0.802577	-0.744718
	1.34431	0.810687	4.03678	1.68774				-0.775825	-1.27228	-0.767809	-0.832347
	1.36631	0.739289	4.0244	1.71272				-0.785984	-1.40238	-0.721951	-0.871892
	1.40567	0.695721	3.97549	1.74771				-0.799457	-1.44154	-0.672395	-0.923516
	1.46068	0.734366	3.92596	1.77167				-0.803876	-1.45167	-0.623587	-0.968314
	1.5031	0.760093	3.90532	1.77609				-0.804138	-1.478	-0.66648	-0.98078
	1.48939	0.774271	3.89496	1.70887				-0.826882	-1.42372	-0.782577	-0.938906
	1.4477	0.836312	3.87961	1.58484				-0.878289	-1.32085	-0.872023	-0.865919
	1.44584	0.860792	3.89581	1.51254				-0.921871	-1.31107	-0.953634	-0.867462
	1.4751	0.80294	3.96278	1.553				-0.928406	-1.35391	-1.05489	-0.876305
	1.47764	0.783765	4.05056	1.62941				-0.898972	-1.35484	-1.07318	-0.846504
	1.44948	0.837771	4.12663	1.65267				-0.853489	-1.39222	-0.993547	-0.79912
	1.41086	0.839909	4.16396	1.59257				-0.817754	-1.48326	-0.93157	-0.699237
	1.36804	0.796164	4.13729	1.47334				-0.81879	-1.50789	-0.910213	-0.570787
	1.35321	0.772032	4.06605	1.37142				-0.848794	-1.48567	-0.868952	-0.562323
	1.38745	0.720187	4.02119	1.37957				-0.863716	-1.5122	-0.856687	-0.696468
	1.42252	0.642205	4.04081	1.47285				-0.857965	-1.50383	-0.910519	-0.851316
	1.43003	0.635615	4.10704	1.53883				-0.856172	-1.39061	-0.967825	-0.972924
	1.44963	0.67221	4.19264	1.56305				-0.855974	-1.31401	-1.00673	-1.0869
	1.48561	0.642232	4.26809	1.60244				-0.838592	-1.31717	-1.06866	-1.14931
	1.50029	0.605772	4.29597	1.60536				-0.817274	-1.28288	-1.08758	-1.15156
	1.4957	0.637284	4.27878	1.51663				-0.806928	-1.2381	-1.01628	-1.17395
	1.49267	0.66476	4.26878	1.42546				-0.809055	-1.279	-0.949387	-1.2148
	1.48657	0.630488	4.28703	1.41273				-0.834034	-1.32646	-0.953931	-1.20287
	1.49117	0.603398	4.30447	1.48147				-0.869834	-1.32679	-0.941122	-1.16405
	1.53379	0.581502	4.30607	1.63301				-0.882129	-1.37695	-0.926397	-1.15164
	1.59429	0.502049	4.30201	1.81782				-0.852335	-1.43992	-0.990113	-1.14811
	1.61823	0.447953	4.28715	1.89785				-0.810947	-1.39035	-1.05504	-1.15621
	1.59779	0.488608	4.25425	1.84375				-0.780419	-1.29785	-1.03249	-1.23374
	1.558	0.517268	4.25202	1.76295				-0.762543	-1.29296	-0.986198	-1.32884
	1.50756	0.479894	4.28783	1.72961				-0.760722	-1.30932	-0.958794	-1.34664
	1.46219	0.486646	4.32102	1.72126				-0.767053	-1.29578	-0.909268	-1.30959
	1.46238	0.540894	4.32872	1.73735				-0.759975	-1.33714	-0.904651	-1.27083
	1.5019	0.57251	4.33565	1.7642				-0.739143	-1.40139	-1.00193	-1.18822
	1.53127	0.632489	4.32556	1.74164				-0.739028	-1.39372	-1.1142	-1.08559
	1.55343	0.720542	4.30002	1.66357				-0.754943	-1.38318	-1.20268	-1.06362
	1.5909	0.724077	4.30894	1.62197				-0.757342	-1.43145	-1.24571	-1.12598
	1.61713	0.639943	4.35404	1.62933				-0.754112	-1.42232	-1.24689	-1.18977
	1.60907	0.598416	4.39788	1.64162				-0.766135	-1.33618	-1.16533	-1.23857
	1.58542	0.58526	4.44492	1.66698				-0.78669	-1.32414	-1.09021	-1.284
	1.55904	0.525923	4.50603	1.69833				-0.801858	-1.38027	-1.12095	-1.31135
	1.53979	0.478816	4.5328	1.68393				-0.810583	-1.3898	-1.19241	-1.35779
	1.55926	0.483042	4.52769	1.66239				-0.803446	-1.39274	-1.23644	-1.42826
	1.6098	0.465102	4.55128	1.71003				-0.794017	-1.43092	-1.27064	-1.42772
	1.63901	0.429544	4.58865	1.79687				-0.805527	-1.40144	-1.30502	-1.27727
	1.63428	0.466053	4.58628	1.85981				-0.831086	-1.32003	-1.30327	-1.06651
	1.63739	0.500158	4.55381	1.90821				-0.837982	-1.31825	-1.3314	-0.938864
	1.66227	0.453197	4.52706	1.93307				-0.813029	-1.35466	-1.40797	-0.920825
	1.68141	0.43985	4.50145	1.89908				-0.782347	-1.32413	-1.43416	-0.980786
	1.69516	0.525859	4.4864	1.82708				-0.762992	-1.29481	-1.38117	-1.08167
	1.70559	0.587996	4.50366	1.75946				-0.767019	-1.32498	-1.34062	-1.11674
	1.68634	0.583788	4.50731	1.71135				-0.79838	-1.32469	-1.32582	-1.03429
	1.64401	0.573834	4.48452	1.69869				-0.833148	-1.30717	-1.29092	-0.942591
	1.62888	0.513499	4.47919	1.76895				-0.830467	-1.36638	-1.27618	-0.950854
	1.63025	0.423994	4.50453	1.90487				-0.796828	-1.43108	-1.30913	-1.01697
	1.61557	0.439522	4.52248	2.03484				-0.772537	-1.41182	-1.31405	-1.10364
	1.61762	0.54495	4.56884	2.10843				-0.767442	-1.40974	-1.25662	-1.20382
	1.65232	0.587791	4.69114	2.14484				-0.767875	-1.47043	-1.19383	-1.25553
	1.681	0.56206	4.84884	2.14919				-0.771615	-1.48617	-1.13827	-1.2265
	1.69896	0.556648	4.96985	2.12783				-0.771388	-1.4679	-1.06125	-1.19396
	1.7249	0.55103	5.01897	2.11854				-0.761154	-1.51365	-1.01013	-1.16714
	1.73672	0.557458	4.97904	2.12233				-0.768635	-1.56837	-1.02972	-1.07073
	1.72851	0.653692	4.87266	2.10591				-0.811254	-1.55559	-1.06362	-0.900419
	1.73829	0.787372	4.79033	2.11401				-0.85867	-1.55533	-1.11249	-0.71817
	1.76016	0.804546	4.79901	2.20355				-0.879916	-1.57319	-1.22058	-0.543292
	1.74909	0.742925	4.87071	2.33047				-0.877647	-1.49268	-1.33784	-0.42581
	1.70639	0.72357	4.95809	2.408				-0.867083	-1.36488	-1.35019	-0.459775
	1.6746	0.703223	5.03345	2.41331				-0.848533	-1.32621	-1.32672	-0.612999
	1.66621	0.654391	5.07046	2.32717				-0.82702	-1.34319	-1.34305	-0.768991
	1.67949	0.652427	5.05581	2.22506				-0.806005	-1.34454	-1.35664	-0.913601
	1.72415	0.666587	5.02575	2.11705				-0.778144	-1.39689	-1.36215	-1.09169
	1.76766	0.594967	5.01758	2.0635				-0.754886	-1.48378	-1.41828	-1.24821
	1.76125	0.514332	5.02559	2.0409				-0.773555	-1.4909	-1.48202	-1.35086
	1.72975	0.501474	5.05709	2.02171				-0.836258	-1.47688	-1.54973	-1.42694
	1.72239	0.485529	5.12366	2.06141				-0.892037	-1.54742	-1.61816	-1.4472
	1.72014	0.459513	5.19118	2.17946				-0.916465	-1.59483	-1.71616	-1.34208
	1.7094	0.515226	5.21624	2.30767				-0.911631	-1.52098	-1.74477	-1.1921
	1.71859	0.617955	5.22174	2.39877				-0.8835	-1.4411	-1.71357	-1.14575
	1.74153	0.662245	5.2377	2.45736				-0.852049	-1.40276	-1.71897	-1.22496
	1.74951	0.687353	5.24811	2.45441				-0.847425	-1.3544	-1.75093	-1.3845
	1.75324	0.727973	5.22391	2.39035				-0.855872	-1.36634	-1.7604	-1.58984
	1.75682	0.710135	5.18724	2.32772				-0.852487	-1.48636	-1.79046	-1.7664
	1.74112	0.645247	5.14697	2.28438				-0.854882	-1.57296	-1.83369	-1.85962
	1.7178	0.650372	5.10949	2.22725				-0.876688	-1.56099	-1.78818	-1.90904
	1.71696	0.710558	5.10832	2.20601				-0.903314	-1.56927	-1.68863	-1.94982
	1.72487	0.723897	5.17065	2.25792				-0.911706	-1.59356	-1.63449	-1.90175
	1.71334	0.741457	5.26772	2.33191				-0.900371	-1.52882	-1.5801	-1.77407
	1.70033	0.798058	5.35546	2.3839				-0.870321	-1.43845	-1.49906	-1.70002
	1.71632	0.803425	5.42091	2.43158				-0.828902	-1.42851	-1.49148	-1.71419
	1.75485	0.761887	5.45299	2.44734				-0.804017	-1.43959	-1.55491	-1.74141
	1.80486	0.78263	5.449	2.39454				-0.802869	-1.45268	-1.59291	-1.74249
	1.87292	0.815702	5.43913	2.33833				-0.807262	-1.55403	-1.62814	-1.68932
	1.93473	0.780348	5.43325	2.33224				-0.807302	-1.65699	-1.69595	-1.5285
	1.95083	0.757384	5.3904	2.32137				-0.816752	-1.61987	-1.71016	-1.33467
	1.93385	0.767546	5.31572	2.28556				-0.827297	-1.52782	-1.66023	-1.26322
	1.90542	0.726756	5.27119	2.2804				-0.825531	-1.48126	-1.61398	-1.32994
	1.8619	0.661151	5.23828	2.30081				-0.820466	-1.39757	-1.59497	-1.45893
	1.83115	0.683074	5.18535	2.31838				-0.818917	-1.29122	-1.57284	-1.61374
	1.84788	0.761112	5.14459	2.36263				-0.821512	-1.29797	-1.59697	-1.73815
	1.88411	0.825046	5.13745	2.4145				-0.830911	-1.36552	-1.65389	-1.75453
	1.89429	0.903639	5.12294	2.41101				-0.846915	-1.3805	-1.63801	-1.68425
	1.88802	0.976097	5.0885	2.39395				-0.842426	-1.39856	-1.55983	-1.61752
	1.88215	0.946272	5.08367	2.43806				-0.808804	-1.4482	-1.5537	-1.52601
	1.86906	0.859124	5.11487	2.51209				-0.77197	-1.42179	-1.6313	-1.37715
	1.85034	0.848536	5.18831	2.56357				-0.762219	-1.35207	-1.6915	-1.25844
	1.84826	0.864757	5.29813	2.63994				-0.786237	-1.36399	-1.73382	-1.24186
	1.85503	0.826621	5.39498	2.74295				-0.826726	-1.38537	-1.78458	-1.27753
	1.85013	0.816922	5.40853	2.81657				-0.862923	-1.32428	-1.80293	-1.3454
	1.86063	0.852611	5.3483	2.83953				-0.864935	-1.28645	-1.81291	-1.43088
	1.90263	0.843348	5.28077	2.80956				-0.830036	-1.32462	-1.86333	-1.45647
	1.93117	0.82871	5.2403	2.68905				-0.795563	-1.33904	-1.89618	-1.39833
	1.92423	0.889057	5.24693	2.58258				-0.787824	-1.3547	-1.85071	-1.39057
	1.90981	0.921823	5.32391	2.54382				-0.797836	-1.45563	-1.80816	-1.49105
	1.88388	0.886964	5.43486	2.5489				-0.822846	-1.54552	-1.82718	-1.61131
	1.84485	0.902741	5.49638	2.50696				-0.868049	-1.5387	-1.83528	-1.68929
	1.84384	0.970974	5.48588	2.4192				-0.904079	-1.52853	-1.80256	-1.69817
	1.87542	0.980449	5.4437	2.33047				-0.904955	-1.51838	-1.76363	-1.61973
	1.88478	0.951282	5.38401	2.25405				-0.878778	-1.39955	-1.71453	-1.51949
	1.8803	0.953558	5.33866	2.22408				-0.842767	-1.25742	-1.64244	-1.51111
	1.89784	0.942418	5.34781	2.28665				-0.804889	-1.22248	-1.64105	-1.57938
	1.91858	0.935967	5.40492	2.40221				-0.79086	-1.22284	-1.73744	-1.61947
	1.92567	1.03159	5.46733	2.49089				-0.810677	-1.19649	-1.83304	-1.63186
	1.93876	1.1814	5.51911	2.53717				-0.839179	-1.23154	-1.89005	-1.68028
	1.94591	1.23436	5.54533	2.56311				-0.86069	-1.31237	-1.96111	-1.75272
	1.92367	1.22081	5.51924	2.55568				-0.880546	-1.33341	-1.99935	-1.83318
	1.89218	1.23228	5.46675	2.5032				-0.903753	-1.3453	-1.97816	-1.93016
	1.87578	1.20545	5.45003	2.45463				-0.922201	-1.40788	-1.98798	-2.00889
	1.85316	1.13659	5.49726	2.42999				-0.943225	-1.4211	-2.04468	-2.03185
	1.82683	1.1278	5.56928	2.40789				-0.966705	-1.34481	-2.09015	-2.06523
	1.84209	1.13296	5.63469	2.39094				-0.970776	-1.31831	-2.05615	-2.13603
	1.89743	1.05465	5.66497	2.39421				-0.956526	-1.35786	-2.0494	-2.13319
	1.94497	0.996605	5.62661	2.38149				-0.960598	-1.34985	-2.0505	-1.97706
	1.97309	1.02641	5.5362	2.35103				-0.986509	-1.32611	-2.01702	-1.75068
	1.97842	1.02574	5.47892	2.34618				-0.996541	-1.34812	-1.97592	-1.55387
	1.93809	0.970285	5.48452	2.35821				-0.986771	-1.33119	-1.9151	-1.46627
	1.88217	0.94153	5.52008	2.33426				-0.96602	-1.27006	-1.81523	-1.53283
	1.86911	0.922523	5.57935	2.30839				-0.931004	-1.29435	-1.77335	-1.70753
	1.88477	0.87503	5.67323	2.33188				-0.89947	-1.37166	-1.86408	-1.85068
	1.89278	0.88675	5.78058	2.38379				-0.901119	-1.39444	-1.98753	-1.93179
	1.90003	0.965564	5.87804	2.43095				-0.926668	-1.42787	-2.05048	-2.01965
	1.91153	0.983897	5.93265	2.46498				-0.960853	-1.52243	-2.08513	-2.09319
	1.91419	0.924813	5.88805	2.44064				-1.00884	-1.56063	-2.1331	-2.07742
	1.917	0.895113	5.7521	2.33408				-1.06061	-1.50988	-2.06063	-1.98986
	1.93158	0.889086	5.63066	2.2478				-1.10497	-1.48589	-1.97591	-1.88319
	1.93811	0.86114	5.59312	2.26398				-1.14238	-1.47324	-1.95412	-1.77295
	1.9169	0.899801	5.6015	2.30115				-1.16666	-1.3978	-1.92008	-1.72888
	1.89213	1.00089	5.60002	2.2933				-1.15328	-1.3523	-1.87256	-1.80058
	1.88948	1.03032	5.61313	2.25207				-1.10198	-1.40759	-1.87447	-1.8921
	1.89171	1.00194	5.65865	2.20476				-1.05985	-1.45602	-1.89253	-1.90891
	1.89046	1.0341	5.72078	2.16282				-1.04881	-1.4667	-1.85334	-1.90865
	1.90148	1.08181	5.78409	2.18073				-1.04451	-1.52751	-1.82415	-1.95732
	1.91746	1.08825	5.82493	2.24881				-1.02416	-1.57833	-1.87862	-2.0216
	1.91562	1.12829	5.8163	2.23225				-0.99619	-1.54043	-1.88513	-2.07216
	1.90301	1.18029	5.78954	2.19152				-0.966237	-1.51042	-1.86887	-2.09979
	1.87431	1.15827	5.81692	2.1825				-0.949461	-1.51235	-1.86853	-2.05235
	1.82315	1.12296	5.8612	2.23006				-0.961363	-1.42364	-1.8777	-1.95264
	1.79638	1.16345	5.87079	2.31115				-0.980845	-1.29543	-1.89352	-1.89953
	1.83751	1.21393	5.84891	2.42796				-0.986844	-1.2893	-1.96265	-1.92952
	1.91335	1.21674	5.79893	2.52003				-0.987678	-1.35936	-2.08357	-1.96109
	1.97049	1.23982	5.70795	2.51366				-0.998388	-1.39685	-2.04632	-1.98399
	1.99817	1.26998	5.62184	2.43207				-1.00345	-1.44213	-1.88729	-2.05197
	1.99195	1.22466	5.58466	2.33896				-0.985921	-1.49412	-1.74916	-2.14592
	1.93842	1.15663	5.56584	2.2155				-0.948487	-1.45469	-1.69675	-2.20554
	1.86487	1.1746	5.55234	2.05945				-0.906731	-1.3869	-1.68784	-2.21831
	1.82389	1.19683	5.57246	1.97067				-0.885174	-1.41816	-1.71654	-2.16609
	1.82288	1.15744	5.61743	1.99073				-0.894752	-1.47813	-1.75443	-2.05488
	1.83472	1.15302	5.64722	2.04508				-0.92865	-1.48374	-1.71247	-1.99686
	1.86489	1.18395	5.64592	2.07859				-0.950654	-1.52506	-1.62991	-2.06604
	1.90435	1.16262	5.63068	2.07823				-0.941852	-1.61662	-1.61472	-2.15659
	1.91183	1.14303	5.60514	2.02722				-0.925798	-1.64257	-1.67025	-2.16654
	1.90093	1.18969	5.59972	1.97254				-0.929564	-1.63305	-1.74143	-2.14087
	1.91673	1.21139	5.64641	2.00803				-0.946198	-1.65993	-1.846	-2.12837
	1.9447	1.21007	5.72001	2.11266				-0.975678	-1.63446	-1.94539	-2.12403
	1.96524	1.27144	5.75947	2.20351				-1.01208	-1.5333	-1.96946	-2.15383
	2.01243	1.33415	5.75664	2.28338				-1.032	-1.51569	-1.95167	-2.22688
	2.07258	1.30057	5.74372	2.35816				-1.03588	-1.60662	-1.98268	-2.25752
	2.09817	1.24492	5.73747	2.37883				-1.03685	-1.67479	-2.02024	-2.19935
	2.09801	1.2556	5.76574	2.32231				-1.02651	-1.73133	-1.98606	-2.10247
	2.08924	1.26543	5.82872	2.25618				-0.989984	-1.80983	-1.92242	-1.98496
	2.04753	1.25343	5.8854	2.20738				-0.948864	-1.80967	-1.87755	-1.84024
	1.98551	1.27823	5.90433	2.15899				-0.932819	-1.71766	-1.82282	-1.77886
	1.95199	1.29372	5.91748	2.11543				-0.940463	-1.6778	-1.80859	-1.85733
	1.94505	1.23642	5.94316	2.08495				-0.96041	-1.67803	-1.88985	-1.98243
	1.93392	1.19089	5.95527	2.02811				-0.983474	-1.60214	-1.96684	-2.08634
	1.92292	1.20718	5.92817	1.94164				-0.997799	-1.52458	-1.96043	-2.18742
	1.9181	1.17817	5.88507	1.8808				-0.992688	-1.53626	-1.96673	-2.24628
	1.89734	1.1065	5.86546	1.85714				-0.98848	-1.54884	-2.00835	-2.23243
	1.87035	1.1024	5.89305	1.8601				-1.00104	-1.52692	-2.0003	-2.19861
	1.8823	1.13083	5.97049	1.93705				-1.00698	-1.57327	-1.95904	-2.17934
	1.91578	1.11042	6.08027	2.06281				-0.9971	-1.64233	-1.94549	-2.12141
	1.9225	1.12412	6.15003	2.11575				-1.00167	-1.62223	-1.92302	-2.02882
	1.91242	1.17957	6.13346	2.07561				-1.03001	-1.59951	-1.89913	-1.96163
	1.90782	1.15628	6.08498	2.03222				-1.05504	-1.64319	-1.94354	-1.91557
	1.89382	1.08434	6.06785	2.01199				-1.07612	-1.65214	-2.0239	-1.8667
	1.88419	1.06928	6.09137	1.98932				-1.0868	-1.61771	-2.04812	-1.86801
	1.90319	1.0871	6.14942	1.98284				-1.07558	-1.64287	-2.0781	-1.92684
	1.91892	1.08154	6.18762	1.97681				-1.06318	-1.65692	-2.16209	-1.9674
	1.90496	1.11868	6.14765	2.0595				-1.07211	-1.578	-2.21047	-1.99062
	1.88287	1.17673	6.05486	2.19072				-1.08326	-1.53724	-2.18845	-2.0483
	1.85608	1.23655	5.99852	2.36198				-1.07769	-1.60416	-2.15304	-2.10613
	1.80474	1.26038	5.9911	2.494				-1.08244	-1.64956	-2.10264	-2.13227
	1.75533	1.32812	5.99276	2.52973				-1.10562	-1.63598	-1.99936	-2.19547
	1.74479	1.36948	6.00275	2.52132				-1.13169	-1.65354	-1.94144	-2.308
	1.76039	1.30928	6.02281	2.524				-1.15388	-1.65777	-1.99229	-2.37504
	1.76985	1.26774	6.02801	2.50491				-1.17365	-1.59491	-2.05002	-2.34622
	1.77638	1.28352	6.00817	2.46946				-1.17889	-1.56655	-2.06781	-2.23693
	1.78366	1.26811	6.00053	2.45623				-1.16474	-1.6012	-2.0949	-2.0387
	1.77695	1.25167	5.99555	2.4534				-1.1558	-1.59992	-2.1039	-1.81513
	1.77067	1.28643	6.00057	2.44992				-1.15464	-1.60503	-2.08576	-1.66849
	1.79133	1.2779	6.07543	2.4903				-1.14337	-1.71299	-2.11305	-1.62092
	1.8182	1.20021	6.20994	2.52142				-1.11982	-1.7983	-2.18055	-1.60715
	1.83559	1.20057	6.28748	2.45917				-1.10034	-1.7497	-2.18532	-1.63
	1.87264	1.28089	6.25209	2.35398				-1.0865	-1.68002	-2.14585	-1.71193
	1.92352	1.33545	6.16698	2.29466				-1.08043	-1.66054	-2.12801	-1.80905
	1.93968	1.37173	6.09287	2.21895				-1.09824	-1.62493	-2.1212	-1.86719
	1.91635	1.42811	6.09258	2.22426				-1.11722	-1.60968	-2.11034	-1.8975
	1.87786	1.43093	6.20527	2.25807				-1.11902	-1.66917	-2.12736	-1.90005
	1.83688	1.3773	6.33225	2.28928				-1.11087	-1.69547	-2.15115	-1.85555
	1.81679	1.38355	6.34806	2.31362				-1.10789	-1.65176	-2.11523	-1.82496
	1.85314	1.42684	6.2709	2.37966				-1.10544	-1.65859	-2.08009	-1.87634
	1.92228	1.41834	6.21119	2.48794				-1.10325	-1.71736	-2.13204	-1.96078
	1.95725	1.42729	6.19586	2.57206				-1.10988	-1.70832	-2.22297	-1.99937
	1.94345	1.53487	6.19354	2.59962				-1.12023	-1.66675	-2.25598	-2.02562
	1.91854	1.61677	6.15054	2.59426				-1.11967	-1.69124	-2.26073	-2.03622
	1.89944	1.6121	6.03622	2.5526				-1.11449	-1.73201	-2.25779	-2.01285
	1.8834	1.63814	5.90753	2.44302				-1.1162	-1.76396	-2.22766	-2.00485
	1.8908	1.6861	5.88454	2.302				-1.11945	-1.86777	-2.2253	-2.04297
	1.90744	1.68159	6.00685	2.16283				-1.12288	-1.9788	-2.30044	-2.05191
	1.8949	1.6967	6.17967	2.01844				-1.13904	-1.94667	-2.37132	-1.99866
	1.87739	1.75228	6.30882	1.9024				-1.16143	-1.85641	-2.37722	-1.9408
	1.89156	1.71364	6.36732	1.90853				-1.1729	-1.84417	-2.36167	-1.91706
	1.90482	1.60643	6.36865	2.02771				-1.17964	-1.8391	-2.3511	-1.90262
	1.90153	1.56422	6.34337	2.19282				-1.18643	-1.7928	-2.2927	-1.91631
	1.91605	1.55212	6.3475	2.37779				-1.17025	-1.78817	-2.26763	-1.95065
	1.93915	1.51623	6.39077	2.56612				-1.13367	-1.81161	-2.31566	-1.92116
	1.94846	1.52599	6.43443	2.70216				-1.10335	-1.79497	-2.36335	-1.78253
	1.9725	1.59008	6.46364	2.75836				-1.09351	-1.82198	-2.36383	-1.61942
	2.01388	1.60054	6.48086	2.72617				-1.103	-1.91753	-2.39525	-1.4735
	2.02919	1.58688	6.46806	2.61972				-1.12711	-1.93707	-2.47164	-1.32906
	2.01853	1.64815	6.43249	2.4704				-1.15161	-1.8503	-2.51194	-1.33735
	2.02039	1.71453	6.42298	2.36653				-1.16028	-1.78576	-2.52234	-1.47419
	2.03032	1.68496	6.4806	2.33951				-1.16257	-1.74928	-2.56281	-1.65259
	2.03006	1.64396	6.58569	2.31204				-1.17312	-1.67545	-2.5912	-1.80264
	2.0393	1.65961	6.68983	2.24494				-1.19053	-1.65221	-2.57826	-1.89717
	2.07268	1.65553	6.74861	2.19623				-1.20294	-1.71719	-2.58224	-1.86887
	2.096	1.65222	6.73778	2.17511				-1.22351	-1.74189	-2.57257	-1.73547
	2.08632	1.70141	6.66513	2.15485				-1.25873	-1.71033	-2.50124	-1.65124
	2.06049	1.70764	6.60613	2.18573				-1.27954	-1.74351	-2.43572	-1.67471
	2.01531	1.63273	6.61571	2.26097				-1.26737	-1.79393	-2.42896	-1.68792
	1.95749	1.61968	6.6576	2.28022				-1.23481	-1.76046	-2.39916	-1.63028
	1.93447	1.69432	6.67548	2.22456				-1.19239	-1.74504	-2.34823	-1.5455
	1.95552	1.73977	6.67257	2.1543				-1.14433	-1.80195	-2.37022	-1.42655
	1.9793	1.76077	6.65552	2.04061				-1.11933	-1.81854	-2.46351	-1.27118
	2.00461	1.808	6.63043	1.89422				-1.11962	-1.79174	-2.55098	-1.14275
	2.04671	1.82988	6.63697	1.82576				-1.13621	-1.80945	-2.63276	-1.04665
	2.0823	1.7996	6.66401	1.88062				-1.14549	-1.79602	-2.68284	-0.959674
	2.09776	1.80799	6.66058	1.97987				-1.17042	-1.69989	-2.61928	-0.923483
	2.11394	1.84348	6.63479	2.1087				-1.18579	-1.65952	-2.48079	-0.979198
	2.12702	1.80806	6.6443	2.25437				-1.17321	-1.70038	-2.40425	-1.03912
	2.114	1.76139	6.63835	2.36369				-1.14621	-1.69029	-2.3977	-1.08005
	2.08828	1.81007	6.69829	2.41298				-1.10992	-1.64096	-2.43288	-1.18054
	2.07662	1.88907	6.74332	2.46541				-1.07004	-1.66016	-2.45329	-1.34911
	2.06969	1.91099	6.74137	2.52089				-1.0465	-1.68586	-2.4886	-1.48442
	2.05582	1.94475	6.66264	2.50798				-1.05112	-1.65791	-2.4619	-1.55829
	2.05822	1.96714	6.54184	2.42474				-1.07082	-1.67519	-2.45483	-1.57691
	2.08913	1.9005	6.46347	2.33319				-1.09006	-1.72959	-2.56786	-1.53381
	2.12513	1.84133	6.44231	2.26052				-1.11827	-1.68962	-2.72251	-1.48087
	2.16277	1.86637	6.44858	2.26154				-1.14543	-1.60439	-2.8261	-1.46709
	2.20182	1.87065	6.49204	2.38054				-1.15282	-1.59704	-2.89078	-1.42818
	2.20402	1.821	6.55123	2.50157				-1.13612	-1.59277	-2.91265	-1.31581
	2.1581	1.83821	6.59372	2.49865				-1.10256	-1.55014	-2.8394	-1.22708
	2.12108	1.91199	6.63407	2.44058				-1.054	-1.57586	-2.72346	-1.25988
	2.12048	1.96525	6.69897	2.41502				-1.01249	-1.62606	-2.62467	-1.36325
	2.13219	2.03308	6.73449	2.40604				-1.00724	-1.56181	-2.52723	-1.44799
	2.14642	2.12368	6.72687	2.41236				-1.02001	-1.46491	-2.42526	-1.47507
	2.15015	2.12008	6.73414	2.45851				-1.02781	-1.46056	-2.39109	-1.42874
	2.11924	2.01611	6.75866	2.53138				-1.03193	-1.46848	-2.43489	-1.33456
	2.07227	1.96565	6.75729	2.60314				-1.04107	-1.44868	-2.49099	-1.28946
	2.06285	1.98192	6.71992	2.67576				-1.05339	-1.48279	-2.56632	-1.32673
	2.08464	1.99731	6.66363	2.69514				-1.06464	-1.53215	-2.68068	-1.3495
	2.09113	2.05414	6.60001	2.65322				-1.06954	-1.50655	-2.73954	-1.31224
	2.08637	2.1534	6.58233	2.57459				-1.05407	-1.50164	-2.69399	-1.26768
	2.09917	2.15322	6.64208	2.53428				-1.02702	-1.59076	-2.63103	-1.22984
	2.11515	2.06071	6.7248	2.50711				-1.02048	-1.64516	-2.59751	-1.17172
	2.11959	2.03127	6.75818	2.45645				-1.04418	-1.62161	-2.54915	-1.13636
	2.13562	2.03211	6.74128	2.43177				-1.06065	-1.62816	-2.53156	-1.1261
	2.15114	2.00169	6.71115	2.48506				-1.05037	-1.64787	-2.55916	-1.09801
	2.13594	2.03803	6.6749	2.57532				-1.03264	-1.59735	-2.53458	-1.05667
	2.1305	2.15294	6.64419	2.65991				-1.01525	-1.57121	-2.42512	-1.05355
	2.16181	2.19077	6.64052	2.72079				-0.994096	-1.62129	-2.32855	-1.07161
	2.1787	2.15415	6.64078	2.72562				-0.97992	-1.63565	-2.28453	-1.09735
	2.15878	2.12802	6.63968	2.68393				-0.974968	-1.6269	-2.27186	-1.15936
	2.13438	2.07752	6.66787	2.66892				-0.958318	-1.70449	-2.32195	-1.24797
	2.09659	1.99072	6.72154	2.69086				-0.943229	-1.79711	-2.42495	-1.28384
	2.03901	1.95624	6.74165	2.68796				-0.950924	-1.8087	-2.46978	-1.25146
	2.00319	1.96785	6.73111	2.65323				-0.970055	-1.83383	-2.4197	-1.21278
	1.99833	1.92462	6.73893	2.62965				-0.987319	-1.90813	-2.37443	-1.17942
	2.00169	1.87824	6.79001	2.62499				-0.998726	-1.91798	-2.34975	-1.14109
	2.02458	1.92411	6.88467	2.61624				-1.01206	-1.86805	-2.29202	-1.15456
	2.07157	1.99568	7.01098	2.60681				-1.01843	-1.87054	-2.24522	-1.22766
	2.09397	2.02789	7.10422	2.60296				-1.02535	-1.89533	-2.24862	-1.30492
	2.06784	2.09825	7.09198	2.5996				-1.03345	-1.87901	-2.22031	-1.39232
	2.03726	2.1897	6.98463	2.61502				-1.02389	-1.91011	-2.16564	-1.51392
	2.03619	2.17864	6.86281	2.69586				-0.992367	-1.98891	-2.1585	-1.57184
	2.04946	2.12703	6.78393	2.79605				-0.977527	-1.97612	-2.15054	-1.49277
	2.07379	2.13626	6.74894	2.85561				-0.996917	-1.89079	-2.0782	-1.37034
	2.11495	2.12775	6.75173	2.90495				-1.01686	-1.87334	-2.03427	-1.29718
	2.14357	2.04584	6.76401	2.96216				-1.01902	-1.88489	-2.06322	-1.30164
	2.14614	1.97367	6.75006	2.93723				-1.00726	-1.85189	-2.08581	-1.39444
	2.16009	1.91875	6.73718	2.83071				-0.982678	-1.85278	-2.07025	-1.55437
	2.18989	1.83881	6.78249	2.72129				-0.954997	-1.87366	-2.05303	-1.6619
	2.20476	1.82643	6.86147	2.6557				-0.953297	-1.8178	-2.01382	-1.65534
	2.20924	1.90221	6.93539	2.6504				-0.965596	-1.75937	-1.97468	-1.57839
	2.21286	1.93834	7.01514	2.71364				-0.965661	-1.8078	-2.01078	-1.45689
	2.19916	1.89534	7.09145	2.7616				-0.968858	-1.86035	-2.10005	-1.26965
	2.17674	1.8917	7.13203	2.72879				-0.991665	-1.82928	-2.10608	-1.0969
	2.17013	1.93644	7.13659	2.69291				-1.03159	-1.81079	-2.04301	-1.04627
	2.16809	1.95208	7.11674	2.7452				-1.07498	-1.83177	-2.01943	-1.08266
	2.15081	1.97683	7.05946	2.84766				-1.10842	-1.81822	-2.0128	-1.15607
	2.13809	2.04356	6.9833	2.91592				-1.10633	-1.82322	-1.9642	-1.27777
	2.14674	2.06132	6.9595	2.95315				-1.07326	-1.91306	-1.90272	-1.38671
	2.15643	2.00559	6.99641	2.97227				-1.05083	-1.96814	-1.84339	-1.4271
	2.1503	1.98014	7.05531	2.95763				-1.05866	-1.93463	-1.76515	-1.49895
	2.15149	1.94503	7.10066	2.9654				-1.07177	-1.93877	-1.76731	-1.66389
	2.17309	1.82549	7.13264	3.05022				-1.06169	-1.98781	-1.89732	-1.79424
	2.19278	1.72949	7.12323	3.13055				-1.03499	-1.9741	-2.0333	-1.79508
	2.21337	1.73417	7.075	3.12925				-0.998194	-1.9508	-2.08735	-1.68429
	2.24467	1.77597	7.05627	3.06856				-0.963988	-1.99592	-2.0909	-1.52355
	2.26	1.84712	7.07751	2.96425				-0.953983	-2.01221	-2.0522	-1.41275
	2.25084	1.99114	7.10189	2.84482				-0.964635	-1.982	-1.96719	-1.44127
	2.25029	2.09774	7.13269	2.82968				-0.965391	-2.0114	-1.9042	-1.54518
	2.25569	2.08527	7.17223	2.9135				-0.944764	-2.05585	-1.90002	-1.56739
	2.24573	2.06984	7.16044	2.97691				-0.92251	-2.00962	-1.87184	-1.51688
	2.24264	2.12284	7.09892	2.95676				-0.899463	-1.94749	-1.7911	-1.53351
	2.26146	2.15566	7.04985	2.89151				-0.879575	-1.94375	-1.74031	-1.64397
	2.27396	2.14055	7.02817	2.8104				-0.875315	-1.90019	-1.76913	-1.69376
	2.27005	2.15598	7.04011	2.77915				-0.885791	-1.81464	-1.80529	-1.6002
	2.27279	2.16004	7.08962	2.85959				-0.895479	-1.81397	-1.83608	-1.38919
	2.2768	2.1047	7.12727	3.0203				-0.896843	-1.872	-1.8688	-1.12457
	2.26076	2.07188	7.10779	3.16463				-0.89313	-1.88754	-1.85959	-0.942056
	2.25098	2.07671	7.07741	3.2627				-0.875036	-1.92601	-1.81597	-0.934623
	2.2665	2.00636	7.11597	3.35035				-0.841742	-2.02279	-1.82799	-0.9771
	2.27876	1.89619	7.22734	3.42079				-0.847435	-2.0495	-1.85897	-0.968339
	2.28419	1.86302	7.35781	3.43619				-0.820242	-2.00462	-1.80874	-0.964116
	2.31892	1.84153	7.44477	3.42867				-0.810345	-2.00452	-1.73432	-0.997063
	2.35806	1.79428	7.47205	3.41614				-0.818882	-2.0007	-1.70844	-0.996788
	2.35527	1.82417	7.45342	3.37447				-0.842242	-1.92319	-1.68393	-0.972316
	2.33807	1.92604	7.45249	3.33453				-0.859726	-1.90126	-1.64039	-0.978431
	2.32761	1.97429	7.51994	3.3335				-0.866288	-1.97439	-1.61384	-0.992314
	2.29508	1.99448	7.60265	3.33259				-0.874424	-2.00376	-1.55163	-0.983329
	2.25225	2.06047	7.60311	3.31459				-0.876234	-1.99806	-1.41883	-0.960207
	2.23003	2.09493	7.53268	3.33612				-0.85074	-2.05872	-1.3071	-0.887404
	2.20597	2.06698	7.46971	3.37292				-0.821943	-2.12181	-1.27568	-0.749419
	2.17763	2.0683	7.46013	3.36584				-0.826262	-2.11086	-1.25027	-0.623903
	2.17937	2.1019	7.50631	3.33465				-0.863487	-2.12247	-1.20264	-0.57459
	2.19896	2.07962	7.54994	3.34815				-0.918468	-2.1809	-1.18634	-0.525972
	2.20242	2.04666	7.51122	3.40309				-0.982095	-2.18335	-1.18775	-0.419997
	2.21059	2.06531	7.40865	3.4918				-1.0314	-2.16151	-1.17113	-0.300134
	2.25028	2.05132	7.36584	3.60326				-1.03188	-2.20951	-1.20976	-0.255949
	2.29582	1.98926	7.43919	3.70378				-0.995942	-2.25224	-1.294	-0.286191
	2.32184	2.00408	7.54479	3.73936				-0.963111	-2.22753	-1.2957	-0.39254
	2.34122	2.0883	7.5827	3.73443				-0.951514	-2.25139	-1.21533	-0.511757
	2.34856	2.11071	7.5443	3.73102				-0.9563	-2.32729	-1.22614	-0.490128
	2.32458	2.11891	7.48553	3.70711				-0.984428	-2.32868	-1.20481	-0.326236
	2.29851	2.1817	7.45682	3.69137				-1.02514	-2.29293	-1.18786	-0.175704
	2.30479	2.21325	7.47489	3.70428				-1.05101	-2.30435	-1.22355	-0.103827
	2.31635	2.19092	7.48828	3.72441				-1.07254	-2.27859	-1.27664	-0.0714268
	2.31643	2.18771	7.43716	3.67659				-1.09751	-2.2012	-1.25059	-0.0816778
	2.32674	2.14418	7.38357	3.58126				-1.10155	-2.21976	-1.18571	-0.118387
	2.33554	1.99476	7.41248	3.5082				-1.07711	-2.3158	-1.14992	-0.113993
	2.317	1.87413	7.47945	3.47307				-1.06187	-2.33878	-1.08981	-0.0677606
	2.29871	1.87169	7.44923	3.49307				-1.06571	-2.30061	-0.990708	-0.044501
	2.29874	1.90453	7.4017	3.57918				-1.07137	-2.27543	-0.934449	-0.0517112
	2.29928	1.93675	7.3108	3.65103				-1.08094	-2.20466	-0.936037	-0.0817048
	2.30912	2.0273	7.25307	3.63864				-1.09115	-2.09014	-0.924101	-0.15647
	2.34255	2.11412	7.29874	3.59753				-1.10001	-2.05851	-0.93968	-0.253886
	2.37006	2.10614	7.40934	3.61648				-1.124	-2.09138	-1.0532	-0.275863
	2.36145	2.08144	7.46312	3.69972				-1.17345	-2.10251	-1.1957	-0.242029
	2.34042	2.08336	7.42442	3.82844				-1.21247	-2.16753	-1.30712	-0.251649
	2.33574	2.02415	7.3651	3.97557				-1.21067	-2.33781	-1.43087	-0.279635
	2.33677	1.92668	7.33662	4.06993				-1.20911	-2.47691	-1.54904	-0.257875
	2.32427	1.91635	7.34934	4.03306				-1.20064	-2.52976	-1.60251	-0.235506
	2.30521	1.94202	7.39287	3.93555				-1.17948	-2.59209	-1.62223	-0.240745
	2.28644	1.91883	7.42652	3.86545				-1.13624	-2.62387	-1.62323	-0.210851
	2.27476	1.92379	7.38267	3.81922				-1.09751	-2.53983	-1.53624	-0.144242
	2.30362	1.95732	7.26042	3.77097				-1.08039	-2.45174	-1.41037	-0.0680989
	2.37214	1.91503	7.15263	3.74477				-1.09563	-2.45607	-1.34536	0.00356488
	2.41806	1.83147	7.0984	3.7063				-1.14531	-2.46365	-1.3364	0.0255528
	2.41669	1.81884	7.06839	3.65647				-1.19783	-2.47339	-1.31066	-0.0744452
	2.40458	1.82986	7.05432	3.65486				-1.21917	-2.56568	-1.31187	-0.251178
	2.39703	1.8293	7.05127	3.68821				-1.21151	-2.66618	-1.37348	-0.369792
	2.38866	1.89634	7.03224	3.68521				-1.19976	-2.67644	-1.44408	-0.382729
	2.39805	2.001	7.01536	3.66864				-1.18235	-2.66718	-1.4969	-0.353531
	2.41702	2.02331	7.0102	3.68149				-1.16086	-2.68355	-1.56815	-0.285173
	2.4185	2.00335	6.95106	3.68385				-1.1476	-2.6409	-1.64935	-0.164061
	2.41728	2.04901	6.84474	3.62762				-1.14716	-2.57753	-1.70891	-0.0652533
	2.45127	2.09156	6.7584	3.56062				-1.16266	-2.61355	-1.79583	-0.0455124
	2.50456	2.07837	6.72414	3.54131				-1.20261	-2.69546	-1.90954	-0.0442185
	2.53389	2.097	6.7132	3.56382				-1.2583	-2.7297	-1.93825	-0.120447
	2.54775	2.14077	6.71053	3.59547				-1.29189	-2.78707	-1.86933	-0.196664
	2.55755	2.1155	6.71478	3.6051				-1.29016	-2.87605	-1.81091	-0.292016
	2.53901	2.0776	6.72616	3.5608				-1.2779	-2.85749	-1.77489	-0.417582
	2.50532	2.11051	6.7648	3.4804				-1.27363	-2.74843	-1.71818	-0.626302
	2.50191	2.12889	6.84058	3.47328				-1.26568	-2.66649	-1.68365	-0.833888
	2.5057	2.11904	6.92103	3.54842				-1.25072	-2.5641	-1.68892	-0.906258
	2.48445	2.1867	6.94764	3.58135				-1.23764	-2.40351	-1.69659	-0.848816
	2.47335	2.29355	6.91307	3.62533				-1.2208	-2.33361	-1.76207	-0.751566
	2.48203	2.32414	6.86199	3.66918				-1.20438	-2.39704	-1.92809	-0.649405
	2.47751	2.33104	6.80264	3.68445				-1.20657	-2.46624	-2.09554	-0.565543
	2.47223	2.3815	6.73674	3.67474				-1.23084	-2.52778	-2.16507	-0.546704
	2.4835	2.40034	6.7015	3.69282				-1.25607	-2.61702	-2.19368	-0.557294
	2.48438	2.38656	6.70566	3.71497				-1.27686	-2.64136	-2.22211	-0.526479
	2.48074	2.41345	6.71522	3.66082				-1.29353	-2.56323	-2.21019	-0.508045
	2.5097	2.43406	6.7166	3.57575				-1.2932	-2.51918	-2.16198	-0.554033
	2.54601	2.37768	6.69935	3.51843				-1.28953	-2.52119	-2.15381	-0.623518
	2.54842	2.33954	6.64288	3.48				-1.30405	-2.45021	-2.16413	-0.674319
	2.53154	2.37394	6.58198	3.44135				-1.33029	-2.35527	-2.17099	-0.739474
	2.52544	2.37006	6.58602	3.42255				-1.33327	-2.34336	-2.23213	-0.786319
	2.52429	2.30051	6.65616	3.41472				-1.31607	-2.3508	-2.32316	-0.761445
	2.5287	2.27442	6.71749	3.40935				-1.30532	-2.33839	-2.32576	-0.742101
	2.55491	2.2917	6.72677	3.43021				-1.30729	-2.40751	-2.26664	-0.777484
	2.58168	2.2814	6.70802	3.46587				-1.31854	-2.50451	-2.24589	-0.799746
	2.5743	2.3041	6.70471	3.44377				-1.34679	-2.4898	-2.24137	-0.813426
	2.5565	2.36967	6.73317	3.372				-1.42615	-2.43112	-2.22942	-0.891108
	2.56023	2.37344	6.81417	3.34876				-1.42606	-2.42318	-2.24654	-0.978505
	2.56259	2.33288	6.90895	3.38787				-1.41483	-2.38509	-2.2509	-1.01208
	2.55509	2.34206	6.95176	3.42339				-1.41672	-2.30612	-2.1832	-1.01431
	2.5591	2.3596	6.9447	3.46252				-1.42323	-2.31135	-2.13783	-1.00314
	2.56321	2.32688	6.92044	3.53717				-1.43056	-2.35464	-2.20861	-0.91096
	2.55176	2.35117	6.86263	3.60907				-1.45006	-2.31432	-2.36334	-0.739434
	2.55618	2.48267	6.77604	3.69153				-1.46468	-2.25831	-2.41752	-0.578922
	2.5872	2.6094	6.72344	3.79487				-1.4518	-2.26003	-2.4232	-0.4618
	2.61703	2.67579	6.7132	3.84611				-1.43009	-2.22948	-2.38704	-0.418728
	2.64556	2.7106	6.71252	3.78063				-1.41332	-2.163	-2.31193	-0.494085
	2.68965	2.65982	6.73094	3.67949				-1.40425	-2.17845	-2.27426	-0.626877
	2.72523	2.50662	6.7617	3.62181				-1.40789	-2.22629	-2.3164	-0.664121
	2.71574	2.41071	6.76998	3.62343				-1.43348	-2.21527	-2.33293	-0.602671
	2.6743	2.42371	6.76859	3.67437				-1.46455	-2.23425	-2.31426	-0.565056
	2.63299	2.4378	6.80465	3.74806				-1.48176	-2.3185	-2.33811	-0.575852
	2.59807	2.44495	6.84488	3.75673				-1.48547	-2.32817	-2.39501	-0.59675
	2.58097	2.52805	6.84708	3.69668				-1.46702	-2.27034	-2.41655	-0.627017
	2.59551	2.61404	6.84924	3.65473				-1.42383	-2.28177	-2.43574	-0.621831
	2.60925	2.62638	6.88652	3.65514				-1.38192	-2.30569	-2.4418	-0.531768
	2.58801	2.65488	6.90781	3.63162				-1.37266	-2.25629	-2.36148	-0.430221
	2.56742	2.70297	6.86408	3.5955				-1.3787	-2.23216	-2.24721	-0.400429
	2.57072	2.6742	6.78222	3.60228				-1.37988	-2.2669	-2.21254	-0.383455
	2.56865	2.60328	6.67032	3.64322				-1.38386	-2.26281	-2.25515	-0.347201
	2.55876	2.58473	6.5717	3.67144				-1.38937	-2.25556	-2.27337	-0.35526
	2.56294	2.56774	6.55304	3.71183				-1.38743	-2.3195	-2.29799	-0.442665
	2.56295	2.5314	6.606	3.6758				-1.37269	-2.34697	-2.32746	-0.531053
	2.54877	2.56763	6.65553	3.52516				-1.34877	-2.27068	-2.33797	-0.563201
	2.56035	2.63092	6.70347	3.34676				-1.31766	-2.21579	-2.37106	-0.552441
	2.60253	2.60176	6.77769	3.24662				-1.29866	-2.22471	-2.46021	-0.523093
	2.63197	2.53125	6.81706	3.26389				-1.30607	-2.1909	-2.53444	-0.545891
	2.63973	2.51421	6.76843	3.36769				-1.32097	-2.13825	-2.52552	-0.701982
	2.64942	2.48044	6.65367	3.49676				-1.322	-2.14954	-2.49458	-0.867735
	2.65765	2.41634	6.52439	3.55986				-1.31764	-2.14436	-2.48424	-0.846483
	2.65719	2.4358	6.45405	3.55244				-1.32974	-2.08731	-2.4351	-0.667701
	2.67129	2.50782	6.49953	3.55371				-1.35313	-2.10017	-2.38353	-0.523447
	2.68686	2.52121	6.63877	3.62982				-1.38605	-2.16937	-2.4123	-0.496389
	2.65947	2.54058	6.78253	3.71347				-1.43107	-2.16234	-2.48139	-0.561299
	2.61304	2.63536	6.89392	3.73009				-1.47127	-2.13824	-2.51024	-0.661278
	2.59988	2.68502	6.99352	3.70223				-1.48226	-2.18928	-2.52448	-0.682582
	2.60342	2.66721	7.08021	3.6963				-1.47833	-2.23134	-2.51051	-0.596172
	2.60047	2.68762	7.09761	3.70572				-1.48062	-2.22093	-2.44403	-0.520478
	2.61637	2.73168	7.02333	3.72562				-1.50995	-2.25458	-2.40918	-0.548416
	2.6401	2.73893	6.88276	3.73788				-1.47282	-2.31535	-2.48481	-0.618413
	2.648	2.78322	6.71104	3.70015				-1.44762	-2.30145	-2.58309	-0.666201
	2.66903	2.89559	6.59048	3.62753				-1.44755	-2.25965	-2.61255	-0.698818
	2.71455	2.95849	6.57992	3.61186				-1.45497	-2.23125	-2.60783	-0.775679
	2.74155	2.96108	6.61513	3.65927				-1.45835	-2.12376	-2.5926	-0.814397
	2.74393	2.98343	6.5996	3.72457				-1.45096	-1.95294	-2.53342	-0.810303
	2.75311	2.97949	6.56064	3.80355				-1.43344	-1.8947	-2.46165	-0.834484
	2.76329	2.88821	6.56869	3.88041				-1.43423	-1.95968	-2.41917	-0.839392
	2.76036	2.81439	6.6577	3.88482				-1.47372	-2.0307	-2.34939	-0.75817
	2.76095	2.81141	6.80465	3.81763				-1.52053	-2.1364	-2.25396	-0.716982
	2.76906	2.78806	6.93831	3.75829				-1.52586	-2.28468	-2.2537	-0.704379
	2.7655	2.77073	6.98177	3.70542				-1.50416	-2.334	-2.35673	-0.638682
	2.76291	2.8531	6.94835	3.60938				-1.49064	-2.25869	-2.46226	-0.545615
	2.79219	2.97766	6.91774	3.50259				-1.48623	-2.19979	-2.5597	-0.466193
	2.82707	3.04864	6.92615	3.44874				-1.48091	-2.16545	-2.66015	-0.377591
	2.81675	3.11939	6.92837	3.4257				-1.47175	-2.09556	-2.68093	-0.358095
	2.776	3.18338	6.8834	3.423				-1.44476	-2.07332	-2.62274	-0.471821
	2.74203	3.13527	6.8301	3.45224				-1.39315	-2.12084	-2.57632	-0.600769
	2.71333	3.0395	6.81822	3.48802				-1.35569	-2.1231	-2.525	-0.626805
	2.6952	3.02787	6.8469	3.49353				-1.34951	-2.08789	-2.44015	-0.589074
	2.70161	3.05665	6.8964	3.54082				-1.35974	-2.13023	-2.40201	-0.549426
	2.70895	3.04689	6.90928	3.64588				-1.37494	-2.18544	-2.46537	-0.49375
	2.70125	3.06415	6.83357	3.74246				-1.39386	-2.15611	-2.54427	-0.429936
	2.70193	3.11388	6.71454	3.80898				-1.40709	-2.13523	-2.58683	-0.390032
	2.70811	3.12324	6.66133	3.86716				-1.41389	-2.18219	-2.61036	-0.343948
	2.68857	3.12695	6.68073	3.89524				-1.43524	-2.20752	-2.59475	-0.295987
	2.65961	3.17611	6.72349	3.82549				-1.46092	-2.22397	-2.53137	-0.356532
	2.65686	3.17547	6.77153	3.72226				-1.47215	-2.32753	-2.51546	-0.527385
	2.67219	3.08456	6.80551	3.64961				-1.47118	-2.42879	-2.5758	-0.666612
	2.66759	3.05102	6.81995	3.59436				-1.47265	-2.4313	-2.60207	-0.727218
	2.63741	3.1208	6.83527	3.58823				-1.46815	-2.44661	-2.56053	-0.765388
	2.59702	3.20566	6.87055	3.64191				-1.44785	-2.52281	-2.51883	-0.776254
	2.55384	3.29619	6.87481	3.68626				-1.42496	-2.545	-2.48275	-0.785155
	2.53345	3.40608	6.82469	3.67821				-1.40481	-2.52901	-2.454	-0.845184
	2.55695	3.42953	6.77177	3.67837				-1.39613	-2.55624	-2.49742	-0.911497
	2.59019	3.34875	6.76937	3.70626				-1.4112	-2.53465	-2.59373	-0.898908
	2.59615	3.30291	6.80261	3.73999				-1.44674	-2.43165	-2.64907	-0.863907
	2.59743	3.28857	6.8321	3.82263				-1.47494	-2.40545	-2.70282	-0.862313
	2.59773	3.20982	6.82881	3.94257				-1.48568	-2.48171	-2.83686	-0.841493
	2.56383	3.12466	6.76341	3.99755				-1.49819	-2.51586	-2.91191	-0.779005
	2.51643	3.13448	6.6859	3.95157				-1.52064	-2.51212	-2.85763	-0.742889
	2.50131	3.17741	6.69184	3.89553				-1.55029	-2.54804	-2.73175	-0.754609
	2.50264	3.2114	6.76605	3.86085				-1.57007	-2.54971	-2.61421	-0.781587
	2.49171	3.29485	6.82771	3.82999				-1.56122	-2.49242	-2.52006	-0.849207
	2.48554	3.36024	6.85469	3.82888				-1.5149	-2.49016	-2.49687	-1.00534
	2.48707	3.31896	6.87728	3.8354				-1.45683	-2.53165	-2.5478	-1.19916
	2.4759	3.26057	6.89872	3.801				-1.42212	-2.51172	-2.58067	-1.35665
	2.46391	3.27598	6.93816	3.75463				-1.41288	-2.51301	-2.53203	-1.45384
	2.46465	3.27009	6.98179	3.74177				-1.40925	-2.61516	-2.43477	-1.4253
	2.46084	3.21949	6.97463	3.76317				-1.40424	-2.68188	-2.36444	-1.228
	2.45642	3.21824	6.9039	3.78086				-1.40369	-2.64977	-2.29647	-0.992408
	2.49437	3.23006	6.83703	3.79381				-1.39595	-2.6472	-2.28037	-0.849292
	2.56266	3.18509	6.83087	3.79925				-1.38042	-2.67963	-2.35248	-0.763859
	2.60347	3.15929	6.85994	3.81364				-1.36849	-2.65708	-2.41752	-0.743936
	2.60616	3.1859	6.89336	3.87306				-1.36068	-2.66141	-2.43597	-0.821462
	2.5789	3.15938	6.93284	4.01804				-1.35578	-2.75154	-2.47752	-0.917641
	2.50054	3.11431	6.97901	4.17259				-1.36908	-2.80981	-2.53846	-0.948
	2.40076	3.16794	7.01392	4.24996				-1.40493	-2.81247	-2.55801	-0.943298
	2.35429	3.25602	7.0609	4.26305				-1.43191	-2.86193	-2.59032	-0.930249
	2.36002	3.2755	7.14267	4.23608				-1.43586	-2.91437	-2.67295	-0.942554
	2.37552	3.29004	7.21472	4.13583				-1.42699	-2.87231	-2.72587	-0.89886
	2.40202	3.32989	7.23354	3.9749				-1.41202	-2.81873	-2.70148	-0.863498
	2.42924	3.3016	7.22679	3.84453				-1.39	-2.8087	-2.65146	-0.797011
	2.42227	3.24695	7.20508	3.80655				-1.37942	-2.74156	-2.58927	-0.725799
	2.39393	3.27191	7.15017	3.87712				-1.39087	-2.63253	-2.516	-0.756764
	2.37787	3.3072	7.07643	4.01336				-1.40053	-2.61817	-2.49026	-0.886594
	2.36351	3.25692	6.98363	4.10937				-1.39686	-2.6559	-2.55798	-0.955233
	2.34243	3.2001	6.86775	4.06762				-1.3921	-2.64462	-2.62933	-0.928863
	2.33645	3.17628	6.79667	3.95073				-1.38951	-2.67381	-2.665	-0.909801
	2.34169	3.11528	6.80945	3.90509				-1.37758	-2.77152	-2.72959	-0.912783
	2.32878	3.06898	6.84219	3.96672				-1.36856	-2.80795	-2.77994	-0.916198
	2.3079	3.0895	6.83114	4.04874				-1.35891	-2.77512	-2.75317	-0.93039
	2.31545	3.07936	6.82094	4.10038				-1.33425	-2.77751	-2.71841	-0.887665
	2.33968	3.00482	6.86629	4.09904				-1.35935	-2.77024	-2.73609	-0.726312
	2.35064	3.0115	6.9588	4.049				-1.35209	-2.70926	-2.73402	-0.549904
	2.3589	3.119	7.05335	4.00695				-1.34289	-2.69871	-2.71028	-0.48557
	2.372	3.19417	7.12148	4.05155				-1.30744	-2.74077	-2.70225	-0.519774
	2.37748	3.2365	7.10977	4.13733				-1.26591	-2.7119	-2.65961	-0.574562
	2.39908	3.29623	7.00256	4.18958				-1.23773	-2.63975	-2.55119	-0.606069
	2.45202	3.30097	6.88606	4.2042				-1.22654	-2.63864	-2.4689	-0.577095
	2.49019	3.23282	6.81426	4.20094				-1.23323	-2.64405	-2.45064	-0.490582
	2.47685	3.20761	6.76595	4.1627				-1.24397	-2.59584	-2.42872	-0.445602
	2.44101	3.20278	6.72913	4.13173				-1.23776	-2.60211	-2.40403	-0.51868
	2.40925	3.12359	6.72061	4.14605				-1.21475	-2.66926	-2.4205	-0.612827
	2.38074	3.03912	6.71182	4.16609				-1.20503	-2.67015	-2.44036	-0.635573
	2.36308	3.03334	6.71411	4.14468				-1.20677	-2.63331	-2.45151	-0.626722
	2.35462	3.04048	6.76764	4.1093				-1.20304	-2.67223	-2.50878	-0.629032
	2.33696	3.03089	6.82057	4.0634				-1.22365	-2.72164	-2.59169	-0.598637
	2.30959	3.08629	6.79214	3.98074				-1.22365	-2.71951	-2.594	-0.559053
	2.29993	3.15975	6.69573	3.90651				-1.20851	-2.74891	-2.55137	-0.545733
	2.31594	3.16126	6.6133	3.88836				-1.18703	-2.78768	-2.56364	-0.519893
	2.33266	3.16268	6.59736	3.90123				-1.18414	-2.73575	-2.61296	-0.496551
	2.35613	3.22359	6.64861	3.91089				-1.18813	-2.6774	-2.66125	-0.53325
	2.40925	3.24376	6.73214	3.96888				-1.18779	-2.71369	-2.71048	-0.543918
	2.4651	3.20287	6.78028	4.06839				-1.19157	-2.73601	-2.69918	-0.425139
	2.48959	3.22988	6.77475	4.16683				-1.20895	-2.69285	-2.55975	-0.240572
	2.50055	3.3141	6.75615	4.25869				-1.22915	-2.68425	-2.39892	-0.114904
	2.50462	3.36659	6.76033	4.33896				-1.24406	-2.70748	-2.33087	-0.066789
	2.48225	3.40734	6.7425	4.32633				-1.25241	-2.67024	-2.34549	-0.0807909
	2.45913	3.43448	6.70301	4.22557				-1.23843	-2.62218	-2.39419	-0.155236
	2.46179	3.36101	6.70011	4.12003				-1.2042	-2.6141	-2.47209	-0.232759
	2.46234	3.25964	6.73883	4.04997				-1.17606	-2.5515	-2.53536	-0.305263
	2.44538	3.28639	6.78497	4.00019				-1.17674	-2.44715	-2.54032	-0.353347
	2.44311	3.37851	6.82462	4.0036				-1.19562	-2.45257	-2.54491	-0.491175
	2.45029	3.41815	6.84256	4.04514				-1.21739	-2.52609	-2.60544	-0.603153
	2.43879	3.44782	6.80979	4.06921				-1.24403	-2.49714	-2.64925	-0.616631
	2.42791	3.50206	6.7597	4.05862				-1.273	-2.40068	-2.63651	-0.609608
	2.43827	3.49806	6.73003	4.08379				-1.29893	-2.32894	-2.6069	-0.617957
	2.44932	3.46074	6.71611	4.15336				-1.3233	-2.2395	-2.6042	-0.596963
	2.45662	3.47553	6.71218	4.21701				-1.34387	-2.16758	-2.59254	-0.589863
	2.49219	3.47459	6.72512	4.24878				-1.33849	-2.21128	-2.61142	-0.599296
	2.54286	3.41566	6.73352	4.22542				-1.312	-2.28111	-2.66145	-0.56109
	2.56556	3.41208	6.71096	4.13316				-1.28564	-2.24736	-2.64484	-0.534036
	2.58014	3.49929	6.65585	4.06938				-1.26078	-2.19783	-2.55989	-0.584869
	2.60831	3.5517	6.58592	4.1388				-1.23393	-2.20229	-2.52048	-0.633965
	2.62067	3.56758	6.49926	4.26016				-1.22299	-2.16826	-2.52946	-0.595057
	2.62151	3.6199	6.39579	4.30793				-1.24205	-2.10391	-2.5185	-0.499768
	2.63938	3.64995	6.31369	4.29304				-1.27159	-2.10479	-2.51088	-0.414318
	2.64333	3.62422	6.29104	4.2803				-1.29719	-2.10294	-2.52598	-0.356755
	2.60886	3.63895	6.30391	4.27778				-1.30714	-2.01579	-2.51844	-0.404807
	2.57561	3.69445	6.3421	4.30089				-1.28644	-1.96557	-2.49811	-0.590515
	2.55599	3.67641	6.40914	4.32648				-1.234	-2.00522	-2.53744	-0.763005
	2.52481	3.63182	6.47498	4.29794				-1.18886	-2.01416	-2.60054	-0.777839
	2.49534	3.66564	6.50485	4.21868				-1.18508	-1.97955	-2.6103	-0.679481
	2.49404	3.71652	6.52126	4.1912				-1.21121	-1.99058	-2.59432	-0.555501
	2.50571	3.71	6.51839	4.23702				-1.25457	-1.97913	-2.59127	-0.437287
	2.51763	3.69248	6.45987	4.29305				-1.31162	-1.89223	-2.54964	-0.413694
	2.54591	3.64354	6.36494	4.31221				-1.35703	-1.86851	-2.50172	-0.532177
	2.58989	3.50859	6.3058	4.31369				-1.36425	-1.92576	-2.51644	-0.660439
	2.62384	3.41445	6.30785	4.28833				-1.35304	-1.92812	-2.52433	-0.730393
	2.65335	3.46868	6.34304	4.27801				-1.33455	-1.90882	-2.45831	-0.828408
	2.69518	3.56978	6.38943	4.33794				-1.29369	-1.97377	-2.40654	-0.964733
	2.71993	3.61688	6.42129	4.44075				-1.24752	-2.04274	-2.41305	-0.983424
	2.70468	3.67132	6.41818	4.49151				-1.22715	-2.0471	-2.42419	-0.908544
	2.68491	3.7362	6.39355	4.50887				-1.23889	-2.07297	-2.45928	-0.770101
	2.68169	3.7443	6.38418	4.55503				-1.26748	-2.10453	-2.54166	-0.586404
	2.68443	3.7603	6.35818	4.61949				-1.3026	-2.04776	-2.5824	-0.454927
	2.71245	3.82515	6.28893	4.66706				-1.31099	-1.97985	-2.55422	-0.43189
	2.76513	3.82897	6.24356	4.67443				-1.28441	-2.00085	-2.5327	-0.432837
	2.78363	3.75307	6.25963	4.592				-1.2657	-2.00838	-2.53574	-0.357099
	2.74483	3.74066	6.29703	4.41647				-1.27694	-1.94117	-2.49512	-0.262421
	2.69715	3.78583	6.34455	4.24834				-1.2956	-1.92073	-2.43502	-0.223723
	2.67794	3.78676	6.40497	4.13778				-1.29942	-1.94982	-2.41643	-0.203373
	2.68473	3.78192	6.42483	4.04878				-1.30177	-1.92138	-2.41407	-0.17549
	2.71661	3.81127	6.38213	3.95876				-1.30354	-1.88681	-2.42034	-0.19525
	2.75501	3.81152	6.32248	3.91024				-1.3034	-1.91493	-2.48323	-0.27608
	2.75654	3.80325	6.24156	3.89471				-1.30851	-1.89956	-2.57321	-0.375175
	2.71462	3.88162	6.15172	3.86776				-1.31097	-1.82556	-2.59525	-0.48448
	2.67826	3.95271	6.0939	3.81322				-1.28734	-1.82138	-2.5848	-0.579195
	2.67781	3.89202	6.08477	3.76332				-1.23681	-1.85332	-2.62591	-0.577274
	2.69251	3.7947	6.09291	3.7427				-1.18819	-1.81485	-2.5699	-0.51038
	2.71586	3.76636	6.12188	3.80868				-1.1478	-1.79114	-2.49221	-0.470389
	2.74706	3.75296	6.19008	3.96566				-1.12091	-1.84724	-2.48551	-0.454753
	2.75731	3.74795	6.25504	4.10313				-1.12201	-1.8658	-2.52609	-0.41467
	2.74058	3.81109	6.25624	4.08925				-1.14428	-1.8244	-2.53937	-0.37029
	2.73676	3.85317	6.19392	3.98064				-1.16301	-1.8227	-2.55086	-0.345768
	2.74532	3.82212	6.11862	3.90397				-1.17118	-1.82082	-2.59598	-0.301009
	2.74267	3.84101	6.05736	3.93941				-1.17969	-1.74776	-2.63079	-0.237013
	2.75343	3.94457	6.05095	4.06786				-1.18174	-1.71691	-2.63264	-0.186934
	2.7845	3.99505	6.11737	4.20554				-1.1788	-1.7854	-2.62045	-0.140325
	2.79046	3.97622	6.18788	4.23269				-1.18051	-1.81838	-2.5867	-0.0703581
	2.75894	3.98339	6.21821	4.14434				-1.19065	-1.79521	-2.50557	-0.00418631
	2.72806	3.96908	6.25486	4.05472				-1.19509	-1.81415	-2.4541	0.0456977
	2.71232	3.90373	6.30341	4.02693				-1.18923	-1.83215	-2.48036	0.113132
	2.71039	3.88312	6.30123	4.00597				-1.18206	-1.77992	-2.51206	0.153026
	2.74371	3.91001	6.24116	3.95174				-1.17095	-1.75587	-2.51019	0.0720688
	2.79818	3.89058	6.17231	3.91667				-1.15811	-1.78713	-2.53917	-0.056302
	2.81687	3.88254	6.1359	3.92795				-1.16061	-1.75242	-2.5879	-0.116875
	2.79777	3.96816	6.15738	3.96895				-1.17941	-1.69493	-2.5995	-0.120912
	2.79327	4.03189	6.1947	4.02649				-1.18295	-1.74522	-2.62119	-0.109788
	2.80525	4.01089	6.1802	4.06601				-1.16986	-1.84236	-2.65959	-0.082176
	2.80502	4.00831	6.1054	4.02816				-1.16231	-1.87433	-2.63051	-0.0903902
	2.80342	4.05933	6.05982	3.96808				-1.16404	-1.89038	-2.54288	-0.162909
	2.79566	4.09328	6.11175	3.96839				-1.17181	-1.90367	-2.47903	-0.208456
	2.75092	4.14872	6.21827	3.99644				-1.18218	-1.8488	-2.41049	-0.194108
	2.69386	4.25033	6.27453	3.95759				-1.17604	-1.79891	-2.30283	-0.19095
	2.67065	4.26667	6.23982	3.8783				-1.13319	-1.84297	-2.22058	-0.188498
	2.66173	4.16803	6.13234	3.81021				-1.08034	-1.85732	-2.19408	-0.138958
	2.64788	4.09254	5.99849	3.79702				-1.05983	-1.74907	-2.17117	-0.0626353
	2.64576	4.06246	5.91466	3.87682				-1.07003	-1.66437	-2.17447	-0.0327624
	2.64633	3.99211	5.91025	4.04742				-1.07415	-1.67388	-2.26535	-0.0221378
	2.63133	3.92083	5.92979	4.17992				-1.06496	-1.68212	-2.39942	0.0394498
	2.6259	3.87998	5.94257	4.20135				-1.06438	-1.70344	-2.49503	0.10829
	2.65317	3.79656	5.98411	4.17969				-1.07919	-1.77715	-2.58248	0.164283
	2.69037	3.70125	6.05179	4.1798				-1.11326	-1.7849	-2.67632	0.257326
	2.71916	3.72572	6.1058	4.14947				-1.15294	-1.68555	-2.71395	0.366779
	2.75388	3.84845	6.1256	4.08214				-1.16644	-1.63717	-2.72071	0.440596
	2.77722	3.93612	6.11063	4.01153				-1.14186	-1.66899	-2.76896	0.517897
	2.74377	3.9949	6.07299	3.92924				-1.11366	-1.66878	-2.80148	0.551197
	2.6678	4.0546	6.05196	3.84863				-1.09391	-1.66557	-2.7829	0.438331
	2.60559	4.05433	6.08427	3.83211				-1.07277	-1.72332	-2.76975	0.239874
	2.56848	4.01378	6.14938	3.84071				-1.07194	-1.75706	-2.74998	0.0853819
	2.55252	4.04298	6.17932	3.77901				-1.09911	-1.73832	-2.67002	-0.0487771
	2.57181	4.10348	6.14741	3.69041				-1.13489	-1.7724	-2.61844	-0.199805
	2.60256	4.10168	6.09165	3.63913				-1.16442	-1.82142	-2.66257	-0.318418
	2.60547	4.10441	6.03899	3.60545				-1.1929	-1.77716	-2.71954	-0.3998
	2.60104	4.14017	5.99597	3.59221				-1.20897	-1.72884	-2.73163	-0.462035
	2.60991	4.10854	6.01456	3.64608				-1.20558	-1.78951	-2.72888	-0.450664
	2.60773	4.01425	6.08335	3.70082				-1.20168	-1.85449	-2.72249	-0.342767
	2.59367	3.98672	6.14597	3.70183				-1.20861	-1.86153	-2.67473	-0.241206
	2.59559	4.00158	6.18496	3.71225				-1.22319	-1.89562	-2.62558	-0.219445
	2.61305	3.97419	6.21138	3.78378				-1.24206	-1.91998	-2.61863	-0.200185
	2.62777	3.96091	6.20486	3.8524				-1.26948	-1.85729	-2.60716	-0.13697
	2.6451	3.97896	6.1804	3.89478				-1.29003	-1.82093	-2.58245	-0.0859146
	2.65755	3.96696	6.18298	3.922				-1.29445	-1.8764	-2.62359	-0.0651529
	2.63631	3.96279	6.19454	3.93491				-1.29283	-1.88279	-2.71064	-0.047996
	2.58767	4.05175	6.1888	3.92705				-1.27729	-1.82144	-2.76168	-0.0544629
	2.56008	4.13563	6.18144	3.94689				-1.23327	-1.82311	-2.80586	-0.055697
	2.56499	4.1014	6.17284	3.95477				-1.17612	-1.85771	-2.86664	0.0387031
	2.56749	4.03452	6.12539	3.88178				-1.15259	-1.84513	-2.876	0.173087
	2.56537	4.00153	6.04626	3.76347				-1.17351	-1.862	-2.86421	0.239051
	2.56701	3.95291	5.98961	3.71178				-1.22649	-1.94143	-2.89896	0.253871
	2.55359	3.9273	5.96252	3.73017				-1.28595	-1.9601	-2.94255	0.270561
	2.54368	4.01409	5.93494	3.76875				-1.31448	-1.92923	-2.933	0.27386
	2.57707	4.11277	5.90097	3.78786				-1.29907	-1.97221	-2.91127	0.275089
	2.62483	4.12518	5.86445	3.72121				-1.26593	-2.03328	-2.87954	0.299913
	2.63683	4.13124	5.81297	3.55626				-1.24327	-2.01741	-2.78946	0.302738
	2.63868	4.15299	5.77474	3.40698				-1.22756	-2.00667	-2.68234	0.234202
	2.65433	4.11307	5.79892	3.37138				-1.20106	-2.04024	-2.65336	0.154312
	2.66397	4.06074	5.8491	3.42448				-1.16752	-2.01305	-2.68789	0.126946
	2.66932	4.06575	5.89947	3.51772				-1.13212	-1.96432	-2.68629	0.111809
	2.68185	4.0263	5.96807	3.60484				-1.09432	-1.99704	-2.66098	0.0499849
	2.674	3.92659	6.04138	3.6191				-1.06288	-2.02483	-2.63167	-0.0280915
	2.6325	3.91034	6.07197	3.51345				-1.04621	-1.96799	-2.58144	-0.108709
	2.60004	3.98028	6.08045	3.3517				-1.02575	-1.94228	-2.54469	-0.163861
	2.59478	3.99876	6.09563	3.24316				-0.993583	-1.98194	-2.59075	-0.0953671
	2.59133	3.97896	6.11005	3.24629				-0.976112	-1.97552	-2.66266	0.109524
	2.59151	3.99078	6.12389	3.33901				-0.994514	-1.94948	-2.69274	0.301128
	2.61371	3.96665	6.15198	3.49904				-1.03296	-1.97969	-2.73768	0.433735
	2.62971	3.90429	6.16801	3.63164				-1.07861	-1.97165	-2.80372	0.569075
	2.62308	3.90692	6.12138	3.64429				-1.11861	-1.87808	-2.79934	0.6995
	2.6272	3.95411	6.02099	3.54413				-1.12692	-1.84008	-2.75247	0.80765
	2.64259	3.96222	5.93777	3.43095				-1.10838	-1.88388	-2.74109	0.921615
	2.63685	4.00627	5.91399	3.33087				-1.09392	-1.88836	-2.74124	1.02505
	2.62895	4.12639	5.94366	3.25091				-1.09589	-1.87635	-2.69233	1.05866
	2.63857	4.18155	6.01283	3.19328				-1.09122	-1.92191	-2.6452	1.03235
	2.62631	4.13065	6.07293	3.14337				-1.07797	-1.94223	-2.58578	0.991225
	2.5756	4.0829	6.07322	3.07923				-1.07292	-1.89844	-2.49055	0.931736
	2.52266	4.04984	6.04205	3.04922				-1.08188	-1.90436	-2.43058	0.860081
	2.48817	3.99612	6.02081	3.08775				-1.10183	-1.94108	-2.48414	0.849733
	2.48776	4.02376	5.99156	3.16559				-1.13454	-1.90437	-2.55331	0.914811
	2.54259	4.14956	5.95902	3.2571				-1.16249	-1.86955	-2.53836	0.968566
	2.63183	4.23311	5.94859	3.38485				-1.15775	-1.90815	-2.49711	0.959172
	2.69556	4.24939	5.92976	3.52769				-1.14303	-1.91425	-2.49354	0.918019
	2.71402	4.28853	5.88547	3.59546				-1.14263	-1.85064	-2.50783	0.845007
	2.7237	4.32585	5.86739	3.57653				-1.13328	-1.83867	-2.57279	0.759752
	2.73992	4.29854	5.89029	3.52107				-1.09338	-1.8691	-2.68781	0.76601
	2.74433	4.28601	5.91494	3.45412				-1.04376	-1.8651	-2.7238	0.888159
	2.74268	4.30489	5.90742	3.40559				-0.996294	-1.88639	-2.674	1.01057
	2.74677	4.26177	5.8482	3.43914				-0.954257	-1.95781	-2.66574	1.08801
	2.73696	4.19432	5.79539	3.49926				-0.947793	-1.95253	-2.70906	1.10746
	2.71806	4.21587	5.76444	3.48022				-0.971859	-1.85967	-2.72252	1.03285
	2.7216	4.27321	5.77989	3.39927				-0.993007	-1.8288	-2.72529	0.906626
	2.73604	4.2772	5.82966	3.33721				-1.00251	-1.85764	-2.73408	0.84891
	2.73016	4.29737	5.84197	3.28775				-1.01664	-1.84394	-2.69781	0.865134
	2.72053	4.34752	5.80261	3.27386				-1.03169	-1.82744	-2.64275	0.887215
	2.72278	4.34384	5.78812	3.31024				-1.03645	-1.83795	-2.64075	0.90973
	2.72315	4.30156	5.80867	3.3245				-1.04089	-1.77457	-2.6823	0.942146
	2.72315	4.30385	5.82357	3.24666				-1.04516	-1.66731	-2.73789	0.955762
	2.73118	4.31405	5.8339	3.16915				-1.05062	-1.6629	-2.84125	0.963639
	2.73173	4.31671	5.8431	3.15772				-1.06749	-1.71797	-2.97048	1.07031
	2.71606	4.41773	5.84604	3.20926				-1.10551	-1.73206	-2.99611	1.27888
	2.71041	4.58134	5.87938	3.31149				-1.13766	-1.76224	-2.91579	1.45095
	2.72743	4.65593	5.95494	3.45309				-1.14506	-1.82128	-2.84848	1.52261
	2.7421	4.63268	5.98977	3.54823				-1.1459	-1.79661	-2.84877	1.51163
	2.74648	4.60437	5.94071	3.55045				-1.15006	-1.72978	-2.89119	1.42097
	2.76239	4.55571	5.86019	3.5243				-1.15141	-1.75713	-2.99973	1.32235
	2.78266	4.49494	5.81055	3.48584				-1.14879	-1.8138	-3.1134	1.32807
	2.77904	4.53531	5.82088	3.38163				-1.14947	-1.80048	-3.11011	1.39843
	2.76799	4.65061	5.88921	3.25001				-1.14627	-1.79547	-3.02429	1.4086
	2.76238	4.70866	5.98872	3.16571				-1.15141	-1.83763	-2.9732	1.36212
	2.74529	4.71852	6.03991	3.10701				-1.18074	-1.82388	-2.96711	1.30771
	2.7395	4.7565	6.00759	3.05792				-1.21187	-1.77162	-2.98273	1.23773
	2.78066	4.75521	5.92293	3.04851				-1.21679	-1.77381	-3.05647	1.1836
	2.83369	4.68783	5.83759	3.04282				-1.19715	-1.77336	-3.1588	1.19751
	2.84713	4.651	5.76092	2.97158				-1.17128	-1.72225	-3.24679	1.18427
	2.83558	4.63456	5.72646	2.90585				-1.13967	-1.72787	-3.24813	1.06944
	2.81229	4.56636	5.76821	2.91607				-1.10864	-1.78128	-3.2368	0.932082
	2.77296	4.52305	5.84601	2.96583				-1.09757	-1.74538	-3.17858	0.897058
	2.75093	4.57924	5.90823	2.98636				-1.11252	-1.6763	-3.05091	0.959961
	2.77144	4.62916	5.95601	2.97611				-1.13298	-1.69967	-2.96495	1.09023
	2.79668	4.63342	5.99622	2.94876				-1.14171	-1.73875	-2.9931	1.27256
	2.79778	4.67511	6.02406	2.9696				-1.14016	-1.72326	-3.04802	1.41683
	2.8049	4.72817	6.05588	3.08285				-1.12334	-1.74137	-3.0788	1.4669
	2.82852	4.70563	6.09307	3.24614				-1.10002	-1.78465	-3.09507	1.50776
	2.84158	4.67007	6.11003	3.3328				-1.08576	-1.74444	-3.05654	1.56141
	2.84518	4.68837	6.12906	3.33358				-1.07891	-1.68641	-2.96889	1.51177
	2.84661	4.67238	6.17916	3.3357				-1.06577	-1.70843	-2.95894	1.36532
	2.8172	4.62287	6.2328	3.34232				-1.06512	-1.72354	-3.02829	1.21878
	2.76362	4.64469	6.2362	3.32874				-1.09051	-1.68259	-3.06877	1.06852
	2.74779	4.70026	6.19177	3.27686				-1.11503	-1.69346	-3.10011	0.92034
	2.77683	4.69629	6.15344	3.23534				-1.11906	-1.7321	-3.19148	0.851628
	2.8131	4.69799	6.07331	3.19274				-1.11273	-1.68677	-3.27805	0.857417
	2.85051	4.74066	6.08661	3.1484				-1.10557	-1.63982	-3.31779	0.866731
	2.88023	4.71957	6.14479	3.13058				-1.0864	-1.66746	-3.33633	0.88762
	2.87286	4.65357	6.21928	3.12325				-1.05699	-1.64928	-3.31535	0.935065
	2.84662	4.65906	6.24682	3.11244				-1.05142	-1.53625	-3.22922	0.945847
	2.84352	4.7114	6.23853	3.11698				-1.00036	-1.45671	-3.15171	0.90033
	2.84794	4.73648	6.21996	3.102				-0.965534	-1.40596	-3.14993	0.863049
	2.83358	4.80055	6.18672	3.02508				-0.96692	-1.31612	-3.16306	0.868726
	2.82485	4.90485	6.1504	2.92645				-0.988338	-1.28731	-3.16316	0.854894
	2.84288	4.92124	6.16132	2.90032				-0.992864	-1.35664	-3.20803	0.844529
	2.86785	4.8586	6.19664	2.95356				-0.996902	-1.38529	-3.26096	0.903752
	2.88416	4.82757	6.20314	3.04687				-1.02054	-1.3556	-3.23836	1.01616
	2.89155	4.80116	6.18176	3.15908				-1.0468	-1.37724	-3.19779	1.1239
	2.87309	4.72041	6.14888	3.26706				-1.06721	-1.39064	-3.18993	1.20225
	2.82103	4.69238	6.11061	3.29029				-1.09216	-1.3093	-3.13619	1.19494
	2.77684	4.73778	6.10164	3.24546				-1.1114	-1.2618	-3.0518	1.09894
	2.7623	4.73861	6.16681	3.21219				-1.11302	-1.33801	-3.03739	1.02087
	2.74537	4.69578	6.28054	3.20198				-1.12134	-1.42368	-3.07086	1.00664
	2.71708	4.68736	6.37257	3.14874				-1.13276	-1.47669	-3.10398	0.993017
	2.69691	4.66192	6.41866	3.0684				-1.13072	-1.56257	-3.17294	0.967576
	2.67223	4.5931	6.41594	2.9697				-1.11924	-1.6025	-3.26566	0.978573
	2.63512	4.59235	6.36241	2.84248				-1.10736	-1.53481	-3.29494	1.00145
	2.61854	4.63926	6.30808	2.73378				-1.08555	-1.49684	-3.28208	0.97188
	2.63216	4.62727	6.33156	2.71221				-1.0529	-1.53478	-3.28271	0.910247
	2.64959	4.61784	6.38485	2.7601				-1.03105	-1.51414	-3.28921	0.858803
	2.64908	4.70907	6.38798	2.86452				-1.01948	-1.43894	-3.27704	0.80752
	2.69539	4.80472	6.35796	3.03329				-1.00939	-1.42051	-3.28352	0.741307
	2.73641	4.81308	6.30535	3.19218				-1.00802	-1.40608	-3.31039	0.71274
	2.76151	4.81005	6.20898	3.23988				-1.02977	-1.36217	-3.30299	0.754684
	2.79075	4.79777	6.10104	3.19652				-1.05749	-1.38811	-3.29327	0.821907
	2.82999	4.72092	6.04039	3.15297				-1.07045	-1.46723	-3.33004	0.926585
	2.85249	4.65268	6.00358	3.13439				-1.07261	-1.46086	-3.35167	1.06535
	2.85331	4.66028	5.98202	3.12853				-1.06166	-1.41577	-3.31064	1.15028
	2.85351	4.64491	5.96768	3.14545				-1.04846	-1.44477	-3.28976	1.14982
	2.84058	4.58252	5.91933	3.16466				-1.05408	-1.45775	-3.32823	1.15778
	2.79538	4.59732	5.81394	3.13857				-1.0763	-1.39248	-3.3722	1.1839
	2.75351	4.67215	5.7105	3.11666				-1.08537	-1.37077	-3.44077	1.15898
	2.7309	4.69567	5.67659	3.14102				-1.08253	-1.41744	-3.54782	1.08724
	2.70066	4.69315	5.69594	3.18343				-1.08871	-1.42503	-3.59897	0.989687
	2.68144	4.716	5.72892	3.21175				-1.09457	-1.42239	-3.5331	0.85585
	2.70525	4.69421	5.75146	3.26646				-1.08988	-1.46347	-3.4155	0.770041
	2.73884	4.65966	5.81638	3.29841				-1.0796	-1.4416	-3.31385	0.821186
	2.74825	4.73333	5.83285	3.25239				-1.07065	-1.34122	-3.2506	0.940794
	2.75148	4.84804	5.91848	3.18379				-1.05414	-1.31086	-3.2837	1.0078
	2.74413	4.88004	5.99214	3.18584				-1.03157	-1.35029	-3.41843	1.03514
	2.70795	4.87564	6.00909	3.24105				-1.01384	-1.34363	-3.55686	1.07108
	2.68148	4.88976	6.00467	3.30757				-1.0053	-1.33677	-3.6053	1.07912
	2.69843	4.84824	6.04712	3.3672				-1.00265	-1.37759	-3.6065	1.04519
	2.7293	4.78201	6.1339	3.40987				-1.01541	-1.37477	-3.59108	1.00717
	2.74506	4.79812	6.22457	3.43736				-1.05202	-1.33447	-3.52646	0.932859
	2.75634	4.84036	6.30467	3.49867				-1.09004	-1.37317	-3.46389	0.832555
	2.75291	4.81502	6.34753	3.58112				-1.11841	-1.44951	-3.47599	0.893809
	2.71901	4.79387	6.31289	3.58147				-1.14477	-1.43157	-3.48568	1.10951
	2.69621	4.83211	6.23083	3.46369				-1.16386	-1.38409	-3.43884	1.2881
	2.72295	4.84963	6.15937	3.31742				-1.16028	-1.39284	-3.40202	1.34802
	2.76891	4.8647	6.11329	3.17951				-1.1413	-1.3841	-3.3674	1.34545
	2.80573	4.94419	6.05977	3.04035				-1.11533	-1.34991	-3.28622	1.27829
	2.83481	5.00474	5.99277	2.96436				-1.07793	-1.39659	-3.22605	1.19191
	2.8241	4.96902	5.93047	2.977				-1.04786	-1.47415	-3.22973	1.20302
	2.7644	4.92976	5.8868	3.01753				-1.04855	-1.47834	-3.22562	1.31847
	2.72	4.92226	5.85552	3.05416				-1.07422	-1.49602	-3.21609	1.41974
	2.72414	4.86738	5.83268	3.10234				-1.09755	-1.57761	-3.28249	1.47805
	2.73599	4.81402	5.77119	3.10878				-1.11192	-1.60978	-3.41229	1.48991
	2.73583	4.84202	5.65142	3.05859				-1.11594	-1.58846	-3.5276	1.4102
	2.73313	4.87824	5.55306	3.00647				-1.10278	-1.62239	-3.61492	1.27775
	2.71284	4.83657	5.54773	2.96871				-1.08728	-1.65505	-3.67504	1.21263
	2.6725	4.78334	5.59878	2.90138				-1.09063	-1.59575	-3.64427	1.2038
	2.6485	4.74935	5.64349	2.84724				-1.10342	-1.55077	-3.54025	1.18037
	2.65473	4.68991	5.65669	2.84973				-1.10141	-1.57736	-3.48018	1.18887
	2.66742	4.68162	5.6389	2.88794				-1.10111	-1.57576	-3.47355	1.26578
	2.68098	4.80447	5.63363	2.91877				-1.10449	-1.54716	-3.45053	1.31974
	2.70833	4.9483	5.69397	2.99206				-1.09623	-1.58849	-3.46624	1.3058
	2.72779	4.98432	5.76878	3.11644				-1.08817	-1.637	-3.56224	1.28446
	2.71592	4.96992	5.77039	3.23108				-1.09599	-1.61866	-3.63592	1.24683
	2.69902	4.935	5.68713	3.30791				-1.10532	-1.63535	-3.67033	1.16715
	2.6978	4.83961	5.59463	3.3642				-1.10544	-1.69781	-3.70641	1.12615
	2.69343	4.76733	5.5377	3.36602				-1.11301	-1.67979	-3.69871	1.13762
	2.69556	4.80019	5.50743	3.32249				-1.11958	-1.61554	-3.63467	1.1338
	2.71955	4.85602	5.50371	3.30678				-1.11578	-1.64858	-3.59431	1.14054
	2.73359	4.87274	5.51157	3.30117				-1.11195	-1.71441	-3.57603	1.20862
	2.72346	4.93523	5.50274	3.24556				-1.10911	-1.7246	-3.51771	1.26496
	2.72786	5.02082	5.48773	3.18158				-1.09796	-1.75986	-3.45558	1.24161
	2.75689	5.02203	5.51737	3.16483				-1.08508	-1.81742	-3.44099	1.20482
	2.78116	4.97266	5.55565	3.18366				-1.09473	-1.79372	-3.44048	1.20667
	2.79512	4.93881	5.54758	3.24633				-1.1214	-1.76005	-3.43208	1.2508
	2.79874	4.86833	5.5737	3.36888				-1.14707	-1.8151	-3.4663	1.34436
	2.77067	4.7638	5.60001	3.48766				-1.16026	-1.85261	-3.55598	1.49148
	2.7129	4.74742	5.59887	3.52227				-1.15877	-1.81203	-3.62292	1.59247
	2.67643	4.78928	5.58319	3.51579				-1.13742	-1.80484	-3.66759	1.56362
	2.68744	4.78569	5.57686	3.52298				-1.10576	-1.84082	-3.72648	1.47843
	2.71936	4.79422	5.56524	3.54491				-1.09077	-1.8123	-3.74511	1.42783
	2.75852	4.87303	5.58342	3.55474				-1.0859	-1.76618	-3.69929	1.37784
	2.8035	4.90992	5.68546	3.56382				-1.08174	-1.79152	-3.67188	1.31628
	2.81692	4.8557	5.82961	3.54063				-1.0847	-1.79635	-3.68933	1.27914
	2.78181	4.79884	5.93337	3.48643				-1.10207	-1.74541	-3.6965	1.26521
	2.74826	4.71057	5.96106	3.46507				-1.12202	-1.74674	-3.71661	1.29497
	2.73518	4.55717	5.92356	3.49464				-1.13787	-1.77652	-3.75239	1.41927
	2.71867	4.47072	5.83107	3.48751				-1.14725	-1.73701	-3.7375	1.55136
	2.71737	4.52586	5.74008	3.42927				-1.13996	-1.729	-3.66171	1.55048
	2.74002	4.61574	5.71927	3.3818				-1.12183	-1.83602	-3.6074	1.45175
	2.74617	4.7045	5.75002	3.36733				-1.11076	-1.92784	-3.57475	1.38329
	2.731	4.8308	5.77015	3.36308				-1.11752	-1.95376	-3.50458	1.36
	2.73686	4.90323	5.77696	3.37331				-1.13203	-1.99102	-3.43023	1.35586
	2.75507	4.85483	5.79546	3.37108				-1.15018	-1.99891	-3.43071	1.39777
	2.75297	4.80427	5.79352	3.33857				-1.17463	-1.90792	-3.50043	1.46532
	2.74685	4.82509	5.74833	3.3126				-1.1917	-1.83667	-3.60488	1.4754
	2.75217	4.81912	5.67271	3.32697				-1.18517	-1.85266	-3.73545	1.44276
	2.7503	4.79209	5.58206	3.33663				-1.16605	-1.84514	-3.82707	1.44201
	2.74183	4.83956	5.52075	3.29314				-1.15657	-1.79667	-3.80742	1.4424
	2.75131	4.89882	5.56281	3.25349				-1.18519	-1.79556	-3.76156	1.40691
	2.75849	4.90142	5.66859	3.25336				-1.17642	-1.78449	-3.77778	1.39192
	2.73383	4.91914	5.72203	3.30348				-1.15486	-1.6791	-3.79119	1.42095
	2.70393	4.94202	5.6772	3.37445				-1.12731	-1.59687	-3.77359	1.44608
	2.6896	4.86313	5.57601	3.48103				-1.10599	-1.6199	-3.7937	1.4987
	2.66779	4.76279	5.47287	3.57155				-1.11349	-1.65377	-3.81875	1.60145
	2.64535	4.75542	5.42623	3.6165				-1.14581	-1.68542	-3.79285	1.67851
	2.65517	4.76664	5.46411	3.67122				-1.1668	-1.78322	-3.76977	1.69712
	2.68128	4.74746	5.54776	3.74703				-1.17018	-1.86551	-3.75577	1.71408
	2.70292	4.79325	5.59799	3.73064				-1.16814	-1.85862	-3.67694	1.69039
	2.74128	4.89975	5.59963	3.61686				-1.16087	-1.88168	-3.57493	1.55152
	2.79157	4.96024	5.62184	3.50221				-1.1364	-1.96406	-3.57683	1.35564
	2.82019	4.99114	5.70161	3.44222				-1.10804	-1.97694	-3.67036	1.18241
	2.83021	5.02292	5.78814	3.43774				-1.08747	-1.92198	-3.75986	1.04217
	2.83996	4.98165	5.83626	3.49634				-1.0703	-1.89809	-3.80595	0.998832
	2.82983	4.86525	5.80113	3.54991				-1.06729	-1.87041	-3.80888	1.13993
	2.78813	4.80868	5.68502	3.52961				-1.08417	-1.80979	-3.74736	1.38227
	2.74296	4.83534	5.58684	3.48159				-1.09485	-1.82748	-3.68574	1.52327
	2.71751	4.84916	5.57891	3.49269				-1.07742	-1.91277	-3.69718	1.55391
	2.71117	4.88895	5.61248	3.53903				-1.06443	-1.92345	-3.7134	1.56481
	2.73469	4.99521	5.61937	3.57375				-1.0755	-1.86384	-3.66339	1.56731
	2.78847	5.06944	5.61177	3.61508				-1.0981	-1.8438	-3.61864	1.57335
	2.82573	5.07159	5.61568	3.64598				-1.13299	-1.81807	-3.61672	1.62357
	2.81776	5.0934	5.65478	3.5937				-1.17218	-1.74156	-3.58725	1.65228
	2.80088	5.09832	5.72946	3.49142				-1.19314	-1.72109	-3.56382	1.57267
	2.79452	4.99053	5.81526	3.41141				-1.18881	-1.75607	-3.61442	1.46865
	2.77098	4.8596	5.84782	3.32633				-1.17126	-1.72391	-3.68424	1.37252
	2.73117	4.7971	5.80815	3.24051				-1.12877	-1.66401	-3.74128	1.21746
	2.69976	4.75795	5.7664	3.2329				-1.06785	-1.6691	-3.81556	1.02501
	2.68324	4.73308	5.77565	3.29991				-1.02955	-1.64956	-3.85574	0.883017
	2.69458	4.79216	5.806	3.34767				-1.04011	-1.56807	-3.81961	0.791334
	2.74423	4.87286	5.80545	3.37379				-1.08699	-1.54508	-3.76482	0.761939
	2.79487	4.87913	5.74269	3.37548				-1.13563	-1.5733	-3.74586	0.868807
	2.80352	4.86385	5.60071	3.33788				-1.16831	-1.55613	-3.7305	1.07293
	2.78861	4.88261	5.43802	3.31462				-1.17144	-1.55861	-3.70421	1.22992
	2.78295	4.88433	5.37439	3.38245				-1.15832	-1.64946	-3.70459	1.29283
	2.77622	4.88515	5.4173	3.46875				-1.15865	-1.70862	-3.74788	1.30751
	2.75547	4.99001	5.51382	3.49252				-1.18266	-1.67836	-3.78334	1.2746
	2.7442	5.12341	5.63973	3.47317				-1.20747	-1.65859	-3.82949	1.19592
	2.75154	5.14876	5.77206	3.44302				-1.21794	-1.64907	-3.90002	1.16274
	2.75619	5.1134	5.85062	3.39009				-1.22491	-1.57087	-3.91817	1.18236
	2.76948	5.08495	5.85391	3.36066				-1.22271	-1.50234	-3.85984	1.18096
	2.80267	5.01061	5.80918	3.39812				-1.21512	-1.52358	-3.82509	1.17827
	2.82202	4.92937	5.75398	3.4612				-1.22052	-1.51405	-3.82466	1.23726
	2.81965	4.9494	5.73987	3.49405				-1.23753	-1.43439	-3.78316	1.29557
	2.84323	4.99325	5.79344	3.52346				-1.2452	-1.40473	-3.73005	1.29957
	2.88943	4.98337	5.88397	3.52642				-1.23925	-1.41984	-3.719	1.3021
	2.91547	5.00157	5.92992	3.45106				-1.23424	-1.40173	-3.72226	1.29526
	2.93339	5.05676	5.91514	3.34117				-1.2328	-1.44072	-3.74752	1.22307
	2.94774	5.0356	5.8914	3.2951				-1.23511	-1.56219	-3.82772	1.14566
	2.92434	4.97473	5.8778	3.33358				-1.24062	-1.6167	-3.91195	1.11439
	2.87588	4.99073	5.83997	3.42573				-1.24755	-1.59465	-3.93356	1.0687
	2.84756	5.02572	5.77763	3.54289				-1.24888	-1.6066	-3.93016	1.02448
	2.8251	5.00762	5.71966	3.59851				-1.25765	-1.60265	-3.94413	1.07634
	2.78215	5.00753	5.67673	3.54104				-1.28957	-1.50211	-3.94344	1.21311
	2.74535	5.05457	5.68241	3.42963				-1.32597	-1.41453	-3.93102	1.33695
	2.73051	5.05117	5.75096	3.37384				-1.34172	-1.40718	-3.97959	1.44045
	2.72123	5.02369	5.80478	3.3733				-1.34341	-1.39385	-4.0419	1.52112
	2.72935	5.046	5.7844	3.37995				-1.34599	-1.39372	-4.00541	1.517
	2.77551	5.04258	5.7235	3.36402				-1.33616	-1.48477	-3.91113	1.43851
	2.82111	4.99913	5.66109	3.32438				-1.3162	-1.56616	-3.84949	1.3901
	2.82292	5.02991	5.58479	3.26534				-1.29471	-1.53276	-3.79896	1.40097
	2.80075	5.10257	5.49881	3.24886				-1.26401	-1.50833	-3.77653	1.43934
	2.77132	5.06416	5.418	3.30642				-1.22691	-1.55641	-3.83505	1.49144
	2.73005	4.97171	5.34772	3.38494				-1.21129	-1.55604	-3.87725	1.50164
	2.70658	4.94724	5.29788	3.42592				-1.22273	-1.50726	-3.83624	1.39996
	2.72287	4.95423	5.29615	3.4577				-1.23854	-1.49235	-3.79863	1.29743
	2.7408	4.9698	5.3377	3.46401				-1.26022	-1.45088	-3.79649	1.33581
	2.74994	5.04912	5.40188	3.40837				-1.29288	-1.36507	-3.76261	1.45854
	2.78623	5.13354	5.48818	3.33214				-1.31918	-1.37593	-3.71856	1.51376
	2.83743	5.106	5.5842	3.30701				-1.32277	-1.45555	-3.71438	1.50273
	2.85643	5.03573	5.63377	3.30507				-1.3208	-1.45053	-3.72408	1.46309
	2.84004	5.01128	5.61415	3.28692				-1.3254	-1.39514	-3.74162	1.36628
[truncated: 5,501 more rows]

## Sheet: panel_D
	-0.276498	0.40436	0.381589	0.0536576			-0.140751	0.475899	-0.389228	0.244124
	-0.229606	0.242716	0.38896	0.00824041			0.0217304	0.412815	-0.40825	0.314217
	-0.211267	0.00704993	0.373899	-0.0155535			0.0235084	0.448971	-0.390117	0.420817
	-0.233229	-0.106176	0.419513	0.0148372			-0.0624381	0.519763	-0.286185	0.429861
	-0.249145	-0.168871	0.518096	0.0584882			-0.0929744	0.590881	-0.206006	0.347259
	-0.234406	-0.205083	0.595436	0.0943311			-0.0986108	0.706581	-0.218869	0.25073
	-0.223351	-0.104559	0.616033	0.163971			-0.0951671	0.773702	-0.243638	0.163184
	-0.241606	0.0914297	0.598484	0.219925			-0.040731	0.705125	-0.229648	0.130102
	-0.301555	0.286566	0.553647	0.206981			-0.0278001	0.653644	-0.216239	0.172808
	-0.407237	0.561555	0.513755	0.156225			-0.119568	0.729783	-0.196994	0.193872
	-0.49252	0.923099	0.516668	0.12765			-0.169379	0.843481	-0.205914	0.142257
	-0.495753	1.08569	0.513889	0.106114			-0.106095	0.950377	-0.280159	0.108745
	-0.443102	1.01848	0.454657	0.0746868			-0.0660679	1.08922	-0.340024	0.131281
	-0.3797	0.912808	0.403769	0.111321			-0.0831631	1.13923	-0.278014	0.144676
	-0.314402	0.659397	0.4592	0.129087			-0.0655479	1.04437	-0.155248	0.144969
	-0.22883	0.224662	0.578838	0.105937			-0.0474268	0.942858	-0.0792117	0.163869
	-0.146717	-0.134658	0.664857	0.122888			-0.0663644	0.880798	-0.0289863	0.160425
	-0.109001	-0.348583	0.664901	0.20876			-0.0508821	0.787086	0.0299928	0.134152
	-0.15479	-0.519532	0.546348	0.292895			0.00658505	0.702464	0.108417	0.149184
	-0.262613	-0.593627	0.35259	0.310123			-0.00571513	0.678296	0.194244	0.179182
	-0.369476	-0.43809	0.222582	0.275643			-0.0571085	0.609134	0.261478	0.129522
	-0.417448	-0.301054	0.218158	0.200063			-0.0572339	0.448721	0.192317	0.0314
	-0.422174	-0.320703	0.259613	0.122799			-0.0699198	0.308907	-0.0478904	-0.0253348
	-0.435635	-0.389646	0.306024	0.0972393			-0.157761	0.251277	-0.293293	-0.0376483
	-0.452761	-0.432604	0.386349	0.11342			-0.208598	0.221496	-0.387329	-0.0317932
	-0.436739	-0.493952	0.472552	0.0872173			-0.169404	0.234741	-0.366532	-0.00998908
	-0.375407	-0.452906	0.518603	0.0239234			-0.164275	0.339597	-0.321185	-0.0252011
	-0.30003	-0.172238	0.526636	0.0138904			-0.198966	0.449335	-0.294787	-0.10823
	-0.250444	0.184868	0.507179	0.0741126			-0.2036	0.510555	-0.333135	-0.165126
	-0.253964	0.391453	0.460862	0.153885			-0.226124	0.593916	-0.370885	-0.142903
	-0.281937	0.512157	0.476781	0.195894			-0.280113	0.682433	-0.246037	-0.134076
	-0.273811	0.542226	0.608956	0.141405			-0.221966	0.687411	0.0107478	-0.2039
	-0.211174	0.359594	0.751303	-0.0453735			-0.0538667	0.671588	0.174099	-0.289733
	-0.110048	0.16174	0.757744	-0.26118			0.0483421	0.707253	0.148637	-0.339192
	-0.0178636	0.107346	0.649528	-0.385671			0.0705415	0.717011	0.0315279	-0.338619
	0.0129306	0.048204	0.539184	-0.41171			0.0683517	0.68412	-0.113361	-0.264159
	-0.0135045	-0.0506976	0.513828	-0.390284			-0.0208037	0.661615	-0.223097	-0.149747
	-0.0359281	-0.00611917	0.641265	-0.307492			-0.179341	0.613943	-0.262302	-0.0787661
	-0.0512328	0.120498	0.866115	-0.158572			-0.23752	0.49492	-0.30049	-0.04051
	-0.0596888	0.14268	0.988755	0.00364048			-0.17185	0.416023	-0.39643	0.0335478
	-0.0777494	0.157032	0.904001	0.114988			-0.117008	0.440077	-0.436084	0.108844
	-0.132666	0.263993	0.753455	0.144643			-0.0660559	0.476365	-0.3241	0.108331
	-0.179734	0.336094	0.652159	0.0525144			0.00640254	0.465213	-0.188755	0.0578528
	-0.161588	0.321694	0.57635	-0.115345			0.0120475	0.468673	-0.159031	0.0102424
	-0.0955886	0.339832	0.487638	-0.235911			-0.0695734	0.490099	-0.192873	-0.0303287
	-0.0449445	0.315507	0.351304	-0.257674			-0.0997114	0.46287	-0.214395	-0.0431765
	-0.0193948	0.166397	0.159129	-0.247808			-0.0970445	0.46176	-0.206401	-0.00750654
	-0.00885047	0.129258	-0.00010197	-0.212734			-0.168165	0.554714	-0.122318	-0.00261255
	-0.00652584	0.293095	-0.0162394	-0.135975			-0.213865	0.64176	-0.0264544	-0.0813876
	0.010787	0.382267	0.0626909	-0.0558284			-0.144446	0.657359	-0.0739608	-0.164237
	0.0486567	0.332964	0.100742	-0.00287588			-0.0864295	0.650493	-0.224496	-0.176119
	0.0761623	0.365712	0.084958	0.0525009			-0.120902	0.591538	-0.295079	-0.147358
	0.0533735	0.404644	0.0718645	0.0784285			-0.147846	0.443851	-0.235583	-0.104247
	-0.00461175	0.309925	0.0734571	0.0322123			-0.173899	0.330512	-0.125677	-0.0479772
	-0.0510481	0.24372	0.0497783	-0.0160291			-0.225216	0.284986	-0.0120337	-0.0230556
	-0.0405944	0.218705	-0.00915164	-0.00965195			-0.186901	0.207578	0.0495527	-0.0314409
	0.0601144	0.0813663	-0.132326	0.000689933			-0.0488032	0.109781	0.0116491	0.00313554
	0.21396	-0.0619432	-0.271353	-0.0207377			0.0273954	0.0951504	-0.036933	0.0870749
	0.317772	-0.0598899	-0.292891	-0.050931			0.0207638	0.159773	-0.00790102	0.12039
	0.330331	-0.0682872	-0.15901	-0.0918082			0.0619308	0.248062	0.0412817	0.089916
	0.320589	-0.13931	-0.000662121	-0.125842			0.101551	0.392853	0.0140895	0.0775719
	0.331613	-0.12525	0.0620233	-0.0941308			0.0340265	0.546016	-0.0173645	0.0954773
	0.356881	0.0391976	0.0391504	-0.00395458			-0.0635837	0.561934	0.0328619	0.10947
	0.392356	0.0581014	-0.0172826	0.0405393			-0.124233	0.440152	0.129337	0.119049
	0.403205	-0.0743117	-0.0298001	0.033213			-0.183228	0.335945	0.208522	0.100009
	0.371603	-0.233299	0.0634821	0.0648863			-0.182962	0.253172	0.243005	0.0184478
	0.343136	-0.443643	0.208971	0.157422			-0.0417984	0.148061	0.201247	-0.0557306
	0.368968	-0.624958	0.272222	0.253582			0.0767365	0.12005	0.120336	-0.0496748
	0.404217	-0.547578	0.221052	0.335231			0.0395688	0.1799	0.1517	-0.0363993
	0.410844	-0.235303	0.149353	0.362859			-0.0506602	0.184259	0.277182	-0.0802822
	0.382459	0.0389919	0.106912	0.317975			-0.110503	0.122656	0.340641	-0.1404
	0.326946	0.217461	0.0813616	0.269132			-0.206642	0.0649601	0.298199	-0.192739
	0.273266	0.331009	0.0708856	0.308375			-0.297484	-0.045392	0.247489	-0.261983
	0.254768	0.27601	0.0654833	0.380145			-0.301385	-0.180689	0.234454	-0.299159
	0.270316	0.156676	0.0521905	0.398654			-0.282159	-0.16528	0.257492	-0.266458
	0.28312	0.209674	0.058281	0.35288			-0.259483	-0.00435116	0.298878	-0.232534
	0.289594	0.3835	0.107305	0.27813			-0.145973	0.154057	0.271128	-0.228905
	0.309649	0.483771	0.117147	0.200897			0.0243285	0.245379	0.139781	-0.191411
	0.340103	0.525068	0.0367785	0.169515			0.0874536	0.28387	0.0260223	-0.123401
	0.354854	0.556145	-0.0760655	0.18325			0.0560059	0.229578	0.0523626	-0.0942299
	0.349252	0.478816	-0.135049	0.150584			0.040179	0.119675	0.165508	-0.0811296
	0.326741	0.337386	-0.128908	0.037507			0.0280666	0.0680556	0.254634	-0.0425661
	0.283385	0.291565	-0.0547387	-0.0737454			0.0104402	0.0617088	0.318198	-0.0204169
	0.246226	0.319046	0.047971	-0.111952			0.0610978	0.00969054	0.359337	-0.0202694
	0.223807	0.224579	0.0801141	-0.128009			0.135261	-0.0384689	0.366087	0.0188658
	0.186648	0.0761436	-0.00137986	-0.161482			0.101997	-0.000798965	0.380276	0.070057
	0.13955	0.0258084	-0.123712	-0.195591			0.0384374	0.0204868	0.444952	0.0702578
	0.114249	0.0103197	-0.235373	-0.21574			0.0565387	-0.0076408	0.45816	0.0661395
	0.109377	-0.0167456	-0.356374	-0.212554			0.0712542	0.0125778	0.371212	0.102434
	0.10129	0.0530899	-0.455326	-0.15311			0.0311618	0.053314	0.283719	0.127839
	0.0920351	0.138748	-0.479758	-0.0662882			0.0298216	0.00914693	0.248396	0.137272
	0.0729657	0.0934434	-0.433827	-0.00320219			0.0690177	-0.0492006	0.23143	0.1761
	0.0596759	0.0741941	-0.342484	0.0449886			0.053631	-0.0668481	0.222624	0.201923
	0.0641307	0.166214	-0.22321	0.100367			0.0516585	-0.132907	0.210394	0.17193
	0.0814604	0.188988	-0.102694	0.0938908			0.103009	-0.238651	0.143782	0.15972
	0.0879036	0.0961072	-0.0860661	3.42843e-05			0.114305	-0.279991	0.106815	0.195524
	0.0669048	0.0120287	-0.130764	-0.123794			0.0676925	-0.265839	0.197502	0.208095
	0.0178615	-0.157789	-0.122208	-0.22198			0.080674	-0.265414	0.322627	0.181737
	-0.0302365	-0.466053	-0.049244	-0.285525			0.140534	-0.243558	0.303247	0.161393
	-0.0634646	-0.657963	0.0172697	-0.263785			0.140272	-0.19944	0.159671	0.115546
	-0.108963	-0.590606	0.0134935	-0.160438			0.133382	-0.238361	0.0425381	0.0311715
	-0.163946	-0.421866	-0.12257	-0.0699976			0.166626	-0.351374	0.0181173	-0.0217593
	-0.189609	-0.302426	-0.371513	-0.0585469			0.151662	-0.434631	0.0921961	-0.048729
	-0.153584	-0.236442	-0.543976	-0.0750179			0.0737436	-0.513622	0.217823	-0.136151
	-0.0544935	-0.301176	-0.530447	-0.0882093			0.0584383	-0.633431	0.273476	-0.262086
	0.0637532	-0.50381	-0.420631	-0.124744			0.0793388	-0.64986	0.214019	-0.32858
	0.128565	-0.577158	-0.351071	-0.171062			0.0397105	-0.496055	0.180776	-0.336662
	0.116503	-0.447869	-0.324036	-0.222583			0.0246598	-0.327509	0.265551	-0.311476
	0.0811855	-0.343149	-0.320751	-0.307876			0.0734421	-0.236833	0.344473	-0.224547
	0.0620197	-0.29053	-0.349973	-0.396235			0.0745923	-0.217371	0.344136	-0.111212
	0.0465459	-0.162246	-0.381365	-0.411308			0.0409682	-0.333728	0.303482	-0.064234
	0.0181934	-0.147499	-0.392562	-0.387019			0.0984757	-0.563319	0.271834	-0.0869793
	0.000564519	-0.29401	-0.402042	-0.40002			0.178567	-0.719474	0.279049	-0.132854
	0.0265177	-0.264721	-0.395971	-0.445758			0.161353	-0.78691	0.357478	-0.214047
	0.0907262	0.0146407	-0.33246	-0.468077			0.145648	-0.882069	0.407751	-0.310152
	0.179985	0.258116	-0.278271	-0.430888			0.184669	-0.998696	0.297254	-0.334238
	0.261399	0.347907	-0.311437	-0.309065			0.19126	-1.06084	0.103489	-0.27172
	0.292315	0.315804	-0.376132	-0.151117			0.156091	-1.10555	0.00634171	-0.182453
	0.269846	0.0472342	-0.408065	-0.0751998			0.159855	-1.16831	0.0449425	-0.0757736
	0.253816	-0.343163	-0.443344	-0.125907			0.136334	-1.18461	0.111469	0.0451318
	0.243525	-0.576422	-0.498516	-0.175691			0.0570115	-1.1563	0.14613	0.0979311
	0.243889	-0.672628	-0.539796	-0.139804			0.0543462	-1.14747	0.114616	0.055934
	0.22218	-0.791453	-0.592994	-0.0588278			0.151836	-1.11973	0.0253482	-0.00610294
	0.171926	-0.822857	-0.646892	-0.00316759			0.205164	-1.01106	-0.0118714	-0.0461057
	0.107658	-0.649287	-0.605667	0.0054895			0.209967	-0.922524	0.0651855	-0.0767281
	0.0809335	-0.463479	-0.460518	0.0314316			0.257231	-0.932382	0.126857	-0.0627849
	0.106197	-0.409227	-0.320431	0.0406827			0.261711	-0.946022	0.0749981	0.00230768
	0.129331	-0.370334	-0.266339	0.0764977			0.176049	-0.920839	0.0247018	-0.0216964
	0.130165	-0.364547	-0.286196	0.119842			0.120797	-0.871645	0.0541918	-0.0322526
	0.134678	-0.468731	-0.378541	0.117566			0.11648	-0.744589	0.0961446	0.00515936
	0.153002	-0.519544	-0.463543	0.0765811			0.0747807	-0.567839	0.0873102	0.0583316
	0.179473	-0.437713	-0.449802	0.0662171			0.0611091	-0.526581	-0.0143167	0.0417076
	0.195457	-0.401667	-0.392211	0.0847536			0.138843	-0.642324	-0.212988	-0.010603
	0.19383	-0.372749	-0.432404	0.117069			0.169358	-0.731568	-0.388489	-0.0159137
	0.164037	-0.164874	-0.553767	0.162825			0.11036	-0.733265	-0.377803	0.028194
	0.10209	0.120193	-0.632303	0.186144			0.102351	-0.713536	-0.256916	0.0962503
	0.0168318	0.255531	-0.614826	0.140638			0.166702	-0.714523	-0.224088	0.170477
	-0.0713092	0.297475	-0.529989	0.065012			0.185362	-0.739765	-0.320677	0.185813
	-0.132246	0.288962	-0.431392	0.0178385			0.163132	-0.830627	-0.409871	0.111984
	-0.145773	0.117471	-0.400766	-0.0224154			0.14359	-0.941402	-0.397301	0.0457144
	-0.129749	-0.120473	-0.467349	-0.0838254			0.066486	-0.970607	-0.269362	0.0501861
	-0.155328	-0.212183	-0.533958	-0.109539			-0.0175937	-0.926291	-0.0786989	0.0502188
	-0.223615	-0.184046	-0.528274	-0.0611109			0.0206029	-0.89592	0.015579	0.00398496
	-0.284948	-0.180111	-0.51131	0.0271708			0.126709	-0.850829	-0.0678369	-0.0301641
	-0.31546	-0.12516	-0.5467	0.104766			0.140761	-0.732254	-0.199171	-0.0226087
	-0.329379	0.0405504	-0.616618	0.155733			0.11793	-0.606851	-0.227961	0.0161422
	-0.328264	0.158714	-0.683008	0.145471			0.127789	-0.486659	-0.215325	0.110687
	-0.319876	0.198322	-0.719098	0.125675			0.0957118	-0.315004	-0.225014	0.221621
	-0.304717	0.310241	-0.699248	0.17871			0.0345629	-0.19396	-0.225411	0.242951
	-0.270322	0.401553	-0.661047	0.27788			0.052819	-0.258062	-0.222473	0.177948
	-0.232213	0.328011	-0.694862	0.300443			0.10258	-0.40664	-0.219628	0.132237
	-0.225553	0.271891	-0.791775	0.247583			0.0937609	-0.502759	-0.153509	0.117835
	-0.261955	0.272825	-0.849	0.18573			0.124459	-0.563628	-0.0487021	0.0851984
	-0.311434	0.134199	-0.824767	0.133414			0.213624	-0.598259	-0.0296913	0.0415285
	-0.351158	-0.0572494	-0.796722	0.0879852			0.226977	-0.595348	-0.0734619	-0.0227079
	-0.392036	-0.123141	-0.79631	0.0601482			0.139362	-0.598285	-0.0593523	-0.142798
	-0.431537	-0.142519	-0.814386	0.0127763			0.054469	-0.61533	0.0161022	-0.247989
	-0.439354	-0.210664	-0.83842	-0.0794185			-0.0289422	-0.540264	0.0944825	-0.24687
	-0.417826	-0.232765	-0.841043	-0.137244			-0.138114	-0.355792	0.144118	-0.207807
	-0.407996	-0.265103	-0.794942	-0.0999358			-0.164619	-0.234033	0.1448	-0.215251
	-0.415579	-0.453616	-0.765111	-0.0218795			-0.0921648	-0.225804	0.0645303	-0.21651
	-0.433509	-0.625904	-0.80875	0.0399222			-0.0352902	-0.219372	-0.00793952	-0.176695
	-0.445939	-0.515879	-0.851798	0.0974011			0.00346989	-0.193006	-0.000375837	-0.143635
	-0.39744	-0.25801	-0.815692	0.1492			0.111945	-0.207566	0.0190246	-0.123007
	-0.277237	-0.110223	-0.735362	0.195265			0.211891	-0.18605	-0.0352608	-0.100315
	-0.163353	-0.0386916	-0.69385	0.270716			0.193177	-0.116747	-0.0973295	-0.119222
	-0.123873	-0.0177452	-0.707673	0.340324			0.142285	-0.100083	-0.0874339	-0.155764
	-0.127251	-0.115986	-0.761832	0.312237			0.0912706	-0.0909604	-0.0376379	-0.101295
	-0.141417	-0.162203	-0.829667	0.219385			-0.000898304	-0.0300413	0.0271281	0.0289135
	-0.156537	-0.0160195	-0.843999	0.16322			-0.0472183	-0.056058	0.108372	0.106434
	-0.183448	0.0814136	-0.800159	0.162639			0.0525036	-0.211179	0.100334	0.0973374
	-0.234113	-0.00636182	-0.780962	0.172429			0.141798	-0.29712	0.0283106	0.0625601
	-0.306541	-0.104289	-0.824298	0.188485			0.0840514	-0.242503	0.0391989	0.0145849
	-0.355089	-0.208946	-0.86829	0.170716			-0.00715865	-0.152375	0.153153	-0.0153108
	-0.340229	-0.38453	-0.880339	0.112641			-0.0400067	-0.0776564	0.240813	0.0209821
	-0.288735	-0.458703	-0.879722	0.0764223			-0.0355196	-0.042301	0.245369	0.0669342
	-0.240095	-0.37065	-0.849544	0.119752			0.0259145	-0.0986457	0.213938	0.0426362
	-0.197906	-0.363473	-0.816022	0.174455			0.14671	-0.185877	0.205358	0.00671138
	-0.160301	-0.526715	-0.840931	0.171488			0.191955	-0.140806	0.263282	0.0274312
	-0.148673	-0.629451	-0.920661	0.128004			0.127415	0.0169567	0.40963	0.0355232
	-0.151569	-0.611915	-0.957949	0.0849548			0.0939295	0.131559	0.537099	-0.0107359
	-0.120924	-0.58578	-0.944767	0.0661854			0.104016	0.181651	0.509065	-0.0639837
	-0.0460878	-0.563489	-0.907825	0.103148			0.057283	0.225163	0.392623	-0.113548
	0.0696187	-0.555693	-0.828546	0.179805			0.0100567	0.224505	0.327109	-0.150109
	0.200988	-0.695982	-0.734667	0.208463			0.0639043	0.191031	0.316397	-0.110744
	0.28919	-0.85466	-0.725754	0.179427			0.114067	0.212184	0.277717	-0.0145022
	0.290191	-0.798528	-0.809861	0.195381			0.0807779	0.193771	0.234355	0.0205842
	0.234047	-0.64138	-0.919458	0.275802			0.02814	0.0625152	0.193268	-0.0199566
	0.183446	-0.651455	-1.04226	0.32631			-0.0548388	-0.0284123	0.173758	-0.0469029
	0.172383	-0.702528	-1.14112	0.288437			-0.204303	0.028531	0.25851	-0.0427518
	0.211237	-0.667691	-1.12184	0.185603			-0.285475	0.108528	0.423917	-0.0369785
	0.250666	-0.698689	-1.0044	0.0819079			-0.198715	0.128969	0.501181	-0.039582
	0.253397	-0.805622	-0.915216	0.0636438			-0.0812378	0.144598	0.441881	-0.0333546
	0.22877	-0.881823	-0.888457	0.167605			-0.0137487	0.200349	0.399572	-0.101514
	0.227864	-0.980963	-0.883026	0.303317			0.0493434	0.329366	0.445767	-0.182472
	0.27268	-1.11339	-0.914199	0.382766			0.0787427	0.542921	0.510755	-0.186172
	0.338326	-1.06599	-0.956399	0.427504			0.0165882	0.728776	0.505379	-0.152029
	0.380128	-0.787575	-0.935641	0.516684			-0.0187519	0.736172	0.379448	-0.166116
	0.392711	-0.524212	-0.873871	0.607377			0.0277499	0.605948	0.148141	-0.210813
	0.406132	-0.392508	-0.849579	0.622013			0.022477	0.494095	-0.0168255	-0.254409
	0.427991	-0.299131	-0.847886	0.550822			-0.0600527	0.415382	0.0558133	-0.298358
	0.457269	-0.296452	-0.841932	0.452679			-0.0977795	0.307795	0.251358	-0.308528
	0.488877	-0.462394	-0.87288	0.38543			-0.0978586	0.209217	0.327452	-0.27547
	0.499123	-0.662768	-0.908034	0.413648			-0.145607	0.160737	0.259849	-0.286051
	0.469116	-0.893665	-0.899454	0.508893			-0.165901	0.122252	0.182404	-0.374889
	0.401037	-1.27784	-0.896116	0.554349			-0.132436	0.15193	0.149639	-0.443521
	0.320981	-1.61757	-0.969881	0.522908			-0.158344	0.316702	0.167929	-0.438452
	0.252491	-1.67687	-1.05931	0.522459			-0.212246	0.47042	0.223392	-0.410129
	0.227783	-1.55734	-1.11046	0.582988			-0.184146	0.466401	0.21848	-0.385844
	0.267939	-1.45212	-1.14779	0.618637			-0.129783	0.391618	0.173716	-0.354807
	0.367964	-1.29745	-1.18099	0.579969			-0.133143	0.366736	0.241996	-0.333502
	0.480305	-1.11479	-1.18504	0.472497			-0.0995881	0.384693	0.441761	-0.305309
	0.560032	-1.0405	-1.16488	0.326325			-0.0178891	0.433787	0.584869	-0.222875
	0.581986	-0.983062	-1.11002	0.251482			0.000483417	0.455678	0.617983	-0.139784
	0.511743	-0.850553	-0.970866	0.334158			-0.0158922	0.361746	0.632012	-0.143649
	0.376182	-0.796798	-0.781837	0.488218			0.00563786	0.185648	0.672266	-0.178607
	0.266141	-0.864122	-0.657732	0.561626			-0.027247	0.113812	0.738605	-0.1354
	0.231954	-0.868053	-0.625458	0.542292			-0.180235	0.207596	0.809243	-0.0371585
	0.23999	-0.852442	-0.628721	0.508273			-0.28864	0.321125	0.78597	0.0387307
	0.264583	-0.992172	-0.647892	0.490215			-0.283996	0.369373	0.606492	0.0833931
	0.273255	-1.17745	-0.696944	0.518652			-0.26062	0.391019	0.447103	0.0870221
	0.25496	-1.21977	-0.73422	0.576518			-0.232992	0.37058	0.495809	0.0521168
	0.269801	-1.15954	-0.756048	0.566274			-0.163288	0.308788	0.704594	0.0609334
	0.358996	-1.07958	-0.776364	0.438662			-0.146347	0.316861	0.898962	0.162804
	0.449135	-0.96841	-0.754413	0.332091			-0.214989	0.370643	0.975244	0.265383
	0.463211	-0.95765	-0.661687	0.338266			-0.228051	0.324981	0.889238	0.302611
	0.427316	-1.14062	-0.572726	0.405551			-0.199475	0.252846	0.690447	0.315725
	0.397186	-1.27737	-0.5729	0.455204			-0.257848	0.305422	0.566786	0.325235
	0.408562	-1.21113	-0.6119	0.458949			-0.35208	0.43741	0.602776	0.323367
	0.46566	-1.10585	-0.628335	0.402704			-0.378746	0.546333	0.670083	0.352284
	0.517337	-1.06624	-0.617635	0.365231			-0.407503	0.611632	0.666993	0.405607
	0.505059	-1.01336	-0.612815	0.426953			-0.476022	0.570813	0.645752	0.378797
	0.441935	-1.00979	-0.640253	0.508597			-0.489886	0.407409	0.660541	0.268322
	0.404004	-1.09068	-0.747545	0.485697			-0.474862	0.271349	0.684134	0.194092
	0.412749	-1.05391	-0.895765	0.395126			-0.491348	0.230774	0.70585	0.183183
	0.444452	-0.809762	-0.963803	0.34503			-0.459806	0.184333	0.679079	0.171582
	0.478991	-0.559144	-0.910236	0.34232			-0.333272	0.103099	0.583722	0.162976
	0.492562	-0.384317	-0.811578	0.323318			-0.247557	0.133732	0.492989	0.185946
	0.460696	-0.21942	-0.723193	0.256082			-0.333623	0.297971	0.518585	0.208718
	0.402148	-0.186245	-0.629695	0.128586			-0.286697	0.464286	0.598656	0.240863
	0.362889	-0.390006	-0.547311	-0.00541726			-0.20603	0.571816	0.597171	0.297108
	0.332549	-0.647342	-0.504608	-0.0281961			-0.185892	0.604184	0.536146	0.2835
	0.312473	-0.846266	-0.489584	0.0978801			-0.175109	0.487134	0.518619	0.160351
	0.308166	-1.06031	-0.535521	0.262184			-0.116396	0.316862	0.570222	0.0578133
	0.301985	-1.2008	-0.667868	0.362713			-0.110742	0.286179	0.656851	0.0624283
	0.272291	-1.14084	-0.809875	0.409973			-0.13912	0.34016	0.744132	0.0940296
	0.242844	-1.0368	-0.867044	0.411929			-0.0852944	0.313922	0.735515	0.0970998
	0.218551	-1.07051	-0.868103	0.386477			-0.0137647	0.236854	0.615616	0.087766
	0.183128	-1.13063	-0.848587	0.373518			-0.0501229	0.179343	0.542639	0.0699046
	0.15557	-1.13985	-0.782282	0.369506			-0.133645	0.124837	0.610402	0.0747249
	0.156233	-1.20182	-0.690507	0.300881			-0.193195	0.11647	0.714126	0.162471
	0.1661	-1.26897	-0.635358	0.203532			-0.287939	0.20266	0.742543	0.261108
	0.147758	-1.23011	-0.617856	0.172217			-0.385619	0.296372	0.713533	0.231727
	0.0786315	-1.19755	-0.597538	0.207247			-0.401119	0.344304	0.666082	0.116215
	-0.0179547	-1.26534	-0.606234	0.223677			-0.394535	0.406343	0.649454	0.0592277
	-0.0913618	-1.32894	-0.635922	0.196851			-0.421838	0.48131	0.721613	0.0756995
	-0.109495	-1.37731	-0.646555	0.165515			-0.376632	0.454684	0.824446	0.0975752
	-0.08941	-1.54554	-0.651953	0.170271			-0.240389	0.334391	0.810953	0.0937205
	-0.0457484	-1.73939	-0.68882	0.228362			-0.18517	0.248178	0.674573	0.0258441
	0.0306251	-1.75861	-0.707045	0.312796			-0.242029	0.222273	0.57829	-0.101615
	0.170004	-1.59966	-0.679166	0.318213			-0.291437	0.26599	0.547763	-0.159699
	0.370929	-1.36114	-0.657853	0.206014			-0.306647	0.435782	0.512723	-0.0877579
	0.582853	-1.02404	-0.640407	0.0977421			-0.30961	0.643531	0.453321	-0.00974977
	0.746792	-0.713305	-0.563614	0.110821			-0.226156	0.65867	0.384507	-0.00496055
	0.838714	-0.698471	-0.469968	0.187658			-0.0999009	0.517501	0.298711	-0.00703587
	0.871456	-0.844312	-0.439177	0.243572			-0.0834149	0.418038	0.287293	0.00683847
	0.859706	-0.882886	-0.447721	0.268922			-0.129563	0.393891	0.411421	-0.00685055
	0.830896	-0.899517	-0.469189	0.27005			-0.124079	0.40176	0.534516	-0.0318708
	0.801396	-1.02052	-0.539923	0.270314			-0.124516	0.449678	0.556408	-0.058598
	0.780508	-1.10667	-0.627625	0.316523			-0.199605	0.464927	0.562507	-0.133655
	0.755602	-1.15574	-0.669842	0.371224			-0.233733	0.378045	0.612225	-0.226007
	0.727951	-1.2478	-0.679797	0.325302			-0.211827	0.296047	0.641162	-0.225312
	0.702765	-1.31135	-0.693216	0.199295			-0.240461	0.287473	0.659617	-0.135643
	0.664453	-1.16823	-0.663997	0.0992907			-0.286909	0.246646	0.68927	-0.0505638
	0.617607	-1.08132	-0.603122	0.0666114			-0.269285	0.11818	0.657577	-0.0126478
	0.602723	-1.14075	-0.596241	0.0609202			-0.247608	0.000427352	0.584625	-0.0269302
	0.629557	-1.13398	-0.648732	0.0718897			-0.262965	-0.0318945	0.606009	-0.0949085
	0.67039	-1.01456	-0.706415	0.0639228			-0.21641	0.00462971	0.753007	-0.143852
	0.710378	-0.927288	-0.756766	0.00592443			-0.145038	0.147309	0.899905	-0.101886
	0.721874	-0.86015	-0.795803	-0.0597989			-0.172287	0.383287	0.988964	-0.0361676
	0.682494	-0.827022	-0.766786	-0.0797496			-0.295105	0.540041	1.0299	-0.0287683
	0.642417	-0.980009	-0.71446	-0.108035			-0.278646	0.530877	1.01013	-0.0400542
	0.656143	-1.18513	-0.732971	-0.168035			-0.22981	0.488144	0.970376	-0.0263662
	0.72069	-1.1299	-0.817049	-0.177267			-0.232934	0.461278	0.97098	-0.0262342
	0.784244	-0.926398	-0.871097	-0.0966689			-0.205819	0.367175	0.981415	-0.0514888
	0.802552	-0.819211	-0.87917	0.00683432			-0.172745	0.372462	0.947362	-0.0680276
	0.746266	-0.732883	-0.856551	0.0895162			-0.203139	0.436849	0.981939	-0.0780524
	0.64379	-0.60492	-0.799571	0.125991			-0.198548	0.471578	1.12772	-0.0721602
	0.566669	-0.610798	-0.763951	0.0993287			-0.100894	0.467708	1.24453	-0.0061241
	0.552908	-0.649712	-0.797745	0.0690553			-0.0508927	0.500648	1.23376	0.0873352
	0.593945	-0.52226	-0.843923	0.131422			-0.105951	0.496914	1.17027	0.108411
	0.643533	-0.414373	-0.85747	0.23759			-0.15324	0.40746	1.12374	0.0752141
	0.697082	-0.508654	-0.893035	0.276376			-0.205165	0.34818	1.12442	0.0950293
	0.740548	-0.632237	-0.990123	0.242052			-0.299776	0.391492	1.22194	0.168653
	0.738216	-0.70956	-1.08974	0.199556			-0.331848	0.46714	1.32731	0.231863
	0.694734	-0.862815	-1.18401	0.184335			-0.260114	0.53229	1.30699	0.273412
	0.6265	-1.01054	-1.26765	0.210771			-0.229617	0.610264	1.15811	0.291716
	0.543237	-1.04695	-1.27777	0.281361			-0.268651	0.650776	1.0447	0.257669
	0.48011	-1.10421	-1.18418	0.308369			-0.261787	0.603646	1.01863	0.217479
	0.482117	-1.2357	-1.06184	0.230748			-0.238169	0.555249	1.01087	0.219039
	0.53076	-1.2465	-0.969406	0.137474			-0.279899	0.536206	1.00056	0.199607
	0.576232	-1.09467	-0.901086	0.152992			-0.322154	0.455398	0.971884	0.12102
	0.585771	-0.927184	-0.879703	0.253799			-0.318658	0.340335	0.906777	0.0670732
	0.552329	-0.702086	-0.917601	0.364356			-0.334796	0.314304	0.862044	0.0845288
	0.517918	-0.361453	-0.979811	0.428907			-0.303653	0.31979	0.905734	0.119604
	0.534431	-0.170233	-1.05404	0.412276			-0.130941	0.282005	0.967571	0.15405
	0.592237	-0.274069	-1.16732	0.349974			0.033231	0.262515	0.97953	0.203244
	0.610815	-0.423225	-1.26051	0.355045			0.0396312	0.262846	1.01457	0.230553
	0.567939	-0.491061	-1.25849	0.415463			-0.0308033	0.206501	1.09046	0.232505
	0.518883	-0.596608	-1.17716	0.397519			-0.10542	0.139718	1.12297	0.270965
	0.535032	-0.718372	-1.07715	0.274803			-0.229851	0.164597	1.08433	0.323352
	0.612407	-0.840784	-0.976749	0.169998			-0.318053	0.227545	1.04984	0.297257
	0.671174	-1.05613	-0.900676	0.145763			-0.285286	0.263574	1.02837	0.218396
	0.646406	-1.25945	-0.888305	0.181923			-0.239903	0.294027	1.05046	0.176514
	0.542741	-1.3292	-0.926962	0.186636			-0.274704	0.335626	1.16844	0.167097
	0.447952	-1.05626	-0.978349	0.19792			-0.3082	0.340032	1.31929	0.169611
	0.440264	-0.760917	-1.04346	0.123926			-0.311287	0.338526	1.37046	0.208917
	0.506616	-0.539073	-1.09407	0.0517125			-0.358804	0.371616	1.32425	0.24521
	0.558145	-0.396601	-1.06711	0.0850232			-0.387771	0.345983	1.27095	0.226498
	0.545582	-0.475579	-0.962104	0.161153			-0.334435	0.216458	1.21719	0.223782
	0.483058	-0.7391	-0.900243	0.155284			-0.296741	0.130034	1.17025	0.280221
	0.413504	-0.870174	-0.930715	0.0721325			-0.34184	0.144662	1.18558	0.304728
	0.377909	-0.800613	-0.987631	-0.0104901			-0.380552	0.144761	1.23912	0.253767
	0.374363	-0.741527	-1.0131	-0.0619005			-0.318524	0.137622	1.24864	0.203312
	0.363707	-0.726966	-1.01449	-0.0407996			-0.301602	0.197854	1.24597	0.174949
	0.333227	-0.747498	-1.00689	0.0318334			-0.286537	0.256873	1.29994	0.151807
	0.327506	-0.911321	-1.01186	0.0470788			-0.243592	0.268258	1.336	0.169631
	0.386893	-1.12778	-1.12211	-0.025958			-0.257869	0.298801	1.29343	0.216665
	0.481395	-1.15414	-1.2645	-0.0671506			-0.31414	0.267207	1.21907	0.210305
	0.5329	-1.02122	-1.31686	-0.0346574			-0.262631	0.110944	1.15907	0.170846
	0.485023	-0.926543	-1.26496	0.00465247			-0.134166	-0.00903659	1.1276	0.19935
	0.356681	-0.810762	-1.17526	0.0261184			-0.082969	0.0430504	1.18209	0.274866
	0.195073	-0.638118	-1.06907	0.0500584			-0.0806939	0.171752	1.30802	0.316529
	0.0532002	-0.57571	-0.98628	0.0537499			-0.0599038	0.265755	1.3586	0.328426
	-0.0621937	-0.663682	-0.970806	0.0529275			-0.0753844	0.326127	1.30382	0.316111
	-0.174017	-0.757779	-0.987441	0.0792955			-0.159015	0.330398	1.25767	0.245691
	-0.267758	-0.908689	-0.991163	0.0945642			-0.218786	0.256563	1.27914	0.170024
	-0.269796	-1.14753	-1.01219	0.044794			-0.270046	0.253205	1.34982	0.16962
	-0.149864	-1.23418	-1.06459	0.014563			-0.360016	0.384652	1.4105	0.182339
	0.0488559	-1.09907	-1.08116	0.0724971			-0.372656	0.490129	1.43895	0.146207
	0.25457	-1.00913	-1.04433	0.161848			-0.249435	0.470779	1.38319	0.10027
	0.37169	-1.03662	-1.01969	0.204975			-0.141292	0.421499	1.29774	0.0900574
	0.347296	-0.970968	-1.01234	0.209581			-0.133932	0.365213	1.29375	0.0890287
	0.213498	-0.844692	-0.991807	0.172527			-0.115756	0.313654	1.33706	0.106743
	0.0506966	-0.791355	-0.976482	0.114646			-0.0927771	0.381464	1.30923	0.158894
	-0.0886393	-0.723093	-0.994123	0.112621			-0.120091	0.516074	1.25002	0.187251
	-0.162388	-0.653535	-0.992986	0.155725			-0.112088	0.542818	1.23466	0.182534
	-0.151738	-0.729184	-0.982046	0.144569			-0.0487163	0.521583	1.22378	0.210901
	-0.0751898	-0.798782	-0.996728	0.0656897			-0.0577623	0.590056	1.18773	0.264683
	0.0107416	-0.651405	-0.998714	0.011405			-0.129099	0.687564	1.14187	0.26141
	0.0317611	-0.45958	-0.952249	0.00777119			-0.130027	0.705145	1.05811	0.22402
	-0.0413515	-0.38677	-0.917568	0.034219			-0.110312	0.669756	0.93199	0.246316
	-0.162319	-0.309504	-0.920347	0.0659956			-0.142696	0.596077	0.884692	0.331571
	-0.240812	-0.259523	-0.916046	0.0588584			-0.13245	0.504776	0.933065	0.436769
	-0.218763	-0.379662	-0.956103	-0.00958612			-0.0420767	0.500092	0.96659	0.53719
	-0.115139	-0.500028	-1.07706	-0.0539132			0.000985241	0.631337	0.967491	0.572568
	0.00413395	-0.49199	-1.19159	-0.00019252			-0.0368365	0.738737	1.01222	0.504372
	0.079518	-0.589826	-1.21272	0.0876189			-0.0893953	0.697755	1.07947	0.41774
	0.108815	-0.893574	-1.17483	0.0949091			-0.209422	0.617189	1.08792	0.382961
	0.0932936	-1.08021	-1.12462	0.0276149			-0.387022	0.593694	1.0597	0.344469
	0.037839	-0.987831	-1.08391	-0.0404806			-0.46439	0.61477	0.996147	0.280345
	-0.0604445	-0.776709	-1.11626	-0.050412			-0.42208	0.664684	0.895082	0.261386
	-0.19279	-0.508181	-1.22877	0.0183316			-0.425798	0.752791	0.845845	0.298624
	-0.305703	-0.254944	-1.31864	0.136493			-0.471645	0.767544	0.927998	0.325183
	-0.334906	-0.252187	-1.34339	0.182207			-0.46021	0.709348	1.02844	0.311728
	-0.266734	-0.438089	-1.35585	0.120582			-0.438829	0.687038	1.03994	0.257949
	-0.178414	-0.517904	-1.34178	0.0539411			-0.468216	0.68195	1.02369	0.167171
	-0.161389	-0.525497	-1.24511	0.0703379			-0.453311	0.592639	1.03575	0.107743
	-0.251741	-0.629262	-1.11884	0.12231			-0.389096	0.467176	1.05537	0.15562
	-0.392818	-0.695613	-1.03012	0.157215			-0.374607	0.416655	1.08754	0.269019
	-0.512772	-0.615705	-0.97538	0.159741			-0.347917	0.441117	1.12486	0.337674
	-0.569469	-0.559876	-0.965843	0.107399			-0.253385	0.511333	1.07031	0.341582
	-0.552332	-0.556575	-1.03031	0.0251653			-0.204602	0.625865	0.932513	0.30577
	-0.499964	-0.47454	-1.09956	-0.0291059			-0.247179	0.723444	0.867764	0.23099
	-0.458893	-0.39394	-1.13281	-0.0627783			-0.260329	0.73843	0.923275	0.161618
	-0.451564	-0.456043	-1.18691	-0.136232			-0.219801	0.737637	1.01202	0.173041
	-0.469804	-0.524365	-1.28995	-0.211447			-0.21986	0.819621	1.07581	0.21431
	-0.520873	-0.510854	-1.37661	-0.190185			-0.214157	0.906829	1.10098	0.195285
	-0.573291	-0.608343	-1.40114	-0.0646801			-0.173744	0.92527	1.03546	0.169359
	-0.575723	-0.811917	-1.37062	0.0953624			-0.212339	0.945556	0.951036	0.223476
	-0.553868	-0.897528	-1.28382	0.245082			-0.34187	1.01065	0.970179	0.330498
	-0.555106	-0.848515	-1.18431	0.321798			-0.420789	1.09024	1.02681	0.432587
	-0.599247	-0.76027	-1.15966	0.285253			-0.442236	1.24338	0.995081	0.498388
	-0.670684	-0.513002	-1.21342	0.223183			-0.500669	1.44913	0.926883	0.476381
	-0.745397	-0.203509	-1.23106	0.232048			-0.517197	1.50635	0.935303	0.387849
	-0.784689	-0.192721	-1.18034	0.253129			-0.444203	1.3911	0.979061	0.342372
	-0.790393	-0.437858	-1.14362	0.235744			-0.385167	1.26722	1.01899	0.348862
	-0.804642	-0.58879	-1.15526	0.224197			-0.3721	1.20344	1.05151	0.305425
	-0.835845	-0.648282	-1.18599	0.247966			-0.324904	1.15403	1.04877	0.218716
	-0.850532	-0.726533	-1.21219	0.253336			-0.304106	1.16804	1.00779	0.216523
	-0.840734	-0.729257	-1.20619	0.24043			-0.383911	1.24265	1.01787	0.32665
	-0.831062	-0.675186	-1.16365	0.194909			-0.424125	1.27189	1.09672	0.456378
	-0.808121	-0.712937	-1.16879	0.0912886			-0.353392	1.24898	1.15189	0.533434
	-0.759126	-0.788957	-1.27873	-0.009797			-0.296607	1.2654	1.1753	0.513472
	-0.702899	-0.773651	-1.39634	-0.000133836			-0.312808	1.25358	1.21269	0.398386
	-0.6544	-0.772895	-1.43369	0.090726			-0.309363	1.10333	1.22578	0.302518
	-0.60531	-0.844515	-1.41704	0.16303			-0.300979	0.937383	1.16681	0.32081
	-0.581723	-0.771839	-1.43544	0.199784			-0.316186	0.884125	1.10984	0.354804
	-0.608593	-0.560347	-1.48037	0.215473			-0.247888	0.88666	1.09335	0.296876
	-0.654413	-0.497874	-1.50956	0.214454			-0.10862	0.924699	1.04875	0.196669
	-0.695965	-0.535056	-1.47951	0.250711			-0.0566658	1.0229	0.986891	0.126318
	-0.731224	-0.538534	-1.3547	0.363486			-0.100054	1.07831	0.966108	0.0962859
	-0.753721	-0.64476	-1.18838	0.458412			-0.117822	1.04049	0.975488	0.136271
	-0.78705	-0.903411	-1.1124	0.464647			-0.151982	1.05316	0.974687	0.228915
	-0.864692	-1.06709	-1.16084	0.4498			-0.250947	1.12292	1.02181	0.257496
	-0.959586	-1.11997	-1.20227	0.461776			-0.307802	1.12178	1.1307	0.206079
	-0.99926	-1.18751	-1.16876	0.444155			-0.294888	1.06109	1.22073	0.19861
	-0.972494	-1.14151	-1.11337	0.375712			-0.282434	1.01908	1.26274	0.280761
	-0.913212	-0.860858	-1.07808	0.27861			-0.227721	0.953657	1.26879	0.366433
	-0.865849	-0.559008	-1.07916	0.168696			-0.0735344	0.857723	1.21391	0.411409
	-0.845944	-0.382124	-1.12065	0.101267			0.0308096	0.840486	1.09487	0.431829
	-0.854729	-0.255357	-1.13515	0.155615			-0.0085381	0.877285	1.02969	0.415764
	-0.874999	-0.262564	-1.07721	0.273211			-0.0753013	0.854439	1.05258	0.393359
	-0.899073	-0.518884	-1.07729	0.3471			-0.0993865	0.787393	1.0957	0.413595
	-0.935803	-0.777973	-1.23925	0.363626			-0.139174	0.787935	1.14256	0.40715
	-0.974495	-0.82166	-1.43405	0.394674			-0.157155	0.828773	1.20952	0.3012
	-0.988355	-0.799684	-1.48783	0.437425			-0.0939035	0.838436	1.23396	0.185389
	-0.96622	-0.818561	-1.36144	0.472214			-0.0588833	0.832954	1.18409	0.148145
	-0.937969	-0.761262	-1.14334	0.498476			-0.0981027	0.780426	1.1537	0.129257
	-0.912883	-0.643966	-0.955102	0.516088			-0.113974	0.656935	1.16686	0.08839
	-0.890235	-0.543621	-0.928097	0.515274			-0.0983219	0.620322	1.1655	0.0601055
	-0.878828	-0.295915	-1.03164	0.538247			-0.147466	0.762484	1.17712	0.0434199
	-0.86902	0.089289	-1.09179	0.608899			-0.196787	0.924115	1.25936	0.0373847
	-0.841388	0.17224	-1.03613	0.659387			-0.175189	0.992716	1.34543	0.105065
	-0.792492	-0.188565	-0.971382	0.646968			-0.177854	1.02184	1.35819	0.224
	-0.737008	-0.678575	-0.944936	0.611868			-0.225558	0.991403	1.34266	0.274601
	-0.698824	-1.1514	-0.926666	0.575958			-0.217388	0.875749	1.29961	0.224419
	-0.702306	-1.54634	-0.925015	0.525936			-0.174313	0.758782	1.20076	0.147949
	-0.73388	-1.69005	-0.917894	0.489126			-0.204506	0.679718	1.10638	0.0851491
	-0.737538	-1.60863	-0.843334	0.484717			-0.252795	0.540024	1.06754	0.0484662
	-0.681882	-1.55845	-0.748948	0.462959			-0.259086	0.356089	0.981643	0.0672793
	-0.586323	-1.5794	-0.733976	0.400989			-0.303629	0.282224	0.817636	0.102673
	-0.532094	-1.49453	-0.748274	0.361526			-0.379133	0.361543	0.710656	0.0745909
	-0.568853	-1.29624	-0.702347	0.371122			-0.366069	0.482491	0.704296	0.0188892
	-0.669413	-1.11725	-0.643988	0.39462			-0.280867	0.572724	0.732245	0.028009
	-0.756014	-0.915489	-0.643117	0.416331			-0.238304	0.624785	0.770272	0.0639916
	-0.790321	-0.753454	-0.684873	0.452036			-0.180047	0.610271	0.812845	0.0465562
	-0.775772	-0.835923	-0.760214	0.456783			-0.0795302	0.607675	0.781072	-0.000295618
	-0.740116	-0.996588	-0.857087	0.417565			-0.065607	0.706264	0.726658	-0.0309386
	-0.717046	-0.917026	-0.894636	0.377233			-0.163087	0.776447	0.7644	-0.0358475
	-0.698885	-0.664358	-0.85852	0.369081			-0.248244	0.6692	0.841717	0.0169813
	-0.654183	-0.43461	-0.846309	0.37326			-0.315174	0.544121	0.84525	0.118058
	-0.570839	-0.212489	-0.857519	0.428784			-0.419853	0.561646	0.813253	0.163751
	-0.480879	-0.131829	-0.777797	0.522592			-0.465077	0.662586	0.798349	0.119378
	-0.410194	-0.42167	-0.603921	0.557347			-0.437202	0.787976	0.743607	0.0871822
	-0.3686	-0.803149	-0.467341	0.500247			-0.462337	0.922189	0.685641	0.114253
	-0.357437	-0.916365	-0.422527	0.429285			-0.525505	0.952614	0.703943	0.13705
	-0.3567	-0.836768	-0.482695	0.360396			-0.487491	0.85952	0.735073	0.112028
	-0.336512	-0.737982	-0.623864	0.275277			-0.385157	0.788991	0.71964	0.0582744
	-0.328007	-0.585847	-0.747218	0.23204			-0.327108	0.7896	0.7376	-0.0153708
	-0.401047	-0.459703	-0.76512	0.260687			-0.269646	0.768045	0.821799	-0.0672002
	-0.542117	-0.519018	-0.766238	0.286125			-0.239101	0.745543	0.869523	-0.0370237
	-0.680879	-0.629904	-0.836496	0.255226			-0.337226	0.793302	0.87063	0.0259421
	-0.794082	-0.633769	-0.87633	0.170767			-0.485703	0.844494	0.863541	0.0132592
	-0.877323	-0.671165	-0.776365	0.020317			-0.515956	0.80089	0.82461	-0.0611791
	-0.920524	-0.787093	-0.558097	-0.165106			-0.487288	0.737792	0.753605	-0.104408
	-0.929846	-0.79184	-0.332238	-0.286832			-0.503878	0.687071	0.730219	-0.120068
	-0.919016	-0.772237	-0.208335	-0.314336			-0.485295	0.597471	0.74361	-0.149116
	-0.87542	-0.921009	-0.241347	-0.30241			-0.431656	0.539478	0.71974	-0.186555
	-0.830113	-1.05482	-0.330459	-0.252781			-0.44369	0.580836	0.728453	-0.224743
	-0.814626	-1.00141	-0.289994	-0.13974			-0.488893	0.615227	0.828458	-0.240735
	-0.809128	-0.94411	-0.107654	-0.0156482			-0.485684	0.570339	0.934115	-0.161063
	-0.783157	-0.967965	0.0487645	0.0661709			-0.530291	0.546653	0.953629	0.0134343
	-0.752056	-0.946662	0.0761	0.155321			-0.649482	0.548198	0.934513	0.146887
	-0.726739	-0.931317	0.0338163	0.235125			-0.685952	0.530688	0.907255	0.172372
	-0.690678	-1.04499	-0.0128523	0.237249			-0.617128	0.560055	0.865444	0.173082
	-0.654525	-1.14527	-0.041562	0.155663			-0.561289	0.677418	0.851084	0.207857
	-0.633526	-1.15364	-0.0380677	0.0480676			-0.512591	0.769323	0.860855	0.258341
	-0.626884	-1.17731	-0.075842	-0.0923165			-0.428627	0.778059	0.819014	0.313691
	-0.609002	-1.12627	-0.224606	-0.225964			-0.412257	0.777098	0.735351	0.349967
	-0.572742	-0.821054	-0.401716	-0.281598			-0.479385	0.793594	0.748001	0.29854
	-0.511699	-0.421169	-0.453193	-0.27073			-0.505939	0.80175	0.893013	0.199686
	-0.418091	-0.196414	-0.400481	-0.255317			-0.496992	0.853869	1.08959	0.178852
	-0.322378	-0.0715817	-0.345089	-0.232952			-0.545164	0.987038	1.28476	0.229111
	-0.253863	0.0475222	-0.346211	-0.200098			-0.590683	1.07505	1.41711	0.233326
	-0.210423	0.0207213	-0.414603	-0.200004			-0.563502	1.01714	1.40875	0.180343
	-0.186471	-0.078587	-0.508908	-0.223519			-0.564312	0.923278	1.28476	0.123756
	-0.194896	-0.0481242	-0.526501	-0.198623			-0.620778	0.846232	1.17832	0.0733167
	-0.221537	-0.00197341	-0.463665	-0.128079			-0.639319	0.752611	1.09256	0.0587454
	-0.242555	-0.0948988	-0.466632	-0.0772414			-0.627842	0.688775	0.956776	0.100816
	-0.269882	-0.205563	-0.597316	-0.0503189			-0.654534	0.693673	0.799464	0.112329
	-0.293934	-0.29539	-0.726343	-0.00494967			-0.659895	0.685684	0.700242	0.0405445
	-0.29983	-0.527627	-0.724659	0.0467975			-0.617543	0.70222	0.657559	-0.0102394
	-0.285883	-0.778286	-0.611562	0.0958755			-0.63751	0.869686	0.657453	0.0186735
	-0.264858	-0.828278	-0.484505	0.157745			-0.69954	1.11012	0.724515	0.0500166
	-0.222623	-0.723042	-0.427439	0.188972			-0.680493	1.26614	0.791227	0.0545837
	-0.167481	-0.598446	-0.477535	0.156272			-0.596226	1.34128	0.809147	0.0793619
	-0.141198	-0.418369	-0.525943	0.105191			-0.541684	1.38783	0.857098	0.115929
	-0.178757	-0.240661	-0.429769	0.0922536			-0.468954	1.3446	1.00296	0.143198
	-0.26794	-0.222085	-0.229461	0.0854195			-0.360953	1.23508	1.14402	0.185496
	-0.360066	-0.279732	-0.0980737	0.0946836			-0.322197	1.1527	1.19941	0.206149
	-0.426376	-0.239822	-0.0863862	0.14541			-0.34347	1.08067	1.19565	0.128712
	-0.447031	-0.203593	-0.108215	0.214417			-0.342419	0.98274	1.12677	0.014947
	-0.432346	-0.302825	-0.124554	0.255885			-0.365293	0.97061	1.00055	-0.0333127
	-0.406766	-0.362601	-0.144964	0.3075			-0.475768	1.07788	0.910942	-0.0506439
	-0.371118	-0.29329	-0.205646	0.384239			-0.547186	1.15037	0.897831	-0.0973474
	-0.308375	-0.244967	-0.339809	0.434769			-0.518561	1.16471	0.885617	-0.140037
	-0.242186	-0.184856	-0.492756	0.428487			-0.496411	1.23323	0.89154	-0.182896
	-0.229107	-0.0460644	-0.474229	0.400991			-0.493377	1.30776	0.997484	-0.245225
	-0.284454	-0.0479277	-0.236502	0.36182			-0.436461	1.3116	1.1345	-0.250358
	-0.369957	-0.26003	0.0166066	0.319398			-0.377896	1.3064	1.21004	-0.150205
	-0.424266	-0.429007	0.0814159	0.319582			-0.401221	1.28528	1.25183	-0.0559466
	-0.413765	-0.492596	-0.00386183	0.346314			-0.418998	1.16122	1.29033	-0.0420204
	-0.368176	-0.604354	-0.119274	0.297054			-0.396372	1.05011	1.26414	-0.0466782
	-0.351989	-0.692599	-0.199498	0.172306			-0.407925	1.07593	1.21523	-0.0291841
	-0.397024	-0.658624	-0.1912	0.067467			-0.4209	1.15169	1.21264	0.00423408
	-0.462344	-0.640756	-0.150055	0.0146374			-0.35181	1.1876	1.20448	0.0677114
	-0.49098	-0.658753	-0.201501	-0.00499102			-0.268726	1.24963	1.15269	0.133836
	-0.460914	-0.50724	-0.299655	0.0298719			-0.246721	1.34042	1.14252	0.124905
	-0.408225	-0.236364	-0.282001	0.108354			-0.197071	1.38327	1.20601	0.0666976
	-0.363331	-0.0931346	-0.145552	0.175949			-0.140222	1.42857	1.25091	0.0651123
	-0.357872	-0.0896997	-0.0243817	0.261398			-0.190531	1.51891	1.27982	0.122065
	-0.406791	-0.12172	0.0140966	0.394032			-0.271225	1.55541	1.30716	0.152273
	-0.482048	-0.278649	-0.0577956	0.498221			-0.237326	1.50619	1.25731	0.128325
	-0.537337	-0.470141	-0.204799	0.474084			-0.182472	1.51348	1.11488	0.0670638
	-0.563369	-0.459444	-0.284943	0.352246			-0.223685	1.57044	1.00087	-0.0228519
	-0.572379	-0.376586	-0.215044	0.198517			-0.271135	1.55591	0.954558	-0.076736
	-0.556564	-0.42954	-0.118142	0.0862568			-0.300855	1.49667	0.898785	-0.0272458
	-0.522393	-0.429068	-0.132556	0.0700915			-0.376351	1.45629	0.850625	0.0624841
	-0.489342	-0.236098	-0.194408	0.140446			-0.438742	1.4002	0.849903	0.115302
	-0.479054	-0.0602438	-0.214814	0.180723			-0.421026	1.36562	0.863336	0.171019
	-0.500219	0.0362218	-0.185526	0.146015			-0.427836	1.43132	0.884253	0.270573
	-0.540807	0.216836	-0.13203	0.112474			-0.492945	1.48057	0.949017	0.336156
	-0.55746	0.40245	-0.0837707	0.140582			-0.498492	1.37892	0.978089	0.325395
	-0.522015	0.492266	-0.100615	0.20366			-0.476548	1.24078	0.88452	0.250422
	-0.467788	0.65639	-0.119178	0.292871			-0.538676	1.20396	0.78341	0.200004
	-0.440094	0.918911	0.00318564	0.389258			-0.622577	1.25896	0.775181	0.139393
	-0.450512	1.04477	0.215439	0.436672			-0.64672	1.34726	0.808419	0.115129
	-0.468477	1.06957	0.328091	0.429127			-0.701689	1.44897	0.82638	0.100871
	-0.470184	1.17791	0.304849	0.434811			-0.781252	1.48697	0.869559	0.00762643
	-0.454726	1.22876	0.243735	0.442493			-0.748019	1.42188	0.91247	-0.139466
	-0.428757	1.07915	0.207648	0.38767			-0.637197	1.35481	0.926003	-0.230085
	-0.415865	0.922249	0.236442	0.276327			-0.574893	1.32878	0.968745	-0.248808
	-0.407854	0.817928	0.321266	0.170605			-0.522959	1.23004	1.01983	-0.242749
	-0.382275	0.603452	0.352685	0.0935926			-0.424853	1.04597	0.966875	-0.207495
	-0.333834	0.428046	0.30868	0.049897			-0.384597	0.933402	0.825886	-0.161127
	-0.296986	0.494093	0.30865	0.0478542			-0.399881	0.95953	0.769711	-0.1596
	-0.27957	0.655776	0.403911	0.0406008			-0.387817	1.12213	0.839258	-0.162672
	-0.257342	0.746492	0.47269	0.00960996			-0.417362	1.42262	0.967776	-0.0940612
	-0.219737	0.886523	0.434984	0.0163501			-0.548697	1.75305	1.11862	0.00642616
	-0.173181	1.09153	0.35823	0.116455			-0.63068	1.89794	1.22658	0.0766235
	-0.134871	1.24599	0.347497	0.223847			-0.585193	1.87318	1.20879	0.149908
	-0.121035	1.42687	0.468193	0.284047			-0.545932	1.86128	1.12658	0.260796
	-0.154261	1.69116	0.708849	0.339761			-0.534764	1.88306	1.11327	0.386186
	-0.198871	1.77466	0.933855	0.415489			-0.469091	1.85748	1.14728	0.528511
	-0.186922	1.59572	0.968454	0.462248			-0.392811	1.80237	1.17148	0.661987
	-0.105608	1.456	0.860083	0.478816			-0.368432	1.74758	1.21991	0.69938
	0.0246777	1.49566	0.804598	0.471203			-0.306651	1.67234	1.29229	0.651391
	0.198263	1.58343	0.900662	0.442369			-0.200909	1.63034	1.33279	0.686134
	0.402838	1.69637	1.06525	0.458556			-0.173794	1.69319	1.3739	0.87431
	0.591695	1.84247	1.2002	0.594462			-0.182654	1.7707	1.49258	1.11046
	0.754398	1.83653	1.24936	0.766712			-0.128845	1.78424	1.62084	1.31136
	0.902421	1.66069	1.25182	0.8606			-0.0877077	1.82215	1.69468	1.47807
	1.01862	1.60001	1.34937	0.900379			-0.134746	1.92052	1.74078	1.58765
	1.10574	1.68005	1.58389	0.973824			-0.163111	1.93691	1.76917	1.65741
	1.18344	1.72945	1.78397	1.09427			-0.154244	1.86608	1.74115	1.76133
	1.24794	1.86853	1.79089	1.27549			-0.19661	1.79905	1.72606	1.8698
	1.27889	2.18827	1.67582	1.50594			-0.219781	1.7225	1.81244	1.91209
	1.29643	2.40898	1.61696	1.68833			-0.139414	1.66016	1.94649	1.95015
	1.29739	2.33591	1.69799	1.75262			-0.0544151	1.74854	2.07547	2.05658
	1.26085	2.17414	1.89713	1.77497			-0.0589491	1.94534	2.22173	2.17732
	1.21306	2.02383	2.12852	1.83518			-0.0644289	2.0454	2.36546	2.27642
	1.22492	1.9128	2.28712	1.91032			-0.055421	2.04803	2.43075	2.3887
	1.32122	1.9964	2.35275	2.00135			-0.0782425	2.06262	2.46954	2.48114
	1.48364	2.30272	2.45283	2.10649			-0.0399285	2.11028	2.54676	2.51395
	1.67557	2.58634	2.63369	2.18751			0.12294	2.20682	2.62793	2.5511
	1.84324	2.77555	2.77978	2.24995			0.267341	2.39853	2.71917	2.61554
	1.94839	3.0384	2.82586	2.37335			0.290346	2.54259	2.88564	2.63081
	1.98844	3.30754	2.83166	2.50073			0.303834	2.46458	3.08966	2.59203
	1.98257	3.38817	2.86695	2.52232			0.333721	2.29819	3.18664	2.58956
	1.93591	3.43234	2.9734	2.46084			0.311182	2.26045	3.16675	2.62765
	1.88952	3.57654	3.17589	2.43263			0.295259	2.33979	3.15703	2.66532
	1.91182	3.66946	3.36568	2.46499			0.354525	2.47174	3.18469	2.71462
	2.02111	3.72144	3.43171	2.54367			0.407684	2.65763	3.2815	2.76403
	2.17751	3.97038	3.4337	2.64323			0.440284	2.78754	3.4499	2.74702
	2.31855	4.34269	3.51511	2.71139			0.576958	2.75465	3.57782	2.71265
	2.39237	4.60489	3.65259	2.72693			0.757709	2.71982	3.52972	2.76347
	2.39163	4.78867	3.72087	2.7711			0.825127	2.7934	3.37543	2.84944
	2.39033	4.87502	3.65362	2.87793			0.807139	2.86846	3.22997	2.86427
	2.45166	4.7568	3.58701	2.98576			0.781924	2.87739	3.10225	2.83194
	2.54827	4.69228	3.56325	3.04747			0.699609	2.90042	3.0047	2.80806
	2.62225	4.92351	3.63916	3.09996			0.597567	2.9283	3.01388	2.79267
	2.6567	5.15509	3.78484	3.14492			0.604025	2.93569	3.1095	2.80776
	2.6901	5.12812	3.85285	3.17815			0.647859	2.98514	3.20306	2.84714
	2.73843	5.05416	3.82064	3.24281			0.605528	3.03779	3.28878	2.81203
	2.79892	5.1186	3.87007	3.34236			0.546477	2.97018	3.32945	2.68143
	2.83108	5.19171	4.06454	3.40967			0.558069	2.84243	3.24362	2.56659
	2.80369	5.25022	4.28718	3.43246			0.564315	2.82346	3.05953	2.52212
	2.73286	5.33889	4.44284	3.46496			0.567118	2.86617	2.92008	2.50125
	2.68864	5.36278	4.49067	3.49141			0.644889	2.8498	2.84429	2.50211
	2.69085	5.37021	4.40953	3.48642			0.710359	2.81011	2.77925	2.54071
	2.71443	5.61342	4.31406	3.4791			0.675406	2.80554	2.76513	2.56251
	2.7404	5.99505	4.33026	3.51476			0.638855	2.79095	2.82215	2.55604
	2.78159	6.12375	4.38256	3.56536			0.657552	2.79311	2.87088	2.58507
	2.87026	6.00478	4.36177	3.6144			0.623057	2.85805	2.88624	2.63638
	3.01489	5.85439	4.31675	3.65213			0.568484	2.8758	2.91242	2.62116
	3.16785	5.62995	4.34052	3.64524			0.609707	2.80101	2.88482	2.55487
	3.27191	5.38652	4.42359	3.57329			0.676107	2.80253	2.75997	2.50011
	3.30474	5.33162	4.56547	3.524			0.663972	2.95401	2.64754	2.45482
	3.29992	5.43774	4.7443	3.58114			0.633676	3.13245	2.59507	2.4168
	3.30375	5.51399	4.85419	3.71418			0.603704	3.25849	2.52866	2.42227
	3.3373	5.60419	4.85394	3.84431			0.486268	3.33341	2.45147	2.43584
	3.37252	5.77769	4.88062	3.94915			0.368361	3.29846	2.44912	2.40622
	3.38386	5.85901	5.0024	3.99031			0.365973	3.19911	2.47078	2.36653
	3.39909	5.7883	5.08625	3.97738			0.380584	3.17453	2.48198	2.33876
	3.45151	5.76946	5.04668	3.9789			0.312289	3.22351	2.55637	2.2536
	3.56393	5.84613	4.94537	3.99617			0.273193	3.23219	2.68518	2.10606
	3.71733	5.89419	4.84883	3.92825			0.312976	3.25895	2.74622	1.99957
	3.85467	6.02683	4.8405	3.79454			0.318575	3.40203	2.73232	1.98036
	3.91571	6.31582	4.98071	3.71799			0.317692	3.54247	2.72148	2.00897
	3.92938	6.5221	5.16522	3.7427			0.386942	3.52422	2.68246	2.06684
	3.95039	6.55174	5.24206	3.81811			0.457569	3.35626	2.62529	2.0774
	3.96814	6.63084	5.27594	3.88911			0.475839	3.08728	2.61571	2.03308
	3.95586	6.73636	5.39248	3.89747			0.531392	2.7852	2.60768	1.93979
	3.92158	6.70069	5.57078	3.80558			0.586562	2.66136	2.51562	1.90666
	3.87729	6.6411	5.7041	3.72184			0.520877	2.79399	2.41724	1.93141
	3.83	6.65389	5.74524	3.75744			0.432338	2.98831	2.38701	1.93389
	3.80394	6.59504	5.69018	3.86415			0.430468	3.08686	2.34741	1.92178
	3.80865	6.51708	5.59126	3.92491			0.428336	3.13932	2.27466	1.91733
	3.82436	6.61041	5.57378	3.95142			0.375199	3.1845	2.22742	1.8868
	3.84754	6.69417	5.6681	3.96988			0.375375	3.21695	2.20269	1.83904
	3.92055	6.76556	5.77963	3.96802			0.387239	3.28661	2.16416	1.8247
	4.04964	6.94375	5.81719	3.96792			0.295422	3.3381	2.17387	1.79872
	4.17718	7.24736	5.87896	3.98609			0.191767	3.21276	2.22658	1.72733
	4.26122	7.44311	6.00568	3.95993			0.171459	2.97689	2.18446	1.68057
	4.28777	7.51169	6.11116	3.91809			0.139816	2.87506	2.03612	1.70214
	4.26656	7.64036	6.13447	3.95381			0.0435204	2.94337	1.91965	1.73111
	4.24496	7.71092	6.08679	4.0437			-0.0109465	3.00118	1.91844	1.7514
	4.27042	7.61299	6.00136	4.07958			-0.0452639	2.99779	1.98855	1.78978
	4.31584	7.60135	5.96052	4.06906			-0.118127	2.96914	2.08854	1.79459
	4.33838	7.77151	6.03656	4.0496			-0.126748	2.93855	2.13435	1.72448
	4.35882	7.85737	6.13788	4.02611			-0.0415288	2.95793	2.05116	1.64932
	4.37975	7.7693	6.12994	4.01916			-0.00572999	3.05263	1.92612	1.60817
	4.4001	7.59703	6.04406	4.06692			-0.0304285	3.07386	1.89222	1.54784
	4.4358	7.27519	5.99268	4.10345			0.0279235	2.9435	1.92139	1.48152
	4.49092	6.94424	6.02135	4.08159			0.118251	2.84936	1.91037	1.47854
	4.5138	6.91953	6.10217	4.06893			0.129272	2.91227	1.89332	1.4955
	4.49693	7.1356	6.22381	4.11269			0.121545	3.03778	1.9075	1.4706
	4.49705	7.23617	6.34047	4.14635			0.137385	3.14245	1.92212	1.43971
	4.55518	7.21362	6.43436	4.10634			0.102368	3.24442	1.9353	1.41827
	4.65302	7.23639	6.56908	4.01754			0.0547465	3.28815	1.96286	1.37462
	4.73618	7.29679	6.76275	3.89098			0.0857613	3.25575	1.93979	1.3651
	4.7583	7.39389	6.86965	3.78012			0.0868491	3.26308	1.83226	1.44814
	4.70183	7.59019	6.79867	3.76476			-0.0323334	3.33002	1.74047	1.54388
	4.63647	7.73806	6.66732	3.81866			-0.145639	3.3303	1.69854	1.59526
	4.64566	7.64975	6.58189	3.81785			-0.145792	3.26886	1.64595	1.63908
	4.72588	7.49161	6.5921	3.76908			-0.104306	3.26743	1.57332	1.66353
	4.81397	7.48624	6.7232	3.77556			-0.0374723	3.28775	1.52646	1.62086
	4.85376	7.54106	6.89825	3.86323			0.0837421	3.23692	1.49104	1.57894
	4.81978	7.58679	6.95479	3.95792			0.154895	3.18091	1.46161	1.58538
	4.71354	7.73622	6.90958	3.99871			0.144395	3.13503	1.51608	1.5686
	4.59737	7.9761	6.92529	3.95791			0.186455	3.04803	1.63363	1.5076
	4.52579	8.14436	7.03128	3.88303			0.297799	3.01336	1.7032	1.48542
	4.51025	8.25346	7.13957	3.87535			0.323111	3.15093	1.70437	1.50736
	4.56155	8.32573	7.20445	3.98268			0.280605	3.30652	1.70763	1.51425
	4.675	8.21347	7.2296	4.07923			0.284956	3.32579	1.72687	1.51577
	4.80693	7.97232	7.24439	4.06004			0.292082	3.24463	1.69915	1.52968
	4.88743	7.87368	7.33238	3.96338			0.266608	3.11123	1.65957	1.50501
	4.89884	7.99782	7.51087	3.89115			0.293924	2.95616	1.60231	1.44396
	4.86381	8.20352	7.62717	3.86229			0.36573	2.92541	1.49878	1.39416
	4.82336	8.46073	7.58766	3.87956			0.374046	3.05147	1.42609	1.32562
	4.81113	8.71253	7.52085	3.91575			0.381434	3.11614	1.47965	1.21634
	4.86194	8.77667	7.54999	3.8894			0.465632	3.04024	1.57491	1.15962
	4.9806	8.56975	7.59793	3.80283			0.529785	3.00148	1.62309	1.19004
	5.12965	8.57297	7.60685	3.77631			0.519485	3.08868	1.66137	1.22854
	5.26541	8.65957	7.60368	3.86818			0.551776	3.18612	1.70129	1.26549
	5.3514	8.66734	7.58756	3.98989			0.629575	3.23166	1.69686	1.35712
	5.3646	8.73703	7.5949	4.0638			0.615283	3.18445	1.68566	1.4624
	5.31109	9.02721	7.70935	4.06464			0.54232	2.98155	1.71185	1.51007
	5.23833	9.2871	7.85633	4.00712			0.482681	2.77808	1.68957	1.52019
	5.18997	9.39815	7.87166	3.94962			0.372007	2.80583	1.61685	1.50608
	5.18803	9.43935	7.79959	3.95115			0.212888	2.9843	1.6023	1.45192
	5.23702	9.371	7.77251	3.95486			0.15674	3.0657	1.63804	1.39919
	5.30872	9.16946	7.81896	3.89827			0.197119	3.01428	1.61291	1.39445
	5.34873	9.10894	7.92288	3.85555			0.192911	2.90742	1.537	1.37404
	5.31441	9.26682	8.08547	3.94249			0.18037	2.76421	1.46773	1.30788
	5.22493	9.38418	8.21622	4.10596			0.213823	2.69094	1.35202	1.27608
	5.13475	9.38727	8.24089	4.22263			0.233688	2.75425	1.21138	1.32359
	5.08328	9.43778	8.25126	4.22977			0.254219	2.82877	1.12732	1.38844
	5.09262	9.51339	8.33522	4.12755			0.367104	2.80699	1.06765	1.43562
	5.17746	9.59988	8.42781	3.95163			0.450989	2.81917	0.954983	1.46607
	5.32605	9.86978	8.4497	3.83159			0.344271	2.91891	0.864746	1.44498
	5.48857	10.2358	8.42026	3.80755			0.178496	2.99207	0.861595	1.38472
	5.64255	10.3359	8.35507	3.79225			0.113241	3.00384	0.873867	1.36878
	5.73997	10.1622	8.28699	3.7351			0.107709	3.04783	0.875763	1.3928
	5.72477	10.0284	8.33167	3.70684			0.126382	3.09654	0.879041	1.37653
	5.61374	9.9208	8.47105	3.72444			0.229797	3.0745	0.844312	1.31577
	5.511	9.78395	8.53864	3.75302			0.335516	3.03986	0.780955	1.26712
	5.4843	9.78319	8.47304	3.77699			0.362528	2.98316	0.817148	1.23089
	5.53842	9.90252	8.40387	3.75342			0.415054	2.8506	0.931596	1.20739
	5.63393	9.93665	8.41028	3.66561			0.498389	2.76432	0.95336	1.22234
	5.68465	9.99617	8.5051	3.60844			0.462435	2.88062	0.859365	1.23955
	5.65162	10.2105	8.67783	3.69195			0.349115	3.08359	0.76102	1.18412
	5.59473	10.3501	8.82747	3.83655			0.339623	3.17558	0.70523	1.08391
	5.59766	10.3753	8.84737	3.89059			0.378316	3.13151	0.68198	1.0286
	5.65216	10.5779	8.78529	3.83503			0.362924	2.97271	0.720901	0.990943
	5.69374	10.8843	8.76168	3.7567			0.368972	2.76042	0.761216	1.01764
	5.67936	10.9976	8.7572	3.71046			0.413961	2.68268	0.728124	1.10453
	5.6119	10.9691	8.72098	3.73293			0.409555	2.817	0.699655	1.20168
	5.53938	10.9556	8.70917	3.80081			0.417175	2.94949	0.764267	1.21895
	5.50813	10.8722	8.77353	3.80936			0.52825	2.87046	0.858761	1.18385
	5.53623	10.7613	8.85638	3.71899			0.608983	2.6845	0.882768	1.15411
	5.59173	10.7661	8.90734	3.65344			0.575823	2.54593	0.85779	1.11115
	5.66203	10.7582	8.92587	3.65497			0.545555	2.4687	0.785472	1.06534
	5.76844	10.5994	8.88533	3.6403			0.56699	2.42714	0.659517	1.0879
	5.87773	10.5135	8.78326	3.57702			0.550239	2.41617	0.541794	1.15353
	5.94434	10.7585	8.78818	3.53637			0.512405	2.36371	0.481918	1.1892
	5.96893	11.0321	8.84768	3.54702			0.486793	2.32601	0.447682	1.21902
	5.9806	11.1551	8.83793	3.64289			0.361556	2.47109	0.45995	1.29035
	5.95822	11.2393	8.78167	3.81409			0.156576	2.73488	0.59466	1.35939
	5.88958	11.1492	8.79181	3.9404			0.0685962	2.86449	0.765734	1.39707
	5.77407	10.8386	8.87503	3.87904			0.127983	2.82076	0.814071	1.41098
	5.63627	10.6182	8.99033	3.67767			0.182442	2.72909	0.723409	1.35472
	5.54013	10.6053	9.08468	3.49923			0.230613	2.61551	0.605046	1.19383
	5.53426	10.6008	9.09773	3.40416			0.320241	2.55137	0.524534	1.03561
	5.59378	10.5897	9.01266	3.35727			0.378561	2.63199	0.52621	0.979387
	5.63956	10.702	8.91959	3.31655			0.413865	2.76923	0.63435	0.984441
	5.65337	10.8683	8.92216	3.24082			0.510921	2.81366	0.733838	0.997467
	5.68827	10.9843	8.98326	3.13366			0.585292	2.82865	0.700049	1.01221
	5.76854	11.1127	9.03334	3.10919			0.496279	2.92061	0.587117	0.985489
	5.84776	11.2007	9.08482	3.21649			0.368224	2.9968	0.527929	0.908285
	5.90659	11.0274	9.14719	3.32515			0.340452	2.99214	0.517213	0.881375
	5.95277	10.7449	9.18363	3.3225			0.335958	2.97243	0.513243	0.926804
	5.95876	10.6963	9.23004	3.2732			0.286125	2.93744	0.51683	0.941388
	5.92841	10.9047	9.31082	3.25245			0.240396	2.87117	0.496351	0.907848
	5.89253	11.1963	9.33905	3.26824			0.189508	2.88239	0.459203	0.910078
	5.84956	11.6225	9.29117	3.31252			0.111608	2.98786	0.492818	0.93504
	5.79544	12.1382	9.28195	3.34701			0.148854	2.99526	0.605311	0.945005
	5.76835	12.3848	9.33756	3.29386			0.310814	2.90575	0.629893	0.961318
	5.79109	12.2963	9.36956	3.20606			0.387865	2.88621	0.505179	0.956428
	5.85206	12.1424	9.35792	3.19151			0.308348	2.93325	0.341089	0.872168
	5.95682	11.9262	9.32243	3.25269			0.219341	2.92493	0.224935	0.77259
	6.10592	11.6376	9.25137	3.27906			0.180752	2.89393	0.167749	0.745341
	6.2594	11.5127	9.18043	3.24363			0.180076	2.86567	0.183677	0.754867
	6.35267	11.5596	9.18072	3.16448			0.296116	2.79872	0.232399	0.743029
	6.38282	11.5743	9.22716	3.06149			0.463659	2.79359	0.202089	0.692418
	6.37722	11.6201	9.25214	2.9882			0.490687	2.94632	0.138401	0.65887
	6.36548	11.8327	9.309	2.98954			0.392915	3.09726	0.162306	0.59069
	6.36635	12.0098	9.43572	3			0.355658	3.05711	0.2435	0.558712
	6.38139	12.0407	9.56981	2.97068			0.365764	2.89047	0.267023	0.619002
	6.37003	12.1526	9.65313	2.98842			0.303679	2.69929	0.251392	0.692394
	6.30762	12.3651	9.72896	3.10747			0.215	2.52785	0.250197	0.735317
	6.2455	12.396	9.79465	3.26282			0.13446	2.49045	0.239375	0.799335
	6.22273	12.2763	9.80465	3.39694			0.0321212	2.6119	0.252145	0.869666
	6.23864	12.2205	9.82214	3.48949			-0.0115844	2.69111	0.307379	0.880125
	6.28075	12.1755	9.88548	3.49141			0.091297	2.62212	0.312007	0.848409
	6.31823	12.1314	9.90993	3.42225			0.184096	2.58924	0.213981	0.812776
	6.31684	12.3047	9.86573	3.37022			0.13283	2.69419	0.135386	0.746818
	6.29506	12.5275	9.81289	3.33559			0.0696957	2.81562	0.138058	0.67423
	6.30551	12.4857	9.72035	3.25357			0.071669	2.90027	0.14017	0.647909
	6.35269	12.3563	9.57786	3.15428			0.0479427	2.91336	0.128389	0.629777
	6.39727	12.3826	9.49636	3.09719			-0.00804501	2.80639	0.121163	0.557051
	6.3964	12.3632	9.53139	3.07511			-0.0261131	2.65589	0.083092	0.483667
	6.35336	12.2431	9.63828	3.04322			-0.0617864	2.65317	0.0176625	0.481362
	6.29909	12.2153	9.81577	3.01053			-0.0985631	2.75644	0.0210916	0.525373
	6.25577	12.2284	10.0658	2.96801			-0.00747164	2.80388	0.0726223	0.578806
	6.23451	12.1852	10.2425	2.92083			0.147866	2.80123	0.0803354	0.646083
	6.21941	12.2602	10.2353	2.92315			0.174091	2.84099	0.0752116	0.694458
	6.20342	12.4836	10.1333	3.02604			0.0997484	2.86637	0.0937213	0.710511
	6.20332	12.5718	10.0409	3.15003			0.0733529	2.82814	0.0620956	0.747685
	6.26759	12.5216	9.9859	3.21298			0.0655791	2.79403	-0.0442442	0.807657
	6.38489	12.5977	9.99661	3.2298			0.0559347	2.75933	-0.109791	0.793067
	6.51911	12.7617	10.0562	3.25313			0.123593	2.69876	-0.118258	0.700144
	6.646	12.8255	10.0325	3.29818			0.221023	2.73095	-0.125513	0.629897
	6.725	12.9175	9.93312	3.3786			0.230291	2.90535	-0.0987543	0.626296
	6.73074	13.0534	9.92305	3.46479			0.223683	3.01199	-0.0159178	0.660829
	6.6941	12.9895	10.0461	3.47016			0.278358	2.96518	0.0317167	0.717648
	6.68576	12.8227	10.2017	3.40071			0.262382	2.90705	0.00581685	0.746359
	6.74329	12.8457	10.3519	3.36779			0.147075	2.91909	-0.0133723	0.685381
	6.86665	12.9323	10.4711	3.40442			0.0844884	2.98349	-0.0271181	0.586781
	7.00592	12.8694	10.4839	3.41993			0.102702	3.10971	-0.0671892	0.548313
	7.07271	12.7933	10.4166	3.35894			0.115395	3.18981	-0.101948	0.55373
	7.00443	12.8021	10.3523	3.25484			0.16596	3.04477	-0.132094	0.526045
	6.82813	12.7671	10.2964	3.14312			0.244569	2.78097	-0.227518	0.473864
	6.66207	12.7778	10.2318	3.0646			0.195616	2.67637	-0.341758	0.431653
	6.59991	12.9595	10.2146	3.06686			0.0475466	2.77549	-0.349619	0.402499
	6.66561	13.1506	10.2607	3.09325			-0.0189368	2.94217	-0.298214	0.417895
	6.8112	13.2223	10.3016	3.06233			0.000761069	3.07813	-0.298177	0.499427
	6.92996	13.3749	10.3398	3.01755			-0.00208808	3.13068	-0.354773	0.551377
	6.93537	13.5733	10.4366	3.05415			0.0256377	3.06521	-0.442024	0.505252
	6.85518	13.4765	10.5694	3.12224			0.0892308	3.02989	-0.583729	0.437681
	6.76795	13.1617	10.669	3.16895			0.0629388	3.14229	-0.696836	0.408485
	6.68214	12.9582	10.7437	3.19698			-0.0273914	3.25028	-0.688632	0.372017
	6.61306	12.8902	10.7924	3.19636			-0.0586866	3.16556	-0.643303	0.325986
	6.60157	12.9034	10.7554	3.13554			-0.0754875	3.00129	-0.641926	0.306368
	6.65142	13.1209	10.6774	3.07012			-0.160358	2.93812	-0.636934	0.288227
	6.73065	13.369	10.667	3.01134			-0.205468	2.97239	-0.59367	0.261738
	6.83007	13.3049	10.7228	2.90581			-0.180786	3.07378	-0.56055	0.288215
	6.91635	13.1278	10.7712	2.78448			-0.197988	3.17906	-0.50089	0.350741
	6.94075	13.0998	10.8223	2.74491			-0.232346	3.12608	-0.382658	0.376834
	6.90353	13.2211	10.8633	2.7787			-0.192086	2.90824	-0.277493	0.385052
	6.85507	13.2615	10.8727	2.81468			-0.147344	2.77428	-0.239677	0.435933
	6.83053	13.3436	10.9039	2.8416			-0.160975	2.82493	-0.234945	0.488535
	6.836	13.3936	11.0258	2.84826			-0.113082	2.92928	-0.26667	0.496485
	6.881	13.2284	11.1945	2.80734			-0.00348596	3.00499	-0.396129	0.482479
	6.9434	13.0904	11.3044	2.7848			0.0289788	3.03375	-0.552855	0.43262
	6.98568	13.1865	11.3233	2.84591			-0.0136408	2.96849	-0.630464	0.334117
	7.00544	13.3488	11.2606	2.89494			-0.0497816	2.8632	-0.633937	0.2751
	7.00908	13.4246	11.1463	2.83729			-0.143393	2.85502	-0.599491	0.309827
	6.96673	13.5002	11.0535	2.73796			-0.307443	2.88824	-0.530089	0.329981
	6.88035	13.5029	11.0874	2.67405			-0.401272	2.79557	-0.476636	0.274318
	6.8297	13.3647	11.17	2.63832			-0.405304	2.66996	-0.502741	0.218063
	6.83948	13.3226	11.2215	2.64022			-0.421923	2.69466	-0.528715	0.206205
	6.86507	13.5201	11.287	2.65538			-0.412308	2.82361	-0.49395	0.224229
	6.88773	13.7259	11.3832	2.62552			-0.293559	2.89838	-0.463104	0.288408
	6.907	13.8804	11.4055	2.57734			-0.179164	2.9315	-0.495134	0.374502
	6.92512	14.1846	11.3004	2.61511			-0.159364	2.89486	-0.544075	0.406834
	6.96852	14.4748	11.1331	2.69649			-0.159485	2.78921	-0.583318	0.409863
	7.05128	14.472	10.9587	2.71634			-0.198816	2.74549	-0.634212	0.458155
	7.10162	14.3601	10.8551	2.65022			-0.334036	2.80527	-0.663918	0.489186
	7.07338	14.3047	10.9127	2.54444			-0.443641	2.8048	-0.679162	0.424092
	6.9882	14.1758	11.0509	2.41738			-0.424528	2.69959	-0.751255	0.315344
	6.91044	14.0516	11.1118	2.32026			-0.39687	2.65278	-0.894705	0.204821
	6.88355	14.0781	11.082	2.30449			-0.417974	2.71047	-1.00557	0.178532
	6.90981	14.0942	11.0884	2.33673			-0.391445	2.80249	-1.05543	0.192762
	6.94821	14.0022	11.1559	2.36388			-0.332817	2.907	-1.10206	0.261915
	6.94509	14.0461	11.235	2.42851			-0.319107	2.96552	-1.12995	0.318855
	6.8967	14.2799	11.3092	2.56841			-0.298277	2.86003	-1.11312	0.318166
	6.83046	14.4228	11.3376	2.70396			-0.23616	2.66601	-1.09213	0.334247
	6.77775	14.3893	11.3005	2.75742			-0.254774	2.6077	-1.07763	0.40839
	6.74222	14.367	11.3074	2.74569			-0.352329	2.69602	-1.01014	0.481894
	6.73141	14.3514	11.4552	2.69807			-0.392569	2.79448	-0.938673	0.533159
	6.76032	14.3113	11.6384	2.63275			-0.389661	2.90552	-0.943965	0.571716
	6.80671	14.4154	11.7594	2.57357			-0.436093	3.04741	-0.973564	0.558883
	6.85177	14.67	11.864	2.50006			-0.469025	3.12625	-0.972419	0.503863
	6.88392	14.7508	11.9458	2.3531			-0.434119	3.15045	-0.982628	0.48289
	6.88231	14.6725	11.9272	2.15255			-0.426354	3.20229	-1.00868	0.472505
	6.84535	14.691	11.8322	1.99016			-0.433916	3.14711	-0.989868	0.363303
	6.81672	14.7876	11.693	1.90145			-0.370586	2.89411	-0.982071	0.239812
	6.8427	14.8513	11.4703	1.88422			-0.310744	2.61483	-1.04528	0.190442
	6.9182	14.9624	11.2527	1.92947			-0.347567	2.4811	-1.11594	0.208843
	6.99049	15.0153	11.1723	2.02012			-0.37258	2.46132	-1.143	0.256126
	7.00511	14.8127	11.2728	2.08563			-0.327707	2.46725	-1.18207	0.322108
	6.99468	14.6331	11.4035	2.1237			-0.332468	2.64448	-1.23996	0.3691
	7.00805	14.8092	11.5517	2.18185			-0.394248	2.78221	-1.25536	0.358911
	7.05601	15.1298	11.7081	2.24182			-0.416697	2.8544	-1.26466	0.360379
	7.10274	15.2286	11.785	2.22211			-0.413327	2.98004	-1.2959	0.431789
	7.10362	15.2061	11.7965	2.14913			-0.427472	3.12878	-1.285	0.510223
	7.05113	15.187	11.8241	2.09857			-0.37297	3.13297	-1.23022	0.531787
	7.01013	15.1002	11.8481	2.06963			-0.271127	3.03649	-1.24258	0.532642
	7.04251	15.0864	11.8051	2.03115			-0.272605	2.99753	-1.32114	0.521571
	7.12637	15.27	11.7306	1.96838			-0.385351	3.01269	-1.38446	0.471486
	7.22962	15.3303	11.7406	1.84295			-0.373926	3.04056	-1.45031	0.405784
	7.3385	15.1335	11.7225	1.69434			-0.369962	3.09255	-1.50386	0.348307
	7.42135	15.0102	11.7183	1.66297			-0.448027	3.06705	-1.45767	0.272974
	7.45279	15.0156	11.7928	1.77681			-0.478151	2.86032	-1.35079	0.218904
	7.44621	14.9217	11.8716	1.90052			-0.421285	2.63047	-1.33541	0.267469
	7.4271	14.8767	11.888	1.96429			-0.383133	2.55164	-1.40076	0.380066
	7.40252	14.9558	11.9199	2.01127			-0.341221	2.55447	-1.45383	0.451067
	7.38062	14.8268	11.9736	2.0592			-0.248224	2.56234	-1.49347	0.467105
	7.37758	14.4612	11.9877	2.09548			-0.216741	2.61927	-1.49785	0.465005
	7.39129	14.264	11.9907	2.12688			-0.301157	2.72669	-1.42161	0.445214
	7.38518	14.2819	12.026	2.11233			-0.354001	2.82299	-1.32756	0.429721
	7.35612	14.3683	12.0495	2.00106			-0.359432	2.92161	-1.33764	0.449982
	7.33453	14.5868	12.0185	1.87736			-0.415893	2.97327	-1.40326	0.459067
	7.32961	14.8963	11.9745	1.82806			-0.473487	2.88116	-1.44151	0.410243
	7.35563	15.0042	11.9265	1.81151			-0.465827	2.69566	-1.47247	0.375083
	7.40891	14.9452	11.8577	1.74839			-0.490866	2.61592	-1.49809	0.417975
	7.42362	15.0185	11.8148	1.67371			-0.580137	2.66298	-1.47886	0.484581
	7.35027	15.1478	11.8236	1.60956			-0.586681	2.70696	-1.44374	0.522847
	7.25214	15.1546	11.8138	1.57553			-0.511512	2.73276	-1.45525	0.561343
	7.17777	15.2338	11.7539	1.63031			-0.468345	2.7763	-1.46835	0.596739
	7.13377	15.4397	11.7368	1.76637			-0.417224	2.81384	-1.48676	0.624288
	7.13406	15.4296	11.7913	1.85266			-0.301611	2.88495	-1.57878	0.685316
	7.16777	15.2276	11.8713	1.83998			-0.239972	3.06013	-1.7091	0.764464
	7.18016	15.1443	11.9639	1.81251			-0.27494	3.19148	-1.77138	0.754884
	7.16812	15.1129	12.0617	1.81119			-0.294227	3.10699	-1.77068	0.663147
	7.189	15.0237	12.0898	1.81471			-0.320182	2.92409	-1.79948	0.599468
	7.25051	15.087	12.0508	1.82841			-0.397579	2.81287	-1.83036	0.593333
	7.3167	15.2469	12.0463	1.83373			-0.413085	2.75911	-1.83506	0.602019
	7.35231	15.2243	12.0775	1.78799			-0.325813	2.7241	-1.83288	0.618949
	7.35324	15.1425	12.0798	1.72864			-0.29436	2.71582	-1.80423	0.63638
	7.34317	15.2243	12.0523	1.73747			-0.336104	2.66449	-1.70536	0.610509
	7.36385	15.302	12.0191	1.7766			-0.314183	2.54981	-1.60935	0.596435
	7.44849	15.2776	11.9665	1.77495			-0.253451	2.50716	-1.6217	0.65401
	7.56258	15.2948	11.9341	1.76066			-0.238821	2.58958	-1.70862	0.701148
	7.65956	15.3319	11.9913	1.78441			-0.235925	2.6861	-1.81147	0.657898
	7.7201	15.1859	12.0901	1.80911			-0.245395	2.75093	-1.90888	0.600971
	7.72977	15.0149	12.1404	1.78993			-0.365847	2.87071	-1.96246	0.618306
	7.67588	15.0455	12.1573	1.72343			-0.518651	3.01701	-1.92755	0.696894
	7.60328	15.1473	12.202	1.57859			-0.54435	3.14011	-1.87429	0.819467
	7.57522	15.1763	12.2665	1.3934			-0.5022	3.27129	-1.86516	0.956639
	7.57147	15.2754	12.3433	1.2797			-0.506181	3.35532	-1.85656	1.01275
	7.57327	15.4323	12.4404	1.28251			-0.502952	3.23548	-1.84471	0.979195
	7.57952	15.3971	12.5076	1.30075			-0.464092	3.00485	-1.89154	0.957008
	7.58717	15.253	12.4743	1.27614			-0.484101	2.90579	-1.98461	0.958231
	7.57765	15.1779	12.4364	1.23688			-0.517543	2.94036	-2.03117	0.900315
	7.55927	15.0531	12.4508	1.21099			-0.478553	2.99548	-2.03977	0.818974
	7.54174	14.8919	12.4203	1.22065			-0.452118	3.05782	-2.04792	0.799858
	7.52859	14.9032	12.318	1.30665			-0.499343	3.08724	-2.03894	0.848994
	7.54042	14.9778	12.2212	1.43352			-0.515165	3.00947	-2.02729	0.953725
	7.58367	14.8591	12.1596	1.50371			-0.48091	2.90911	-2.07371	1.10457
	7.63344	14.677	12.1329	1.4999			-0.503993	2.86933	-2.13708	1.17955
	7.64665	14.6564	12.1923	1.47801			-0.538861	2.78985	-2.11613	1.08371
	7.63554	14.7084	12.3137	1.4265			-0.505649	2.65027	-2.05967	0.926384
	7.65729	14.7557	12.3783	1.32515			-0.465632	2.61119	-2.04763	0.852444
	7.72719	14.8944	12.381	1.22524			-0.460156	2.72752	-2.05157	0.847982
	7.81758	15.029	12.4174	1.16619			-0.393029	2.87026	-2.05186	0.835115
	7.88841	14.9077	12.4905	1.12424			-0.291838	2.98448	-2.08943	0.842782
	7.88941	14.7086	12.5542	1.11029			-0.303216	3.04691	-2.12748	0.800468
	7.80809	14.6664	12.6483	1.10932			-0.384928	2.95795	-2.11723	0.712872
	7.72047	14.6723	12.7708	1.02949			-0.42907	2.78603	-2.13638	0.689598
	7.68499	14.6749	12.8413	0.854554			-0.470224	2.73302	-2.20196	0.757396
	7.68491	14.8888	12.8791	0.700482			-0.532127	2.79783	-2.23447	0.815191
	7.70172	15.1852	12.9287	0.638609			-0.511342	2.80283	-2.22239	0.830708
	7.72976	15.2701	12.9234	0.636486			-0.435516	2.75578	-2.22933	0.854445
	7.75244	15.2639	12.8432	0.682477			-0.40875	2.71397	-2.2208	0.871546
	7.73733	15.2811	12.8158	0.743905			-0.361369	2.64422	-2.16711	0.852146
	7.66623	15.1191	12.8639	0.753429			-0.237974	2.56407	-2.15084	0.820682
	7.55297	14.885	12.8777	0.697799			-0.167814	2.54598	-2.18546	0.764004
	7.46067	14.9041	12.8428	0.652011			-0.223821	2.51145	-2.19582	0.657054
	7.42839	15.0903	12.7971	0.635121			-0.287204	2.37827	-2.17713	0.56837
	7.45776	15.2387	12.7395	0.630106			-0.340183	2.26154	-2.20309	0.586362
	7.50436	15.4425	12.6976	0.656804			-0.438627	2.22226	-2.23991	0.660359
	7.51215	15.6854	12.7602	0.720875			-0.503065	2.14609	-2.25332	0.710562
	7.47068	15.7187	12.8599	0.755932			-0.474578	2.00349	-2.29558	0.741053
	7.40963	15.6604	12.8426	0.73405			-0.444877	1.91639	-2.35763	0.773339
	7.34658	15.8205	12.7085	0.702135			-0.455543	1.92366	-2.37115	0.779168
	7.2898	16.0242	12.5678	0.68024			-0.404573	2.01029	-2.36608	0.766422
	7.24997	15.9519	12.487	0.666258			-0.336003	2.21902	-2.4016	0.7507
	7.19488	15.8209	12.5251	0.705652			-0.34871	2.46993	-2.38794	0.690411
	7.12212	15.764	12.7302	0.787403			-0.371963	2.57462	-2.26971	0.584225
	7.10053	15.5747	12.9785	0.837528			-0.365347	2.54772	-2.14008	0.528602
	7.17053	15.3625	13.1114	0.841979			-0.446355	2.55926	-2.06506	0.566094
	7.29328	15.3754	13.1386	0.868203			-0.588584	2.59974	-2.04721	0.629537
	7.40416	15.416	13.121	0.91839			-0.624955	2.5825	-2.11569	0.680098
	7.47635	15.3704	13.0402	0.959264			-0.574678	2.55127	-2.25438	0.731299
	7.5273	15.4047	12.948	1.0073			-0.542018	2.4772	-2.33235	0.758949
	7.60973	15.4346	12.9514	1.06792			-0.470926	2.31572	-2.34003	0.763462
	7.72275	15.2535	12.9955	1.09802			-0.357674	2.18139	-2.37879	0.790849
	7.7918	15.1252	13.0286	1.09049			-0.328885	2.21844	-2.45283	0.818439
	7.75725	15.2867	13.0758	1.09039			-0.367365	2.32997	-2.48241	0.774455
	7.64326	15.5564	13.1356	1.08797			-0.360456	2.37717	-2.47344	0.685433
	7.55089	15.7709	13.1435	1.0652			-0.358543	2.3751	-2.47148	0.59191
	7.50829	16.0115	13.1331	1.04666			-0.410841	2.36163	-2.46409	0.568891
	7.48351	16.164	13.1718	1.0502			-0.429504	2.33282	-2.49114	0.546216
	7.45586	15.9815	13.2141	1.02919			-0.402829	2.35874	-2.59226	0.529103
	7.43403	15.6671	13.2399	0.98634			-0.440344	2.48093	-2.69158	0.505696
	7.42253	15.5116	13.2925	0.96367			-0.502193	2.55427	-2.68484	0.466878
	7.43687	15.4159	13.3458	0.923836			-0.487529	2.50668	-2.6167	0.504039
	7.48123	15.325	13.3079	0.823499			-0.486442	2.48259	-2.55392	0.655933
	7.51175	15.4013	13.2175	0.728833			-0.564342	2.53392	-2.47781	0.795988
	7.50973	15.5777	13.1823	0.697372			-0.608773	2.53852	-2.41305	0.818637
	7.49655	15.6472	13.2111	0.695978			-0.59675	2.47117	-2.39672	0.789023
	7.50311	15.7199	13.2786	0.694423			-0.641099	2.40207	-2.38308	0.775229
	7.54586	15.8788	13.3888	0.707029			-0.680843	2.33565	-2.33964	0.772368
	7.62265	15.8691	13.4991	0.708626			-0.636643	2.35643	-2.3513	0.790326
	7.69681	15.7298	13.5489	0.717638			-0.608016	2.56679	-2.43478	0.812129
	7.70964	15.7509	13.5882	0.799526			-0.654621	2.83064	-2.48534	0.768936
	7.65514	15.8533	13.6671	0.923393			-0.69543	2.91758	-2.48598	0.678655
	7.59103	15.7807	13.7243	0.961009			-0.741756	2.82889	-2.50823	0.627848
	7.56644	15.7059	13.7082	0.906873			-0.853818	2.70148	-2.55933	0.606182
	7.55442	15.7656	13.6738	0.851644			-0.911233	2.5686	-2.58964	0.555724
	7.53244	15.7942	13.6599	0.810641			-0.848353	2.48794	-2.60426	0.520085
	7.51015	15.7262	13.6331	0.767661			-0.791261	2.53295	-2.57388	0.526613
	7.46856	15.6808	13.5897	0.768107			-0.808778	2.65414	-2.46619	0.50179
	7.43109	15.5664	13.5327	0.831308			-0.813037	2.7404	-2.36709	0.435122
	7.45508	15.2959	13.4332	0.903405			-0.806548	2.85512	-2.39377	0.406207
	7.50774	15.023	13.3231	0.975897			-0.8701	3.02149	-2.502	0.413301
	7.49889	15.1314	13.3016	1.01929			-0.925524	3.0604	-2.57539	0.419851
	7.43255	15.2416	13.3561	0.941571			-0.917007	2.89368	-2.60519	0.464409
	7.36156	15.256	13.3688	0.736876			-0.945204	2.66889	-2.58744	0.537946
	7.33551	15.3272	13.3378	0.536216			-1.03705	2.49264	-2.5251	0.554977
	7.38527	15.3224	13.3225	0.422347			-1.08121	2.39512	-2.47973	0.517512
	7.47363	15.1239	13.3176	0.398426			-1.0955	2.44828	-2.48088	0.505847
	7.49535	14.9833	13.3019	0.454713			-1.14582	2.59331	-2.4313	0.504484
	7.40519	14.9768	13.3306	0.522479			-1.12419	2.66169	-2.29656	0.489065
	7.26584	14.9197	13.392	0.513415			-1.00413	2.6864	-2.20086	0.502563
	7.1489	14.8859	13.4221	0.493672			-0.925869	2.82223	-2.20803	0.52908
	7.08863	15.0048	13.4556	0.58967			-0.940832	3.01466	-2.26552	0.476343
	7.09442	15.1243	13.5365	0.767391			-0.96294	3.07703	-2.32687	0.360515
	7.16532	15.1601	13.6113	0.878964			-0.984636	2.90453	-2.38619	0.26712
	7.27162	15.3269	13.6281	0.879976			-1.01378	2.70536	-2.41891	0.206091
	7.37318	15.5812	13.6151	0.798899			-0.957184	2.46892	-2.45624	0.168383
	7.47217	15.6302	13.5486	0.676771			-0.840911	2.31832	-2.57812	0.177787
	7.57078	15.4999	13.4176	0.564228			-0.828617	2.34889	-2.71356	0.191891
	7.66055	15.4398	13.3375	0.480371			-0.928217	2.41809	-2.7303	0.162545
	7.75968	15.3659	13.3929	0.358859			-0.98106	2.35404	-2.64757	0.146912
	7.86308	15.2502	13.5189	0.191505			-0.987606	2.27653	-2.60731	0.219954
	7.89875	15.3415	13.6151	0.0735284			-1.01803	2.29928	-2.63917	0.32558
	7.84967	15.6085	13.7266	0.0217683			-1.01587	2.3739	-2.71439	0.407434
	7.77977	15.6971	13.7427	-0.0299092			-0.983946	2.4777	-2.81182	0.476058
	7.71405	15.6166	13.6203	-0.081952			-1.02814	2.6152	-2.86584	0.515401
	7.67492	15.524	13.47	-0.08741			-1.09784	2.64241	-2.85978	0.499862
	7.68449	15.3164	13.387	-0.0278272			-1.07627	2.54324	-2.89386	0.480268
	7.73047	15.0731	13.3515	0.055609			-1.05722	2.50924	-3.00461	0.484696
	7.7724	15.0495	13.3621	0.135775			-1.11099	2.55588	-3.04008	0.441694
	7.82414	15.1214	13.4559	0.167723			-1.12998	2.53344	-2.93597	0.351735
	7.89782	15.0317	13.5186	0.121203			-1.08645	2.44551	-2.78982	0.309075
	7.98331	14.9259	13.4606	0.0562382			-1.07121	2.38865	-2.68685	0.341902
	8.05612	15.0078	13.3621	0.0576094			-1.06522	2.33574	-2.642	0.394071
	8.06664	15.16	13.3031	0.114834			-1.02069	2.28465	-2.66478	0.442801
	7.99588	15.2856	13.2736	0.159764			-1.03867	2.3204	-2.69671	0.460757
	7.874	15.4522	13.3162	0.157223			-1.1295	2.37842	-2.62406	0.406921
	7.77006	15.5706	13.462	0.0863521			-1.1563	2.33886	-2.50315	0.319128
	7.73114	15.49	13.5921	-0.0493726			-1.09752	2.28551	-2.48956	0.281829
	7.73663	15.3805	13.6192	-0.177785			-1.08147	2.33517	-2.58889	0.28402
	7.7441	15.4198	13.5851	-0.220917			-1.10095	2.37869	-2.67376	0.274914
	7.74401	15.4059	13.5173	-0.222175			-1.09144	2.34807	-2.70917	0.268938
	7.76172	15.3072	13.4202	-0.227904			-1.11798	2.34238	-2.71898	0.284769
	7.73358	15.3461	13.4231	-0.209871			-1.18081	2.35058	-2.70283	0.287764
	7.70655	15.5202	13.6005	-0.146152			-1.16019	2.31281	-2.72903	0.289975
	7.69209	15.5276	13.7999	-0.0943591			-1.07911	2.30425	-2.81585	0.318497
	7.70234	15.495	13.8581	-0.0855122			-1.06786	2.35271	-2.84225	0.343144
	7.74107	15.4729	13.7816	-0.118811			-1.06346	2.32384	-2.74152	0.312934
	7.77661	15.2386	13.6436	-0.22082			-0.995662	2.24736	-2.6677	0.282885
	7.77779	14.9193	13.5358	-0.354349			-0.959374	2.27298	-2.72598	0.295039
	7.74286	14.8573	13.5965	-0.410946			-0.973036	2.40835	-2.83212	0.314058
	7.71512	14.9803	13.8356	-0.372558			-0.949766	2.55494	-2.90756	0.338386
	7.73621	15.0624	14.0756	-0.346156			-0.938363	2.68276	-2.93279	0.391734
	7.82155	15.1558	14.2182	-0.383301			-1.02189	2.72262	-2.89989	0.42238
	7.93652	15.2755	14.3103	-0.443719			-1.08109	2.57535	-2.86312	0.396253
	8.05058	15.2453	14.3423	-0.487496			-1.04687	2.36282	-2.94686	0.373947
	8.12955	15.1266	14.2322	-0.471507			-1.01852	2.30618	-3.08659	0.369616
	8.11738	15.0899	14.0277	-0.358879			-1.02133	2.38158	-3.10253	0.316847
	8.02613	15.006	13.8119	-0.219743			-0.960194	2.43214	-2.99686	0.21586
	7.94781	14.7691	13.6175	-0.165609			-0.858497	2.46396	-2.90904	0.141223
	7.9286	14.6684	13.4943	-0.175159			-0.822868	2.52359	-2.89282	0.101083
	7.94659	14.8355	13.5105	-0.17368			-0.801219	2.55733	-2.94453	0.0952455
	7.97277	15.0071	13.6325	-0.183503			-0.785259	2.61075	-3.06363	0.168987
	7.96751	15.1515	13.7775	-0.214555			-0.87968	2.74908	-3.13827	0.29632
	7.91372	15.4092	13.9332	-0.241377			-1.0447	2.86465	-3.08799	0.371855
	7.8602	15.5642	14.0576	-0.286875			-1.12046	2.86282	-2.99833	0.380682
	7.84927	15.4297	14.0698	-0.378751			-1.15345	2.84857	-2.9507	0.3817
	7.8745	15.2704	13.9893	-0.447246			-1.24643	2.85121	-2.90962	0.368311
	7.91823	15.1353	13.9318	-0.486523			-1.30311	2.76709	-2.85203	0.326953
	7.98745	14.92	13.9257	-0.496004			-1.27826	2.61512	-2.81856	0.317795
	8.06881	14.8273	13.9435	-0.49295			-1.25482	2.47226	-2.77259	0.35039
	8.12295	14.9971	14.0075	-0.422426			-1.22688	2.33517	-2.71222	0.389552
	8.13716	15.199	14.0841	-0.337336			-1.14939	2.21429	-2.72053	0.464037
	8.13362	15.3076	14.0835	-0.316852			-1.13046	2.23034	-2.82687	0.598601
	8.11511	15.4608	13.9867	-0.337801			-1.21825	2.34996	-2.92025	0.696405
	8.0706	15.58	13.856	-0.37209			-1.25736	2.43121	-2.94565	0.700848
	8.02877	15.4233	13.7248	-0.42822			-1.20195	2.47247	-2.97654	0.672024
	7.97313	15.1412	13.6347	-0.477356			-1.16533	2.55734	-3.06001	0.664175
	7.87128	14.928	13.6791	-0.484144			-1.15682	2.57646	-3.08358	0.647351
	7.76342	14.6882	13.8549	-0.491232			-1.09842	2.46166	-3.03998	0.635026
	7.71151	14.4956	14.0458	-0.511687			-1.05388	2.34569	-2.9633	0.625385
	7.70848	14.6377	14.1506	-0.474578			-1.07325	2.29206	-2.88291	0.556376
	7.75747	15.0161	14.1743	-0.376056			-1.0606	2.25626	-2.88376	0.464861
	7.8356	15.2993	14.0959	-0.293931			-1.03569	2.28781	-3.00643	0.465972
	7.8527	15.4995	13.9346	-0.256169			-1.10582	2.41367	-3.13407	0.530313
	7.7842	15.6579	13.8076	-0.257135			-1.19565	2.49212	-3.17571	0.524823
	7.69377	15.5218	13.7787	-0.322482			-1.18068	2.45657	-3.19245	0.449848
	7.63535	15.1683	13.8045	-0.418298			-1.15404	2.42864	-3.26094	0.386539
	7.62179	14.9673	13.876	-0.449643			-1.16364	2.42584	-3.341	0.356741
	7.66342	14.905	14.0157	-0.422462			-1.13167	2.38741	-3.37986	0.378669
	7.73029	14.8509	14.1365	-0.399447			-1.09902	2.36676	-3.34963	0.466111
	7.75895	14.9174	14.1666	-0.3877			-1.15839	2.41401	-3.22297	0.529664
	7.72861	15.156	14.1394	-0.358588			-1.21876	2.4384	-3.06121	0.505387
	7.65709	15.3526	14.0785	-0.339039			-1.18745	2.42848	-3.01186	0.470376
	7.57496	15.4608	13.9952	-0.325522			-1.15318	2.50913	-3.12733	0.483529
	7.509	15.5974	14.0054	-0.27868			-1.15722	2.63669	-3.25825	0.483188
	7.50521	15.7004	14.1706	-0.221875			-1.14082	2.68976	-3.30794	0.45055
	7.59253	15.6129	14.3311	-0.226565			-1.1178	2.72646	-3.31695	0.421096
	7.73143	15.4562	14.3535	-0.29927			-1.13889	2.85831	-3.34402	0.388483
	7.8605	15.3084	14.2875	-0.404841			-1.1173	3.00106	-3.40641	0.349571
	7.93127	15.0346	14.2339	-0.541133			-1.01434	3.10167	-3.51434	0.358202
	7.91907	14.7433	14.2384	-0.66642			-0.966726	3.18937	-3.59378	0.383341
	7.84368	14.6758	14.3239	-0.70806			-0.993345	3.15992	-3.54252	0.329852
	7.79454	14.6637	14.4287	-0.682673			-0.969739	2.96247	-3.44656	0.228982
	7.80644	14.5162	14.4079	-0.660529			-0.91297	2.79803	-3.44035	0.189935
	7.83661	14.4454	14.2807	-0.644071			-0.914283	2.79074	-3.49275	0.212265
	7.83224	14.563	14.2085	-0.617742			-0.899885	2.83101	-3.50306	0.244533
	7.7797	14.666	14.2346	-0.6265			-0.841699	2.86644	-3.49205	0.285945
	7.70863	14.7468	14.2462	-0.670543			-0.852073	2.92028	-3.49921	0.304052
	7.66332	14.9391	14.2365	-0.696035			-0.915563	2.90451	-3.51692	0.256456
	7.6612	15.1117	14.261	-0.698929			-0.958036	2.78817	-3.5738	0.203107
	7.6818	15.1274	14.311	-0.696726			-1.04747	2.70956	-3.65458	0.209688
	7.68603	15.1735	14.3694	-0.657459			-1.24176	2.69607	-3.64029	0.220778
	7.6558	15.2723	14.4243	-0.572948			-1.38257	2.60117	-3.50398	0.200383
	7.61699	15.1731	14.399	-0.527275			-1.37876	2.4391	-3.42747	0.207239
	7.58917	14.9412	14.2775	-0.553226			-1.32636	2.34091	-3.50088	0.262798
	7.54214	14.7957	14.2274	-0.602317			-1.29765	2.29596	-3.61422	0.328009
	7.47807	14.6787	14.3256	-0.637279			-1.28038	2.25926	-3.67792	0.406143
	7.45337	14.495	14.4432	-0.656908			-1.31344	2.30923	-3.6546	0.481426
	7.51121	14.4432	14.4776	-0.622997			-1.39948	2.43555	-3.56081	0.482335
	7.64778	14.4874	14.4555	-0.552151			-1.3858	2.48974	-3.45165	0.411532
	7.82198	14.3602	14.4124	-0.525725			-1.26133	2.50669	-3.53239	0.363072
	7.94842	14.1942	14.3908	-0.547461			-1.19787	2.57233	-3.68526	0.34375
	7.97278	14.2509	14.4824	-0.556497			-1.21964	2.58901	-3.71818	0.300719
	7.9271	14.3739	14.6436	-0.56322			-1.21925	2.49516	-3.6541	0.243247
	7.84377	14.4686	14.7184	-0.591716			-1.23289	2.43989	-3.61039	0.210496
	7.72845	14.7254	14.6969	-0.605684			-1.31081	2.46018	-3.60418	0.19006
	7.59952	15.0661	14.7032	-0.604469			-1.33963	2.46715	-3.61395	0.202662
	7.51716	15.2436	14.7518	-0.631808			-1.324	2.47179	-3.62142	0.291704
	7.50241	15.341	14.7489	-0.668041			-1.35734	2.4714	-3.54203	0.406414
	7.52203	15.4453	14.689	-0.659998			-1.37774	2.36672	-3.40171	0.454322
	7.55603	15.3366	14.5711	-0.629799			-1.31165	2.20444	-3.35753	0.448261
	7.58727	15.0602	14.4304	-0.626967			-1.28539	2.17862	-3.46002	0.449504
	7.61767	14.9106	14.3899	-0.642743			-1.39304	2.28704	-3.56656	0.449315
	7.66638	14.867	14.5057	-0.678792			-1.5166	2.36879	-3.58045	0.430126
	7.75982	14.7825	14.6166	-0.743879			-1.59554	2.41313	-3.54149	0.396994
	7.85871	14.7976	14.5878	-0.784203			-1.65011	2.45721	-3.48094	0.32446
	7.90399	15.0228	14.4859	-0.757887			-1.61993	2.43866	-3.43751	0.209649
	7.88917	15.2133	14.4092	-0.725261			-1.46084	2.3544	-3.4614	0.131948
	7.85263	15.2908	14.3989	-0.733016			-1.35303	2.30973	-3.50126	0.125561
	7.83594	15.4428	14.4894	-0.733434			-1.37905	2.26914	-3.44938	0.107093
	7.86274	15.5345	14.6629	-0.730398			-1.39501	2.15105	-3.36732	0.0385669
	7.88727	15.4132	14.8024	-0.763597			-1.37071	2.07082	-3.40375	-0.00751987
	7.82764	15.3648	14.8665	-0.806059			-1.40147	2.10977	-3.54178	-0.00345171
	7.71985	15.4907	14.9314	-0.807938			-1.41926	2.16491	-3.69251	0.0257577
	7.6699	15.4703	14.9843	-0.811716			-1.34994	2.16838	-3.78868	0.0826575
	7.72911	15.3238	14.9608	-0.839111			-1.30215	2.1768	-3.80657	0.14484
	7.84985	15.2858	14.8966	-0.852305			-1.27805	2.15797	-3.7813	0.127834
	7.95065	15.2859	14.8628	-0.856694			-1.18782	2.11543	-3.84155	0.0601537
	8.00018	15.2203	14.8418	-0.890379			-1.13862	2.16845	-4.00105	0.0555433
	8.00709	15.2388	14.8438	-0.928796			-1.23443	2.34506	-4.09263	0.115567
	8.01767	15.3548	14.9095	-0.924488			-1.34139	2.47465	-4.01572	0.159738
	8.07131	15.4205	14.9527	-0.92489			-1.34061	2.46322	-3.87431	0.192963
	8.1684	15.5202	14.9039	-0.894107			-1.3195	2.37703	-3.81453	0.232199
	8.23054	15.7693	14.8504	-0.86681			-1.32379	2.24439	-3.83991	0.24602
	8.2003	15.9072	14.8892	-0.889333			-1.32194	2.09561	-3.8995	0.254656
	8.09101	15.755	14.9562	-0.978458			-1.35076	2.04251	-3.94134	0.294415
	7.94754	15.5876	14.9854	-1.0503			-1.42699	2.07463	-3.91707	0.298081
	7.83268	15.5485	14.9652	-1.0293			-1.4313	2.04618	-3.85624	0.22469
	7.79977	15.3982	14.9005	-0.985929			-1.33253	1.97792	-3.85891	0.164586
	7.82572	15.1483	14.8335	-0.98867			-1.30031	2.01111	-3.90405	0.166866
	7.8427	15.0109	14.8501	-1.02252			-1.34132	2.04026	-3.88026	0.17477
	7.83368	14.9255	14.9355	-1.099			-1.33791	2.1192	-3.81043	0.174422
	7.8026	14.852	14.9733	-1.21533			-1.32348	2.19314	-3.81728	0.182905
	7.74385	14.9723	14.9378	-1.28996			-1.38443	2.29641	-3.88754	0.159442
	7.67436	15.2376	14.9198	-1.28584			-1.45002	2.33608	-3.94301	0.11516
	7.61485	15.335	14.9592	-1.28172			-1.52697	2.32494	-3.93338	0.12853
	7.5596	15.3029	15.0145	-1.29814			-1.686	2.31883	-3.81135	0.165087
	7.49094	15.2808	15.0748	-1.2964			-1.79409	2.24054	-3.60422	0.122284
	7.43463	15.1672	15.1169	-1.29222			-1.71178	2.06688	-3.50292	0.0400031
	7.42257	14.9763	15.0905	-1.3407			-1.54647	1.92876	-3.59476	0.00578105
	7.44477	14.9686	15.047	-1.42428			-1.44505	1.89147	-3.75087	0.00429122
	7.47827	15.1298	15.062	-1.51224			-1.3774	1.87136	-3.83123	0.0163436
	7.51218	15.196	15.059	-1.59169			-1.31839	1.88003	-3.86569	0.0695952
	7.51911	15.1752	14.9184	-1.60227			-1.31107	1.94068	-3.88591	0.111135
	7.48546	15.1925	14.7201	-1.50048			-1.31201	1.95403	-3.88767	0.0878901
	7.47559	15.0947	14.6262	-1.37691			-1.27514	1.89643	-3.90712	0.060618
	7.51506	14.8729	14.6827	-1.32882			-1.27059	1.91257	-3.92352	0.0815685
	7.54021	14.7889	14.8532	-1.32781			-1.33231	1.99927	-3.85698	0.0864838
	7.49647	14.8816	15.0286	-1.33176			-1.34352	2.01438	-3.74058	0.0520323
	7.40594	14.9745	15.0655	-1.35774			-1.24772	1.9903	-3.72159	0.0282842
	7.2925	15.1395	14.952	-1.38708			-1.24324	2.02451	-3.80912	0.0207296
	7.20428	15.3935	14.9016	-1.4188			-1.31545	2.06597	-3.93518	0.01968
	7.18922	15.4264	15.0081	-1.49128			-1.35268	2.08989	-4.07465	0.0510165
	7.23284	15.1965	15.1364	-1.56227			-1.37231	2.17221	-4.15493	0.108539
	7.29089	14.9896	15.1596	-1.52826			-1.38162	2.25335	-4.09588	0.0919033
	7.34278	14.7863	15.101	-1.40976			-1.27907	2.21712	-3.96315	0.00678138
	7.37459	14.5185	15.005	-1.31083			-1.15192	2.15458	-3.89247	-0.100002
	7.36651	14.412	14.9428	-1.27063			-1.13992	2.15707	-3.86769	-0.134738
	7.33853	14.5572	15.0082	-1.29375			-1.16392	2.16408	-3.83205	-0.190669
	7.34669	14.7053	15.133	-1.39964			-1.10538	2.14414	-3.82508	-0.248817
	7.4039	14.733	15.1647	-1.57104			-1.03046	2.18276	-3.87675	-0.29177
	7.46864	14.7839	15.1228	-1.72694			-0.995562	2.24993	-3.94313	-0.34045
	7.50268	14.8012	15.1247	-1.83296			-0.950834	2.24893	-4.00059	-0.355983
	7.49719	14.6852	15.1534	-1.88863			-0.938007	2.24711	-4.05687	-0.298002
	7.43782	14.6229	15.1693	-1.88006			-1.02704	2.28169	-4.03553	-0.242245
	7.36586	14.7207	15.2226	-1.80707			-1.12255	2.27615	-3.94205	-0.242516
	7.34601	14.7597	15.2757	-1.72621			-1.12957	2.2357	-3.90354	-0.24511
	7.37346	14.7429	15.2716	-1.66531			-1.13634	2.24237	-3.96623	-0.213058
	7.40468	14.8618	15.2785	-1.60222			-1.18954	2.17939	-4.02137	-0.202162
	7.41497	14.9468	15.3531	-1.5552			-1.18912	1.96024	-4.02087	-0.229428
	7.40949	14.8182	15.3969	-1.54735			-1.16535	1.7632	-3.97471	-0.271145
	7.41282	14.7364	15.346	-1.53239			-1.19678	1.7394	-3.86265	-0.323488
	7.47477	14.8045	15.2551	-1.4906			-1.20166	1.81752	-3.74542	-0.360513
	7.565	14.8311	15.0986	-1.48406			-1.14275	1.95916	-3.71724	-0.320757
	7.61141	14.7512	14.8795	-1.52984			-1.14943	2.12377	-3.74231	-0.232976
	7.58514	14.7789	14.7287	-1.54239			-1.18931	2.20289	-3.71122	-0.201015
	7.51499	14.7375	14.7218	-1.47548			-1.13338	2.14954	-3.66553	-0.235986
	7.45287	14.5986	14.7696	-1.34702			-1.06481	2.08558	-3.70122	-0.267427
	7.42804	14.5655	14.8464	-1.2079			-1.08963	2.06159	-3.78435	-0.267036
	7.43956	14.6502	14.9764	-1.13026			-1.12978	2.00471	-3.84426	-0.251135
	7.47103	14.6587	15.0848	-1.18147			-1.12712	1.9417	-3.85894	-0.19833
	7.49187	14.6345	15.1076	-1.31236			-1.14841	1.96633	-3.81772	-0.151615
	7.4539	14.6945	15.1031	-1.39681			-1.16824	2.00319	-3.73909	-0.18242
	7.35396	14.6598	15.0918	-1.40905			-1.14357	1.98184	-3.74929	-0.263576
	7.24844	14.3878	15.0589	-1.40733			-1.14249	1.96787	-3.88551	-0.231661
	7.17947	14.1369	15.0833	-1.41127			-1.1892	1.96698	-4.00184	-0.126073
	7.1606	14.0651	15.2166	-1.40317			-1.13925	1.90059	-4.02511	-0.0238312
	7.16452	14.0414	15.3478	-1.46227			-0.94942	1.84081	-4.03796	0.0554835
	7.15281	14.1483	15.3837	-1.47019			-0.782459	1.90088	-4.08134	0.0809101
	7.1175	14.495	15.3787	-1.42042			-0.699721	1.98635	-4.10294	0.0153363
	7.10409	14.8122	15.3941	-1.35282			-0.656387	2.01233	-4.11224	-0.0697413
	7.15187	14.904	15.3987	-1.32944			-0.701565	2.03053	-4.07572	-0.110245
	7.23472	14.9864	15.3769	-1.32102			-0.862831	2.05091	-3.94444	-0.148119
	7.29684	15.0222	15.3296	-1.30915			-0.989331	2.00268	-3.8013	-0.202065
	7.32256	14.8406	15.2401	-1.33286			-1.05364	1.95605	-3.7835	-0.206451
	7.34616	14.6687	15.149	-1.37114			-1.16029	1.97704	-3.85715	-0.178397
	7.38124	14.6721	15.1422	-1.36911			-1.23095	1.98108	-3.89804	-0.196331
	7.42616	14.6467	15.1922	-1.35216			-1.18996	1.92484	-3.88578	-0.257074
	7.4521	14.5593	15.1639	-1.33865			-1.13542	1.90836	-3.83683	-0.328391
	7.40972	14.6241	15.0504	-1.28745			-1.12204	1.95628	-3.76393	-0.433184
	7.30094	14.7765	14.9464	-1.20755			-1.05815	1.99681	-3.72923	-0.531486
	7.21211	14.7817	14.9136	-1.18423			-0.967839	2.04493	-3.7849	-0.548674
	7.1713	14.7292	14.9711	-1.21588			-0.960663	2.13388	-3.84099	-0.52522
	7.14647	14.6974	15.1529	-1.25162			-0.991472	2.17271	-3.83016	-0.5264
	7.13928	14.5347	15.3839	-1.29219			-0.998113	2.17055	-3.85218	-0.505834
	7.14017	14.3285	15.5395	-1.34			-1.04744	2.23698	-3.95661	-0.437048
	7.1114	14.3723	15.607	-1.34553			-1.1805	2.30899	-4.06434	-0.409683
	7.07831	14.5783	15.6522	-1.31969			-1.28013	2.22839	-4.11688	-0.41673
	7.08243	14.6762	15.6717	-1.31678			-1.32866	2.07828	-4.13215	-0.412894
	7.10916	14.7901	15.6416	-1.30588			-1.3916	2.00004	-4.10699	-0.411199
	7.14338	14.9795	15.5947	-1.26562			-1.4018	2.00002	-4.0832	-0.418877
	7.19961	15.0124	15.5376	-1.23913			-1.3154	2.07641	-4.14688	-0.371632
	7.26068	14.9531	15.4502	-1.22255			-1.25876	2.23925	-4.24674	-0.280513
	7.30962	15.0252	15.4049	-1.15993			-1.2798	2.34941	-4.27618	-0.246739
	7.36351	15.0665	15.4536	-1.08381			-1.26401	2.26464	-4.23809	-0.282028
	7.43559	14.9864	15.5037	-1.04085			-1.27553	2.10898	-4.21741	-0.299377
	7.48168	14.8748	15.4586	-1.00029			-1.41935	2.00997	-4.1948	-0.293997
	7.46919	14.9985	15.3886	-0.948239			-1.56724	1.92031	-4.15718	-0.28249
	7.41629	15.0349	15.362	-0.926867			-1.60475	1.77687	-4.13339	-0.232938
	7.32861	14.9978	15.3515	-0.930098			-1.58157	1.6321	-4.11652	-0.163587
	7.22345	15.0745	15.3652	-0.922088			-1.52617	1.48169	-4.07234	-0.152778
	7.1633	15.1698	15.4012	-0.932263			-1.41992	1.35084	-4.0426	-0.171245
	7.17385	15.1384	15.3849	-0.981933			-1.37406	1.39147	-4.08507	-0.161288
	7.17813	15.1465	15.3215	-1.00331			-1.43723	1.60184	-4.13218	-0.166368
	7.15527	15.2004	15.3487	-0.948759			-1.47107	1.7582	-4.13361	-0.219221
	7.1263	15.0419	15.4573	-0.854386			-1.39389	1.76137	-4.14435	-0.265568
	7.06745	14.7584	15.537	-0.77096			-1.32628	1.69271	-4.19359	-0.291465
	6.97727	14.6439	15.5739	-0.703585			-1.3265	1.57148	-4.2481	-0.324938
	6.9146	14.6158	15.6071	-0.684505			-1.31746	1.44939	-4.31841	-0.334222
	6.91172	14.6182	15.5936	-0.718244			-1.34011	1.49154	-4.40284	-0.30206
	6.95465	14.8338	15.5512	-0.751722			-1.43582	1.67532	-4.41821	-0.316849
	7.03159	15.1443	15.5525	-0.761795			-1.49257	1.79291	-4.38161	-0.398528
	7.09603	15.2514	15.5685	-0.779339			-1.46296	1.79197	-4.38857	-0.454742
	7.11485	15.304	15.5668	-0.787584			-1.4454	1.77512	-4.42583	-0.443381
	7.139	15.5044	15.6338	-0.751585			-1.39137	1.72387	-4.40007	-0.400512
	7.19905	15.6777	15.7633	-0.710539			-1.22752	1.63206	-4.30944	-0.32907
	7.24206	15.7023	15.8128	-0.691913			-1.0823	1.60388	-4.20064	-0.248877
	7.19548	15.6798	15.7642	-0.652218			-1.04273	1.64588	-4.06704	-0.228278
	7.08671	15.601	15.7284	-0.566825			-1.0169	1.66118	-3.9573	-0.253555
	6.98513	15.4146	15.7036	-0.488386			-0.993831	1.66111	-3.94184	-0.253982
	6.90662	15.3677	15.6721	-0.451899			-1.05171	1.69078	-3.97736	-0.260378
	6.82025	15.5888	15.6895	-0.455139			-1.13141	1.63626	-3.94408	-0.332886
	6.70847	15.7737	15.7413	-0.509642			-1.15258	1.48842	-3.88788	-0.398702
	6.58972	15.6975	15.7299	-0.596131			-1.18612	1.41246	-3.90254	-0.372771
	6.50677	15.6187	15.6879	-0.638182			-1.27133	1.43946	-3.96513	-0.277408
	6.51465	15.6127	15.6974	-0.612877			-1.31847	1.42901	-4.03559	-0.166263
	6.59009	15.4785	15.7184	-0.579609			-1.30977	1.37783	-4.11324	-0.0736139
	6.65451	15.3707	15.7141	-0.560906			-1.35663	1.35789	-4.14011	-0.0657661
	6.66811	15.4675	15.7271	-0.528514			-1.42354	1.34144	-4.09397	-0.145673
	6.65209	15.5108	15.7576	-0.508667			-1.4339	1.34873	-4.10027	-0.201802
	6.62196	15.4202	15.7321	-0.513818			-1.44737	1.45303	-4.18699	-0.175908
	6.57678	15.4165	15.6715	-0.515228			-1.4804	1.57565	-4.2368	-0.151322
	6.50905	15.4242	15.6061	-0.520236			-1.41528	1.60577	-4.23177	-0.176759
	6.42336	15.2592	15.5154	-0.580243			-1.30431	1.61882	-4.24697	-0.218438
	6.35668	15.1368	15.4329	-0.653223			-1.3132	1.66157	-4.27629	-0.271673
	6.35898	15.1392	15.474	-0.666583			-1.38088	1.61067	-4.28817	-0.332649
	6.44953	14.9959	15.6149	-0.622023			-1.41829	1.46327	-4.32238	-0.329561
	6.58977	14.7434	15.7151	-0.564962			-1.47119	1.35661	-4.31998	-0.255346
	6.69022	14.6857	15.7533	-0.523631			-1.53396	1.30817	-4.19764	-0.188711
	6.69734	14.7629	15.7812	-0.529849			-1.50981	1.24974	-4.0522	-0.150248
	6.63608	14.7464	15.7959	-0.591525			-1.44312	1.25043	-4.04146	-0.0954645
	6.55595	14.7275	15.8384	-0.620184			-1.42535	1.32479	-4.1352	-0.0645139
	6.4958	14.7739	15.9722	-0.547908			-1.40162	1.32043	-4.21672	-0.102617
	6.49501	14.7248	16.1277	-0.430352			-1.34022	1.21165	-4.27184	-0.164488
	6.52035	14.6813	16.1649	-0.356726			-1.34368	1.10655	-4.26456	-0.209504
	6.51384	14.9206	16.1112	-0.338733			-1.43235	1.01433	-4.18887	-0.232487
	6.48218	15.2565	16.0127	-0.370174			-1.47529	0.923525	-4.13455	-0.194815
	6.46299	15.372	15.9075	-0.432594			-1.47253	0.946826	-4.15215	-0.0833935
	6.45414	15.4189	15.7514	-0.457305			-1.52639	1.07498	-4.13829	0.000320749
	6.44806	15.4151	15.641	-0.428693			-1.56222	1.17094	-4.07142	-0.00927343
	6.45081	15.135	15.6311	-0.417289			-1.53478	1.22442	-4.0541	-0.0585871
	6.44396	14.8128	15.7225	-0.427415			-1.54518	1.3293	-4.10721	-0.109031
	6.43992	14.7333	15.9043	-0.403001			-1.58427	1.43352	-4.17617	-0.186363
	6.47369	14.7572	16.0671	-0.365136			-1.52466	1.44925	-4.22571	-0.253773
	6.55761	14.7633	16.0544	-0.365119			-1.46801	1.42697	-4.21788	-0.251796
	6.63918	14.9483	15.8689	-0.361888			-1.52894	1.38201	-4.10878	-0.198738
	6.68251	15.2399	15.704	-0.319393			-1.58859	1.27321	-3.98123	-0.12392
	6.68855	15.26	15.6352	-0.252279			-1.59113	1.18756	-3.96117	-0.0154039
	6.63961	15.2891	15.6273	-0.17988			-1.6212	1.20884	-4.00952	0.0759563
	6.51811	15.4027	15.6678	-0.13786			-1.65434	1.23122	-4.01691	0.0586387
	6.35714	15.4212	15.7463	-0.109819			-1.61706	1.16444	-3.98722	-0.0163895
	6.19775	15.2732	15.8226	-0.150041			-1.58658	1.12285	-4.00706	-0.037172
	6.06473	15.1636	15.9278	-0.173424			-1.59484	1.12834	-4.07899	-0.0237468
	6.0079	15.0781	16.0834	-0.133454			-1.55417	1.06632	-4.1709	-0.0233543
	6.03941	14.8796	16.1778	-0.0964101			-1.47989	0.948874	-4.22412	-0.0248591
	6.08162	14.7694	16.1243	-0.101178			-1.50985	0.893711	-4.14304	-0.0415757
	6.09202	14.8759	16.0239	-0.113733			-1.62434	0.914098	-3.94347	-0.103562
	6.07393	14.8691	15.981	-0.138879			-1.70355	1.00415	-3.80203	-0.146067
	6.02278	14.656	15.9944	-0.161006			-1.76872	1.1941	-3.83215	-0.122159
	5.82968	14.5395	16.0334	-0.114517			-1.84399	1.36705	-3.91931	-0.111283
	5.8458	14.5953	16.0924	-0.0133504			-1.84394	1.38708	-3.96533	-0.155564
	5.90857	14.716	16.1048	0.0399681			-1.81014	1.33289	-3.97554	-0.192604
	5.98871	14.9562	16.0777	0.0268513			-1.86335	1.35229	-3.98985	-0.205808
	6.05723	15.2732	16.0908	-0.00278978			-1.90725	1.40401	-4.04758	-0.228628
	6.08777	15.4312	16.1353	-0.0556398			-1.80082	1.43293	-4.2031	-0.231433
	6.0743	15.4362	16.1084	-0.120577			-1.64157	1.47552	-4.40286	-0.211251
	6.02165	15.555	16.0236	-0.135936			-1.51505	1.49447	-4.49917	-0.23388
	5.96487	15.7281	15.9739	-0.102085			-1.41368	1.40384	-4.46531	-0.282347
	5.92062	15.7261	15.9518	-0.0739476			-1.40015	1.29427	-4.39763	-0.273096
	5.87293	15.6763	15.963	-0.0583511			-1.52345	1.29058	-4.34388	-0.247957
	5.81551	15.7511	16.0661	-0.0308554			-1.63347	1.28451	-4.26868	-0.286246
	5.78007	15.7474	16.2274	-0.0331077			-1.62999	1.19382	-4.18411	-0.341762
	5.76934	15.6207	16.3119	-0.0628831			-1.604	1.07789	-4.1095	-0.356776
	5.76716	15.5683	16.3059	-0.0674685			-1.61817	0.953543	-4.03789	-0.361763
	5.79304	15.5053	16.2673	-0.0438855			-1.61922	0.836894	-4.0579	-0.344803
	5.8524	15.2857	16.1988	-0.0484934			-1.6182	0.866671	-4.23202	-0.27846
	5.90778	15.1758	16.1174	-0.0744612			-1.68952	1.06812	-4.42034	-0.227147
	5.93875	15.2987	16.1113	-0.0984353			-1.75958	1.22995	-4.4363	-0.239342
	5.94475	15.3769	16.1734	-0.146474			-1.77017	1.27426	-4.3158	-0.235747
	5.92197	15.3239	16.2634	-0.194696			-1.80056	1.30329	-4.17408	-0.181186
	5.87687	15.2874	16.362	-0.169348			-1.85013	1.30239	-4.08545	-0.138777
	5.8413	15.1867	16.4713	-0.0744617			-1.80465	1.1842	-4.1186	-0.129807
	5.8226	14.9888	16.5092	0.0184762			-1.7269	1.02985	-4.2312	-0.125139
	5.80862	14.9627	16.4631	0.0876835			-1.75445	0.940434	-4.26152	-0.140542
	5.79215	15.1431	16.4061	0.112016			-1.80854	0.901851	-4.16783	-0.154077
	5.79864	15.2519	16.3395	0.0602394			-1.8068	0.97364	-4.12968	-0.104994
	5.82953	15.2228	16.2043	-0.0217771			-1.79449	1.19709	-4.21287	-0.0394018
	5.85092	15.1835	16.0843	-0.0598132			-1.75724	1.39634	-4.30007	-0.0551876
	5.85292	15.2675	16.0537	-0.0644088			-1.66548	1.37044	-4.3079	-0.115204
	5.82556	15.1847	16.0644	-0.0792005			-1.61939	1.22503	-4.26874	-0.114265
	5.73155	15.1593	16.0822	-0.0735006			-1.68663	1.11826	-4.21754	-0.0598503
	5.58208	15.1392	16.146	-0.00745434			-1.73432	1.0473	-4.22137	0.000107872
	5.45284	15.0088	16.1757	0.0929634			-1.70284	1.02916	-4.34177	0.0464601
	5.37219	14.9449	16.1112	0.200012			-1.69486	1.08057	-4.46406	0.0295383
	5.34585	15.1445	16.0572	0.290881			-1.77249	1.06469	-4.45044	-0.0858221
	5.36893	15.3246	16.1246	0.318211			-1.85548	0.930197	-4.36624	-0.196506
	5.39869	15.2432	16.2557	0.276862			-1.92505	0.832972	-4.34394	-0.246893
	5.40341	15.2332	16.3532	0.261033			-1.9821	0.811202	-4.33913	-0.276336
	5.42078	15.4708	16.4077	0.298059			-1.92227	0.748041	-4.21787	-0.305707
	5.47243	15.7818	16.3956	0.32643			-1.77289	0.684691	-3.92914	-0.281768
	5.51785	16.1269	16.3437	0.318347			-1.7251	0.716659	-3.52424	-0.216464
	5.31595	16.4182	16.4403	0.306799			-1.78222	0.779309	-3.32755	-0.168209
	5.36887	16.2686	16.6167	0.299133			-1.77501	0.797882	-3.62942	-0.132528
	5.50601	15.7555	16.6737	0.318443			-1.71725	0.852192	-4.16841	-0.0778959
	5.63756	15.3816	16.6047	0.399652			-1.67284	0.922497	-4.5376	-0.039449
	5.70101	15.1883	16.5883	0.500194			-1.59066	0.908568	-4.6655	-0.0298518
	5.71185	14.9566	16.6832	0.543987			-1.53673	0.901055	-4.72206	-0.0304131
	5.69465	14.8054	16.8264	0.53103			-1.62528	1.03182	-4.79984	-0.0772396
	5.68531	14.9275	16.9749	0.518674			-1.75052	1.19861	-4.87611	-0.211879
	5.68745	15.173	17.0109	0.50702			-1.77226	1.26794	-4.90582	-0.35438
	5.65746	15.3747	16.888	0.476957			-1.76581	1.27938	-4.85097	-0.40675
	5.56763	15.5612	16.7651	0.457078			-1.82328	1.23695	-4.67604	-0.387486
	5.47647	15.568	16.8102	0.457722			-1.89642	1.15683	-4.51455	-0.328267
	5.43702	15.2695	16.9324	0.445084			-1.9626	1.18394	-4.5314	-0.22266
	5.44759	15.046	17.0233	0.42562			-2.02763	1.34602	-4.67852	-0.119196
	5.51624	15.1361	17.0862	0.438072			-2.01562	1.43274	-4.8034	-0.0709845
	5.61276	15.3144	17.0997	0.46286			-1.8889	1.37786	-4.87439	-0.0386314
	5.66893	15.4583	17.0263	0.486225			-1.80994	1.33883	-4.91511	-0.00906963
	5.63334	15.6533	16.9422	0.556706			-1.83232	1.36717	-4.91224	-0.0549634
	5.52207	15.6773	16.8975	0.673442			-1.80733	1.3916	-4.91238	-0.165335
	5.38386	15.3838	16.7942	0.777933			-1.70108	1.40466	-4.95401	-0.227837
	5.26808	15.1009	16.6338	0.852031			-1.63224	1.38962	-4.97301	-0.215641
	5.19593	15.0015	16.5612	0.922453			-1.58443	1.28656	-4.93984	-0.174149
	5.16435	14.8937	16.6273	0.962219			-1.53686	1.17967	-4.92396	-0.107684
	5.17775	14.8098	16.7466	0.978013			-1.58836	1.23451	-4.94693	-0.0300738
	5.23637	14.9601	16.864	1.0157			-1.68817	1.3811	-4.92258	-0.00595296
	5.33423	15.2862	16.9233	1.05293			-1.69731	1.45363	-4.84202	-0.0113026
	5.44477	15.5092	16.8764	1.01923			-1.67556	1.47942	-4.7558	0.0233339
	5.50389	15.5685	16.8081	0.9454			-1.74537	1.54012	-4.70151	0.0622309
	5.48211	15.4699	16.8447	0.92294			-1.83395	1.5501	-4.72483	0.0431184
	5.41341	15.1478	16.9535	0.961276			-1.87052	1.49305	-4.89152	0.0082678
	5.33785	14.8467	17.057	1.03041			-1.90354	1.44847	-5.13268	-0.0121797
	5.25819	14.8119	17.1683	1.10999			-1.92291	1.36719	-5.2845	-0.0511776
	5.19169	14.8682	17.2889	1.14142			-1.87665	1.21901	-5.34021	-0.0742293
	5.14158	14.7747	17.2989	1.08226			-1.82495	1.12487	-5.38263	-0.0408535
	5.09466	14.7479	17.1632	0.999785			-1.8438	1.14121	-5.41038	-0.0335883
	5.05213	14.9135	16.9656	0.952998			-1.83017	1.15636	-5.37969	-0.0848276
	5.04099	15.0831	16.7879	0.89299			-1.7245	1.16458	-5.3115	-0.0943047
	5.07995	15.2331	16.6653	0.807691			-1.66059	1.2352	-5.17113	-0.0416856
	5.14953	15.37	16.6719	0.764873			-1.68739	1.33193	-4.94971	-0.0139032
	5.2163	15.2297	16.7722	0.775845			-1.7199	1.3883	-4.78771	-0.0274795
	5.2392	14.8418	16.8083	0.816652			-1.7524	1.4529	-4.79208	-0.0518154
	5.19053	14.6297	16.7102	0.920417			-1.79845	1.49109	-4.86999	-0.103631
	5.11047	14.691	16.6273	1.08208			-1.72532	1.35568	-4.90918	-0.171526
	5.02577	14.7477	16.6217	1.21594			-1.56065	1.10546	-4.93192	-0.17906
	5.09589	14.7423	16.6797	1.30818			-1.47581	0.949748	-4.97208	-0.16579
	5.10546	14.7805	16.797	1.38158			-1.47391	0.932891	-5.0544	-0.202943
	5.06613	14.8034	16.916	1.396			-1.45957	0.999576	-5.20503	-0.242336
	5.03433	14.7932	16.9498	1.32145			-1.48209	1.16478	-5.34836	-0.210319
	5.02548	14.9368	16.94	1.24354			-1.57242	1.3749	-5.36214	-0.127407
	5.06397	15.1201	17.0019	1.21265			-1.61318	1.50225	-5.26127	-0.0303109
	5.15804	15.0453	17.0775	1.19878			-1.5711	1.60234	-5.19779	0.0795174
	5.23512	14.8695	17.0295	1.19508			-1.51074	1.71481	-5.18344	0.145455
	5.24861	14.8339	16.8787	1.20987			-1.43137	1.68175	-5.13643	0.132146
	5.2269	14.7709	16.7262	1.20482			-1.32378	1.45058	-5.0462	0.104366
	5.16929	14.6615	16.6289	1.18465			-1.31333	1.22114	-4.97413	0.103419
	5.06348	14.7226	16.6154	1.22296			-1.4564	1.10395	-4.9469	0.0640682
	4.94645	14.8396	16.7029	1.308			-1.57703	1.07065	-5.00584	-0.00659855
	4.87257	14.8043	16.7993	1.37179			-1.58232	1.15373	-5.17543	-0.0234978
	4.84218	14.747	16.8465	1.42017			-1.55098	1.33367	-5.33124	0.0309397
	4.86203	14.7869	16.9691	1.48318			-1.49194	1.45094	-5.38741	0.083028
	4.92472	14.7637	17.1847	1.52783			-1.39352	1.44125	-5.41743	0.129992
	4.98191	14.6802	17.3468	1.53011			-1.37695	1.46249	-5.50115	0.175265
	4.99808	14.7119	17.3617	1.49929			-1.45783	1.55301	-5.57639	0.182133
	5.01078	14.7552	17.3161	1.39455			-1.47047	1.59318	-5.58007	0.181506
	5.04988	14.6297	17.2335	1.21296			-1.42399	1.56219	-5.51183	0.24369
	5.06379	14.5474	17.1761	1.06949			-1.42504	1.50845	-5.37913	0.331855
	5.03419	14.6817	17.2219	1.06576			-1.43371	1.4037	-5.25393	0.364521
	4.9688	14.828	17.2849	1.16201			-1.38479	1.31512	-5.25883	0.348084
	4.86217	14.8762	17.2373	1.24976			-1.34892	1.36836	-5.37543	0.317629
	4.74242	14.9917	17.1532	1.29208			-1.32343	1.4513	-5.41651	0.265928
	4.67895	15.0679	17.1702	1.29821			-1.24849	1.39349	-5.30765	0.229563
	4.65811	14.8653	17.2418	1.30926			-1.19359	1.29963	-5.14856	0.247292
	4.62278	14.6844	17.282	1.36837			-1.25924	1.30726	-5.01138	0.253
	4.58714	14.5232	17.2827	1.45578			-1.3643	1.35849	-4.95144	0.205015
	4.57218	14.3617	17.2212	1.4705			-1.40964	1.38204	-5.01255	0.185505
	4.59014	14.2687	17.1114	1.39935			-1.47591	1.38907	-5.12113	0.246506
	4.67428	14.4119	17.0868	1.34166			-1.58829	1.33279	-5.13452	0.316887
	4.80863	14.5588	17.188	1.34343			-1.6356	1.26539	-5.10096	0.357172
	4.91518	14.4799	17.2628	1.35767			-1.62023	1.38438	-5.13141	0.377773
	4.91562	14.3803	17.2341	1.35199			-1.61502	1.72994	-5.18911	0.370198
	4.81092	14.4031	17.2041	1.32357			-1.55502	2.06125	-5.19999	0.352407
	4.66937	14.3877	17.2103	1.25841			-1.42872	2.22424	-5.17662	0.391619
	4.59207	14.365	17.2307	1.19333			-1.37004	2.27897	-5.12005	0.449008
	4.62169	14.5074	17.2675	1.19026			-1.35379	2.23707	-5.00703	0.417535
	4.73055	14.665	17.2588	1.21542			-1.27198	2.10529	-4.92163	0.284383
	4.81131	14.5961	17.0877	1.1912			-1.21095	2.00476	-4.91699	0.223637
	4.89651	14.4627	16.8604	1.12941			-1.27525	1.97192	-4.93069	0.249641
	4.89974	14.3862	16.7659	1.09395			-1.38033	1.91051	-4.93794	0.308601
	4.88264	14.2228	16.8295	1.0865			-1.46006	1.90475	-5.01457	0.368666
	4.87373	14.0499	16.9377	1.10066			-1.55226	2.06162	-5.12871	0.387918
	4.86686	14.0387	17.0451	1.15251			-1.59823	2.22406	-5.16116	0.331573
	4.87123	14.0234	17.1404	1.21094			-1.54309	2.22101	-5.11078	0.280415
	4.88135	13.8855	17.2199	1.24355			-1.47527	2.13923	-5.01677	0.310607
	4.88692	13.8257	17.3308	1.29196			-1.495	2.08542	-4.87321	0.357006
	4.89282	13.8123	17.4769	1.38445			-1.50315	2.06208	-4.75092	0.352261
	4.90623	13.612	17.5199	1.45085			-1.4391	2.11397	-4.75113	0.339084
	4.91855	13.4065	17.3572	1.47054			-1.38421	2.21184	-4.78907	0.324071
	4.92266	13.4438	17.1152	1.48363			-1.33633	2.17492	-4.72912	0.285457
	4.9364	13.5947	16.9476	1.48947			-1.24272	1.9971	-4.63061	0.266437
	4.98689	13.7203	16.8609	1.45601			-1.20793	1.89895	-4.58639	0.281334
	5.05167	13.9445	16.8278	1.40849			-1.30439	1.97665	-4.60572	0.248812
	5.08167	14.2023	16.8406	1.34537			-1.39653	2.07808	-4.67608	0.154627
	5.06736	14.3174	16.8504	1.24692			-1.45361	2.12921	-4.77963	0.0977291
	5.01627	14.4623	16.8597	1.19287			-1.56879	2.13715	-4.8315	0.0897293
	4.93891	14.7423	16.9308	1.2662			-1.65998	2.07258	-4.85331	0.070007
	4.86735	14.7647	17.0583	1.39732			-1.6071	2.00682	-4.97117	0.0418606
	4.78178	14.3899	17.1041	1.46877			-1.47939	2.08637	-5.17304	0.0406185
	4.65213	14.0074	17.0654	1.47799			-1.36678	2.20484	-5.30112	0.0427037
	4.52983	13.6924	17.0223	1.47156			-1.24322	2.12997	-5.27588	0.0568265
	4.5047	13.3455	17.0064	1.47206			-1.17096	1.92009	-5.18683	0.104962
	4.56175	13.1826	16.9766	1.50664			-1.23195	1.73902	-5.10455	0.100492
	4.64112	13.2839	16.9368	1.55825			-1.32243	1.62079	-5.06618	-0.0190555
	4.69846	13.4006	16.8479	1.54305			-1.327	1.57866	-5.0898	-0.129758
	4.70744	13.4655	16.72	1.44222			-1.3117	1.65098	-5.1267	-0.11634
	4.68644	13.7133	16.6703	1.35272			-1.33304	1.72147	-5.11122	-0.0469421
	4.68506	13.9424	16.7768	1.32689			-1.2911	1.70557	-5.08988	-0.0232935
	4.721	14.0062	16.8865	1.34093			-1.22146	1.73704	-5.13858	-0.0685755
	4.73843	14.0862	16.8505	1.39009			-1.21832	1.88811	-5.2071	-0.182054
	4.69425	14.2132	16.7502	1.44151			-1.22108	1.98989	-5.24325	-0.2885
	4.60112	14.1064	16.6882	1.4289			-1.14745	1.91315	-5.28132	-0.252443
	4.49475	13.8153	16.659	1.37004			-1.10789	1.72837	-5.33408	-0.0789063
	4.40007	13.6346	16.6508	1.36258			-1.12321	1.50235	-5.364	0.0582487
	4.3493	13.5157	16.6149	1.39042			-1.09316	1.27746	-5.37528	0.0800838
	4.33789	13.3794	16.4618	1.37076			-1.08363	1.19879	-5.3978	0.0525596
	4.30227	13.3966	16.2563	1.29393			-1.17181	1.26257	-5.38139	0.0024191
	4.25038	13.5413	16.1281	1.215			-1.23328	1.27452	-5.31791	-0.0761154
	4.24305	13.4813	16.1979	1.16694			-1.19092	1.18595	-5.28944	-0.199256
	4.27219	13.2696	16.2841	1.18378			-1.14341	1.15817	-5.35848	-0.299685
	4.30623	13.2251	16.3166	1.26043			-1.1152	1.1952	-5.47055	-0.453145
	4.31554	13.286	16.3072	1.29628			-1.05435	1.20463	-5.57787	-0.556571
	4.31098	13.2812	16.2497	1.23072			-1.03256	1.20714	-5.64556	-0.498322
	4.29607	13.3162	16.1707	1.14169			-1.11024	1.20666	-5.59373	-0.376669
	4.32151	13.3657	16.1347	1.10922			-1.18881	1.1575	-5.44765	-0.34893
	4.39128	13.247	16.0736	1.10526			-1.18644	1.13782	-5.35129	-0.407786
	4.45403	13.1295	15.9466	1.10574			-1.16897	1.24098	-5.35488	-0.478656
	4.47051	13.1941	15.8783	1.14574			-1.13765	1.33002	-5.35744	-0.512908
	4.44513	13.2815	15.9826	1.21679			-1.04169	1.28097	-5.33362	-0.47079
	4.41063	13.3175	16.1303	1.27679			-0.978996	1.19119	-5.31717	-0.394924
	4.38861	13.4337	16.1807	1.29553			-1.0167	1.15952	-5.30539	-0.41265
	4.3878	13.6498	16.0979	1.23866			-1.02586	1.12746	-5.32954	-0.52204
	4.37927	13.6469	15.898	1.07179			-0.958619	1.08614	-5.43521	-0.577368
	4.31698	13.5244	15.6956	0.890072			-0.952642	1.07076	-5.5403	-0.526382
	4.20742	13.5216	15.7088	0.825393			-0.997527	0.98909	-5.52631	-0.454801
	4.14965	13.5194	15.9421	0.872645			-1.02472	0.826677	-5.4565	-0.413384
	4.19304	13.4325	16.1643	0.952262			-1.08797	0.782113	-5.44477	-0.415527
	4.27642	13.5174	16.2496	1.01864			-1.20852	0.900402	-5.45881	-0.465967
	4.34382	13.7603	16.2536	1.04348			-1.26085	0.994165	-5.42896	-0.488227
	4.3786	13.729	16.2634	0.988084			-1.22699	1.01729	-5.3649	-0.396384
	4.35474	13.4522	16.2533	0.909202			-1.19796	1.06116	-5.27717	-0.274267
	4.26726	13.219	16.224	0.884281			-1.147	1.09869	-5.16819	-0.264355
	4.14114	13.0098	16.1376	0.887293			-1.0313	1.13648	-5.14199	-0.340641
	3.99541	12.8278	15.9801	0.84573			-0.945593	1.23716	-5.20218	-0.390217
	3.86934	12.8304	15.8834	0.783787			-0.964206	1.29422	-5.21151	-0.385714
	3.82354	12.8725	15.9259	0.750224			-1.00071	1.14398	-5.13173	-0.344513
	3.85284	12.7225	15.9555	0.760259			-1.02551	0.919698	-5.07826	-0.282818
	3.89969	12.5184	15.8319	0.820548			-1.12028	0.79207	-5.07276	-0.27048
	3.91754	12.5149	15.6669	0.902345			-1.2175	0.715536	-5.07898	-0.318786
	3.90993	12.4932	15.6204	0.925868			-1.21998	0.63863	-5.14187	-0.334328
	3.89186	12.4107	15.6697	0.873667			-1.20754	0.606361	-5.23755	-0.282556
	3.87222	12.4727	15.7587	0.820498			-1.24506	0.599272	-5.28373	-0.259337
	3.85692	12.626	15.8048	0.796634			-1.22054	0.561427	-5.29988	-0.306984
	3.857	12.6768	15.713	0.760515			-1.13586	0.590668	-5.3522	-0.365209
	3.85041	12.724	15.5264	0.723029			-1.1005	0.695503	-5.36792	-0.402145
	3.83734	12.8159	15.4716	0.739221			-1.0667	0.688035	-5.29917	-0.422035
	3.85608	12.7153	15.5868	0.825952			-0.988347	0.538483	-5.25611	-0.417156
	3.90439	12.4734	15.7267	0.960269			-0.957378	0.458418	-5.30926	-0.433852
	3.96899	12.412	15.8025	1.10006			-0.993871	0.511831	-5.40848	-0.533709
	4.05857	12.4918	15.8093	1.15481			-0.973923	0.611093	-5.49919	-0.653846
	4.14159	12.506	15.7415	1.07034			-0.933302	0.753473	-5.55027	-0.664197
	4.14474	12.5844	15.6769	0.94227			-0.964689	0.912138	-5.50529	-0.58508
	4.08167	12.7306	15.7056	0.870583			-1.00121	0.987685	-5.4214	-0.53232
	4.03028	12.6386	15.7529	0.828068			-0.976618	1.01278	-5.45112	-0.538478
	4.02975	12.3658	15.7159	0.755968			-0.983229	1.06543	-5.57213	-0.573022
	4.06197	12.2134	15.6755	0.681192			-1.04244	1.04848	-5.63562	-0.621117
	4.07276	12.1104	15.7318	0.634376			-1.03091	0.877466	-5.59838	-0.633321
	4.02601	11.9616	15.8255	0.645905			-0.969294	0.692414	-5.54481	-0.585451
	3.95174	11.9322	15.8585	0.758356			-0.960546	0.589143	-5.50793	-0.576554
	3.91446	12.0356	15.8368	0.931843			-0.944198	0.550709	-5.5313	-0.663197
	3.92403	12.065	15.7415	1.02359			-0.895152	0.595665	-5.61871	-0.740032
	3.91796	12.071	15.5871	0.975684			-0.934724	0.747098	-5.65084	-0.71976
	3.8603	12.2153	15.4991	0.892361			-1.0359	0.838162	-5.53528	-0.666371
	3.77696	12.3678	15.4893	0.844947			-1.05206	0.728757	-5.38051	-0.648621
	3.70871	12.4211	15.4212	0.823439			-1.05846	0.565279	-5.3263	-0.679795
	3.63568	12.5507	15.2688	0.829294			-1.1593	0.498967	-5.35169	-0.772727
	3.56331	12.6977	15.1635	0.847303			-1.26548	0.486597	-5.38965	-0.8695
	3.50934	12.5049	15.1453	0.8265			-1.32128	0.490987	-5.41172	-0.852871
	3.48207	12.0818	15.2103	0.786345			-1.39071	0.53121	-5.38824	-0.747043
	3.49924	11.7549	15.3269	0.806524			-1.43405	0.535436	-5.30576	-0.694827
	3.55688	11.5097	15.3887	0.861106			-1.39299	0.523224	-5.23566	-0.714406
	3.59451	11.3711	15.3027	0.878172			-1.38128	0.628226	-5.22171	-0.713434
	3.53374	11.4921	15.2007	0.852474			-1.4402	0.797331	-5.20125	-0.68997
	3.36498	11.7325	15.2337	0.789474			-1.43934	0.820861	-5.16625	-0.672392
	3.13828	11.7965	15.3555	0.664381			-1.33851	0.695063	-5.1821	-0.638705
	2.93755	11.7388	15.3938	0.521681			-1.27152	0.573759	-5.2518	-0.620711
	2.83622	11.7046	15.2796	0.453338			-1.25242	0.508988	-5.31662	-0.671234
	2.8592	11.594	15.0887	0.467426			-1.22264	0.500955	-5.36393	-0.70292
	2.99555	11.4511	14.9446	0.5479			-1.24261	0.567122	-5.37241	-0.6423
	3.18824	11.5022	14.9227	0.702552			-1.33206	0.61825	-5.27945	-0.572602
	3.36174	11.7222	15.0068	0.881839			-1.36286	0.558172	-5.14277	-0.552852
	3.46528	11.8521	14.962	0.970656			-1.32971	0.495086	-5.07629	-0.533364
	3.46095	11.9177	14.733	0.966965			-1.40925	0.565015	-5.07506	-0.504547
	3.34404	11.9908	14.529	0.966229			-1.3889	0.638512	-5.04824	-0.489117
	3.19406	11.9503	14.5271	0.992488			-1.29818	0.598775	-5.01729	-0.452039
	3.09233	11.8121	14.6738	1.01437			-1.24804	0.526546	-5.02116	-0.414989
	3.04107	11.8347	14.835	1.02282			-1.28422	0.480077	-5.04755	-0.477346
	3.03732	11.9702	14.9099	0.988903			-1.31435	0.427776	-5.10556	-0.622673
	3.05584	11.9664	14.8664	0.894422			-1.33943	0.460663	-5.20164	-0.732008
	3.04062	11.9324	14.7948	0.833802			-1.4248	0.618584	-5.2392	-0.790087
	2.96223	11.954	14.7905	0.880955			-1.48568	0.749761	-5.13917	-0.839408
	2.85435	11.8287	14.8057	0.959329			-1.48038	0.795583	-5.00955	-0.855589
	2.73722	11.6061	14.7116	0.989474			-1.51051	0.830537	-4.95444	-0.833518
	2.48327	11.5471	14.6087	0.997618			-1.6094	0.826492	-4.93722	-0.824943
	2.495	11.564	14.6125	1.01927			-1.66449	0.697959	-4.91698	-0.806376
	2.54952	11.4805	14.718	1.04965			-1.65592	0.548336	-4.92105	-0.738267
	2.6365	11.4273	14.789	1.10759			-1.66928	0.492184	-4.94392	-0.701744
	2.74125	11.4688	14.8108	1.16417			-1.66124	0.503015	-4.99529	-0.760918
	2.85715	11.4686	14.8049	1.14178			-1.59986	0.567449	-5.12506	-0.835153
	2.95173	11.4864	14.7793	1.07078			-1.5793	0.711504	-5.24826	-0.855161
	2.99353	11.6777	14.8053	1.06725			-1.61576	0.830485	-5.22337	-0.835115
	3.00214	11.8741	14.9072	1.14758			-1.57927	0.820232	-5.08004	-0.786478
	2.99953	11.8604	14.9386	1.21002			-1.51897	0.822282	-4.96037	-0.721864
	2.94769	11.8418	14.8241	1.19836			-1.56324	0.956959	-4.90096	-0.704335
	2.85275	11.9563	14.6788	1.10601			-1.6381	1.07126	-4.86602	-0.718374
	2.78048	11.9086	14.5841	0.959371			-1.65219	1.06218	-4.85648	-0.676831
	2.75393	11.8215	14.5197	0.841013			-1.64886	0.995498	-4.82907	-0.596607
	2.7884	11.8205	14.4976	0.783692			-1.62208	0.885973	-4.77415	-0.580837
	2.91316	11.8334	14.4794	0.799184			-1.51574	0.762353	-4.7718	-0.629052
	3.07846	11.8192	14.394	0.769764			-1.43376	0.794046	-4.87811	-0.650504
	3.19002	11.9921	14.2802	0.731767			-1.4865	0.926868	-4.96419	-0.617964
	3.21968	12.2139	14.2661	0.744325			-1.55879	0.927556	-4.94256	-0.547605
	3.17377	12.0692	14.3331	0.791821			-1.57337	0.798344	-4.90548	-0.448982
	3.05201	11.6937	14.3686	0.846143			-1.60045	0.73729	-4.93673	-0.381514
	2.91947	11.448	14.3637	0.905067			-1.64067	0.795587	-5.01153	-0.41012
	2.83503	11.3129	14.3469	0.944632			-1.60922	0.914953	-5.0811	-0.470583
	2.80604	11.2333	14.306	0.966874			-1.57084	1.09024	-5.08614	-0.470452
	2.80444	11.3327	14.2689	1.01886			-1.58806	1.23294	-4.93726	-0.444717
	2.81757	11.5186	14.3134	1.08049			-1.55073	1.23321	-4.71843	-0.443337
	2.82918	11.5504	14.3375	1.07273			-1.43963	1.1913	-4.61885	-0.477013
	2.82831	11.5422	14.25	0.997628			-1.39694	1.29392	-4.65595	-0.468248
	2.82451	11.6234	14.1405	0.948077			-1.42478	1.47223	-4.69985	-0.492793
	2.82785	11.6452	14.0932	0.955167			-1.419	1.57118	-4.70311	-0.52651
	2.83148	11.4676	14.0456	0.985942			-1.44383	1.60928	-4.70968	-0.530273
	2.82362	11.2953	14.0077	1.01285			-1.52185	1.59607	-4.73518	-0.543733
	2.83499	11.222	14.048	1.00601			-1.54646	1.482	-4.81763	-0.562125
	2.87388	11.1622	14.1436	0.96379			-1.50344	1.38211	-4.94301	-0.514458
	2.9059	11.2211	14.2774	0.96102			-1.52454	1.38255	-4.98305	-0.411759
	2.93061	11.4431	14.4736	1.05587			-1.54674	1.34985	-4.87451	-0.351441
	2.95875	11.5215	14.6213	1.14799			-1.48247	1.24466	-4.75595	-0.345107
	2.97082	11.4063	14.5797	1.13036			-1.42597	1.22812	-4.77362	-0.344067
	2.94241	11.3875	14.3847	1.04556			-1.436	1.29737	-4.86048	-0.354401
	2.87102	11.4758	14.1785	0.996384			-1.42754	1.32548	-4.92492	-0.375777
	2.78017	11.4606	13.9968	0.997219			-1.38217	1.30774	-4.93013	-0.360863
	2.73135	11.4182	13.802	1.00726			-1.36243	1.27794	-4.84874	-0.334168
	2.71916	11.4292	13.7091	0.978775			-1.32181	1.15887	-4.69934	-0.345697
	2.85929	11.3259	13.6797	0.863336			-1.23274	1.00191	-4.59871	-0.339963
	2.96501	11.1297	13.6714	0.720519			-1.22522	0.950343	-4.56577	-0.281247
	2.99255	11.0438	13.75	0.688091			-1.31589	0.980751	-4.49433	-0.241449
	2.96468	11.0083	13.9469	0.79112			-1.35596	0.974088	-4.38306	-0.245968
	2.94747	10.8666	14.1042	0.904943			-1.33096	0.963776	-4.30799	-0.234912
	2.96256	10.7962	14.117	0.94349			-1.37286	1.02419	-4.26315	-0.252681
	2.95658	10.9705	14.0642	0.931708			-1.44792	1.07026	-4.20672	-0.334632
	2.89321	11.2085	14.0379	0.896247			-1.49446	1.08044	-4.17894	-0.405848
	2.76356	11.3993	14.0341	0.874276			-1.55328	1.14207	-4.17422	-0.421343
	2.59819	11.6586	14.0639	0.895794			-1.58262	1.2288	-4.1417	-0.443679
	2.49292	11.7997	14.0846	0.901037			-1.50281	1.26495	-4.12752	-0.481442
	2.49745	11.5599	14.0473	0.818346			-1.42254	1.31504	-4.17381	-0.480644
	2.54347	11.2983	14.0125	0.730815			-1.47877	1.36323	-4.18536	-0.461343
	2.54407	11.2026	14.0995	0.751834			-1.54826	1.28935	-4.0872	-0.462877
	2.48486	11.0408	14.2637	0.861103			-1.51496	1.17446	-3.98754	-0.438028
	2.40309	10.8253	14.3514	0.971683			-1.45203	1.16858	-3.97612	-0.37365
	2.33914	10.765	14.2988	1.03337			-1.4346	1.21841	-4.03183	-0.323218
	2.2928	10.7943	14.1469	1.02662			-1.43059	1.21481	-4.1364	-0.281019
	2.24248	10.8422	13.9477	0.98535			-1.45572	1.19164	-4.23249	-0.217136
	2.18757	11.0709	13.8079	1.0272			-1.51906	1.18786	-4.20402	-0.212484
	2.15215	11.3946	13.8268	1.15503			-1.50022	1.15852	-4.04996	-0.299146
	2.15825	11.4834	13.9733	1.21201			-1.38891	1.14645	-3.93272	-0.378723
	2.16079	11.3857	14.0844	1.12664			-1.35008	1.19151	-3.88531	-0.41344
	2.08734	11.3721	14.1353	1.00786			-1.40485	1.1995	-3.82895	-0.45449
	1.95182	11.3674	14.1489	0.942474			-1.40252	1.07341	-3.742	-0.478823
	1.82853	11.2617	14.076	0.918192			-1.33513	0.92486	-3.67598	-0.463421
	1.75819	11.1991	13.9147	0.91768			-1.27116	0.833588	-3.66723	-0.411353
	1.75924	11.1492	13.7674	0.908627			-1.15926	0.761195	-3.77174	-0.398975
	1.84364	10.9112	13.6662	0.869636			-1.05731	0.742283	-4.00247	-0.378416
	1.93209	10.6831	13.6177	0.875974			-1.10187	0.816944	-4.21892	-0.33763
	1.96492	10.6549	13.6711	0.992166			-1.22762	0.868539	-4.30307	-0.308688
	1.97176	10.8775	13.7718	1.11941			-1.2658	0.808434	-4.30867	-0.263327
	1.98854	11.1379	13.815	1.13107			-1.26669	0.756424	-4.33934	-0.174084
	2.01116	11.5422	13.8052	1.0565			-1.31996	0.771885	-4.35815	-0.0991433
	2.04895	11.832	13.8509	0.972212			-1.33971	0.8128	-4.28431	-0.0542776
	2.09223	11.6387	13.9419	0.925355			-1.28916	0.901077	-4.12525	0.0205646
	2.10423	11.227	13.9866	0.938318			-1.23578	1.05443	-3.92061	0.109699
	2.09003	10.8923	13.9454	0.966884			-1.17652	1.16078	-3.7448	0.144304
	2.076	10.5655	13.8332	0.902633			-1.08989	1.1566	-3.69527	0.147972
	2.06815	10.2935	13.6647	0.741182			-1.09397	1.14507	-3.75549	0.172345
	2.05919	10.2754	13.5408	0.6307			-1.20371	1.17073	-3.75663	0.171338
	2.06817	10.4156	13.5792	0.652276			-1.24293	1.16739	-3.66911	0.136434
	2.10569	10.4936	13.7248	0.738471			-1.16802	1.17805	-3.64619	0.120529
	2.13179	10.5828	13.8485	0.795027			-1.10911	1.28051	-3.74002	0.103644
	2.11198	10.7865	13.9702	0.799204			-1.07418	1.37221	-3.88109	0.0445701
	2.06336	10.9033	14.0815	0.705576			-1.02379	1.33616	-4.00267	-0.00509169
	2.01026	10.8555	14.1208	0.697537			-1.04738	1.2664	-4.06921	-0.0158592
	1.9619	10.8397	14.129	0.793407			-1.13107	1.21021	-4.04611	-0.0384627
	1.954	10.8624	14.1671	0.912498			-1.12948	1.15726	-4.02255	-0.0755918
	1.98803	10.8451	14.1898	0.92283			-1.07255	1.18826	-4.07269	-0.0838077
	1.99935	11.0067	14.1522	0.840393			-1.0911	1.31284	-4.11545	-0.101996
	1.98199	11.4128	14.1527	0.788294			-1.14628	1.33977	-4.0544	-0.166395
	1.95606	11.6895	14.1914	0.801376			-1.16172	1.22595	-3.95613	-0.211207
	1.91248	11.6841	14.1825	0.84175			-1.20985	1.17804	-3.9112	-0.197314
	1.83617	11.7435	14.1272	0.872657			-1.29558	1.26472	-3.8823	-0.181404
	1.75889	11.7384	14.0722	0.866959			-1.34472	1.40293	-3.85102	-0.174075
	1.70662	11.5435	14.015	0.853882			-1.38209	1.55859	-3.83562	-0.13319
	1.68501	11.3445	13.9952	0.912178			-1.46365	1.67647	-3.80683	-0.0817646
	1.68277	11.2061	14.0511	1.05461			-1.49416	1.63375	-3.76949	-0.0563313
	1.68469	10.9696	14.1018	1.1703			-1.42319	1.49604	-3.82421	-0.0172313
	1.68396	10.7378	14.0103	1.17732			-1.37887	1.45089	-3.9671	0.0341822
	1.68444	10.7456	13.8111	1.11832			-1.39694	1.48268	-4.05417	0.035601
	1.6985	10.8671	13.6919	1.05322			-1.37282	1.45033	-4.05129	0.0141199
	1.71575	10.854	13.6742	0.997212			-1.3036	1.39863	-4.02175	0.0316603
	1.70012	10.7919	13.7138	0.975984			-1.27879	1.39764	-3.97348	0.0478459
	1.6659	10.7752	13.7934	1.0019			-1.25208	1.36032	-3.91601	0.0141978
	1.68554	10.6773	13.8159	1.02937			-1.21707	1.29601	-3.90953	-0.0210899
	1.77083	10.5987	13.7412	1.06382			-1.27306	1.31453	-3.88947	-0.0292605
	1.87041	10.7544	13.6947	1.15431			-1.37579	1.35057	-3.75482	-0.0322399
	1.95266	10.9516	13.7328	1.26855			-1.38516	1.34183	-3.61795	-0.014284
	1.99331	10.9151	13.7369	1.31155			-1.34001	1.40284	-3.62874	0.0470952
	1.98893	10.862	13.6857	1.29039			-1.35428	1.55443	-3.75903	0.0871227
	1.97696	10.8966	13.6582	1.27813			-1.37677	1.61793	-3.89065	0.0591581
	1.97013	10.814	13.6764	1.30909			-1.37842	1.57316	-3.9979	0.00396738
	1.93239	10.7493	13.6996	1.38648			-1.42872	1.47287	-4.0501	-0.0535909
	1.86073	10.8354	13.743	1.47101			-1.48133	1.28418	-4.06373	-0.122953
	1.80311	10.8058	13.7637	1.48122			-1.44349	1.05592	-4.1354	-0.14961
	1.78766	10.576	13.6743	1.39547			-1.3969	0.973159	-4.25257	-0.0902666
	1.80421	10.5004	13.4906	1.3104			-1.45166	1.04113	-4.25355	-0.0220433
	1.80744	10.6515	13.3455	1.29333			-1.48795	1.08207	-4.10373	-0.0110857
	1.77618	10.7867	13.2773	1.311			-1.42887	1.07105	-3.96227	-0.023098
	1.71709	10.8989	13.2282	1.34017			-1.36869	1.10423	-3.90298	-0.0625219
	1.65961	11.0649	13.1857	1.38747			-1.34362	1.15084	-3.89356	-0.145904
	1.63321	11.0754	13.2401	1.4162			-1.30855	1.13182	-3.90571	-0.196495
	1.64255	10.8505	13.259	1.39349			-1.34791	1.09661	-3.89062	-0.153051
	1.66181	10.6408	13.2449	1.37204			-1.49478	1.04539	-3.82088	-0.0833011
	1.68787	10.4373	13.2537	1.36791			-1.56487	0.964199	-3.80419	-0.0320758
	1.73426	10.1056	13.2219	1.3292			-1.51374	0.995781	-3.95381	0.0425183
	1.76337	9.92539	13.1423	1.26761			-1.46392	1.20709	-4.15212	0.133146
	1.74817	10.0643	13.1307	1.24629			-1.41693	1.39386	-4.21566	0.188359
	1.7043	10.0822	13.2065	1.22799			-1.31219	1.42084	-4.11134	0.223516
	1.63506	10.0024	13.2673	1.28419			-1.24022	1.42385	-3.94798	0.263727
	1.54614	9.97734	13.3269	1.3561			-1.22849	1.48357	-3.84834	0.250191
	1.48685	10.0393	13.3397	1.41021			-1.16173	1.57322	-3.89509	0.170683
	1.49062	10.0975	13.2719	1.38664			-1.08013	1.73251	-4.06061	0.100844
	1.53678	10.289	13.1392	1.3942			-1.1071	1.90648	-4.15639	0.0731457
	1.60801	10.6258	13.0452	1.46639			-1.17009	1.92663	-4.09516	0.0733378
	1.6836	10.8323	13.0182	1.52952			-1.16356	1.78158	-3.99294	0.134405
	1.73462	10.9002	13.0183	1.51348			-1.18959	1.67528	-3.98143	0.243102
	1.73627	11.0666	13.0296	1.46889			-1.21857	1.66907	-4.01292	0.295439
	1.70364	11.2433	13.0937	1.45295			-1.18354	1.65498	-4.02345	0.278207
	1.6762	11.2121	13.1597	1.46361			-1.11077	1.58393	-4.00609	0.275004
	1.63761	11.094	13.1872	1.49611			-1.11418	1.49051	-3.95266	0.263526
	1.57649	10.9947	13.1461	1.54051			-1.14308	1.36916	-3.9063	0.192668
	1.512	10.7889	13.1084	1.532			-1.1177	1.30068	-3.92779	0.125076
	1.45602	10.6234	13.0163	1.45691			-1.11613	1.41853	-3.9534	0.109653
	1.38074	10.7706	12.9841	1.39129			-1.12002	1.61605	-3.85503	0.102111
	1.29904	11.0363	13.0928	1.34316			-1.03405	1.70833	-3.6927	0.114121
	1.24111	11.0868	13.2186	1.26492			-0.944288	1.74136	-3.63504	0.181233
	1.22235	11.0954	13.2645	1.19033			-0.972176	1.80428	-3.70329	0.234699
	1.27583	11.1631	13.2507	1.18038			-1.03832	1.82083	-3.7954	0.21515
	1.39367	11.0291	13.2013	1.19044			-1.06648	1.78762	-3.8404	0.189183
	1.49191	10.6901	13.1402	1.18232			-1.12219	1.78484	-3.83142	0.188677
	1.50466	10.4163	13.1122	1.17262			-1.16617	1.76519	-3.78774	0.161057
	1.46136	10.1824	13.0908	1.13925			-1.12031	1.70406	-3.7952	0.119923
	1.42551	9.99997	12.9986	1.07663			-1.075	1.72538	-3.85292	0.11376
	1.42512	10.0034	12.8471	1.05306			-1.13027	1.85097	-3.81259	0.110597
	1.46951	10.1312	12.7506	1.10153			-1.18593	1.93358	-3.61436	0.0920026
	1.54266	10.1502	12.7391	1.14422			-1.17214	1.94687	-3.42589	0.112712
	1.58246	10.1693	12.7515	1.14705			-1.18069	2.02236	-3.38131	0.145799
	1.53468	10.4277	12.7616	1.15711			-1.221	2.1607	-3.42136	0.11063
	1.45228	10.7875	12.7914	1.18327			-1.22519	2.27829	-3.48739	0.0461612
	1.41807	10.9755	12.803	1.19368			-1.22089	2.36113	-3.51528	0.0322543
	1.42654	11.0401	12.8218	1.19561			-1.23661	2.37167	-3.44407	0.0604259
	1.44337	10.9588	12.9662	1.17878			-1.177	2.20622	-3.34009	0.131066
	1.45295	10.5736	13.1429	1.0966			-1.06204	2.01375	-3.37228	0.261434
	1.43603	10.1481	13.1337	0.988845			-1.04669	2.0107	-3.51571	0.369343
	1.41626	10.0158	12.9954	0.934949			-1.1067	2.10794	-3.60753	0.348871
	1.46482	10.0432	12.866	0.916404			-1.12106	2.09552	-3.61566	0.243011
	1.56936	10.0967	12.8044	0.880215			-1.11272	1.97074	-3.60053	0.15041
	1.68252	10.3608	12.8493	0.850751			-1.13595	1.7833	-3.58146	0.0908913
	1.80665	10.7409	12.9787	0.848554			-1.09672	1.55535	-3.56693	0.0589182
	1.95078	10.8365	13.0583	0.852188			-1.00368	1.4367	-3.58313	0.0755879
	2.07753	10.7545	13.0299	0.871736			-0.982269	1.49857	-3.5608	0.100694
	2.15729	10.5802	13.0154	0.890228			-1.00779	1.59133	-3.45699	0.1031
	2.17406	10.2818	13.063	0.847939			-0.987194	1.61783	-3.4055	0.138402
	2.10876	10.0404	13.0967	0.762189			-0.979984	1.66827	-3.48238	0.234831
	1.97505	10.1464	13.0907	0.750349			-1.05244	1.75702	-3.56375	0.305473
	1.83267	10.5135	13.0991	0.849043			-1.09012	1.78472	-3.52508	0.304277
	1.73115	10.8379	13.1131	0.968028			-1.06144	1.76757	-3.4073	0.284978
	1.65671	11.0993	13.0992	1.03324			-1.05918	1.76335	-3.26915	0.259629
	1.60113	11.3086	13.1007	1.03757			-1.03011	1.71516	-3.20181	0.218162
	1.60286	11.2363	13.0982	1.00513			-0.952035	1.64832	-3.30889	0.212338
	1.67166	10.9108	12.9975	0.983944			-0.918039	1.72518	-3.50835	0.263655
	1.75361	10.6992	12.8586	1.03426			-0.959787	1.92389	-3.6097	0.314526
	1.79176	10.6539	12.7402	1.11066			-0.939361	2.05132	-3.58822	0.359469
	1.75429	10.622	12.7478	1.12121			-0.875922	2.13729	-3.58292	0.44514
	1.63981	10.7444	12.749	1.08648			-0.896034	2.25497	-3.60739	0.544308
	1.52695	11.0213	12.7868	1.09749			-0.937786	2.31007	-3.60326	0.586711
	1.47499	11.0697	12.845	1.17222			-0.907106	2.24065	-3.53404	0.566863
	1.44245	10.885	12.877	1.27309			-0.879164	2.1339	-3.38264	0.492821
	1.39413	10.7968	12.8792	1.37137			-0.880905	1.97216	-3.18073	0.344517
	1.35711	10.762	12.8491	1.40641			-0.823276	1.76729	-3.09434	0.180461
	1.3769	10.6579	12.7246	1.35933			-0.776383	1.69173	-3.23688	0.111055
	1.46338	10.5581	12.6092	1.299			-0.829545	1.80401	-3.44792	0.12888
	1.60834	10.591	12.6157	1.25354			-0.872471	1.93106	-3.52765	0.161989
	1.75596	10.4325	12.7323	1.17014			-0.816057	1.96386	-3.48658	0.19779
	1.84514	10.1528	12.8448	1.05522			-0.782996	1.97677	-3.43721	0.190319
	1.84573	10.0603	12.9284	1.02635			-0.821647	1.97057	-3.43009	0.197172
	1.77308	10.1632	13.039	1.13782			-0.835071	1.90208	-3.49204	0.225795
	1.65305	10.3227	13.1674	1.31284			-0.836987	1.83885	-3.58161	0.335645
	1.48099	10.5534	13.2873	1.44725			-0.873433	1.816	-3.55739	0.458837
	1.27774	10.7416	13.3861	1.48832			-0.870033	1.74768	-3.43808	0.506449
	1.1321	10.626	13.3745	1.43222			-0.808875	1.68803	-3.38305	0.508182
	1.13276	10.3945	13.2126	1.36467			-0.827945	1.79281	-3.42449	0.495205
	1.27188	10.3887	13.0427	1.38859			-0.917736	1.98334	-3.4351	0.454582
	1.44144	10.4803	12.9908	1.45707			-0.949716	2.09325	-3.37347	0.444118
	1.49491	10.4863	12.9735	1.46056			-0.958077	2.12571	-3.29106	0.522968
	1.37226	10.5387	12.9258	1.40058			-0.998465	2.06583	-3.23121	0.617366
	1.18394	10.6535	12.858	1.35247			-0.961815	1.86918	-3.26349	0.640385
	1.07125	10.6596	12.769	1.3376			-0.820796	1.68397	-3.3918	0.6158
	1.0715	10.6938	12.7348	1.38235			-0.717639	1.70292	-3.4847	0.555821
	1.1414	10.8779	12.8489	1.49753			-0.673053	1.84815	-3.42476	0.446419
	1.22015	10.921	13.0509	1.59541			-0.62566	2.00573	-3.32543	0.365293
	1.24078	10.6921	13.1289	1.60227			-0.6362	2.17778	-3.33062	0.374355
	1.16302	10.4717	13.018	1.5729			-0.726599	2.3257	-3.40949	0.390121
	1.02628	10.3433	12.8217	1.56823			-0.760257	2.33243	-3.44497	0.350789
	0.926744	10.199	12.6648	1.53075			-0.710588	2.26292	-3.40309	0.30788
	0.912566	10.1092	12.5863	1.40994			-0.708955	2.24618	-3.3094	0.284879
	0.922694	10.1498	12.5988	1.23874			-0.732353	2.23867	-3.24141	0.256813
	0.902204	10.1445	12.6573	1.06943			-0.693248	2.19874	-3.31386	0.263892
	0.86592	10.0277	12.6675	0.976609			-0.659083	2.22609	-3.47814	0.310407
	0.876971	10.0455	12.6377	1.03632			-0.704113	2.30902	-3.54171	0.317889
	0.990141	10.1883	12.6423	1.19759			-0.730009	2.28878	-3.46136	0.288045
	1.18345	10.1978	12.6386	1.30146			-0.723024	2.21517	-3.38667	0.303496
	1.32974	10.1635	12.5549	1.31736			-0.784526	2.21061	-3.40171	0.329945
	1.34788	10.2204	12.4775	1.33826			-0.844885	2.22245	-3.4613	0.296231
	1.2925	10.2295	12.4976	1.39111			-0.81287	2.22644	-3.52383	0.247894
	1.20807	10.2216	12.6037	1.43974			-0.778282	2.28997	-3.52824	0.249839
	1.08961	10.3866	12.7657	1.46389			-0.812671	2.33203	-3.46835	0.275272
	0.964403	10.5309	12.9011	1.42786			-0.828287	2.25194	-3.46076	0.309344
	0.875261	10.3856	12.8689	1.32342			-0.852282	2.18911	-3.60139	0.366473
	0.84112	10.2167	12.6754	1.25346			-0.975906	2.26469	-3.75513	0.386378
	0.860193	10.2499	12.5023	1.27328			-1.09744	2.3628	-3.74731	0.333585
	0.898766	10.3283	12.4575	1.29855			-1.10899	2.38536	-3.62362	0.289724
	0.903376	10.3575	12.4875	1.26055			-1.08701	2.33987	-3.52374	0.312876
	0.863355	10.3549	12.5635	1.21274			-1.0843	2.21957	-3.51449	0.366938
	0.820728	10.2364	12.6933	1.211			-1.01733	2.04115	-3.57061	0.432972
	0.817212	10.0091	12.8493	1.25396			-0.930881	1.98533	-3.63353	0.510485
	0.835666	9.94405	12.9616	1.32338			-0.937852	2.13292	-3.59267	0.528668
	0.861469	10.1074	13.0388	1.36275			-0.940865	2.35117	-3.47996	0.446218
	0.907248	10.1971	13.0345	1.30305			-0.879219	2.51849	-3.4602	0.342235
	0.92862	10.1459	12.9018	1.18074			-0.832012	2.67217	-3.53911	0.278617
	0.884153	10.2089	12.7289	1.11896			-0.821752	2.7583	-3.53827	0.242418
	0.827309	10.3362	12.6452	1.13185			-0.733131	2.70583	-3.38156	0.250562
	0.830478	10.3617	12.5912	1.13858			-0.632214	2.64153	-3.18726	0.321382
	0.86478	10.3903	12.5057	1.11606			-0.633063	2.61298	-3.08471	0.372091
	0.896723	10.3981	12.4419	1.07901			-0.657637	2.48609	-3.1579	0.34255
	0.900923	10.1503	12.3969	1.03317			-0.651415	2.2646	-3.38245	0.285033
	0.858298	9.81998	12.3267	1.01561			-0.700563	2.11189	-3.56205	0.254005
	0.818738	9.70528	12.2987	1.06379			-0.777962	2.04624	-3.52898	0.223994
	0.847614	9.6988	12.3427	1.104			-0.773016	2.0019	-3.35322	0.210962
	0.888721	9.65112	12.3812	1.06556			-0.774905	2.01496	-3.24051	0.24038
	0.849201	9.67342	12.4152	1.01459			-0.871149	2.07647	-3.24352	0.250479
	0.752578	9.78216	12.5283	1.03375			-0.947094	2.10305	-3.29917	0.206987
	0.682882	9.85076	12.6776	1.09437			-0.923334	2.12804	-3.34854	0.18072
	0.679389	9.93765	12.7504	1.12549			-0.894308	2.22767	-3.35072	0.198
	0.723889	10.1378	12.7019	1.11649			-0.882191	2.29854	-3.29928	0.208719
	0.769051	10.2499	12.612	1.09433			-0.826638	2.2191	-3.29248	0.225468
	0.775297	10.1307	12.4604	1.1244			-0.77847	2.13436	-3.37735	0.284168
	0.741512	10.0076	12.3709	1.25314			-0.779005	2.16117	-3.3957	0.330254
	0.731562	9.9974	12.4801	1.39325			-0.749293	2.18215	-3.26471	0.333918
	0.760334	9.9441	12.6595	1.36918			-0.690908	2.1366	-3.11178	0.340258
	0.752745	9.9313	12.7275	1.16171			-0.715567	2.1113	-3.07639	0.344243
	0.675217	10.1029	12.7064	0.948966			-0.771394	2.04727	-3.16633	0.307712
	0.581825	10.2467	12.6999	0.867061			-0.748639	1.94475	-3.34284	0.284304
	0.52907	10.2267	12.6953	0.919174			-0.741983	1.95653	-3.47653	0.318029
	0.539964	10.2525	12.7042	1.02998			-0.836836	2.06097	-3.43311	0.334503
	0.640494	10.3029	12.7007	1.10754			-0.92223	2.07123	-3.29648	0.285758
	0.788929	10.1486	12.5383	1.10639			-0.936021	2.02038	-3.26509	0.223586
	0.911316	9.9512	12.4143	1.10856			-0.961242	2.03414	-3.35167	0.18286
	0.973069	9.90004	12.4269	1.20616			-0.955241	2.07327	-3.40071	0.156937
	0.981523	9.83369	12.5439	1.32396			-0.879445	2.12202	-3.36129	0.179547
	0.948112	9.65673	12.6078	1.34334			-0.823579	2.23818	-3.30376	0.217437
	0.887318	9.52227	12.5913	1.27882			-0.836407	2.32338	-3.28881	0.162258
	0.816195	9.43115	12.5688	1.22129			-0.822094	2.23917	-3.36427	0.0248259
	0.737302	9.28803	12.5647	1.21029			-0.768336	2.09549	-3.48521	-0.0561347
	0.644892	9.23655	12.574	1.24395			-0.769469	2.05244	-3.48958	-0.0546888
	0.559571	9.38012	12.6092	1.2772			-0.761893	2.06359	-3.32185	-0.0425919
	0.519767	9.52791	12.625	1.22646			-0.677138	2.07446	-3.19936	-0.0222887
	0.521587	9.60857	12.5446	1.10924			-0.624922	2.14033	-3.26681	0.0186352
	0.538775	9.7968	12.4469	1.07075			-0.668869	2.20943	-3.41646	0.0238291
	0.597916	9.98359	12.4402	1.17921			-0.671372	2.19517	-3.52306	-0.00164048
	0.722799	9.89579	12.4704	1.32089			-0.605685	2.22538	-3.56412	0.00247902
	0.86907	9.7529	12.4605	1.38668			-0.590673	2.36488	-3.53623	0.0267533
	0.956126	9.74869	12.4281	1.35083			-0.587297	2.40137	-3.49312	0.0479078
	0.917827	9.68167	12.3759	1.23695			-0.544107	2.25268	-3.5391	0.107179
	0.740867	9.56286	12.2953	1.14032			-0.564876	2.04247	-3.61818	0.192722
	0.533756	9.61382	12.2758	1.1602			-0.666719	1.84071	-3.62138	0.220106
	0.453863	9.73106	12.3146	1.25412			-0.721691	1.6726	-3.5787	0.173669
	0.547993	9.7392	12.3161	1.31828			-0.752288	1.64984	-3.58634	0.105446
	0.716395	9.75322	12.2499	1.37683			-0.84023	1.7363	-3.60765	0.00710002
	0.818137	9.77999	12.2166	1.47821			-0.87712	1.78107	-3.58112	-0.117173
	0.800092	9.67318	12.259	1.57164			-0.809964	1.77151	-3.52657	-0.180315
	0.704009	9.57612	12.3445	1.60541			-0.76312	1.80493	-3.47023	-0.165515
	0.6108	9.73542	12.4451	1.59516			-0.779677	1.85556	-3.46453	-0.147581
	0.554672	10.0453	12.5379	1.54577			-0.742691	1.85935	-3.60485	-0.132959
	0.51755	10.2757	12.583	1.4661			-0.671291	1.88308	-3.87655	-0.0681018
	0.444398	10.4731	12.5921	1.42092			-0.648336	1.94303	-4.08124	0.0024056
	0.352472	10.6337	12.5841	1.42138			-0.612298	1.93788	-4.0917	0.0249708
	0.327277	10.5439	12.5798	1.39913			-0.556726	1.89017	-3.99691	0.0178127
	0.387925	10.3503	12.425	1.32817			-0.598831	1.94668	-3.90094	-0.0219539
	0.479471	10.306	12.1904	1.27272			-0.712343	2.09277	-3.85215	-0.121115
	0.556279	10.2231	12.0384	1.2607			-0.742938	2.20581	-3.86782	-0.204988
	0.589749	9.96112	12.0169	1.28641			-0.738996	2.29987	-3.91923	-0.203338
	0.569797	9.79537	12.0954	1.37059			-0.780573	2.36733	-3.91366	-0.172725
	0.549372	9.77921	12.2268	1.46923			-0.769018	2.3343	-3.86423	-0.159741
	0.557184	9.71741	12.2836	1.49231			-0.690912	2.26262	-3.8639	-0.113146
	0.541867	9.70014	12.2237	1.44125			-0.68622	2.23707	-3.89987	-0.0278176
	0.494604	9.87682	12.1924	1.39078			-0.742737	2.18547	-3.88736	0.0312085
	0.464599	10.0505	12.2679	1.32785			-0.760308	2.06232	-3.81452	0.0563182
	0.476824	10.1285	12.318	1.21645			-0.803593	1.98867	-3.7371	0.0687277
	0.501306	10.2616	12.3843	1.10159			-0.900259	1.97369	-3.65582	0.0285478
	0.526215	10.372	12.451	1.03142			-0.930871	1.92377	-3.60049	-0.0312762
	0.555024	10.2897	12.5208	1.00162			-0.873291	1.86105	-3.60785	-0.0144324
	0.577335	10.1836	12.5704	1.01723			-0.827441	1.90315	-3.63868	0.0424704
	0.591199	10.2328	12.5838	1.08167			-0.791606	1.98034	-3.63766	0.0253544
	0.596075	10.273	12.5196	1.12782			-0.723912	1.98807	-3.6571	-0.0530474
	0.569423	10.2089	12.3278	1.12507			-0.726117	1.98954	-3.72428	-0.12127
	0.481113	10.2054	12.1403	1.12617			-0.821127	2.03121	-3.72634	-0.170132
	0.393316	10.2552	12.1373	1.15459			-0.860494	2.0387	-3.61966	-0.168113
	0.388932	10.193	12.2702	1.15438			-0.801477	2.05822	-3.49763	-0.0889483
	0.467078	10.1613	12.3785	1.10904			-0.767993	2.17276	-3.41475	-0.0167851
	0.583524	10.275	12.4468	1.07002			-0.764864	2.25238	-3.36992	-0.0347199
	0.690763	10.2486	12.5105	1.04136			-0.737966	2.22529	-3.41228	-0.0666888
	0.724522	10.0421	12.5686	1.03803			-0.750165	2.21963	-3.53064	-0.0280635
	0.672138	9.99055	12.6777	1.10463			-0.815582	2.24357	-3.59834	0.0573994
	0.603017	10.1353	12.8437	1.20039			-0.822344	2.22403	-3.60043	0.142751
	0.544628	10.289	12.8996	1.22415			-0.816676	2.24729	-3.61919	0.207501
	0.468658	10.4744	12.7864	1.18385			-0.929757	2.37826	-3.67377	0.200716
	0.385441	10.6755	12.6633	1.16656			-1.05403	2.4823	-3.7103	0.131154
	0.336092	10.6606	12.6385	1.1756			-1.06154	2.50494	-3.72813	0.110491
	0.334648	10.5123	12.6686	1.19005			-1.02642	2.53913	-3.70336	0.164438
	0.365946	10.4778	12.6906	1.21661			-1.01318	2.54395	-3.61162	0.178099
	0.421251	10.4656	12.6479	1.24631			-0.965415	2.41107	-3.55875	0.122577
	0.471419	10.2754	12.4837	1.22874			-0.894817	2.21337	-3.64022	0.0792502
	0.484108	10.0836	12.2971	1.28485			-0.865012	2.08669	-3.74667	0.079074
	0.479902	10.0189	12.2598	1.3582			-0.807691	2.0082	-3.72117	0.101853
	0.525039	9.90169	12.3466	1.38445			-0.706894	2.01758	-3.62564	0.15732
	0.628994	9.7553	12.3569	1.36272			-0.698857	2.19173	-3.57065	0.214111
	0.7451	9.81632	12.2772	1.37018			-0.803831	2.40691	-3.58961	0.224854
	0.837243	9.92267	12.2273	1.42776			-0.887274	2.47214	-3.70615	0.243088
	0.859323	9.89845	12.2677	1.45908			-0.945236	2.48099	-3.88202	0.339671
	0.791872	9.85307	12.3832	1.43236			-1.05479	2.53305	-3.9761	0.450445
	0.705851	9.92169	12.5426	1.36846			-1.09529	2.53748	-3.95474	0.492206
	0.678683	9.93204	12.6162	1.27518			-1.00319	2.50057	-3.94149	0.497629
	0.68091	9.93118	12.5437	1.18354			-0.918146	2.50079	-3.96249	0.51352
	0.673707	10.0581	12.4717	1.13018			-0.898304	2.46564	-3.95314	0.539223
	0.66374	10.1238	12.4777	1.05063			-0.857304	2.35816	-3.92169	0.576025
	0.685163	10.0133	12.4401	0.957967			-0.832897	2.31345	-3.89275	0.61417
	0.754621	9.9426	12.2905	0.912708			-0.865823	2.34538	-3.82968	0.573112
	0.850493	9.96102	12.1121	0.949376			-0.83871	2.3173	-3.74719	0.44855
	0.914275	9.91136	11.9845	1.00389			-0.727461	2.2505	-3.74126	0.365489
	0.907858	9.9048	11.9305	1.03977			-0.671954	2.26081	-3.78811	0.381691
	0.881069	10.0662	11.9555	1.0709			-0.697169	2.31145	-3.80644	0.403366
	0.902935	10.172	11.9905	1.08377			-0.690094	2.31345	-3.78578	0.370068
	0.966298	10.0538	11.9371	1.06984			-0.673332	2.32156	-3.75209	0.304309
	1.00673	9.92691	11.8674	1.09185			-0.68679	2.33795	-3.66857	0.228039
	1.0208	9.86305	11.9274	1.1649			-0.637699	2.27446	-3.5521	0.186372
	1.06193	9.69239	12.0707	1.21966			-0.553534	2.22139	-3.48776	0.238978
	1.12743	9.51249	12.1448	1.21588			-0.590445	2.31194	-3.4483	0.35666
	1.18431	9.54756	12.1409	1.19774			-0.715185	2.44657	-3.38588	0.394572
	1.19156	9.64014	12.101	1.17893			-0.766979	2.45048	-3.35699	0.354067
	1.1074	9.63695	12.0489	1.14394			-0.778985	2.36037	-3.40694	0.319241
	0.952542	9.67071	12.0332	1.12567			-0.81601	2.18714	-3.44256	0.286103
	0.849002	9.60301	12.1078	1.12761			-0.796429	1.94062	-3.42112	0.250848
	0.870724	9.36208	12.1525	1.10621			-0.75586	1.78152	-3.38585	0.246191
	0.958637	9.13248	12.0807	1.0721			-0.813054	1.80552	-3.35084	0.231942
	1.02948	9.14023	11.986	1.07473			-0.896303	1.86529	-3.33641	0.15128
	1.01754	9.23743	11.9596	1.07944			-0.884212	1.85938	-3.38525	0.0841822
	0.910618	9.36298	11.986	1.04744			-0.867587	1.86133	-3.4591	0.109521
	0.76135	9.64523	12.0437	1.0279			-0.903915	1.86959	-3.45508	0.142337
	0.675637	9.96465	12.0942	1.04721			-0.923679	1.81724	-3.40248	0.12375
	0.705673	10.0849	12.0744	1.08221			-0.956076	1.77645	-3.40514	0.113161
	0.808808	10.1154	12.0404	1.14144			-1.08034	1.8375	-3.44912	0.125665
	0.918757	10.1665	12.1311	1.23034			-1.19895	1.91881	-3.47436	0.121539
	0.996641	10.0686	12.2865	1.28034			-1.18748	1.96562	-3.49273	0.127852
	1.0368	9.86413	12.3225	1.26091			-1.11823	2.07185	-3.52382	0.130213
	1.05582	9.82963	12.229	1.25738			-1.05183	2.19855	-3.50937	0.059334
	1.07614	9.88388	12.1498	1.29218			-0.951273	2.21892	-3.47683	-0.0363146
	1.07335	9.76914	12.1157	1.30191			-0.872222	2.18802	-3.4848	-0.0457628
	1.0067	9.61981	12.1093	1.25742			-0.915713	2.18763	-3.49322	-0.00781842
	0.925053	9.5781	12.1419	1.1988			-0.972118	2.11862	-3.45705	-0.00435391
	0.908113	9.44755	12.1799	1.12882			-0.933528	1.99171	-3.44473	-0.00926414
	0.946163	9.31857	12.1869	1.0636			-0.910115	1.97105	-3.48492	0.00197557
	0.979519	9.38407	12.2426	1.04025			-0.937592	2.02964	-3.52407	-0.00506377
	1.00551	9.50558	12.3717	1.01736			-0.90338	2.07773	-3.58241	0.00487067
	1.03527	9.47951	12.4293	0.930218			-0.834589	2.15635	-3.67315	0.0637174
	1.04872	9.44656	12.3591	0.828453			-0.824925	2.25501	-3.71974	0.0921442
	1.02421	9.46982	12.2499	0.792381			-0.794917	2.22075	-3.66872	0.0257933
	0.967362	9.41366	12.1969	0.797455			-0.712062	2.08269	-3.5817	-0.0581407
	0.904864	9.3458	12.2275	0.829382			-0.690548	1.98599	-3.48895	-0.0909264
	0.877828	9.38642	12.3522	0.900044			-0.71472	1.95212	-3.37238	-0.0875485
	0.917159	9.37146	12.4785	0.977472			-0.692396	1.94162	-3.28286	-0.0447559
	0.979037	9.2076	12.4527	1.01599			-0.688576	2.00597	-3.27199	0.038295
	0.99488	9.13634	12.2749	1.04941			-0.8021	2.11997	-3.30168	0.0858797
	0.952972	9.23062	12.1191	1.10393			-0.923957	2.14844	-3.35107	0.0832148
	0.898307	9.27928	12.0375	1.12974			-0.971442	2.13778	-3.4797	0.116267
	0.85662	9.25544	11.9334	1.11584			-0.992833	2.22196	-3.63422	0.172027
	0.855651	9.32806	11.7998	1.11285			-0.963267	2.31428	-3.67657	0.152682
	0.928221	9.44475	11.7127	1.1358			-0.824616	2.27883	-3.61484	0.0661729
	1.02173	9.52629	11.7014	1.16569			-0.702952	2.18721	-3.52546	0.00785328
	1.02648	9.74681	11.7841	1.2299			-0.742186	2.12226	-3.41055	-0.00439033
	0.926944	10.0558	11.95	1.32865			-0.824752	2.04531	-3.26812	0.0131899
	0.812253	10.1647	12.0611	1.39382			-0.859311	2.02843	-3.17023	0.0393174
	0.750498	10.1799	12.0089	1.41428			-0.895501	2.12274	-3.10278	-0.00303079
	0.756819	10.264	11.9443	1.41864			-0.89694	2.19097	-3.052	-0.151909
	0.802735	10.2156	12.0111	1.36866			-0.785095	2.1532	-3.07641	-0.299342
	0.820757	9.92999	12.1599	1.23568			-0.721769	2.11245	-3.16565	-0.353409
	0.768485	9.64818	12.2659	1.10206			-0.665834	2.1013	-3.19166	-0.361785
	0.668934	9.44205	12.2526	1.02354			-0.632823	2.03116	-3.11096	-0.376936
	0.567203	9.2675	12.0822	0.980243			-0.642705	1.94995	-3.04236	-0.361859
	0.467137	9.25436	11.8484	0.972871			-0.77962	1.94929	-3.04726	-0.320984
	0.39522	9.45826	11.7748	1.01541			-0.945753	1.98659	-3.11392	-0.297763
	0.38533	9.62985	11.8815	1.07121			-0.998673	1.98312	-3.21916	-0.285093
	0.408901	9.62292	11.9713	1.11149			-0.982463	2.01662	-3.30306	-0.260932
	0.41157	9.63144	11.9324	1.17153			-0.97637	2.08429	-3.26902	-0.258889
	0.403955	9.69853	11.8672	1.24522			-0.910313	2.08524	-3.15481	-0.261403
	0.415381	9.65961	11.8497	1.27257			-0.800338	2.05519	-3.09196	-0.207867
	0.405548	9.61205	11.8908	1.24146			-0.749809	2.07818	-3.06386	-0.126386
	0.372045	9.7077	11.9874	1.22058			-0.728949	2.05883	-2.99901	-0.0985254
	0.359166	9.77905	12.0564	1.23591			-0.656991	1.94948	-2.93825	-0.120387
	0.37607	9.8076	12.0321	1.2873			-0.624276	1.8751	-2.94231	-0.147495
	0.409655	10.0049	12.0378	1.3733			-0.665674	1.82866	-2.98269	-0.185255
	0.481456	10.2087	12.1674	1.43758			-0.654564	1.71988	-3.05206	-0.199532
	0.571653	10.1663	12.2518	1.41419			-0.605185	1.65441	-3.14473	-0.149105
	0.62768	10.1087	12.1191	1.35191			-0.622136	1.70916	-3.14376	-0.132195
	0.65587	10.1941	11.9127	1.33791			-0.633942	1.75289	-3.03142	-0.191991
	0.66048	10.231	11.777	1.34219			-0.561983	1.71733	-2.94296	-0.266927
	0.606456	10.2071	11.7886	1.31382			-0.535462	1.709	-2.96233	-0.28917
	0.502977	10.2946	11.9085	1.28709			-0.601804	1.73338	-3.00247	-0.30173
	0.427163	10.3783	12.0001	1.2812			-0.654615	1.73228	-3.01224	-0.313286
	0.415783	10.3266	11.911	1.29411			-0.684325	1.77143	-3.00803	-0.25623
	0.42659	10.3149	11.7395	1.34374			-0.742415	1.88392	-2.98919	-0.161088
	0.429994	10.4177	11.7268	1.41272			-0.762237	1.94183	-2.99544	-0.11114
	0.417478	10.3786	11.8954	1.40765			-0.711291	1.91548	-3.09665	-0.114425
	0.392535	10.1452	12.0505	1.32029			-0.704921	1.95218	-3.23694	-0.168474
	0.375485	9.86867	12.0773	1.26034			-0.752447	2.02338	-3.26125	-0.291996
	0.39605	9.47455	12.0122	1.28281			-0.732842	2.01937	-3.18411	-0.388675
	0.424039	8.9491	11.9241	1.33953			-0.675632	1.96985	-3.12363	-0.360689
	0.394435	8.64043	11.9391	1.38705			-0.670999	1.87516	-3.11187	-0.266538
	0.313011	8.72695	12.0903	1.41425			-0.648766	1.61196	-3.14888	-0.205558
	0.235073	9.01288	12.1964	1.38113			-0.544833	1.29849	-3.24829	-0.165669
	0.194928	9.36879	12.0872	1.30122			-0.489023	1.16957	-3.32713	-0.182559
	0.204321	9.75047	11.8847	1.24546			-0.49747	1.20047	-3.30154	-0.243853
	0.248902	9.88998	11.7852	1.21685			-0.459565	1.25931	-3.25593	-0.296634
	0.257017	9.72981	11.8068	1.18994			-0.406112	1.34072	-3.26144	-0.266186
	0.195753	9.59704	11.8682	1.21079			-0.416322	1.39884	-3.24992	-0.207114
	0.128971	9.5755	11.901	1.29634			-0.391686	1.34571	-3.18396	-0.183152
	0.130802	9.5084	11.8343	1.36473			-0.323724	1.26193	-3.14718	-0.169322
	0.197273	9.50989	11.71	1.38643			-0.377024	1.25926	-3.19394	-0.171468
	0.280404	9.71999	11.6961	1.38927			-0.454612	1.27794	-3.30367	-0.2246
	0.34843	9.92212	11.8231	1.3503			-0.497274	1.28339	-3.47679	-0.275218
	0.397386	9.8993	11.9044	1.25133			-0.529167	1.38052	-3.62947	-0.264055
	0.435977	9.80388	11.8292	1.10471			-0.604523	1.59287	-3.63227	-0.244443
	0.475743	9.72456	11.6641	1.05941			-0.630566	1.76582	-3.48988	-0.234868
	0.505023	9.52994	11.5182	1.0189			-0.605615	1.85568	-3.37309	-0.169531
	0.485161	9.36099	11.4566	0.990516			-0.641338	1.90017	-3.34086	-0.0651094
	0.408076	9.34731	11.5175	1.04454			-0.702542	1.84252	-3.33477	-0.00280499
	0.328894	9.24966	11.5891	1.20166			-0.690145	1.69975	-3.32241	0.0474061
	0.298431	8.98098	11.5271	1.41326			-0.673339	1.61157	-3.26621	0.138126
	0.32915	8.85388	11.4156	1.6329			-0.719358	1.58042	-3.14911	0.216404
	0.404678	8.91107	11.4435	1.7856			-0.709205	1.49408	-3.06871	0.232185
	0.479303	8.99888	11.5989	1.79591			-0.627178	1.43021	-3.12628	0.212821
	0.480577	9.20902	11.7186	1.71246			-0.595224	1.4591	-3.21541	0.13633
	0.405833	9.57191	11.7621	1.62872			-0.57334	1.4744	-3.20773	-0.00925336
	0.326889	9.73361	11.7737	1.54627			-0.492883	1.40121	-3.14551	-0.144275
[truncated: 5,501 more rows]

## Sheet: panel_E
	0.196879	0.643477	-0.0465671	2.32062		-0.0426483	0.678703	0.557843	2.00254
	2.62634	2.89033	0.498995	-0.474076		-0.26454	2.06066	0.490846	0.281426
	3.80394	3.19943	1.29683	0.287451		2.4057	-1.14787	2.33266	0.994968
	3.21807	3.69026	3.73093	1.5303		1.11423	1.91999	0.577658	-1.00905
	2.64137	5.7049	4.90523	4.22073		0.102075	0.399453	0.605715	0.866797
	6.36648	3.74546	5.73467	3.88768		1.94293	0.896018	0.29288	3.18581
	5.76071	7.1719	4.44337	3.58288		1.21233	0.965259	3.79124	1.88076
	5.37696	5.05466	2.63447	3.83477		-0.225695	0.841136	0.767491	2.67554
	5.18582	5.09253	6.05144	4.37455		-0.397988	0.525999	2.94966	0.93398
	3.80815	7.03831	5.88513	3.85075		0.14664	3.72721	2.85166	2.16931

## Sheet: panel_F
	0.0887399	0.00424367	-0.341644	-0.152734		0.441674	0.0761802	-0.313752	0.189983
	0.154597	-0.0447683	-0.272238	-0.135059		0.51343	0.0360211	-0.253919	0.245436
	0.232942	-0.0349492	-0.200027	-0.0777824		0.540921	0.0365611	-0.119347	0.343788
	0.272708	-0.0361951	-0.186587	0.0213868		0.555311	0.00911525	0.0231666	0.385664
	0.287845	-0.0622823	-0.227188	0.0602599		0.517266	-0.0151759	0.0480327	0.337918
	0.322797	-0.0890486	-0.264599	-0.00156388		0.405314	0.0565091	-0.0171433	0.236796
	0.361576	-0.104347	-0.251725	-0.0706369		0.376814	0.155557	-0.0679282	0.139233
	0.36977	-0.0832746	-0.210861	-0.0991498		0.485028	0.172454	-0.127777	0.0912471
	0.353261	-0.00853412	-0.197797	-0.124967		0.549417	0.156074	-0.270441	0.133502
	0.295077	0.0846002	-0.238443	-0.138283		0.494735	0.142386	-0.42194	0.213337
	0.204319	0.127213	-0.291259	-0.125566		0.432094	0.079018	-0.501163	0.221845
	0.129763	0.103059	-0.30149	-0.131856		0.401236	0.0131093	-0.517659	0.126879
	0.11698	0.0470379	-0.260588	-0.147179		0.389666	0.0300282	-0.458355	-0.0166771
	0.127198	-0.0163612	-0.207474	-0.0948684		0.47248	0.0651832	-0.319734	-0.148082
	0.129038	-0.0533167	-0.190563	-0.00897979		0.602559	0.0432817	-0.186647	-0.200387
	0.14089	-0.0419564	-0.216694	0.0298316		0.600642	0.0509432	-0.133754	-0.110693
	0.15324	0.00192547	-0.245977	0.0503158		0.464079	0.116584	-0.0968465	0.0883003
	0.150519	0.0508064	-0.243223	0.0906837		0.350189	0.149022	-0.0656351	0.302251
	0.131562	0.1052	-0.217576	0.0961428		0.303864	0.149828	-0.0969561	0.482682
	0.109989	0.153836	-0.205451	0.0530816		0.305083	0.180937	-0.155271	0.616643
	0.0732208	0.149288	-0.221664	0.014894		0.392539	0.187192	-0.147562	0.641391
	0.0533754	0.0943803	-0.242537	-0.0226632		0.513549	0.151394	-0.0937659	0.536673
	0.0802981	0.0373073	-0.217341	-0.0637024		0.549741	0.207097	-0.0638672	0.407658
	0.116495	0.0167917	-0.140775	-0.0451828		0.521123	0.359241	-0.0333943	0.335978
	0.117341	0.0339372	-0.0627268	0.0407578		0.493968	0.459289	-0.0124514	0.30761
	0.0867762	0.0922214	-0.0376603	0.0853337		0.415368	0.472507	-0.0627516	0.27886
	0.05352	0.156664	-0.0656709	0.0440991		0.252327	0.456031	-0.140762	0.221602
	0.016011	0.172572	-0.0963279	-0.0106867		0.152266	0.370501	-0.164379	0.116283
	-0.00270797	0.147628	-0.0784689	-0.0405459		0.178142	0.235148	-0.167319	0.0354391
	0.00333076	0.12662	-0.0152838	-0.0520071		0.249973	0.195709	-0.200709	0.0750239
	-0.0008885	0.11703	0.0291522	-0.0178937		0.322702	0.255297	-0.201005	0.204339
	-0.0284791	0.101981	0.0207589	0.0294209		0.377564	0.29999	-0.176804	0.346287
	-0.0430238	0.0966171	-0.00761258	-0.00498203		0.301212	0.346901	-0.204434	0.480844
	-0.0197293	0.0717291	0.00404769	-0.0902013		0.0796451	0.433188	-0.265345	0.591864
	0.00059285	0.0279345	0.0689606	-0.102674		-0.0990842	0.441088	-0.277598	0.607055
	0.00638191	-0.00109397	0.137075	-0.0568994		-0.141956	0.33317	-0.268904	0.529177
	0.00624705	0.0111019	0.128382	-0.0273433		-0.115902	0.235697	-0.269904	0.439207
	0.0162446	0.0324422	0.065801	-0.000856331		-0.0389534	0.156272	-0.217477	0.370557
	0.0449321	0.0256871	-0.00256249	0.0264203		0.0933468	0.0332555	-0.134329	0.326267
	0.0997188	0.00211033	-0.0078778	0.00276415		0.175542	-0.0541109	-0.111778	0.313193
	0.146786	-0.0322173	0.0323478	-0.0369946		0.175844	-0.0757963	-0.133154	0.320102
	0.13268	-0.0727217	0.0528672	-0.0390808		0.193852	-0.0376056	-0.124213	0.301403
	0.0779384	-0.10119	0.0308387	-0.0535936		0.205858	-0.022577	-0.134983	0.291357
	0.0309871	-0.108097	-0.00154938	-0.120981		0.123211	0.0415795	-0.176968	0.348301
	0.0119441	-0.097137	-0.0122098	-0.181261		0.0314727	0.0919661	-0.154372	0.417802
	-0.00422334	-0.0640613	0.00122448	-0.204872		0.0493227	0.0435973	-0.0770476	0.413665
	-0.0196904	0.000243761	-0.00201036	-0.240606		0.110284	-0.0106135	-0.0435257	0.360864
	-0.04149	0.0628401	-0.0543433	-0.278463		0.136606	0.01253	-0.0311347	0.316007
	-0.0773958	0.0928504	-0.159176	-0.280162		0.152209	0.0450074	0.0210994	0.297502
	-0.0967893	0.0890331	-0.16757	-0.277209		0.0961427	0.0808095	0.0587325	0.345124
	-0.0791433	0.0782425	-0.105251	-0.278568		-0.0724382	0.162811	0.0630229	0.404251
	-0.057155	0.0692402	-0.0145026	-0.217134		-0.205078	0.215744	0.081085	0.452231
	-0.0758548	0.0693661	0.0490094	-0.114387		-0.18816	0.184568	0.0563951	0.41069
	-0.103732	0.0809609	0.0520298	-0.0627075		-0.13136	0.15811	-0.0473836	0.373723
	-0.119569	0.0828603	0.0199221	-0.0475317		-0.101558	0.162388	-0.118817	0.357813
	-0.135615	0.0658043	0.00485829	-0.00541195		-0.0642538	0.110739	-0.0829847	0.300785
	-0.149413	0.0436442	0.0268823	0.0382766		-0.0600197	0.038683	-0.0390355	0.197958
	-0.155929	0.0336929	0.0455365	0.0752945		-0.1304	0.0420919	-0.0412606	0.0658595
	-0.16686	0.0198369	0.0288318	0.14827		-0.161704	0.0729939	-0.0685307	-0.073817
	-0.177809	-0.00355307	-0.00959755	0.220254		-0.11116	0.0802646	-0.150468	-0.158278
	-0.145194	-0.0147495	-0.0221112	0.217983		-0.0877957	0.133887	-0.284009	-0.130597
	-0.100337	0.00787484	0.0186865	0.187966		-0.0711119	0.230025	-0.349465	-0.054473
	-0.0855698	0.0623754	0.090753	0.189574		0.0546435	0.261835	-0.318681	-0.0423455
	-0.087833	0.121301	0.128102	0.194292		0.221651	0.2529	-0.288522	-0.107906
	-0.0723151	0.152108	0.0926748	0.184248		0.26405	0.282883	-0.245046	-0.202222
	-0.0525934	0.114815	0.0175014	0.198718		0.182618	0.295698	-0.125392	-0.278489
	-0.0457463	0.0265709	-0.0282164	0.224336		0.0298274	0.230875	0.0160473	-0.291283
	-0.038307	-0.0466588	-0.0158605	0.219314		-0.185668	0.170751	0.0908392	-0.214892
	-0.0620074	-0.0672625	0.0204221	0.201057		-0.315831	0.147796	0.127148	-0.136471
	-0.122802	-0.0439053	0.0247748	0.197947		-0.224847	0.107026	0.125984	-0.130397
	-0.174772	0.00931211	-0.0129884	0.11397		-0.051394	0.0816131	0.0469281	-0.148175
	-0.180729	0.0800733	-0.0513953	-0.0199347		0.0281837	0.111171	-0.0381011	-0.137969
	-0.196988	0.12557	-0.0473994	-0.0754017		0.0697187	0.110008	-0.0471258	-0.120048
	-0.182776	0.13379	0.0402109	-0.0473035		0.121328	0.0360576	-0.0316666	-0.113361
	-0.151622	0.115189	0.122869	-0.00145495		0.098526	0.00124046	-0.0519845	-0.0887778
	-0.131016	0.0751577	0.154415	0.0655202		0.0164028	0.0322378	-0.0559562	-0.0425497
	-0.118728	0.0177785	0.148587	0.138122		-0.0713873	0.0496713	-0.0180234	0.00933287
	-0.0923221	-0.0229835	0.14578	0.13581		-0.180736	0.0714286	0.0273023	0.0293941
	-0.0620192	-0.0293049	0.167055	0.0743561		-0.269885	0.133516	0.113801	-0.0550944
	-0.0822045	-0.0265486	0.195028	0.0362005		-0.225963	0.134204	0.243672	-0.279904
	-0.140417	-0.0191555	0.191316	0.00395678		-0.150028	0.0318709	0.309444	-0.586263
	-0.171927	-0.00146566	0.154012	-0.0555906		-0.224003	-0.0533256	0.257774	-0.722929
	-0.152862	0.0124856	0.12366	-0.0817347		-0.392345	-0.0970231	0.204269	-0.716727
	-0.0917995	0.0120639	0.14962	-0.0498907		-0.474853	-0.158937	0.194038	-0.630978
	-0.0302871	0.0225173	0.221275	-0.0120317		-0.44866	-0.178056	0.179392	-0.50943
	-0.00512499	0.0435314	0.274662	0.0343964		-0.38569	-0.0993244	0.182175	-0.376108
	-0.0350492	0.0399354	0.26216	0.137841		-0.308609	-0.0291865	0.242737	-0.282618
	-0.0671683	0.0287684	0.208187	0.239192		-0.278311	-0.0238441	0.302473	-0.248468
	-0.0567833	0.0496943	0.17461	0.272771		-0.327524	-0.00190853	0.327116	-0.254878
	-0.0297442	0.100692	0.191324	0.272325		-0.332878	0.00622026	0.372449	-0.33894
	-0.0313543	0.155715	0.223644	0.241519		-0.198	-0.0718601	0.397069	-0.487939
	-0.0575307	0.207513	0.212069	0.123447		-0.0734329	-0.162719	0.347652	-0.602276
	-0.0723436	0.231245	0.145366	-0.0241826		-0.0839168	-0.202652	0.303772	-0.622436
	-0.0750532	0.213031	0.0852554	-0.103695		-0.169835	-0.264696	0.341436	-0.592215
	-0.0607442	0.184614	0.0819715	-0.152188		-0.289302	-0.327605	0.363388	-0.55235
	-0.051598	0.166184	0.11591	-0.209408		-0.443669	-0.276381	0.294851	-0.519472
	-0.0784029	0.147076	0.118813	-0.218952		-0.533662	-0.17143	0.199485	-0.528198
	-0.12895	0.12334	0.0638869	-0.181677		-0.527235	-0.137538	0.111102	-0.577489
	-0.141606	0.11382	-0.00583269	-0.165076		-0.534512	-0.147853	0.021489	-0.608662
	-0.099606	0.100346	-0.0124824	-0.136175		-0.570287	-0.171404	-0.0179888	-0.598886
	-0.0613932	0.0679091	0.0668235	-0.0473891		-0.521131	-0.27016	0.0161683	-0.586744
	-0.0536797	0.0264711	0.174954	0.0433394		-0.434633	-0.378177	0.0454476	-0.563162
	-0.0627724	-0.0185266	0.223035	0.0979006		-0.417904	-0.373037	0.0570777	-0.506678
	-0.0566762	-0.0859081	0.178313	0.156569		-0.421119	-0.318771	0.128145	-0.45329
	-0.0228699	-0.179034	0.0975479	0.207668		-0.364069	-0.307985	0.215835	-0.421897
	0.0341499	-0.258663	0.0551075	0.21212		-0.318517	-0.285869	0.243521	-0.377766
	0.0692586	-0.297612	0.0671782	0.212113		-0.320739	-0.231824	0.240656	-0.337837
	0.0406498	-0.283411	0.0859515	0.231115		-0.32318	-0.221896	0.233906	-0.363521
	-0.00718874	-0.216007	0.0739351	0.206762		-0.363071	-0.22415	0.1479	-0.410245
	-0.021983	-0.122151	0.0384062	0.151239		-0.452971	-0.175234	0.0213354	-0.434559
	-0.0116585	-0.0558438	0.0195031	0.148873		-0.44898	-0.153233	-0.0281582	-0.487907
	-0.0201696	-0.0378147	0.0401147	0.17828		-0.318316	-0.197189	-0.0200225	-0.579695
	-0.0278098	-0.0411109	0.0775906	0.155039		-0.228302	-0.205851	-0.0315549	-0.629064
	-0.0213164	-0.0550428	0.0839737	0.103555		-0.238309	-0.155023	-0.0427805	-0.585361
	-0.00410128	-0.0762407	0.0409118	0.0677944		-0.25809	-0.141885	-0.0258569	-0.481158
	0.034325	-0.100736	-0.0213203	0.030356		-0.279977	-0.153268	-0.0193271	-0.350492
	0.0779734	-0.117019	-0.0582155	0.00308601		-0.304825	-0.134605	0.0135169	-0.244075
	0.0879599	-0.120245	-0.057605	0.0179998		-0.224196	-0.149891	0.102905	-0.204218
	0.0590481	-0.0988322	-0.0480869	0.0191463		-0.0526504	-0.232435	0.154387	-0.210515
	0.0339458	-0.0674924	-0.0664025	-0.0310207		0.0283097	-0.290201	0.0979657	-0.185402
	-0.00467751	-0.0596043	-0.106526	-0.0490833		-0.0153819	-0.324593	0.0227317	-0.112064
	-0.0721089	-0.0984171	-0.131423	0.0022857		-0.0855837	-0.396726	-0.0012805	-0.0167007
	-0.13996	-0.142346	-0.108144	0.0487988		-0.167571	-0.439403	4.32033e-05	0.108705
	-0.189018	-0.133841	-0.0619516	0.0494897		-0.235385	-0.380519	0.0551765	0.234074
	-0.230564	-0.0907005	-0.0419076	0.0402787		-0.189741	-0.312746	0.177194	0.275787
	-0.253349	-0.0534051	-0.0668726	0.0243011		-0.0631811	-0.279086	0.258912	0.245273
	-0.219013	-0.0355036	-0.0970886	-0.00542004		-0.00751568	-0.209088	0.237672	0.254037
	-0.165139	-0.0299658	-0.0905731	-0.00133247		0.00128313	-0.110875	0.190377	0.31724
	-0.138662	-0.0290549	-0.0476292	-0.00038821		0.0463567	-0.082762	0.150167	0.366991
	-0.142065	-0.0286819	-0.00746383	-0.0786084		0.0681035	-0.0896284	0.076255	0.382185
	-0.152129	-0.0426934	-0.00554603	-0.20179		0.0110157	-0.0640763	0.0374468	0.352948
	-0.156537	-0.0959928	-0.0210358	-0.266417		-0.0295078	-0.0519862	0.083578	0.278887
	-0.125519	-0.156623	-0.0351246	-0.27233		-0.0473288	-0.0623714	0.136986	0.211437
	-0.043471	-0.176641	0.0450024	-0.266007		-0.116836	-0.0164583	0.122166	0.189864
	0.0225573	-0.153548	0.123397	-0.236934		-0.181022	0.0419966	0.104638	0.154549
	0.0499139	-0.12826	0.154968	-0.208504		-0.164462	0.0119769	0.106024	0.0508762
	0.0744238	-0.122261	0.140811	-0.221881		-0.131063	-0.0429727	0.094612	-0.075279
	0.12392	-0.135212	0.116807	-0.228466		-0.119614	-0.0430233	0.115602	-0.153669
	0.161654	-0.162459	0.118605	-0.141593		-0.059775	-0.0460959	0.178299	-0.158226
	0.164699	-0.168778	0.138545	-0.051213		0.0313481	-0.0670155	0.171964	-0.100026
	0.135138	-0.143594	0.130232	-0.017682		0.0796696	-0.0227035	0.0519056	0.00161565
	0.0876614	-0.124307	0.071425	0.0223503		0.123934	0.0282448	-0.0398571	0.0888811
	0.0727665	-0.134193	0.00105597	0.115443		0.178439	-0.0104997	-0.035897	0.153161
	0.104723	-0.126714	-0.0226732	0.209706		0.149094	-0.0680746	0.0123243	0.225376
	0.14494	-0.0705945	0.0085849	0.26543		0.0446854	-0.0856822	0.0841869	0.281885
	0.143351	-0.0020494	0.0585506	0.271309		0.0235346	-0.14239	0.139356	0.260167
	0.128394	0.0514191	0.0796663	0.172512		0.0889152	-0.237342	0.102808	0.207496
	0.145702	0.0711444	0.0520568	-0.00933864		0.116376	-0.273862	0.0356512	0.218209
	0.188483	0.0393243	0.019384	-0.143724		0.1315	-0.290901	0.0910354	0.251813
	0.230298	-0.0270668	0.040434	-0.200162		0.203223	-0.34359	0.228136	0.22327
	0.250817	-0.0649082	0.108712	-0.259932		0.282749	-0.349127	0.296265	0.121453
	0.236686	-0.0632682	0.167325	-0.305102		0.323796	-0.285724	0.295239	-0.0226218
	0.178461	-0.0498758	0.174767	-0.264452		0.349499	-0.266295	0.28712	-0.139068
	0.13483	-0.0318469	0.145489	-0.171697		0.289979	-0.283662	0.268317	-0.13432
	0.149688	-0.021227	0.12764	-0.0658178		0.150739	-0.245127	0.249186	-0.0086573
	0.201266	-0.0392378	0.15094	0.054664		0.115238	-0.211309	0.274632	0.118874
	0.259115	-0.083252	0.195136	0.104097		0.263972	-0.244995	0.272093	0.176792
	0.32026	-0.125382	0.207836	0.017478		0.424056	-0.265717	0.197663	0.174631
	0.381453	-0.165078	0.166793	-0.0941212		0.486959	-0.254247	0.141863	0.11787
	0.417301	-0.199662	0.112938	-0.119319		0.496766	-0.292499	0.156074	0.00180448
	0.438633	-0.194827	0.100737	-0.112472		0.446795	-0.341608	0.145747	-0.102057
	0.437095	-0.16387	0.134344	-0.126405		0.358659	-0.323778	0.102134	-0.116438
	0.396786	-0.0935097	0.165778	-0.137974		0.355959	-0.3314	0.113204	-0.0456917
	0.328291	-0.0397498	0.150335	-0.145747		0.4332	-0.347887	0.149282	0.0728851
	0.293587	-0.0135045	0.101145	-0.158358		0.443315	-0.347956	0.155286	0.162613
	0.309739	-0.0218729	0.0753048	-0.126371		0.396077	-0.331746	0.158589	0.177048
	0.343332	-0.0534137	0.107569	-0.0625802		0.428775	-0.374159	0.14318	0.0933661
	0.378598	-0.0833772	0.158536	-0.0640681		0.515171	-0.414637	0.0348209	-0.0269412
	0.405127	-0.110815	0.157703	-0.129263		0.574519	-0.379619	-0.109604	-0.0985113
	0.418434	-0.152688	0.080248	-0.148708		0.648278	-0.34497	-0.185614	-0.124697
	0.434351	-0.1897	-0.0169518	-0.10945		0.727843	-0.351801	-0.212488	-0.149253
	0.488761	-0.186097	-0.0636885	-0.0776393		0.722846	-0.327488	-0.211457	-0.194045
	0.545173	-0.165836	-0.0391481	-0.0546282		0.679649	-0.286494	-0.136603	-0.267381
	0.55413	-0.159514	0.00730686	-0.049532		0.651649	-0.310862	-0.0151702	-0.345441
	0.548012	-0.173067	0.0305031	-0.0981883		0.53246	-0.344961	0.0761297	-0.374889
	0.555227	-0.188317	0.0343984	-0.158279		0.310814	-0.322164	0.172311	-0.370247
	0.554005	-0.193496	0.0701078	-0.168753		0.157406	-0.314913	0.313525	-0.390448
	0.52202	-0.167147	0.158726	-0.18363		0.135712	-0.362702	0.404174	-0.448049
	0.485244	-0.0973752	0.264878	-0.246458		0.133033	-0.380648	0.375129	-0.504267
	0.442593	-0.0214307	0.328139	-0.285541		0.147422	-0.358751	0.296094	-0.550224
	0.411062	0.0172792	0.318902	-0.262994		0.231696	-0.350164	0.225396	-0.636621
	0.424496	0.013934	0.277128	-0.23133		0.348919	-0.295506	0.140431	-0.769692
	0.456463	-0.00920741	0.245609	-0.205055		0.467649	-0.173235	0.0790898	-0.918065
	0.456039	-0.0491846	0.240209	-0.174036		0.629546	-0.113461	0.0452583	-1.03536
	0.425332	-0.0907141	0.239594	-0.174458		0.753224	-0.167586	-0.0215935	-1.05484
	0.419465	-0.109955	0.226392	-0.199509		0.709515	-0.224554	-0.10319	-0.922137
	0.428089	-0.114796	0.208014	-0.156188		0.57882	-0.275033	-0.0910206	-0.703003
	0.434681	-0.112316	0.198167	-0.0374386		0.497831	-0.363377	-0.000646095	-0.507267
	0.433994	-0.0972139	0.255716	0.0709342		0.464998	-0.416132	0.0511853	-0.358082
	0.412526	-0.0836329	0.323145	0.138571		0.469679	-0.390024	0.0522619	-0.272202
	0.365096	-0.108565	0.350153	0.183312		0.536447	-0.367723	0.0418362	-0.267898
	0.34355	-0.154874	0.313708	0.160186		0.577121	-0.362103	0.020297	-0.294693
	0.39283	-0.186174	0.2442	0.0673792		0.51768	-0.289085	0.0170387	-0.263937
	0.453817	-0.195757	0.202016	-0.0113784		0.494908	-0.207159	0.082711	-0.185224
	0.476861	-0.194714	0.216611	-0.0613957		0.582344	-0.218421	0.132934	-0.108627
	0.459399	-0.19814	0.25908	-0.126864		0.656104	-0.262789	0.0605713	-0.0391654
	0.415535	-0.223132	0.267269	-0.172641		0.638803	-0.280465	-0.0528908	-0.000874661
	0.368906	-0.275902	0.236345	-0.158081		0.602655	-0.325687	-0.0867984	-0.0406092
	0.376736	-0.309421	0.210887	-0.191558		0.560753	-0.37952	-0.0545167	-0.112593
	0.455242	-0.299846	0.227959	-0.258976		0.484956	-0.358279	-0.0143946	-0.117224
	0.533558	-0.280213	0.260664	-0.330502		0.454481	-0.340481	0.0104217	-0.0592366
	0.56131	-0.29194	0.27001	-0.388753		0.47377	-0.404537	-0.048959	-0.00335933
	0.530096	-0.33115	0.240945	-0.4452		0.436881	-0.446577	-0.188387	0.0395822
	0.46051	-0.383679	0.199874	-0.451231		0.342235	-0.411533	-0.230434	0.0380245
	0.372717	-0.434066	0.191728	-0.394999		0.320508	-0.393674	-0.108387	-0.036722
	0.311406	-0.433787	0.223152	-0.369815		0.36966	-0.407081	0.0248103	-0.115722
	0.295878	-0.374927	0.254388	-0.405429		0.429211	-0.394475	0.0351927	-0.122488
	0.293083	-0.309612	0.257154	-0.406946		0.530389	-0.425416	-0.0156382	-0.120879
	0.291899	-0.276799	0.255654	-0.359314		0.64449	-0.528808	-0.0646862	-0.104021
	0.307625	-0.273984	0.283741	-0.341083		0.651415	-0.637431	-0.0765941	-0.0572093
	0.345518	-0.29732	0.351175	-0.35884		0.59394	-0.626112	-0.019534	0.00162923
	0.37312	-0.328847	0.441859	-0.381442		0.617322	-0.629971	0.0494482	0.0116012
	0.406639	-0.33511	0.517231	-0.431064		0.677889	-0.663066	0.0166924	-0.0305666
	0.458346	-0.320939	0.548843	-0.469641		0.676698	-0.674806	-0.0758957	-0.111236
	0.503044	-0.303866	0.549908	-0.431949		0.676311	-0.725512	-0.0923732	-0.224852
	0.523893	-0.286152	0.552093	-0.364942		0.711018	-0.812816	-0.0649021	-0.298649
	0.525553	-0.260647	0.558644	-0.343427		0.728053	-0.831324	-0.0787189	-0.285972
	0.503696	-0.25709	0.523706	-0.323306		0.757343	-0.801097	-0.103249	-0.236063
	0.45319	-0.30294	0.482135	-0.274848		0.828021	-0.822824	-0.114465	-0.215987
	0.42196	-0.377702	0.420182	-0.251737		0.805614	-0.836492	-0.14763	-0.18958
	0.427471	-0.441247	0.370729	-0.252839		0.650996	-0.762485	-0.149431	-0.134618
	0.445615	-0.471905	0.357533	-0.235353		0.542953	-0.688089	-0.0576056	-0.0773983
	0.465459	-0.475204	0.374509	-0.226037		0.566232	-0.672987	0.0278985	-0.00165983
	0.500837	-0.456499	0.382031	-0.244152		0.635554	-0.666288	0.0457257	0.133963
	0.536329	-0.437076	0.366233	-0.223123		0.731479	-0.675185	0.088745	0.275848
	0.535772	-0.412909	0.348834	-0.165495		0.864099	-0.731383	0.194357	0.333817
	0.52191	-0.364783	0.365178	-0.193785		0.921652	-0.748334	0.274461	0.301375
	0.507585	-0.308222	0.415246	-0.270334		0.883177	-0.686538	0.294879	0.21403
	0.488744	-0.288778	0.469349	-0.381312		0.879308	-0.652272	0.259465	0.121396
	0.481336	-0.315136	0.495186	-0.434		0.923913	-0.675683	0.124821	0.100816
	0.523689	-0.353642	0.488329	-0.462281		0.89796	-0.672857	-0.027828	0.152307
	0.587659	-0.384003	0.471034	-0.418605		0.836651	-0.652194	-0.0678237	0.184831
	0.622741	-0.387843	0.460348	-0.307755		0.8068	-0.682939	-0.0312426	0.129312
	0.635885	-0.361174	0.453563	-0.201624		0.760005	-0.71318	-0.0444847	0.0254194
	0.615144	-0.322491	0.433551	-0.102669		0.699737	-0.696817	-0.0704443	-0.080492
	0.55514	-0.297764	0.406596	0.00403246		0.715164	-0.698116	-0.039184	-0.152236
	0.489658	-0.289774	0.403349	0.0496958		0.748693	-0.708088	0.00642078	-0.155642
	0.463174	-0.280145	0.440827	-0.00116738		0.695216	-0.641908	0.0209632	-0.101002
	0.449137	-0.284087	0.503112	-0.0611342		0.636905	-0.545264	0.00719502	-0.043369
	0.446858	-0.317076	0.549763	-0.0827379		0.663128	-0.528682	-0.0596288	-0.00940373
	0.499209	-0.361439	0.551622	-0.0957274		0.698301	-0.542724	-0.164062	0.0691844
	0.596505	-0.385621	0.53453	-0.0966657		0.721723	-0.532316	-0.182791	0.197684
	0.682026	-0.384991	0.528724	-0.0554368		0.811213	-0.553178	-0.0987262	0.285554
	0.721991	-0.351357	0.555218	-0.0416106		0.935591	-0.609518	-0.0583855	0.282723
	0.730652	-0.29503	0.586132	-0.068216		0.998081	-0.6439	-0.112298	0.222977
	0.70506	-0.294469	0.589897	-0.0583884		1.04238	-0.70398	-0.147884	0.127783
	0.673345	-0.314773	0.558992	-0.00677026		1.08906	-0.819918	-0.0913445	0.0305739
	0.671979	-0.356528	0.527953	0.00490657		1.06646	-0.868138	0.0229369	-0.0287688
	0.683898	-0.380899	0.527813	-0.0330728		1.0081	-0.804809	0.160491	-0.0725413
	0.680471	-0.390233	0.569357	-0.0801034		1.02111	-0.752388	0.239997	-0.132721
	0.680463	-0.375248	0.620116	-0.146539		1.05604	-0.746582	0.177759	-0.139167
	0.714502	-0.342263	0.646214	-0.191006		1.00336	-0.703666	0.056195	-0.0155382
	0.743004	-0.316208	0.639175	-0.137052		0.928551	-0.660645	0.046854	0.193885
	0.760183	-0.292535	0.622855	-0.0516413		0.874044	-0.689809	0.151931	0.360532
	0.782259	-0.257078	0.615891	-0.0571305		0.783858	-0.721101	0.252071	0.415905
	0.799733	-0.220104	0.616391	-0.112778		0.665437	-0.726836	0.321421	0.349701
	0.796113	-0.219336	0.615485	-0.115579		0.600618	-0.772026	0.329634	0.215257
	0.786644	-0.233519	0.60921	-0.078084		0.556721	-0.813992	0.246132	0.11742
	0.789835	-0.236594	0.608075	-0.0413899		0.48543	-0.77012	0.16041	0.0934323
	0.791487	-0.237198	0.628057	-0.00648626		0.4587	-0.737346	0.203841	0.175459
	0.810607	-0.246225	0.668738	-0.0192665		0.493624	-0.800949	0.301004	0.205653
	0.851264	-0.263406	0.704225	-0.0920991		0.518468	-0.85688	0.35837	0.193351
	0.891446	-0.296407	0.705906	-0.131738		0.569462	-0.860231	0.38546	0.184607
	0.90161	-0.36863	0.678062	-0.0963464		0.724075	-0.868158	0.42272	0.205562
	0.908294	-0.405995	0.644247	-0.0804721		0.881396	-0.849004	0.416279	0.278616
	0.940828	-0.40309	0.619447	-0.113097		0.916852	-0.76781	0.365115	0.376055
	0.968554	-0.388544	0.601175	-0.134007		0.918237	-0.754646	0.317678	0.413122
	0.958339	-0.378403	0.579169	-0.152897		0.952451	-0.858037	0.234753	0.400945
	0.901474	-0.357621	0.554101	-0.199453		0.959778	-0.950819	0.122862	0.395988
	0.832055	-0.329736	0.538136	-0.212923		0.942339	-0.990539	0.107847	0.393058
	0.782888	-0.304424	0.549344	-0.174321		0.939621	-1.04026	0.20743	0.356578
	0.795172	-0.279369	0.576923	-0.146551		0.864298	-1.06625	0.296575	0.311555
	0.853308	-0.27511	0.598586	-0.111431		0.71466	-1.03653	0.312215	0.283565
	0.889728	-0.289573	0.594847	-0.0224775		0.654646	-1.0495	0.288875	0.257148
	0.89638	-0.284136	0.577521	0.0450485		0.710962	-1.10685	0.22038	0.237426
	0.915929	-0.223225	0.562989	0.0128093		0.777674	-1.09012	0.151878	0.251808
	0.96018	-0.128786	0.561378	-0.0621582		0.854141	-1.01462	0.169269	0.261724
	0.990479	-0.0448995	0.562891	-0.124533		0.962411	-0.978782	0.212027	0.215639
	1.00792	0.0064025	0.562117	-0.177851		0.968485	-0.951361	0.152041	0.145367
	1.01159	0.010889	0.566382	-0.185235		0.830774	-0.89529	0.0216538	0.108349
	0.99832	-0.0332206	0.595405	-0.12589		0.685467	-0.886286	-0.056667	0.080544
	0.997061	-0.104609	0.652546	-0.0813969		0.591741	-0.908465	-0.096136	0.0634245
	1.03792	-0.164933	0.706691	-0.0957809		0.50882	-0.874665	-0.121237	0.0548838
	1.09355	-0.212904	0.707752	-0.103933		0.494095	-0.835138	-0.106533	-0.00294304
	1.10759	-0.255187	0.639416	-0.079826		0.567451	-0.868653	-0.0772261	-0.115145
	1.09745	-0.277453	0.539948	-0.0839095		0.601639	-0.891003	-0.0747761	-0.1615
	1.07482	-0.277715	0.468185	-0.112689		0.577677	-0.838449	-0.0229288	-0.0967279
	1.03953	-0.263302	0.45268	-0.131161		0.618664	-0.803024	0.106188	1.64152e-06
	1.00167	-0.237248	0.480852	-0.163676		0.698467	-0.82109	0.174267	0.0817875
	0.978225	-0.202223	0.512101	-0.218886		0.715976	-0.843361	0.11129	0.153605
	0.946605	-0.181826	0.521763	-0.23807		0.73695	-0.882734	0.014351	0.227113
	0.907062	-0.167468	0.527721	-0.234128		0.816573	-0.952659	-0.0427744	0.323749
	0.906773	-0.138363	0.560976	-0.263366		0.83573	-0.955552	-0.0513772	0.440607
	0.920065	-0.0959879	0.613842	-0.283332		0.773021	-0.886896	0.0210931	0.471374
	0.894648	-0.0642107	0.644168	-0.224906		0.73629	-0.857213	0.116197	0.341376
	0.835159	-0.0552579	0.632995	-0.125677		0.734642	-0.882734	0.100058	0.129797
	0.784052	-0.0531739	0.599916	-0.0304101		0.722249	-0.863884	0.0173869	-0.0119455
	0.742155	-0.0593871	0.593787	0.0770297		0.767421	-0.82432	0.0230134	-0.0419557
	0.715549	-0.0700622	0.631668	0.157157		0.853244	-0.830444	0.111354	-0.00594789
	0.710827	-0.0769383	0.687454	0.154828		0.839991	-0.826301	0.154465	0.0681273
	0.678161	-0.083408	0.709282	0.121091		0.736078	-0.793876	0.139297	0.152627
	0.607852	-0.120717	0.688953	0.107917		0.657126	-0.803275	0.0931265	0.230112
	0.551845	-0.185446	0.654205	0.0642313		0.600915	-0.822795	0.0196606	0.348733
	0.560652	-0.243029	0.638321	-0.0077345		0.527165	-0.772906	-0.0257921	0.47765
	0.59623	-0.28733	0.654244	-0.0167339		0.527712	-0.719488	0.0288207	0.480775
	0.625469	-0.312512	0.691671	0.0425698		0.596175	-0.736199	0.0344663	0.311829
	0.647578	-0.310721	0.714291	0.0945995		0.600491	-0.742747	-0.0873969	0.11286
	0.656044	-0.296778	0.701749	0.13471		0.53021	-0.710504	-0.197379	0.0195487
	0.660133	-0.302187	0.677969	0.171046		0.481441	-0.70743	-0.196774	0.0990802
	0.675596	-0.322585	0.684948	0.167707		0.449534	-0.702811	-0.147367	0.297226
	0.694407	-0.356128	0.728715	0.161792		0.423673	-0.640461	-0.103809	0.473829
	0.655094	-0.413781	0.778346	0.244555		0.480946	-0.650712	-0.0660267	0.518705
	0.563626	-0.462443	0.7943	0.357221		0.580423	-0.712682	-0.0826719	0.471836
	0.472139	-0.459105	0.773527	0.383786		0.58794	-0.735954	-0.146381	0.446174
	0.412919	-0.401853	0.748426	0.342169		0.544157	-0.710785	-0.14623	0.451436
	0.40215	-0.339273	0.759209	0.296831		0.565906	-0.723102	-0.106167	0.414876
	0.442164	-0.29995	0.789532	0.239146		0.632729	-0.736952	-0.155843	0.300005
	0.493575	-0.300894	0.801877	0.206871		0.679465	-0.686653	-0.272589	0.161267
	0.49604	-0.352562	0.78772	0.246207		0.735259	-0.657484	-0.32008	0.0317609
	0.466984	-0.429082	0.764968	0.272321		0.752996	-0.678994	-0.258554	-0.0470552
	0.446467	-0.486	0.754688	0.210751		0.664746	-0.653752	-0.122031	-0.0475469
	0.446773	-0.514992	0.751674	0.144196		0.558711	-0.609596	0.0503572	-0.0336127
	0.45347	-0.534996	0.741211	0.142956		0.559163	-0.649491	0.112482	-0.0626665
	0.464334	-0.52892	0.704065	0.169218		0.612431	-0.71554	-0.0249123	-0.0644135
	0.487628	-0.506345	0.651594	0.217129		0.641551	-0.721771	-0.204877	0.0240636
	0.508432	-0.500605	0.611891	0.291136		0.701622	-0.734363	-0.216155	0.173037
	0.529078	-0.506663	0.611352	0.312018		0.779045	-0.775402	-0.0938044	0.347388
	0.54131	-0.494509	0.639202	0.249091		0.806555	-0.777806	0.0145128	0.516233
	0.529712	-0.459312	0.678651	0.199107		0.851396	-0.79231	0.0663002	0.622415
	0.482637	-0.420851	0.712246	0.199923		0.978048	-0.882987	0.0490478	0.673155
	0.442439	-0.385576	0.724182	0.192597		1.05644	-0.952001	-0.0238254	0.696215
	0.423016	-0.380877	0.699347	0.185744		1.02762	-0.920875	-0.054978	0.686645
	0.390801	-0.412462	0.6394	0.217247		1.02784	-0.873418	-0.00707119	0.616921
	0.344213	-0.440134	0.566411	0.232209		1.10036	-0.834665	-0.00548244	0.537416
	0.335011	-0.435634	0.518105	0.215551		1.15222	-0.754399	-0.058885	0.514607
	0.395717	-0.422889	0.514181	0.244221		1.16696	-0.699903	-0.0383933	0.558637
	0.506493	-0.429603	0.547134	0.313371		1.11307	-0.732913	0.0655686	0.604768
	0.637761	-0.447911	0.592799	0.33345		0.915508	-0.763143	0.149064	0.61225
	0.713826	-0.472192	0.628614	0.324976		0.676522	-0.737273	0.186393	0.564503
	0.684458	-0.498526	0.636942	0.346446		0.598568	-0.735624	0.182898	0.460003
	0.595533	-0.516288	0.623045	0.37411		0.65549	-0.745784	0.115708	0.395065
	0.52376	-0.5152	0.600888	0.384705		0.703106	-0.706101	0.0642734	0.449431
	0.484225	-0.526697	0.571327	0.398973		0.748234	-0.686722	0.123909	0.558492
	0.437868	-0.564912	0.53033	0.378437		0.827958	-0.755355	0.206873	0.614537
	0.385155	-0.594231	0.487784	0.293066		0.865153	-0.817779	0.163968	0.612769
	0.321668	-0.588207	0.458829	0.218082		0.882423	-0.817372	0.00907296	0.595799
	0.258928	-0.555458	0.449688	0.200999		0.956966	-0.822012	-0.130762	0.630239
	0.239664	-0.526159	0.465853	0.181063		0.985425	-0.836912	-0.204603	0.779486
	0.273921	-0.51456	0.487669	0.142252		0.848823	-0.826187	-0.146701	0.993664
	0.302188	-0.524327	0.489958	0.151937		0.690822	-0.853061	0.0329973	1.1214
	0.283669	-0.531317	0.465581	0.212349		0.66315	-0.941738	0.18846	1.09316
	0.261114	-0.52055	0.443549	0.272915		0.711603	-0.9691	0.211436	0.986597
	0.234217	-0.493936	0.437147	0.331898		0.773806	-0.900481	0.193917	0.91125
	0.186028	-0.45227	0.437794	0.381525		0.796073	-0.84682	0.201745	0.884604
	0.128935	-0.396205	0.426445	0.36512		0.674809	-0.816329	0.159203	0.88643
	0.0942138	-0.331118	0.395161	0.311946		0.453784	-0.758488	0.0665942	0.897989
	0.0899561	-0.280081	0.35562	0.312876		0.355693	-0.7323	-0.00658294	0.906457
	0.14113	-0.246512	0.339951	0.343179		0.388661	-0.769646	-0.0400187	0.904311
	0.254952	-0.218843	0.364733	0.315696		0.370187	-0.775174	-0.0308391	0.938164
	0.34488	-0.19595	0.408174	0.250886		0.292467	-0.75387	0.0597929	0.964643
	0.343641	-0.18984	0.438727	0.198383		0.270903	-0.805588	0.139562	0.9095
	0.272722	-0.188331	0.449324	0.156787		0.296085	-0.884119	0.0642877	0.831444
	0.209453	-0.172271	0.446201	0.145325		0.323922	-0.899559	-0.108733	0.821371
	0.181494	-0.164343	0.447595	0.186864		0.402662	-0.904161	-0.201434	0.855492
	0.203871	-0.174075	0.460632	0.204089		0.51955	-0.948527	-0.18092	0.88426
	0.277115	-0.19381	0.471259	0.156583		0.58936	-0.968507	-0.147637	0.894554
	0.353473	-0.216729	0.458826	0.135956		0.657568	-0.986358	-0.14568	0.851061
	0.409749	-0.256849	0.437648	0.197302		0.789111	-1.06284	-0.197342	0.751075
	0.455821	-0.229715	0.43336	0.258674		0.907279	-1.11079	-0.289439	0.640589
	0.500678	-0.180546	0.446247	0.278368		0.92256	-1.048	-0.289732	0.529866
	0.507527	-0.155712	0.462498	0.296244		0.894991	-0.97539	-0.141761	0.407319
	0.490903	-0.155835	0.465944	0.303454		0.842229	-0.955511	-0.0276675	0.342685
	0.486146	-0.167938	0.457569	0.288701		0.744116	-0.91248	-0.0968661	0.424609
	0.481204	-0.184864	0.457715	0.305772		0.68401	-0.869363	-0.225655	0.623982
	0.458155	-0.209233	0.500226	0.342902		0.726452	-0.907739	-0.291754	0.82593
	0.412686	-0.222938	0.573821	0.30844		0.782115	-0.970239	-0.298981	0.975767
	0.343642	-0.218389	0.63627	0.22213		0.803037	-0.999303	-0.27445	1.04716
	0.246319	-0.207596	0.659477	0.1683		0.892732	-1.06706	-0.275547	1.00572
	0.184059	-0.196021	0.651866	0.120297		1.0329	-1.14544	-0.386477	0.907168
	0.204122	-0.192559	0.624555	0.0424478		1.10412	-1.13172	-0.534125	0.862425
	0.289154	-0.215586	0.586906	-0.0164674		1.12835	-1.06089	-0.529764	0.831948
	0.379432	-0.268047	0.548897	-0.0535627		1.17838	-1.02463	-0.382951	0.756658
	0.438389	-0.308231	0.518163	-0.0986736		1.20748	-0.983487	-0.26393	0.659991
	0.467401	-0.320276	0.500673	-0.0887432		1.20403	-0.917521	-0.244696	0.580185
	0.471641	-0.316017	0.508279	0.0221253		1.23768	-0.917521	-0.261974	0.535405
	0.486399	-0.294384	0.533705	0.132162		1.23283	-0.956812	-0.274694	0.581451
	0.509695	-0.256913	0.549609	0.16142		1.08029	-0.922542	-0.224437	0.657256
	0.494814	-0.230685	0.532713	0.140889		0.903569	-0.864447	-0.0684959	0.632605
	0.418855	-0.230717	0.487758	0.0907116		0.834431	-0.863624	0.0447119	0.496645
	0.350444	-0.230174	0.433669	-0.00239432		0.825325	-0.860658	-0.0084273	0.362516
	0.345638	-0.222565	0.402509	-0.0646645		0.858035	-0.824113	-0.129505	0.341346
	0.378875	-0.211329	0.404136	-0.0358019		0.997014	-0.838024	-0.151825	0.448055
	0.418578	-0.194641	0.41718	0.0331283		1.14198	-0.885656	-0.124237	0.616587
	0.428964	-0.17177	0.415392	0.106149		1.19085	-0.900043	-0.123347	0.74068
	0.387669	-0.156502	0.400563	0.219922		1.22938	-0.936615	-0.132281	0.784325
	0.324818	-0.152176	0.400185	0.329517		1.30698	-1.0245	-0.177121	0.823159
	0.308049	-0.144303	0.432967	0.35015		1.30249	-1.05244	-0.248451	0.933406
	0.329832	-0.129215	0.486529	0.321115		1.21531	-0.999174	-0.252853	1.05592
	0.337701	-0.138977	0.51891	0.307076		1.15505	-0.980191	-0.196025	1.06043
	0.334417	-0.168488	0.518068	0.289677		1.10879	-1.00676	-0.203182	0.9672
	0.341185	-0.199253	0.505269	0.276686		1.04695	-1.0187	-0.254661	0.898541
	0.362691	-0.233887	0.512327	0.307042		1.04359	-1.05345	-0.239457	0.886147
	0.384547	-0.260308	0.547476	0.318174		1.06371	-1.11791	-0.163874	0.893461
	0.412654	-0.257942	0.600811	0.239714		0.966116	-1.11894	-0.0966498	0.862254
	0.409174	-0.249384	0.643436	0.144469		0.80785	-1.05758	-0.0446107	0.73936
	0.356789	-0.254613	0.66093	0.119945		0.745105	-1.03319	-0.030089	0.549561
	0.297905	-0.263481	0.667938	0.148521		0.753352	-1.01882	-0.0906405	0.42426
	0.271321	-0.254714	0.684212	0.200584		0.746907	-0.956447	-0.110403	0.405588
	0.265329	-0.237188	0.703051	0.254013		0.750335	-0.923985	0.00697163	0.462738
	0.270968	-0.218666	0.703005	0.25137		0.784286	-0.981077	0.129723	0.536702
	0.315541	-0.250748	0.674688	0.190915		0.764855	-1.04942	0.100399	0.605416
	0.37202	-0.231654	0.62836	0.184143		0.782757	-1.11024	-0.0211144	0.667559
	0.419032	-0.208534	0.596766	0.256933		0.896602	-1.21262	-0.135592	0.745844
	0.464194	-0.175087	0.602782	0.30527		0.971782	-1.27988	-0.216438	0.869165
	0.499156	-0.135398	0.622967	0.288294		0.923758	-1.24991	-0.215425	1.02933
	0.492813	-0.114647	0.625625	0.263608		0.842143	-1.22582	-0.162017	1.13919
	0.466089	-0.114411	0.606053	0.223541		0.764024	-1.26906	-0.173601	1.1394
	0.474146	-0.121681	0.589251	0.160745		0.632482	-1.28172	-0.245803	1.09412
	0.504763	-0.139762	0.588516	0.143835		0.501647	-1.25183	-0.227637	1.03193
	0.539229	-0.171824	0.591783	0.182679		0.449939	-1.25278	-0.091729	0.939393
	0.565779	-0.187906	0.578199	0.199825		0.47297	-1.24988	0.0385092	0.88321
	0.571117	-0.166359	0.529623	0.197134		0.542806	-1.20585	0.103883	0.932318
	0.53333	-0.133445	0.500184	0.226026		0.695508	-1.20077	0.111739	1.04836
	0.479798	-0.0960867	0.499396	0.242508		0.877746	-1.24032	0.0702362	1.17102
	0.46133	-0.0535337	0.533256	0.204341		0.971095	-1.2188	0.0248698	1.23355
	0.467499	-0.0238831	0.573137	0.152705		0.992978	-1.16536	0.0724195	1.16515
	0.483716	-0.0191665	0.603574	0.0980671		1.01908	-1.17959	0.16308	1.01263
	0.502836	-0.019788	0.619113	0.0148805		1.01878	-1.20845	0.174799	0.925921
	0.519096	-0.0210379	0.620669	-0.0471704		0.971454	-1.1962	0.154508	0.967739
	0.510477	-0.0404051	0.61001	-0.0509453		0.96106	-1.21848	0.209516	1.06854
	0.506641	-0.0584429	0.584265	-0.0831689		0.967472	-1.28575	0.313034	1.13083
	0.533347	-0.0571997	0.542499	-0.184351		0.91924	-1.30085	0.396711	1.1498
	0.564364	-0.0515076	0.500027	-0.24738		0.897137	-1.29704	0.460231	1.10523
	0.591079	-0.0599954	0.475912	-0.22673		0.966759	-1.33049	0.449467	0.990869
	0.628686	-0.0667207	0.471188	-0.198835		1.02783	-1.3154	0.358725	0.863103
	0.665167	-0.0636292	0.460089	-0.191883		1.02446	-1.2209	0.339731	0.792395
	0.648227	-0.0643915	0.431816	-0.183572		1.03893	-1.16573	0.474984	0.754195
	0.5924	-0.0694762	0.391323	-0.205065		1.06482	-1.17255	0.627484	0.767868
	0.545151	-0.0825389	0.358566	-0.228957		1.04325	-1.16885	0.672476	0.873984
	0.536573	-0.110151	0.341137	-0.178147		1.04695	-1.21791	0.658197	0.977568
	0.573892	-0.130561	0.320324	-0.0824065		1.0837	-1.36298	0.622156	0.994016
	0.642795	-0.0951532	0.326972	-0.0356903		1.02927	-1.48658	0.56755	0.975379
	0.704516	-0.0197847	0.330215	-0.0181653		0.878098	-1.52544	0.539607	0.968401
	0.708651	0.0371925	0.338223	0.00185665		0.789438	-1.5572	0.534905	0.980138
	0.681811	0.0467256	0.354213	-0.0266546		0.772409	-1.57493	0.46497	1.03604
	0.662259	0.0131523	0.358193	-0.0981438		0.752065	-1.5337	0.362188	1.07297
	0.64708	-0.0420503	0.328805	-0.134857		0.788936	-1.52391	0.365075	0.986277
	0.618856	-0.0839412	0.287288	-0.141654		0.906508	-1.58655	0.424924	0.804863
	0.597609	-0.079098	0.274788	-0.166908		0.999476	-1.61216	0.412897	0.648821
	0.592809	-0.0508977	0.308462	-0.173972		1.09445	-1.58244	0.333519	0.58163
	0.585833	-0.028616	0.361014	-0.129608		1.27003	-1.59489	0.227848	0.57938
	0.604849	-0.01475	0.392504	-0.0900467		1.39987	-1.62545	0.0977133	0.613348
	0.646243	-0.00163037	0.378737	-0.0769646		1.37475	-1.6052	0.0492124	0.672633
	0.666758	-0.0165488	0.328098	-0.0547771		1.31343	-1.59661	0.15153	0.733568
	0.64733	-0.00570788	0.277163	-0.0420431		1.2938	-1.62679	0.251439	0.817075
	0.628696	0.0149748	0.261567	-0.0601434		1.2652	-1.62013	0.214371	0.955329
	0.60377	0.0506855	0.280605	-0.0543376		1.28565	-1.58357	0.111202	1.089
	0.550788	0.100196	0.313293	-0.0287567		1.41768	-1.59463	0.0483904	1.09457
	0.503619	0.157465	0.343895	-0.081456		1.52941	-1.60452	0.0340757	1.01881
	0.484556	0.205744	0.366281	-0.193269		1.53602	-1.56401	0.0891015	0.965404
	0.494514	0.214759	0.380048	-0.240917		1.56013	-1.55738	0.19578	0.965514
	0.536257	0.189137	0.398572	-0.197764		1.63691	-1.615	0.254348	1.00254
	0.620519	0.163523	0.417809	-0.133225		1.66879	-1.64713	0.246743	1.03308
	0.69093	0.134114	0.423891	-0.0836108		1.67311	-1.64166	0.270275	0.972105
	0.698643	0.0840513	0.412295	-0.0894435		1.69652	-1.66636	0.331185	0.850484
	0.6735	0.017553	0.400995	-0.173009		1.64852	-1.67499	0.315626	0.805188
	0.65453	-0.0335429	0.396072	-0.25058		1.54425	-1.62731	0.228558	0.859168
	0.649987	-0.0490356	0.397224	-0.220282		1.53786	-1.60079	0.145411	0.925523
	0.655057	-0.0228398	0.391057	-0.13955		1.61626	-1.62391	0.0687996	0.958703
	0.667645	0.0255199	0.365385	-0.109048		1.61835	-1.62566	0.0227634	0.98429
	0.637039	0.048064	0.316315	-0.111037		1.56804	-1.63734	0.0639865	1.02633
	0.56617	0.0340887	0.29062	-0.106599		1.53574	-1.72951	0.127036	1.06641
	0.515302	0.0201043	0.292825	-0.123705		1.48287	-1.81303	0.0974085	1.09576
	0.500239	0.0354347	0.290448	-0.151356		1.41952	-1.80274	0.117391	1.09084
	0.486989	0.0565698	0.256195	-0.150622		1.43701	-1.76344	0.213234	1.02169
	0.468652	0.0790802	0.197967	-0.158675		1.49054	-1.72143	0.30975	0.922984
	0.471439	0.113954	0.160044	-0.183697		1.48568	-1.61646	0.339825	0.861894
	0.476823	0.156298	0.179043	-0.140581		1.47996	-1.49851	0.343776	0.814251
	0.490435	0.203497	0.25319	-0.0346419		1.50792	-1.45471	0.33283	0.723676
	0.515071	0.262572	0.337736	0.0245525		1.48033	-1.42826	0.293504	0.637209
	0.529109	0.312549	0.389293	0.0177296		1.37943	-1.38558	0.287543	0.573419
	0.502875	0.304373	0.402606	-0.0112307		1.31834	-1.40886	0.312172	0.523749
	0.456095	0.248673	0.402068	-0.0758688		1.30319	-1.49419	0.275041	0.508982
	0.425018	0.180365	0.40146	-0.183491		1.25826	-1.52595	0.171897	0.531791
	0.399515	0.105315	0.394859	-0.192535		1.22874	-1.52089	0.131516	0.500911
	0.385626	0.030081	0.372511	-0.158644		1.24883	-1.54474	0.183541	0.386798
	0.401867	-0.0114944	0.345151	-0.179958		1.22639	-1.5423	0.259869	0.22982
	0.453461	-0.00482846	0.333583	-0.226179		1.15327	-1.51171	0.354218	0.101183
	0.518102	0.0214047	0.350702	-0.21704		1.16021	-1.56029	0.445837	0.0542323
	0.599297	0.052415	0.359567	-0.196418		1.24858	-1.67358	0.456423	0.126972
	0.681143	0.0633531	0.323832	-0.20888		1.30453	-1.73196	0.400893	0.311338
	0.698778	0.0267767	0.248903	-0.226098		1.33028	-1.76438	0.386773	0.536183
	0.64511	-0.0328177	0.184129	-0.247695		1.3219	-1.82616	0.387647	0.725282
	0.580327	-0.0508529	0.166489	-0.286985		1.23506	-1.84956	0.347418	0.877761
	0.571804	-0.0198443	0.199513	-0.267006		1.142	-1.82429	0.328032	0.979727
	0.621059	0.0133372	0.241434	-0.162282		1.17894	-1.82892	0.366148	0.977068
	0.698492	0.0495232	0.254793	-0.0885468		1.27364	-1.82595	0.404009	0.907118
	0.744712	0.0666291	0.240573	-0.0916456		1.31517	-1.75655	0.426697	0.848602
	0.722833	0.0547925	0.22433	-0.0834503		1.37367	-1.72504	0.477776	0.793297
	0.677684	0.0396748	0.221721	-0.0420477		1.4818	-1.79195	0.500073	0.738921
	0.67	0.0534472	0.216816	-0.0186596		1.49259	-1.84907	0.444937	0.725333
	0.697472	0.0691761	0.193385	-0.018966		1.36745	-1.85271	0.376318	0.725003
	0.689959	0.0645799	0.169531	-0.0599418		1.21337	-1.86546	0.337619	0.697265
	0.643866	0.0658301	0.190381	-0.173515		1.05475	-1.86072	0.28638	0.674811
	0.597356	0.0933117	0.26577	-0.272855		0.936804	-1.79979	0.240315	0.657991
	0.571046	0.135488	0.344851	-0.255265		0.99834	-1.77489	0.26257	0.580174
	0.565765	0.165936	0.364611	-0.181055		1.18651	-1.80589	0.285358	0.453714
	0.584856	0.164918	0.310463	-0.156286		1.2802	-1.79757	0.252328	0.328688
	0.603955	0.120838	0.218771	-0.169579		1.27579	-1.76184	0.222398	0.246996
	0.602166	0.0420874	0.149362	-0.172601		1.30279	-1.79048	0.217762	0.215565
	0.629951	-0.0281886	0.13564	-0.166996		1.31208	-1.8255	0.176189	0.252831
	0.698032	-0.0771085	0.156993	-0.120802		1.25801	-1.78604	0.133751	0.32375
	0.755853	-0.118341	0.144277	-0.0214508		1.21575	-1.73906	0.163086	0.367087
	0.766592	-0.153447	0.140763	0.034288		1.14907	-1.71627	0.20206	0.36879
	0.748904	-0.162969	0.141643	-0.0248167		0.991747	-1.66902	0.194565	0.382662
	0.706833	-0.155328	0.170535	-0.102998		0.890776	-1.63377	0.146468	0.412473
	0.647552	-0.13698	0.218325	-0.120842		0.982661	-1.67234	0.0762004	0.427838
	0.616614	-0.10264	0.252027	-0.106988		1.14068	-1.69987	-0.00305997	0.459015
	0.609503	-0.0523617	0.259267	-0.0777567		1.21941	-1.65095	-0.000882947	0.500111
	0.60106	-0.00568828	0.231109	-0.0359816		1.22693	-1.59862	0.0942168	0.476329
	0.592563	0.0254119	0.214579	-0.0402975		1.17739	-1.5574	0.125083	0.410832
	0.614174	0.0488807	0.230805	-0.0788804		1.06738	-1.44628	0.00944202	0.381672
	0.645504	0.0560445	0.253754	-0.0473117		1.0138	-1.29239	-0.130085	0.386262
	0.671883	0.0497448	0.262264	0.0610635		1.02533	-1.18767	-0.182501	0.378764
	0.722704	0.0414244	0.275138	0.153529		0.931436	-1.10319	-0.163884	0.361509
	0.786476	0.0465015	0.312281	0.214452		0.717279	-1.01816	-0.0690839	0.314899
	0.826919	0.0536847	0.374767	0.277775		0.582558	-1.00491	0.0682133	0.234366
	0.846147	0.0571502	0.432934	0.315314		0.593342	-1.03071	0.13301	0.1889
	0.88494	0.0692595	0.454744	0.304668		0.662008	-0.982036	0.113946	0.235814
	0.916096	0.0848299	0.45182	0.281925		0.781135	-0.893188	0.116977	0.336009
	0.923182	0.0888567	0.473103	0.235321		0.920513	-0.861998	0.149871	0.413728
	0.921251	0.0856018	0.539746	0.124624		0.983294	-0.843701	0.142872	0.495933
	0.897707	0.107221	0.616604	0.0191985		0.999981	-0.818021	0.141472	0.60252
	0.843863	0.166292	0.660026	0.00790585		1.07926	-0.851622	0.163932	0.710305
	0.79506	0.26652	0.644063	0.0545722		1.19035	-0.904483	0.139903	0.801199
	0.783718	0.38073	0.646858	0.105669		1.2289	-0.869178	0.0689505	0.873658
	0.778731	0.441482	0.672924	0.184018		1.21282	-0.797254	0.0329669	0.867568
	0.789563	0.432041	0.733614	0.262369		1.17452	-0.769145	0.0189474	0.817597
	0.83522	0.414541	0.798288	0.295584		1.08287	-0.719907	-0.0193589	0.831562
	0.882802	0.445927	0.823648	0.33198		1.00155	-0.63583	0.00506739	0.889721
	0.892163	0.521609	0.822671	0.405257		1.0519	-0.593685	0.143138	0.906777
	0.876709	0.625919	0.831469	0.425449		1.19998	-0.589781	0.298992	0.917003
	0.881047	0.724924	0.86471	0.374322		1.31037	-0.540699	0.383548	0.959203
	0.911506	0.769499	0.943279	0.347208		1.39566	-0.496364	0.408108	1.00861
	0.980308	0.755727	1.00909	0.368642		1.47366	-0.497378	0.354278	1.05932
	1.07611	0.729825	1.03876	0.40043		1.48084	-0.448533	0.241005	1.12087
	1.16209	0.725193	1.05219	0.466422		1.44922	-0.347948	0.213985	1.17002
	1.21156	0.741252	1.09333	0.575363		1.49099	-0.282106	0.305846	1.22633
	1.25902	0.800426	1.16611	0.670612		1.55787	-0.245569	0.394283	1.3386
	1.33189	0.852549	1.24012	0.765785		1.59939	-0.155051	0.447903	1.52894
	1.39385	0.957774	1.29745	0.940144		1.7077	-0.0706828	0.546787	1.74554
	1.43178	1.04028	1.35211	1.15113		1.87253	-0.0314553	0.666474	1.93375
	1.4529	1.10132	1.43043	1.30632		1.96582	0.0456116	0.754072	2.07386
	1.47575	1.14076	1.54454	1.44025		2.0254	0.133828	0.842724	2.15407
	1.51185	1.16794	1.66982	1.60405		2.16286	0.137246	0.894774	2.20334
	1.58943	1.23363	1.77701	1.7545		2.31707	0.111238	0.838076	2.306
	1.69141	1.34132	1.83983	1.88405		2.39084	0.149421	0.74306	2.4821
	1.76575	1.44665	1.88151	2.01205		2.49569	0.193412	0.74973	2.61476
	1.80597	1.52921	1.93295	2.08491		2.57323	0.229488	0.841915	2.66342
	1.83738	1.60117	2.00193	2.10772		2.53993	0.340853	0.962392	2.65331
	1.88383	1.65694	2.07178	2.2018		2.47459	0.497563	1.12659	2.61753
	1.94158	1.70427	2.12469	2.38988		2.50468	0.60345	1.298	2.61241
	2.02702	1.78003	2.17426	2.55623		2.55457	0.697367	1.39295	2.70868
	2.12907	1.87789	2.25662	2.68837		2.77426	0.828519	1.45111	2.85168
	2.20996	1.97086	2.37233	2.84556		2.8542	0.916151	1.56079	2.96766
	2.27085	2.05288	2.48522	3.00603		2.88957	0.961962	1.65959	3.06843
	2.3405	2.13694	2.54525	3.12733		2.7857	1.07058	1.70663	3.20368
	2.41279	2.20445	2.54661	3.23701		2.64654	1.22247	1.76965	3.38048
	2.46213	2.24445	2.53402	3.33132		2.57181	1.33352	1.84051	3.55323
	2.53177	2.28329	2.56764	3.38496		2.4833	1.44943	1.84612	3.67604
	2.63804	2.34579	2.65728	3.45776		2.42199	1.59434	1.83443	3.74597
	2.75787	2.43555	2.75369	3.59758		2.50489	1.66779	1.87668	3.76286
	2.87933	2.54167	2.81001	3.72559		2.6402	1.67942	1.93684	3.76506
	2.9972	2.64789	2.83038	3.78697		2.67302	1.74119	2.02314	3.7752
	3.06949	2.70966	2.85668	3.83623		2.66478	1.83015	2.17905	3.76053
	3.08116	2.73872	2.92204	3.89351		2.70263	1.87918	2.33053	3.7124
	3.09135	2.78952	3.01814	3.94087		2.75447	1.96053	2.37745	3.73012
	3.11886	2.88914	3.08966	4.0476		2.82727	2.10732	2.37747	3.8312
	3.14999	3.02007	3.09526	4.24415		2.96007	2.22266	2.41385	3.92475
	3.17375	3.1591	3.05957	4.41773		3.06068	2.2939	2.46005	3.99081
	3.20175	3.2928	3.04092	4.50084		3.04141	2.37376	2.51245	4.06459
	3.22288	3.41156	3.07046	4.55823		3.01715	2.39695	2.60105	4.15053
	3.25473	3.50921	3.13196	4.60744		3.06549	2.30678	2.67008	4.2359
	3.33986	3.59579	3.19037	4.6189		3.08503	2.23628	2.64809	4.32514
	3.44196	3.66542	3.22648	4.63889		3.05876	2.27547	2.62724	4.38146
	3.49321	3.70642	3.25023	4.6869		3.06881	2.36511	2.67951	4.41651
	3.48881	3.73795	3.28778	4.69687		3.1092	2.49938	2.74723	4.48605
	3.48482	3.79423	3.31154	4.66568		3.16422	2.71479	2.81271	4.6238
	3.48869	3.86944	3.3095	4.67807		3.3271	2.90943	2.92189	4.74795
	3.51036	3.95774	3.30531	4.72826		3.56283	2.99021	3.04199	4.76936
	3.56514	4.06572	3.34494	4.75999		3.69351	3.03507	3.12245	4.72039
	3.61443	4.18144	3.42749	4.78667		3.71663	3.08718	3.22119	4.68539
	3.63843	4.26434	3.51583	4.81208		3.74756	3.10192	3.32808	4.68616
	3.67153	4.32379	3.55661	4.77099		3.79462	3.14477	3.35214	4.75398
	3.74699	4.38361	3.53486	4.68943		3.80927	3.28937	3.31777	4.87763
	3.82983	4.42789	3.49298	4.6714		3.84191	3.42826	3.32518	4.97126
	3.91781	4.46489	3.48269	4.71073		3.8777	3.48793	3.35204	5.03782
	4.01932	4.51934	3.50218	4.74663		3.84303	3.57111	3.31925	5.19534
	4.09861	4.59874	3.50322	4.78742		3.65329	3.68992	3.26816	5.40909
	4.12203	4.6928	3.46769	4.89677		3.60229	3.75243	3.23817	5.53764
	4.09976	4.81725	3.42518	4.96114		3.59651	3.80199	3.21409	5.52729
	4.06666	4.96056	3.42079	4.96657		3.5473	3.92234	3.23609	5.42143
	4.02378	5.07529	3.47599	4.9778		3.52585	4.03909	3.34121	5.2719
	4.00499	5.1432	3.56443	4.9622		3.57553	4.09972	3.41511	5.17717
	4.03647	5.18117	3.6368	4.87983		3.61962	4.17934	3.36415	5.18094
	4.09568	5.19847	3.66697	4.80675		3.67682	4.24432	3.30531	5.19956
	4.13587	5.20071	3.68237	4.7878		3.79094	4.20853	3.3199	5.17783
	4.15536	5.2264	3.72004	4.75886		3.8664	4.15356	3.36856	5.1596
	4.16368	5.2831	3.78178	4.71064		3.86226	4.1799	3.44382	5.19504
	4.14919	5.33864	3.83611	4.68878		3.92566	4.21512	3.55816	5.24729
	4.14914	5.38412	3.85308	4.66376		4.06046	4.24466	3.60412	5.30695
	4.18695	5.42703	3.84495	4.6282		4.13562	4.36165	3.54025	5.37774
	4.23417	5.43821	3.85475	4.65984		4.17755	4.50724	3.48282	5.42063
	4.24656	5.40078	3.9169	4.75766		4.26342	4.56551	3.47145	5.42197
	4.23859	5.36783	4.00299	4.81237		4.29755	4.59204	3.44609	5.46442
	4.23632	5.36841	4.05769	4.82369		4.23953	4.65038	3.43012	5.52659
	4.23942	5.40327	4.0549	4.85272		4.20031	4.66164	3.48694	5.48101
	4.26578	5.47386	4.0304	4.86772		4.16888	4.63567	3.56242	5.33229
	4.31811	5.57064	4.0067	4.85099		4.08576	4.66835	3.61453	5.20011
	4.37279	5.65541	4.01558	4.86687		4.04862	4.71919	3.68345	5.13938
	4.40176	5.71537	4.03955	4.90521		4.124	4.71992	3.73909	5.17029
	4.43803	5.77307	4.06862	4.90044		4.16532	4.75261	3.71729	5.26156
	4.49217	5.81735	4.09067	4.88347		4.14778	4.8603	3.68434	5.30763
	4.53257	5.80762	4.14063	4.89426		4.2105	4.93473	3.71986	5.24764
	4.56153	5.77928	4.22588	4.8754		4.3303	4.96149	3.74901	5.19697
	4.60437	5.79481	4.30194	4.816		4.39586	5.02072	3.74819	5.23427
	4.65209	5.88445	4.31506	4.79302		4.45064	5.0716	3.79488	5.32592
	4.67807	6.02128	4.27115	4.82402		4.49192	5.06269	3.85316	5.39415
	4.70471	6.16102	4.22126	4.85975		4.41097	5.08693	3.85031	5.39812
	4.7113	6.26192	4.20244	4.91609		4.28237	5.19357	3.85988	5.31508
	4.6803	6.31042	4.19854	5.00784		4.27618	5.28961	3.94059	5.17032
	4.65841	6.32946	4.19995	5.07174		4.35036	5.36963	3.9827	5.07842
	4.68675	6.3459	4.17274	5.09353		4.41304	5.48187	3.94609	5.10223
	4.73773	6.34041	4.14956	5.14008		4.51126	5.54802	3.89884	5.1851
	4.78223	6.3312	4.16979	5.1874		4.64875	5.51165	3.8623	5.25367
	4.84179	6.37192	4.22841	5.1451		4.73152	5.48682	3.83784	5.31643
	4.89605	6.46051	4.27985	5.03885		4.80319	5.5195	3.88553	5.35198
	4.92529	6.55341	4.2929	4.9487		4.93647	5.52286	3.97032	5.35306
	4.94406	6.6166	4.28394	4.89456		5.03492	5.52474	3.97161	5.36459
	4.96846	6.64378	4.28438	4.90563		4.99941	5.60871	3.93537	5.36594
	4.97831	6.62929	4.31717	5.00878		4.77594	5.71194	4.00525	5.29164
	4.97261	6.60377	4.36282	5.09075		4.76862	5.76596	4.15322	5.19791
	4.99125	6.60649	4.3866	5.03779		4.7829	5.83999	4.23968	5.17843
	5.01775	6.65454	4.37635	4.91425		4.82772	5.92795	4.25984	5.20525
	5.02688	6.74732	4.36339	4.82348		4.93915	5.92967	4.25242	5.16669
	5.01933	6.8859	4.38286	4.7589		5.01817	5.89518	4.22347	5.0366
	5.00218	7.05467	4.4321	4.72635		4.98974	5.92473	4.24824	4.89691
	4.94626	7.18393	4.48171	4.75889		4.96326	5.9564	4.34555	4.86641
	4.87429	7.24085	4.49541	4.79821		4.97336	5.9388	4.37918	4.9489
	4.84037	7.25075	4.46659	4.7838		4.95142	5.95733	4.28751	5.08324
	4.8301	7.24421	4.43421	4.77918		4.93345	5.99989	4.21418	5.15406
	4.82292	7.22836	4.44597	4.79614		4.96884	5.97916	4.22366	5.11964
	4.81584	7.2347	4.50466	4.82282		4.94845	5.97112	4.235	5.07996
	4.80552	7.27385	4.57039	4.82663		4.78293	6.06426	4.22311	5.13754
	4.76622	7.31074	4.60716	4.83316		4.55961	6.15417	4.21981	5.22184
	4.73022	7.35754	4.60615	4.77335		4.35618	6.16074	4.22514	5.24889
	4.73893	7.44168	4.5901	4.63138		4.1826	6.1686	4.24921	5.23727
	4.78309	7.53963	4.57817	4.53467		4.1317	6.17914	4.3517	5.20555
	4.84284	7.61755	4.57091	4.54247		4.25833	6.14578	4.45664	5.19515
	4.9081	7.6768	4.5612	4.57616		4.43723	6.15806	4.43993	5.2554
	4.97313	7.71082	4.55717	4.6097		4.55166	6.27322	4.34688	5.33463
	5.00616	7.70843	4.57425	4.66496		4.67574	6.36925	4.32067	5.30492
	5.01703	7.69798	4.60419	4.68494		4.79267	6.40118	4.37649	5.19479
	5.02145	7.70445	4.62115	4.66022		4.78133	6.46457	4.4688	5.14091
	5.00321	7.72897	4.60111	4.67993		4.72	6.5202	4.59691	5.20566
	4.95367	7.72181	4.56782	4.75401		4.74392	6.48116	4.67922	5.3437
	4.90641	7.7762	4.56708	4.79543		4.80918	6.43745	4.64123	5.47728
	4.89127	7.85592	4.62441	4.80988		4.88389	6.46881	4.57225	5.52662
	4.8841	7.90529	4.70984	4.84081		5.04893	6.49193	4.56652	5.4719
	4.89739	7.91374	4.77281	4.84044		5.2052	6.51361	4.55171	5.38864
	4.94138	7.91655	4.78152	4.79477		5.22458	6.63445	4.49319	5.38319
	4.99284	7.93714	4.74878	4.78967		5.22624	6.78075	4.51069	5.39956
	5.02149	7.98397	4.71454	4.83286		5.32538	6.84474	4.63772	5.33679
	5.0412	8.07411	4.71869	4.84621		5.41254	6.88866	4.78489	5.2069
	5.06468	8.17178	4.73818	4.8342		5.42765	6.94734	4.8834	5.09474
	5.07816	8.24428	4.75292	4.83214		5.44188	6.93474	4.87812	5.0338
	5.0959	8.30737	4.76795	4.79512		5.43126	6.88775	4.69825	5.08263
	5.11938	8.37095	4.80723	4.73216		5.38157	6.91059	4.44676	5.19552
	5.12702	8.41206	4.8752	4.7145		5.43685	6.95033	4.35565	5.2131
	5.10359	8.42172	4.95236	4.71258		5.60679	6.96712	4.45539	5.09986
	5.09385	8.41554	5.00109	4.65375		5.68946	7.05204	4.60156	5.0001
	5.10985	8.39805	4.99552	4.58814		5.64291	7.19639	4.70414	4.99125
	5.11926	8.3879	4.95467	4.56216		5.50107	7.25259	4.68864	5.01616
	5.13763	8.41401	4.93424	4.51835		5.54414	7.22282	4.64276	5.02747
	5.19959	8.48312	4.94851	4.44019		5.52945	7.20482	4.5705	4.99121
	5.29075	8.5554	4.95955	4.39369		5.54709	7.17065	4.56059	4.91274
	5.37314	8.59324	4.94341	4.37831		5.61525	7.09719	4.54539	4.86724
	5.45375	8.60757	4.91139	4.3563		5.60477	7.07547	4.47179	4.91307
	5.50052	8.61479	4.89323	4.36457		5.53788	7.11473	4.47274	4.95439
	5.48633	8.62922	4.90906	4.42338		5.50161	7.13063	4.61278	4.86474
	5.45567	8.66568	4.94712	4.48177		5.43183	7.17062	4.75337	4.69741
	5.43719	8.73773	4.95854	4.52642		5.32678	7.29638	4.81353	4.60132
	5.41248	8.82242	4.92889	4.59313		5.33025	7.39375	4.82471	4.61573
	5.38394	8.91549	4.88874	4.62859		5.44003	7.37649	4.8035	4.72045
	5.39537	9.02915	4.87867	4.56667		5.49225	7.33466	4.78768	4.86719
	5.42101	9.12928	4.91137	4.46343		5.47929	7.30156	4.83967	4.94067
	5.4326	9.17315	4.96975	4.38074		5.47082	7.22525	4.90482	4.88108
	5.43959	9.15668	5.01713	4.29991		5.44335	7.17598	4.858	4.83519
	5.44689	9.10802	5.028	4.25607		5.41533	7.2202	4.76236	4.88996
	5.43335	9.05028	5.01432	4.3013		5.52543	7.27289	4.75786	4.98198
	5.4101	9.0232	4.99399	4.35394		5.75727	7.29522	4.83785	5.02781
	5.42198	9.04962	4.95927	4.32413		5.93367	7.3727	4.9276	5.01656
	5.44654	9.11022	4.89678	4.27569		6.0007	7.46578	5.03911	4.9523
	5.46752	9.16552	4.80578	4.26129		5.97221	7.45544	5.13422	4.9053
	5.50115	9.20892	4.73404	4.23793		5.78297	7.40996	5.12737	4.92711
	5.55081	9.25249	4.75855	4.20445		5.48899	7.4358	5.10693	4.95307
	5.57293	9.27673	4.83338	4.20767		5.2999	7.48743	5.17215	4.8895
	5.56506	9.23706	4.90066	4.22032		5.26279	7.53729	5.22962	4.771
	5.55086	9.27739	4.91399	4.23254		5.26001	7.65262	5.17545	4.69244
	5.51012	9.32646	4.88859	4.29829		5.28382	7.7678	5.09319	4.65015
	5.46507	9.35645	4.85456	4.38173		5.32911	7.78204	5.04785	4.6059
	5.45887	9.40758	4.88065	4.36827		5.31814	7.78046	5.05355	4.58635
	5.49938	9.49563	4.89112	4.2701		5.24492	7.83919	5.1683	4.61038
	5.55965	9.56325	4.87282	4.19161		5.20637	7.86775	5.36723	4.6376
	5.64945	9.59784	4.84942	4.12204		5.18684	7.8531	5.49183	4.67078
	5.76364	9.60937	4.86712	4.03093		5.12214	7.90428	5.49184	4.72568
	5.83929	9.59416	4.93844	3.97157		5.08885	7.96848	5.51299	4.7358
	5.84636	9.5673	5.03205	3.94375		5.1459	7.93639	5.60316	4.66284
	5.80505	9.56333	5.07873	3.8913		5.18415	7.88286	5.66978	4.58067
	5.76338	9.57654	5.06833	3.85879		5.13177	7.8868	5.69399	4.54321
	5.72945	9.59056	5.03884	3.88807		5.09634	7.88628	5.69492	4.58991
	5.71595	9.62664	5.03025	3.8891		5.09218	7.88934	5.64168	4.72563
	5.71815	9.67339	5.04618	3.82282		5.07235	7.97969	5.5788	4.86818
	5.71031	9.68492	5.05641	3.78153		5.13768	8.08504	5.63352	4.89349
	5.693	9.64448	5.03432	3.79755		5.3245	8.11904	5.74171	4.84426
	5.69429	9.59648	4.98365	3.82392		5.43833	8.14252	5.75594	4.83292
	5.71944	9.55394	4.93546	3.86281		5.45149	8.16264	5.70218	4.89056
	5.72732	9.50364	4.92117	3.90916		5.43134	8.09331	5.66411	4.92463
	5.73674	9.47267	4.93377	3.88941		5.38392	8.00904	5.62857	4.88815
	5.77539	9.49244	4.94819	3.83561		5.28747	8.04641	5.60443	4.82481
	5.83124	9.55586	4.94893	3.86494		5.26732	8.12445	5.63293	4.80503
	5.87184	9.64728	4.96004	3.95887		5.33782	8.14832	5.62787	4.84509
	5.87685	9.75152	5.00575	3.98669		5.37395	8.19236	5.55061	4.88622
	5.82622	9.8074	5.08269	3.93502		5.40136	8.28262	5.52846	4.80695
	5.72385	9.78721	5.15167	3.8674		5.52273	8.32276	5.63322	4.57187
	5.65216	9.74746	5.18372	3.81324		5.61892	8.32922	5.73415	4.34792
	5.66006	9.73882	5.18838	3.82999		5.60557	8.35816	5.74234	4.29804
	5.71258	9.76759	5.19429	3.94906		5.61886	8.33168	5.69878	4.40243
	5.74409	9.82774	5.22572	4.04852		5.70777	8.2407	5.60456	4.55246
	5.74437	9.91055	5.26938	4.01392		5.74142	8.21496	5.46461	4.66898
	5.71251	9.97023	5.28448	3.92575		5.71212	8.26439	5.36576	4.71745
	5.64898	9.99367	5.2528	3.88616		5.69993	8.27707	5.30932	4.7397
	5.60649	10.0029	5.21934	3.87809		5.65735	8.28154	5.20656	4.8093
	5.61216	10.0223	5.22795	3.88881		5.59857	8.35103	5.12395	4.89917
	5.6441	10.043	5.27104	3.9277		5.66539	8.41332	5.18231	4.89479
	5.67903	10.0575	5.31083	3.92942		5.82834	8.37962	5.30005	4.78944
	5.73166	10.0749	5.32371	3.86276		5.91015	8.49345	5.36051	4.70747
	5.7591	10.0836	5.32358	3.8135		5.90978	8.64436	5.38561	4.75073
	5.73257	10.0874	5.34777	3.81624		5.88935	8.70599	5.39117	4.85322
	5.70484	10.1102	5.41391	3.80342		5.81487	8.71467	5.33911	4.92641
	5.71282	10.1699	5.47094	3.7839		5.73897	8.73333	5.30864	4.88004
	5.74366	10.2347	5.47081	3.8333		5.79885	8.68644	5.36764	4.70284
	5.77961	10.2887	5.41089	3.92938		5.94109	8.57048	5.42693	4.50506
	5.82291	10.3256	5.33575	3.98454		6.00701	8.50959	5.41406	4.44689
	5.83968	10.317	5.29868	3.9767		6.00699	8.4995	5.38609	4.48017
	5.84043	10.2764	5.31212	3.88462		6.00418	8.45081	5.36477	4.44897
	5.87616	10.2558	5.35002	3.70588		5.95706	8.4289	5.30927	4.33004
	5.95279	10.2792	5.35805	3.55629		5.89652	8.48407	5.27623	4.19625
	6.02261	10.3224	5.39219	3.53003		5.94021	8.5231	5.3012	4.12949
	6.05464	10.3622	5.43487	3.53023		6.06011	8.53452	5.30982	4.20478
	6.06382	10.3784	5.49293	3.46424		6.1286	8.61699	5.26235	4.36275
	6.0359	10.3577	5.53749	3.3923		6.18246	8.71525	5.24164	4.40408
	5.99113	10.3158	5.53271	3.36292		6.24298	8.71197	5.2473	4.23847
	5.97678	10.2873	5.48649	3.35184		6.18595	8.66959	5.20953	4.00502
	5.99578	10.2961	5.44814	3.37912		6.00611	8.64372	5.19444	3.86169
	6.00529	10.322	5.46859	3.44409		5.88263	8.5647	5.26812	3.81228
	6.00681	10.3691	5.53332	3.44879		5.8759	8.46258	5.34124	3.77839
	6.03085	10.4424	5.58027	3.36766		5.92182	8.46415	5.39696	3.72159
	6.0487	10.5038	5.57733	3.30334		6.0325	8.51941	5.46107	3.64477
	6.0622	10.5154	5.55891	3.30184		6.16503	8.5257	5.49344	3.61472
	6.09153	10.4987	5.56839	3.31646		6.19958	8.54598	5.43173	3.72541
	6.13487	10.4821	5.60384	3.34054		6.14203	8.61092	5.37964	3.89311
	6.17448	10.4619	5.63031	3.37681		6.11131	8.63013	5.41638	3.96741
	6.22255	10.4719	5.62355	3.37231		6.06572	8.61976	5.47354	3.95843
	6.27259	10.5258	5.61121	3.32573		5.90455	8.66847	5.48865	4.00018
	6.28137	10.5928	5.63637	3.30327		5.7145	8.69673	5.49771	4.07966
	6.25975	10.6533	5.69455	3.26585		5.59982	8.63582	5.46756	4.15938
	6.25602	10.7048	5.73567	3.14527		5.52763	8.60573	5.37025	4.20581
	6.30494	10.7139	5.72194	3.0355		5.51964	8.65572	5.31186	4.1583
	6.37344	10.6585	5.6771	3.05434		5.66357	8.69218	5.35491	4.02625
	6.43106	10.5798	5.65452	3.146		5.85091	8.71361	5.40994	3.9704
	6.45518	10.5167	5.68575	3.23226		5.92774	8.76582	5.42469	4.04624
	6.43206	10.4778	5.74605	3.29424		5.97894	8.7455	5.46125	4.1316
	6.40283	10.4701	5.78274	3.28909		6.06041	8.62101	5.46795	4.12946
	6.42291	10.5165	5.75804	3.21223		6.09054	8.53768	5.38494	4.04635
	6.48474	10.5981	5.69578	3.17234		6.1049	8.53307	5.30928	3.97553
	6.5206	10.6706	5.66723	3.21297		6.20557	8.51297	5.32157	3.83062
	6.53637	10.7266	5.70982	3.25564		6.29298	8.51878	5.3624	3.73479
	6.56011	10.7542	5.78737	3.28404		6.29597	8.62643	5.41306	3.6265
	6.589	10.7292	5.83439	3.34294		6.32326	8.72825	5.50403	3.43652
	6.61892	10.6692	5.83044	3.38451		6.35819	8.75622	5.55487	3.24542
	6.64512	10.6307	5.80658	3.33996		6.26486	8.78249	5.53148	3.20063
	6.64219	10.6096	5.80296	3.25925		6.10391	8.80056	5.55757	3.30548
	6.59427	10.5859	5.81782	3.19617		6.01138	8.7461	5.66579	3.44448
	6.56251	10.5741	5.82414	3.11994		5.94368	8.71114	5.73932	3.51686
	6.58133	10.5763	5.81465	3.04797		5.88101	8.78274	5.74791	3.44886
	6.62966	10.5735	5.8173	3.03811		5.91304	8.85384	5.74366	3.25412
	6.67783	10.5597	5.87657	3.04123		5.98786	8.86477	5.66861	3.12263
	6.7321	10.5425	5.99328	2.98988		5.9767	8.8914	5.51225	3.15681
	6.77797	10.5126	6.0976	2.93705		5.96263	8.91805	5.45055	3.26232
	6.79235	10.4826	6.13766	2.93664		6.05836	8.86866	5.51636	3.30064
	6.80285	10.4844	6.13884	2.96395		6.16712	8.80814	5.61259	3.28182
	6.80534	10.5292	6.13378	3.02763		6.2251	8.79294	5.70762	3.26049
	6.77115	10.5887	6.16828	3.12986		6.32724	8.73897	5.79563	3.30043
	6.71196	10.6378	6.22974	3.19276		6.46553	8.65527	5.7855	3.41128
	6.68366	10.6761	6.26568	3.18421		6.53973	8.6706	5.70307	3.52346
	6.68159	10.687	6.2571	3.18572		6.56687	8.76846	5.69932	3.52799
	6.69642	10.6718	6.24272	3.21031		6.56401	8.83173	5.77556	3.41915
	6.75843	10.6653	6.27079	3.19042		6.46087	8.8941	5.80968	3.30067
	6.84017	10.6845	6.33505	3.13948		6.36393	8.98604	5.8273	3.25236
	6.89274	10.7027	6.391	3.12039		6.45768	9.01617	5.8639	3.2561
	6.91229	10.7179	6.40015	3.10624		6.67891	8.99467	5.84984	3.28137
	6.93152	10.7458	6.34843	3.07071		6.80627	8.98583	5.79376	3.32816
	6.94044	10.7653	6.34786	3.05685		6.80693	9.0344	5.79542	3.38405
	6.93904	10.7707	6.37679	3.0459		6.73126	8.99553	5.85224	3.42896
	6.94782	10.7617	6.41475	2.98034		6.57043	8.97446	5.89509	3.44965
	6.96106	10.7313	6.4256	2.91973		6.39649	9.04299	5.93847	3.37076
	6.96889	10.6858	6.40153	2.93629		6.34188	9.0989	5.97107	3.17257
	6.97943	10.6718	6.37635	2.95784		6.37743	9.10911	5.90485	2.9957
	7.0113	10.7147	6.38891	2.92701		6.40057	9.13507	5.75708	2.98153
	7.02493	10.7708	6.43343	2.90848		6.46725	9.12188	5.64092	3.12316
	7.01544	10.8126	6.46454	2.92		6.59725	9.02954	5.56465	3.3108
	7.01799	10.7895	6.44839	2.93716		6.66966	8.98197	5.47711	3.48265
	7.03319	10.8216	6.39948	3.01275		6.66804	9.01518	5.45643	3.61313
	7.02968	10.8623	6.37552	3.15142		6.69502	9.0215	5.52459	3.69623
	7.01516	10.8928	6.41016	3.2282		6.71449	9.0121	5.5744	3.68972
	7.02121	10.8916	6.47568	3.19128		6.64761	9.07216	5.57692	3.58371
	7.02821	10.8428	6.51414	3.12383		6.60181	9.11306	5.61909	3.37251
	7.04464	10.7906	6.49842	3.04639		6.64092	9.05062	5.67693	3.147
	7.07078	10.8071	6.45646	2.93041		6.65613	8.99689	5.66726	3.05409
	7.06818	10.8878	6.42756	2.82857		6.61638	8.99999	5.62064	3.10574
	7.01146	10.9626	6.44267	2.8048		6.60098	8.98888	5.55418	3.19153
	6.94818	11.0163	6.45852	2.82959		6.58796	9.01007	5.45992	3.2162
	6.93005	11.0472	6.45253	2.90315		6.53853	9.15142	5.41804	3.15531
	6.94131	11.036	6.4323	3.04633		6.56096	9.30139	5.50475	3.00485
	6.96616	10.99	6.42869	3.16928		6.64882	9.36308	5.60554	2.87953
	6.99238	10.9436	6.45979	3.18957		6.65986	9.41818	5.59402	2.93734
	7.00974	10.9111	6.50202	3.18262		6.60839	9.47231	5.52251	3.11354
	6.99571	10.9053	6.52367	3.19593		6.63009	9.44571	5.45206	3.21955
	6.96625	10.9625	6.51516	3.15157		6.65636	9.40558	5.3389	3.17978
	6.94001	11.0689	6.48419	3.05026		6.59354	9.4447	5.21411	3.04483
	6.90504	11.1706	6.44132	2.98248		6.55237	9.47787	5.19275	2.90316
	6.88865	11.2309	6.37396	2.95394		6.57412	9.48131	5.25801	2.87638
	6.92701	11.2637	6.32079	2.95377		6.57431	9.55653	5.35695	3.00632
	7.00798	11.2818	6.27632	3.03227		6.60131	9.65073	5.53824	3.18947
	7.07013	11.2993	6.26552	3.15989		6.69632	9.63499	5.7561	3.31115
	7.1101	11.3454	6.30167	3.21427		6.71057	9.57555	5.84567	3.36172
	7.12854	11.4054	6.35802	3.17388		6.62516	9.57062	5.78279	3.36273
	7.11049	11.4349	6.38836	3.09049		6.61468	9.54434	5.67213	3.28362
	7.08387	11.4376	6.37626	2.95741		6.66652	9.48261	5.51679	3.18667
	7.08512	11.4586	6.34133	2.78994		6.63415	9.48899	5.37146	3.13201
	7.09291	11.4929	6.32726	2.68524		6.54985	9.53845	5.35357	3.08582
	7.05789	11.5208	6.36531	2.68286		6.48104	9.55103	5.44713	2.99387
	7.00168	11.544	6.43769	2.72437		6.35318	9.59004	5.50378	2.90505
	6.94911	11.5528	6.49749	2.81411		6.18798	9.68473	5.53552	2.80317
	6.91071	11.5439	6.51896	2.96842		6.14243	9.70679	5.6066	2.64171
	6.89889	11.5427	6.52995	3.0931		6.21055	9.63876	5.63504	2.48259
	6.9193	11.5678	6.55502	3.10811		6.30524	9.58895	5.56981	2.42109
	6.9361	11.5885	6.57446	3.06927		6.47367	9.55078	5.49606	2.45422
	6.9277	11.5842	6.54336	3.02011		6.71177	9.48403	5.46514	2.5388
	6.94345	11.5659	6.44404	2.96015		6.84796	9.48039	5.46502	2.61136
	6.97307	11.5475	6.31576	2.94299		6.87127	9.56052	5.54204	2.60828
	6.96443	11.5258	6.24198	2.98718		6.92912	9.60318	5.67339	2.54815
	6.92119	11.5065	6.26802	2.98869		7.00659	9.60481	5.6954	2.55296
	6.90209	11.5126	6.3477	2.90852		6.99867	9.66227	5.58529	2.64747
	6.9195	11.522	6.4088	2.83889		6.9665	9.72375	5.50091	2.72745
	6.96918	11.5167	6.42468	2.80783		6.93939	9.68845	5.49134	2.72128
	7.05316	11.5155	6.41958	2.75264		6.82989	9.62456	5.49111	2.70984
	7.10816	11.5247	6.43037	2.68163		6.69444	9.58436	5.51166	2.75521
	7.10009	11.5138	6.47514	2.64095		6.67045	9.51613	5.53316	2.80662
	7.06598	11.4835	6.52578	2.62418		6.73295	9.47415	5.48012	2.7948
	7.05425	11.4581	6.54151	2.64684		6.78293	9.53216	5.4227	2.66469
	7.04474	11.4262	6.51914	2.74077		6.8357	9.60344	5.46905	2.43017
	7.02344	11.4042	6.49336	2.81353		6.87478	9.57697	5.56196	2.21156
	6.99588	11.424	6.48462	2.75367		6.82228	9.53931	5.58912	2.14937
	6.94529	11.4782	6.49664	2.63698		6.75032	9.53065	5.60285	2.20933
	6.87951	11.5265	6.51332	2.59557		6.77216	9.47204	5.63437	2.30463
	6.84018	11.5646	6.52202	2.63367		6.80199	9.41186	5.6132	2.3927
	6.86699	11.6024	6.53106	2.71593		6.729	9.44514	5.53123	2.47998
	6.92331	11.6217	6.56044	2.83088		6.68005	9.49801	5.46423	2.56109
	6.98152	11.6164	6.60879	2.90092		6.77857	9.49982	5.41164	2.65772
	7.04179	11.5961	6.6415	2.88186		6.9668	9.53291	5.3596	2.73942
	7.08943	11.57	6.61867	2.85704		7.18501	9.58585	5.40309	2.71104
	7.11734	11.5476	6.55293	2.86887		7.3711	9.55137	5.52837	2.5354
	7.13969	11.5782	6.49201	2.8299		7.37043	9.47855	5.58554	2.34375
	7.16024	11.6725	6.47624	2.73317		7.15165	9.48019	5.56264	2.289
	7.14246	11.7643	6.50647	2.67655		6.94448	9.49567	5.58441	2.38816
	7.11704	11.8175	6.55267	2.67617		6.85856	9.4727	5.64821	2.51969
	7.12792	11.8472	6.58927	2.69046		6.80109	9.51016	5.69795	2.57573
	7.15774	11.8505	6.6186	2.73389		6.74532	9.59802	5.78016	2.5189
	7.16978	11.8149	6.65703	2.7777		6.73934	9.63315	5.85902	2.42805
	7.16843	11.7822	6.70247	2.73058		6.72955	9.66361	5.83579	2.40004
	7.18265	11.7605	6.74285	2.62506		6.69884	9.75548	5.76102	2.42404
	7.21029	11.7251	6.7663	2.57825		6.754	9.78475	5.7421	2.41954
	7.25568	11.695	6.77231	2.57963		6.92971	9.6986	5.74024	2.41947
	7.30191	11.7031	6.78032	2.57629		6.98588	9.63638	5.70074	2.5035
	7.32952	11.732	6.8015	2.6096		6.93165	9.63541	5.69545	2.62364
	7.33539	11.7523	6.82996	2.68976		6.88632	9.64661	5.71013	2.68844
	7.36843	11.7774	6.84802	2.74155		6.83875	9.72993	5.6571	2.65052
	7.45448	11.7975	6.84431	2.75657		6.80166	9.88246	5.57507	2.53931
	7.53807	11.7958	6.82756	2.7503		6.8865	9.93541	5.5796	2.40596
	7.57972	11.7927	6.82618	2.65498		7.01273	9.86293	5.62951	2.35692
	7.57186	11.8142	6.85072	2.48453		7.0247	9.81035	5.67583	2.43573
	7.51745	11.842	6.88555	2.38388		7.01069	9.79644	5.76462	2.58128
	7.4254	11.8615	6.91871	2.39759		7.0662	9.77764	5.84036	2.67353
	7.35518	11.891	6.94679	2.41877		7.06679	9.82067	5.80501	2.65197
	7.3218	11.9207	6.97262	2.41319		6.97314	9.92803	5.72526	2.50826
	7.28272	11.9363	6.99301	2.41878		6.92419	9.95202	5.68784	2.29494
	7.24716	11.9626	6.99818	2.42926		6.92439	9.89287	5.6269	2.13127
	7.26625	12.018	6.96955	2.45722		6.92072	9.87415	5.54588	2.12072
	7.35641	12.0635	6.90674	2.55515		6.98206	9.86828	5.54366	2.21559
	7.47173	12.0787	6.84517	2.66912		7.11173	9.80027	5.59383	2.31883
	7.5816	12.0778	6.8322	2.70026		7.15959	9.74465	5.62138	2.39368
	7.65187	12.0463	6.87296	2.68603		7.12958	9.74413	5.66301	2.4359
	7.66398	11.9769	6.90993	2.70504		7.14042	9.71845	5.73506	2.42258
	7.65842	11.9002	6.94682	2.70811		7.13284	9.69572	5.73462	2.39509
	7.68179	11.8591	6.94754	2.71735		7.00921	9.75624	5.64134	2.37867
	7.7194	11.8573	6.93121	2.75124		6.89033	9.81811	5.54976	2.33855
	7.73077	11.8956	6.93483	2.78386		6.87348	9.80244	5.48504	2.26308
	7.73913	11.9701	6.96871	2.75189		6.8794	9.79944	5.43224	2.22247
	7.74735	12.05	7.01232	2.70145		6.89986	9.84101	5.4569	2.21626
	7.75722	12.0956	7.04595	2.66813		6.98403	9.83301	5.57056	2.17158
	7.79088	12.0964	7.06679	2.59656		7.04352	9.80043	5.63832	2.08271
	7.84275	12.0823	7.0615	2.50255		7.01803	9.82863	5.62999	1.97253
	7.85048	12.0631	7.02829	2.49016		7.01699	9.85372	5.6182	1.86065
	7.8063	12.058	6.98461	2.56541		7.04149	9.81439	5.58591	1.7806
	7.78057	12.0891	6.94735	2.65923		6.96611	9.80305	5.50094	1.79199
	7.7803	12.1473	6.90531	2.75812		6.85957	9.83724	5.47762	1.83749
	7.78623	12.2114	6.90905	2.83201		6.85167	9.82407	5.54313	1.83595
	7.79214	12.291	6.91863	2.81321		6.86818	9.81401	5.569	1.80936
	7.79481	12.3893	6.91892	2.73671		6.81854	9.89276	5.50767	1.81486
	7.78045	12.4547	6.91488	2.70468		6.77875	9.97614	5.39653	1.81943
	7.78725	12.4628	6.918	2.68916		6.77316	10.0014	5.23459	1.81069
	7.85484	12.4308	6.93836	2.63177		6.71459	10.0676	5.07725	1.81866
	7.93594	12.3892	6.97665	2.59706		6.64655	10.1724	5.0927	1.83037
	7.97953	12.366	7.02261	2.6462		6.65526	10.2065	5.29526	1.81742
	7.98143	12.39	7.05864	2.72347		6.71757	10.2106	5.48733	1.84272
	7.97466	12.4484	7.0738	2.79324		6.78898	10.2631	5.54695	1.91239
	7.95523	12.4785	7.07794	2.85392		6.93787	10.2806	5.50483	1.94821
	7.93416	12.4681	7.08485	2.84015		7.10339	10.2227	5.4075	1.8976
	7.92639	12.4541	7.0971	2.7444		7.15068	10.2026	5.31557	1.7944
	7.91273	12.4541	7.1061	2.68919		7.13501	10.2242	5.34792	1.65727
	7.90542	12.4498	7.11716	2.71679		7.15184	10.2052	5.45656	1.54119
	7.94264	12.4584	7.13886	2.72485		7.11854	10.1967	5.48216	1.50762
	8.01672	12.4924	7.17195	2.66253		6.97683	10.2501	5.45642	1.52435
	8.04017	12.5228	7.21658	2.56203		6.84039	10.2659	5.50573	1.4987
	7.99278	12.5546	7.26176	2.42829		6.73367	10.2194	5.5808	1.44333
	7.91549	12.6042	7.295	2.31388		6.6022	10.2179	5.58956	1.43512
	7.84527	12.6443	7.30954	2.32391		6.52265	10.2168	5.59708	1.44556
	7.81028	12.6497	7.30912	2.43165		6.55751	10.1159	5.60858	1.43463
	7.81804	12.6569	7.28878	2.49137		6.60745	10.0174	5.58146	1.41436
	7.83619	12.6672	7.25344	2.48334		6.61752	10.0289	5.52594	1.40865
	7.82243	12.646	7.22071	2.49749		6.66791	10.0715	5.61035	1.43178
	7.8164	12.6061	7.20252	2.53486		6.69771	10.1073	5.61864	1.55836
	7.85534	12.5819	7.19662	2.56018		6.59326	10.1868	5.51573	1.77979
	7.91329	12.5793	7.18427	2.58847		6.471	10.2215	5.45956	1.98529
	7.92514	12.6067	7.1504	2.60187		6.4613	10.1406	5.50899	2.09427
	7.87371	12.6864	7.112	2.55827		6.48362	10.0734	5.57563	2.15018
	7.78692	12.7774	7.08598	2.52922		6.48566	10.103	5.61968	2.19643
	7.69287	12.8259	7.09179	2.58466		6.54518	10.123	5.6304	2.25571
	7.65096	12.8415	7.1328	2.65145		6.59944	10.1179	5.54418	2.33011
	7.67627	12.8548	7.19347	2.67187		6.56863	10.1683	5.43622	2.35206
	7.72152	12.8683	7.2575	2.70663		6.55222	10.22	5.48252	2.2319
	7.74548	12.881	7.32627	2.77284		6.57022	10.2156	5.61255	2.04724
	7.77424	12.9122	7.40281	2.81762		6.46585	10.2309	5.64388	1.9416
	7.8079	12.9437	7.4746	2.84996		6.24842	10.2668	5.60417	1.93791
	7.81247	12.9533	7.51885	2.88286		6.0866	10.2037	5.60184	1.93026
	7.80832	12.9482	7.52093	2.85486		5.99693	10.0875	5.6113	1.89417
	7.81912	12.9233	7.48354	2.77709		5.95382	10.0564	5.63747	1.88845
	7.83547	12.8445	7.42617	2.74361		6.03355	10.0722	5.70944	1.95892
	7.84009	12.7317	7.37274	2.74983		6.19266	10.0594	5.72838	2.05989
	7.84838	12.6573	7.32943	2.72045		6.27137	10.0687	5.65711	2.07645
	7.83654	12.6434	7.28914	2.68646		6.28797	10.0917	5.60918	1.91125
	7.79088	12.6778	7.2494	2.70005		6.35435	10.0376	5.66051	1.61635
	7.75819	12.7407	7.23133	2.72275		6.40922	9.96304	5.7088	1.41463
	7.78083	12.8103	7.24847	2.74684		6.38727	9.95883	5.73111	1.44706
	7.84172	12.859	7.285	2.81587		6.38318	9.94464	5.75921	1.66832
	7.88961	12.8955	7.3129	2.87772		6.40603	9.87119	5.75819	1.89388
	7.90963	12.9425	7.31779	2.86486		6.32832	9.85104	5.69766	2.12764
	7.8684	12.9884	7.31652	2.85197		6.18051	9.90462	5.71441	2.22486
	7.77853	13.0094	7.32395	2.90483		6.07688	9.92156	5.74299	2.19061
	7.71662	13.0027	7.36533	2.96422		6.00479	9.92089	5.67722	2.10859
	7.72431	12.9841	7.4255	2.99677		5.9805	9.95159	5.5838	2.02997
	7.76458	12.9526	7.46987	3.04164		6.1198	9.93013	5.59703	1.93408
	7.79646	12.9245	7.4692	3.07484		6.37908	9.83613	5.67325	1.8499
	7.82121	12.9231	7.41805	3.08061		6.55711	9.80702	5.71865	1.8656
	7.81414	12.9371	7.33786	3.12408		6.63368	9.85007	5.77161	2.00483
	7.7878	12.9493	7.26155	3.20289		6.67567	9.8438	5.84593	2.15719
	7.7755	12.9734	7.20808	3.22377		6.64663	9.81467	5.88086	2.24291
	7.77538	13.0211	7.17372	3.19751		6.56502	9.8267	5.91872	2.23804
	7.75757	13.0568	7.15809	3.21974		6.56983	9.80914	5.98852	2.18042
	7.74245	13.0567	7.16566	3.2826		6.63685	9.74848	5.99528	2.15715
	7.77901	13.0209	7.20426	3.32794		6.62313	9.7577	5.91226	2.25934
	7.84358	12.9665	7.2612	3.36628		6.56803	9.8106	5.86641	2.41754
	7.89597	12.9303	7.30578	3.37453		6.5659	9.79747	5.94805	2.49211
	7.90911	12.954	7.32218	3.30089		6.56168	9.77526	6.03174	2.4372
	7.85698	13.0256	7.31706	3.20599		6.5042	9.81175	6.0944	2.27963
	7.83505	13.0784	7.31304	3.18645		6.45332	9.82206	6.14463	2.04477
	7.81796	13.0999	7.32538	3.20465		6.38828	9.77452	6.146	1.82097
	7.83417	13.1172	7.34846	3.20871		6.26864	9.75288	6.10635	1.70993
	7.84466	13.1315	7.35676	3.23953		6.2323	9.71283	6.12893	1.66936
	7.82863	13.1271	7.35282	3.28574		6.36417	9.60477	6.16799	1.67199
	7.82364	13.1223	7.35141	3.26801		6.50971	9.54571	6.09306	1.80012
	7.8656	13.1246	7.35843	3.20207		6.54636	9.58478	5.95214	2.07949
	7.92163	13.1153	7.37097	3.15707		6.56081	9.58836	5.86496	2.34793
	7.97102	13.1089	7.37323	3.12346		6.57031	9.52651	5.81689	2.44887
	7.99727	13.1217	7.35099	3.12578		6.52257	9.521	5.79145	2.36664
	7.96997	13.1303	7.31157	3.22736		6.49525	9.54465	5.85314	2.1949
	7.90731	13.1103	7.28356	3.36069		6.49549	9.50792	5.93139	2.10923
	7.85988	13.0829	7.27606	3.38641		6.38986	9.46405	5.92025	2.21352
	7.84929	13.056	7.27834	3.31601		6.20304	9.44476	5.89458	2.35502
	7.84388	13.0274	7.28546	3.23564		6.12535	9.37734	5.93545	2.33355
	7.85052	13.0288	7.30746	3.14679		6.14191	9.31825	5.95934	2.17791
	7.8769	13.064	7.35229	3.06034		6.15105	9.38223	5.90319	2.07906
	7.90062	13.0853	7.41153	3.03859		6.23206	9.47134	5.77978	2.08729
	7.89728	13.066	7.46503	3.06797		6.42688	9.46918	5.65448	2.15323
	7.87248	13.0422	7.49337	3.09726		6.58944	9.44226	5.52238	2.20975
	7.83976	13.0315	7.49284	3.15261		6.663	9.4295	5.48705	2.18877
	7.80006	13.0312	7.4872	3.2242		6.70486	9.36484	5.55521	2.08673
	7.80201	13.0462	7.50713	3.20263		6.64093	9.30207	5.57395	2.05756
	7.85739	13.0713	7.5521	3.08929		6.44062	9.32414	5.52465	2.1505
	7.91128	13.0855	7.59688	3.01648		6.28552	9.33729	5.57153	2.23721
	7.9234	13.0907	7.63099	3.02715		6.24975	9.28794	5.70969	2.24214
	7.93647	13.1198	7.64834	3.05949		6.2055	9.28965	5.83286	2.20067
	7.98094	13.1535	7.65378	3.09037		6.13458	9.37146	5.92004	2.15912
	8.04657	13.1605	7.65226	3.08742		6.1143	9.42872	5.96079	2.16348
	8.13664	13.1481	7.64054	2.99441		6.09598	9.46936	5.89931	2.25471
	8.21347	13.1437	7.61363	2.86696		6.07552	9.54402	5.83508	2.34192
	8.2277	13.1455	7.58621	2.80808		6.1812	9.56406	5.8867	2.34133
	8.19254	13.1441	7.58608	2.79568		6.39658	9.50812	5.96051	2.35171
	8.1851	13.1383	7.62389	2.75692		6.56437	9.50389	5.94648	2.52593
	8.21533	13.1131	7.67912	2.7265		6.68177	9.5689	5.89158	2.80254
	8.24732	13.0909	7.71439	2.7507		6.81063	9.59565	5.83355	2.96984
	8.2712	13.1217	7.71195	2.80726		6.85607	9.60943	5.74475	2.92615
	8.27351	13.2066	7.68293	2.88511		6.79005	9.65869	5.69461	2.73968
	8.25168	13.2766	7.65981	2.98015		6.761	9.64726	5.72889	2.54877
	8.2259	13.2857	7.66666	3.01735		6.80131	9.53516	5.73185	2.4901
	8.23098	13.2527	7.69058	2.98229		6.81234	9.42599	5.66402	2.53502
	8.21894	13.2054	7.6948	3.00091		6.83964	9.32942	5.66157	2.54922
	8.20528	13.184	7.67116	3.12649		6.91669	9.19786	5.76263	2.50933
	8.20244	13.2099	7.6473	3.24081		6.88878	9.13672	5.81486	2.56004
	8.23669	13.25	7.66209	3.25717		6.68956	9.20716	5.78618	2.74735
	8.28159	13.2352	7.70687	3.19762		6.47688	9.26616	5.75779	3.00112
	8.31413	13.1705	7.75972	3.08464		6.34422	9.23279	5.74157	3.22151
	8.34534	13.1225	7.79127	2.96777		6.27562	9.20084	5.74099	3.32115
	8.35913	13.1218	7.79642	2.94014		6.3236	9.18487	5.79127	3.25753
	8.38963	13.1539	7.79775	2.98332		6.44202	9.12094	5.80392	3.14261
	8.47456	13.182	7.81684	3.0126		6.45568	9.07505	5.6812	3.12627
	8.57498	13.1716	7.84985	3.06061		6.35755	9.10273	5.55684	3.20313
	8.60326	13.1161	7.87543	3.18859		6.31758	9.13365	5.55412	3.25561
	8.53647	13.0861	7.86973	3.31456		6.35393	9.17324	5.60369	3.21111
	8.43668	13.1241	7.84473	3.35356		6.36492	9.30289	5.61631	3.12269
	8.35586	13.1758	7.83367	3.33569		6.38107	9.4266	5.61966	3.07226
	8.34044	13.1765	7.84958	3.27715		6.4253	9.39884	5.60464	3.10177
	8.39179	13.143	7.864	3.17053		6.41991	9.2841	5.56289	3.20348
	8.47155	13.1242	7.83196	3.09122		6.37555	9.16821	5.60013	3.30961
	8.53596	13.1289	7.7533	3.10535		6.40321	9.0339	5.67278	3.33978
	8.59511	13.155	7.68177	3.13717		6.45176	8.93808	5.77747	3.31867
	8.67439	13.179	7.67179	3.14137		6.40366	8.97717	5.76244	3.31854
	8.73811	13.1711	7.71788	3.18097		6.34373	9.04428	5.69453	3.28078
	8.7717	13.157	7.77373	3.25591		6.37623	9.02738	5.62193	3.23844
	8.79318	13.1935	7.79881	3.28584		6.45479	9.02204	5.54761	3.16852
	8.81278	13.2689	7.79025	3.2711		6.5425	9.07621	5.52755	3.12544
	8.81052	13.3256	7.78431	3.24311		6.68738	9.07862	5.61912	3.15382
	8.80368	13.363	7.79843	3.18042		6.82031	9.01509	5.65294	3.26428
	8.79688	13.3915	7.8151	3.1405		6.86503	8.97305	5.63059	3.38625
	8.75866	13.4035	7.80712	3.22984		6.92409	8.89931	5.67754	3.37115
	8.71044	13.4048	7.78013	3.38634		7.00711	8.83273	5.7649	3.24049
	8.70225	13.4214	7.76331	3.45969		6.9722	8.86029	5.82003	3.14266
	8.74385	13.4396	7.7695	3.43853		6.8486	8.98287	5.89099	3.15493
	8.77804	13.4367	7.78484	3.38978		6.81082	9.04323	5.9884	3.1943
	8.77987	13.4367	7.78682	3.3244		6.84594	9.02717	6.01759	3.18314
	8.74598	13.451	7.77329	3.28501		6.86703	9.02433	5.96421	3.12257
	8.68724	13.4664	7.76711	3.32083		6.91068	8.98934	5.90176	3.03622
	8.6397	13.4772	7.80649	3.35861		6.92	8.91308	5.77964	2.98994
	8.6348	13.5015	7.88868	3.33036		6.78662	8.90562	5.57399	3.03447
	8.65595	13.5239	7.96449	3.32443		6.63452	8.94339	5.41951	3.11028
	8.65176	13.5278	7.99323	3.40192		6.62935	8.90954	5.40968	3.14889
	8.6389	13.5257	7.98315	3.46006		6.65653	8.86648	5.47492	3.20807
	8.64152	13.5142	7.96656	3.42448		6.59846	8.92042	5.57076	3.3295
	8.64665	13.4771	7.96534	3.33312		6.54659	8.98944	5.69631	3.44409
	8.63077	13.4277	7.98262	3.23203		6.53409	9.01704	5.75481	3.51259
	8.60272	13.4011	7.99177	3.18581		6.50198	9.06668	5.72192	3.54441
	8.554	13.3921	7.97922	3.27664		6.49983	9.1152	5.72467	3.52351
	8.50717	13.3883	7.97076	3.43249		6.55296	9.0767	5.79308	3.47966
	8.54293	13.3982	7.99584	3.47942		6.48416	9.01672	5.82121	3.49362
	8.65258	13.4244	8.04422	3.40219		6.26413	9.00007	5.79662	3.54129
	8.75306	13.4563	8.07164	3.32494		6.09663	8.94117	5.76183	3.50021
	8.79105	13.4963	8.04994	3.30148		6.05841	8.83766	5.65801	3.36628
	8.79138	13.5498	7.99498	3.32303		6.05604	8.81359	5.49668	3.24728
	8.77404	13.5767	7.95883	3.3802		6.08451	8.85274	5.39151	3.22669
	8.75314	13.5581	7.97828	3.41152		6.12018	8.84348	5.36996	3.27937
	8.76058	13.522	8.03652	3.36659		6.0361	8.82014	5.37899	3.36425
	8.7833	13.4998	8.07155	3.33164		5.8672	8.83636	5.47769	3.37808
	8.80234	13.4853	8.04984	3.3864		5.7803	8.83	5.68738	3.27371
	8.82177	13.4736	8.00427	3.4393		5.76902	8.82028	5.84763	3.1849
	8.8604	13.4738	7.98638	3.38413		5.73411	8.90876	5.83137	3.2618
	8.87658	13.4675	8.00902	3.27155		5.74168	9.04397	5.71271	3.44611
	8.85147	13.4581	8.05283	3.18516		5.84008	9.11468	5.59492	3.59419
	8.8256	13.4725	8.09293	3.16224		5.91553	9.17769	5.47738	3.66225
	8.81088	13.5087	8.11229	3.24641		5.92583	9.26917	5.44784	3.65391
	8.79343	13.5243	8.12868	3.39884		5.9245	9.28611	5.49315	3.59866
	8.78096	13.5193	8.16277	3.46128		5.85781	9.22211	5.4865	3.57322
	8.78949	13.5213	8.20452	3.38488		5.68109	9.18231	5.4044	3.59103
	8.76859	13.5228	8.23047	3.30518		5.55714	9.15051	5.37417	3.58919
	8.71003	13.5196	8.23292	3.27667		5.5753	9.07257	5.39852	3.56802
	8.65718	13.531	8.23011	3.29175		5.60565	9.04214	5.38218	3.57065
	8.62852	13.5402	8.24624	3.31353		5.58216	9.08325	5.35657	3.53936
	8.61866	13.4994	8.29047	3.36246		5.57066	9.0785	5.35848	3.40571
	8.62449	13.4205	8.33689	3.40929		5.5684	9.03209	5.33585	3.2358
	8.64923	13.3462	8.3521	3.47189		5.55434	9.05987	5.3028	3.16052
	8.66877	13.2958	8.34122	3.58331		5.60662	9.11906	5.32411	3.21536
	8.70491	13.2961	8.34061	3.65082		5.67576	9.13173	5.33125	3.35506
	8.77476	13.3539	8.37269	3.57296		5.60768	9.16671	5.23329	3.5249
	8.8434	13.4189	8.4188	3.43369		5.4584	9.22168	5.14084	3.60174
	8.85446	13.4302	8.45288	3.37344		5.42322	9.18506	5.14319	3.52233
	8.81171	13.4163	8.46043	3.39523		5.49164	9.10316	5.17017	3.38261
	8.7645	13.4178	8.45503	3.45363		5.51761	9.10682	5.16805	3.31594
	8.73056	13.4261	8.45497	3.52751		5.47538	9.13563	5.17641	3.32224
	8.74286	13.44	8.45508	3.55876		5.3597	9.10611	5.15821	3.40546
	8.80928	13.4727	8.43031	3.53666		5.16869	9.09427	5.09391	3.56431
	8.89377	13.5	8.37451	3.56298		5.04053	9.10455	5.10765	3.73529
	8.94885	13.5032	8.32406	3.6616		5.10549	9.04586	5.21186	3.8425
	8.98771	13.5185	8.31265	3.70754		5.24337	8.97046	5.25772	3.86825
	9.01995	13.5455	8.34471	3.66625		5.29819	8.93719	5.21258	3.7931
	9.01422	13.5532	8.38899	3.63636		5.34498	8.96541	5.17615	3.62547
	8.96776	13.5528	8.40905	3.64935		5.42428	8.94819	5.12525	3.47281
	8.88776	13.5746	8.39588	3.67141		5.45188	8.99573	5.03484	3.41738
	8.78862	13.5962	8.36814	3.69537		5.45422	9.10503	4.99052	3.4236
	8.69923	13.5968	8.38944	3.68705		5.4918	9.16398	4.98689	3.41055
	8.68645	13.6068	8.43429	3.58836		5.47865	9.20651	4.93796	3.35344
	8.76183	13.6343	8.47227	3.47102		5.41644	9.29827	4.88758	3.28046
	8.86639	13.6572	8.47926	3.44634		5.46297	9.33774	4.94028	3.22082
	8.95391	13.6642	8.47362	3.47517		5.57149	9.3005	5.04701	3.23637
	9.01099	13.6552	8.48787	3.46386		5.54466	9.29664	5.12518	3.36093
	9.03198	13.6195	8.51855	3.43668		5.39508	9.3073	5.1838	3.51964
	8.99671	13.5788	8.5298	3.43181		5.26668	9.24689	5.18688	3.6292
	8.93769	13.5834	8.49392	3.42351		5.18395	9.20024	5.08608	3.69108
	8.8774	13.6171	8.42538	3.43355		5.17453	9.23588	4.97654	3.72084
	8.81797	13.6352	8.37523	3.47887		5.30191	9.24449	4.96119	3.70922
	8.78905	13.6346	8.392	3.47474		5.44784	9.19338	4.94296	3.70425
	8.82445	13.6447	8.4559	3.39781		5.46019	9.17218	4.87074	3.71901
	8.89036	13.6555	8.49899	3.36671		5.42354	9.16885	4.85316	3.70879
	8.9303	13.6621	8.48475	3.42378		5.44381	9.14349	4.92861	3.62844
	8.96073	13.6809	8.44726	3.47846		5.42399	9.18086	5.04312	3.52577
	8.98358	13.7152	8.44601	3.50594		5.34142	9.29721	5.19689	3.44837
	8.9879	13.7582	8.50287	3.54446		5.32384	9.34291	5.33854	3.41188
	8.97416	13.8092	8.58638	3.57747		5.36288	9.29305	5.30028	3.40277
	8.94958	13.8554	8.63779	3.6117		5.37919	9.26775	5.1601	3.41929
	8.899	13.854	8.62892	3.7		5.43473	9.26073	5.03449	3.47959
	8.83616	13.8111	8.58433	3.79448		5.52695	9.19848	4.97826	3.59765
	8.81973	13.7688	8.55168	3.80378		5.51414	9.14627	4.93168	3.76634
	8.84493	13.7568	8.53959	3.77397		5.42221	9.14335	4.92546	3.87918
	8.86831	13.7874	8.52451	3.77884		5.39838	9.10657	4.98601	3.79949
	8.85899	13.863	8.48862	3.76859		5.42474	9.0614	5.03646	3.59095
	8.82333	13.9567	8.44091	3.69849		5.41191	9.09373	5.04393	3.42041
	8.74836	14.0054	8.4183	3.62453		5.39616	9.1313	5.04196	3.31676
	8.65337	13.9946	8.4506	3.5535		5.3748	9.09388	4.9948	3.22595
	8.59612	13.9643	8.52898	3.46728		5.28628	9.08395	4.87825	3.15776
	8.56727	13.9478	8.60846	3.42373		5.21975	9.13728	4.82097	3.09775
	8.53331	13.9529	8.65668	3.44168		5.26858	9.14327	4.89586	3.03354
	8.50443	13.9905	8.67501	3.42657		5.3118	9.11403	4.99588	3.01896
	8.52176	14.0503	8.68081	3.36828		5.2229	9.1452	5.06436	3.07285
	8.56188	14.0844	8.69962	3.36718		5.12435	9.17406	5.14561	3.1422
	8.61165	14.0801	8.73204	3.41828		5.13676	9.13094	5.22342	3.17763
	8.63033	14.0558	8.75501	3.43733		5.21107	9.11372	5.24209	3.17686
	8.67358	14.0309	8.74623	3.42509		5.29021	9.15574	5.26231	3.11779
	8.66611	14.0113	8.71696	3.40476		5.33674	9.16157	5.28703	3.02166
	8.6444	14.0316	8.68792	3.36046		5.28135	9.14945	5.24325	2.95186
	8.63878	14.1007	8.66587	3.35557		5.17066	9.19649	5.17485	2.94842
	8.618	14.1683	8.64311	3.46171		5.20504	9.22181	5.19358	2.93175
	8.58882	14.2047	8.62977	3.57422		5.38854	9.16117	5.25036	2.85404
	8.57717	14.2149	8.63419	3.56033		5.49991	9.11759	5.22795	2.7692
	8.58482	14.2034	8.66649	3.47561		5.45078	9.10485	5.16814	2.68669
	8.60426	14.1851	8.72746	3.42358		5.32794	9.04565	5.11545	2.57189
	8.63829	14.2066	8.79419	3.40757		5.18824	9.01344	5.02547	2.484
	8.67995	14.254	8.84641	3.43256		5.09242	9.09643	4.92034	2.46652
	8.68275	14.2633	8.88756	3.51852		5.15099	9.16419	4.88494	2.48498
	8.65796	14.2345	8.92908	3.59076		5.29452	9.1102	4.87962	2.54195
	8.64763	14.2244	8.9715	3.60917		5.33814	9.03297	4.86638	2.63435
	8.66086	14.2441	9.00878	3.64564		5.30212	8.96739	4.92926	2.65319
	8.67578	14.2647	9.03792	3.7162		5.31044	8.87583	5.04563	2.57637
	8.70061	14.281	9.05664	3.74237		5.30818	8.84064	5.08292	2.52346
	8.74053	14.2781	9.07834	3.73821		5.23275	8.91532	5.02362	2.56113
	8.7617	14.2575	9.12031	3.75564		5.18997	8.95867	4.9735	2.64407
	8.76955	14.2655	9.17844	3.74567		5.17406	8.91992	4.9168	2.73386
	8.76696	14.3246	9.22991	3.67167		5.08349	8.91451	4.87993	2.79674
	8.74432	14.3822	9.25131	3.59738		4.98888	8.92278	4.96677	2.79761
	8.69855	14.3906	9.24446	3.53897		4.97904	8.8461	5.10019	2.7767
	8.67634	14.3789	9.21182	3.45309		4.97687	8.75929	5.11306	2.81131
	8.69913	14.358	9.20931	3.39411		4.98567	8.74282	5.00992	2.89181
	8.7336	14.3261	9.2024	3.43725		5.11686	8.71771	4.92232	2.91763
	8.75522	14.3071	9.19016	3.52701		5.29122	8.68519	4.86417	2.88619
	8.74599	14.3206	9.17131	3.58932		5.35942	8.73996	4.83808	2.83405
	8.69624	14.3297	9.14909	3.63997		5.35432	8.81141	4.87857	2.75449
	8.61277	14.3123	9.13622	3.68273		5.33063	8.79485	4.90305	2.66176
	8.55925	14.2958	9.13797	3.69709		5.24286	8.76738	4.81478	2.60901
	8.55152	14.2964	9.15113	3.73725		5.17306	8.78583	4.71246	2.58215
	8.55382	14.3301	9.16872	3.82582		5.26176	8.74973	4.7241	2.58356
	8.56295	14.4102	9.19207	3.87063		5.40156	8.65965	4.78492	2.67272
	8.59626	14.5029	9.21708	3.83949		5.4005	8.61466	4.83175	2.79296
	8.6328	14.5248	9.23398	3.80525		5.3015	8.58807	4.87255	2.82361
	8.64579	14.4679	9.22649	3.78801		5.22449	8.54533	4.84117	2.78201
	8.66562	14.3991	9.1833	3.75226		5.17996	8.57521	4.7067	2.77392
	8.67907	14.3556	9.10972	3.73592		5.22672	8.67106	4.61556	2.82417
	8.66448	14.3454	9.04954	3.76017		5.40658	8.67767	4.65528	2.88336
	8.63975	14.3642	9.03766	3.75891		5.55442	8.59503	4.7152	2.93475
	8.60997	14.3856	9.08191	3.71051		5.53511	8.55464	4.73801	2.97073
	8.59291	14.363	9.14713	3.69267		5.48125	8.55753	4.78016	3.00345
	8.55594	14.3052	9.17997	3.70666		5.49471	8.50522	4.83875	3.03091
	8.53925	14.261	9.20601	3.69974		5.48946	8.5404	4.87478	3.05586
	8.5247	14.2445	9.21772	3.70197		5.46142	8.63444	4.92269	3.05015
	8.48954	14.245	9.21473	3.76432		5.46098	8.65626	4.96702	2.98099
	8.43829	14.2573	9.25281	3.82412		5.43345	8.62136	4.90066	2.87987
	8.39233	14.2727	9.28987	3.85044		5.35572	8.62619	4.77985	2.78389
	8.33845	14.2573	9.31345	3.89698		5.33715	8.60899	4.75485	2.70776
	8.28119	14.2331	9.31807	3.95098		5.36745	8.51186	4.80476	2.67004
	8.25945	14.239	9.31014	3.97721		5.32115	8.44477	4.81279	2.69907
	8.25906	14.2598	9.30052	4.02092		5.24928	8.44412	4.82349	2.74675
	8.25347	14.2585	9.29467	4.07319		5.26055	8.42002	4.87389	2.77433
	8.2392	14.2461	9.28222	4.03887		5.28787	8.40049	4.90534	2.79874
	8.22917	14.2419	9.2564	3.93971		5.2347	8.43655	4.9295	2.83669
	8.20752	14.2315	9.23083	3.88293		5.17102	8.42806	4.96587	2.86638
	8.19959	14.2208	9.21929	3.86027		5.13214	8.33494	4.92478	2.87999
	8.22888	14.2252	9.20827	3.82758		5.07039	8.29829	4.79112	2.89818
	8.24611	14.2339	9.19082	3.83426		5.04856	8.33883	4.65985	2.91866
	8.22229	14.2313	9.17055	3.89644		5.11006	8.33658	4.75039	2.92109
	8.18632	14.2301	9.14432	3.95422		5.13254	8.30381	4.83502	2.91159
	8.18047	14.2218	9.11387	4.01316		5.05983	8.31549	4.87137	2.90191
	8.18793	14.1735	9.10882	4.12145		5.03799	8.31929	4.90782	2.88666
	8.19919	14.106	9.15701	4.20843		5.13207	8.29584	4.92723	2.86978
	8.20745	14.0595	9.22462	4.22053		5.27613	8.33933	4.92577	2.89791
	8.19118	14.0304	9.26137	4.23071		5.45691	8.39423	4.98356	2.92847
	8.15521	14.0031	9.25465	4.28281		5.61621	8.33715	5.05524	2.89705
	8.13124	13.9957	9.23678	4.31498		5.59878	8.2466	5.01597	2.83023
	8.13748	14.0048	9.23424	4.32003		5.4035	8.21126	4.90832	2.79733
	8.13133	14.0024	9.25206	4.31207		5.25048	8.16419	4.85538	2.79914
	8.1079	13.9965	9.27235	4.22465		5.19992	8.08893	4.83863	2.83412
	8.08246	13.9953	9.27761	4.06595		5.13588	8.10822	4.80936	2.87748
	8.05663	13.9764	9.26025	3.97308		5.05688	8.17375	4.82271	2.84417
	8.03122	13.9333	9.23142	3.98455		5.00955	8.16433	4.84521	2.74453
	8.03231	13.907	9.20581	4.01361		4.93762	8.15067	4.82834	2.70599
	8.05946	13.8954	9.19521	4.03619		4.86036	8.1949	4.85693	2.77563
	8.07343	13.878	9.19542	4.06721		4.91222	8.18875	5.0053	2.83953
	8.09257	13.8665	9.19622	4.06938		5.03766	8.12398	5.16225	2.81912
	8.13682	13.8818	9.19103	4.05526		5.11353	8.11664	5.24935	2.72298
	8.18214	13.9135	9.18194	4.09153		5.22819	8.12837	5.31194	2.60346
	8.18186	13.9555	9.18269	4.13372		5.44509	8.09073	5.32721	2.54125
	8.1361	14.018	9.19481	4.09669		5.63395	8.07865	5.25253	2.60339
	8.06089	14.0639	9.20227	4.04438		5.75255	8.11345	5.16358	2.73088
	7.97616	14.0623	9.19732	4.07506		5.85533	8.09273	5.13328	2.78483
	7.91986	14.047	9.1959	4.13948		5.84482	7.98759	5.10364	2.73846
	7.90397	14.0571	9.20333	4.18052		5.67215	8.05047	5.07612	2.65815
	7.89802	14.0746	9.2104	4.2126		5.49854	8.11399	5.13309	2.55283
	7.87548	14.0756	9.20408	4.21191		5.39152	8.05718	5.21999	2.45045
	7.87939	14.0613	9.18709	4.14585		5.26518	7.97208	5.22635	2.41075
	7.92097	14.0155	9.15421	4.09124		5.15155	7.95139	5.18573	2.43204
	7.95334	13.9484	9.12975	4.08521		5.1489	7.95351	5.16801	2.48843
	7.95566	13.9045	9.13059	4.05455		5.20369	7.98425	5.13013	2.63237
	7.92802	13.8997	9.14671	3.98043		5.25377	8.04389	5.09456	2.81144
	7.87745	13.9001	9.15589	3.93021		5.34644	8.00683	5.13353	2.88765
	7.8331	13.8983	9.15125	3.9106		5.44532	7.84494	5.18033	2.8438
	7.8529	13.9107	9.14187	3.90907		5.43221	7.73927	5.17149	2.77861
	7.90366	13.9226	9.1368	3.961		5.37406	7.77042	5.17975	2.7407
	7.93108	13.9347	9.12942	4.04248		5.38631	7.82445	5.23472	2.74129
	7.93803	13.9595	9.10577	4.05174		5.38168	7.85684	5.23009	2.78246
	7.93796	13.9865	9.04934	3.98261		5.29654	7.89218	5.18581	2.80003
	7.91653	13.9685	8.97358	3.9244		5.26233	7.8765	5.19162	2.75759
	7.86673	13.9104	8.91597	3.88908		5.31507	7.81707	5.20652	2.71067
	7.8139	13.8558	8.91004	3.84466		5.33807	7.83966	5.15273	2.7237
	7.74312	13.8207	8.9576	3.82766		5.31826	7.93558	5.10379	2.74523
	7.66023	13.8046	8.99662	3.84154		5.27071	7.96623	5.11379	2.70399
	7.60234	13.8272	9.04761	3.80842		5.13401	7.95259	5.13584	2.63464
	7.5859	13.8988	9.07522	3.73145		4.96081	7.97837	5.20648	2.5831
	7.57436	13.9847	9.09044	3.69385		4.91056	7.98304	5.37656	2.52323
	7.54846	14.0638	9.10074	3.70523		4.96331	7.92641	5.53329	2.49265
	7.53371	14.1134	9.10461	3.74608		4.98277	7.90041	5.56387	2.48682
	7.51504	14.0966	9.10493	3.85994		5.01084	7.89676	5.53944	2.46775
	7.48694	14.0255	9.11098	4.00073		5.12318	7.83043	5.49529	2.39913
	7.46297	13.9696	9.13148	4.04475		5.21429	7.77973	5.38825	2.29472
	7.44611	13.9644	9.16168	3.99069		5.191	7.83162	5.31387	2.13149
	7.41434	13.9751	9.17754	3.93747		5.13608	7.88755	5.36161	1.92883
	7.40143	13.986	9.1523	3.88789		5.10254	7.88262	5.43586	1.76575
	7.44482	13.9952	9.09289	3.82927		5.05584	7.91171	5.4474	1.70099
	7.49052	13.9947	9.03693	3.80352		5.04676	7.96418	5.46117	1.7293
	7.49529	13.9879	9.02786	3.80132		5.09736	7.95744	5.4732	1.85536
	7.46282	13.9971	9.06887	3.7637		5.11117	7.9548	5.40828	2.04725
	7.42961	14.0107	9.1133	3.737		5.08452	8.00605	5.33883	2.20949
	7.41216	13.9902	9.12103	3.78745		5.13523	7.99859	5.33705	2.24473
	7.42956	13.9645	9.09605	3.85718		5.19557	7.90482	5.34088	2.16549
	7.4559	13.9699	9.07944	3.89035		5.13701	7.84474	5.32921	2.08472
	7.4326	13.988	9.0994	3.93125		5.04366	7.80057	5.40541	2.05881
	7.36503	13.9852	9.15405	3.97453		5.00247	7.69692	5.51576	2.0657
	7.31222	13.9698	9.19613	3.95697		4.95426	7.62475	5.52698	2.05347
	7.31126	13.9328	9.21231	3.90636		4.88781	7.64408	5.47523	1.9576
	7.31796	13.8765	9.19621	3.87848		4.90899	7.65133	5.43436	1.76549
	7.30085	13.8511	9.18074	3.83236		5.00106	7.63443	5.34661	1.59671
	7.24903	13.8692	9.18549	3.76474		5.08254	7.68277	5.22948	1.57149
	7.16888	13.8801	9.2013	3.76521		5.17784	7.70685	5.21342	1.6683
	7.10602	13.8475	9.20721	3.83076		5.2544	7.61664	5.258	1.79024
	7.11414	13.7942	9.19624	3.84605		5.17321	7.5305	5.26294	1.8274
	7.18028	13.7376	9.18407	3.87869		4.98131	7.51486	5.27971	1.7238
	7.22078	13.7	9.18721	3.91626		4.87374	7.47059	5.35768	1.54497
	7.21298	13.7227	9.20593	3.91174		4.82827	7.42489	5.42835	1.4238
	7.17394	13.7878	9.21643	3.88894		4.75523	7.49082	5.47798	1.43408
	7.12998	13.8278	9.19297	3.92821		4.76132	7.5871	5.55234	1.47457
	7.10284	13.8186	9.14964	4.01174		4.89353	7.61842	5.5848	1.61544
	7.10268	13.8055	9.12229	4.04523		5.02685	7.6494	5.54066	1.78723
	7.10586	13.8066	9.12855	4.03321		5.12813	7.68739	5.50898	1.95272
	7.08439	13.8153	9.15654	3.9921		5.20836	7.62925	5.51254	2.03191
	7.07342	13.8312	9.18492	3.89207		5.11122	7.52767	5.45858	2.00822
	7.09474	13.8329	9.19733	3.79301		4.81033	7.51081	5.37785	1.91083
	7.12182	13.7951	9.20018	3.80753		4.52861	7.54116	5.37515	1.76934
	7.11308	13.7473	9.22328	3.89954		4.37739	7.56741	5.399	1.64806
	7.09875	13.7406	9.27408	3.9725		4.31101	7.63799	5.36958	1.62067
	7.10706	13.7658	9.33742	4.03692		4.37139	7.70711	5.334	1.64259
	7.13209	13.8074	9.39442	4.10978		4.58182	7.66455	5.33599	1.63586
	7.17083	13.8594	9.43519	4.12988		4.78144	7.57885	5.32619	1.63524
	7.18552	13.9105	9.45211	4.09426		4.87781	7.56217	5.34441	1.66491
	7.13263	13.9351	9.44055	4.05107		4.96771	7.54905	5.43061	1.67994
	7.03898	13.9507	9.40679	3.97429		5.0639	7.49665	5.48581	1.6649
	7.0011	13.9969	9.36738	3.85425		5.06479	7.50382	5.44256	1.64386
	7.02147	14.0658	9.34128	3.771		5.01226	7.5849	5.38552	1.59655
	7.04373	14.1379	9.3397	3.74524		4.97846	7.64095	5.36441	1.50673
	7.04596	14.2	9.36175	3.71194		4.90441	7.68551	5.3396	1.43095
	7.01568	14.2343	9.38153	3.69817		4.827	7.7466	5.35152	1.42023
	6.95921	14.2252	9.38102	3.77962		4.88749	7.73764	5.42468	1.45869
	6.91662	14.2039	9.36278	3.90822		5.01721	7.65545	5.45323	1.49374
	6.9335	14.2123	9.33239	3.99543		5.0357	7.62854	5.38881	1.49321
	6.97019	14.2448	9.29879	4.0628		4.98388	7.65422	5.35908	1.44367
	6.98808	14.2852	9.27806	4.10321		4.94608	7.62585	5.43729	1.3617
	6.99338	14.3178	9.28198	4.07707		4.87544	7.59792	5.52375	1.33613
	6.99682	14.3105	9.31099	4.04316		4.79924	7.64912	5.57885	1.37183
	6.98639	14.2412	9.37043	4.08006		4.83075	7.70231	5.61405	1.38304
	6.96099	14.1673	9.44518	4.11921		4.94837	7.71	5.58331	1.36507
	6.93961	14.1482	9.49957	4.10982		5.03265	7.70971	5.50916	1.40006
	6.89042	14.1659	9.51258	4.10974		5.07843	7.70383	5.5252	1.46115
	6.8216	14.1753	9.48981	4.13271		5.07728	7.57151	5.60826	1.50548
	6.77361	14.1645	9.45992	4.14019		4.97274	7.44882	5.6056	1.55558
	6.74776	14.1511	9.45587	4.18014		4.83402	7.45432	5.54261	1.58859
	6.69967	14.1399	9.48361	4.2824		4.80824	7.49936	5.49996	1.56964
	6.64128	14.1589	9.50666	4.36529		4.84411	7.53582	5.44736	1.53749
	6.61815	14.2088	9.49383	4.38505		4.80829	7.63612	5.37294	1.50685
	6.61947	14.2538	9.44471	4.38912		4.7837	7.73605	5.36281	1.43624
	6.64238	14.2769	9.39371	4.35829		4.84563	7.72333	5.37006	1.34541
	6.67722	14.2986	9.37597	4.23387		4.86188	7.67089	5.31365	1.29239
	6.6977	14.3162	9.39243	4.08368		4.74306	7.64015	5.27782	1.24819
	6.69165	14.304	9.42449	4.00475		4.56789	7.56402	5.33594	1.15227
	6.70502	14.281	9.44758	3.96937		4.36167	7.47107	5.39638	1.09524
	6.75834	14.2534	9.44518	3.94788		4.16595	7.47901	5.39758	1.09364
	6.8011	14.1859	9.41855	3.97187		4.13834	7.52263	5.41387	1.10406
	6.80195	14.0928	9.39111	4.00058		4.26764	7.50596	5.44343	1.09244
	6.77417	14.0443	9.3841	3.98674		4.35804	7.50427	5.44195	1.07644
	6.75544	14.0567	9.40662	3.98839		4.35248	7.53511	5.46893	1.04673
	6.75047	14.0951	9.45259	4.04556		4.34151	7.4917	5.50659	0.996139
	6.77395	14.1489	9.4899	4.07817		4.30549	7.40963	5.42707	0.969456
	6.81779	14.1897	9.49869	4.06868		4.20617	7.40971	5.2627	0.961116
	6.85012	14.1812	9.48853	4.07029		4.13148	7.42144	5.1956	0.901026
	6.8786	14.134	9.45811	4.08415		4.07559	7.379	5.22545	0.852573
	6.93152	14.093	9.46525	4.09206		3.93696	7.38689	5.26532	0.88632
	6.99595	14.0549	9.46158	4.16174		3.77812	7.4668	5.33764	0.953738
	7.01611	14.0109	9.44796	4.29997		3.7261	7.51508	5.4323	0.98126
	7.00661	13.9916	9.41443	4.40333		3.6786	7.55016	5.46304	0.966212
	6.99586	13.9917	9.47186	4.43774		3.55027	7.62153	5.44694	0.917311
	6.99199	13.975	9.55015	4.47189		3.49218	7.62387	5.45675	0.888674
	7.00174	13.9475	9.61191	4.50648		3.59184	7.53332	5.41319	0.959637
	7.02192	13.9471	9.62727	4.50575		3.76522	7.4919	5.28096	1.09317
	7.02135	13.9643	9.59574	4.50604		3.97616	7.51319	5.19437	1.16308
	6.98114	13.9911	9.55431	4.51269		4.1617	7.48463	5.25294	1.11734
	6.9481	14.0377	9.54162	4.48274		4.13012	7.43991	5.38328	1.02369
	6.94822	14.0812	9.55319	4.40175		3.89087	7.46804	5.51862	0.953214
	6.96608	14.0843	9.56357	4.3327		3.68346	7.50551	5.60438	0.900542
	6.97208	14.0642	9.57004	4.25698		3.58061	7.51643	5.52749	0.841223
	6.96757	14.0503	9.58485	4.15702		3.50053	7.54959	5.28173	0.758461
	6.94647	14.0233	9.6142	4.10062		3.46472	7.5563	5.14827	0.645692
	6.90721	13.9804	9.6439	4.10565		3.48497	7.45357	5.15933	0.544076
	6.84415	13.944	9.65484	4.0994		3.46301	7.34699	5.16574	0.519363
	6.87077	13.9252	9.64516	4.08584		3.41705	7.33719	5.13787	0.549286
	6.87291	13.9233	9.6373	4.113		3.49122	7.35333	5.1678	0.563159
	6.83484	13.9379	9.65597	4.13762		3.66222	7.34277	5.24835	0.562231
	6.80201	13.9555	9.7015	4.10127		3.77481	7.38867	5.35079	0.570948
	6.77154	13.9411	9.74008	4.06269		3.82758	7.46614	5.45611	0.613538
	6.73783	13.9141	9.73701	4.04271		3.85007	7.47884	5.46318	0.69899
	6.72617	13.9102	9.70411	3.99172		3.75516	7.47261	5.30705	0.820688
	6.71893	13.9193	9.67249	3.93347		3.5877	7.48266	5.15811	0.923874
	6.68998	13.9011	9.66541	3.94301		3.50679	7.42253	5.16595	0.963463
	6.65249	13.8596	9.64815	3.98335		3.52026	7.32378	5.24711	0.911214
	6.64266	13.8261	9.64733	4.01987		3.55456	7.33493	5.29801	0.791933
	6.63446	13.8148	9.6261	4.09271		3.67461	7.43405	5.33131	0.682302
	6.61511	13.8452	9.59113	4.16888		3.85959	7.48753	5.35113	0.593147
	6.6016	13.9108	9.5597	4.16004		3.93996	7.51382	5.3339	0.558421
	6.60125	13.9625	9.53377	4.1139		3.88031	7.53933	5.36517	0.578004
	6.60097	13.9572	9.51517	4.10698		3.78887	7.47451	5.43735	0.615741
	6.58325	13.9222	9.49604	4.09759		3.68957	7.34374	5.40197	0.692966
[truncated: 6,107 more rows]

## Sheet: panel_F_right
7.9879
11.9667
7.2387
3.899
