# Supplementary material for: Stimulation of VTA dopamine inputs to LH upregulates orexin neuronal activity in a DRD2-dependent manner
Source: eLife. 2024 Apr 3;12:RP90158. doi: 10.7554/eLife.90158 (PMC10990487; doi:10.7554/eLife.90158)
Supplement: Figure 6—source data 1. [file elife-90158-fig6-data1.xlsx]

## Sheet: panel_C
	2.6505	1.95989	0.751202		0.723599	0.0236939	1.39402
	2.6496	1.95627	0.752923		0.709746	0.0189552	1.38424
	2.64839	1.95233	0.754596		0.695656	0.014449	1.37417
	2.64689	1.94807	0.756215		0.68133	0.0101646	1.36386
	2.6451	1.94348	0.75776		0.666784	0.00612887	1.35329
	2.64302	1.93855	0.759263		0.652039	0.00235912	1.3425
	2.64066	1.93327	0.760722		0.637099	-0.00109764	1.33148
	2.63796	1.92765	0.762138		0.621948	-0.00424185	1.32021
	2.63495	1.92171	0.763503		0.606611	-0.00706465	1.30868
	2.63165	1.91548	0.764808		0.591088	-0.00956544	1.29689
	2.62806	1.90901	0.76606		0.575441	-0.0117614	1.28489
	2.62419	1.90229	0.767267		0.559647	-0.0136658	1.27268
	2.62005	1.89531	0.768465		0.543719	-0.0152984	1.26032
	2.61564	1.8881	0.769635		0.527657	-0.0166814	1.24784
	2.61096	1.88066	0.770771		0.511425	-0.0178159	1.23524
	2.606	1.87306	0.771882		0.495045	-0.0187089	1.22254
	2.60075	1.8653	0.772985		0.478558	-0.0193599	1.20973
	2.59524	1.85738	0.774038		0.461968	-0.0197157	1.19682
	2.5895	1.84932	0.775041		0.445289	-0.0197798	1.18383
	2.58353	1.8411	0.775982		0.428473	-0.0195583	1.17073
	2.57733	1.83276	0.776851		0.41153	-0.0190525	1.15755
	2.57094	1.82433	0.777622		0.394514	-0.0182742	1.14429
	2.5644	1.81582	0.778307		0.377434	-0.0172205	1.13096
	2.55771	1.80728	0.778914		0.360303	-0.0159115	1.11759
	2.55089	1.79868	0.779453		0.34314	-0.0143751	1.10422
	2.54394	1.79002	0.779927		0.325951	-0.0126358	1.09087
	2.53684	1.78137	0.780349		0.30872	-0.0106556	1.07754
	2.52961	1.77271	0.780743		0.29146	-0.00840946	1.06425
	2.52226	1.76408	0.781099		0.274192	-0.00589085	1.05103
	2.51481	1.75546	0.781411		0.256925	-0.00309329	1.03789
	2.50728	1.74685	0.781679		0.23969	-1.99629e-05	1.02484
	2.49968	1.73827	0.781869		0.222482	0.00329208	1.01191
	2.492	1.72974	0.781972		0.205342	0.00682788	0.999072
	2.48426	1.72125	0.781996		0.18829	0.0105544	0.986375
	2.4765	1.71281	0.781943		0.171338	0.0144818	0.973798
	2.46873	1.70445	0.781824		0.154498	0.0186017	0.96137
	2.46093	1.69618	0.781633		0.137789	0.0228933	0.949101
	2.45313	1.68798	0.781358		0.121239	0.0273623	0.937
	2.44532	1.67988	0.780998		0.104846	0.0319973	0.925082
	2.43754	1.67187	0.780565		0.0886198	0.0367946	0.913355
	2.42981	1.66398	0.78006		0.0725763	0.0417111	0.901824
	2.42217	1.65619	0.779503		0.0567296	0.0467465	0.890525
	2.41462	1.64855	0.778879		0.0410705	0.0518911	0.879474
	2.40718	1.64105	0.778202		0.0256256	0.0571383	0.868677
	2.39986	1.63369	0.777476		0.0103918	0.0624879	0.85817
	2.39266	1.62652	0.776737		-0.00460296	0.0679244	0.847946
	2.38561	1.61955	0.775993		-0.0193393	0.0734581	0.838011
	2.3787	1.61278	0.775248		-0.0338105	0.0790821	0.828378
	2.37196	1.60625	0.77449		-0.0479833	0.0847756	0.819062
	2.3654	1.59995	0.773707		-0.0618484	0.0905209	0.81006
	2.35904	1.59389	0.772881		-0.0754059	0.0962852	0.80138
	2.35286	1.58808	0.77198		-0.088666	0.102058	0.793035
	2.34687	1.58255	0.771004		-0.10163	0.107856	0.785044
	2.34107	1.5773	0.769949		-0.114268	0.113641	0.777403
	2.33545	1.57236	0.768826		-0.126571	0.11943	0.770124
	2.33002	1.56768	0.767652		-0.138532	0.125237	0.763226
	2.32476	1.56327	0.766443		-0.150189	0.131064	0.756711
	2.31969	1.55909	0.765209		-0.161546	0.136921	0.750574
	2.31478	1.55515	0.763927		-0.172569	0.142776	0.74484
	2.31001	1.55145	0.762605		-0.183262	0.148598	0.739522
	2.30536	1.54796	0.761236		-0.193639	0.154358	0.734597
	2.30084	1.54471	0.759815		-0.203713	0.160048	0.730072
	2.29647	1.54171	0.758345		-0.21349	0.165686	0.725951
	2.29225	1.53894	0.756828		-0.22295	0.171266	0.722249
	2.28818	1.53639	0.755232		-0.2321	0.17679	0.718946
	2.28423	1.53407	0.753553		-0.240953	0.182219	0.716047
	2.28042	1.532	0.751778		-0.249505	0.187552	0.71356
	2.27669	1.53017	0.749903		-0.257778	0.192784	0.711495
	2.27306	1.52859	0.747932		-0.265769	0.197924	0.70987
	2.26954	1.52725	0.745858		-0.273438	0.202959	0.708641
	2.26613	1.52619	0.743693		-0.280788	0.207912	0.707816
	2.26286	1.52539	0.741452		-0.287818	0.212759	0.707409
	2.25971	1.5248	0.739144		-0.294569	0.217495	0.707432
	2.25669	1.52441	0.736767		-0.301077	0.222112	0.70788
	2.25371	1.52421	0.734303		-0.307349	0.226612	0.70872
	2.2508	1.52417	0.731766		-0.313366	0.231008	0.709948
	2.24797	1.52427	0.72916		-0.31914	0.235275	0.71156
	2.24517	1.52452	0.726485		-0.324649	0.239408	0.713559
	2.2424	1.52488	0.723741		-0.329911	0.243432	0.715932
	2.23965	1.5253	0.720905		-0.334941	0.247374	0.718679
	2.23694	1.52578	0.717959		-0.339748	0.251232	0.721774
	2.2343	1.52633	0.714912		-0.344343	0.254979	0.725202
	2.23172	1.52693	0.711787		-0.348734	0.258602	0.728997
	2.22919	1.52758	0.708585		-0.352918	0.262072	0.733169
	2.2267	1.5283	0.705317		-0.356902	0.265419	0.737686
	2.22418	1.52904	0.701966		-0.360683	0.268636	0.742502
	2.22165	1.52978	0.698526		-0.364222	0.271705	0.747594
	2.21913	1.53049	0.69501		-0.367489	0.274598	0.75296
	2.21663	1.53116	0.691426		-0.370512	0.277379	0.758587
	2.21416	1.53176	0.687781		-0.373311	0.280045	0.764466
	2.21166	1.53229	0.684092		-0.375917	0.282602	0.770599
	2.20911	1.53274	0.680327		-0.378335	0.285046	0.776984
	2.20651	1.5331	0.676464		-0.38055	0.287398	0.783607
	2.20387	1.53337	0.672524		-0.382545	0.289624	0.790445
	2.20117	1.53348	0.668486		-0.384344	0.291711	0.797463
	2.19843	1.53339	0.664337		-0.385941	0.293692	0.804675
	2.1956	1.5331	0.660093		-0.38733	0.295572	0.812086
	2.1927	1.53262	0.655762		-0.388507	0.297316	0.819717
	2.18975	1.53194	0.651368		-0.38946	0.298916	0.827528
	2.18677	1.53106	0.646916		-0.390143	0.300366	0.835489
	2.18375	1.52992	0.642391		-0.390533	0.301652	0.843607
	2.18066	1.5285	0.637819		-0.390632	0.302795	0.851874
	2.1775	1.52681	0.633181		-0.390444	0.303824	0.860283
	2.17428	1.52483	0.62846		-0.389985	0.304789	0.868816
	2.17103	1.52254	0.623689		-0.389213	0.305682	0.877481
	2.16772	1.51996	0.618875		-0.388124	0.30651	0.886275
	2.16438	1.51708	0.614007		-0.386724	0.307265	0.895204
	2.16098	1.51386	0.609074		-0.38502	0.307961	0.904271
	2.15751	1.51027	0.604059		-0.38299	0.308574	0.913462
	2.15396	1.50628	0.598977		-0.380581	0.309122	0.922777
	2.15035	1.50187	0.593845		-0.377791	0.309608	0.932198
	2.14675	1.49708	0.588681		-0.374627	0.310046	0.941683
	2.14315	1.49191	0.583459		-0.371107	0.310423	0.95123
	2.13955	1.48637	0.578137		-0.367228	0.31074	0.960858
	2.13595	1.48044	0.57272		-0.362961	0.310998	0.970588
	2.13232	1.47409	0.567211		-0.358296	0.311196	0.980421
	2.12863	1.46729	0.561634		-0.353174	0.311332	0.990361
	2.12488	1.46006	0.555999		-0.347581	0.311424	1.00039
	2.12108	1.45241	0.5503		-0.341553	0.311473	1.0105
	2.11724	1.4443	0.544554		-0.335103	0.311492	1.02068
	2.11337	1.43574	0.538758		-0.328213	0.311497	1.03092
	2.10946	1.42669	0.532912		-0.320877	0.311484	1.04119
	2.1055	1.41715	0.527041		-0.313128	0.311434	1.05149
	2.10154	1.40712	0.521156		-0.304967	0.311369	1.0618
	2.09757	1.39659	0.51526		-0.296383	0.311281	1.07213
	2.0936	1.38557	0.509318		-0.287386	0.311202	1.08246
	2.08964	1.37408	0.503313		-0.277961	0.311115	1.0928
	2.08566	1.3621	0.49723		-0.268112	0.311018	1.10314
	2.08163	1.3496	0.491103		-0.25781	0.310917	1.11344
	2.07756	1.33658	0.484948		-0.247062	0.310823	1.12367
	2.07346	1.32309	0.478765		-0.235903	0.310748	1.13384
	2.06939	1.30916	0.472571		-0.224318	0.310684	1.14394
	2.06537	1.29476	0.466369		-0.212334	0.310637	1.15393
	2.06139	1.27992	0.460172		-0.199915	0.310584	1.16382
	2.05743	1.26463	0.454		-0.187078	0.310524	1.17358
	2.05348	1.2489	0.447869		-0.173826	0.310434	1.18321
	2.04953	1.23275	0.441777		-0.160181	0.310341	1.1927
	2.0456	1.2162	0.435747		-0.146176	0.310258	1.20209
	2.04174	1.19931	0.429761		-0.131793	0.310171	1.21133
	2.03795	1.18206	0.423811		-0.117019	0.310112	1.22043
	2.03427	1.16446	0.41789		-0.101817	0.310089	1.22933
	2.03066	1.14652	0.412007		-0.0861564	0.310104	1.23808
	2.02713	1.12827	0.406177		-0.0700545	0.310155	1.24666
	2.0237	1.10972	0.400424		-0.053531	0.310233	1.25506
	2.02041	1.09088	0.394778		-0.0365771	0.310325	1.26329
	2.01728	1.07175	0.389227		-0.0192211	0.310448	1.27132
	2.01429	1.05237	0.383802		-0.00145957	0.310596	1.27915
	2.01143	1.03273	0.378489		0.0167072	0.310759	1.28678
	2.0087	1.01285	0.373289		0.0353017	0.310908	1.2942
	2.00612	0.992742	0.368188		0.054311	0.311076	1.30141
	2.00371	0.972465	0.363188		0.0737257	0.311243	1.3084
	2.00147	0.952074	0.358293		0.0935451	0.311458	1.31515
	1.99938	0.931598	0.353511		0.113747	0.311727	1.32164
	1.9975	0.91105	0.34887		0.134307	0.312042	1.32785
	1.99585	0.890442	0.344376		0.155191	0.312393	1.33382
	1.99445	0.869818	0.340026		0.176397	0.312764	1.33956
	1.99329	0.849209	0.335811		0.197915	0.313166	1.3451
	1.99236	0.828695	0.33174		0.219763	0.31357	1.35044
	1.99167	0.808255	0.327838		0.241943	0.313973	1.35556
	1.99124	0.787903	0.324094		0.264433	0.314364	1.36042
	1.9911	0.76766	0.320509		0.287223	0.314737	1.36502
	1.99125	0.747567	0.317072		0.310313	0.315138	1.36938
	1.99168	0.727632	0.313793		0.333691	0.315549	1.37347
	1.99242	0.707893	0.3107		0.35736	0.315954	1.3773
	1.99349	0.688413	0.307806		0.381283	0.316348	1.38087
	1.99484	0.669236	0.305111		0.405456	0.316732	1.38415
	1.99652	0.650379	0.302615		0.42985	0.317088	1.38716
	1.99855	0.631842	0.300303		0.454442	0.317416	1.38989
	2.00093	0.613637	0.298202		0.479197	0.3177	1.39232
	2.00364	0.595797	0.29628		0.504092	0.317949	1.39447
	2.00666	0.57839	0.294546		0.529112	0.318147	1.39635
	2.00997	0.561426	0.293011		0.554237	0.318252	1.39795
	2.01362	0.544908	0.291692		0.579461	0.318235	1.39925
	2.0176	0.52887	0.290573		0.604765	0.318095	1.40028
	2.02194	0.513294	0.289666		0.630078	0.31784	1.40101
	2.02665	0.498178	0.288959		0.655372	0.317474	1.40144
	2.03173	0.483528	0.288455		0.680612	0.317008	1.40156
	2.03718	0.469335	0.288158		0.705748	0.316443	1.40141
	2.04295	0.455662	0.288065		0.730744	0.315754	1.40099
	2.04903	0.442515	0.288178		0.755568	0.314925	1.4003
	2.05537	0.429934	0.288473		0.780216	0.313941	1.39934
	2.06198	0.41793	0.288993		0.80467	0.312802	1.39812
	2.06882	0.406538	0.289745		0.828906	0.311493	1.39668
	2.07588	0.395786	0.290715		0.85287	0.310013	1.39503
	2.08316	0.385674	0.29189		0.876554	0.308365	1.39319
	2.09066	0.376198	0.293258		0.899934	0.306512	1.39116
	2.0984	0.367314	0.294844		0.92295	0.304463	1.38892
	2.10638	0.359015	0.296639		0.945559	0.302236	1.38647
	2.11457	0.351351	0.298608		0.967736	0.299844	1.38381
	2.123	0.344337	0.300737		0.989491	0.297292	1.38092
	2.13163	0.337992	0.303028		1.01082	0.294579	1.37778
	2.14047	0.332289	0.305498		1.03171	0.291698	1.37441
	2.1495	0.327197	0.308144		1.0521	0.288651	1.37083
	2.1587	0.322756	0.310942		1.07196	0.285411	1.36705
	2.16805	0.318951	0.313866		1.0913	0.281949	1.3631
	2.17752	0.31575	0.316924		1.11011	0.278227	1.35899
	2.18711	0.313145	0.320096		1.12835	0.274283	1.35469
	2.19685	0.311136	0.32339		1.14601	0.270159	1.35021
	2.20674	0.309712	0.326813		1.16307	0.26586	1.3456
	2.21678	0.308854	0.330373		1.17953	0.261384	1.34089
	2.22694	0.308567	0.334085		1.19537	0.256744	1.33611
	2.23723	0.308897	0.337925		1.21059	0.251943	1.33126
	2.24765	0.309815	0.341881		1.22521	0.246959	1.32632
	2.25815	0.311312	0.345949		1.23919	0.241798	1.3213
	2.26873	0.313367	0.350107		1.25256	0.236445	1.31622
	2.27936	0.315973	0.354382		1.26529	0.23091	1.31113
	2.29001	0.319099	0.358773		1.27738	0.225179	1.30604
	2.30067	0.322745	0.363282		1.28882	0.219268	1.30095
	2.31134	0.326914	0.367909		1.29962	0.213199	1.29583
	2.32202	0.331603	0.372647		1.30976	0.206995	1.29068
	2.33267	0.336848	0.377491		1.31925	0.200651	1.28554
	2.34327	0.342677	0.382419		1.32812	0.194141	1.28043
	2.3538	0.349072	0.38742		1.33638	0.187476	1.27538
	2.36424	0.356037	0.3925		1.34401	0.180666	1.27042
	2.37462	0.363527	0.397661		1.35102	0.173702	1.26554
	2.38494	0.371541	0.402878		1.35737	0.166623	1.26071
	2.39517	0.380066	0.408159		1.36306	0.159431	1.25593
	2.4053	0.389093	0.413474		1.36809	0.152139	1.25119
	2.41528	0.398601	0.418832		1.37244	0.144747	1.24651
	2.42512	0.408553	0.424229		1.37614	0.137274	1.24196
	2.43484	0.418955	0.429649		1.3792	0.129732	1.23756
	2.44442	0.42983	0.435101		1.38162	0.122109	1.23332
	2.45382	0.441183	0.440576		1.3834	0.114426	1.22921
	2.46303	0.452989	0.446053		1.38451	0.106691	1.22526
	2.47203	0.465231	0.451522		1.38498	0.098888	1.22148
	2.48081	0.477888	0.456978		1.38479	0.0910205	1.21783
	2.48937	0.490921	0.462454		1.38396	0.0830935	1.21432
	2.49773	0.504289	0.467928		1.38251	0.0751401	1.21096
	2.50588	0.517987	0.47338		1.38043	0.0671615	1.20774
	2.51377	0.532023	0.478779		1.37772	0.0591622	1.2047
	2.5214	0.546383	0.484123		1.37439	0.0511263	1.2018
	2.52876	0.561061	0.489432		1.37042	0.043082	1.19904
	2.53585	0.57603	0.494683		1.36582	0.0350816	1.19642
	2.54263	0.591294	0.499878		1.36065	0.0271223	1.19398
	2.54908	0.606803	0.504991		1.35493	0.0192097	1.19172
	2.55517	0.622503	0.510017		1.34868	0.011317	1.18962
	2.56089	0.638361	0.514946		1.34191	0.00347088	1.18767
	2.56626	0.654407	0.519749		1.33462	-0.00433031	1.18589
	2.57127	0.670622	0.524415		1.32688	-0.0120715	1.18426
	2.5759	0.687022	0.528922		1.31867	-0.0197438	1.18278
	2.58013	0.703582	0.533286		1.31004	-0.0273515	1.18144
	2.58397	0.720239	0.537524		1.30104	-0.0349091	1.18021
	2.58741	0.736974	0.541635		1.29167	-0.042393	1.17911
	2.59049	0.753771	0.545625		1.28198	-0.0497621	1.17813
	2.59318	0.770615	0.549477		1.27196	-0.057015	1.1773
	2.59548	0.787449	0.553177		1.26168	-0.0641397	1.17661
	2.5974	0.804252	0.556696		1.25116	-0.0711367	1.17605
	2.59894	0.820994	0.560015		1.24042	-0.0780012	1.17566
	2.60006	0.837666	0.56313		1.22947	-0.0847386	1.17542
	2.60081	0.854228	0.566042		1.21833	-0.0913402	1.17534
	2.60121	0.870673	0.568722		1.20706	-0.097823	1.17536
	2.60125	0.887008	0.571145		1.19571	-0.104175	1.17546
	2.60097	0.903212	0.573327		1.18433	-0.110405	1.17565
	2.60037	0.919262	0.575267		1.17295	-0.116472	1.17594
	2.59943	0.935181	0.576938		1.16161	-0.122361	1.17633
	2.59817	0.950978	0.578336		1.15035	-0.128015	1.17684
	2.59659	0.96667	0.579439		1.13921	-0.133428	1.17747
	2.59469	0.982247	0.580229		1.12821	-0.138609	1.17819
	2.59249	0.997648	0.580727		1.11732	-0.143556	1.17898
	2.59003	1.01284	0.58093		1.10659	-0.148251	1.17987
	2.58733	1.02782	0.580858		1.09603	-0.152688	1.1809
	2.58438	1.04259	0.580492		1.08568	-0.15685	1.18206
	2.58118	1.05714	0.579817		1.07554	-0.160716	1.18332
	2.57775	1.07145	0.578826		1.06563	-0.164283	1.18469
	2.57409	1.08549	0.577518		1.05597	-0.167562	1.18615
	2.5702	1.09931	0.575895		1.04657	-0.170547	1.1877
	2.56607	1.11289	0.573972		1.03744	-0.173239	1.18931
	2.56171	1.12623	0.571757		1.02859	-0.175617	1.19096
	2.55718	1.13933	0.569248		1.02003	-0.177665	1.19265
	2.55248	1.15216	0.566432		1.01178	-0.179383	1.19435
	2.54765	1.16472	0.563325		1.00386	-0.180772	1.19606
	2.54268	1.17701	0.559935		0.996284	-0.181817	1.19774
	2.53753	1.18905	0.556257		0.989088	-0.182502	1.19939
	2.53222	1.20082	0.552257		0.982265	-0.182811	1.20101
	2.52678	1.2123	0.547918		0.975804	-0.182756	1.20261
	2.52118	1.22348	0.543251		0.969707	-0.182302	1.20418
	2.51546	1.2344	0.538283		0.964	-0.181463	1.2057
	2.50961	1.2451	0.533005		0.958703	-0.180226	1.20715
	2.5037	1.25559	0.527407		0.953822	-0.178585	1.2085
	2.49777	1.26581	0.521506		0.949328	-0.176526	1.20974
	2.49181	1.27581	0.515311		0.945272	-0.174074	1.21086
	2.48581	1.28557	0.508849		0.941627	-0.171255	1.21184
	2.4798	1.29511	0.502106		0.938415	-0.168072	1.21269
	2.47376	1.30442	0.495092		0.93562	-0.164536	1.21339
	2.46773	1.31352	0.487809		0.933228	-0.160642	1.21394
	2.46171	1.32236	0.480272		0.931192	-0.156342	1.21431
	2.45569	1.33094	0.472489		0.929542	-0.151591	1.21451
	2.44972	1.33932	0.464477		0.928321	-0.146436	1.21453
	2.44377	1.34749	0.45623		0.927513	-0.140929	1.21436
	2.43791	1.35548	0.447739		0.927072	-0.135087	1.21399
	2.43215	1.36331	0.439007		0.926979	-0.128878	1.21341
	2.42649	1.37098	0.430062		0.927239	-0.122306	1.2126
	2.42091	1.37849	0.420917		0.927861	-0.115382	1.21155
	2.41544	1.38583	0.411563		0.928835	-0.108126	1.21026
	2.41008	1.393	0.402		0.930174	-0.100492	1.20874
	2.40487	1.40001	0.39223		0.931862	-0.0925068	1.20694
	2.39979	1.40683	0.382258		0.93391	-0.08418	1.20487
	2.39484	1.41348	0.372082		0.936312	-0.0755493	1.2025
	2.38998	1.41996	0.36174		0.939057	-0.0666028	1.19982
	2.38525	1.42629	0.351255		0.942134	-0.0573606	1.19681
	2.38065	1.43248	0.34063		0.945552	-0.0478217	1.19346
	2.37621	1.43855	0.329882		0.949289	-0.0379767	1.18976
	2.37196	1.4445	0.319009		0.953321	-0.0278441	1.18571
	2.36792	1.45033	0.308049		0.957631	-0.0174579	1.18131
	2.36405	1.45601	0.297021		0.962171	-0.00683787	1.17656
	2.3603	1.46157	0.28594		0.966928	0.00399031	1.17147
	2.3567	1.46701	0.274826		0.971875	0.0150245	1.16604
	2.35324	1.47237	0.26369		0.976984	0.0262395	1.16031
	2.34991	1.47766	0.252556		0.982252	0.0376205	1.15425
	2.34672	1.48289	0.241426		0.987684	0.0491436	1.14788
	2.34364	1.48803	0.230314		0.993245	0.0608065	1.1412
	2.34068	1.49309	0.219247		0.998915	0.0726494	1.13424
	2.33785	1.49805	0.20825		1.00468	0.0846685	1.12699
	2.33518	1.50292	0.197358		1.01049	0.0968489	1.11945
	2.33265	1.50768	0.186578		1.01629	0.109143	1.11161
	2.33027	1.51234	0.175925		1.02209	0.121535	1.1035
	2.32802	1.51688	0.16539		1.02786	0.134027	1.09513
	2.32593	1.52133	0.155032		1.03356	0.146583	1.08652
	2.32395	1.5257	0.144875		1.03919	0.159171	1.07766
	2.32208	1.52999	0.134928		1.04475	0.171769	1.06857
	2.32032	1.5342	0.12522		1.05022	0.184389	1.05925
	2.31866	1.53833	0.115772		1.05557	0.19702	1.04974
	2.31714	1.54234	0.106575		1.06076	0.209655	1.04009
	2.31576	1.54627	0.0976604		1.06578	0.222277	1.0303
	2.31451	1.55008	0.0890293		1.07063	0.234871	1.02036
	2.31338	1.55381	0.0806821		1.0753	0.24743	1.01032
	2.31239	1.55743	0.0726323		1.07973	0.259951	1.00016
	2.31154	1.56094	0.0649217		1.0839	0.272433	0.989908
	2.31088	1.56433	0.0575831		1.08782	0.284864	0.979561
	2.3104	1.56763	0.0506313		1.09145	0.297223	0.969143
	2.31009	1.57084	0.0440529		1.09482	0.309475	0.958672
	2.30992	1.57397	0.0378317		1.09787	0.321603	0.94817
	2.30985	1.57702	0.0319645		1.1006	0.333605	0.937675
	2.30987	1.57998	0.026465		1.10298	0.345467	0.927192
	2.30998	1.58282	0.0213204		1.10503	0.357185	0.916717
	2.3102	1.58557	0.016527		1.10674	0.368769	0.906257
	2.3105	1.58825	0.0121183		1.1081	0.38018	0.895851
	2.31091	1.59088	0.00809702		1.1091	0.391412	0.885543
	2.3114	1.59344	0.0044808		1.10972	0.402457	0.875342
	2.31195	1.5959	0.00124719		1.10997	0.41331	0.865232
	2.31258	1.59825	-0.00157876		1.1098	0.423971	0.855233
	2.31331	1.60052	-0.00399777		1.10919	0.434425	0.845366
	2.31414	1.60272	-0.00601754		1.10813	0.444651	0.835651
	2.31509	1.60486	-0.00765833		1.1066	0.454634	0.826104
	2.31614	1.60695	-0.00892319		1.10459	0.464374	0.816735
	2.31728	1.60896	-0.00979873		1.1021	0.473828	0.807542
	2.3185	1.61095	-0.0103338		1.09911	0.482991	0.79854
	2.31977	1.61294	-0.0105342		1.09566	0.491851	0.789723
	2.32113	1.61494	-0.010378		1.09174	0.500417	0.781085
	2.32257	1.61694	-0.00984986		1.08734	0.5087	0.772672
	2.32412	1.61894	-0.00898814		1.08244	0.516708	0.764522
	2.32578	1.62094	-0.0077919		1.07699	0.524445	0.756616
	2.32755	1.62292	-0.0062454		1.07099	0.531874	0.748942
	2.3294	1.62496	-0.00436173		1.06446	0.538975	0.741489
	2.33137	1.62705	-0.00215455		1.05743	0.54576	0.734263
	2.33344	1.62917	0.000390492		1.04991	0.552205	0.727273
	2.33558	1.63134	0.00323464		1.04186	0.558289	0.720532
	2.3378	1.63352	0.00636607		1.03328	0.564018	0.714064
	2.34011	1.63577	0.00977037		1.02411	0.569346	0.707887
	2.34255	1.63809	0.0134305		1.01437	0.574269	0.701957
	2.34514	1.64052	0.0173603		1.00411	0.578793	0.696271
	2.3479	1.64306	0.0215371		0.99329	0.58291	0.690844
	2.35077	1.64569	0.0259683		0.981948	0.586603	0.685687
	2.35376	1.64837	0.0306603		0.970068	0.589855	0.680822
	2.35684	1.65107	0.0356136		0.957615	0.592657	0.676261
	2.36005	1.65384	0.0408211		0.944575	0.595024	0.671984
	2.36337	1.65669	0.04627		0.930941	0.596976	0.66799
	2.36681	1.65961	0.0519383		0.916713	0.598519	0.664241
	2.37038	1.66261	0.0578251		0.901907	0.59967	0.660728
	2.37405	1.6657	0.063939		0.886564	0.600431	0.657432
	2.37788	1.66888	0.0702705		0.870665	0.60081	0.654348
	2.38181	1.67215	0.0768113		0.85421	0.600804	0.651497
	2.38583	1.67554	0.0835411		0.837238	0.600386	0.648883
	2.38992	1.67904	0.0904463		0.819733	0.599577	0.646526
	2.39408	1.68265	0.0975265		0.801697	0.598375	0.644413
	2.39832	1.68638	0.10478		0.783145	0.596802	0.642536
	2.40263	1.69023	0.11219		0.764087	0.594826	0.64086
	2.40702	1.69419	0.119744		0.744519	0.592467	0.639391
	2.41151	1.69826	0.12745		0.724447	0.589721	0.63812
	2.41607	1.70243	0.135281		0.703877	0.586589	0.637083
	2.42066	1.70666	0.143226		0.682857	0.583084	0.636279
	2.42529	1.71094	0.15125		0.661428	0.579259	0.635687
	2.42996	1.71528	0.159357		0.639644	0.575124	0.635278
	2.43463	1.71966	0.167518		0.617514	0.570694	0.635063
	2.4393	1.72409	0.175726		0.595062	0.565964	0.635059
	2.44395	1.72857	0.18395		0.572264	0.560932	0.635277
	2.4486	1.73307	0.192188		0.549173	0.555626	0.635715
	2.45323	1.73759	0.200444		0.525793	0.550046	0.636367
	2.4578	1.74209	0.208653		0.502116	0.544191	0.637231
	2.4623	1.74661	0.21682		0.478204	0.538099	0.638316
	2.46669	1.75111	0.224932		0.454092	0.531772	0.639587
	2.47097	1.75562	0.232971		0.429791	0.525214	0.641015
	2.47516	1.76013	0.24093		0.405323	0.518456	0.64257
	2.47926	1.76462	0.248791		0.380729	0.51149	0.644272
	2.48327	1.76913	0.256545		0.356038	0.504333	0.646144
	2.48715	1.77365	0.264167		0.331272	0.496987	0.648198
	2.49087	1.77818	0.271636		0.306434	0.489464	0.650452
	2.49442	1.78272	0.278941		0.281577	0.481767	0.652911
	2.49776	1.78724	0.28604		0.25677	0.47394	0.655561
	2.5009	1.79175	0.292931		0.23202	0.465992	0.658374
	2.50385	1.79628	0.299611		0.207334	0.457909	0.66134
	2.50661	1.80079	0.306073		0.182728	0.449698	0.664469
	2.50921	1.80529	0.312296		0.158246	0.441355	0.667786
	2.51161	1.80978	0.318258		0.133942	0.432938	0.671297
	2.5138	1.81425	0.323952		0.109838	0.424463	0.675004
	2.51577	1.81871	0.329373		0.0859856	0.415938	0.67891
	2.51752	1.82316	0.334501		0.0624205	0.407366	0.682983
	2.51911	1.82761	0.339334		0.0391816	0.398751	0.687218
	2.52052	1.83204	0.343866		0.0162902	0.390107	0.691583
	2.52181	1.83647	0.348122		-0.00623791	0.381445	0.6961
	2.52297	1.84091	0.35209		-0.0283895	0.372772	0.700758
	2.524	1.84534	0.35577		-0.0501195	0.364139	0.705575
	2.52486	1.84977	0.359137		-0.0713858	0.355571	0.71055
	2.52555	1.85423	0.36216		-0.092178	0.347061	0.715673
	2.5261	1.85875	0.364856		-0.112488	0.338615	0.720955
	2.52654	1.8633	0.367194		-0.132244	0.330228	0.726392
	2.52687	1.86793	0.369152		-0.151385	0.321902	0.731999
	2.52711	1.87262	0.370755		-0.169939	0.31368	0.737754
	2.52728	1.87735	0.37203		-0.187887	0.30556	0.743657
	2.52738	1.8821	0.37297		-0.205226	0.297549	0.749714
	2.52742	1.88686	0.373567		-0.221912	0.289647	0.755908
	2.52739	1.8916	0.373823		-0.237888	0.281846	0.762264
	2.52731	1.89636	0.37373		-0.253142	0.274176	0.768783
	2.52721	1.90115	0.373289		-0.267689	0.266643	0.775487
	2.52709	1.90596	0.372505		-0.281514	0.259247	0.782372
	2.52692	1.91082	0.37139		-0.29455	0.251982	0.789399
	2.52669	1.9157	0.36994		-0.30677	0.244851	0.796573
	2.52641	1.92061	0.368146		-0.318146	0.237864	0.803905
	2.52612	1.92554	0.365972		-0.328694	0.231023	0.811399
	2.5258	1.93052	0.363445		-0.338426	0.224346	0.819049
	2.52547	1.93552	0.360549		-0.347354	0.217854	0.826856
	2.52515	1.94049	0.357289		-0.355448	0.211552	0.834822
	2.52484	1.94541	0.353669		-0.362672	0.205461	0.842953
	2.52455	1.9503	0.349684		-0.369007	0.199593	0.851235
	2.52428	1.95517	0.345345		-0.374465	0.193959	0.85967
	2.52402	1.96002	0.340668		-0.379061	0.18857	0.868253
	2.52379	1.96482	0.335673		-0.382796	0.18345	0.87701
	2.52357	1.96957	0.330354		-0.385655	0.178599	0.88595
	2.52334	1.97424	0.32468		-0.387611	0.174032	0.895056
	2.5231	1.97885	0.318669		-0.388649	0.169748	0.904304
	2.52286	1.9834	0.312354		-0.388768	0.165736	0.913673
	2.52262	1.98788	0.305762		-0.387944	0.162011	0.923168
	2.52239	1.99226	0.29889		-0.386161	0.158566	0.932796
	2.52216	1.99651	0.291736		-0.383448	0.155407	0.942521
	2.52189	2.00062	0.284342		-0.379796	0.15256	0.952343
	2.52155	2.00462	0.27674		-0.375216	0.150023	0.962257
	2.52117	2.00847	0.268942		-0.36974	0.147814	0.972268
	2.52078	2.01217	0.260949		-0.363335	0.145929	0.982381
	2.52039	2.0157	0.252788		-0.356027	0.144359	0.992577
	2.51997	2.01908	0.244469		-0.347845	0.143092	1.00281
	2.51955	2.0223	0.235985		-0.33878	0.142144	1.01305
	2.51908	2.02528	0.22736		-0.328821	0.141546	1.02327
	2.51854	2.02803	0.218588		-0.31797	0.141307	1.03345
	2.51792	2.03053	0.209659		-0.306242	0.141414	1.04362
	2.51727	2.03277	0.2006		-0.293688	0.14185	1.05377
	2.51656	2.03479	0.191443		-0.28035	0.142624	1.06386
	2.51582	2.03657	0.182233		-0.266284	0.143731	1.07389
	2.51508	2.03804	0.17297		-0.251491	0.145163	1.08389
	2.51435	2.03918	0.163651		-0.235919	0.146937	1.09385
	2.51362	2.04001	0.154282		-0.219591	0.149011	1.10371
	2.51288	2.04053	0.144858		-0.202544	0.151376	1.11346
	2.5121	2.04076	0.135401		-0.184824	0.154044	1.12308
	2.5113	2.04068	0.125898		-0.166464	0.157003	1.13254
	2.51044	2.04029	0.11637		-0.147484	0.160247	1.14184
	2.50956	2.03954	0.106821		-0.127929	0.163716	1.15097
	2.50867	2.03846	0.0972681		-0.107852	0.167383	1.1599
	2.50783	2.03705	0.0877141		-0.0872631	0.171265	1.1686
	2.50706	2.03534	0.0781599		-0.0661228	0.175346	1.17708
	2.50636	2.03332	0.0686182		-0.044429	0.179624	1.18532
	2.50576	2.03101	0.0591098		-0.0222441	0.18408	1.19331
	2.50527	2.02837	0.0496602		0.00039941	0.188699	1.20104
	2.5049	2.02538	0.040271		0.0234818	0.193451	1.20848
	2.50463	2.02208	0.0309522		0.0469644	0.19834	1.21561
	2.50447	2.01844	0.0217047		0.0707754	0.203363	1.22242
	2.50443	2.0145	0.0125622		0.0948639	0.208491	1.22892
	2.50449	2.01025	0.00352035		0.119206	0.213711	1.23509
	2.50468	2.00573	-0.00543729		0.143781	0.219006	1.24092
	2.50499	2.00093	-0.0143042		0.168564	0.224363	1.24639
	2.50543	1.99586	-0.0230761		0.193547	0.229765	1.25153
	2.50597	1.99049	-0.0316992		0.218677	0.235199	1.25629
	2.50666	1.98478	-0.0401819		0.243882	0.240662	1.26066
	2.50746	1.97879	-0.0485084		0.269114	0.246153	1.26466
	2.50838	1.97252	-0.0566845		0.294341	0.251663	1.26829
	2.50938	1.96597	-0.0647095		0.319569	0.257189	1.27153
	2.51045	1.95916	-0.0725844		0.344795	0.262719	1.27439
	2.51162	1.95209	-0.0803083		0.369991	0.268224	1.27686
	2.51287	1.94476	-0.0878745		0.395065	0.273685	1.27891
	2.51421	1.93717	-0.0952758		0.419985	0.279098	1.28057
	2.51562	1.92934	-0.102482		0.444735	0.284455	1.28185
	2.51711	1.92127	-0.109461		0.469308	0.28975	1.28276
	2.51866	1.91296	-0.116204		0.493655	0.29496	1.28331
	2.52027	1.90441	-0.122757		0.517744	0.300101	1.28351
	2.52191	1.89561	-0.129129		0.541535	0.305175	1.28334
	2.52357	1.88659	-0.135307		0.565019	0.310188	1.28279
	2.52524	1.87739	-0.141281		0.588187	0.315155	1.28189
	2.5269	1.868	-0.147055		0.611026	0.320032	1.28064
	2.52854	1.85841	-0.152633		0.633485	0.324813	1.27905
	2.53018	1.84864	-0.157982		0.655551	0.329513	1.27716
	2.53181	1.83867	-0.163121		0.677217	0.334116	1.27498
	2.53337	1.82847	-0.168037		0.698451	0.338623	1.27251
	2.53489	1.81805	-0.17274		0.71924	0.343034	1.26971
	2.53635	1.8074	-0.177221		0.739563	0.347375	1.26659
	2.53774	1.79655	-0.181496		0.759384	0.351638	1.26316
	2.53902	1.78553	-0.185552		0.778666	0.355812	1.2594
	2.54018	1.77438	-0.189381		0.797418	0.359876	1.25532
	2.5412	1.7631	-0.192962		0.815595	0.363823	1.25095
	2.54208	1.75164	-0.196326		0.833183	0.36761	1.24631
	2.54282	1.74001	-0.199486		0.850172	0.371213	1.2414
	2.54347	1.72819	-0.202465		0.866532	0.374632	1.23623
	2.54401	1.71618	-0.205253		0.882261	0.377857	1.23081
	2.54444	1.70399	-0.207867		0.897334	0.380888	1.22514
	2.54476	1.69162	-0.2103		0.911747	0.383756	1.21922
	2.54492	1.67908	-0.212534		0.925512	0.386484	1.21305
	2.54492	1.66636	-0.214573		0.938576	0.389034	1.20665
	2.54472	1.6535	-0.216434		0.950953	0.391379	1.20004
	2.54432	1.64054	-0.218117		0.96261	0.393515	1.19322
	2.54373	1.62745	-0.219608		0.973546	0.395438	1.18621
	2.54294	1.61422	-0.220927		0.983749	0.397136	1.17904
	2.54197	1.60081	-0.222075		0.993217	0.398605	1.17166
	2.54081	1.58726	-0.22307		1.00197	0.399843	1.16411
	2.53946	1.5736	-0.223929		1.01	0.400843	1.15643
	2.53791	1.55985	-0.22465		1.01726	0.401624	1.14865
	2.53614	1.54599	-0.225258		1.02376	0.40219	1.1408
	2.53419	1.53204	-0.225748		1.02947	0.402525	1.13287
	2.53203	1.51801	-0.226125		1.03439	0.402627	1.12488
	2.52965	1.50395	-0.226398		1.03854	0.402473	1.11683
	2.52706	1.48985	-0.226606		1.04196	0.402052	1.10872
	2.52427	1.47568	-0.226747		1.04466	0.401385	1.10058
	2.52127	1.46144	-0.226819		1.0466	0.400468	1.09244
	2.51807	1.44715	-0.226798		1.04782	0.399312	1.08431
	2.51466	1.43278	-0.226709		1.04833	0.397934	1.07622
	2.51105	1.41836	-0.226536		1.04822	0.396335	1.06822
	2.50723	1.40391	-0.226259		1.04748	0.394538	1.06029
	2.5032	1.38945	-0.225903		1.04612	0.392532	1.05243
	2.49898	1.37501	-0.225445		1.04413	0.390326	1.04467
	2.49455	1.3606	-0.224887		1.04153	0.387968	1.03702
	2.48991	1.34623	-0.224214		1.03838	0.385487	1.02947
	2.48506	1.33191	-0.223458		1.0347	0.382857	1.02202
	2.47998	1.31766	-0.222632		1.03045	0.380089	1.01469
	2.47465	1.30349	-0.221766		1.02565	0.377173	1.0075
	2.46909	1.28941	-0.220868		1.02037	0.374109	1.00047
	2.46331	1.27539	-0.219933		1.01464	0.370899	0.993601
	2.45734	1.26145	-0.21895		1.00847	0.367572	0.986914
	2.4512	1.2476	-0.217934		1.0019	0.364143	0.980442
	2.44489	1.23385	-0.216885		0.994905	0.360602	0.974189
	2.43843	1.22022	-0.2158		0.987482	0.356988	0.968162
	2.43181	1.2067	-0.214646		0.979717	0.353321	0.962378
	2.42508	1.19329	-0.213424		0.971654	0.349614	0.956859
	2.41823	1.17997	-0.212151		0.96333	0.345848	0.951575
	2.41127	1.16676	-0.210846		0.954801	0.34201	0.946515
	2.40419	1.15366	-0.209538		0.946082	0.338096	0.941679
	2.39697	1.14069	-0.208232		0.937164	0.334105	0.93708
	2.38963	1.12787	-0.206917		0.928079	0.330072	0.93268
	2.38222	1.11519	-0.205606		0.918853	0.326013	0.928469
	2.37473	1.10267	-0.204306		0.909512	0.321954	0.92443
	2.36718	1.09029	-0.203034		0.900051	0.317917	0.920595
	2.35953	1.07809	-0.201813		0.890482	0.313927	0.916955
	2.35179	1.06604	-0.200653		0.880843	0.309965	0.913518
	2.34399	1.05415	-0.199546		0.871156	0.306029	0.910296
	2.33612	1.0424	-0.198482		0.86143	0.302097	0.907257
	2.3282	1.03079	-0.197478		0.851687	0.298188	0.904386
	2.32024	1.01937	-0.196532		0.841947	0.294312	0.901676
	2.31223	1.00816	-0.19563		0.83225	0.290509	0.899117
	2.30421	0.997166	-0.194775		0.822595	0.286801	0.896703
	2.29619	0.986388	-0.194003		0.81298	0.283204	0.894424
	2.28818	0.975834	-0.193287		0.80345	0.279736	0.892281
	2.28019	0.965511	-0.192624		0.794025	0.276394	0.890256
	2.27228	0.955387	-0.192015		0.784693	0.273172	0.888348
	2.26447	0.945473	-0.191472		0.775511	0.270025	0.886543
	2.2568	0.935795	-0.190998		0.766478	0.266978	0.884805
	2.24924	0.926353	-0.190617		0.757606	0.264031	0.883101
	2.24179	0.917171	-0.190336		0.748863	0.261195	0.881445
	2.23444	0.908227	-0.190146		0.740253	0.25847	0.879838
	2.2272	0.899551	-0.190049		0.73177	0.25586	0.878286
	2.22009	0.891143	-0.190047		0.72343	0.253376	0.876771
	2.21312	0.88304	-0.190151		0.715273	0.250998	0.8753
	2.20631	0.875256	-0.190322		0.707308	0.248739	0.873857
	2.19967	0.867772	-0.19056		0.699555	0.246606	0.872429
	2.1932	0.8606	-0.190847		0.692023	0.244642	0.871027
	2.18694	0.853722	-0.191201		0.684745	0.242838	0.869677
	2.18089	0.847153	-0.191612		0.677754	0.241222	0.868396
	2.17506	0.840867	-0.192081		0.671057	0.239798	0.867138
	2.16945	0.834895	-0.192594		0.664609	0.238571	0.865893
	2.16406	0.829279	-0.19315		0.658446	0.237538	0.864665
	2.15888	0.824065	-0.193751		0.652614	0.236717	0.863469
	2.15392	0.819223	-0.194394		0.647151	0.236114	0.862336
	2.1492	0.814764	-0.195061		0.642081	0.23574	0.861283
	2.14474	0.810658	-0.195753		0.637412	0.235555	0.8603
	2.14056	0.806877	-0.196495		0.633123	0.235549	0.859341
	2.13666	0.803408	-0.197287		0.629194	0.235727	0.858432
	2.13302	0.80031	-0.198092		0.625637	0.236121	0.857583
	2.12964	0.797594	-0.198922		0.622444	0.236751	0.856814
	2.12652	0.795263	-0.199784		0.619632	0.237633	0.856138
	2.12368	0.793309	-0.200686		0.617172	0.238774	0.855536
	2.12112	0.791723	-0.201603		0.615069	0.240173	0.855017
	2.11883	0.790494	-0.202544		0.613356	0.241818	0.854565
	2.1168	0.789674	-0.203501		0.612035	0.243655	0.854194
	2.11503	0.789275	-0.204469		0.611076	0.245688	0.853924
	2.1135	0.789239	-0.205445		0.61047	0.24793	0.853739
	2.11217	0.78956	-0.20645		0.610181	0.250364	0.853655
	2.11107	0.790237	-0.207471		0.610205	0.253013	0.853641
	2.11017	0.791278	-0.208507		0.610557	0.255887	0.853705
	2.10949	0.792656	-0.209553		0.611237	0.258996	0.853869
	2.10907	0.794354	-0.2106		0.61228	0.262331	0.854144
	2.10888	0.796402	-0.211669		0.613652	0.26587	0.854542
	2.10893	0.798807	-0.212769		0.615332	0.269603	0.855062
	2.10922	0.801545	-0.213911		0.617245	0.273511	0.855707
	2.10969	0.804608	-0.215076		0.61937	0.277594	0.856481
	2.11037	0.808007	-0.216257		0.621706	0.281859	0.857386
	2.11125	0.811762	-0.21747		0.624256	0.286325	0.858401
	2.11232	0.815848	-0.218719		0.627013	0.290974	0.859546
	2.11357	0.820236	-0.219992		0.62997	0.295787	0.860852
	2.11502	0.824887	-0.221299		0.633115	0.300765	0.862332
	2.11667	0.829798	-0.222636		0.636413	0.305869	0.864008
	2.11852	0.83496	-0.224001		0.639858	0.311133	0.865894
	2.12054	0.840329	-0.225394		0.643437	0.316542	0.867993
	2.1227	0.845915	-0.226809		0.647113	0.322057	0.870314
	2.12498	0.851744	-0.228241		0.650858	0.327677	0.872832
	2.12737	0.857804	-0.229679		0.654649	0.333448	0.875558
	2.12986	0.864097	-0.23111		0.658491	0.339364	0.878513
	2.13242	0.87058	-0.232533		0.662365	0.345424	0.881742
	2.13505	0.877277	-0.233963		0.66621	0.351617	0.885256
	2.13774	0.884151	-0.235394		0.670035	0.357928	0.889036
	2.14049	0.891183	-0.236842		0.673826	0.36434	0.893066
	2.14328	0.898369	-0.238312		0.677563	0.370818	0.897346
	2.14609	0.905712	-0.239833		0.681222	0.377343	0.901881
	2.14894	0.913208	-0.2414		0.684792	0.383911	0.906676
	2.15182	0.920846	-0.242999		0.688254	0.390501	0.911744
	2.15476	0.928629	-0.244589		0.691603	0.397136	0.917069
	2.15771	0.936574	-0.246202		0.694841	0.403792	0.922628
	2.16064	0.944669	-0.247847		0.697975	0.410466	0.928413
	2.16356	0.952905	-0.249522		0.701012	0.417147	0.934459
	2.16648	0.961305	-0.251203		0.703936	0.423807	0.940761
	2.1694	0.96985	-0.252896		0.706759	0.43044	0.947313
	2.17228	0.978549	-0.254576		0.709463	0.437044	0.954091
	2.17511	0.987371	-0.256239		0.712071	0.443594	0.961091
	2.17785	0.996338	-0.257891		0.714565	0.450089	0.968308
	2.1805	1.00542	-0.259527		0.716941	0.456533	0.975733
	2.18305	1.01461	-0.261148		0.719208	0.462909	0.983382
	2.18548	1.02387	-0.26277		0.721368	0.46919	0.991256
	2.18784	1.03321	-0.264362		0.723445	0.475352	0.999359
	2.19012	1.04264	-0.265913		0.725463	0.481393	1.00767
	2.19232	1.05214	-0.267426		0.72742	0.487327	1.01619
	2.19439	1.06172	-0.268923		0.729321	0.493158	1.0249
	2.19632	1.07134	-0.2704		0.731132	0.498869	1.03378
	2.19808	1.08102	-0.271846		0.732838	0.50445	1.04279
	2.19968	1.09075	-0.273259		0.734489	0.509901	1.05196
	2.20111	1.10052	-0.27464		0.73609	0.515205	1.06131
	2.20234	1.1103	-0.275973		0.73766	0.520367	1.07086
	2.20339	1.1201	-0.277267		0.739184	0.525371	1.08058
	2.20425	1.12994	-0.27854		0.740655	0.53019	1.09047
	2.20489	1.13981	-0.279787		0.742094	0.534816	1.10052
	2.20533	1.14969	-0.281005		0.743531	0.539263	1.1107
	2.20555	1.1596	-0.282176		0.744976	0.543527	1.12098
	2.20555	1.16952	-0.283283		0.746453	0.547603	1.13135
	2.20528	1.17945	-0.284342		0.747957	0.551455	1.14184
	2.20472	1.18937	-0.285327		0.74948	0.555081	1.15245
	2.20384	1.19928	-0.286264		0.751051	0.558468	1.1632
	2.20264	1.20918	-0.287142		0.752708	0.561624	1.17406
	2.20117	1.21907	-0.287966		0.754445	0.56455	1.18502
	2.1994	1.22894	-0.288767		0.756279	0.567224	1.19609
	2.19734	1.23878	-0.289528		0.758216	0.569635	1.20726
	2.19502	1.24858	-0.290243		0.760269	0.57176	1.2185
	2.19242	1.25834	-0.290903		0.762435	0.573595	1.22979
	2.1895	1.26812	-0.291508		0.76472	0.575133	1.24112
	2.18632	1.27793	-0.292089		0.767111	0.57638	1.25247
	2.18285	1.28775	-0.292651		0.769623	0.577319	1.26384
	2.1791	1.29756	-0.29319		0.772261	0.577945	1.27524
	2.17508	1.30735	-0.29368		0.775028	0.578284	1.28667
	2.17078	1.31708	-0.294097		0.777952	0.578314	1.29811
	2.16618	1.32678	-0.29443		0.78103	0.578053	1.30954
	2.1613	1.33647	-0.294694		0.7843	0.577484	1.32093
	2.15615	1.34614	-0.294896		0.787738	0.576603	1.33225
	2.15074	1.35578	-0.295074		0.791336	0.575422	1.34349
	2.14506	1.36538	-0.295248		0.795116	0.573938	1.35463
	2.13912	1.37499	-0.295409		0.799097	0.572147	1.36566
	2.13292	1.38461	-0.295556		0.80329	0.570078	1.3766
	2.12648	1.39424	-0.295698		0.807722	0.567706	1.38743
	2.11979	1.40387	-0.295834		0.812342	0.565023	1.39812
	2.11289	1.4135	-0.29597		0.817151	0.562056	1.40864
	2.10577	1.42313	-0.296114		0.822174	0.558796	1.41898
	2.09843	1.43275	-0.296283		0.827422	0.55526	1.42911
	2.09085	1.4424	-0.296454		0.832895	0.551436	1.43899
	2.08304	1.45206	-0.296626		0.838618	0.547344	1.44861
	2.075	1.46177	-0.29679		0.844589	0.543014	1.45799
	2.06677	1.47151	-0.296953		0.850809	0.538453	1.4671
	2.05836	1.48127	-0.297128		0.857264	0.533695	1.47593
	2.04975	1.49109	-0.297301		0.863967	0.528736	1.48447
	2.04096	1.50094	-0.297484		0.870927	0.523585	1.49269
	2.03197	1.5108	-0.297641		0.878157	0.518238	1.50057
	2.0228	1.5207	-0.297777		0.885672	0.512671	1.50812
	2.01344	1.53063	-0.297879		0.893459	0.506902	1.5153
	2.00392	1.54062	-0.29797		0.90151	0.500908	1.5221
	1.99424	1.55068	-0.29805		0.90984	0.4947	1.52854
	1.9844	1.56081	-0.29813		0.91846	0.488273	1.53459
	1.97445	1.571	-0.298211		0.927366	0.481637	1.54025
	1.96443	1.58125	-0.298301		0.936562	0.474846	1.5455
	1.95433	1.59159	-0.298413		0.946021	0.467949	1.55034
	1.94418	1.60199	-0.298569		0.955748	0.460968	1.55473
	1.93403	1.61244	-0.29875		0.965747	0.453927	1.55864
	1.92387	1.62287	-0.298944		0.976018	0.446839	1.56207
	1.9137	1.63334	-0.299149		0.986556	0.439696	1.56507
	1.90351	1.64383	-0.299386		0.997347	0.432502	1.56762
	1.89333	1.65435	-0.299649		1.00836	0.425281	1.5697
	1.88316	1.66493	-0.299952		1.0196	0.418049	1.57132
	1.87303	1.67557	-0.300277		1.03105	0.410808	1.57246
	1.86291	1.68624	-0.30061		1.04275	0.403612	1.57312
	1.85285	1.69692	-0.300977		1.05471	0.396475	1.57329
	1.84286	1.7076	-0.301402		1.06694	0.389412	1.57295
	1.83296	1.7183	-0.301872		1.07941	0.382431	1.57213
	1.82313	1.72903	-0.302387		1.09213	0.375541	1.57083
	1.81337	1.73978	-0.302953		1.10509	0.368743	1.56905
	1.80366	1.75054	-0.303545		1.11827	0.362036	1.5668
	1.79401	1.7613	-0.304157		1.13165	0.355395	1.56409
	1.78447	1.77203	-0.304816		1.14524	0.348841	1.56092
	1.77507	1.78274	-0.305518		1.15899	0.342398	1.5573
	1.76582	1.79342	-0.306263		1.17288	0.336059	1.55326
	1.75672	1.80405	-0.307072		1.18692	0.329847	1.54881
	1.74777	1.81463	-0.307942		1.20109	0.323775	1.54393
	1.739	1.82519	-0.308882		1.21534	0.317836	1.53864
	1.73039	1.83573	-0.309897		1.22963	0.312093	1.53292
	1.72192	1.84623	-0.310964		1.24394	0.30654	1.52678
	1.71357	1.85665	-0.312071		1.25826	0.301199	1.52019
	1.70531	1.86697	-0.313243		1.27258	0.296048	1.5132
	1.69718	1.87719	-0.314489		1.28686	0.291107	1.50584
	1.6892	1.88729	-0.3158		1.30109	0.28638	1.49811
	1.6814	1.89729	-0.317169		1.31522	0.281865	1.49006
	1.67377	1.90717	-0.318587		1.32924	0.277588	1.48168
	1.66633	1.91694	-0.320076		1.34317	0.27356	1.47297
	1.65907	1.92659	-0.321631		1.35696	0.26979	1.46398
	1.65199	1.9361	-0.323257		1.37056	0.266317	1.45472
	1.64506	1.94548	-0.32496		1.38393	0.263159	1.4452
	1.63826	1.9547	-0.326744		1.39706	0.26029	1.43544
	1.63159	1.96377	-0.328613		1.40994	0.257723	1.42546
	1.62501	1.97269	-0.330551		1.42253	0.255467	1.41529
	1.61859	1.98145	-0.332546		1.43481	0.253517	1.40493
	1.61231	1.99002	-0.334588		1.44673	0.251881	1.39439
	1.60618	1.99841	-0.336673		1.45826	0.250558	1.38369
	1.6002	2.00659	-0.338812		1.46937	0.249551	1.37287
	1.59433	2.01456	-0.340983		1.48003	0.248869	1.36193
	1.58862	2.02231	-0.343182		1.49019	0.248518	1.35085
	1.58304	2.02985	-0.345395		1.49986	0.248497	1.33966
	1.57764	2.03718	-0.347604		1.50902	0.248798	1.32836
	1.57243	2.04427	-0.349789		1.51766	0.249362	1.317
	1.56738	2.05113	-0.351948		1.52579	0.25019	1.30557
	1.5625	2.05773	-0.35409		1.5334	0.251299	1.2941
	1.55777	2.06405	-0.356222		1.54047	0.252696	1.28257
	1.55318	2.07014	-0.358353		1.54698	0.254401	1.27098
	1.54874	2.07595	-0.360471		1.5529	0.256442	1.25937
	1.54444	2.08152	-0.36257		1.55821	0.258824	1.24773
	1.54031	2.08684	-0.364644		1.56286	0.261533	1.23609
	1.53633	2.09194	-0.36668		1.56685	0.26452	1.22447
	1.53249	2.09683	-0.368682		1.57016	0.267788	1.21289
	1.52884	2.1015	-0.370641		1.57277	0.271326	1.20133
	1.52533	2.10593	-0.372574		1.57467	0.275113	1.18978
	1.52196	2.11011	-0.374481		1.5758	0.27916	1.17827
	1.51873	2.11402	-0.376362		1.57615	0.283499	1.16681
	1.51568	2.11767	-0.378207		1.57573	0.28815	1.15541
	1.51279	2.12105	-0.380029		1.5745	0.293106	1.14409
	1.51008	2.12415	-0.381831		1.5725	0.298374	1.13287
	1.50752	2.12693	-0.383612		1.56969	0.303919	1.12173
	1.50512	2.12935	-0.385367		1.56607	0.309721	1.1107
	1.50288	2.13145	-0.387093		1.56162	0.315777	1.09979
	1.50079	2.13324	-0.388789		1.55633	0.322094	1.08899
	1.49884	2.13474	-0.390473		1.55021	0.32865	1.07834
	1.49702	2.13595	-0.392142		1.54324	0.335445	1.06783
	1.49532	2.13683	-0.393801		1.53542	0.342472	1.05747
	1.49374	2.13741	-0.395416		1.52675	0.349719	1.04724
	1.49227	2.13768	-0.396957		1.51727	0.357176	1.03715
	1.49087	2.13763	-0.398442		1.50692	0.36485	1.02723
	1.48956	2.13725	-0.39986		1.4957	0.372748	1.01751
	1.48833	2.13648	-0.401208		1.48365	0.380874	1.00803
	1.48716	2.13534	-0.40249		1.4708	0.389203	0.998796
	1.48607	2.13381	-0.403692		1.45718	0.397714	0.989814
	1.48503	2.13189	-0.404839		1.44278	0.406376	0.981079
	1.48407	2.12958	-0.405946		1.42761	0.415192	0.972604
	1.48317	2.12688	-0.407		1.41167	0.42414	0.964404
	1.48234	2.12386	-0.407985		1.39501	0.43323	0.956469
	1.48161	2.1205	-0.408916		1.37759	0.442463	0.948796
	1.48097	2.11682	-0.409747		1.35942	0.451805	0.941386
	1.48042	2.11279	-0.41047		1.34054	0.461255	0.934234
	1.47994	2.10841	-0.411093		1.32101	0.470816	0.927395
	1.47953	2.10365	-0.411598		1.30083	0.480475	0.920894
	1.4792	2.09853	-0.411991		1.28002	0.490227	0.914706
	1.47895	2.09308	-0.412276		1.25858	0.500073	0.908844
	1.47876	2.08733	-0.412443		1.23655	0.509971	0.903326
	1.47863	2.08128	-0.412498		1.21393	0.519911	0.898145
	1.47857	2.07491	-0.412441		1.19071	0.529858	0.893276
	1.47857	2.06824	-0.412281		1.16693	0.539794	0.888721
	1.47863	2.06128	-0.41201		1.14261	0.549717	0.884473
	1.47874	2.05405	-0.411662		1.11775	0.559591	0.880531
	1.47892	2.04656	-0.411248		1.09236	0.569445	0.876897
	1.47916	2.03882	-0.410776		1.06647	0.579264	0.873562
	1.47947	2.03086	-0.410233		1.04014	0.589057	0.870507
	1.47984	2.0227	-0.409597		1.01337	0.59884	0.867737
	1.48033	2.01435	-0.408875		0.986181	0.608576	0.865247
	1.48092	2.0058	-0.408065		0.958594	0.61826	0.863031
	1.48158	1.99706	-0.407151		0.930632	0.627856	0.861069
	1.48233	1.98816	-0.40616		0.902294	0.637335	0.859334
	1.48315	1.97912	-0.405121		0.87359	0.646669	0.857823
	1.48407	1.96994	-0.404037		0.844573	0.655859	0.856521
	1.48508	1.9606	-0.402904		0.815242	0.664901	0.855417
	1.48622	1.95114	-0.40172		0.785626	0.673778	0.854496
	1.48745	1.94155	-0.400475		0.75582	0.682488	0.853743
	1.48879	1.93186	-0.399198		0.725838	0.691032	0.853153
	1.49018	1.92205	-0.397925		0.69566	0.699388	0.85269
	1.49166	1.91213	-0.396675		0.665289	0.707583	0.852357
	1.49325	1.9021	-0.395424		0.634779	0.715575	0.852149
	1.49495	1.89199	-0.394183		0.60418	0.723349	0.852035
	1.49679	1.88181	-0.392934		0.573518	0.730885	0.851988
	1.49877	1.87159	-0.391678		0.542791	0.738198	0.852009
	1.50085	1.86133	-0.390415		0.512004	0.745249	0.852091
	1.50305	1.85101	-0.389155		0.481196	0.752038	0.852237
	1.50533	1.84066	-0.387882		0.450397	0.75855	0.852452
	1.50768	1.83029	-0.386582		0.419646	0.764792	0.852701
	1.5101	1.8199	-0.385276		0.388933	0.770787	0.852968
	1.51259	1.80951	-0.383959		0.358292	0.776543	0.853237
	1.51513	1.79912	-0.382656		0.327759	0.782047	0.853499
	1.51769	1.78873	-0.381368		0.297345	0.787299	0.853779
	1.52023	1.77838	-0.380105		0.267086	0.792301	0.854078
	1.52279	1.7681	-0.378874		0.236993	0.797042	0.854375
	1.52537	1.7579	-0.37767		0.207087	0.801488	0.854656
	1.52791	1.74778	-0.376499		0.177383	0.805641	0.854932
	1.53044	1.73778	-0.375351		0.147895	0.809511	0.855193
	1.53294	1.72789	-0.374207		0.11864	0.813086	0.85543
	1.53537	1.71813	-0.373058		0.0896614	0.816327	0.855621
	1.53773	1.7085	-0.371908		0.0609867	0.819204	0.855772
	1.54003	1.69903	-0.370778		0.0326429	0.821714	0.855859
	1.54226	1.68974	-0.369689		0.00465623	0.823867	0.855877
	1.54444	1.68063	-0.36865		-0.0229266	0.825642	0.855828
	1.54653	1.6717	-0.367655		-0.0501091	0.827062	0.855733
	1.54858	1.66294	-0.366711		-0.0768945	0.828149	0.855591
	1.55055	1.6544	-0.365827		-0.103265	0.828866	0.855383
	1.55245	1.64607	-0.365018		-0.129232	0.829229	0.855127
	1.55433	1.63795	-0.364286		-0.154747	0.829249	0.854828
	1.55618	1.63003	-0.363618		-0.179812	0.828914	0.854487
	1.55796	1.62235	-0.363001		-0.204438	0.828239	0.85411
	1.55968	1.61496	-0.362438		-0.228594	0.827209	0.853712
	1.5613	1.60787	-0.361949		-0.252225	0.825828	0.85326
	1.56284	1.60106	-0.361558		-0.2753	0.824104	0.852772
	1.56427	1.59455	-0.361268		-0.297838	0.822037	0.852239
	1.56558	1.58832	-0.361107		-0.319831	0.819625	0.851672
	1.56681	1.58241	-0.361068		-0.341283	0.816862	0.851078
	1.56795	1.57685	-0.361142		-0.362153	0.813749	0.850461
	1.56898	1.57162	-0.361318		-0.382455	0.810317	0.849794
	1.56992	1.56669	-0.361597		-0.402172	0.806623	0.849066
	1.57076	1.56208	-0.361975		-0.42131	0.802663	0.84828
	1.5715	1.55779	-0.362483		-0.439833	0.798446	0.847461
	1.57213	1.55385	-0.363102		-0.457731	0.793969	0.846603
	1.57266	1.55025	-0.363873		-0.475042	0.78921	0.845713
	1.57308	1.54697	-0.36481		-0.491769	0.784172	0.844811
	1.57343	1.544	-0.365889		-0.507909	0.778838	0.843858
	1.57368	1.54132	-0.367105		-0.523453	0.773206	0.842851
	1.57384	1.53895	-0.368472		-0.538347	0.767268	0.841814
	1.57392	1.53685	-0.369967		-0.552563	0.761017	0.840741
	1.5739	1.53504	-0.371571		-0.566111	0.754483	0.839632
	1.57378	1.53353	-0.373282		-0.579006	0.747665	0.838494
	1.5736	1.53233	-0.375121		-0.591253	0.74056	0.837311
	1.57335	1.53145	-0.377076		-0.602842	0.733144	0.836042
	1.57305	1.5309	-0.379163		-0.613767	0.725445	0.83467
	1.57271	1.53066	-0.381377		-0.624017	0.717478	0.833208
	1.57231	1.53074	-0.383677		-0.633582	0.709264	0.831662
	1.57187	1.53107	-0.386075		-0.642484	0.700783	0.830032
	1.57138	1.53169	-0.388559		-0.65072	0.692009	0.828305
	1.57085	1.53262	-0.39114		-0.658293	0.682934	0.826464
	1.57026	1.53383	-0.393829		-0.665173	0.673552	0.8245
	1.56963	1.53535	-0.396615		-0.671356	0.663881	0.822413
	1.56896	1.53719	-0.399486		-0.67683	0.65392	0.820239
	1.56827	1.53932	-0.402436		-0.681581	0.643697	0.817975
	1.56752	1.54173	-0.405488		-0.685626	0.633222	0.815618
	1.56672	1.54444	-0.408637		-0.688968	0.622512	0.81319
	1.56585	1.54744	-0.411852		-0.691607	0.611568	0.810684
	1.56494	1.55074	-0.415128		-0.693519	0.600419	0.80806
	1.56396	1.55435	-0.418464		-0.69469	0.58905	0.805305
	1.56293	1.55827	-0.421844		-0.69513	0.577454	0.802439
	1.56187	1.56252	-0.425273		-0.694836	0.565653	0.799485
	1.56082	1.56706	-0.428778		-0.693817	0.553667	0.796416
	1.55977	1.57188	-0.432357		-0.692048	0.541526	0.793234
	1.55874	1.57696	-0.435997		-0.689543	0.529262	0.789953
	1.55776	1.58233	-0.439681		-0.686296	0.516896	0.786576
	1.55681	1.58797	-0.443377		-0.682316	0.504416	0.78311
	1.55593	1.59389	-0.447082		-0.677589	0.491833	0.779566
	1.5551	1.60007	-0.450793		-0.672113	0.479163	0.775906
	1.55426	1.60651	-0.454543		-0.665877	0.466447	0.772145
	1.5534	1.61322	-0.458325		-0.658936	0.453677	0.768281
	1.55252	1.62019	-0.46215		-0.651316	0.440857	0.764325
	1.55163	1.62739	-0.466		-0.642972	0.428005	0.760302
	1.55075	1.63482	-0.469861		-0.633883	0.415151	0.756211
	1.5499	1.64246	-0.473721		-0.624013	0.402362	0.752051
	1.54909	1.65033	-0.477571		-0.613376	0.38965	0.747827
	1.54831	1.65842	-0.481401		-0.602	0.377025	0.743567
	1.54759	1.66672	-0.485202		-0.589913	0.364499	0.739269
	1.54694	1.67525	-0.488961		-0.577122	0.352095	0.734933
	1.54638	1.68398	-0.492682		-0.563615	0.339825	0.730539
	1.54595	1.69295	-0.49637		-0.549428	0.327709	0.726102
	1.54565	1.70212	-0.500056		-0.534559	0.315742	0.721607
	1.54547	1.7115	-0.503753		-0.519028	0.303952	0.717047
	1.54537	1.72108	-0.507461		-0.502861	0.292332	0.712432
	1.5454	1.73087	-0.511159		-0.486045	0.280935	0.707756
	1.54554	1.74084	-0.51482		-0.4686	0.269795	0.703003
	1.54584	1.75101	-0.518465		-0.450581	0.258907	0.698188
	1.54628	1.76134	-0.522106		-0.432037	0.248286	0.693319
	1.54692	1.7718	-0.525739		-0.41299	0.237925	0.68844
	1.54775	1.7824	-0.529344		-0.393414	0.227812	0.683534
	1.54878	1.79314	-0.5329		-0.373331	0.217993	0.678586
	1.55002	1.80398	-0.536401		-0.352767	0.208483	0.673594
	1.55148	1.81493	-0.539848		-0.331731	0.199292	0.668548
	1.55319	1.826	-0.543227		-0.310275	0.190445	0.663451
	1.55517	1.83715	-0.546548		-0.288444	0.181942	0.658312
	1.55742	1.84832	-0.549802		-0.266241	0.17381	0.653143
	1.55996	1.85952	-0.55298		-0.243709	0.166032	0.647962
	1.56277	1.87073	-0.556077		-0.220861	0.158582	0.642777
	1.56586	1.88192	-0.559091		-0.197737	0.151458	0.637561
	1.56922	1.89309	-0.562069		-0.174372	0.144672	0.632309
	1.57283	1.90424	-0.565013		-0.150777	0.138244	0.627032
	1.57667	1.91532	-0.567901		-0.126988	0.132195	0.621715
	1.58072	1.92637	-0.570725		-0.102996	0.126501	0.61635
	1.58499	1.93738	-0.573493		-0.0788495	0.121178	0.610945
	1.5895	1.94831	-0.576206		-0.0545488	0.116223	0.605527
	1.59425	1.95916	-0.578856		-0.0300783	0.11165	0.600091
	1.59925	1.96994	-0.581447		-0.00547278	0.107468	0.594659
	1.60449	1.98059	-0.58396		0.0192746	0.103672	0.589221
	1.61	1.9911	-0.586388		0.0441259	0.100219	0.583779
	1.61576	2.00149	-0.588731		0.0690644	0.0971067	0.578342
	1.62176	2.01177	-0.591024		0.0940305	0.0943201	0.572936
	1.62798	2.02189	-0.593247		0.119013	0.0918535	0.56756
	1.63437	2.03182	-0.595398		0.144019	0.0897204	0.562228
	1.64095	2.04154	-0.597453		0.169037	0.0879103	0.556942
	1.64773	2.05106	-0.599437		0.194061	0.0864536	0.551718
	1.65472	2.06036	-0.601344		0.219078	0.0853511	0.546545
	1.66193	2.06945	-0.603181		0.244074	0.0846207	0.541401
	1.66935	2.07832	-0.604942		0.269072	0.0842464	0.53626
	1.67697	2.08696	-0.60661		0.294096	0.0841887	0.531156
	1.68479	2.0954	-0.608185		0.319146	0.0844379	0.526086
	1.69279	2.10365	-0.609674		0.344178	0.0849503	0.521079
	1.70097	2.11169	-0.611087		0.36919	0.0857272	0.516129
	1.70933	2.11952	-0.612423		0.394176	0.086767	0.511255
	1.71783	2.12717	-0.613663		0.419104	0.0880607	0.506455
	1.72647	2.13461	-0.614802		0.44395	0.0896055	0.501729
	1.73525	2.14186	-0.615841		0.468726	0.091366	0.497067
	1.74416	2.14898	-0.61678		0.493455	0.0933518	0.492476
	1.75319	2.15594	-0.617618		0.51813	0.0955194	0.48797
	1.76234	2.16278	-0.618353		0.542689	0.0978639	0.483571
	1.7716	2.16946	-0.618981		0.567141	0.100389	0.479255
	1.78093	2.17598	-0.619526		0.591511	0.103091	0.475037
	1.79034	2.18232	-0.619975		0.615756	0.105944	0.470942
	1.7998	2.1885	-0.620305		0.639836	0.108926	0.466963
	1.80935	2.19451	-0.620525		0.663731	0.112019	0.463086
	1.81895	2.20037	-0.620619		0.687426	0.115201	0.459299
	1.8286	2.20612	-0.620585		0.710902	0.118475	0.455625
	1.83828	2.21173	-0.620418		0.734188	0.121843	0.452084
	1.84799	2.21721	-0.620128		0.757274	0.125299	0.448689
	1.85776	2.22255	-0.619723		0.780122	0.128797	0.445429
	1.86758	2.22772	-0.619194		0.802717	0.132294	0.442288
	1.87742	2.2327	-0.618526		0.825035	0.135777	0.439263
	1.88727	2.23754	-0.617718		0.847058	0.139233	0.436359
	1.89712	2.24222	-0.616787		0.868763	0.142675	0.433593
	1.90695	2.24673	-0.6157		0.89012	0.146086	0.430954
	1.91675	2.25108	-0.614469		0.911109	0.149466	0.428435
	1.92647	2.25527	-0.613091		0.93168	0.152778	0.426094
	1.93612	2.25929	-0.611555		0.95182	0.156003	0.423923
	1.94569	2.26315	-0.609889		0.971534	0.159132	0.421913
	1.95517	2.26686	-0.608074		0.990788	0.162159	0.420034
	1.96457	2.27042	-0.606101		1.00957	0.165051	0.418285
	1.97385	2.27382	-0.603958		1.02785	0.167804	0.416675
	1.98303	2.27706	-0.601649		1.04563	0.170431	0.415233
	1.99212	2.28014	-0.599205		1.06287	0.172924	0.413966
	2.00109	2.28306	-0.596623		1.07954	0.175281	0.412848
	2.00992	2.28575	-0.593909		1.09565	0.177491	0.411894
	2.01859	2.28823	-0.591019		1.11117	0.179561	0.411091
	2.02715	2.2905	-0.587967		1.12607	0.181476	0.410441
	2.03559	2.29255	-0.584748		1.14036	0.183219	0.409942
	2.04395	2.2944	-0.581352		1.15412	0.184818	0.409589
	2.05219	2.29603	-0.5778		1.1673	0.186258	0.409374
	2.06031	2.29744	-0.574077		1.17987	0.187508	0.409291
	2.06828	2.29863	-0.570192		1.19182	0.18856	0.409346
	2.07611	2.2996	-0.566158		1.2032	0.189404	0.409569
	2.08382	2.30034	-0.561953		1.21402	0.190045	0.409935
	2.09142	2.30086	-0.557576		1.22427	0.190469	0.410413
	2.09893	2.30115	-0.55303		1.23395	0.190655	0.411002
	2.10635	2.3012	-0.54833		1.24306	0.190587	0.411718
	2.11363	2.30096	-0.543477		1.25165	0.190276	0.412549
	2.12078	2.30045	-0.538484		1.2597	0.189714	0.413492
	2.1278	2.29965	-0.533319		1.26717	0.188898	0.414554
	2.13467	2.29856	-0.527966		1.27406	0.187819	0.415755
	2.1414	2.29719	-0.522437		1.28042	0.186473	0.417087
	2.14797	2.29549	-0.516746		1.28627	0.184873	0.418524
	2.15443	2.2935	-0.5109		1.29161	0.183033	0.420069
	2.16078	2.29122	-0.504905		1.29644	0.180935	0.421749
	2.16703	2.28865	-0.498757		1.30075	0.178581	0.423565
	2.17318	2.28579	-0.492488		1.30453	0.175944	0.42551
	2.17922	2.28261	-0.486117		1.30786	0.173054	0.427595
	2.18514	2.27912	-0.479637		1.31077	0.169893	0.429849
	2.19098	2.27531	-0.473093		1.31326	0.166475	0.432261
	2.19676	2.27119	-0.466482		1.31535	0.162778	0.434804
	2.20248	2.26671	-0.45982		1.31705	0.158816	0.437495
	2.20815	2.26186	-0.453105		1.31834	0.154585	0.440297
	2.21381	2.25666	-0.446346		1.31921	0.15011	0.443248
	2.21947	2.25112	-0.439557		1.31968	0.145389	0.44636
	2.2251	2.24526	-0.432724		1.31974	0.140427	0.449626
	2.23071	2.23907	-0.425848		1.31941	0.13523	0.453009
	2.23629	2.23251	-0.418965		1.31873	0.129832	0.456522
	2.24188	2.22561	-0.412091		1.31774	0.124219	0.460171
	2.24745	2.21833	-0.405249		1.31646	0.118407	0.463949
	2.25303	2.21069	-0.398441		1.31486	0.112409	0.46785
	2.25864	2.20271	-0.39169		1.31293	0.106265	0.471876
	2.26425	2.19439	-0.384983		1.31065	0.0999491	0.476021
	2.2699	2.18578	-0.378296		1.30806	0.0934711	0.48027
	2.27556	2.1769	-0.371645		1.30516	0.0868615	0.484609
	2.28123	2.16774	-0.365036		1.30198	0.0801587	0.489018
	2.28691	2.15831	-0.358487		1.2985	0.0733996	0.493481
	2.29261	2.14858	-0.352005		1.29474	0.0665886	0.498017
	2.29834	2.13858	-0.345565		1.29073	0.0597284	0.502633
	2.30411	2.12831	-0.339163		1.28644	0.052822	0.507325
	2.30996	2.11779	-0.332799		1.2819	0.0458905	0.512075
	2.31588	2.10703	-0.326491		1.27711	0.0389157	0.516896
	2.32189	2.09606	-0.320252		1.27207	0.0319416	0.521798
	2.32797	2.08487	-0.314075		1.26675	0.0249825	0.526786
	2.33413	2.07344	-0.307968		1.2612	0.0180789	0.531826
	2.34037	2.0618	-0.301922		1.2554	0.0112079	0.536892
	2.3467	2.04994	-0.295946		1.24936	0.00436579	0.541993
	2.35308	2.03786	-0.290012		1.24308	-0.00243638	0.547112
	2.35955	2.02559	-0.284125		1.23658	-0.00917074	0.552248
	2.36609	2.01307	-0.2783		1.22988	-0.0158177	0.557402
	2.37274	2.00033	-0.272556		1.22297	-0.0224096	0.562567
	2.37949	1.98737	-0.266894		1.21587	-0.0289368	0.567766
	2.38637	1.97423	-0.261288		1.20853	-0.0353603	0.572997
	2.39338	1.96094	-0.255761		1.20094	-0.0416578	0.578218
	2.40051	1.94749	-0.250302		1.19313	-0.0478242	0.583421
	2.40775	1.93385	-0.244898		1.18509	-0.0538207	0.588576
	2.41507	1.92004	-0.239563		1.17685	-0.0596453	0.593676
	2.42251	1.9061	-0.234292		1.1684	-0.0652924	0.598696
	2.43008	1.89203	-0.229089		1.15975	-0.0707598	0.603646
	2.43777	1.87786	-0.223961		1.15088	-0.0760429	0.608519
	2.44557	1.86359	-0.218913		1.14181	-0.0811435	0.613285
	2.45346	1.84925	-0.21392		1.13257	-0.0860342	0.617936
	2.46147	1.83484	-0.208976		1.12313	-0.0906719	0.622471
	2.46958	1.82042	-0.204092		1.11354	-0.0950596	0.626903
	2.47782	1.80595	-0.199324		1.10378	-0.0991905	0.631235
	2.48619	1.79143	-0.194639		1.09386	-0.103075	0.635463
	2.4947	1.77687	-0.190028		1.08376	-0.106722	0.639558
	2.5033	1.76227	-0.185488		1.07351	-0.110116	0.643512
	2.51199	1.74765	-0.181027		1.06315	-0.113252	0.647337
	2.52075	1.73302	-0.176636		1.05266	-0.116139	0.651035
	2.52958	1.7184	-0.172328		1.04209	-0.118776	0.654617
	2.53847	1.70381	-0.168145		1.03138	-0.121154	0.65809
	2.54737	1.6893	-0.164078		1.02057	-0.123284	0.661454
	2.55629	1.67485	-0.160119		1.00972	-0.125168	0.664704
	2.56525	1.66047	-0.156269		0.998819	-0.126815	0.667858
	2.57424	1.64612	-0.152533		0.987879	-0.128218	0.670911
	2.58323	1.63186	-0.148906		0.976884	-0.129391	0.673856
	2.59219	1.61771	-0.145412		0.96587	-0.13032	0.676675
	2.60112	1.6037	-0.142039		0.95488	-0.131017	0.679364
	2.61	1.58982	-0.13881		0.943907	-0.131482	0.681938
	2.61881	1.57609	-0.135729		0.932992	-0.131713	0.6844
	2.62755	1.56251	-0.132791		0.922143	-0.131708	0.686735
	2.6362	1.54911	-0.130002		0.911347	-0.131433	0.688961
	2.64471	1.5359	-0.127354		0.900611	-0.130899	0.691062
	2.65311	1.52289	-0.124843		0.889912	-0.130127	0.693036
	2.66139	1.5101	-0.122458		0.879214	-0.129135	0.694865
	2.66954	1.49749	-0.120211		0.868537	-0.127904	0.696543
	2.67753	1.48511	-0.118115		0.857898	-0.126469	0.698096
	2.68538	1.47298	-0.11614		0.847307	-0.124825	0.699518
	2.69305	1.46112	-0.114309		0.836788	-0.122974	0.70083
	2.70053	1.44954	-0.11262		0.826357	-0.120938	0.702061
	2.7078	1.43823	-0.111092		0.816025	-0.118706	0.703196
	2.71485	1.42723	-0.109695		0.805824	-0.11626	0.704215
	2.7217	1.41651	-0.108444		0.795737	-0.113599	0.705111
	2.72837	1.40608	-0.107334		0.785729	-0.110721	0.705899
	2.73485	1.39596	-0.10634		0.775792	-0.107619	0.706573
	2.74113	1.38614	-0.105442		0.765907	-0.104293	0.707121
	2.74717	1.37662	-0.104638		0.756094	-0.100743	0.707558
	2.75296	1.36741	-0.10393		0.746353	-0.0969948	0.707889
	2.75846	1.3585	-0.103325		0.736696	-0.0930595	0.708122
	2.76369	1.34993	-0.102826		0.727149	-0.0889649	0.708267
	2.76864	1.34168	-0.102414		0.717701	-0.084722	0.708321
	2.77331	1.33375	-0.102102		0.708317	-0.0803002	0.708278
	2.77764	1.32614	-0.101872		0.699003	-0.0756948	0.708186
	2.78164	1.31887	-0.101732		0.689746	-0.070883	0.708055
	2.78528	1.31193	-0.101667		0.680537	-0.0658916	0.707899
	2.78853	1.30531	-0.101667		0.671385	-0.0607136	0.707741
	2.79139	1.29905	-0.10175		0.662301	-0.0553372	0.707568
	2.79385	1.29315	-0.101952		0.653281	-0.0497383	0.707395
	2.79588	1.28761	-0.102262		0.644365	-0.0439301	0.707223
	2.7975	1.28243	-0.102634		0.635565	-0.0379399	0.707026
	2.79869	1.27759	-0.103063		0.626836	-0.0317408	0.706806
	2.79946	1.2731	-0.103549		0.618181	-0.0253729	0.706593
	2.79982	1.26897	-0.10408		0.609626	-0.0188282	0.706393
	2.79976	1.26519	-0.104669		0.601213	-0.0121211	0.70621
	2.79928	1.26176	-0.105329		0.592959	-0.00525915	0.706051
	2.79836	1.25865	-0.106079		0.58487	0.0017559	0.705925
	2.79696	1.25588	-0.106904		0.57693	0.00889856	0.705823
	2.79507	1.25342	-0.107808		0.569143	0.0161727	0.705746
	2.7927	1.25129	-0.10881		0.561492	0.0235993	0.705696
	2.78985	1.24949	-0.109909		0.553964	0.0311472	0.705686
	2.7865	1.24801	-0.111072		0.546555	0.0387805	0.705741
	2.78267	1.24685	-0.1123		0.539304	0.0464853	0.705853
	2.77838	1.24601	-0.113603		0.532218	0.0542696	0.706007
	2.77362	1.24546	-0.114973		0.525312	0.0621177	0.706216
	2.76842	1.24521	-0.116411		0.518546	0.0700186	0.706493
	2.76282	1.24525	-0.117931		0.51194	0.0779571	0.706805
	2.75682	1.2456	-0.11954		0.505508	0.0859317	0.707133
	2.75042	1.24625	-0.121273		0.499231	0.0939469	0.707493
	2.74363	1.24721	-0.123138		0.49313	0.102007	0.707913
	2.73647	1.24849	-0.125127		0.487145	0.110079	0.708423
	2.72893	1.2501	-0.127264		0.481266	0.118165	0.708993
	2.72103	1.25198	-0.129532		0.475549	0.126242	0.709608
	2.71279	1.25412	-0.131933		0.470017	0.134324	0.71029
	2.70424	1.25653	-0.134499		0.464695	0.14239	0.711064
	2.69537	1.25919	-0.137226		0.459578	0.150424	0.711922
	2.68621	1.2621	-0.140076		0.454683	0.158398	0.712893
	2.67674	1.26526	-0.143055		0.449978	0.166315	0.713978
	2.66698	1.26865	-0.146164		0.445477	0.174165	0.715205
	2.65692	1.27228	-0.149388		0.441222	0.181961	0.716569
	2.64655	1.27615	-0.15272		0.437237	0.189699	0.71805
	2.63588	1.28029	-0.15615		0.433485	0.197344	0.719664
	2.62493	1.28466	-0.159697		0.429949	0.204906	0.721422
	2.61378	1.28924	-0.163388		0.426634	0.212378	0.723315
	2.60246	1.29404	-0.167204		0.423531	0.219753	0.725335
	2.59101	1.29907	-0.171152		0.420612	0.22702	0.727468
	2.57945	1.3043	-0.175206		0.417916	0.23417	0.729716
	2.56781	1.30974	-0.179364		0.415446	0.241169	0.732092
	2.55612	1.31537	-0.18359		0.413205	0.248016	0.734594
	2.5444	1.32119	-0.187865		0.411222	0.254732	0.737239
	2.53263	1.32722	-0.192209		0.409527	0.261329	0.740017
	2.52082	1.33345	-0.19661		0.408103	0.267792	0.742919
	2.50905	1.33988	-0.201078		0.406917	0.274082	0.745946
	2.49735	1.34647	-0.205599		0.405953	0.280216	0.749086
	2.48568	1.35321	-0.210161		0.405225	0.286216	0.752318
	2.47409	1.36009	-0.214777		0.404785	0.292101	0.755653
	2.46258	1.36709	-0.219409		0.404632	0.297854	0.759063
	2.4512	1.37422	-0.224019		0.404789	0.303441	0.762569
	2.43994	1.38144	-0.228622		0.405223	0.30885	0.766159
	2.42884	1.38876	-0.233223		0.405897	0.314111	0.769827
	2.41789	1.39616	-0.237819		0.40682	0.319235	0.773531
	2.40716	1.4036	-0.242388		0.408008	0.324227	0.777277
	2.39668	1.41108	-0.246888		0.409447	0.329102	0.781065
	2.3864	1.41861	-0.251314		0.411144	0.333847	0.784891
	2.37632	1.42616	-0.255664		0.413107	0.33848	0.788708
	2.36646	1.43375	-0.259923		0.415321	0.342994	0.792519
	2.35688	1.44133	-0.264093		0.417786	0.3474	0.796349
	2.34758	1.44887	-0.268148		0.420507	0.351695	0.800182
	2.33858	1.4564	-0.272074		0.423481	0.355885	0.803994
	2.32989	1.46392	-0.27586		0.426706	0.359961	0.807782
	2.32153	1.47142	-0.279497		0.430204	0.363922	0.811547
	2.31352	1.47891	-0.28296		0.433954	0.36776	0.815284
	2.30584	1.48633	-0.286258		0.43797	0.371492	0.818982
	2.29853	1.4937	-0.289385		0.442282	0.375119	0.822633
	2.29163	1.50102	-0.292325		0.446873	0.378661	0.826185
	2.28513	1.50827	-0.29507		0.451768	0.382117	0.829623
	2.27906	1.51544	-0.297608		0.456955	0.385471	0.832935
	2.27347	1.52255	-0.299942		0.462423	0.388733	0.836122
	2.26834	1.52958	-0.302068		0.468168	0.391907	0.839198
	2.26371	1.53652	-0.303994		0.474178	0.395013	0.842168
	2.2596	1.54339	-0.305695		0.480435	0.398046	0.845037
	2.25599	1.5502	-0.30717		0.486964	0.40099	0.84779
	2.25289	1.55692	-0.308439		0.493807	0.403832	0.850446
	2.2503	1.56357	-0.309523		0.500969	0.406535	0.85298
	2.24822	1.57011	-0.310419		0.508441	0.409094	0.855349
	2.24665	1.57652	-0.311131		0.516189	0.411522	0.857555
	2.2456	1.58283	-0.311672		0.524203	0.413825	0.85956
	2.24509	1.58899	-0.31203		0.53248	0.416018	0.861341
	2.24513	1.59501	-0.312239		0.540993	0.418091	0.862874
	2.24574	1.60087	-0.312285		0.549737	0.420062	0.864167
	2.24693	1.60657	-0.312177		0.558713	0.421931	0.865233
	2.24871	1.61211	-0.311918		0.567931	0.423693	0.866067
	2.25105	1.6175	-0.311535		0.577379	0.42536	0.866665
	2.25397	1.6227	-0.311025		0.587079	0.426946	0.867035
	2.25747	1.62771	-0.3104		0.597002	0.428462	0.867187
	2.26153	1.63254	-0.309629		0.607134	0.4299	0.867108
	2.26615	1.6372	-0.308692		0.617477	0.431258	0.86679
	2.27134	1.64166	-0.307605		0.628049	0.432533	0.86625
	2.27705	1.64593	-0.30637		0.638833	0.433735	0.865499
	2.2833	1.65002	-0.305022		0.649839	0.434889	0.864533
	2.29009	1.65391	-0.30359		0.66104	0.435982	0.863351
	2.29744	1.6576	-0.302093		0.672414	0.437007	0.861959
	2.30536	1.66104	-0.300551		0.683941	0.437957	0.860348
	2.31383	1.66423	-0.298969		0.695688	0.438886	0.858522
	2.32285	1.66717	-0.297348		0.707658	0.439797	0.856476
	2.33241	1.6699	-0.295643		0.719831	0.440672	0.8542
	2.34248	1.67245	-0.293825		0.732211	0.441499	0.851684
	2.35305	1.67482	-0.29188		0.744781	0.442271	0.848934
	2.36408	1.67701	-0.289792		0.757503	0.442992	0.845949
	2.37554	1.67898	-0.287599		0.770376	0.443654	0.842754
	2.38744	1.68075	-0.285309		0.783429	0.444241	0.839351
	2.39974	1.68234	-0.282926		0.79665	0.444767	0.835705
	2.41239	1.68378	-0.280474		0.810014	0.445265	0.831824
	2.42541	1.68513	-0.277957		0.82353	0.445736	0.82772
	2.43878	1.68639	-0.275387		0.837216	0.446179	0.823448
	2.4525	1.68754	-0.272763		0.851073	0.446601	0.819004
	2.46652	1.68854	-0.27009		0.865066	0.447032	0.81436
	2.48081	1.68941	-0.267381		0.879171	0.447462	0.809543
	2.49535	1.69016	-0.264647		0.893372	0.447877	0.804563
	2.51013	1.69085	-0.261888		0.907677	0.448256	0.799426
	2.52514	1.69147	-0.25909		0.922056	0.448618	0.794129
	2.54033	1.69203	-0.256265		0.936505	0.448981	0.788674
	2.55565	1.69253	-0.253424		0.951028	0.449303	0.783052
	2.57109	1.69301	-0.250567		0.965625	0.449582	0.777258
	2.58659	1.69348	-0.247686		0.980303	0.449827	0.771345
	2.60212	1.69396	-0.244778		0.995042	0.450054	0.765323
	2.61768	1.69444	-0.241865		1.00984	0.450283	0.759195
	2.63325	1.69496	-0.238953		1.02472	0.450543	0.752968
	2.64882	1.69551	-0.236074		1.03969	0.450836	0.746651
	2.66435	1.69613	-0.233222		1.05472	0.451155	0.740277
	2.67979	1.69683	-0.230407		1.06981	0.451506	0.733849
	2.69514	1.69764	-0.227625		1.08488	0.451912	0.727362
	2.71037	1.69852	-0.224871		1.09989	0.452383	0.720828
	2.72543	1.69947	-0.22214		1.11484	0.452904	0.714241
	2.74033	1.70048	-0.219422		1.12974	0.453489	0.707597
	2.75504	1.70155	-0.216688		1.14458	0.454117	0.700919
	2.76958	1.70271	-0.21399		1.15939	0.454763	0.694191
	2.78398	1.70395	-0.211343		1.17411	0.455396	0.687385
	2.79819	1.70531	-0.208751		1.18873	0.456059	0.680499
	2.81218	1.70681	-0.206234		1.20323	0.456753	0.673592
	2.82598	1.70845	-0.203807		1.21759	0.457464	0.666686
	2.83957	1.71023	-0.201429		1.23179	0.458182	0.659783
	2.85294	1.71216	-0.199109		1.24581	0.458908	0.652899
	2.86608	1.71422	-0.196847		1.25963	0.459656	0.646053
	2.87899	1.71641	-0.194633		1.27328	0.460426	0.639254
	2.89164	1.71874	-0.192438		1.28677	0.461186	0.632514
	2.904	1.7212	-0.190273		1.30006	0.461909	0.625812
	2.91609	1.72384	-0.18816		1.31311	0.462595	0.619144
	2.9279	1.72666	-0.186109		1.32593	0.463223	0.612522
	2.93945	1.72965	-0.184108		1.33853	0.463784	0.605955
	2.95073	1.73282	-0.182159		1.35086	0.464268	0.599482
	2.96173	1.73615	-0.180263		1.36289	0.464686	0.593106
	2.97241	1.73967	-0.178425		1.37462	0.465069	0.586834
	2.98276	1.74337	-0.176669		1.38604	0.465407	0.580657
	2.99282	1.74725	-0.175009		1.39714	0.465672	0.574603
	3.00256	1.75135	-0.17342		1.40792	0.465874	0.568687
	3.012	1.75566	-0.171866		1.41838	0.465979	0.562924
	3.02111	1.76017	-0.170321		1.42849	0.465956	0.557315
	3.02988	1.7649	-0.168779		1.43824	0.465792	0.551855
	3.03832	1.76982	-0.167296		1.4476	0.465468	0.546573
	3.04639	1.77494	-0.165837		1.45658	0.465004	0.541479
	3.05405	1.78026	-0.164391		1.46517	0.464432	0.536583
	3.06131	1.78576	-0.162998		1.47339	0.463792	0.531898
	3.06817	1.79147	-0.161644		1.48123	0.463111	0.527455
	3.07467	1.79737	-0.160301		1.48867	0.462352	0.523253
	3.08081	1.80348	-0.158938		1.49569	0.461504	0.519289
	3.08659	1.80979	-0.157578		1.5023	0.460567	0.51556
	3.092	1.8163	-0.156213		1.5085	0.459533	0.512077
	3.09704	1.82301	-0.154843		1.51433	0.458412	0.508844
	3.10168	1.82993	-0.153459		1.51977	0.457204	0.505875
	3.10592	1.83708	-0.152053		1.52482	0.455896	0.503184
	3.10976	1.84447	-0.15061		1.52944	0.454482	0.500764
	3.11317	1.8521	-0.149131		1.53365	0.452955	0.498656
	3.11619	1.85996	-0.147615		1.53748	0.451314	0.496849
	3.11881	1.86804	-0.146058		1.54092	0.44954	0.495315
	3.12103	1.87636	-0.144466		1.54399	0.447636	0.494054
	3.12285	1.88492	-0.142832		1.54668	0.445641	0.493042
	3.12427	1.89372	-0.14118		1.54901	0.443558	0.492277
	3.12528	1.90273	-0.1395		1.55098	0.441398	0.491746
	3.12589	1.91191	-0.137805		1.55259	0.439131	0.491443
	3.12612	1.92129	-0.136085		1.55385	0.436742	0.491379
	3.12595	1.93084	-0.134355		1.55474	0.434226	0.491553
	3.12539	1.94058	-0.132586		1.55529	0.431594	0.491951
	3.12446	1.95049	-0.130768		1.55548	0.42885	0.492524
	3.12313	1.96058	-0.128903		1.55533	0.425979	0.493265
	3.12142	1.9708	-0.126986		1.55487	0.423018	0.494171
	3.11931	1.9812	-0.125008		1.55407	0.419986	0.495243
	3.11688	1.99173	-0.122965		1.55295	0.416833	0.496483
	3.11409	2.00243	-0.120859		1.55149	0.413572	0.497837
	3.11095	2.01327	-0.118677		1.54969	0.410203	0.499291
	3.10747	2.02425	-0.116387		1.54756	0.406701	0.500835
	3.10364	2.03532	-0.113989		1.54509	0.403036	0.502483
	3.09946	2.04648	-0.111465		1.54227	0.399197	0.504241
	3.09492	2.05771	-0.108801		1.53913	0.395183	0.506082
	3.09006	2.06901	-0.106008		1.53569	0.391002	0.507991
	3.08488	2.08037	-0.103108		1.53194	0.386651	0.509941
	3.07937	2.09178	-0.100108		1.5279	0.382123	0.511914
	3.07358	2.10327	-0.0970007		1.52357	0.377426	0.51391
	3.06752	2.11483	-0.0937766		1.51901	0.372544	0.515933
	3.06119	2.12644	-0.0904337		1.51421	0.367455	0.517985
	3.05462	2.13803	-0.0869699		1.50922	0.362149	0.520043
	3.0478	2.1496	-0.0833714		1.50402	0.356629	0.52209
	3.04075	2.16112	-0.079637		1.49863	0.35091	0.524152
	3.03347	2.17261	-0.0757482		1.49305	0.34501	0.526218
	3.02602	2.18404	-0.0717005		1.48729	0.338918	0.528272
	3.01839	2.19538	-0.0674877		1.48137	0.332637	0.530297
	3.01058	2.20661	-0.0631315		1.47532	0.326187	0.532304
	3.0026	2.21773	-0.0586072		1.46912	0.319554	0.534264
	2.99446	2.22872	-0.0539217		1.46274	0.312747	0.536193
	2.98616	2.23958	-0.0490744		1.45621	0.305755	0.538083
	2.97772	2.25025	-0.0440884		1.44953	0.298574	0.539935
	2.96912	2.26075	-0.0389972		1.4427	0.291224	0.54175
	2.96038	2.27104	-0.0337978		1.43575	0.283698	0.543568
	2.95154	2.28114	-0.0284531		1.42871	0.276004	0.545404
	2.94258	2.29102	-0.0229761		1.4216	0.268156	0.547261
	2.93353	2.30064	-0.0174025		1.41442	0.260211	0.549133
	2.92438	2.31002	-0.0117624		1.4072	0.252129	0.551017
	2.91514	2.31917	-0.00607278		1.39989	0.24388	0.552958
	2.90581	2.32807	-0.000322473		1.39243	0.235496	0.554957
	2.8964	2.33673	0.00549726		1.38485	0.226986	0.557039
	2.88696	2.34512	0.0113771		1.37715	0.218363	0.559183
	2.87749	2.35322	0.0173163		1.36933	0.209617	0.561383
	2.86799	2.36101	0.0232967		1.36144	0.200754	0.563609
	2.85846	2.36849	0.0293171		1.35349	0.191812	0.565899
	2.84888	2.37569	0.0353701		1.34546	0.182799	0.568298
	2.83926	2.38261	0.0414414		1.33736	0.173707	0.570806
	2.82964	2.38926	0.0475307		1.32919	0.164548	0.573451
	2.82004	2.39566	0.0536102		1.32095	0.155291	0.576247
	2.81046	2.40175	0.0596907		1.31264	0.145939	0.579188
	2.80087	2.40755	0.0657465		1.30428	0.13652	0.582264
	2.79125	2.41302	0.0717631		1.29588	0.127046	0.585508
	2.7816	2.41819	0.0777161		1.28741	0.117533	0.58888
	2.77192	2.42305	0.0835988		1.27894	0.107983	0.592371
	2.76221	2.4276	0.0894055		1.27051	0.098419	0.59597
	2.75249	2.43185	0.0951886		1.26209	0.0888486	0.599701
	2.74276	2.43579	0.100943		1.25363	0.0792667	0.603575
	2.73302	2.4394	0.106639		1.24509	0.0696427	0.607612
	2.7233	2.44269	0.112297		1.23652	0.0599904	0.611826
	2.71359	2.44566	0.117926		1.22794	0.0503312	0.616211
	2.70389	2.44828	0.123505		1.21936	0.0406703	0.620785
	2.69422	2.45058	0.129013		1.21074	0.0310096	0.625562
	2.68458	2.45254	0.134444		1.20204	0.0213474	0.630542
	2.67496	2.45415	0.139801		1.19326	0.0116694	0.635731
	2.66536	2.45538	0.14509		1.18439	0.00200636	0.64112
	2.6558	2.45624	0.150283		1.17546	-0.00765902	0.646698
	2.6463	2.45672	0.155369		1.16649	-0.017357	0.652466
	2.63684	2.45684	0.160332		1.15749	-0.0270745	0.658412
	2.62743	2.45656	0.165199		1.14842	-0.0367806	0.664557
	2.61807	2.45591	0.169972		1.1393	-0.0464665	0.670906
	2.60878	2.45488	0.174631		1.1301	-0.0560967	0.677451
	2.59957	2.45352	0.179151		1.12084	-0.0656586	0.68419
	2.59044	2.45181	0.183527		1.11152	-0.0751126	0.691119
	2.5814	2.44975	0.187755		1.10213	-0.0844569	0.698256
	2.57246	2.44736	0.191826		1.09268	-0.0937123	0.705601
	2.5636	2.4446	0.195732		1.08316	-0.102904	0.713134
	2.55479	2.44147	0.199463		1.07362	-0.112027	0.720821
	2.54605	2.43797	0.203011		1.06405	-0.121067	0.728663
	2.53734	2.43411	0.206384		1.05444	-0.130017	0.736662
	2.52867	2.42987	0.209588		1.04478	-0.138809	0.744836
	2.52004	2.42524	0.21262		1.03508	-0.147435	0.753172
	2.51145	2.42028	0.215461		1.02532	-0.155892	0.761628
	2.50293	2.415	0.218113		1.01553	-0.164176	0.770208
	2.49445	2.40938	0.220584		1.00574	-0.172293	0.778904
	2.48608	2.40347	0.222869		0.995952	-0.180274	0.787714
	2.47781	2.39725	0.224958		0.986161	-0.188152	0.796652
	2.46971	2.39078	0.226836		0.976405	-0.19589	0.805721
	2.46178	2.38403	0.228501		0.96671	-0.203474	0.814917
	2.45395	2.377	0.229931		0.957063	-0.210881	0.82424
	2.44621	2.36969	0.231149		0.947436	-0.21812	0.83366
	2.43857	2.3621	0.232151		0.937809	-0.225171	0.843171
	2.43105	2.35432	0.232948		0.928193	-0.232035	0.852745
	2.42366	2.34632	0.233543		0.918596	-0.23869	0.862374
	2.4164	2.33813	0.233941		0.909029	-0.245143	0.872081
	2.40924	2.32975	0.234139		0.899486	-0.251389	0.881861
	2.40221	2.32122	0.234145		0.889935	-0.257429	0.891688
	2.3953	2.3125	0.233955		0.880382	-0.263281	0.901565
	2.38855	2.3036	0.233567		0.870834	-0.26895	0.911476
	2.38194	2.29455	0.232986		0.861318	-0.274433	0.921441
	2.37548	2.28532	0.232219		0.851863	-0.279674	0.931433
	2.36917	2.27596	0.231293		0.842449	-0.284643	0.941406
	2.363	2.26653	0.230202		0.833064	-0.289338	0.951336
	2.35698	2.25705	0.228932		0.82373	-0.293778	0.961213
	2.35111	2.24754	0.2275		0.814433	-0.297944	0.97104
	2.34538	2.23801	0.225925		0.80514	-0.301828	0.980837
	2.33981	2.22845	0.224194		0.795851	-0.305423	0.990596
	2.33438	2.21891	0.222314		0.786575	-0.308734	1.0003
	2.32909	2.2094	0.220278		0.777366	-0.31176	1.00992
	2.32395	2.19996	0.218104		0.768272	-0.314529	1.01947
	2.31897	2.19058	0.215817		0.759277	-0.317043	1.02894
	2.31414	2.18129	0.213425		0.750378	-0.319293	1.03827
	2.30949	2.17213	0.210942		0.741586	-0.32129	1.04741
	2.30502	2.16314	0.208371		0.732887	-0.32302	1.05635
	2.30074	2.15429	0.205729		0.724294	-0.324477	1.06508
	2.29665	2.14559	0.203		0.715852	-0.325643	1.07359
	2.29274	2.13704	0.200209		0.707544	-0.326501	1.0819
	2.28903	2.12868	0.197344		0.69939	-0.327032	1.08994
	2.2855	2.12049	0.194435		0.691395	-0.327259	1.09768
	2.28213	2.11251	0.19147		0.683584	-0.327182	1.10512
	2.27894	2.10474	0.188453		0.675959	-0.32682	1.11226
	2.27595	2.09718	0.18538		0.668534	-0.326176	1.1191
	2.27316	2.08983	0.18227		0.661316	-0.325256	1.12568
	2.27058	2.08273	0.179142		0.654314	-0.324052	1.13198
	2.26818	2.07585	0.176009		0.647534	-0.322577	1.13795
	2.266	2.06924	0.172861		0.640968	-0.320809	1.14358
	2.264	2.0629	0.169688		0.634644	-0.31874	1.14888
	2.26219	2.05683	0.166501		0.628616	-0.31636	1.1538
	2.26058	2.05108	0.163311		0.622896	-0.313688	1.1583
	2.25915	2.04564	0.160135		0.617465	-0.310759	1.16237
	2.25791	2.04051	0.156984		0.612311	-0.307573	1.16604
	2.25689	2.0357	0.153867		0.607476	-0.30414	1.16931
	2.25605	2.03124	0.150796		0.603005	-0.300478	1.17217
	2.25544	2.02712	0.147807		0.598902	-0.296575	1.17462
	2.25501	2.02334	0.144882		0.595169	-0.292438	1.17665
	2.25477	2.01992	0.142047		0.591805	-0.288069	1.17824
	2.25471	2.01683	0.139309		0.588796	-0.283484	1.17939
	2.25486	2.0141	0.136662		0.586194	-0.278637	1.18011
	2.25524	2.01171	0.1341		0.583986	-0.273524	1.18043
	2.2558	2.0097	0.131622		0.582157	-0.268145	1.18034
	2.25656	2.00806	0.129241		0.580693	-0.262536	1.17984
	2.25752	2.00682	0.126966		0.579608	-0.256676	1.17892
	2.2587	2.00597	0.124823		0.578923	-0.250585	1.1776
	2.26006	2.00553	0.122793		0.57863	-0.244268	1.17589
	2.2616	2.00549	0.120873		0.578712	-0.237729	1.17381
	2.2633	2.00582	0.119056		0.579174	-0.230982	1.17133
	2.26517	2.00651	0.11739		0.580049	-0.224024	1.16844
	2.2672	2.00759	0.115858		0.581348	-0.216863	1.16517
	2.26944	2.00904	0.114461		0.58309	-0.20946	1.16154
	2.27187	2.01086	0.11317		0.585259	-0.201826	1.15758
	2.27449	2.01305	0.111988		0.587798	-0.193954	1.15328
	2.27728	2.0156	0.11093		0.590674	-0.185862	1.14866
	2.28024	2.01854	0.110016		0.593888	-0.177561	1.14372
	2.28336	2.02187	0.109238		0.597451	-0.169097	1.13848
	2.28667	2.02562	0.108607		0.601366	-0.160466	1.13291
	2.29018	2.02974	0.108118		0.605615	-0.151669	1.12704
	2.2939	2.03425	0.107793		0.610198	-0.142699	1.12086
	2.29781	2.03914	0.107625		0.615101	-0.13355	1.11439
	2.30188	2.04444	0.107615		0.62034	-0.124246	1.10765
	2.3061	2.05009	0.107765		0.625912	-0.114792	1.10064
	2.31044	2.05607	0.108084		0.631798	-0.105191	1.0934
	2.31488	2.06238	0.108549		0.637975	-0.0954364	1.08593
	2.31938	2.06904	0.109161		0.644455	-0.0855793	1.07826
	2.32398	2.07602	0.109943		0.651203	-0.0756571	1.07041
	2.32867	2.08334	0.110896		0.658241	-0.065672	1.06239
	2.33351	2.091	0.112021		0.665553	-0.0556442	1.05422
	2.33846	2.09897	0.11331		0.673107	-0.0455506	1.04592
	2.34352	2.10723	0.114779		0.680901	-0.0353752	1.0375
	2.34867	2.11576	0.116411		0.688903	-0.0251065	1.02898
	2.35392	2.12456	0.1182		0.697139	-0.0147867	1.02037
	2.35927	2.13363	0.120154		0.705615	-0.00445217	1.01168
	2.3647	2.14292	0.12227		0.714291	0.00588777	1.00293
	2.37019	2.15247	0.124539		0.723118	0.0162292	0.994156
	2.37575	2.16229	0.126962		0.7321	0.0265846	0.98536
	2.38135	2.17241	0.129522		0.74123	0.0369414	0.976542
	2.38698	2.1828	0.132217		0.750477	0.0472869	0.967712
	2.39266	2.19343	0.135045		0.75983	0.0576128	0.958882
	2.39836	2.20425	0.13799		0.769254	0.0679374	0.950058
	2.40409	2.21524	0.141046		0.778705	0.0783155	0.941265
	2.40981	2.22641	0.144229		0.788186	0.0887177	0.932502
	2.41553	2.23775	0.147545		0.797687	0.0991153	0.923783
	2.42122	2.24924	0.151012		0.807178	0.109466	0.915113
	2.42684	2.2609	0.154624		0.816645	0.119731	0.906493
	2.43239	2.27277	0.158392		0.826085	0.129923	0.897972
	2.43789	2.28483	0.162286		0.835493	0.140021	0.889553
	2.44332	2.29708	0.166315		0.844855	0.150016	0.88125
	2.44868	2.30942	0.170443		0.854134	0.159919	0.873054
	2.45399	2.32186	0.174654		0.863294	0.16974	0.86498
	2.45925	2.33438	0.178942		0.872335	0.179462	0.85703
	2.46441	2.34698	0.183298		0.881254	0.189093	0.849248
	2.46944	2.35965	0.187747		0.890036	0.198628	0.841637
	2.47433	2.37236	0.192313		0.898619	0.208035	0.834203
	2.47905	2.38511	0.196999		0.906993	0.217321	0.826934
	2.48366	2.39791	0.201801		0.915152	0.226455	0.819843
	2.48816	2.41075	0.206708		0.923086	0.235435	0.812928
	2.49259	2.42364	0.211707		0.930784	0.244273	0.806157
	2.49687	2.43658	0.216787		0.938243	0.25298	0.799521
	2.50104	2.44953	0.22195		0.945464	0.261586	0.793009
	2.50507	2.4625	0.227187		0.952414	0.270068	0.786663
	2.50891	2.47547	0.232485		0.959072	0.278406	0.780516
	2.51259	2.48841	0.237842		0.965402	0.286554	0.774572
	2.51612	2.50132	0.243254		0.971406	0.294489	0.768819
	2.51948	2.51422	0.248721		0.977078	0.302228	0.76327
	2.52268	2.52708	0.254233		0.982397	0.30976	0.757902
	2.52572	2.53992	0.259809		0.987332	0.3171	0.752738
	2.52858	2.55271	0.265443		0.99186	0.324248	0.747792
	2.53126	2.56543	0.271118		0.995988	0.331206	0.743047
	2.53378	2.57807	0.276832		0.999706	0.337959	0.738512
	2.53613	2.59063	0.282589		1.003	0.344501	0.734178
	2.53835	2.6031	0.288402		1.00583	0.350825	0.730055
	2.54047	2.61549	0.294279		1.0082	0.356931	0.726136
	2.54247	2.62779	0.300237		1.01012	0.362775	0.722386
	2.54438	2.63998	0.306274		1.0116	0.368395	0.718801
	2.54616	2.65205	0.312366		1.01259	0.373825	0.715365
	2.54782	2.66394	0.318489		1.01303	0.379069	0.712086
	2.54938	2.67565	0.324668		1.01291	0.384143	0.708971
	2.55084	2.68716	0.330907		1.01224	0.38903	0.70603
	2.55217	2.69847	0.337221		1.01107	0.393729	0.703256
	2.5534	2.70957	0.343591		1.00936	0.398242	0.700673
	2.55454	2.72046	0.349999		1.00711	0.402566	0.698273
	2.55559	2.73115	0.356438		1.0043	0.406712	0.696029
	2.55649	2.74162	0.362928		1.0009	0.410684	0.69394
	2.55724	2.75188	0.369456		0.996946	0.414456	0.69202
	2.55782	2.76189	0.37602		0.992412	0.41803	0.690279
	2.55825	2.77165	0.382586		0.987333	0.42144	0.68872
	2.55852	2.78113	0.389164		0.98174	0.424694	0.687339
	2.55863	2.79031	0.395761		0.975648	0.427806	0.686143
	2.55859	2.79919	0.402382		0.969073	0.430798	0.685103
	2.55839	2.80776	0.409036		0.962048	0.433689	0.684226
	2.55805	2.81601	0.415707		0.95458	0.436467	0.683499
	2.55756	2.82393	0.42239		0.946624	0.439113	0.682916
	2.55688	2.83152	0.429082		0.938178	0.441625	0.682453
	2.55602	2.83879	0.435778		0.929272	0.444014	0.682097
	2.55494	2.84575	0.442455		0.919938	0.446286	0.681868
	2.5537	2.85237	0.449102		0.910221	0.448455	0.681763
	2.55226	2.85868	0.455709		0.900108	0.450533	0.681775
	2.55064	2.86466	0.462278		0.889621	0.452507	0.681886
	2.54883	2.87032	0.468842		0.878739	0.454343	0.68208
	2.54684	2.87567	0.475403		0.867501	0.456056	0.682359
	2.5447	2.8807	0.481965		0.855958	0.457645	0.682737
	2.54239	2.88539	0.488517		0.844124	0.459098	0.683209
	2.53994	2.88975	0.495059		0.832025	0.460415	0.683749
	2.53732	2.89378	0.501599		0.819663	0.461585	0.684309
	2.53455	2.89752	0.508141		0.807089	0.462622	0.684878
	2.53161	2.90096	0.514685		0.794312	0.463545	0.685439
	2.52854	2.9041	0.521213		0.781349	0.464353	0.685994
	2.52531	2.90691	0.527707		0.76822	0.465036	0.686553
	2.52192	2.90941	0.534146		0.754956	0.465603	0.687121
	2.51838	2.91156	0.540505		0.74159	0.466073	0.687682
	2.51471	2.91336	0.546767		0.728149	0.466446	0.688226
	2.51094	2.91482	0.552953		0.714688	0.466734	0.688728
	2.50707	2.91595	0.559067		0.701261	0.466894	0.689189
	2.5031	2.91678	0.565079		0.687872	0.466928	0.689613
	2.49905	2.91729	0.57099		0.674549	0.466809	0.68998
	2.49489	2.91749	0.576791		0.661306	0.466545	0.690273
	2.49065	2.91738	0.582449		0.648156	0.466146	0.690494
	2.48635	2.91695	0.587948		0.635104	0.465628	0.69062
	2.48201	2.91621	0.593252		0.622197	0.464994	0.690662
	2.47764	2.91517	0.598344		0.609419	0.464217	0.690632
	2.4732	2.91377	0.603212		0.596803	0.463327	0.690484
	2.46869	2.91202	0.60784		0.584385	0.462328	0.690201
	2.46413	2.90998	0.612209		0.572205	0.461194	0.689779
	2.45955	2.90763	0.616331		0.560263	0.459921	0.689259
	2.45497	2.90497	0.620196		0.548564	0.458476	0.688627
	2.45038	2.90202	0.623795		0.537138	0.456858	0.687885
	2.44577	2.89877	0.627135		0.526019	0.455063	0.687047
	2.44116	2.89524	0.630217		0.515228	0.453101	0.686127
	2.43655	2.89142	0.63302		0.504739	0.450962	0.685124
	2.43196	2.8873	0.635519		0.494584	0.448656	0.68401
	2.42743	2.88288	0.637706		0.484785	0.446186	0.682785
	2.42299	2.87812	0.639577		0.475377	0.443552	0.681492
	2.41862	2.87305	0.641138		0.466383	0.440771	0.680132
	2.41434	2.86766	0.642374		0.457816	0.43785	0.678712
	2.41012	2.86195	0.643282		0.449683	0.43477	0.677243
	2.40596	2.85593	0.64386		0.442	0.431565	0.675695
	2.40187	2.84962	0.644103		0.434803	0.428244	0.674045
	2.39788	2.84302	0.643994		0.428093	0.424789	0.672318
	2.39399	2.83611	0.643533		0.421843	0.421206	0.670534
	2.39022	2.82893	0.642757		0.416057	0.417475	0.668688
	2.38658	2.82147	0.641652		0.410732	0.413628	0.666826
	2.38311	2.81374	0.64024		0.405863	0.409687	0.664976
	2.37979	2.80573	0.638522		0.401464	0.405646	0.663137
	2.37665	2.79746	0.636515		0.397515	0.4015	0.661323
	2.37366	2.78893	0.63422		0.394037	0.397247	0.659542
	2.37085	2.78017	0.63164		0.391044	0.392899	0.657794
	2.36827	2.77122	0.628777		0.38854	0.388467	0.656122
	2.36588	2.76208	0.625631		0.386554	0.383949	0.654515
	2.36372	2.75277	0.622195		0.385092	0.379348	0.653
	2.3618	2.74332	0.618484		0.384151	0.374658	0.651573
	2.36014	2.73374	0.614498		0.383813	0.369912	0.650233
	2.35871	2.72405	0.610226		0.384071	0.365129	0.649008
	2.35754	2.71426	0.605685		0.384885	0.360318	0.647892
	2.35663	2.7044	0.600876		0.386247	0.355507	0.646909
	2.35598	2.69449	0.595804		0.388111	0.3507	0.64604
	2.3556	2.68454	0.590457		0.390501	0.345899	0.645272
	2.3555	2.67453	0.584844		0.393407	0.341108	0.64461
	2.35564	2.66448	0.578962		0.396849	0.336328	0.644039
	2.35604	2.65438	0.572808		0.400821	0.331554	0.64357
	2.35673	2.64424	0.566385		0.405323	0.326811	0.643191
	2.35769	2.6341	0.559691		0.410385	0.322126	0.642906
	2.35892	2.62396	0.552721		0.416009	0.317508	0.642714
	2.36043	2.61387	0.545472		0.4222	0.31296	0.642632
	2.36221	2.60381	0.537985		0.428951	0.308483	0.64266
	2.36422	2.59376	0.53025		0.436244	0.304068	0.642797
	2.36651	2.58374	0.522255		0.444063	0.299707	0.643041
	2.36914	2.57378	0.514004		0.452348	0.295411	0.643382
	2.37212	2.56389	0.505497		0.461101	0.291163	0.643817
	2.37543	2.55406	0.496741		0.470362	0.28696	0.644337
	2.37905	2.54433	0.487706		0.480104	0.282815	0.644957
	2.38295	2.5347	0.478372		0.490312	0.278708	0.645676
	2.38719	2.52518	0.468725		0.500988	0.274665	0.646507
	2.39176	2.51574	0.45879		0.512144	0.27071	0.64745
	2.39666	2.50644	0.448568		0.523762	0.266836	0.648485
	2.40189	2.49728	0.438068		0.535829	0.263021	0.649613
	2.40744	2.48826	0.427322		0.548287	0.25928	0.650828
	2.41326	2.47936	0.416329		0.56112	0.255593	0.65212
	2.4194	2.47061	0.405101		0.574321	0.251995	0.653497
	2.42585	2.46202	0.393684		0.587897	0.24849	0.654965
	2.43265	2.45356	0.382123		0.601805	0.245056	0.656524
	2.43977	2.44526	0.370411		0.61605	0.241663	0.658149
	2.44725	2.43717	0.358544		0.630628	0.238311	0.65984
	2.45502	2.42925	0.346509		0.645526	0.235028	0.661611
	2.46312	2.42154	0.334332		0.660735	0.231839	0.663471
	2.47155	2.41404	0.32208		0.676206	0.228717	0.665426
	2.48031	2.40675	0.30975		0.691921	0.225656	0.66748
	2.48936	2.39966	0.297346		0.707831	0.222687	0.669626
	2.49866	2.3928	0.284874		0.723903	0.219827	0.671852
	2.50819	2.38619	0.272355		0.740101	0.217106	0.674149
	2.51794	2.37982	0.259794		0.756411	0.214503	0.676552
	2.5279	2.3737	0.247226		0.772813	0.211994	0.679079
	2.5381	2.36782	0.234697		0.789276	0.20956	0.681732
	2.5485	2.36217	0.222196		0.805767	0.207206	0.684506
	2.55912	2.3568	0.209721		0.822237	0.204934	0.687398
	2.56994	2.35171	0.197306		0.838682	0.20275	0.690375
	2.58093	2.34691	0.184968		0.855079	0.200645	0.693447
	2.59213	2.3424	0.172741		0.871437	0.198624	0.696602
	2.60351	2.33818	0.160621		0.887717	0.196708	0.699838
	2.61507	2.33425	0.148631		0.903882	0.194892	0.703144
	2.62676	2.33061	0.136787		0.919932	0.193148	0.706536
	2.63857	2.32728	0.125118		0.935837	0.191469	0.71003
	2.6505	2.32422	0.113609		0.951549	0.189869	0.713661
	2.66255	2.32147	0.102272		0.967081	0.188355	0.717431
	2.67472	2.31903	0.0911143		0.982384	0.186902	0.721328
	2.687	2.3169	0.0801575		0.997442	0.185522	0.725322
	2.69938	2.31511	0.0693936		1.01224	0.184223	0.729394
	2.71181	2.31365	0.0588257		1.02674	0.183	0.733574
	2.72431	2.31253	0.0484915		1.0409	0.181851	0.737852
	2.73685	2.31173	0.0384137		1.05473	0.180786	0.742213
	2.74942	2.31121	0.0285882		1.0682	0.179793	0.746646
	2.76201	2.31096	0.0190086		1.08126	0.178874	0.751147
	2.77461	2.31099	0.00966737		1.09386	0.178026	0.755719
	2.78724	2.31131	0.000620972		1.10604	0.177265	0.760377
	2.79987	2.31195	-0.00810987		1.11778	0.17659	0.765138
	2.81251	2.31291	-0.0165276		1.12908	0.175972	0.770007
	2.82515	2.31418	-0.0246348		1.13991	0.175406	0.774972
	2.83772	2.31574	-0.032392		1.15027	0.174894	0.780025
	2.85022	2.31759	-0.039818		1.16011	0.174446	0.785148
	2.86266	2.31974	-0.0469134		1.16945	0.174068	0.790367
	2.87501	2.32218	-0.0536757		1.17828	0.173807	0.795658
	2.88728	2.32486	-0.0600804		1.18658	0.173686	0.801011
	2.89944	2.32779	-0.0661202		1.1943	0.173683	0.806438
	2.9115	2.33094	-0.0717965		1.20149	0.173784	0.811921
	2.92342	2.3343	-0.0771094		1.20816	0.17399	0.817461
	2.93521	2.33789	-0.0820546		1.21431	0.174239	0.823064
	2.94685	2.34169	-0.0866078		1.2199	0.174521	0.828714
	2.95834	2.3457	-0.0907839		1.2249	0.174849	0.834407
	2.96965	2.34991	-0.0945711		1.22929	0.175214	0.840165
	2.98079	2.35425	-0.097977		1.23304	0.175604	0.845986
	2.99172	2.35877	-0.101006		1.23613	0.176026	0.851863
	3.0024	2.36345	-0.103636		1.2386	0.17649	0.857807
	3.01282	2.36829	-0.105863		1.24043	0.176987	0.863809
	3.02297	2.37329	-0.107695		1.24162	0.177507	0.869866
	3.03284	2.37838	-0.109105		1.24217	0.178057	0.87596
	3.04243	2.38355	-0.110091		1.2421	0.178621	0.88208
	3.05177	2.38877	-0.110687		1.24138	0.179179	0.888231
	3.06085	2.39404	-0.110878		1.24003	0.179723	0.894401
	3.06967	2.39937	-0.110663		1.23807	0.180254	0.900593
	3.07823	2.40476	-0.110045		1.23551	0.180757	0.906801
	3.08653	2.41018	-0.109029		1.23237	0.181218	0.913032
	3.09457	2.41565	-0.107639		1.22864	0.181617	0.919294
	3.10233	2.42118	-0.10588		1.22435	0.181964	0.925584
	3.10982	2.42679	-0.103746		1.21947	0.182248	0.931898
	3.11701	2.43247	-0.101227		1.21402	0.182467	0.938244
	3.1239	2.43821	-0.0982784		1.20802	0.182595	0.944622
	3.13047	2.44396	-0.0949349		1.20143	0.182617	0.951043
	3.1367	2.44975	-0.0912104		1.19427	0.182526	0.957516
	3.14261	2.45552	-0.0871159		1.1866	0.182317	0.96404
	3.14821	2.46128	-0.082661		1.17845	0.181995	0.970602
	3.15353	2.46701	-0.0778434		1.1698	0.181545	0.977195
	3.1586	2.47271	-0.0726792		1.16069	0.180959	0.98385
	3.16342	2.47835	-0.0671713		1.15111	0.180237	0.990564
	3.16799	2.48395	-0.0613171		1.1411	0.179377	0.997333
	3.17232	2.48952	-0.0551344		1.13065	0.17837	1.00414
	3.17639	2.49506	-0.048635		1.11978	0.177185	1.011
	3.18018	2.50054	-0.0418401		1.1085	0.175862	1.01788
	3.18369	2.50593	-0.0347456		1.09684	0.174388	1.0248
	3.18694	2.51124	-0.0273745		1.08482	0.172737	1.03177
	3.18994	2.51645	-0.0197572		1.07245	0.170897	1.03876
	3.19277	2.52157	-0.0118794		1.05978	0.16886	1.04582
	3.19547	2.52662	-0.00375907		1.0468	0.16664	1.05294
	3.19803	2.53152	0.00457232		1.03357	0.164266	1.0601
	3.20045	2.5363	0.0131073		1.02008	0.161729	1.0673
	3.2027	2.54094	0.0218267		1.00635	0.159056	1.07451
	3.2048	2.54544	0.0306987		0.99239	0.156243	1.08173
	3.20678	2.54977	0.039685		0.978215	0.153273	1.08899
	3.20865	2.55394	0.0487561		0.963834	0.150123	1.09627
	3.2104	2.55796	0.0579141		0.949245	0.146805	1.10359
	3.21201	2.56178	0.0671372		0.934467	0.14332	1.11092
	3.21352	2.5654	0.0764097		0.919513	0.139673	1.11823
	3.21491	2.56876	0.0857242		0.904381	0.135905	1.12548
	3.21622	2.57185	0.0950483		0.889097	0.131991	1.1327
	3.21743	2.57468	0.104365		0.873696	0.127966	1.13989
	3.21854	2.57724	0.113662		0.858187	0.123848	1.14703
	3.21956	2.57956	0.122927		0.84264	0.119648	1.15412
	3.2205	2.58162	0.132147		0.827086	0.115361	1.16115
	3.22137	2.58342	0.141286		0.811515	0.110983	1.16811
	3.22216	2.585	0.150326		0.795927	0.106492	1.17499
	3.22287	2.58633	0.159262		0.780332	0.101877	1.18178
	3.22349	2.58739	0.168073		0.764748	0.0971647	1.18844
	3.22406	2.58818	0.176716		0.749166	0.0923754	1.19495
	3.22453	2.58868	0.185187		0.733602	0.0875022	1.20129
	3.22493	2.58891	0.193436		0.718078	0.0825614	1.20746
	3.22525	2.58885	0.201475		0.702613	0.0775565	1.21344
	3.22551	2.58852	0.209299		0.687255	0.0724564	1.2192
	3.22569	2.58793	0.216871		0.672001	0.0672867	1.22473
	3.22579	2.58707	0.224197		0.656858	0.062071	1.22998
	3.22585	2.58596	0.231266		0.641821	0.0568119	1.23495
	3.22583	2.58457	0.238057		0.626927	0.0515052	1.2396
	3.22572	2.58289	0.244541		0.612196	0.0461616	1.24391
	3.22551	2.58092	0.250705		0.597633	0.040789	1.24787
	3.22519	2.57862	0.256551		0.583195	0.0353535	1.25145
	3.2248	2.57605	0.262102		0.568892	0.0298524	1.25467
	3.22436	2.57316	0.267333		0.55473	0.0243088	1.25751
	3.22387	2.56997	0.272233		0.540718	0.0187032	1.2599
	3.2233	2.56648	0.276766		0.526906	0.0130461	1.26187
	3.22264	2.56269	0.280941		0.513314	0.00736457	1.26338
	3.2219	2.55862	0.284752		0.499961	0.001679	1.26439
	3.22111	2.55429	0.288219		0.486844	-0.00399773	1.26491
	3.22024	2.5497	0.291331		0.473956	-0.00967279	1.26494
	3.21932	2.54491	0.294088		0.461314	-0.0153592	1.26446
	3.21832	2.53988	0.296447		0.44894	-0.0210387	1.26348
	3.21724	2.53464	0.298408		0.436808	-0.0267096	1.26195
	3.21609	2.52917	0.299958		0.424928	-0.0324051	1.25983
	3.21486	2.52344	0.301096		0.413334	-0.0380868	1.25713
	3.21354	2.51744	0.301814		0.402031	-0.0437283	1.25385
	3.21216	2.51118	0.302119		0.391033	-0.0493405	1.25001
	3.2107	2.50467	0.302013		0.380348	-0.0549166	1.24561
	3.20915	2.49788	0.301493		0.369992	-0.0604506	1.24067
	3.20753	2.49081	0.300564		0.359974	-0.06594	1.23517
	3.20582	2.48347	0.299233		0.350296	-0.0713656	1.22911
	3.20403	2.47587	0.297469		0.340945	-0.0766982	1.22247
	3.20216	2.46798	0.295272		0.331898	-0.0819337	1.21525
	3.20026	2.45985	0.292654		0.323164	-0.0870605	1.20747
	3.19835	2.45148	0.289634		0.314745	-0.0920619	1.19917
	3.19645	2.44286	0.286226		0.306608	-0.0969375	1.19033
	3.19453	2.43398	0.282423		0.298761	-0.101703	1.18098
	3.19258	2.42477	0.278216		0.291214	-0.106373	1.17116
	3.19057	2.41528	0.273643		0.283976	-0.110921	1.16087
	3.18852	2.40548	0.268734		0.277051	-0.115316	1.15013
	3.18641	2.39541	0.26348		0.270438	-0.119534	1.13895
	3.18426	2.38507	0.257895		0.264145	-0.123567	1.12734
	3.18206	2.3744	0.251958		0.258153	-0.12739	1.11532
	3.17982	2.36342	0.24569		0.252466	-0.130995	1.10293
	3.17751	2.35213	0.239116		0.247069	-0.134384	1.0902
	3.17514	2.34059	0.23223		0.241983	-0.137548	1.07715
	3.1727	2.32879	0.225048		0.237196	-0.140426	1.06378
	3.17019	2.31674	0.217591		0.232711	-0.143023	1.05005
	3.16763	2.30447	0.209875		0.22855	-0.145354	1.036
	3.16504	2.29198	0.201881		0.224722	-0.147414	1.02164
	3.16242	2.27927	0.193606		0.221219	-0.149203	1.00696
	3.15977	2.26635	0.185063		0.218022	-0.150695	0.991991
	3.15715	2.25322	0.176265		0.215127	-0.151859	0.976754
	3.15456	2.23987	0.167207		0.21252	-0.152654	0.961308
	3.15196	2.22633	0.157903		0.210206	-0.153087	0.94567
	3.14929	2.21256	0.148378		0.20816	-0.153156	0.929872
	3.14653	2.19857	0.138661		0.206383	-0.152858	0.913909
	3.14372	2.18437	0.12876		0.2049	-0.15222	0.897808
	3.14082	2.16997	0.118677		0.203685	-0.151263	0.881592
	3.13786	2.15542	0.108446		0.202726	-0.149967	0.865261
	3.13488	2.14073	0.0980869		0.201988	-0.148324	0.848858
	3.13187	2.12592	0.0875755		0.20144	-0.146305	0.83238
	3.12887	2.11098	0.0769393		0.201068	-0.143917	0.815824
	3.12585	2.09591	0.066153		0.200892	-0.14113	0.799229
	3.12281	2.0807	0.0552166		0.200913	-0.137947	0.782639
	3.11972	2.06536	0.0441467		0.201111	-0.134363	0.766024
	3.1166	2.04988	0.0329442		0.201477	-0.130418	0.74939
	3.11347	2.03428	0.0216354		0.202015	-0.126114	0.73277
	3.11034	2.01854	0.0102499		0.202697	-0.121458	0.716162
	3.10719	2.00268	-0.00120062		0.20351	-0.116449	0.699609
	3.10405	1.98669	-0.012729		0.204427	-0.111078	0.68312
	3.10091	1.97058	-0.0243316		0.205441	-0.105355	0.666694
	3.09777	1.95437	-0.0359925		0.206487	-0.0993007	0.650343
	3.0946	1.93805	-0.04769		0.207557	-0.0929215	0.634089
	3.0914	1.92164	-0.0594047		0.208658	-0.0862144	0.61796
	3.0882	1.90512	-0.0711176		0.20978	-0.0791888	0.601989
	3.085	1.88849	-0.0828209		0.210954	-0.0718349	0.586196
	3.08182	1.87174	-0.0945165		0.212116	-0.0641867	0.57057
	3.07865	1.85487	-0.106207		0.213234	-0.0562834	0.555107
	3.07549	1.83793	-0.117863		0.214282	-0.0481501	0.539802
	3.0723	1.82092	-0.129497		0.215272	-0.0397726	0.524657
	3.0691	1.80386	-0.141086		0.216178	-0.0311286	0.509689
	3.06589	1.78673	-0.15264		0.216966	-0.0222331	0.494933
	3.06268	1.76955	-0.16414		0.217634	-0.0130969	0.480371
	3.05946	1.75234	-0.175575		0.218167	-0.0037215	0.466007
	3.05624	1.7351	-0.186923		0.21854	0.0058539	0.45185
	3.05303	1.7178	-0.198185		0.218742	0.0156088	0.437915
	3.04983	1.70046	-0.209332		0.218751	0.0255264	0.424212
	3.04667	1.68306	-0.220319		0.218552	0.0355941	0.410782
	3.04354	1.66562	-0.231138		0.218162	0.0458088	0.397618
	3.0404	1.64818	-0.241799		0.21758	0.0561618	0.384723
	3.0373	1.63076	-0.252296		0.216834	0.0666587	0.372093
	3.03421	1.61332	-0.262619		0.215897	0.0772716	0.35972
	3.03119	1.59595	-0.272764		0.214767	0.0880012	0.34763
	3.0282	1.57867	-0.282719		0.213445	0.09883	0.335869
	3.02527	1.56147	-0.29249		0.211926	0.10974	0.324448
	3.02237	1.54437	-0.302067		0.210156	0.120756	0.313363
	3.01953	1.52734	-0.311428		0.208122	0.131868	0.302584
	3.01673	1.51042	-0.320558		0.205818	0.14308	0.292126
	3.014	1.49358	-0.329457		0.203264	0.154374	0.282007
	3.01135	1.47683	-0.338139		0.200474	0.165772	0.272253
	3.00877	1.46018	-0.34661		0.197459	0.177257	0.262881
	3.00625	1.44368	-0.354872		0.19419	0.188805	0.253883
	3.0038	1.42735	-0.362901		0.190659	0.200404	0.245262
	3.0014	1.41123	-0.3707		0.1869	0.212054	0.237031
	2.99904	1.39529	-0.378245		0.18296	0.223732	0.229184
	2.99671	1.37959	-0.385525		0.178849	0.235442	0.22172
	2.99444	1.36408	-0.392535		0.17455	0.247159	0.214655
	2.99225	1.34881	-0.399258		0.170053	0.258875	0.207996
	2.9902	1.33378	-0.405688		0.165402	0.270586	0.201742
	2.98827	1.31897	-0.41183		0.160599	0.282274	0.195918
	2.98646	1.30443	-0.417715		0.155645	0.293927	0.190504
	2.98478	1.29015	-0.423294		0.150574	0.305536	0.185511
	2.98322	1.27615	-0.42858		0.145409	0.317126	0.18091
	2.98182	1.26242	-0.433575		0.140183	0.328675	0.176707
	2.98054	1.24899	-0.438251		0.134896	0.340141	0.172883
	2.97941	1.23586	-0.442599		0.129558	0.351536	0.169439
	2.97845	1.22309	-0.446624		0.124157	0.362815	0.166404
	2.97767	1.21066	-0.450352		0.118745	0.373963	0.163774
	2.97708	1.19857	-0.453784		0.113347	0.384992	0.161562
	2.97666	1.18681	-0.456893		0.107983	0.395899	0.159755
	2.97641	1.17537	-0.459699		0.102684	0.406658	0.15834
	2.97631	1.16429	-0.462193		0.0974541	0.41725	0.157308
	2.97637	1.15358	-0.464402		0.0923235	0.427658	0.15665
	2.97659	1.14324	-0.466353		0.0873109	0.437891	0.156351
	2.97697	1.13326	-0.468022		0.0824381	0.447916	0.15641
	2.97759	1.12366	-0.469389		0.077715	0.45771	0.156836
	2.97842	1.11443	-0.470449		0.0731834	0.467281	0.157624
	2.97947	1.10561	-0.471196		0.068864	0.476642	0.158759
	2.98072	1.09719	-0.47165		0.064751	0.485813	0.160236
	2.98216	1.08913	-0.471849		0.0608636	0.494817	0.162069
	2.9838	1.08141	-0.471815		0.057211	0.503611	0.164259
	2.98561	1.07408	-0.471558		0.053834	0.512148	0.166786
	2.98758	1.06713	-0.471081		0.0507898	0.520419	0.169628
	2.98973	1.06057	-0.470407		0.0480527	0.528437	0.172791
	2.99209	1.05441	-0.469557		0.0456265	0.536215	0.176268
	2.99467	1.04862	-0.468552		0.0435142	0.543736	0.180081
	2.99746	1.04319	-0.467406		0.0417286	0.550986	0.184229
	3.00045	1.03811	-0.466104		0.0403261	0.557954	0.188715
	3.0036	1.03337	-0.464641		0.039348	0.56463	0.193512
	3.00694	1.02898	-0.463053		0.038791	0.571031	0.19861
	3.01048	1.02493	-0.461339		0.0386603	0.577156	0.204021
	3.01424	1.02118	-0.459518		0.0389446	0.583006	0.20974
	3.01825	1.01777	-0.45761		0.0396238	0.588585	0.215765
	3.02251	1.01468	-0.455621		0.0407279	0.593893	0.222086
	3.02698	1.01192	-0.45356		0.0422575	0.598932	0.228686
	3.03167	1.00948	-0.45143		0.0442461	0.60366	0.235583
	3.03655	1.00734	-0.44924		0.0466938	0.608098	0.242803
	3.04161	1.0055	-0.446994		0.0495856	0.612217	0.250325
	3.04684	1.00391	-0.444661		0.0529054	0.616003	0.258163
	3.05222	1.00256	-0.44226		0.0566528	0.61948	0.266306
	3.05772	1.00146	-0.439784		0.0608391	0.622648	0.274776
	3.06334	1.00059	-0.437227		0.0654749	0.625504	0.283575
	3.06912	0.999925	-0.43461		0.070561	0.628072	0.292714
	3.07503	0.999466	-0.43196		0.0760871	0.630337	0.302159
	3.08105	0.999243	-0.429268		0.0820758	0.632304	0.311903
	3.08718	0.999242	-0.426547		0.0885376	0.63396	0.321949
	3.0934	0.999467	-0.423802		0.0954725	0.635331	0.332284
	3.0997	0.999914	-0.421047		0.102871	0.63642	0.342943
	3.10607	1.00057	-0.41828		0.110724	0.637227	0.353924
	3.11243	1.00142	-0.415478		0.119029	0.637761	0.36522
	3.11881	1.00245	-0.412676		0.127785	0.638005	0.376817
	3.12519	1.00366	-0.409856		0.136985	0.638002	0.388707
	3.13157	1.00506	-0.407024		0.146597	0.637734	0.400852
	3.1379	1.00659	-0.404159		0.156625	0.637222	0.413283
	3.14422	1.00828	-0.401254		0.167069	0.636432	0.426009
	3.15053	1.0101	-0.398322		0.177914	0.635358	0.439016
	3.15683	1.01206	-0.395364		0.189155	0.633995	0.452318
	3.1631	1.01412	-0.392388		0.200784	0.632337	0.465906
	3.16933	1.01627	-0.389417		0.212785	0.630396	0.479793
	3.17553	1.01853	-0.386432		0.225121	0.628139	0.493974
	3.1817	1.0209	-0.383435		0.2378	0.625575	0.508431
	3.18782	1.02337	-0.38044		0.250834	0.622736	0.523158
	3.19385	1.02593	-0.377446		0.264217	0.619616	0.538153
	3.19975	1.0286	-0.37446		0.277934	0.616208	0.553395
	3.20553	1.03134	-0.371478		0.291966	0.612555	0.568893
	3.2112	1.03419	-0.36853		0.306284	0.60865	0.584631
	3.21672	1.03712	-0.365581		0.320865	0.604479	0.600619
	3.2221	1.04012	-0.362653		0.3357	0.600025	0.616839
	3.22734	1.04318	-0.359766		0.350786	0.595276	0.63326
	3.23247	1.0463	-0.356919		0.366112	0.59023	0.649861
	3.23745	1.04947	-0.354092		0.381675	0.584888	0.666642
	3.2423	1.05268	-0.351259		0.39744	0.579281	0.6836
	3.247	1.05591	-0.348396		0.413379	0.573408	0.700723
	3.25153	1.05914	-0.34548		0.42946	0.567262	0.718005
	3.25588	1.06238	-0.342518		0.445687	0.560834	0.735393
	3.26005	1.06561	-0.339537		0.462031	0.55413	0.75286
	3.26403	1.06885	-0.336551		0.478472	0.547148	0.770418
	3.26783	1.0721	-0.333545		0.49498	0.539888	0.788044
	3.27144	1.07537	-0.330518		0.511539	0.532368	0.805728
	3.27483	1.07866	-0.327451		0.528137	0.524581	0.823436
	3.278	1.08197	-0.324343		0.544763	0.51656	0.841146
	3.28093	1.0853	-0.321201		0.561377	0.508293	0.858856
	3.28363	1.08864	-0.318044		0.577963	0.49978	0.876574
	3.28611	1.09197	-0.314873		0.594506	0.491012	0.894276
	3.28842	1.09532	-0.311659		0.610993	0.481977	0.911925
	3.29058	1.09866	-0.308396		0.627384	0.472662	0.929515
	3.29258	1.10197	-0.305072		0.643646	0.463099	0.947056
	3.29445	1.10526	-0.30172		0.65972	0.453262	0.964524
	3.29615	1.1085	-0.298341		0.675595	0.44318	0.981918
	3.29766	1.11169	-0.294923		0.69125	0.432855	0.999207
	3.29899	1.11482	-0.291442		0.706709	0.422299	1.01638
	3.30019	1.11792	-0.287894		0.721943	0.411501	1.03342
	3.30122	1.12096	-0.284263		0.736941	0.400496	1.05033
	3.30205	1.12396	-0.280544		0.751666	0.389286	1.06711
	3.30268	1.1269	-0.276755		0.766116	0.377888	1.08378
	3.30314	1.12975	-0.272879		0.78029	0.366302	1.10029
	3.30346	1.13249	-0.268917		0.794135	0.354514	1.11664
	3.30368	1.13514	-0.264879		0.807633	0.342571	1.1328
	3.30375	1.1377	-0.260755		0.820774	0.330445	1.1488
	3.30365	1.14019	-0.256529		0.833526	0.318153	1.16461
	3.30342	1.14261	-0.25218		0.845857	0.305676	1.18024
	3.30303	1.14494	-0.247695		0.857755	0.293001	1.19565
	3.30246	1.14719	-0.24307		0.869238	0.280151	1.21085
	3.30173	1.14934	-0.238314		0.88033	0.26714	1.22585
	3.30088	1.15138	-0.233426		0.89101	0.253986	1.24065
	3.29998	1.15328	-0.228378		0.90124	0.240758	1.25522
	3.29901	1.15501	-0.223174		0.911005	0.227487	1.26952
	3.29797	1.1566	-0.217781		0.92031	0.214189	1.28356
	3.29687	1.15803	-0.212217		0.929161	0.200869	1.29731
	3.29571	1.15932	-0.206471		0.937531	0.187518	1.31076
	3.29449	1.16045	-0.20054		0.945422	0.174141	1.32387
	3.29322	1.16146	-0.194425		0.952838	0.160739	1.33662
	3.29189	1.16229	-0.188108		0.95979	0.147304	1.34904
	3.29048	1.16298	-0.181574		0.966282	0.133871	1.36113
	3.28901	1.16352	-0.174836		0.972321	0.120501	1.37286
	3.28748	1.16393	-0.167908		0.97788	0.107235	1.38418
	3.28593	1.16419	-0.160791		0.982972	0.0940571	1.39513
	3.28434	1.16428	-0.153487		0.987645	0.0809927	1.40572
	3.28273	1.16421	-0.146007		0.991901	0.0680402	1.41596
	3.28107	1.16396	-0.138337		0.995701	0.055215	1.42584
	3.27937	1.16354	-0.130476		0.999051	0.0425171	1.43531
	3.27764	1.16294	-0.122431		1.00196	0.0299553	1.44433
	3.27591	1.16216	-0.114211		1.00447	0.017539	1.45291
	3.27424	1.16121	-0.105832		1.00654	0.00529093	1.46103
	3.27261	1.16008	-0.0972854		1.00817	-0.00672516	1.46871
	3.27102	1.15881	-0.0885715		1.00936	-0.0184915	1.47593
	3.26942	1.15741	-0.0796752		1.01012	-0.0299841	1.4827
	3.26779	1.15586	-0.0705824		1.01044	-0.0412083	1.48901
	3.26616	1.15418	-0.061257		1.01038	-0.0521517	1.49484
	3.26455	1.15239	-0.0517054		1.00995	-0.0628267	1.50019
	3.26296	1.15049	-0.0419289		1.00915	-0.0732005	1.50506
	3.26136	1.14849	-0.0319423		1.00797	-0.0832609	1.50945
	3.25979	1.14638	-0.0217601		1.00644	-0.0930001	1.51332
	3.25823	1.14419	-0.0113706		1.00458	-0.102392	1.51667
	3.25669	1.14193	-0.000756138		1.00241	-0.111432	1.51948
	3.25518	1.13958	0.0100642		0.999891	-0.120092	1.52172
	3.25373	1.13713	0.0210938		0.997025	-0.1284	1.52342
	3.25232	1.13459	0.0323505		0.9938	-0.13633	1.52459
	3.25098	1.13194	0.0438577		0.990235	-0.143892	1.5252
	3.24972	1.12924	0.0556136		0.986354	-0.151065	1.52525
	3.24853	1.1265	0.0676314		0.982153	-0.157845	1.52472
	3.24746	1.12373	0.0799187		0.977662	-0.164207	1.5236
	3.24646	1.1209	0.0924642		0.972859	-0.170117	1.52189
	3.24553	1.11802	0.105274		0.96773	-0.175588	1.51959
	3.24468	1.11508	0.118355		0.962295	-0.180612	1.51667
	3.24386	1.11208	0.131698		0.956602	-0.185208	1.51315
	3.24309	1.10908	0.145324		0.950658	-0.189368	1.50903
	3.24238	1.10607	0.159212		0.944459	-0.193107	1.50429
	3.24173	1.10303	0.173363		0.937993	-0.196405	1.49893
	3.24117	1.09999	0.187751		0.931266	-0.199258	1.49299
	3.24071	1.09698	0.202406		0.924346	-0.201665	1.48647
	3.24036	1.094	0.21732		0.91728	-0.203635	1.47938
	3.24011	1.09106	0.232495		0.910069	-0.205218	1.4717
	3.23994	1.08818	0.247918		0.902716	-0.206411	1.46342
	3.23987	1.08532	0.263566		0.895198	-0.207209	1.45452
	3.23991	1.08248	0.279444		0.887523	-0.207606	1.44501
	3.24009	1.07967	0.295551		0.879711	-0.207601	1.4349
	3.24037	1.07692	0.311894		0.871771	-0.207197	1.42424
	3.24072	1.07423	0.328476		0.86371	-0.206415	1.41303
	3.24109	1.07162	0.345282		0.855538	-0.205308	1.40129
	3.24149	1.06909	0.36228		0.847305	-0.203882	1.38904
	3.24193	1.06665	0.379468		0.839025	-0.202129	1.3763
	3.24243	1.06431	0.396833		0.830713	-0.200066	1.36305
	3.24294	1.06206	0.414384		0.822394	-0.1977	1.34931
	3.24345	1.05992	0.432077		0.814077	-0.195025	1.33507
	3.24397	1.0579	0.449868		0.805784	-0.192038	1.32038
	3.2445	1.05602	0.467735		0.797544	-0.188716	1.30529
	3.24509	1.05427	0.485691		0.789408	-0.185096	1.28981
	3.2457	1.05267	0.503724		0.781361	-0.181191	1.27396
	3.24632	1.05121	0.521863		0.773421	-0.177003	1.25774
	3.24693	1.04992	0.540084		0.765571	-0.172529	1.24118
	3.24752	1.04878	0.558382		0.757795	-0.1678	1.22431
	3.24808	1.04782	0.576746		0.750113	-0.162817	1.20715
	3.24859	1.047	0.595159		0.742531	-0.157586	1.18967
	3.24905	1.04635	0.613607		0.735067	-0.152136	1.17189
	3.24948	1.04586	0.632057		0.727742	-0.146481	1.15383
	3.24984	1.04551	0.650493		0.720576	-0.140642	1.13553
	3.25015	1.04529	0.668906		0.713555	-0.134662	1.11698
	3.25038	1.04515	0.687305		0.706639	-0.128535	1.09823
	3.25049	1.04508	0.705686		0.699854	-0.12227	1.07929
	3.25052	1.04508	0.724049		0.693229	-0.115871	1.06018
	3.25047	1.04513	0.742389		0.686775	-0.109344	1.04093
	3.25031	1.04527	0.760681		0.680516	-0.102728	1.02156
	3.25004	1.04549	0.778903		0.674493	-0.096024	1.00208
	3.24965	1.0458	0.797047		0.668693	-0.0892489	0.982548
	3.24914	1.0462	0.815087		0.663081	-0.0824249	0.962947
	3.24852	1.0467	0.833007		0.65762	-0.0755518	0.94331
	3.24776	1.0473	0.850814		0.652301	-0.0686262	0.923652
	3.24689	1.04795	0.868482		0.647143	-0.0616574	0.904004
	3.24593	1.04856	0.886021		0.642173	-0.0546658	0.884371
	3.24488	1.04911	0.903452		0.637396	-0.0476557	0.864783
	3.2437	1.04963	0.920736		0.632829	-0.0406556	0.845238
	3.24234	1.05013	0.937837		0.628471	-0.0336481	0.825749
	3.24079	1.05065	0.954728		0.624315	-0.0266506	0.806322
	3.23908	1.05121	0.971405		0.620352	-0.0196871	0.786979
	3.2372	1.05177	0.987849		0.616597	-0.0127866	0.767722
	3.23517	1.05234	1.00406		0.613044	-0.00595949	0.748566
	3.23299	1.0529	1.02		0.609676	0.00076862	0.729509
	3.23065	1.05345	1.03564		0.606507	0.00739612	0.710592
	3.22813	1.05397	1.05099		0.603545	0.0139195	0.69184
	3.2254	1.05446	1.06604		0.60077	0.0203495	0.67326
	3.22251	1.05494	1.08078		0.598188	0.026688	0.654823
	3.21946	1.05543	1.09516		0.595785	0.0329256	0.636549
	3.21626	1.05593	1.10916		0.593563	0.039058	0.618463
	3.21291	1.05643	1.12277		0.591496	0.0450614	0.60057
	3.2094	1.05694	1.13597		0.589543	0.0509419	0.58289
	3.20572	1.05746	1.14878		0.587721	0.0566927	0.565446
	3.20187	1.05794	1.16116		0.586027	0.0623127	0.548246
	3.19783	1.0584	1.17308		0.584482	0.0677847	0.531308
	3.19361	1.05884	1.18454		0.583063	0.0730941	0.514647
	3.18923	1.05929	1.19551		0.581767	0.0782357	0.498289
	3.18469	1.05969	1.20601		0.580554	0.0831848	0.482262
	3.17999	1.06007	1.21603		0.57941	0.087938	0.466571
	3.17511	1.06043	1.22559		0.578349	0.0924947	0.451257
	3.17005	1.06075	1.23462		0.577367	0.0968198	0.436331
	3.16482	1.06104	1.2431		0.576485	0.100924	0.42179
	3.15942	1.06131	1.25099		0.575694	0.104827	0.40763
	3.15385	1.06154	1.25831		0.57496	0.108553	0.393872
[truncated: 48,001 more rows]

## Sheet: panel_D
	freely_moving	anesthetized
	90.0304	73.6948
	95.5855	44.0134
	41.3676	32.8654

## Sheet: panel_E_vehicle
	-0.116386	-0.124525	-0.470519	-0.202507
	-0.121156	-0.128383	-0.35627	-0.18978
	-0.150317	-0.129401	-0.289916	-0.0897881
	-0.16886	-0.109415	-0.24111	0.0262523
	-0.176749	-0.0844209	-0.19519	0.127167
	-0.187388	-0.0614476	-0.186908	0.182726
	-0.192649	-0.034408	-0.199835	0.160011
	-0.18152	-0.0274833	-0.178713	0.0893428
	-0.170927	-0.0520864	-0.17312	0.0414903
	-0.16382	-0.0711955	-0.191584	-0.000611782
	-0.145507	-0.0656687	-0.169933	-0.0695295
	-0.122451	-0.0636346	-0.111879	-0.104357
	-0.119926	-0.0625171	-0.094614	-0.0687892
	-0.13498	-0.0470423	-0.122137	-0.0146333
	-0.157332	-0.0382635	-0.149198	0.00394727
	-0.19246	-0.0458517	-0.203348	-0.0240252
	-0.222088	-0.046562	-0.266537	-0.105573
	-0.197572	-0.0469898	-0.263121	-0.177448
	-0.133859	-0.0717192	-0.199744	-0.139882
	-0.0703888	-0.097062	-0.154075	-0.0216709
	-0.0221077	-0.0938876	-0.118201	0.0495906
	0.00407799	-0.0730977	-0.0462222	0.0381373
	-0.00728509	-0.0517222	0.0142243	0.017518
	-0.0367609	-0.0288892	0.0563944	0.0340608
	-0.056535	-0.019788	0.112409	0.104943
	-0.0813196	-0.0412149	0.163158	0.214831
	-0.13135	-0.0613373	0.154589	0.275993
	-0.175405	-0.0602942	0.127276	0.234966
	-0.187551	-0.0617436	0.108956	0.176173
	-0.173341	-0.0813543	0.033372	0.210789
	-0.129645	-0.0918796	-0.0753996	0.309043
	-0.0569864	-0.0836355	-0.11555	0.403799
	0.00482151	-0.0657342	-0.0662696	0.46227
	0.0211083	-0.0251931	-0.0050569	0.465082
	0.0111722	0.0214891	0.0659256	0.429451
	-0.00434305	0.0287135	0.127446	0.431976
	-0.0217822	-0.0112879	0.106329	0.481653
	-0.0241113	-0.046903	0.02616	0.481855
	-0.00132814	-0.0574782	-0.0217072	0.409137
	0.0178324	-0.0603932	-0.0336611	0.337021
	0.0180478	-0.0319029	-0.0661138	0.306129
	0.0202112	0.00193376	-0.0830098	0.285991
	0.0200234	0.0138	-0.0738845	0.262112
	0.00123065	-0.012619	-0.084662	0.22498
	-0.0172254	-0.0127126	-0.0929626	0.16834
	-0.0116803	-0.0167878	-0.0501289	0.103612
	0.00242159	-0.0425	-0.0041754	0.121924
	0.00818207	-0.0663116	-0.00762172	0.109209
	0.00593662	-0.0698531	0.0318342	-0.000888501
	-0.0152441	-0.0687809	0.13257	-0.119047
	-0.0491811	-0.0650581	0.201532	-0.150753
	-0.0652494	-0.0471098	0.197424	-0.129096
	-0.0497425	-0.0400443	0.163673	-0.113325
	-0.0312474	-0.0567574	0.10261	-0.131342
	-0.0229469	-0.0697896	0.0396001	-0.189368
	-0.010883	-0.0723457	0.0700411	-0.251372
	0.00213987	-0.0913886	0.159445	-0.221605
	0.00539952	-0.118591	0.201724	-0.0991873
	0.00839838	-0.113697	0.185826	0.0112752
	0.022315	-0.0787797	0.183565	0.0372065
	0.033319	-0.0387082	0.190056	-0.00900736
	0.0416785	-0.00837772	0.200172	-0.0981101
	0.0592671	-0.00733328	0.242371	-0.194819
	0.0700755	-0.0550793	0.258935	-0.241462
	0.0538057	-0.113186	0.186776	-0.249544
	0.0261951	-0.131416	0.0859694	-0.268568
	0.0118779	-0.123399	0.0398795	-0.277095
	0.00702752	-0.115647	-0.00875416	-0.215027
	0.00636552	-0.101308	-0.090632	-0.111427
	0.0105029	-0.0844779	-0.129103	-0.034653
	0.012625	-0.0825742	-0.0928661	0.00417255
	0.0196353	-0.07373	-0.0095283	-0.00918428
	0.0609137	-0.0480115	0.0980586	-0.0762235
	0.131419	-0.041019	0.190949	-0.137591
	0.17606	-0.0614021	0.182214	-0.160984
	0.18066	-0.0694249	0.115272	-0.209672
	0.174695	-0.0519292	0.0932605	-0.294512
	0.161936	-0.0326635	0.109066	-0.329946
	0.129866	-0.00795026	0.0977689	-0.296122
	0.105793	0.019096	0.0784708	-0.249743
	0.105104	0.0262333	0.106591	-0.23143
	0.102823	-0.000393184	0.168331	-0.242351
	0.0946166	-0.00119092	0.281344	-0.285313
	0.0946328	-0.00142699	0.425913	-0.297164
	0.0930246	-0.0124251	0.489272	-0.215921
	0.0805248	-0.00187965	0.383135	-0.0937355
	0.0780694	0.04057	0.208623	-0.05282
	0.0811459	0.0742622	0.102727	-0.0066296
	0.0670518	0.0763338	0.0662373	0.0601063
	0.0491079	0.0534042	0.0628205	0.105819
	0.0483432	0.0387502	0.051839	0.103196
	0.0495629	0.00275516	0.00192513	0.0624022
	0.0365475	-0.024699	-0.0523912	-0.0133628
	0.0257213	-0.0299319	-0.00104273	-0.0816712
	0.0149953	-0.0262317	0.135167	-0.0578163
	-0.00830784	-0.0121152	0.196253	0.0458424
	-0.0230805	0.0223333	0.14385	0.0970409
	-0.0155924	0.052998	0.066059	0.0505579
	-0.0149063	0.060105	0.0201838	-0.0201604
	-0.0337034	0.0628592	-0.0147902	-0.0506926
	-0.0409045	0.0627503	-0.0242694	-0.0381097
	-0.0295795	0.041071	-0.0430232	-0.00757272
	-0.00511273	0.00505128	-0.122436	-0.0137852
	0.0425143	-0.00805022	-0.188656	-0.100784
	0.102273	0.00398382	-0.144466	-0.195576
	0.133098	0.0282885	-0.0519233	-0.212516
	0.126192	0.0678196	-0.0323449	-0.178973
	0.0976338	0.104675	-0.0547371	-0.171088
	0.0393617	0.110657	-0.0825906	-0.170851
	-0.0371188	0.0945873	-0.0995438	-0.142334
	-0.0856838	0.0922317	-0.0620205	-0.0920713
	-0.0886962	0.0991195	0.00562709	-0.00505457
	-0.0838539	0.102702	-0.0360161	0.110807
	-0.0928388	0.119319	-0.204717	0.171369
	-0.100984	0.146495	-0.320543	0.131462
	-0.101226	0.165539	-0.305107	0.0810056
	-0.0920279	0.186555	-0.236353	0.0809858
	-0.0667105	0.214497	-0.200199	0.091585
	-0.0330819	0.208377	-0.231187	0.0783977
	-0.0160431	0.154315	-0.326627	0.0568681
	-0.0126006	0.0991052	-0.378086	0.0415223
	-0.00180467	0.0671524	-0.273459	0.0470111
	0.0126728	0.0362784	-0.134344	0.0944701
	0.0242206	0.0115902	-0.131972	0.116554
	0.0436225	0.0188711	-0.224824	0.0401577
	0.0681133	0.0459148	-0.237874	-0.0757802
	0.0660292	0.0860751	-0.12506	-0.129907
	0.0434876	0.139215	0.0651837	-0.127569
	0.035157	0.166133	0.238058	-0.115825
	0.0505962	0.130634	0.257986	-0.0946554
	0.074981	0.0790423	0.148028	-0.0943934
	0.101274	0.0432531	0.0926347	-0.134457
	0.116484	0.0446364	0.166307	-0.168525
	0.103803	0.0591416	0.212768	-0.161094
	0.0905341	0.0860146	0.144176	-0.152333
	0.109556	0.105276	0.0228459	-0.147857
	0.144649	0.0978386	-0.0595106	-0.106115
	0.16585	0.0833734	-0.0424467	-0.045238
	0.176433	0.0686472	0.068564	0.00370351
	0.172619	0.0388667	0.167544	0.0529926
	0.138648	0.011114	0.149128	0.105547
	0.0982679	0.0175311	0.104671	0.124687
	0.0796478	0.0522304	0.154333	0.136082
	0.0779805	0.085366	0.242254	0.179781
	0.0695119	0.116079	0.22987	0.195023
	0.0688494	0.132711	0.0973904	0.132748
	0.0650167	0.113557	-0.0706059	0.0547996
	0.0395438	0.0809575	-0.187808	0.0288809
	0.0194067	0.0718178	-0.164034	0.0341456
	0.0271085	0.0728259	-0.0546733	0.0600699
	0.0409191	0.0654392	-0.0276931	0.0944629
	0.0440603	0.0733524	-0.150265	0.0771778
	0.0601029	0.0958001	-0.275819	-0.00207052
	0.0887122	0.110095	-0.278714	-0.0737651
	0.113993	0.116779	-0.211594	-0.100471
	0.142192	0.125097	-0.161293	-0.120982
	0.170733	0.116022	-0.181846	-0.13286
	0.173134	0.0898261	-0.259714	-0.120654
	0.151895	0.0809056	-0.30765	-0.103615
	0.139251	0.0955094	-0.207425	-0.0945872
	0.137213	0.107267	-0.035816	-0.0670326
	0.142607	0.0931748	0.0165621	-0.0331836
	0.169146	0.0916289	-0.0700219	-0.0531802
	0.207255	0.0764971	-0.169924	-0.115982
	0.220018	0.057867	-0.219845	-0.175709
	0.201353	0.0695918	-0.23489	-0.228938
	0.173809	0.102506	-0.226419	-0.281296
	0.143522	0.120169	-0.280458	-0.291474
	0.124852	0.124942	-0.41776	-0.25854
	0.13897	0.140618	-0.481796	-0.231166
	0.170972	0.148607	-0.388957	-0.202587
	0.177155	0.134157	-0.280164	-0.166038
	0.153655	0.11046	-0.314805	-0.170359
	0.130214	0.06635	-0.455263	-0.226133
	0.111535	0.0128668	-0.608621	-0.250803
	0.0940181	-0.0238281	-0.673791	-0.216226
	0.0873188	-0.0274557	-0.605958	-0.170355
	0.0923037	-0.0304512	-0.512447	-0.12428
	0.0874702	-0.0436896	-0.567149	-0.0788472
	0.0783934	-0.0400401	-0.738792	-0.0658679
	0.0835909	-0.0141893	-0.807449	-0.0908921
	0.0995668	0.0116505	-0.7228	-0.108141
	0.125354	0.0365138	-0.60469	-0.135576
	0.167717	0.0575633	-0.558714	-0.206679
	0.200292	0.0382729	-0.601721	-0.270498
	0.174712	-0.0151865	-0.692198	-0.282803
	0.108255	-0.0567798	-0.68703	-0.287069
	0.0552776	-0.0768482	-0.532261	-0.30119
	0.0304948	-0.090718	-0.4059	-0.275341
	0.0287188	-0.0821057	-0.435268	-0.228895
	0.0572542	-0.0510976	-0.526591	-0.200053
	0.100022	-0.0301182	-0.547384	-0.163096
	0.11375	-0.0195852	-0.506721	-0.110929
	0.0943566	-0.00618775	-0.44615	-0.087572
	0.0653577	-0.0127762	-0.414698	-0.0787261
	0.0343265	-0.0526762	-0.45984	-0.0355461
	0.00932064	-0.0803092	-0.506885	0.010868
	0.0113111	-0.0709853	-0.437784	0.0356787
	0.0356962	-0.0514984	-0.286112	0.0674976
	0.0626031	-0.0377325	-0.237286	0.109206
	0.105465	-0.0303567	-0.323366	0.118169
	0.165041	-0.0442852	-0.438092	0.112416
	0.211443	-0.0817179	-0.501492	0.130302
	0.23433	-0.113919	-0.485303	0.138508
	0.256884	-0.128961	-0.409718	0.12442
	0.270096	-0.157281	-0.375787	0.131982
	0.251858	-0.179946	-0.460268	0.167537
	0.218219	-0.178752	-0.531893	0.168806
	0.183319	-0.177474	-0.483428	0.144692
	0.143819	-0.188436	-0.39001	0.144167
	0.115264	-0.185522	-0.371537	0.159678
	0.117976	-0.169785	-0.422413	0.183512
	0.124528	-0.155868	-0.48303	0.223665
	0.112121	-0.139564	-0.495638	0.240106
	0.107583	-0.120067	-0.406479	0.173506
	0.124137	-0.125459	-0.300773	0.0709231
	0.140388	-0.158698	-0.334378	0.00872409
	0.148308	-0.179493	-0.498249	-0.00297086
	0.157118	-0.180338	-0.584183	0.0238905
	0.158518	-0.181242	-0.507925	0.0977917
	0.157148	-0.188798	-0.403913	0.184904
	0.172872	-0.201134	-0.381378	0.230187
	0.193542	-0.226071	-0.47249	0.257607
	0.191316	-0.246808	-0.627126	0.291326
	0.172971	-0.230402	-0.711355	0.287891
	0.163893	-0.193392	-0.620801	0.232691
	0.155244	-0.176804	-0.501977	0.194991
	0.137106	-0.177904	-0.521434	0.207736
	0.115477	-0.174501	-0.604597	0.239173
	0.0922937	-0.178825	-0.611274	0.289998
	0.0626776	-0.189661	-0.52324	0.338827
	0.0448984	-0.190732	-0.4098	0.33099
	0.0535753	-0.196475	-0.346235	0.27279
	0.0680645	-0.216478	-0.428835	0.241391
	0.0768375	-0.219039	-0.594395	0.241808
	0.0933871	-0.188074	-0.656295	0.221041
	0.11385	-0.160835	-0.553677	0.186589
	0.140536	-0.154664	-0.437433	0.154962
	0.156961	-0.151023	-0.429541	0.108544
	0.17219	-0.150449	-0.481918	0.0517316
	0.166069	-0.161818	-0.532576	0.0272602
	0.134834	-0.163369	-0.527429	0.0218283
	0.111551	-0.147174	-0.451523	0.0265742
	0.119314	-0.145714	-0.403012	0.0914308
	0.147298	-0.154965	-0.487652	0.207893
	0.196278	-0.158148	-0.609654	0.279875
	0.258734	-0.139377	-0.609725	0.268452
	0.29016	-0.140473	-0.549637	0.226391
	0.270331	-0.138894	-0.562886	0.16888
	0.222206	-0.128268	-0.678907	0.121904
	0.162849	-0.132244	-0.830083	0.14491
	0.0979629	-0.140121	-0.924076	0.224324
	0.070723	-0.136391	-0.851133	0.283419
	0.0987002	-0.136067	-0.648644	0.299643
	0.139197	-0.144882	-0.517011	0.281339
	0.156986	-0.12879	-0.534872	0.199393
	0.157909	-0.0924943	-0.580365	0.0875171
	0.141724	-0.0773443	-0.534986	0.0277277
	0.112077	-0.0893564	-0.447439	0.0179452
	0.103019	-0.112549	-0.377927	-0.0491952
	0.114392	-0.151028	-0.380667	-0.0787901
	0.115075	-0.199488	-0.478582	-0.0845311
	0.116227	-0.218966	-0.569255	-0.0986913
	0.151494	-0.206353	-0.526801	-0.123152
	0.198284	-0.188139	-0.420319	-0.119727
	0.217355	-0.164657	-0.435177	-0.0862704
	0.219517	-0.133562	-0.567562	-0.0643125
	0.215912	-0.114485	-0.697919	-0.0505743
	0.199668	-0.116575	-0.761527	-0.0388421
	0.179829	-0.120108	-0.746091	-0.0549354
	0.171174	-0.124322	-0.694325	-0.0699636
	0.161702	-0.128845	-0.705475	-0.0304943
	0.150226	-0.10853	-0.80265	0.0361755
	0.158609	-0.0620848	-0.816212	0.0513202
	0.174309	-0.0275837	-0.66867	0.019595
	0.16794	-0.0207514	-0.496033	-0.0268318
	0.142348	-0.0165468	-0.451591	-0.0935305
	0.115123	-0.0249134	-0.514378	-0.159137
	0.0782746	-0.0667991	-0.602036	-0.182267
	0.0470096	-0.122332	-0.640318	-0.179093
	0.0564069	-0.163903	-0.560213	-0.20604
	0.100953	-0.195028	-0.450178	-0.23906
	0.13963	-0.21829	-0.459509	-0.242049
	0.16192	-0.219582	-0.557432	-0.235655
	0.187603	-0.217968	-0.564559	-0.26618
	0.213069	-0.233877	-0.471559	-0.248366
	0.226842	-0.252741	-0.393077	-0.250981
	0.227399	-0.266491	-0.384193	-0.288125
	0.211162	-0.274012	-0.466547	-0.287842
	0.182689	-0.279948	-0.608482	-0.231977
	0.16728	-0.263656	-0.684608	-0.191242
	0.171928	-0.254925	-0.629363	-0.198002
	0.161688	-0.283141	-0.584732	-0.21877
	0.126655	-0.32355	-0.662852	-0.260458
	0.0970499	-0.34635	-0.78637	-0.331953
	0.0874413	-0.354201	-0.855858	-0.375291
	0.082148	-0.339055	-0.858184	-0.36341
	0.0809947	-0.297569	-0.818015	-0.319005
	0.0927313	-0.268906	-0.765242	-0.243996
	0.101762	-0.27744	-0.790543	-0.143933
	0.106032	-0.293403	-0.863699	-0.109756
	0.119524	-0.296712	-0.860377	-0.195269
	0.139001	-0.306275	-0.776618	-0.320481
	0.147801	-0.312785	-0.735972	-0.409777
	0.162333	-0.301751	-0.769218	-0.450733
	0.190708	-0.296692	-0.801151	-0.431048
	0.206138	-0.310179	-0.793257	-0.352967
	0.207256	-0.316916	-0.690794	-0.296544
	0.216027	-0.309867	-0.509977	-0.284609
	0.215666	-0.302687	-0.391412	-0.255244
	0.174217	-0.291015	-0.456444	-0.200482
	0.113247	-0.255359	-0.604239	-0.157363
	0.0395114	-0.240612	-0.682865	-0.116359
	0.0287627	-0.260538	-0.692746	-0.0662441
	0.0430706	-0.280883	-0.685468	-0.0554542
	0.0926134	-0.289039	-0.694284	-0.0762993
	0.14906	-0.291408	-0.738555	-0.0792233
	0.191451	-0.274573	-0.804695	-0.0783925
	0.240728	-0.244202	-0.799248	-0.117506
	0.295368	-0.23169	-0.712675	-0.176414
	0.324482	-0.25158	-0.669279	-0.170585
	0.326374	-0.269822	-0.706853	-0.153457
	0.324256	-0.29793	-0.744791	-0.132544
	0.318667	-0.343054	-0.739408	-0.0972267
	0.299912	-0.371307	-0.738657	-0.0768129
	0.280908	-0.362775	-0.740176	-0.111681
	0.252368	-0.336284	-0.772379	-0.168981
	0.202225	-0.305835	-0.87965	-0.201972
	0.159441	-0.270182	-0.997155	-0.218706
	0.159393	-0.269825	-1.02087	-0.208501
	0.182609	-0.302659	-0.980468	-0.158787
	0.203557	-0.349092	-0.981735	-0.106953
	0.219221	-0.383043	-0.998742	-0.0963257
	0.210939	-0.402173	-0.991424	-0.0860494
	0.16629	-0.402959	-0.959414	-0.051956
	0.115901	-0.37621	-0.891341	-0.0431758
	0.0878723	-0.344049	-0.788754	-0.0747117
	0.0679768	-0.320885	-0.755134	-0.109271
	0.0502517	-0.29714	-0.844854	-0.134146
	0.0482771	-0.278312	-0.920463	-0.16556
	0.0559594	-0.294586	-0.89727	-0.170588
	0.062589	-0.344903	-0.841196	-0.148356
	0.0771642	-0.390843	-0.801707	-0.148784
	0.104585	-0.419551	-0.756855	-0.159549
	0.119788	-0.438247	-0.725731	-0.128526
	0.113895	-0.430092	-0.707025	-0.0830998
	0.0988268	-0.396631	-0.643613	-0.0795524
	0.0694857	-0.370801	-0.60718	-0.0796845
	0.0252252	-0.358098	-0.689223	-0.0522858
	-0.00469914	-0.33982	-0.827272	-0.0262318
	-0.0060791	-0.330384	-0.886551	-0.0122808
	-0.0106973	-0.340801	-0.879828	-0.0135088
	-0.0260972	-0.351607	-0.849618	-0.0727507
	-0.0375152	-0.358088	-0.799098	-0.176382
	-0.0478566	-0.378321	-0.789384	-0.210699
	-0.0677181	-0.391899	-0.852228	-0.148537
	-0.0822637	-0.374257	-0.899064	-0.0676385
	-0.0800392	-0.352264	-0.847912	-0.0120959
	-0.066723	-0.34824	-0.782432	0.028198
	-0.0347218	-0.354663	-0.758896	0.039106
	0.0135077	-0.345986	-0.747226	0.0457048
	0.0458973	-0.356511	-0.737405	0.109477
	0.0419302	-0.373796	-0.73818	0.18508
	0.0238894	-0.378638	-0.714391	0.183953
	0.0106384	-0.385424	-0.674918	0.114051
	-0.00759195	-0.394352	-0.712865	0.0444731
	-0.0170354	-0.385729	-0.794716	-0.00580972
	0.00218515	-0.377414	-0.803563	-0.00967932
	0.0276414	-0.39953	-0.731179	0.0564631
	0.0260306	-0.4254	-0.663379	0.133444
	0.00189572	-0.426553	-0.636339	0.160701
	-0.0379469	-0.413722	-0.664822	0.164307
	-0.0861691	-0.404307	-0.784621	0.180361
	-0.104725	-0.381038	-0.910194	0.175505
	-0.0809641	-0.38071	-0.941349	0.14921
	-0.057583	-0.41874	-0.896117	0.137464
	-0.0641212	-0.453584	-0.863966	0.140326
	-0.0694007	-0.459866	-0.839491	0.151308
	-0.0545186	-0.452737	-0.807623	0.193542
	-0.0328394	-0.444094	-0.804525	0.257226
	-0.0168031	-0.42614	-0.817338	0.278704
	-0.0103812	-0.409437	-0.840188	0.272509
	-0.0221895	-0.4031	-0.920094	0.285992
	-0.0434675	-0.390724	-1.06424	0.301259
	-0.0491928	-0.385263	-1.13942	0.266769
	-0.0499559	-0.386951	-1.09958	0.198863
	-0.0657901	-0.39383	-1.04083	0.135723
	-0.0757968	-0.374521	-1.02002	0.0792936
	-0.0598505	-0.346028	-1.01873	0.0559781
	-0.044552	-0.334717	-1.02436	0.0796906
	-0.052268	-0.33418	-1.0236	0.0976882
	-0.0747648	-0.341622	-0.956359	0.0583211
	-0.117141	-0.360773	-0.873435	0.00581605
	-0.17469	-0.373726	-0.87616	-0.00992539
	-0.214989	-0.360526	-0.914376	-0.00365544
	-0.220083	-0.34828	-0.866153	0.0217434
	-0.221176	-0.364258	-0.738339	0.0730982
	-0.230281	-0.392047	-0.624018	0.115318
	-0.234888	-0.411372	-0.539839	0.126244
	-0.227776	-0.42159	-0.526186	0.16153
	-0.205034	-0.419271	-0.582466	0.223066
	-0.16508	-0.39882	-0.615008	0.230819
	-0.124055	-0.383552	-0.569368	0.177698
	-0.119687	-0.386369	-0.559009	0.0864965
	-0.146038	-0.399213	-0.657806	0.0606365
	-0.157937	-0.4129	-0.763966	0.0527947
	-0.141232	-0.456877	-0.81256	0.0674229
	-0.113735	-0.492142	-0.808768	0.0587478
	-0.0796944	-0.474843	-0.753964	-0.0112415
	-0.0491651	-0.425727	-0.659345	-0.0662849
	-0.0449236	-0.380148	-0.607961	-0.0199031
	-0.0534555	-0.344445	-0.593135	0.075137
	-0.0574985	-0.331085	-0.524925	0.117328
	-0.0804677	-0.359547	-0.426374	0.0916623
	-0.127828	-0.403175	-0.384194	0.00840962
	-0.156835	-0.422987	-0.395756	-0.0971132
	-0.141671	-0.433186	-0.418022	-0.150456
	-0.111563	-0.433827	-0.458109	-0.140596
	-0.09041	-0.412559	-0.4631	-0.148467
	-0.0895526	-0.391129	-0.39195	-0.184758
	-0.118859	-0.406547	-0.35476	-0.174742
	-0.15752	-0.436141	-0.440914	-0.132078
	-0.158498	-0.455431	-0.557028	-0.124068
	-0.120385	-0.468967	-0.556719	-0.153292
	-0.0961864	-0.466082	-0.456079	-0.177429
	-0.105712	-0.431217	-0.313583	-0.17615
	-0.138174	-0.401722	-0.194803	-0.116219
	-0.186518	-0.380691	-0.173816	0.00257341
	-0.23218	-0.365926	-0.252595	0.0843038
	-0.241136	-0.35143	-0.310243	0.0761955
	-0.228766	-0.351117	-0.274361	0.0507712
	-0.229352	-0.354049	-0.229621	0.0866108
	-0.229516	-0.344539	-0.210613	0.151871
	-0.210414	-0.339672	-0.203854	0.206279
	-0.191682	-0.348442	-0.215397	0.224707
	-0.196164	-0.342412	-0.229594	0.178147
	-0.220732	-0.321057	-0.182239	0.0970103
	-0.262128	-0.324651	-0.128299	0.0610236
	-0.309477	-0.341713	-0.187941	0.0788888
	-0.330685	-0.376269	-0.306243	0.0671829
	-0.317929	-0.420819	-0.362024	0.00756833
	-0.296007	-0.460147	-0.34909	-0.0539534
	-0.273342	-0.461975	-0.33517	-0.0923311
	-0.228736	-0.439729	-0.317687	-0.0942607
	-0.177352	-0.396046	-0.293553	-0.0429762
	-0.148128	-0.365217	-0.273053	0.0253957
	-0.13238	-0.347981	-0.195734	0.0398752
	-0.116911	-0.360431	-0.0626179	0.0298137
	-0.113939	-0.402116	0.0159149	0.0628244
	-0.119032	-0.438041	-0.0350981	0.124158
	-0.108605	-0.453692	-0.108074	0.154619
	-0.102386	-0.454421	-0.128847	0.155631
	-0.107628	-0.439302	-0.110141	0.146895
	-0.107845	-0.407069	-0.0491774	0.130103
	-0.10196	-0.387987	0.0179352	0.146135
	-0.110668	-0.402784	0.00146827	0.205264
	-0.129418	-0.431434	-0.0809274	0.240936
	-0.139588	-0.456034	-0.0837956	0.203811
	-0.144359	-0.474029	-0.0186344	0.147366
	-0.148248	-0.471824	-0.00143214	0.103236
	-0.14459	-0.440237	-0.0521733	0.0512455
	-0.143849	-0.418496	-0.111634	0.0212751
	-0.176322	-0.418659	-0.155022	0.054336
	-0.233656	-0.410133	-0.153029	0.126247
	-0.270104	-0.389363	-0.0914027	0.198533
	-0.273252	-0.380205	-0.0768442	0.273619
	-0.253856	-0.37962	-0.172604	0.305102
	-0.220429	-0.37806	-0.278177	0.247967
	-0.198643	-0.388773	-0.282018	0.170798
	-0.222317	-0.401319	-0.239516	0.160391
	-0.266165	-0.391127	-0.236281	0.211715
	-0.292577	-0.37653	-0.257076	0.291907
	-0.309437	-0.386581	-0.285141	0.386899
	-0.325986	-0.403193	-0.266655	0.418195
	-0.329387	-0.409842	-0.148811	0.343096
	-0.314956	-0.427134	-5.27547e-05	0.246675
	-0.299763	-0.453264	0.000412296	0.212566
	-0.281488	-0.465946	-0.148594	0.220792
	-0.26379	-0.46433	-0.291568	0.237783
	-0.271566	-0.457112	-0.350745	0.259926
	-0.306804	-0.433968	-0.337319	0.251279
	-0.326034	-0.411316	-0.300698	0.221239
	-0.307414	-0.426134	-0.310238	0.22318
	-0.273924	-0.457153	-0.410976	0.253179
	-0.232162	-0.457957	-0.485665	0.250457
	-0.187242	-0.435949	-0.430903	0.229442
	-0.173828	-0.407864	-0.321859	0.239884
	-0.199265	-0.387765	-0.27244	0.254024
	-0.228531	-0.382393	-0.261205	0.238626
	-0.252425	-0.400779	-0.224588	0.214224
	-0.282132	-0.41651	-0.182127	0.189707
	-0.296949	-0.408245	-0.126601	0.138545
	-0.2976	-0.395235	-0.0885083	0.0877469
	-0.311117	-0.397464	-0.160966	0.0664143
	-0.333672	-0.399867	-0.321541	0.0340724
	-0.338012	-0.397847	-0.398082	-0.0191324
	-0.336164	-0.400279	-0.314771	-0.0406111
	-0.349972	-0.400683	-0.17917	-0.0117139
	-0.367712	-0.395673	-0.065224	0.0125551
	-0.376857	-0.403329	-0.00927228	0.0194201
	-0.380502	-0.415037	-0.0233012	0.0165669
	-0.374075	-0.392394	-0.0718778	-0.0111446
	-0.347993	-0.347287	-0.0933402	-0.041826
	-0.330786	-0.328265	-0.150225	-0.0129239
	-0.342835	-0.350833	-0.326761	0.0799293
	-0.360639	-0.394031	-0.513013	0.165032
	-0.372879	-0.445823	-0.553307	0.225961
	-0.395784	-0.483207	-0.451474	0.268605
	-0.429345	-0.473509	-0.317069	0.264951
	-0.449981	-0.435957	-0.203267	0.21575
	-0.471345	-0.413417	-0.176671	0.183521
	-0.499455	-0.420767	-0.23889	0.182576
	-0.515792	-0.421927	-0.247337	0.157518
	-0.52154	-0.420181	-0.142171	0.106712
	-0.528811	-0.42009	-0.0516495	0.0575121
	-0.531611	-0.421634	-0.0697764	0.0179835
	-0.529736	-0.44264	-0.13965	0.0214529
	-0.548634	-0.482626	-0.221599	0.102202
	-0.580763	-0.493764	-0.26689	0.18649
	-0.584362	-0.446148	-0.209387	0.18599
	-0.535412	-0.38683	-0.116226	0.153327
	-0.462618	-0.369379	-0.136482	0.163742
	-0.40306	-0.39641	-0.277524	0.20015
	-0.376659	-0.446395	-0.386243	0.21936
	-0.398845	-0.488329	-0.420501	0.221137
	-0.451251	-0.483173	-0.4153	0.182818
	-0.492123	-0.441463	-0.387537	0.106637
	-0.505264	-0.424541	-0.348966	0.0570249
	-0.508517	-0.436938	-0.324705	0.0461385
	-0.495036	-0.437061	-0.258366	0.0200527
	-0.465461	-0.423504	-0.0980985	-0.0124271
	-0.451822	-0.415196	0.0359765	0.0203614
	-0.464132	-0.402698	0.0573377	0.0901063
	-0.485058	-0.386259	0.0283996	0.122432
	-0.513532	-0.390523	0.0217788	0.100488
	-0.553094	-0.405476	0.0205674	0.0257476
	-0.578692	-0.408741	0.0447755	-0.0911383
	-0.57375	-0.413115	0.0953311	-0.170662
	-0.560435	-0.435822	0.104976	-0.151043
	-0.555895	-0.460275	0.0905673	-0.0990269
	-0.550144	-0.48017	0.118696	-0.0799429
	-0.541208	-0.504174	0.16535	-0.0774145
	-0.551971	-0.513558	0.131495	-0.0767675
	-0.577911	-0.502951	0.0433076	-0.0887121
	-0.611252	-0.4993	0.00784959	-0.0884905
	-0.655367	-0.507425	0.0614088	-0.0705473
	-0.686559	-0.488701	0.192008	-0.0915171
	-0.666224	-0.442137	0.349458	-0.137809
	-0.611958	-0.403461	0.422538	-0.135844
	-0.563606	-0.383363	0.312064	-0.0769195
	-0.512301	-0.383671	0.144852	-0.0398033
	-0.455085	-0.409658	0.0840225	-0.0597168
	-0.414776	-0.450514	0.124167	-0.125188
	-0.397661	-0.475179	0.182464	-0.234174
	-0.396162	-0.490069	0.231662	-0.345713
	-0.424498	-0.509973	0.260101	-0.408049
	-0.475078	-0.514919	0.276088	-0.430762
	-0.506274	-0.490929	0.359551	-0.44913
	-0.507426	-0.466001	0.471673	-0.416267
	-0.510479	-0.463901	0.471398	-0.307979
	-0.531445	-0.466396	0.336723	-0.202397
	-0.557401	-0.468296	0.221021	-0.163548
	-0.583694	-0.473737	0.211923	-0.179867
	-0.599813	-0.474021	0.243614	-0.227884
	-0.582293	-0.468676	0.258559	-0.291647
	-0.552077	-0.476417	0.220179	-0.311499
	-0.549995	-0.490393	0.125694	-0.277361
	-0.56832	-0.484273	0.061115	-0.260588
	-0.571081	-0.479602	0.131613	-0.287077
	-0.564334	-0.506504	0.239683	-0.295148
	-0.549459	-0.550065	0.225439	-0.254135
	-0.519112	-0.570947	0.142015	-0.211689
	-0.496756	-0.58461	0.0937447	-0.185005
	-0.503858	-0.592956	0.0924239	-0.183123
	-0.520789	-0.588215	0.11546	-0.208661
	-0.52346	-0.58545	0.145865	-0.202944
	-0.51604	-0.593749	0.091979	-0.106911
	-0.498957	-0.591313	-0.021477	0.00814952
	-0.472509	-0.563909	-0.0136624	0.0389353
	-0.454081	-0.532873	0.176286	0.0102357
	-0.466753	-0.501848	0.404041	-0.0238887
	-0.500245	-0.452108	0.527715	-0.0566812
	-0.535213	-0.404325	0.545589	-0.0816316
	-0.579817	-0.384321	0.484249	-0.0840854
	-0.623563	-0.377147	0.441643	-0.102743
	-0.631788	-0.367405	0.513577	-0.154609
	-0.6078	-0.376104	0.620786	-0.181105
	-0.586225	-0.396541	0.593812	-0.169259
	-0.574453	-0.410023	0.463537	-0.170383
	-0.569759	-0.427708	0.406589	-0.197876
	-0.577977	-0.453519	0.448891	-0.223227
	-0.569159	-0.464322	0.53391	-0.255884
	-0.52528	-0.465715	0.611443	-0.276785
	-0.479962	-0.486709	0.61838	-0.240098
	-0.468593	-0.515078	0.552642	-0.188873
	-0.466529	-0.545673	0.55166	-0.207852
	-0.443193	-0.542947	0.675476	-0.270621
	-0.405611	-0.536297	0.773098	-0.290519
	-0.376662	-0.515692	0.763812	-0.281123
	-0.372765	-0.489771	0.707764	-0.273025
	-0.404944	-0.48148	0.685605	-0.258037
	-0.465203	-0.476988	0.713545	-0.23813
	-0.506302	-0.462683	0.813024	-0.218947
	-0.510971	-0.457576	0.92314	-0.171304
	-0.511525	-0.476031	0.92517	-0.100885
	-0.514771	-0.501643	0.852607	-0.0805264
	-0.492553	-0.536885	0.845049	-0.103402
	-0.454288	-0.575739	0.923936	-0.0915002
	-0.426794	-0.603083	0.962766	-0.0287234
	-0.408871	-0.604078	0.914599	0.0250475
	-0.41111	-0.59432	0.787693	0.0423441
	-0.443264	-0.569695	0.612648	0.0289068
	-0.471462	-0.529274	0.498619	-0.0122178
	-0.468234	-0.473276	0.511126	-0.0218641
	-0.4554	-0.440133	0.553939	0.0411286
	-0.453307	-0.436216	0.519247	0.109712
	-0.447568	-0.453497	0.481424	0.0886001
	-0.439451	-0.491157	0.512998	0.00846542
	-0.434319	-0.534958	0.575055	-0.0515213
	-0.423062	-0.55479	0.625236	-0.0800079
	-0.394606	-0.557777	0.656682	-0.077581
	-0.369436	-0.560679	0.64158	-0.0541903
	-0.354831	-0.566587	0.57918	-0.0488574
	-0.331016	-0.542457	0.579554	-0.0733447
	-0.306076	-0.53358	0.640397	-0.0517276
	-0.307003	-0.555806	0.635151	0.029674
	-0.332526	-0.549379	0.532367	0.0783143
	-0.370926	-0.538593	0.450551	0.0510876
	-0.428914	-0.546617	0.440215	0.00385919
	-0.477253	-0.558535	0.486868	-0.0232756
	-0.47538	-0.556321	0.594673	-0.0400057
	-0.441952	-0.548246	0.668909	-0.0406424
	-0.418312	-0.533562	0.616815	-0.0556801
	-0.411057	-0.50168	0.521314	-0.125938
	-0.412803	-0.477331	0.524778	-0.200761
	-0.427061	-0.482311	0.580526	-0.210034
	-0.447153	-0.495618	0.595251	-0.192778
	-0.460172	-0.505664	0.575549	-0.209017
	-0.465121	-0.489237	0.534195	-0.214502
	-0.46443	-0.460704	0.493754	-0.175991
	-0.450802	-0.427617	0.515853	-0.109532
	-0.421847	-0.424917	0.606753	-0.0126945
	-0.411157	-0.454675	0.644364	0.0963629
	-0.424834	-0.476724	0.614975	0.12725
	-0.432648	-0.479895	0.65001	0.0517732
	-0.423204	-0.488173	0.776628	-0.0367178
	-0.415852	-0.494704	0.887297	-0.0816483
	-0.408471	-0.484719	0.92985	-0.0934375
	-0.40336	-0.477378	0.934152	-0.0819676
	-0.417639	-0.47537	0.89079	-0.0600535
	-0.427635	-0.453896	0.8688	-0.0823993
	-0.405655	-0.417799	0.938877	-0.139293
	-0.379952	-0.395104	1.03202	-0.158923
	-0.392987	-0.379442	1.04949	-0.135522
	-0.437599	-0.361973	1.04501	-0.0985184
	-0.493903	-0.354711	1.09511	-0.0273963
	-0.549717	-0.351731	1.15976	0.0821333
	-0.576158	-0.323769	1.22375	0.154513
	-0.561524	-0.276609	1.27357	0.17583
	-0.539104	-0.246717	1.25752	0.203606
	-0.538845	-0.232753	1.17372	0.248503
	-0.541218	-0.227086	1.14355	0.28733
	-0.53173	-0.237049	1.19961	0.316065
	-0.529875	-0.251345	1.1987	0.309415
	-0.53456	-0.248282	1.0694	0.213817
	-0.534535	-0.230287	0.884097	0.075113
	-0.540627	-0.233798	0.730865	-0.0153016
	-0.55106	-0.246796	0.652896	-0.0444467
	-0.532282	-0.266549	0.706272	-0.0531097
	-0.502701	-0.302837	0.829497	-0.049599
	-0.498302	-0.33707	0.878421	-0.0397595
	-0.510011	-0.336623	0.860108	-0.0670309
	-0.51338	-0.306573	0.862568	-0.113219
	-0.510377	-0.262864	0.870235	-0.125924
	-0.494676	-0.207152	0.818846	-0.10395
	-0.461038	-0.150987	0.770084	-0.0719068
	-0.444541	-0.116354	0.761987	-0.00662168
	-0.466775	-0.105816	0.782028	0.0827081
	-0.499071	-0.0963097	0.844518	0.131402
	-0.507948	-0.10167	0.927495	0.135603
	-0.505406	-0.133363	0.925574	0.123473
	-0.513619	-0.179052	0.813164	0.0756254
	-0.529136	-0.212999	0.755946	-0.0162387
	-0.546399	-0.238276	0.830651	-0.0810244
	-0.552762	-0.25036	0.951734	-0.0913139
	-0.528672	-0.232617	1.04017	-0.0958927
	-0.489739	-0.204569	1.08098	-0.0928976
	-0.481822	-0.181299	1.02987	-0.0425418
	-0.496288	-0.147479	0.919756	0.0478191
	-0.482843	-0.106285	0.892322	0.138737
	-0.442183	-0.0917631	0.946242	0.219561
	-0.405754	-0.106193	0.97831	0.233762
	-0.391985	-0.12214	0.971629	0.13457
	-0.401935	-0.138711	0.957806	-0.00482116
	-0.429476	-0.153454	0.892474	-0.0841051
	-0.444438	-0.149744	0.787277	-0.112253
	-0.445699	-0.147269	0.723635	-0.136311
	-0.472104	-0.140803	0.673302	-0.141318
	-0.541712	-0.149908	0.613707	-0.138643
	-0.609967	-0.160311	0.632732	-0.152825
	-0.628299	-0.188571	0.789413	-0.157281
	-0.610289	-0.235719	0.950965	-0.12393
	-0.58742	-0.267547	1.011	-0.0905587
	-0.571219	-0.274324	1.00061	-0.0683443
	-0.570032	-0.276176	0.949125	-0.014951
	-0.577497	-0.260187	0.877735	0.0453719
	-0.563526	-0.220032	0.841924	0.0725324
	-0.535694	-0.189339	0.854099	0.0922332
	-0.541935	-0.180967	0.837632	0.126044
	-0.577846	-0.174629	0.821012	0.129811
	-0.606278	-0.164589	0.871831	0.104775
	-0.623002	-0.158645	0.938616	0.101463
	-0.636394	-0.145056	0.930498	0.0940438
	-0.640833	-0.130987	0.866834	0.0469837
	-0.648694	-0.134508	0.80108	0.00190156
	-0.679349	-0.14524	0.738744	0.0158523
	-0.707306	-0.137676	0.746899	0.0663154
	-0.706701	-0.124868	0.842033	0.125342
	-0.693418	-0.130844	0.905197	0.16513
	-0.700916	-0.136271	0.839457	0.130182
	-0.727738	-0.12849	0.725536	0.028261
	-0.772546	-0.120212	0.670455	-0.0538295
	-0.82843	-0.115046	0.659465	-0.0774245
	-0.855406	-0.100679	0.684546	-0.0890962
	-0.829946	-0.0865469	0.724862	-0.079135
	-0.788068	-0.0815991	0.724041	-0.0163246
	-0.76046	-0.0656586	0.665238	0.0523794
	-0.729254	-0.0445837	0.65767	0.071294
	-0.694143	-0.0408021	0.733382	0.0643168
	-0.67278	-0.0442115	0.788515	0.0632308
	-0.664038	-0.0252514	0.792584	0.0489047
	-0.67535	0.0167648	0.772569	0.0290131
	-0.710787	0.0685029	0.727212	0.0108144
	-0.731227	0.127384	0.671213	-0.035622
	-0.703033	0.176245	0.702664	-0.102924
	-0.664015	0.199926	0.802274	-0.121749
	-0.660207	0.21491	0.868512	-0.0848399
	-0.684879	0.253687	0.904568	-0.0738155
	-0.703888	0.305869	0.958087	-0.108664
	-0.699142	0.365018	0.995908	-0.159086
	-0.669994	0.423526	0.98393	-0.212786
	-0.627012	0.486833	0.990605	-0.246839
	-0.600946	0.551545	1.01951	-0.198793
	-0.589785	0.631695	1.04013	-0.0823848
	-0.558888	0.7403	1.10843	0.0312633
	-0.499379	0.847208	1.24626	0.150278
	-0.453215	0.943687	1.33942	0.307835
	-0.431592	1.05243	1.32612	0.468447
	-0.407703	1.16685	1.30832	0.587762
	-0.371002	1.25851	1.31763	0.691601
	-0.316308	1.33382	1.33802	0.793601
	-0.234858	1.41621	1.40764	0.898536
	-0.148082	1.49967	1.54395	1.05221
	-0.0903298	1.58153	1.6724	1.24841
	-0.0503632	1.67437	1.78968	1.40246
	-0.000380589	1.77325	1.96536	1.49541
	0.0572015	1.85912	2.13921	1.61949
	0.114194	1.9436	2.24802	1.79253
	0.173503	2.0437	2.33829	1.94962
	0.235256	2.13724	2.45842	2.06518
	0.291153	2.21882	2.55252	2.13219
	0.356328	2.31127	2.63052	2.14814
	0.434819	2.40547	2.75269	2.1854
	0.485827	2.48014	2.87599	2.32334
	0.489557	2.56255	2.95917	2.49046
	0.496406	2.66469	3.04968	2.58409
	0.555763	2.75048	3.16308	2.60782
	0.650638	2.808	3.21847	2.61637
	0.751559	2.857	3.23477	2.62862
	0.821862	2.9014	3.27174	2.6732
	0.835742	2.94475	3.30179	2.76946
	0.828927	3.01366	3.33221	2.86821
	0.871992	3.0977	3.43879	2.95447
	0.964344	3.16718	3.60736	3.07467
	1.05207	3.23059	3.70924	3.2303
	1.11698	3.30686	3.7486	3.34911
	1.17371	3.38175	3.79544	3.42327
	1.23362	3.43004	3.85704	3.49965
	1.30801	3.46981	3.92749	3.57169
	1.39571	3.51574	4.03601	3.62853
	1.46191	3.55466	4.1513	3.68139
	1.48654	3.58091	4.19579	3.70261
	1.50939	3.62533	4.22655	3.64493
	1.56461	3.65696	4.31086	3.57231
	1.63254	3.68138	4.42334	3.56492
	1.68534	3.73	4.52575	3.58754
	1.72121	3.80147	4.66119	3.5794
	1.73098	3.86846	4.8147	3.54553
	1.72446	3.92456	4.9134	3.50996
	1.74417	3.96931	4.98486	3.47851
	1.79166	3.98481	5.05349	3.50548
	1.82703	3.96814	5.06436	3.59651
	1.84861	3.97704	5.01987	3.66574
	1.89368	4.00486	5.05381	3.66279
	1.96248	4.03483	5.1874	3.64
	2.03701	4.06043	5.31032	3.63536
	2.09556	4.08657	5.39632	3.62857
	2.11397	4.10244	5.447	3.63179
	2.08716	4.10979	5.4337	3.64619
	2.05009	4.13387	5.38346	3.63517
	2.04259	4.16543	5.40354	3.61381
	2.04142	4.18017	5.46514	3.64265
	2.03372	4.19357	5.48487	3.68345
	2.0432	4.23272	5.49385	3.63973
	2.08964	4.28702	5.52314	3.54202
	2.15648	4.34526	5.51769	3.47375
	2.22088	4.4073	5.47638	3.44872
	2.25852	4.4524	5.48862	3.44379
	2.24197	4.46722	5.52308	3.45458
	2.1847	4.48071	5.53875	3.43834
	2.15328	4.51743	5.58652	3.38766
	2.165	4.55581	5.67412	3.39133
	2.17433	4.58376	5.69819	3.47238
	2.15965	4.61133	5.65492	3.53828
	2.13232	4.63491	5.64258	3.53313
	2.10246	4.64685	5.64636	3.49352
	2.09026	4.6637	5.6459	3.42403
	2.10156	4.68397	5.69203	3.34349
	2.11016	4.67344	5.75549	3.31964
	2.08754	4.64423	5.71487	3.3562
	2.06536	4.64136	5.59313	3.3953
	2.08134	4.66353	5.51721	3.44538
	2.11628	4.68129	5.50386	3.5445
	2.13217	4.68469	5.54857	3.63464
	2.12962	4.69462	5.65646	3.66126
	2.12257	4.69972	5.7598	3.65107
	2.1252	4.72174	5.74475	3.62877
	2.16482	4.7657	5.66792	3.59203
	2.22648	4.8273	5.63621	3.57098
	2.24796	4.89236	5.62043	3.58499
	2.22984	4.96783	5.59467	3.58545
	2.23518	5.0316	5.60531	3.57606
	2.28453	5.05372	5.65999	3.6071
	2.34681	5.04912	5.67953	3.66209
	2.40399	5.04708	5.6867	3.6678
	2.43631	5.05448	5.70334	3.62768
	2.43898	5.07051	5.67681	3.59215
	2.45164	5.11023	5.63262	3.57101
	2.51241	5.16219	5.67272	3.58697
	2.58583	5.20322	5.76645	3.65228
	2.61686	5.24544	5.78044	3.70854
	2.60282	5.30686	5.73109	3.67792
	2.5694	5.36302	5.68909	3.60446
	2.54811	5.38931	5.66021	3.57507
	2.56466	5.39791	5.6598	3.59267
	2.61376	5.39227	5.72033	3.6224
	2.64231	5.38281	5.7682	3.64199
	2.63658	5.39906	5.71089	3.62985
	2.64505	5.44686	5.64464	3.58497
	2.68553	5.49395	5.66051	3.56951
	2.71559	5.52335	5.71236	3.59
	2.70058	5.55109	5.73006	3.56881
	2.63903	5.5724	5.73698	3.49797
	2.5518	5.57581	5.72818	3.46505
	2.50077	5.57262	5.71826	3.50941
	2.53176	5.58089	5.82178	3.58539
	2.60208	5.59218	6.01278	3.6844
	2.6426	5.60988	6.10546	3.79263
	2.64028	5.65886	6.0232	3.86662
	2.62992	5.72494	5.9042	3.91057
	2.62952	5.77741	5.84057	3.97415
	2.6494	5.81963	5.85933	4.03487
	2.6908	5.85846	5.96629	4.03183
	2.73488	5.86784	6.06878	3.99236
	2.76151	5.84965	6.0643	3.95603
	2.78631	5.83813	6.02211	3.92637
	2.82664	5.83724	6.07395	3.92251
	2.85021	5.84842	6.15602	3.96833
	2.84405	5.89877	6.16544	4.00275
	2.84058	5.97836	6.14097	3.98686
	2.85834	6.03731	6.13753	3.99055
	2.87673	6.0614	6.14729	4.03866
	2.88703	6.07157	6.19628	4.0665
	2.87694	6.07979	6.31385	4.05927
	2.83326	6.09912	6.38064	4.06882
	2.79427	6.15574	6.35114	4.08913
	2.80833	6.24344	6.33845	4.10385
	2.85674	6.31542	6.41134	4.14272
	2.88636	6.35851	6.50137	4.18551
	2.88982	6.38318	6.57025	4.18979
	2.89216	6.38026	6.60977	4.18565
	2.90497	6.35269	6.55932	4.21902
	2.94479	6.33422	6.47319	4.23775
	3.01623	6.33289	6.46153	4.21592
	3.08381	6.33371	6.50325	4.20222
	3.10428	6.35136	6.4719	4.21834
	3.1451	6.39439	6.38857	4.26029
	3.2022	6.43833	6.34288	4.34968
	3.24743	6.46688	6.33415	4.46096
	3.25778	6.49149	6.35749	4.49539
	3.24686	6.50898	6.41682	4.44775
	3.22388	6.5169	6.44623	4.39461
	3.20802	6.54144	6.38773	4.35216
	3.24124	6.59434	6.36148	4.27816
	3.29778	6.65821	6.4526	4.1837
	3.32941	6.71024	6.53767	4.10894
	3.33679	6.74854	6.51573	4.0569
	3.34685	6.76094	6.43053	4.05065
	3.35099	6.74222	6.35541	4.09995
	3.33988	6.72625	6.3216	4.14192
	3.32804	6.73813	6.39391	4.10926
	3.31621	6.76817	6.49713	4.04521
	3.30358	6.81291	6.47037	4.02415
	3.31957	6.88787	6.33578	4.04941
	3.37921	6.96577	6.27108	4.11918
	3.44435	7.01422	6.32543	4.22246
	3.48155	7.04481	6.39556	4.29974
	3.50603	7.06588	6.45733	4.30623
	3.52372	7.06364	6.48005	4.30356
	3.53053	7.04639	6.43225	4.33077
	3.53506	7.04801	6.37641	4.34642
	3.53655	7.07271	6.39963	4.34584
	3.50891	7.1108	6.41759	4.37211
	3.47202	7.16914	6.34285	4.41698
	3.47361	7.2482	6.29625	4.43886
	3.51621	7.31669	6.37646	4.45718
	3.57154	7.35393	6.52664	4.47561
	3.61934	7.36479	6.67287	4.4616
	3.64979	7.33725	6.75744	4.43877
	3.6555	7.28018	6.67525	4.46114
	3.65554	7.2502	6.45534	4.50916
	3.66778	7.27508	6.30016	4.54531
	3.67225	7.32254	6.27233	4.60833
	3.6534	7.37651	6.27673	4.69989
	3.64899	7.43874	6.26862	4.7648
	3.69961	7.47738	6.30748	4.8056
	3.77843	7.48323	6.38797	4.86577
	3.83299	7.48945	6.51405	4.91815
	3.84776	7.5054	6.69615	4.93077
	3.81061	7.51145	6.80777	4.94743
	3.74799	7.51834	6.72688	4.96545
	3.72496	7.53879	6.5618	4.94768
	3.76456	7.55371	6.51796	4.91762
	3.81347	7.55532	6.57234	4.92168
	3.84651	7.56985	6.62297	4.92994
	3.88286	7.60476	6.62794	4.92799
	3.93192	7.63604	6.56987	4.95481
	3.97542	7.66718	6.49285	4.993
	3.99723	7.70532	6.54212	4.9984
	3.97595	7.72684	6.73004	4.99316
	3.90979	7.73044	6.86035	5.00606
	3.85332	7.74564	6.85528	4.99915
	3.85801	7.76706	6.81064	4.97563
	3.90163	7.77768	6.78609	4.97905
	3.93063	7.80312	6.766	4.97819
	3.94208	7.85174	6.76502	4.93152
	3.94397	7.89473	6.76743	4.8901
	3.93337	7.91819	6.70657	4.91323
	3.93568	7.93443	6.6559	4.96973
	3.97281	7.93714	6.71585	5.0427
	4.01004	7.92585	6.8375	5.137
	4.02162	7.93605	6.8808	5.20952
	4.03558	7.97106	6.85431	5.22308
	4.05579	7.99612	6.81562	5.21122
	4.05713	8.001	6.75961	5.20861
	4.04153	8.01268	6.72123	5.19542
	4.01746	8.03779	6.71343	5.18803
	3.98773	8.07004	6.67093	5.20458
	3.97268	8.11642	6.56959	5.20755
	3.98947	8.17034	6.55093	5.16598
	3.99907	8.21124	6.64604	5.13497
	3.97301	8.2403	6.71092	5.15268
	3.94373	8.27166	6.65404	5.17258
	3.95069	8.27574	6.522	5.18167
	3.97525	8.23467	6.38133	5.20429
	3.98814	8.18783	6.28789	5.22212
	3.98341	8.16557	6.32727	5.20666
	3.9557	8.16673	6.44829	5.19549
	3.92178	8.19255	6.50128	5.20241
	3.92176	8.2426	6.48449	5.19082
	4.00882	8.28153	6.50512	5.18647
	4.10071	8.28907	6.55458	5.23203
	4.16773	8.29176	6.55785	5.29819
	4.21542	8.30429	6.55597	5.33895
	4.24043	8.30558	6.54355	5.38197
	4.24622	8.29529	6.49992	5.42819
	4.21448	8.30154	6.5148	5.4375
	4.2473	8.32109	6.66139	5.42847
	4.25353	8.34461	6.8034	5.43383
	4.2497	8.38036	6.82544	5.42268
	4.27466	8.41105	6.79433	5.38064
	4.32319	8.40365	6.74858	5.38437
	4.36417	8.38405	6.68092	5.44807
	4.38285	8.39101	6.62059	5.51546
	4.37908	8.40719	6.58071	5.56653
	4.34833	8.41668	6.48076	5.60033
	4.33016	8.43003	6.36655	5.58296
	4.361	8.44132	6.38744	5.54409
	4.40839	8.4356	6.52518	5.56773
	4.42174	8.43358	6.63585	5.6313
	4.41482	8.44737	6.69118	5.65737
	4.41283	8.45525	6.74824	5.64511
	4.40549	8.46144	6.80167	5.61775
	4.40349	8.49381	6.89645	5.54474
	4.41791	8.54348	7.05896	5.42661
	4.42798	8.57788	7.13931	5.30917
	4.43089	8.60593	7.03807	5.19176
	4.45589	8.6385	6.89012	5.09287
	4.49638	8.655	6.85301	5.08273
	4.51662	8.6545	6.88277	5.178
	4.51709	8.65892	6.9246	5.28335
	4.51569	8.66073	6.9504	5.34336
	4.50963	8.64395	6.93491	5.37021
	4.49742	8.64078	6.90432	5.35361
	4.49788	8.65982	6.94619	5.29997
	4.50772	8.66874	7.02866	5.25929
	4.50895	8.66129	7.01101	5.24446
	4.51984	8.65632	6.93428	5.20334
	4.55054	8.6476	6.94788	5.16015
	4.57084	8.63154	7.08301	5.17245
	4.56335	8.63236	7.2352	5.22012
	4.56004	8.64832	7.34307	5.26184
	4.56843	8.65669	7.35274	5.31416
	4.58034	8.66475	7.24903	5.3855
	4.60369	8.69287	7.16997	5.44293
	4.63259	8.71911	7.21507	5.49918
	4.63745	8.72076	7.28264	5.55972
	4.63027	8.71416	7.25825	5.56377
	4.64137	8.70571	7.21779	5.48788
	4.65862	8.68706	7.23264	5.40804
	4.65822	8.67464	7.26172	5.37564
	4.64423	8.69395	7.30085	5.35092
	4.63115	8.72625	7.32857	5.33331
	4.62107	8.75268	7.2864	5.34659
	4.62458	8.78233	7.19028	5.37356
	4.65549	8.79864	7.18599	5.40328
	4.69253	8.77823	7.26873	5.4817
	4.71624	8.74298	7.30372	5.5954
	4.74274	8.73196	7.27181	5.66347
	4.7857	8.74695	7.25373	5.67987
	4.8242	8.77968	7.26648	5.68125
	4.84963	8.82977	7.30974	5.66694
	4.87257	8.87532	7.4304	5.64303
	4.87621	8.88328	7.54298	5.65765
	4.86313	8.87029	7.55606	5.68472
	4.86439	8.86563	7.54777	5.66723
	4.8828	8.84952	7.6101	5.64325
	4.88042	8.81279	7.65473	5.66071
	4.8608	8.78428	7.60819	5.67762
	4.85939	8.77054	7.52234	5.66455
	4.88452	8.75613	7.41713	5.67116
	4.92379	8.75883	7.32011	5.70216
	4.96907	8.78828	7.31741	5.72003
	4.99977	8.80696	7.40139	5.73054
	4.99092	8.80517	7.43502	5.71629
	4.97758	8.80264	7.40148	5.61941
	5.00906	8.79521	7.42509	5.46942
	5.06458	8.77535	7.49346	5.38847
	5.10078	8.76771	7.51909	5.40342
	5.11767	8.77787	7.489	5.47231
	5.12201	8.77857	7.42995	5.56474
	5.1086	8.77296	7.33265	5.63694
	5.10421	8.78219	7.30415	5.64618
	5.11156	8.79615	7.43189	5.64959
	5.08566	8.7952	7.59767	5.725
	5.02629	8.80028	7.66578	5.81838
	4.99066	8.82909	7.66912	5.85665
	5.00149	8.87926	7.68872	5.85006
	5.03087	8.94999	7.71807	5.8239
	5.06147	9.02541	7.77987	5.76073
	5.06875	9.0569	7.84399	5.68721
	5.04847	9.02542	7.80258	5.64406
	5.0235	8.98372	7.64885	5.61
	5.04126	8.95855	7.55432	5.5844
	5.08208	8.93841	7.61221	5.60728
	5.09531	8.93649	7.72079	5.66032
	5.08151	8.9691	7.80609	5.67614
	5.06971	9.01393	7.85125	5.66998
	5.06593	9.03772	7.81403	5.68615
	5.06704	9.03773	7.71366	5.70486
	5.07026	9.01241	7.66672	5.71985
	5.04477	8.96969	7.68559	5.76543
	4.98461	8.94509	7.65978	5.83856
	4.9406	8.95687	7.6242	5.87285
	4.93433	8.97772	7.65735	5.86175
	4.93636	8.98327	7.74025	5.82696
	4.93285	8.98679	7.82173	5.7655
	4.93451	8.99146	7.93152	5.69023
	4.93941	8.99074	8.02351	5.63923
	4.95526	8.99515	8.03135	5.60189
	4.98928	9.01167	8.03542	5.5456
	5.02129	9.01234	8.08389	5.52891
	5.03351	8.98928	8.0787	5.58928
	5.04824	8.9739	7.96593	5.65151
	5.09546	8.97122	7.88159	5.63974
	5.14568	8.96599	7.89036	5.58632
	5.16014	8.96337	7.94007	5.53367
	5.14122	8.97142	8.00502	5.4877
	5.10938	8.97322	8.05247	5.4844
	5.06929	8.9696	8.00338	5.52268
	5.05012	8.98098	7.91659	5.53643
	5.07857	8.98989	7.94655	5.50757
	5.11969	8.96304	8.04105	5.49913
	5.13667	8.90907	8.04439	5.52092
	5.14229	8.85792	7.97444	5.53059
	5.14666	8.81868	7.92105	5.54615
	5.15027	8.81137	7.90176	5.57707
	5.15298	8.85413	7.92841	5.59229
	5.14556	8.91482	8.00386	5.59504
	5.10753	8.95284	7.98297	5.6319
	5.06077	8.98107	7.83054	5.65924
	5.05329	9.01199	7.71292	5.62455
	5.07976	9.01495	7.73387	5.57682
	5.08367	8.98291	7.77689	5.56747
	5.05696	8.94072	7.76486	5.57328
	5.03542	8.89939	7.7428	5.58674
	5.03196	8.86927	7.7149	5.62803
	5.04825	8.87664	7.70437	5.65119
	5.07759	8.91346	7.75014	5.63605
	5.07967	8.94173	7.79207	5.63461
	5.02936	8.95866	7.72171	5.65352
	4.9933	8.98045	7.63129	5.6449
	5.02681	8.9931	7.67026	5.63042
	5.09282	8.98225	7.80371	5.66065
	5.13649	8.97425	7.92851	5.70167
	5.15497	8.979	8.00608	5.73123
	5.15994	8.98165	8.00987	5.78004
	5.17093	8.99273	7.92822	5.83356
	5.21434	9.01778	7.87718	5.8432
	5.26612	9.02805	7.93211	5.83491
	5.27926	9.01418	7.98344	5.85589
	5.26448	9.00919	7.9539	5.86483
	5.2753	9.01554	7.90742	5.83097
	5.32385	9.01623	7.92001	5.7701
	5.38191	9.01899	7.95811	5.69844
	5.43375	9.02834	8.01851	5.63172
	5.45781	9.0304	8.06291	5.63909
	5.43517	9.03501	8.03143	5.72808
	5.39614	9.06985	7.98143	5.79924
	5.3905	9.12047	8.05134	5.79885
	5.40605	9.15114	8.18858	5.77107
	5.41541	9.14945	8.19483	5.74898
	5.43159	9.12602	8.08103	5.7239
	5.44924	9.09585	7.99119	5.72549
	5.44262	9.08719	7.99645	5.75313
	5.41665	9.12625	8.08686	5.74347
	5.38969	9.1854	8.22608	5.6849
	5.35269	9.21503	8.27761	5.63395
	5.3172	9.20564	8.17451	5.60065
	5.30772	9.17568	8.09501	5.54598
	5.31668	9.13281	8.17491	5.49742
	5.31857	9.09478	8.31108	5.48756
	5.31437	9.08596	8.37032	5.49968
	5.31858	9.0924	8.37674	5.53009
	5.32226	9.09867	8.36398	5.58467
	5.31876	9.12785	8.35512	5.60884
	5.31535	9.19308	8.42673	5.55421
	5.30312	9.25192	8.51488	5.49727
	5.27017	9.27168	8.4679	5.50407
	5.25406	9.26455	8.31297	5.548
	5.29963	9.24115	8.25717	5.58895
	5.37009	9.20792	8.31807	5.6232
	5.4085	9.18616	8.39018	5.6182
	5.40103	9.18301	8.42614	5.57452
	5.35423	9.1794	8.39876	5.57837
	5.29106	9.19108	8.29841	5.65277
	5.26219	9.24229	8.2313	5.72071
	5.27346	9.29925	8.28784	5.74636
	5.26678	9.31705	8.32684	5.76673
	5.22657	9.30665	8.24456	5.77541
	5.18838	9.28885	8.14473	5.76248
	5.16962	9.26164	8.12706	5.76891
	5.1525	9.24597	8.1488	5.78032
	5.14044	9.26026	8.18449	5.74183
	5.14325	9.28448	8.21677	5.67874
	5.1545	9.31102	8.16151	5.66343
	5.19092	9.36608	8.05599	5.6795
	5.27446	9.44266	8.03819	5.69498
	5.36203	9.49317	8.09717	5.71743
	5.38279	9.50496	8.08753	5.71542
	5.33925	9.49297	7.98917	5.65728
	5.27512	9.46629	7.8905	5.5962
	5.21992	9.44214	7.82221	5.59572
	5.20832	9.45706	7.84043	5.60651
	5.24633	9.50283	7.95735	5.58688
	5.28371	9.54008	8.06124	5.53968
	5.29097	9.57013	8.03495	5.45552
	5.30706	9.59848	7.99688	5.33515
	5.34964	9.60226	8.07673	5.25227
	5.39322	9.57568	8.1949	5.24803
	5.42237	9.54923	8.23231	5.2588
	5.43706	9.52731	8.18468	5.26264
	5.43204	9.50459	8.10278	5.29717
	5.41458	9.5072	8.04066	5.34239
	5.41785	9.54317	8.09989	5.32941
	5.43926	9.57955	8.22521	5.27194
	5.44825	9.59694	8.22988	5.23118
	5.44347	9.604	8.07824	5.22285
	5.45075	9.58865	7.92871	5.25694
	5.46437	9.54085	7.87399	5.32895
	5.47551	9.48532	7.86909	5.38612
	5.49383	9.44625	7.88664	5.38467
	5.50181	9.42676	7.86502	5.3869
	5.47501	9.43119	7.74725	5.44776
	5.43684	9.47363	7.62899	5.52175
	5.42251	9.53083	7.64462	5.57054
	5.42083	9.5722	7.72657	5.58958
	5.42649	9.6027	7.71869	5.55677
	5.45566	9.62657	7.67615	5.46327
	5.49473	9.62801	7.68523	5.39069
	5.51556	9.61954	7.73898	5.36535
	5.50822	9.6318	7.80237	5.33017
	5.47623	9.65015	7.85057	5.28522
	5.41701	9.65532	7.78411	5.2789
	5.36529	9.66777	7.62358	5.28763
	5.3691	9.70325	7.56904	5.26415
	5.41324	9.73721	7.689	5.2383
	5.43736	9.75994	7.85	5.22561
	5.43074	9.78448	7.94129	5.20842
	5.42363	9.79959	7.96831	5.21938
	5.41531	9.80262	7.90593	5.28675
	5.41108	9.81728	7.79271	5.33925
	5.42395	9.85013	7.74971	5.31421
	5.42808	9.8744	7.7574	5.26915
	5.39884	9.89335	7.69854	5.25099
	5.37601	9.92176	7.59899	5.25314
	5.38952	9.9355	7.58812	5.28107
	5.41207	9.92546	7.65656	5.32748
	5.43004	9.91879	7.75372	5.332
	5.44063	9.9213	7.85713	5.29956
	5.41875	9.91341	7.86469	5.3185
	5.35639	9.91628	7.72882	5.38842
	5.29416	9.9487	7.58925	5.44835
	5.25817	9.97722	7.56603	5.49089
	5.2284	9.97428	7.56066	5.54116
	5.20722	9.95535	7.52748	5.57424
	5.21044	9.93107	7.51648	5.60633
	5.22233	9.90342	7.51824	5.67462
	5.21633	9.89717	7.46269	5.73529
	5.18595	9.91261	7.37825	5.7308
	5.20661	9.91643	7.30343	5.69579
	5.20387	9.90037	7.20844	5.68246
	5.19663	9.89734	7.13993	5.6682
	5.21097	9.91345	7.16515	5.65006
	5.22324	9.92539	7.23377	5.65526
	5.21065	9.93929	7.24039	5.66206
	5.20011	9.95961	7.21574	5.64633
	5.20606	9.97381	7.21529	5.6422
	5.22534	9.99175	7.21394	5.66624
	5.26453	10.0361	7.23521	5.66383
	5.31416	10.078	7.3112	5.63991
	5.33857	10.0821	7.35384	5.63365
	5.33113	10.067	7.2873	5.64222
	5.32669	10.0516	7.22387	5.65075
	5.33345	10.0345	7.24498	5.69241
	5.32996	10.0285	7.27941	5.77464
	5.31173	10.0486	7.2946	5.84151
	5.28703	10.0679	7.31423	5.89144
	5.25134	10.0658	7.33922	5.94548
	5.22116	10.0569	7.37226	5.96946
	5.23213	10.048	7.50545	5.921
	5.26575	10.0276	7.69663	5.84746
	5.28213	9.99927	7.78381	5.82107
	5.28266	9.98753	7.72288	5.81792
	5.28389	9.98882	7.63103	5.85758
	5.26978	9.99724	7.56528	5.94393
	5.23966	10.0267	7.51388	5.99815
	5.21164	10.0653	7.51387	5.96108
	5.18166	10.0776	7.51526	5.89636
	5.15193	10.066	7.45225	5.85786
	5.14249	10.0619	7.41481	5.82967
	5.15455	10.0603	7.50894	5.83033
	5.15954	10.0522	7.61413	5.88574
	5.16191	10.0592	7.59165	5.95762
	5.19017	10.0862	7.50709	5.9983
	5.2266	10.1138	7.44222	6.0268
	5.25362	10.154	7.42267	6.0291
	5.26174	10.217	7.48069	5.97635
	5.26621	10.2613	7.58826	5.92439
	5.25097	10.26	7.59584	5.93719
	5.23062	10.2378	7.47753	5.98132
	5.23957	10.213	7.40865	6.00792
	5.26264	10.1807	7.45043	6.03511
	5.27274	10.1638	7.51092	6.0329
	5.27951	10.1762	7.51628	5.96518
	5.28705	10.1947	7.47752	5.88467
	5.27738	10.2153	7.39056	5.85261
	5.27012	10.2545	7.3562	5.8354
	5.28304	10.2863	7.47594	5.82016
	5.29058	10.2702	7.64688	5.84391
	5.27408	10.2267	7.7115	5.87104
	5.2581	10.1868	7.69468	5.85194
	5.25239	10.1521	7.67199	5.81203
	5.23947	10.1402	7.60266	5.77407
	5.23472	10.1735	7.52293	5.70416
	5.26456	10.2298	7.51438	5.62171
	5.31768	10.2717	7.55742	5.58258
	5.36714	10.3065	7.60812	5.57165
	5.40699	10.3255	7.7007	5.57914
	5.41542	10.293	7.82462	5.63802
	5.37141	10.2166	7.87246	5.73616
	5.31611	10.149	7.83759	5.7905
	5.29833	10.1158	7.77814	5.7826
	5.31185	10.1131	7.69378	5.74098
	5.33767	10.146	7.57998	5.65732
	5.37789	10.1942	7.52556	5.55385
	5.40693	10.2268	7.5598	5.4965
	5.39435	10.2493	7.57899	5.49387
	5.35177	10.2778	7.58455	5.48009
	5.30227	10.2846	7.63754	5.46821
	5.2565	10.2522	7.71172	5.50297
	5.22972	10.2174	7.7281	5.55945
	5.23659	10.2091	7.71912	5.59358
	5.24599	10.2251	7.69201	5.61553
	5.22731	10.2606	7.61838	5.63572
	5.20159	10.3053	7.55607	5.63515
	5.20004	10.3221	7.53801	5.64244
	5.20806	10.2959	7.49027	5.6824
	5.20875	10.2606	7.37331	5.71653
	5.21047	10.2407	7.30864	5.7127
	5.20289	10.2387	7.35408	5.70726
	5.18384	10.2573	7.44762	5.71745
	5.18289	10.2978	7.57926	5.70755
	5.20542	10.3263	7.76588	5.68984
	5.2132	10.3224	7.92089	5.68316
	5.19735	10.3138	7.96965	5.65373
	5.18402	10.3108	8.00338	5.58655
	5.17264	10.2952	8.04976	5.54401
	5.16127	10.2762	8.0445	5.53903
	5.16325	10.2778	8.02805	5.52526
	5.17182	10.2881	8.07002	5.52634
	5.15503	10.3012	8.12202	5.57417
	5.11829	10.3304	8.15343	5.62901
	5.0911	10.3557	8.22198	5.65385
	5.06896	10.3452	8.23985	5.68104
	5.04519	10.3214	8.12262	5.69299
	5.04329	10.3091	7.96768	5.65359
	5.07061	10.2788	7.91217	5.60829
	5.08645	10.2205	7.93344	5.60101
	5.08344	10.1736	7.99643	5.5791
	5.07538	10.1666	8.10086	5.50169
	5.04426	10.1961	8.15582	5.41958
	4.99189	10.2565	8.10961	5.36862
	4.96543	10.3173	8.04986	5.36417
	4.97872	10.3238	8.03926	5.44622
	4.99559	10.2872	8.00353	5.5857
	5.0047	10.2597	7.95722	5.67679
	4.9982	10.2533	7.98439	5.70625
	4.95246	10.2557	8.03075	5.75991
	4.88436	10.2784	8.02092	5.83365
	4.84625	10.3076	8.0054	5.87717
	4.84387	10.3023	8.01888	5.88426
	4.83831	10.2679	7.99046	5.84458
	4.82622	10.2425	7.9379	5.73594
	4.82278	10.2281	7.90818	5.6224
	4.82421	10.2138	7.85072	5.57314
	4.82961	10.2148	7.7508	5.54199
	4.85116	10.2217	7.6866	5.49726
	4.86904	10.216	7.69324	5.48223
	4.85777	10.2178	7.70847	5.51281
	4.84193	10.2583	7.76103	5.5322
	4.84766	10.3265	7.87133	5.53837
	4.85103	10.3856	7.96119	5.55616
	4.84758	10.4256	7.96895	5.55654
	4.85937	10.4336	7.97005	5.52383
	4.87693	10.4052	8.00987	5.48556
	4.88347	10.3829	8.0363	5.44034
	4.89137	10.405	8.06997	5.36267
	4.90238	10.4521	8.11793	5.30428
	4.89806	10.4941	8.10834	5.3178
	4.87842	10.5351	8.02981	5.37733
	4.86262	10.5572	8.00543	5.45231
	4.84352	10.5397	8.05419	5.5352
	4.8167	10.5054	8.06618	5.59114
	4.80455	10.4859	8.03385	5.57846
	4.81219	10.4709	8.02046	5.5525
	4.81017	10.4506	8.05013	5.56492
	4.79128	10.4394	8.11823	5.57763
	4.77924	10.4399	8.2278	5.55537
	4.76739	10.4468	8.27593	5.53641
	4.75038	10.4684	8.17777	5.54441
	4.7516	10.5063	8.05745	5.55182
	4.76904	10.5278	8.0455	5.56993
	4.77612	10.5214	8.08799	5.58948
	4.77804	10.5161	8.06896	5.55967
	4.79275	10.5168	8.00831	5.49595
	4.79854	10.5037	7.90189	5.49285
	4.78664	10.4867	7.77246	5.55965
	4.77755	10.4843	7.7436	5.62422
	4.77673	10.4821	7.85493	5.66862
	4.76808	10.4806	7.95967	5.6953
	4.77207	10.4978	7.97695	5.68218
	4.81375	10.5103	7.99595	5.65448
	4.86586	10.4686	8.01281	5.67136
	4.89942	10.4369	7.97632	5.70029
	4.92165	10.4319	7.9061	5.68574
	4.93114	10.436	7.82051	5.67689
	4.90468	10.4413	7.69833	5.71976
	4.86446	10.4549	7.60025	5.76886
	4.84149	10.4587	7.59454	5.76856
	4.82115	10.4332	7.58373	5.72325
	4.79966	10.4042	7.497	5.63124
	4.79389	10.3832	7.42217	5.53908
	4.80196	10.3418	7.4324	5.53516
	4.79726	10.2868	7.46648	5.60461
	4.80237	10.2494	7.5064	5.6366
	4.82098	10.2273	7.57038	5.5968
	4.81738	10.211	7.56779	5.54172
	4.7871	10.2187	7.48242	5.47466
	4.76222	10.2381	7.42727	5.40515
	4.75363	10.2342	7.44935	5.3827
	4.7471	10.2185	7.44788	5.41335
	4.74817	10.2217	7.41043	5.45625
	4.75385	10.242	7.36956	5.52401
	4.74345	10.2636	7.31313	5.62472
	4.71765	10.2899	7.28629	5.68677
	4.70937	10.3032	7.35888	5.68036
	4.72334	10.2793	7.47623	5.65956
	4.74349	10.2426	7.50062	5.66111
	4.75723	10.2247	7.46588	5.66439
	4.75337	10.2152	7.48494	5.67025
	4.71745	10.2004	7.57768	5.68465
	4.67453	10.2043	7.70536	5.66637
	4.65698	10.2216	7.83719	5.61385
	4.63875	10.2245	7.88951	5.57877
	4.58661	10.2185	7.80274	5.57771
	4.52998	10.2158	7.71254	5.56864
	4.5041	10.1994	7.72005	5.5602
	4.50664	10.1696	7.74051	5.56153
	4.52107	10.1537	7.69338	5.52635
	4.53948	10.1363	7.64186	5.46189
	4.53816	10.1177	7.61772	5.44475
	4.50961	10.0967	7.57719	5.479
	4.48038	10.0899	7.54975	5.4784
	4.45688	10.0827	7.52795	5.42671
	4.41594	10.0532	7.47214	5.34327
	4.36157	10.0475	7.42363	5.22511
	4.32632	10.032	7.49367	5.10609
	4.30773	9.99497	7.62302	5.05275
	4.30792	9.95807	7.67554	5.056
	4.35291	9.9414	7.66792	5.06474
	4.43137	9.93013	7.65694	5.09884
	4.4966	9.92307	7.62994	5.16028
	4.53891	9.94407	7.59542	5.18566
	4.56735	9.97877	7.6123	5.16494
	4.57174	9.99761	7.59032	5.16295
	4.54432	10.006	7.45534	5.18337
	4.52199	10.0062	7.32695	5.18541
	4.51055	9.9724	7.30648	5.19916
	4.4912	9.91715	7.35273	5.23156
	4.4813	9.88242	7.43488	5.23472
	4.50142	9.87124	7.55978	5.21474
	4.52379	9.86741	7.6244	5.2307
	4.54007	9.87809	7.5871	5.25424
	4.57357	9.89945	7.54241	5.23927
	4.61177	9.89491	7.50459	5.21553
	4.61027	9.85782	7.4029	5.1915
	4.57639	9.81068	7.28225	5.15225
	4.54254	9.75182	7.26739	5.14364
	4.52027	9.68616	7.32963	5.21832
	4.5347	9.65135	7.40828	5.31453
	4.59706	9.64626	7.47321	5.37442
	4.66363	9.62595	7.46497	5.41253
	4.69118	9.5882	7.34138	5.4268
	4.65795	9.55706	7.23114	5.40299
	4.68196	9.52861	7.24254	5.3794
	4.67764	9.4988	7.25907	5.37799
	4.64901	9.48489	7.17554	5.33991
	4.6264	9.47206	7.03923	5.2687
	4.61548	9.43035	6.94413	5.24539
	4.60949	9.38701	6.93382	5.28509
	4.63045	9.37739	7.0546	5.33281
	4.67401	9.39791	7.22577	5.36722
	4.69762	9.42867	7.26207	5.39168
	4.68443	9.46061	7.1539	5.3725
	4.65554	9.46857	7.06072	5.32752
	4.62653	9.43828	7.05053	5.30733
	4.60567	9.3971	7.03535	5.31955
	4.61542	9.38715	7.00129	5.34009
	4.63979	9.37774	6.98462	5.3784
	4.64228	9.35908	6.98686	5.42348
	4.629	9.35359	7.02297	5.41105
	4.63262	9.35827	7.08668	5.34211
	4.64468	9.35947	7.08451	5.27603
	4.63547	9.36838	6.93516	5.24607
	4.60086	9.38711	6.77768	5.2393
	4.54621	9.39385	6.73932	5.28055
	4.4898	9.38714	6.78155	5.36876
	4.48439	9.38596	6.83905	5.42857
	4.53635	9.37816	6.91755	5.42465
	4.6014	9.35256	6.97306	5.40348
	4.63495	9.33025	6.95279	5.39754
	4.648	9.32181	6.94572	5.39528
	4.64891	9.31018	6.98361	5.41698
	4.61815	9.29175	6.96875	5.45325
	4.56477	9.28849	6.87258	5.44535
	4.52732	9.29137	6.79223	5.40809
	4.44976	9.2867	6.74495	5.40504
	4.43835	9.29646	6.70935	5.422
	4.47636	9.33787	6.74582	5.39428
	4.52836	9.37411	6.83285	5.34313
	4.54834	9.38418	6.8709	5.30126
	4.54582	9.38171	6.87542	5.26249
	4.54591	9.35438	6.92932	5.24811
	4.53362	9.3015	6.95506	5.29059
	4.51024	9.25699	6.8817	5.32993
	4.46348	9.22886	6.8261	5.28954
	4.41649	9.19266	6.84948	5.21248
	4.39301	9.16734	6.90103	5.14906
	4.39064	9.18327	6.96695	5.10492
	4.42833	9.21199	7.06237	5.10243
	4.4619	9.2229	7.07597	5.1507
	4.46106	9.22362	6.98574	5.17481
	4.44379	9.21506	6.89862	5.14916
	4.42251	9.18136	6.82605	5.14891
	4.39852	9.14863	6.71234	5.182
	4.39259	9.14963	6.60482	5.18558
	4.3946	9.16106	6.57046	5.16163
	4.36687	9.15626	6.55845	5.15282
	4.3367	9.14702	6.57197	5.13376
	4.35272	9.13671	6.64868	5.08439
	4.397	9.11172	6.72759	5.03681
	4.41977	9.09437	6.7259	4.98484
	4.41314	9.09024	6.70624	4.92226
	4.38527	9.07099	6.73693	4.9014
	4.34885	9.04131	6.74641	4.94662
	4.33755	9.04308	6.70521	4.98568
	4.3567	9.07293	6.65165	5.00401
	4.36362	9.09552	6.58727	5.04869
	4.33186	9.11037	6.50813	5.10944
	4.28987	9.12146	6.48635	5.15171
	4.26961	9.11292	6.53159	5.18687
	4.26412	9.08495	6.5401	5.20571
	4.26656	9.05466	6.51621	5.1456
	4.27444	9.01487	6.54107	5.04445
	4.26613	8.96335	6.62186	4.99754
	4.23922	8.94262	6.67728	5.02082
	4.23279	8.97536	6.70792	5.05966
	4.24827	9.02643	6.70934	5.08795
	4.19303	9.05991	6.64852	5.09155
	4.20505	9.07059	6.59496	5.04942
	4.21805	9.05858	6.64605	5.0034
	4.21203	9.01672	6.76153	4.99117
	4.1962	8.98397	6.80963	4.97409
	4.20068	8.96856	6.79883	4.92118
	4.21468	8.93809	6.77185	4.89564
	4.21837	8.91562	6.73125	4.94327
	4.22562	8.91357	6.72009	5.01625
	4.25623	8.91619	6.77592	5.0905
	4.28654	8.8984	6.81063	5.1658
	4.29211	8.87051	6.734	5.21219
	4.28274	8.84346	6.64726	5.20692
	4.26391	8.81138	6.63133	5.20039
	4.24005	8.78335	6.63211	5.20553
	4.23627	8.77625	6.6107	5.17963
	4.25741	8.76873	6.58264	5.14207
	4.25701	8.74203	6.52964	5.13432
	4.23207	8.72093	6.4691	5.13424
	4.22567	8.72216	6.50845	5.10211
	4.23765	8.73019	6.60318	5.0667
	4.24217	8.74734	6.61254	5.03717
	4.24148	8.78605	6.52374	5.00426
	4.2351	8.80092	6.43396	5.01598
	4.20273	8.76418	6.32591	5.10367
	4.1649	8.71217	6.19335	5.17949
	4.15286	8.67409	6.13955	5.14767
	4.15413	8.64365	6.16468	5.03893
	4.15252	8.63745	6.18449	4.91231
	4.1669	8.66783	6.20328	4.80274
	4.20163	8.70066	6.26612	4.75381
	4.214	8.71765	6.29195	4.76561
	4.19177	8.73297	6.25517	4.767
	4.15612	8.73636	6.23047	4.74036
	4.11197	8.7029	6.21324	4.75908
	4.06892	8.66294	6.16857	4.82191
	4.05986	8.65083	6.15943	4.8717
	4.07542	8.64806	6.22255	4.90287
	4.06645	8.63719	6.26042	4.93972
	4.03741	8.6334	6.26107	4.9618
	4.01924	8.63277	6.29256	4.97838
	4.01286	8.62465	6.31146	5.01604
	3.95554	8.63868	6.24968	5.00998
	3.95784	8.67658	6.17961	4.90675
	3.98686	8.70104	6.18888	4.77779
	4.0097	8.68933	6.22517	4.71763
	4.02526	8.67056	6.27814	4.71684
	4.04367	8.65557	6.35288	4.75595
	4.04377	8.64196	6.38588	4.81827
	3.99982	8.65093	6.3332	4.84616
	3.93604	8.67613	6.27753	4.82456
	3.88287	8.68659	6.25241	4.81896
	3.84453	8.68317	6.18485	4.85785
	3.8322	8.69114	6.11416	4.88749
	3.84651	8.69144	6.12095	4.91393
	3.84714	8.64954	6.18848	4.98131
	3.81615	8.5898	6.25147	5.05882
	3.79595	8.54306	6.32017	5.08752
	3.79569	8.51545	6.36231	5.06444
	3.79653	8.51405	6.31802	5.00361
	3.81242	8.54609	6.25603	4.90451
	3.85606	8.57007	6.26683	4.83558
	3.90431	8.55757	6.31889	4.84517
	3.93819	8.53879	6.34012	4.86937
	3.96127	8.52306	6.36864	4.82709
	3.95562	8.47376	6.39597	4.73836
	3.91277	8.44281	6.34122	4.64737
	3.86124	8.44038	6.2401	4.56888
	3.8253	8.44605	6.18131	4.55679
	3.79362	8.44093	6.15826	4.63183
	3.7679	8.443	6.12827	4.72505
	3.76659	8.44975	6.15231	4.7743
	3.76994	8.43917	6.19327	4.81362
	3.75938	8.42092	6.16665	4.85268
	3.76226	8.41993	6.11559	4.84204
	3.79108	8.42125	6.11254	4.78951
	3.80522	8.40713	6.09811	4.7288
	3.79182	8.39017	6.03096	4.6562
	3.76676	8.37756	5.98994	4.58627
	3.72255	8.35996	5.96324	4.56359
	3.67574	8.35514	5.89567	4.54654
	3.66651	8.37789	5.81999	4.47011
	3.68733	8.39337	5.78845	4.38313
	3.69466	8.38589	5.75883	4.35147
	3.69761	8.37529	5.74253	4.35355
	3.6767	8.36459	5.82188	4.35457
	3.69859	8.34472	5.93941	4.38336
	3.72797	8.33921	5.9814	4.41965
	3.76321	8.36444	5.9544	4.41378
	3.79756	8.38765	5.92414	4.36996
	3.81602	8.39423	5.88985	4.30572
	3.83692	8.39765	5.88594	4.21764
	3.86995	8.38653	5.95666	4.15064
	3.88076	8.34201	6.01482	4.1664
	3.85135	8.29029	6.02188	4.2142
	3.81418	8.26184	6.06065	4.23147
	3.78331	8.25019	6.16997	4.23909
	3.7494	8.26071	6.23343	4.25854
	3.73376	8.30153	6.21499	4.2512
	3.74541	8.33751	6.15813	4.21603
	3.75885	8.32852	6.07332	4.18461
	3.76429	8.29861	5.98939	4.13116
	3.78026	8.27211	5.97791	4.03942
	3.80119	8.2375	6.03195	3.94744
	3.79704	8.19923	6.03495	3.87763
	3.77043	8.17778	5.99293	3.81489
	3.7439	8.1715	5.97902	3.79886
	3.72519	8.17477	5.98305	3.87192
	3.70946	8.19811	5.95047	3.98101
	3.70587	8.22277	5.8934	4.07375
	3.70453	8.2238	5.8172	4.15823
	3.69107	8.21924	5.70011	4.2343
	3.69627	8.235	5.62939	4.25623
	3.74029	8.24625	5.65821	4.23247
	3.78178	8.22425	5.69778	4.19265
	3.78514	8.19031	5.65954	4.13081
	3.76815	8.16278	5.60172	4.05416
	3.73092	8.14108	5.58609	4.00145
	3.67159	8.13781	5.57416	3.98102
	3.62826	8.16001	5.56897	3.96175
	3.62215	8.17503	5.55877	3.96664
	3.63265	8.16149	5.48558	4.01423
	3.64432	8.14353	5.34489	4.06246
	3.65511	8.1246	5.2683	4.08715
	3.64205	8.09637	5.28234	4.13272
	3.60578	8.08159	5.30193	4.20244
	3.57945	8.10621	5.34436	4.23506
	3.55457	8.14913	5.45044	4.23534
	3.52791	8.1893	5.54088	4.22552
	3.52454	8.23229	5.53998	4.17585
	3.58454	8.26252	5.50506	4.0825
	3.66039	8.25327	5.42617	4.00607
	3.69426	8.22332	5.29007	3.95552
	3.69748	8.20925	5.21626	3.89626
	3.69461	8.20886	5.28009	3.87122
	3.67884	8.21948	5.39794	3.91068
	3.67039	8.24881	5.49877	3.96603
	3.68785	8.26766	5.60493	3.99927
	3.68964	8.24249	5.65671	4.03489
	3.65833	8.21166	5.61242	4.04784
	3.62503	8.20312	5.55225	4.01289
	3.6077	8.2422	5.5174	3.98934
	3.59931	8.29569	5.45294	4.00052
	3.61147	8.35008	5.39068	3.9908
	3.63957	8.40032	5.43799	3.94668
	3.64411	8.40348	5.52205	3.92012
	3.61845	8.38179	5.5552	3.90666
	3.59598	8.35403	5.58041	3.89428
	3.59109	8.30883	5.63761	3.90821
	3.59047	8.26579	5.66105	3.92364
	3.60841	8.24872	5.65819	3.8839
	3.64559	8.24298	5.65448	3.82467
	3.65673	8.22828	5.56684	3.82198
	3.62797	8.22595	5.40105	3.84436
	3.59595	8.24229	5.29216	3.82705
	3.57348	8.24345	5.31899	3.76294
	3.53739	8.22632	5.41984	3.6649
	3.50081	8.21306	5.54093	3.55634
	3.48355	8.20047	5.60766	3.51159
	3.49086	8.17816	5.53666	3.56928
	3.52624	8.16776	5.39582	3.64691
	3.57554	8.1664	5.35139	3.68424
	3.59152	8.14543	5.43143	3.69979
	3.55355	8.12021	5.49165	3.70203
	3.50893	8.11316	5.47431	3.65731
	3.49868	8.10337	5.41875	3.57706
	3.51162	8.0747	5.34431	3.49212
	3.52807	8.04597	5.28774	3.41354
	3.55646	8.0228	5.29306	3.39942
	3.58383	8.00328	5.31507	3.49962
	3.60036	8.00616	5.26112	3.65537
	3.6109	8.03321	5.20866	3.74118
	3.62284	8.05091	5.2456	3.73637
	3.61404	8.03925	5.33631	3.70744
	3.59551	8.02624	5.40614	3.69809
	3.60267	8.02033	5.46773	3.72145
	3.61773	8.00817	5.52248	3.76659
	3.61834	7.9973	5.54099	3.7841
	3.62585	8.0027	5.57412	3.73357
	3.64091	8.0089	5.62793	3.67797
	3.64568	8.00986	5.61547	3.68018
	3.65199	8.02613	5.53382	3.70295
	3.67189	8.03258	5.55136	3.70007
	3.67326	8.04448	5.71674	3.68423
	3.64786	8.05224	5.88972	3.66432
	3.62568	8.07413	5.98106	3.62445
	3.61136	8.09652	5.95103	3.61138
	3.58263	8.11151	5.7854	3.64351
	3.55152	8.131	5.59734	3.67097
	3.55245	8.14559	5.54613	3.67743
	3.57408	8.14027	5.56216	3.70445
	3.5973	8.1313	5.50214	3.73166
	3.62067	8.12898	5.41024	3.69525
	3.61975	8.10696	5.36169	3.61572
	3.57449	8.06171	5.34689	3.53599
	3.53076	8.03002	5.34981	3.47467
	3.53663	8.01384	5.37832	3.46458
	3.56797	7.99299	5.34672	3.52838
	3.60222	7.97776	5.26301	3.5857
	3.64018	7.98138	5.26308	3.57026
	3.66428	7.97931	5.36289	3.54967
	3.66282	7.97292	5.39399	3.58786
	3.67011	7.98091	5.30054	3.65643
	3.70741	7.98397	5.21351	3.71972
	3.7427	7.9669	5.2047	3.76656
	3.75746	7.96168	5.2982	3.75088
	3.76476	7.98134	5.47876	3.6776
	3.7735	7.99818	5.6113	3.62811
	3.77575	8.01104	5.56842	3.60566
	3.78919	8.03142	5.46739	3.54331
	3.81717	8.04293	5.48021	3.4462
	3.80261	8.0375	5.55756	3.38538
	3.80193	8.04755	5.59862	3.36812
	3.80542	8.07858	5.56918	3.38484
	3.81373	8.10062	5.46588	3.43328
	3.7915	8.11612	5.33846	3.45847
	3.75175	8.13364	5.32468	3.40728
	3.71697	8.12897	5.44934	3.34265
	3.68701	8.09918	5.54184	3.35017
	3.68006	8.08348	5.51812	3.3902
	3.70662	8.08383	5.45639	3.4079
	3.73194	8.07448	5.44603	3.39769
	3.71138	8.07103	5.46238	3.36312
	3.67389	8.08508	5.50483	3.32231
	3.65406	8.08767	5.54927	3.32723
	3.64834	8.05466	5.54781	3.36411
	3.64921	8.02226	5.53996	3.3409
	3.6596	7.99347	5.59013	3.26711
	3.65897	7.96037	5.62389	3.24626
	3.6378	7.93744	5.52258	3.31867
	3.64093	7.92566	5.37993	3.42427
	3.67758	7.90333	5.34851	3.51619
	3.70198	7.87146	5.45634	3.58032
	3.7005	7.86485	5.62998	3.60047
	3.68994	7.88789	5.76306	3.60792
	3.64933	7.92091	5.74226	3.63916
	3.58223	7.96478	5.56518	3.66321
	3.54231	8.01467	5.42501	3.61974
	3.5441	8.03627	5.42875	3.53689
	3.57095	8.02199	5.47167	3.45318
	3.62311	8.00037	5.45034	3.36395
	3.68721	7.96609	5.41563	3.30665
	3.71387	7.91443	5.41277	3.33333
	3.69448	7.88112	5.42866	3.40699
	3.65916	7.88701	5.49606	3.44543
	3.61946	7.9068	5.54573	3.452
	3.57476	7.9182	5.47219	3.4426
	3.54591	7.92559	5.33592	3.40812
	3.54668	7.91107	5.32278	3.38326
	3.54139	7.8705	5.42458	3.41046
	3.51867	7.84446	5.51249	3.44481
	3.51127	7.85975	5.53801	3.41919
	3.52272	7.88558	5.49299	3.35178
	3.48377	7.90318	5.41177	3.26258
	3.52507	7.92078	5.40135	3.1544
	3.57534	7.91675	5.50862	3.07528
	3.59612	7.8782	5.56516	3.06448
	3.5969	7.84414	5.47189	3.06233
	3.60583	7.83847	5.38358	3.0075
	3.6139	7.84298	5.44001	2.93871
	3.60768	7.8601	5.57706	2.88301
	3.61491	7.8973	5.66319	2.83626
	3.6517	7.925	5.61946	2.81976
	3.69052	7.92775	5.40361	2.84544
	3.7181	7.93075	5.17833	2.84502
	3.73982	7.93682	5.17821	2.78382
	3.74473	7.9204	5.36849	2.71835
	3.72106	7.89978	5.52317	2.6765
	3.70009	7.91051	5.55431	2.64505
	3.70953	7.92244	5.53118	2.64038
	3.72287	7.91651	5.49327	2.68398
	3.72497	7.91675	5.50631	2.72632
	3.73031	7.92792	5.57263	2.74263
	3.73183	7.92521	5.58453	2.75964
	3.71601	7.91068	5.46875	2.77432
	3.71106	7.90439	5.35735	2.76893
	3.71979	7.88397	5.38845	2.77092
	3.70501	7.85028	5.50171	2.78902
	3.6724	7.83772	5.59382	2.75672
	3.65785	7.84607	5.63693	2.67601
	3.66273	7.86034	5.63934	2.6231
	3.67056	7.89994	5.61582	2.60448
	3.69374	7.95815	5.65173	2.59894
	3.72314	7.98996	5.72833	2.60793
	3.73275	7.98307	5.6991	2.62624
	3.73539	7.96671	5.57351	2.60145
	3.76085	7.94618	5.50826	2.56179
	3.79029	7.91821	5.55241	2.57841
	3.79534	7.90877	5.60892	2.64303
	3.79591	7.92776	5.64665	2.69373
	3.79673	7.95365	5.64165	2.73198
	3.78325	7.97124	5.57026	2.78176
	3.7783	7.99089	5.51852	2.81876
	3.80072	7.99982	5.55796	2.83781
	3.81343	7.98366	5.5968	2.84267
	3.80196	7.96823	5.50444	2.80343
	3.80036	7.95348	5.37657	2.71211
	3.79892	7.92585	5.33669	2.64365
	3.77535	7.87608	5.37655	2.61784
	3.75155	7.84571	5.43272	2.56904
	3.75043	7.83872	5.47047	2.50556
	3.75234	7.84607	5.42099	2.50047
	3.75298	7.87199	5.31031	2.5674
	3.76347	7.9028	5.3109	2.66749
	3.71793	7.90798	5.40787	2.77699
	3.70263	7.90062	5.41273	2.82931
	3.67243	7.90806	5.29226	2.77271
	3.65365	7.90926	5.17442	2.67837
	3.63763	7.87561	5.1187	2.63283
	3.63926	7.84954	5.15633	2.61098
	3.68361	7.85037	5.303	2.55577
	3.74023	7.85385	5.40664	2.49666
	3.76479	7.86621	5.34047	2.45496
	3.76386	7.90066	5.19771	2.43106
	3.74736	7.92711	5.14732	2.45568
	3.69829	7.92864	5.18149	2.52698
	3.64302	7.9292	5.22321	2.55804
	3.61458	7.93102	5.24692	2.5112
	3.59948	7.9081	5.21129	2.46359
	3.58378	7.87562	5.13638	2.45006
	3.58204	7.85788	5.13219	2.44159
	3.59464	7.83411	5.22086	2.43126
	3.60259	7.80311	5.22671	2.42127
	3.62229	7.82942	5.10282	2.38363
	3.66672	7.87725	4.97684	2.34536
	3.69988	7.90814	4.92721	2.35905
	3.68274	7.92882	4.93956	2.3784
	3.64025	7.94389	4.99613	2.34026
	3.61753	7.92927	5.03973	2.28503
	3.61973	7.88495	4.99907	2.2868
	3.6478	7.84878	4.95813	2.34006
	3.69315	7.83903	5.00651	2.4124
	3.71376	7.85024	5.07842	2.47498
	3.68175	7.89074	5.04962	2.47865
	3.62768	7.94488	4.92254	2.44425
	3.56925	7.97197	4.78755	2.46505
	3.50206	7.96637	4.68347	2.56623
	3.45237	7.95129	4.64433	2.63847
	3.44061	7.92285	4.6514	2.62413
	3.45413	7.87622	4.61332	2.56756
	3.46979	7.85081	4.47398	2.51002
	3.51081	7.86081	4.3537	2.46629
	3.57085	7.87891	4.36774	2.44739
	3.60813	7.89325	4.46635	2.4263
	3.61124	7.91139	4.60297	2.34515
	3.59379	7.9189	4.74265	2.24602
	3.53619	7.90184	4.81827	2.21308
	3.49131	7.87936	4.80611	2.2448
	3.43567	7.86336	4.81284	2.28296
	3.43621	7.85373	4.84008	2.32062
	3.41534	7.86106	4.77426	2.36754
	3.39415	7.90048	4.61791	2.40604
	3.40106	7.94796	4.48863	2.4588
	3.4157	7.9685	4.43229	2.53526
	3.43081	7.97185	4.41324	2.57764
	3.46361	7.96545	4.45654	2.55493
	3.48672	7.93809	4.52948	2.53605
	3.48559	7.90572	4.54151	2.56659
	3.48798	7.89588	4.526	2.60996
	3.50598	7.89197	4.56558	2.66145
	3.5172	7.87572	4.58955	2.7221
	3.52707	7.86761	4.51727	2.74706
	3.50213	7.87251	4.44956	2.71448
	3.54843	7.87026	4.41894	2.68388
	3.57187	7.86413	4.38531	2.6636
	3.56234	7.86802	4.38486	2.60575
	3.53189	7.85659	4.42638	2.53369
	3.48449	7.82791	4.41496	2.50204
	3.4527	7.82464	4.36692	2.50625
	3.46957	7.85451	4.41364	2.52435
	3.50528	7.881	4.50582	2.56637
	3.5222	7.90081	4.52378	2.58176
	3.53345	7.92633	4.46656	2.52433
	3.5536	7.925	4.41758	2.45913
	3.56301	7.88583	4.3842	2.45621
	3.57632	7.8381	4.3897	2.48058
	3.60731	7.79084	4.46233	2.48853
	3.6226	7.74283	4.50628	2.49579
	3.6081	7.73434	4.45869	2.49252
	3.59494	7.77673	4.41614	2.48387
	3.59589	7.82196	4.44431	2.52557
	3.58809	7.83989	4.44464	2.61475
	3.58046	7.83715	4.39962	2.66521
	3.5908	7.81136	4.37549	2.66212
	3.60518	7.76303	4.34139	2.68251
	3.60958	7.72402	4.30202	2.7257
	3.62246	7.70661	4.3506	2.74097
	3.64797	7.69461	4.49309	2.71581
	3.66901	7.6984	4.61644	2.65725
	3.70244	7.73577	4.71436	2.56485
	3.73858	7.77606	4.81068	2.50418
	3.78767	7.7765	4.8702	2.52256
	3.79466	7.75442	4.88627	2.54786
	3.80012	7.7292	4.90299	2.53453
	3.80409	7.70575	4.91457	2.54598
	3.77579	7.69983	4.8405	2.6299
	3.7365	7.72113	4.71398	2.73294
	3.71259	7.74646	4.62104	2.80578
	3.69492	7.75699	4.58277	2.80712
	3.67875	7.78067	4.57653	2.69972
	3.67558	7.81558	4.63255	2.53755
	3.66404	7.82928	4.72115	2.43443
	3.62681	7.81306	4.75222	2.43191
	3.59685	7.78494	4.75292	2.47443
	3.57846	7.74809	4.76173	2.53291
	3.59126	7.71844	4.7278	2.60256
	3.61102	7.72512	4.62726	2.65586
	3.62928	7.75458	4.54377	2.68813
	3.62958	7.76855	4.48773	2.71858
	3.6065	7.767	4.40371	2.77522
	3.59825	7.77904	4.33551	2.77709
	3.61562	7.79876	4.33267	2.74821
	3.61955	7.80299	4.35843	2.72678
	3.60114	7.79139	4.35605	2.68884
	3.58424	7.75784	4.37629	2.61284
	3.56136	7.70662	4.41963	2.53841
	3.53458	7.6767	4.42136	2.48051
	3.52534	7.69565	4.40926	2.42406
	3.52488	7.72359	4.43054	2.41048
	3.50589	7.72332	4.43329	2.4586
	3.4772	7.70974	4.39977	2.51058
	3.45907	7.69317	4.43225	2.52013
	3.39805	7.67029	4.50716	2.52094
	3.38537	7.65764	4.54896	2.52849
	3.40123	7.66631	4.58719	2.52213
	3.44011	7.66574	4.6434	2.51429
	3.47	7.64894	4.63886	2.50236
	3.48929	7.64826	4.58407	2.44592
	3.51234	7.66587	4.5797	2.35903
	3.52489	7.67018	4.57983	2.32048
	3.52622	7.66185	4.52174	2.31969
	3.53934	7.65246	4.4602	2.29046
	3.56175	7.62631	4.44234	2.24783
	3.5636	7.59414	4.41072	2.23234
	3.57489	7.58702	4.35354	2.24717
	3.60308	7.58905	4.33088	2.30611
	3.61632	7.57615	4.30213	2.42316
	3.59143	7.56122	4.23629	2.51915
	3.55528	7.56394	4.18863	2.54251
	3.53439	7.56289	4.17129	2.55266
	3.52864	7.5699	4.10698	2.59868
	3.54691	7.60914	4.05562	2.64412
	3.58709	7.65397	4.11657	2.67196
	3.61462	7.65934	4.22047	2.70196
	3.61383	7.62382	4.28674	2.708
	3.61286	7.59767	4.32498	2.68883
	3.61541	7.57311	4.33833	2.69751
	3.58579	7.57202	4.28947	2.74393
	3.54928	7.60794	4.25569	2.77234
	3.52319	7.6435	4.29339	2.77696
	3.50129	7.63876	4.34106	2.77872
	3.48901	7.61305	4.36861	2.74701
	3.51436	7.57902	4.42567	2.69857
	3.55271	7.53808	4.51579	2.69552
	3.55611	7.51664	4.56538	2.71475
	3.53812	7.52844	4.60113	2.66839
	3.51917	7.54315	4.65617	2.56918
	3.49174	7.54026	4.65796	2.48681
	3.46797	7.54536	4.57191	2.43244
	3.47774	7.55818	4.49997	2.41157
	3.50405	7.55317	4.49939	2.43548
	3.52619	7.53224	4.51134	2.47885
	3.56299	7.50413	4.54196	2.50141
	3.60989	7.4613	4.57705	2.54179
	3.62838	7.41175	4.55888	2.63138
	3.6161	7.38763	4.5165	2.72356
	3.60521	7.38693	4.56649	2.77319
	3.58679	7.3891	4.68292	2.78505
	3.55053	7.37581	4.73659	2.75934
	3.5188	7.39422	4.72804	2.69546
	3.49212	7.40897	4.69719	2.6569
[truncated: 5,501 more rows]

## Sheet: panel_E_SCH
	0.28365	0.107652	0.36585	-0.528525
	0.226544	0.0952135	0.310001	-0.528496
	0.150582	0.067354	0.236191	-0.557348
	0.103064	0.052378	0.176064	-0.548535
	0.10301	0.046176	0.163666	-0.570796
	0.139585	0.0415802	0.201148	-0.638439
	0.170326	0.0695525	0.273677	-0.664948
	0.151202	0.14672	0.347744	-0.672074
	0.111674	0.244709	0.396761	-0.740746
	0.111018	0.314609	0.397579	-0.782524
	0.154748	0.33365	0.33566	-0.714726
	0.187393	0.281077	0.213865	-0.621508
	0.175238	0.156707	0.0787836	-0.556593
	0.133737	0.0331804	-0.0141388	-0.466798
	0.0831474	-0.0184854	-0.0498053	-0.390789
	0.0384909	-0.00433704	-0.0440798	-0.382991
	0.0112053	0.0280034	-0.0277599	-0.357785
	-0.0152073	0.074531	-0.0189045	-0.279136
	-0.0511825	0.0898712	-0.0255879	-0.245443
	-0.0614778	0.0429673	-0.0258099	-0.265969
	-0.0234735	-0.00528805	-0.000784918	-0.256725
	0.0231053	-0.00312619	0.0320783	-0.240382
	0.0507432	0.0279828	0.033505	-0.254606
	0.0548114	0.0765846	-0.00439428	-0.220505
	0.03169	0.151369	-0.0512628	-0.125607
	0.00638395	0.205051	-0.0681874	-0.105631
	0.0276245	0.212819	-0.0342936	-0.197051
	0.0886285	0.197469	0.015173	-0.291478
	0.139613	0.161458	0.0167904	-0.349501
	0.163387	0.0899594	-0.0300926	-0.386767
	0.170281	0.0110677	-0.0619791	-0.345558
	0.179806	-0.0273535	-0.0455246	-0.248456
	0.20114	-0.0233217	-0.0142109	-0.218131
	0.228228	-0.00215038	-0.00669113	-0.245324
	0.221709	0.0394256	-0.0341636	-0.218013
	0.161373	0.0911104	-0.0561162	-0.164916
	0.0908611	0.10469	-0.0138941	-0.140753
	0.0704512	0.0945048	0.10284	-0.0920069
	0.098755	0.116059	0.22452	-0.0131206
	0.142726	0.151329	0.274632	0.0208252
	0.182718	0.183329	0.24402	0.0571346
	0.196241	0.225676	0.154819	0.175492
	0.179693	0.251178	0.0421145	0.292676
	0.168707	0.21371	-0.0674852	0.323799
	0.17398	0.151276	-0.146315	0.320176
	0.168436	0.090931	-0.193715	0.305339
	0.143106	0.014271	-0.197773	0.245732
	0.126714	-0.0628829	-0.139698	0.20822
	0.128269	-0.0926342	-0.032968	0.254588
	0.138442	-0.0641539	0.0701925	0.301282
	0.150824	-0.0137882	0.119031	0.296911
	0.163665	0.0335406	0.105552	0.323493
	0.167624	0.0541012	0.0476779	0.36201
	0.157193	0.0327083	-0.0167255	0.288842
	0.146837	-0.0174886	-0.0555508	0.156942
	0.142577	-0.0402739	-0.0712727	0.0424074
	0.138457	-0.0109216	-0.0815462	-0.0836343
	0.131604	0.0486124	-0.105509	-0.203957
	0.127075	0.109499	-0.149078	-0.223833
	0.115245	0.190116	-0.21691	-0.160144
	0.105758	0.196896	-0.295206	-0.100017
	0.106661	0.121205	-0.35937	-0.0170794
	0.0920085	0.0262081	-0.386392	0.100471
	0.0506263	-0.0558831	-0.364452	0.170729
	0.0211578	-0.112984	-0.308885	0.197001
	0.0419236	-0.118882	-0.254608	0.260003
	0.100217	-0.0864688	-0.24524	0.318603
	0.147497	-0.0397363	-0.269511	0.291997
	0.144811	-0.00846278	-0.263259	0.254557
	0.0866873	-0.00804471	-0.184782	0.270891
	0.00967615	-0.0523258	-0.0824605	0.253466
	-0.042237	-0.129376	-0.034939	0.192233
	-0.0474584	-0.197866	-0.0800116	0.190976
	-0.0352248	-0.227043	-0.183601	0.238234
	-0.0317984	-0.226968	-0.264615	0.261054
	-0.0275367	-0.21395	-0.272492	0.282294
	-0.00920462	-0.160237	-0.228711	0.295798
	0.0197945	-0.0859218	-0.200765	0.239676
	0.0557914	-0.0411372	-0.227049	0.189829
	0.0854521	-0.0261289	-0.282996	0.246158
	0.0890932	-0.039149	-0.306381	0.306584
	0.0859532	-0.078926	-0.251745	0.251811
	0.0833653	-0.0956154	-0.153826	0.169318
	0.0527507	-0.0488794	-0.0884468	0.153535
	-0.016786	0.0077167	-0.0868886	0.186125
	-0.0796947	0.018601	-0.0946021	0.262943
	-0.0972169	0.00558007	-0.0627706	0.376565
	-0.0676215	0.0054808	-0.0146133	0.390021
	-0.0134005	0.0206826	-0.0118621	0.266189
	0.022194	0.0439654	-0.0900838	0.187687
	0.00580347	0.0784456	-0.214339	0.257293
	-0.0402027	0.0905573	-0.303003	0.377158
	-0.0589567	0.0636813	-0.288726	0.468131
	-0.034425	0.0371442	-0.20656	0.492248
	-0.00320007	0.0357244	-0.14819	0.366581
	0.0104072	0.019032	-0.159038	0.143538
	0.00219927	-0.00486276	-0.186329	0.0160189
	-0.0249522	0.00158156	-0.155458	0.0113999
	-0.0514172	0.0153866	-0.0496516	0.0100171
	-0.0487813	0.0273046	0.0754435	0.000779055
	-0.0423624	0.0764682	0.137379	0.028039
	-0.0665353	0.138247	0.126455	0.0421565
	-0.111948	0.164738	0.112336	0.0224213
	-0.155954	0.133436	0.15239	0.0310533
	-0.185234	0.122365	0.22108	0.0294291
	-0.187402	0.0885813	0.25784	-0.0476199
	-0.160115	0.0283963	0.251665	-0.105622
	-0.139365	-0.0321572	0.229851	-0.0491623
	-0.136131	-0.081971	0.235097	0.0268257
	-0.146482	-0.124651	0.267759	0.0488436
	-0.152414	-0.142192	0.285795	0.0638872
	-0.163186	-0.146491	0.244893	0.0726993
	-0.190648	-0.17957	0.167075	0.0437481
	-0.219437	-0.229864	0.124347	0.0333134
	-0.226503	-0.230131	0.156583	0.0211781
	-0.204147	-0.176109	0.230839	-0.0859568
	-0.155565	-0.138857	0.253075	-0.200168
	-0.112706	-0.126859	0.182935	-0.146166
	-0.113959	-0.135715	0.0622185	0.0240529
	-0.145364	-0.161402	-0.0237393	0.13844
	-0.153567	-0.156213	-0.0306337	0.167794
	-0.127955	-0.0880792	0.0049152	0.156043
	-0.0887672	-0.0216854	0.015807	0.1126
	-0.0521443	-0.0179073	-0.00485537	0.0879474
	-0.025788	-0.0571536	-0.00469365	0.119984
	-0.0193508	-0.129461	0.0340758	0.101753
	-0.0237547	-0.21123	0.0799765	-0.0441888
	-0.0362091	-0.26006	0.101343	-0.19118
	-0.0662719	-0.258437	0.0964153	-0.210568
	-0.109049	-0.242394	0.0899422	-0.129074
	-0.141939	-0.246612	0.105448	0.0199498
	-0.149553	-0.254975	0.134566	0.197996
	-0.154118	-0.253643	0.132559	0.282314
	-0.175296	-0.241988	0.0875835	0.232997
	-0.213964	-0.208513	0.028098	0.197852
	-0.258563	-0.138795	-0.00855582	0.22646
	-0.282443	-0.0701557	-0.0134912	0.213559
	-0.261409	-0.0288713	-0.0056556	0.150716
	-0.224702	-0.000135696	-0.0317847	0.126225
	-0.220243	-0.00417926	-0.117889	0.125021
	-0.237997	-0.0534058	-0.192557	0.116632
	-0.242113	-0.100307	-0.166425	0.147828
	-0.229166	-0.084145	-0.036306	0.182473
	-0.206275	-0.0167167	0.110637	0.119699
	-0.189637	0.067763	0.189429	0.0232517
	-0.203003	0.114856	0.167554	0.0157704
	-0.241191	0.101774	0.0979575	0.04138
	-0.258474	0.0516595	0.0615638	0.00955864
	-0.244014	0.0178586	0.0651409	-0.0327934
	-0.219294	0.0189921	0.0426685	-0.0658048
	-0.200213	0.00311502	-0.0397148	-0.106795
	-0.179248	-0.0578965	-0.131302	-0.0627666
	-0.154257	-0.106031	-0.16185	0.0965717
	-0.136111	-0.0932369	-0.111375	0.187029
	-0.132849	-0.0594983	-0.0300757	0.0958956
	-0.154333	-0.0300478	0.00809711	-0.0566958
	-0.201697	-0.011954	-0.0110739	-0.175455
	-0.246419	-0.0365952	-0.0323372	-0.241003
	-0.247807	-0.0682034	0.00238468	-0.209656
	-0.216493	-0.0357445	0.0699157	-0.113522
	-0.191066	0.0365733	0.105128	-0.0850618
	-0.193438	0.0618987	0.065227	-0.0912939
	-0.223982	0.0335617	-0.0279818	0.0304834
	-0.265674	-0.00766408	-0.109398	0.257496
	-0.280564	-0.0472396	-0.128456	0.41367
	-0.250081	-0.0776031	-0.0921349	0.451524
	-0.20061	-0.0973082	-0.0722866	0.396988
	-0.169193	-0.099052	-0.113874	0.25256
	-0.161808	-0.0721991	-0.195689	0.0967567
	-0.165786	0.011337	-0.243117	0.0109981
	-0.180238	0.123206	-0.216232	-0.0883338
	-0.22364	0.177369	-0.1512	-0.243234
	-0.2857	0.137462	-0.109835	-0.300964
	-0.344227	0.0586081	-0.108394	-0.199729
	-0.370629	-0.0199578	-0.104166	-0.107683
	-0.342059	-0.104292	-0.0592011	-0.12076
	-0.278397	-0.153401	0.017032	-0.174041
	-0.246409	-0.14379	0.0674621	-0.235991
	-0.270546	-0.0931996	0.0515313	-0.276431
	-0.307316	0.0116936	-0.00192825	-0.223234
	-0.317488	0.156539	-0.0272823	-0.12101
	-0.287185	0.248672	0.00919951	-0.109783
	-0.229276	0.241608	0.0728312	-0.161214
	-0.191994	0.198906	0.109503	-0.155501
	-0.221184	0.156403	0.0846892	-0.115226
	-0.289236	0.120238	0.0279864	-0.106461
	-0.3313	0.117649	0.0016912	-0.0981331
	-0.322039	0.15876	0.0224881	-0.116154
	-0.286127	0.222292	0.037628	-0.208192
	-0.263635	0.261374	-0.00431717	-0.256371
	-0.275197	0.276569	-0.0853962	-0.148917
	-0.298666	0.260356	-0.141536	-0.0184313
	-0.284095	0.205629	-0.108406	-0.00238822
	-0.223188	0.148646	-0.0056718	-0.0428796
	-0.178958	0.117852	0.0759409	-0.0746397
	-0.196625	0.0731679	0.0817474	-0.11238
	-0.258208	0.0176056	0.0679949	-0.122824
	-0.320005	0.0198163	0.100106	-0.0993775
	-0.357792	0.0721603	0.153498	-0.113591
	-0.352203	0.12456	0.154271	-0.136938
	-0.325773	0.180836	0.0658615	-0.0429145
	-0.312289	0.238922	-0.0671755	0.132592
	-0.299842	0.268947	-0.151504	0.2382
	-0.264737	0.27488	-0.139334	0.260047
	-0.227128	0.260456	-0.101079	0.241461
	-0.215752	0.204322	-0.124985	0.141342
	-0.223257	0.12756	-0.18036	-0.0150943
	-0.23598	0.0837853	-0.184297	-0.108416
	-0.24028	0.090786	-0.108031	-0.162496
	-0.225854	0.105873	-0.00634828	-0.263518
	-0.200451	0.0954004	0.0400775	-0.356488
	-0.19794	0.0674793	-0.0237206	-0.381723
	-0.22927	0.0231529	-0.159403	-0.419208
	-0.261822	-0.0362201	-0.263566	-0.476644
	-0.267367	-0.0555949	-0.285021	-0.462573
	-0.252396	-0.00780404	-0.256365	-0.367768
	-0.231864	0.0462877	-0.238653	-0.225976
	-0.218514	0.0771995	-0.249358	-0.00364844
	-0.224266	0.0887429	-0.271316	0.224113
	-0.245041	0.0652073	-0.250463	0.276095
	-0.253599	0.00200517	-0.161767	0.163035
	-0.253339	-0.0635241	-0.0529626	0.0745838
	-0.260836	-0.122562	-0.000961366	0.0540634
	-0.281652	-0.171426	-0.0177302	0.0362136
	-0.304217	-0.181657	-0.0448177	0.00330311
	-0.323368	-0.154971	-0.0345133	-0.0541901
	-0.329821	-0.124711	0.0104147	-0.155705
	-0.316508	-0.118775	0.0354384	-0.177158
	-0.293483	-0.126854	-0.0119393	0.000884878
	-0.286666	-0.135305	-0.118939	0.234904
	-0.30304	-0.140696	-0.212443	0.317812
	-0.307786	-0.12321	-0.222271	0.252396
	-0.281965	-0.0760217	-0.170984	0.115857
	-0.243285	-0.0421555	-0.142432	-0.0585841
	-0.217784	-0.0661886	-0.192856	-0.166965
	-0.220553	-0.109783	-0.281728	-0.153524
	-0.255136	-0.12811	-0.330789	-0.124225
	-0.289545	-0.114717	-0.30414	-0.140444
	-0.295263	-0.0766747	-0.242595	-0.0934604
	-0.297288	-0.0614396	-0.220065	0.0219771
	-0.322484	-0.119471	-0.251886	0.0709421
	-0.357605	-0.225896	-0.285918	0.042958
	-0.378421	-0.301871	-0.28198	0.026924
	-0.368331	-0.338262	-0.286257	0.0121874
	-0.322664	-0.365307	-0.352414	0.00631996
	-0.25804	-0.392525	-0.460419	0.0681515
	-0.217274	-0.410885	-0.520401	0.103914
	-0.208371	-0.414057	-0.454084	-0.0376559
	-0.205983	-0.40371	-0.269859	-0.256974
	-0.19541	-0.38023	-0.0715111	-0.37009
	-0.204553	-0.364823	0.0271198	-0.360293
	-0.24928	-0.366786	0.0118341	-0.279976
	-0.322058	-0.345043	-0.0514001	-0.161225
	-0.401125	-0.284315	-0.0980477	-0.106029
	-0.446126	-0.253014	-0.102657	-0.160564
	-0.428569	-0.286772	-0.0917081	-0.18709
	-0.376182	-0.33242	-0.110733	-0.129248
	-0.334531	-0.370025	-0.162798	-0.130937
	-0.301431	-0.407907	-0.187042	-0.247018
	-0.277726	-0.437113	-0.156593	-0.336722
	-0.280583	-0.480644	-0.111589	-0.330804
	-0.302883	-0.579869	-0.0915431	-0.0977781
	-0.325995	-0.691678	-0.0668806	0.0525042
	-0.348836	-0.732748	0.00809017	0.129447
	-0.35409	-0.683995	0.122433	0.0176144
	-0.315928	-0.578777	0.209131	-0.167609
	-0.25273	-0.471486	0.185983	-0.212275
	-0.209061	-0.406779	0.0675766	-0.153139
	-0.200888	-0.406184	-0.028086	-0.150035
	-0.220971	-0.42633	0.00468246	-0.189833
	-0.256898	-0.414885	0.131067	-0.200743
	-0.290685	-0.407889	0.229982	-0.17602
	-0.293269	-0.466202	0.214497	-0.0832683
	-0.275676	-0.545982	0.0879666	0.0662915
	-0.26168	-0.584109	-0.0597239	0.101011
	-0.242121	-0.603156	-0.120497	-0.0431319
	-0.199712	-0.627178	-0.0681956	-0.190764
	-0.166381	-0.667642	0.00651831	-0.226396
	-0.174094	-0.734924	0.0104349	-0.221871
	-0.21852	-0.78229	-0.053665	-0.213381
	-0.277055	-0.74551	-0.114092	-0.18394
	-0.312606	-0.669771	-0.104424	-0.190436
	-0.292484	-0.634924	-0.0479928	-0.232158
	-0.23227	-0.633532	-0.0282886	-0.208059
	-0.191913	-0.64248	-0.0997797	-0.158882
	-0.203527	-0.650749	-0.215558	-0.248285
	-0.244626	-0.641094	-0.287744	-0.44939
	-0.267295	-0.598379	-0.275198	-0.610314
	-0.243698	-0.542576	-0.219157	-0.676568
	-0.181497	-0.508161	-0.195259	-0.642105
	-0.117909	-0.492922	-0.221785	-0.500701
	-0.100231	-0.492587	-0.25171	-0.377397
	-0.130339	-0.515954	-0.219509	-0.387847
	-0.159545	-0.555798	-0.127375	-0.430913
	-0.170713	-0.581457	-0.0482535	-0.377347
	-0.190654	-0.605353	-0.0467753	-0.281831
	-0.23301	-0.628731	-0.0863704	-0.2045
	-0.269155	-0.601873	-0.0821736	-0.123328
	-0.273074	-0.535328	-0.0119484	-0.0788062
	-0.229718	-0.500174	0.0701039	-0.134051
	-0.169042	-0.529401	0.106299	-0.201399
	-0.149796	-0.601154	0.0970361	-0.223011
	-0.193892	-0.699639	0.0977615	-0.291272
	-0.250027	-0.787545	0.150661	-0.428392
	-0.269164	-0.834882	0.213474	-0.506381
	-0.258301	-0.859173	0.199903	-0.482431
	-0.251005	-0.86606	0.0968495	-0.428633
	-0.271285	-0.837862	-0.02747	-0.352617
	-0.317698	-0.763162	-0.0943191	-0.290693
	-0.366245	-0.683729	-0.0822643	-0.320861
	-0.385204	-0.646689	-0.0262488	-0.383787
	-0.378111	-0.64589	-0.000690799	-0.351507
	-0.375044	-0.654961	-0.04234	-0.307665
	-0.379343	-0.67147	-0.0965289	-0.394206
	-0.371063	-0.676061	-0.0838762	-0.549146
	-0.351388	-0.644163	-0.00114013	-0.643652
	-0.329886	-0.617767	0.0732728	-0.670524
	-0.29816	-0.623537	0.0809986	-0.636436
	-0.256262	-0.621855	0.0274968	-0.557376
	-0.210727	-0.583571	-0.00667397	-0.554381
	-0.147629	-0.533124	0.04609	-0.677265
	-0.0813485	-0.492894	0.150661	-0.752355
	-0.0502651	-0.491232	0.196632	-0.672851
	-0.0717351	-0.545457	0.147376	-0.551776
	-0.112099	-0.607559	0.0811797	-0.472112
	-0.139935	-0.615502	0.06909	-0.405759
	-0.140265	-0.56462	0.102009	-0.404949
	-0.124603	-0.520803	0.110533	-0.475821
	-0.121124	-0.513029	0.0394058	-0.501305
	-0.155411	-0.514539	-0.0817367	-0.488715
	-0.222841	-0.521933	-0.13775	-0.555857
	-0.280305	-0.543517	-0.0477808	-0.646327
	-0.301785	-0.558184	0.12787	-0.634287
	-0.296685	-0.560355	0.256733	-0.572084
	-0.27571	-0.567413	0.252305	-0.52259
	-0.239708	-0.541368	0.146421	-0.445055
	-0.198974	-0.473926	0.0432503	-0.369074
	-0.154019	-0.42311	0.0212295	-0.371878
	-0.100092	-0.399797	0.0541596	-0.398244
	-0.0717499	-0.362659	0.0540078	-0.419566
	-0.108184	-0.33971	0.00140172	-0.541806
	-0.186007	-0.36332	-0.0346634	-0.760287
	-0.244725	-0.41605	0.0252245	-0.902144
	-0.254387	-0.493313	0.154521	-0.912033
	-0.235804	-0.594775	0.242793	-0.857902
	-0.223566	-0.685045	0.216358	-0.74568
	-0.243912	-0.708745	0.121754	-0.594348
	-0.283539	-0.669497	0.0588252	-0.507626
	-0.300488	-0.615613	0.0614319	-0.455789
	-0.265864	-0.575344	0.0734945	-0.327322
	-0.218719	-0.580468	0.010935	-0.189014
	-0.203214	-0.63437	-0.129659	-0.186517
	-0.217483	-0.682602	-0.243564	-0.286767
	-0.237105	-0.67069	-0.231346	-0.414145
	-0.243253	-0.642138	-0.111235	-0.563619
	-0.220808	-0.639312	0.0011323	-0.662915
	-0.190303	-0.622429	0.00710749	-0.63024
	-0.194971	-0.58223	-0.101218	-0.560299
	-0.223759	-0.539795	-0.224172	-0.568939
	-0.235701	-0.488177	-0.271919	-0.586319
	-0.22798	-0.430632	-0.253453	-0.546547
	-0.222376	-0.415527	-0.23409	-0.513154
	-0.236052	-0.440329	-0.228073	-0.514635
	-0.281291	-0.464457	-0.189257	-0.51797
	-0.352276	-0.499571	-0.0899461	-0.572756
	-0.406155	-0.557904	0.048282	-0.690507
	-0.411902	-0.617367	0.151255	-0.756986
	-0.38411	-0.654698	0.1571	-0.753798
	-0.342203	-0.670064	0.0895282	-0.799914
	-0.288564	-0.633469	0.0527157	-0.872471
	-0.228106	-0.526358	0.0973604	-0.8444
	-0.185999	-0.401755	0.167918	-0.724744
	-0.166545	-0.32471	0.188607	-0.60537
	-0.171185	-0.294192	0.142394	-0.503614
	-0.197667	-0.283398	0.0638649	-0.461597
	-0.224437	-0.318224	0.0202206	-0.525125
	-0.222219	-0.400779	0.058381	-0.591582
	-0.215302	-0.483931	0.127355	-0.538484
	-0.229104	-0.539976	0.144704	-0.455429
	-0.243612	-0.559072	0.108961	-0.457398
	-0.239892	-0.529793	0.0769027	-0.500983
	-0.219903	-0.484121	0.0887431	-0.546106
	-0.195596	-0.486703	0.140286	-0.623289
	-0.190787	-0.553744	0.192313	-0.676254
	-0.226373	-0.640889	0.178939	-0.655456
	-0.278713	-0.700196	0.108506	-0.658722
	-0.297195	-0.713188	0.0586189	-0.713375
	-0.261606	-0.673148	0.0687024	-0.709576
	-0.208412	-0.613068	0.100807	-0.654037
	-0.187335	-0.588184	0.117089	-0.659095
	-0.200655	-0.587448	0.131692	-0.684777
	-0.218078	-0.561009	0.177095	-0.690971
	-0.223341	-0.518297	0.281195	-0.619013
	-0.212665	-0.524428	0.417187	-0.556083
	-0.200281	-0.57932	0.50642	-0.459318
	-0.209766	-0.656515	0.479667	-0.376077
	-0.23891	-0.733318	0.362331	-0.365627
	-0.261864	-0.769922	0.242052	-0.342921
	-0.286813	-0.757047	0.186898	-0.247373
	-0.317715	-0.743824	0.201189	-0.191529
	-0.335939	-0.754874	0.221149	-0.223854
	-0.321422	-0.735563	0.188281	-0.273703
	-0.291122	-0.679392	0.119221	-0.331275
	-0.271874	-0.643451	0.0824579	-0.398391
	-0.27044	-0.661563	0.0956504	-0.366457
	-0.278548	-0.70972	0.0977684	-0.243852
	-0.288559	-0.7371	0.0449117	-0.211898
	-0.28711	-0.69939	-0.0319937	-0.308851
	-0.264721	-0.593975	-0.047516	-0.39621
	-0.242821	-0.511385	0.0217677	-0.429211
	-0.240254	-0.543834	0.110247	-0.421146
	-0.245483	-0.67064	0.142884	-0.323975
	-0.251531	-0.791928	0.11891	-0.189501
	-0.254253	-0.854262	0.0969163	-0.157443
	-0.237096	-0.857639	0.119865	-0.203867
	-0.207644	-0.800645	0.160543	-0.207721
	-0.20477	-0.735176	0.149205	-0.20736
	-0.233905	-0.708602	0.0769974	-0.273676
	-0.273963	-0.694157	0.0011662	-0.343825
	-0.320806	-0.664096	-0.0237089	-0.382528
	-0.359549	-0.665091	0.00427389	-0.442057
	-0.367093	-0.709086	0.0488934	-0.467361
	-0.339345	-0.734939	0.0599129	-0.388063
	-0.300061	-0.721634	0.0234438	-0.302223
	-0.26261	-0.695535	-0.00525776	-0.289735
	-0.243778	-0.68831	0.0323577	-0.257913
	-0.25626	-0.735566	0.119322	-0.209288
	-0.293429	-0.856486	0.179656	-0.257911
	-0.323313	-0.976152	0.16245	-0.368836
	-0.338882	-0.994838	0.0760952	-0.421741
	-0.349189	-0.94022	-0.0236543	-0.432265
	-0.330643	-0.911655	-0.0669269	-0.413558
	-0.265011	-0.929065	-0.0453303	-0.311046
	-0.184423	-0.95713	-0.0191986	-0.205816
	-0.121074	-0.99197	-0.0349141	-0.249359
	-0.0814052	-1.01464	-0.0543715	-0.378858
	-0.0820909	-1.007	-0.0395388	-0.431944
	-0.128825	-1.01495	0.00430132	-0.409251
	-0.189241	-1.05656	0.0478159	-0.33573
	-0.237868	-1.06418	0.0534605	-0.192614
	-0.257754	-1.00655	0.0273551	-0.0860878
	-0.226464	-0.942154	0.0422788	-0.127572
	-0.154616	-0.906464	0.149985	-0.202389
	-0.0910589	-0.907031	0.271882	-0.185275
	-0.0737463	-0.942812	0.303558	-0.133931
	-0.100087	-0.969516	0.227655	-0.092927
	-0.148286	-0.936604	0.112783	-0.0241329
	-0.191733	-0.901954	0.0432347	0.0105487
	-0.218769	-0.948272	0.0542451	-0.0326955
	-0.218648	-1.04314	0.0988616	-0.0578257
	-0.205488	-1.10785	0.0968659	-0.0241961
	-0.193242	-1.13232	0.0246848	-0.0358844
	-0.175895	-1.15395	-0.076847	-0.0775358
	-0.147054	-1.17101	-0.147153	-0.0378871
	-0.127581	-1.18577	-0.154146	0.0411651
	-0.127416	-1.1904	-0.115174	0.0483166
	-0.134667	-1.14194	-0.0755705	0.0124519
	-0.151108	-1.05034	-0.065947	-0.0254381
	-0.181467	-0.998738	-0.065101	-0.0829369
	-0.216542	-1.02575	-0.0670996	-0.0959541
	-0.2462	-1.08083	-0.101751	-0.0135368
	-0.262809	-1.11778	-0.189485	0.0236976
	-0.260656	-1.11007	-0.280556	-0.082447
	-0.238148	-1.05403	-0.293659	-0.1914
	-0.212129	-1.00589	-0.216272	-0.198482
	-0.204932	-1.02284	-0.121926	-0.172745
	-0.220289	-1.07343	-0.100946	-0.150686
	-0.242475	-1.06977	-0.158133	-0.111682
	-0.269051	-1.01222	-0.219714	-0.111163
	-0.297926	-0.965416	-0.202245	-0.149201
	-0.3056	-0.964808	-0.105007	-0.109384
	-0.290712	-0.994446	-0.0172194	0.00820537
	-0.264865	-1.02066	-0.0291953	0.0630649
	-0.239627	-1.01391	-0.127906	0.0435042
	-0.231059	-0.992229	-0.221549	0.0210174
	-0.260953	-1.03936	-0.230989	-0.0259062
	-0.305249	-1.16176	-0.138432	-0.11635
	-0.333816	-1.24987	-0.0181028	-0.155927
	-0.342784	-1.21401	0.0306149	-0.144676
	-0.329602	-1.08696	0.000637708	-0.156972
	-0.28379	-0.948523	-0.0356098	-0.123848
	-0.217465	-0.861357	-0.0445011	0.0408224
	-0.158018	-0.872662	-0.0656099	0.214461
	-0.121326	-0.956464	-0.131231	0.268034
	-0.110564	-1.03733	-0.239675	0.229838
	-0.125193	-1.07772	-0.340317	0.114849
	-0.152483	-1.10345	-0.368152	-0.059819
	-0.167633	-1.11785	-0.313956	-0.13061
	-0.167056	-1.08407	-0.248705	-0.0235582
	-0.173244	-1.00261	-0.225356	0.0719233
	-0.187364	-0.888969	-0.215548	0.0287147
	-0.206604	-0.755719	-0.179414	-0.0535846
	-0.237425	-0.64707	-0.115286	-0.128711
	-0.261609	-0.639166	-0.0652178	-0.24348
	-0.255799	-0.718886	-0.0731145	-0.346861
	-0.242005	-0.806244	-0.156034	-0.404701
	-0.2489	-0.892606	-0.244841	-0.477026
	-0.261635	-1.00529	-0.241202	-0.515304
	-0.271912	-1.11417	-0.143432	-0.391024
	-0.280489	-1.18433	-0.0417883	-0.190203
	-0.288555	-1.21365	-0.0130962	-0.0957947
	-0.293808	-1.17879	-0.056949	-0.116022
	-0.297316	-1.08806	-0.108608	-0.193464
	-0.291107	-1.02949	-0.0905972	-0.333754
	-0.271955	-1.05252	-0.014661	-0.428242
	-0.245974	-1.09592	0.0207449	-0.36013
	-0.230753	-1.11565	-0.0330251	-0.222012
	-0.23214	-1.1207	-0.123232	-0.125569
	-0.230519	-1.11843	-0.159278	-0.00827294
	-0.22514	-1.12898	-0.126058	0.126742
	-0.234878	-1.1857	-0.0721832	0.148635
	-0.252406	-1.26524	-0.0515988	0.0755908
	-0.269042	-1.29913	-0.0554939	0.0367201
	-0.288782	-1.28418	-0.0336864	0.0216404
	-0.297562	-1.26294	0.0253729	-0.00458078
	-0.273467	-1.22854	0.0782964	0.0134987
	-0.239763	-1.17357	0.0627504	0.0370224
	-0.229442	-1.13072	-0.0173118	-0.0676148
	-0.242254	-1.1088	-0.100355	-0.171352
	-0.263931	-1.06736	-0.116608	-0.193977
	-0.281513	-1.02469	-0.0642414	-0.182326
	-0.288791	-1.00359	-0.00888027	-0.187315
	-0.282325	-0.976248	-0.0144795	-0.16355
	-0.271654	-0.957092	-0.0848336	-0.150551
	-0.260214	-0.998034	-0.151857	-0.240263
	-0.243026	-1.08476	-0.140404	-0.342225
	-0.217978	-1.1527	-0.0601249	-0.351098
	-0.209373	-1.19231	-0.00938922	-0.317232
	-0.219062	-1.19539	-0.0535067	-0.281001
	-0.236834	-1.12509	-0.147147	-0.17831
	-0.273084	-1.00386	-0.191769	-0.0540528
	-0.319609	-0.897532	-0.128099	-0.0263284
	-0.336034	-0.81993	0.00556881	-0.0641771
	-0.315641	-0.753285	0.111687	-0.0856249
	-0.288031	-0.728941	0.12171	-0.134594
	-0.266025	-0.757449	0.0749471	-0.214066
	-0.253707	-0.785164	0.032064	-0.226647
	-0.256933	-0.79199	-0.0114615	-0.178348
	-0.259561	-0.800689	-0.0848206	-0.157077
	-0.261696	-0.80617	-0.184417	-0.129037
	-0.284415	-0.800534	-0.271544	-0.0664647
	-0.331928	-0.830693	-0.296368	-0.0539507
	-0.38021	-0.901598	-0.225753	-0.071035
	-0.413028	-0.955086	-0.115555	0.00102496
	-0.430838	-0.95953	-0.0629533	0.106721
	-0.435636	-0.937609	-0.094141	0.121442
	-0.43525	-0.900949	-0.145666	0.103264
	-0.445374	-0.869924	-0.158854	0.100682
	-0.469124	-0.89668	-0.113767	0.0249262
	-0.463405	-0.974369	-0.0292017	-0.124429
	-0.407571	-1.03049	0.0356296	-0.231811
	-0.3245	-1.03723	0.0474293	-0.310822
	-0.250517	-1.02719	0.0423045	-0.418941
	-0.2106	-0.988042	0.0537524	-0.487977
	-0.219403	-0.894629	0.0568057	-0.465015
	-0.253099	-0.785462	0.0341115	-0.430143
	-0.271873	-0.714327	0.0177217	-0.379238
	-0.270755	-0.698537	0.0161535	-0.259223
	-0.262267	-0.747542	0.0158031	-0.156024
	-0.2538	-0.840284	-0.00607449	-0.14204
	-0.251774	-0.883621	-0.0617193	-0.129942
	-0.260436	-0.835114	-0.142648	-0.129684
	-0.282437	-0.774893	-0.197113	-0.254956
	-0.300231	-0.764029	-0.186509	-0.418647
	-0.28807	-0.778777	-0.135396	-0.429468
	-0.247149	-0.790987	-0.0861816	-0.303521
	-0.214483	-0.798629	-0.0661278	-0.154289
	-0.218507	-0.78627	-0.0823524	-0.0285338
	-0.270579	-0.788455	-0.123621	-0.0073634
	-0.351838	-0.848894	-0.140228	-0.139735
	-0.398507	-0.939025	-0.0999628	-0.258393
	-0.383723	-0.974765	-0.0245183	-0.209421
	-0.345712	-0.940709	0.0405098	-0.105559
	-0.317826	-0.875062	0.0759293	-0.0898322
	-0.295968	-0.781573	0.100239	-0.146229
	-0.286664	-0.669203	0.13596	-0.25153
	-0.294273	-0.572897	0.18675	-0.387736
	-0.311759	-0.505163	0.222254	-0.40965
	-0.326032	-0.464353	0.218538	-0.286166
	-0.333698	-0.501207	0.195505	-0.203576
	-0.329301	-0.623851	0.191455	-0.26159
	-0.311762	-0.7433	0.226416	-0.335184
	-0.301671	-0.819952	0.266229	-0.359779
	-0.318221	-0.883718	0.257466	-0.359616
	-0.343123	-0.929038	0.179775	-0.296526
	-0.347879	-0.929163	0.0716629	-0.197858
	-0.32708	-0.920975	-0.015238	-0.215703
	-0.278257	-0.92289	-0.0544511	-0.362033
	-0.211367	-0.894605	-0.0602138	-0.491154
	-0.182917	-0.844959	-0.0672454	-0.584211
	-0.216939	-0.810097	-0.0720049	-0.715699
	-0.278546	-0.77598	-0.0421194	-0.822935
	-0.335144	-0.691252	0.0261341	-0.846264
	-0.372405	-0.584143	0.0843063	-0.857559
	-0.38138	-0.487342	0.100247	-0.872154
	-0.390086	-0.411208	0.0769869	-0.828018
	-0.423096	-0.410639	0.0474477	-0.780597
	-0.44102	-0.523211	0.0513223	-0.799289
	-0.415488	-0.622837	0.0890931	-0.793267
	-0.372627	-0.64093	0.112609	-0.737179
	-0.355846	-0.639295	0.0884463	-0.744956
	-0.372606	-0.686124	0.043013	-0.813669
	-0.405944	-0.76855	0.0128547	-0.822358
	-0.429743	-0.865913	0.00335051	-0.745414
	-0.433037	-0.945305	0.0127238	-0.664635
	-0.421434	-0.939391	0.0415698	-0.545104
	-0.41745	-0.856401	0.0803183	-0.411527
	-0.431499	-0.800588	0.124157	-0.379496
	-0.443339	-0.808539	0.173364	-0.408087
	-0.444997	-0.824466	0.175759	-0.398679
	-0.456294	-0.815175	0.0927723	-0.428461
	-0.47635	-0.795802	-0.0383416	-0.576058
	-0.495572	-0.778899	-0.140611	-0.728336
	-0.501447	-0.790331	-0.178307	-0.800254
	-0.498616	-0.865712	-0.15132	-0.8092
	-0.458727	-0.951758	-0.0777341	-0.718607
	-0.417841	-0.966036	-0.00463959	-0.524423
	-0.406018	-0.911477	0.0401087	-0.395037
	-0.412477	-0.842519	0.0533147	-0.403878
	-0.41824	-0.753447	0.0441257	-0.409896
	-0.423969	-0.676687	0.0174693	-0.353593
	-0.447358	-0.687437	-0.010468	-0.322899
	-0.48664	-0.770622	-0.0294628	-0.324346
	-0.523859	-0.835141	-0.0458852	-0.318811
	-0.539358	-0.847843	-0.0556873	-0.368353
	-0.531192	-0.824901	-0.0495067	-0.467355
	-0.505887	-0.777846	-0.0396678	-0.506734
	-0.496199	-0.749504	-0.0560347	-0.486362
	-0.521714	-0.766115	-0.101981	-0.505289
	-0.55439	-0.793768	-0.15543	-0.53577
	-0.56716	-0.798674	-0.196265	-0.522161
	-0.576384	-0.813017	-0.20041	-0.51913
	-0.578163	-0.858783	-0.157041	-0.533621
	-0.584163	-0.888974	-0.0738514	-0.477204
	-0.593509	-0.888599	0.0149897	-0.408817
	-0.584194	-0.887884	0.0886856	-0.45421
	-0.541689	-0.890518	0.13671	-0.57072
	-0.491939	-0.85326	0.164051	-0.672677
	-0.470594	-0.789318	0.18214	-0.797715
	-0.493163	-0.739426	0.192456	-0.916609
	-0.536883	-0.67594	0.198021	-0.928419
	-0.575662	-0.651168	0.199295	-0.873641
	-0.597622	-0.68689	0.194034	-0.8414
	-0.595812	-0.733418	0.162615	-0.773588
	-0.574965	-0.736492	0.0876045	-0.654174
	-0.559513	-0.741057	-0.0185297	-0.601481
	-0.546209	-0.784876	-0.0960471	-0.605544
	-0.51146	-0.840872	-0.0983547	-0.53515
	-0.477903	-0.908965	-0.0409117	-0.430966
	-0.467216	-0.996204	0.0304835	-0.429164
	-0.47957	-1.05205	0.0782766	-0.496787
	-0.514034	-1.02752	0.0993345	-0.564355
	-0.548853	-0.952764	0.129877	-0.65436
	-0.538359	-0.869939	0.198921	-0.729732
	-0.491923	-0.782055	0.273655	-0.708104
	-0.46057	-0.728763	0.294517	-0.663393
	-0.460721	-0.751623	0.257505	-0.653603
	-0.472913	-0.801438	0.205947	-0.583101
	-0.472719	-0.813165	0.185815	-0.430653
	-0.44503	-0.820984	0.211067	-0.303255
	-0.398362	-0.856703	0.262591	-0.189457
	-0.354837	-0.90639	0.283448	-0.0558642
	-0.336119	-0.978915	0.253093	-0.0462655
	-0.33961	-1.04749	0.213571	-0.227416
	-0.361394	-1.03309	0.209774	-0.399422
	-0.410929	-0.921878	0.238847	-0.456381
	-0.486479	-0.821502	0.267037	-0.491594
	-0.535681	-0.797719	0.274939	-0.53534
	-0.533036	-0.813367	0.255319	-0.555782
	-0.511996	-0.820559	0.23487	-0.616968
	-0.507768	-0.816038	0.23996	-0.714328
	-0.546838	-0.780279	0.257972	-0.725594
	-0.627588	-0.723367	0.251998	-0.675661
	-0.696096	-0.703537	0.215715	-0.69285
	-0.690649	-0.730328	0.177317	-0.745826
	-0.631578	-0.760222	0.161528	-0.745498
	-0.575104	-0.809277	0.182502	-0.730833
	-0.56074	-0.902632	0.226327	-0.698518
	-0.570037	-0.9653	0.253531	-0.596059
	-0.576378	-0.949015	0.238283	-0.513821
	-0.568083	-0.886319	0.201697	-0.56573
	-0.558378	-0.792204	0.186463	-0.667079
	-0.568015	-0.685929	0.207107	-0.732577
	-0.604154	-0.641688	0.248657	-0.813614
	-0.639033	-0.676547	0.278481	-0.905605
	-0.633262	-0.706723	0.287429	-0.901823
	-0.591289	-0.691185	0.284506	-0.833695
	-0.543083	-0.658168	0.280388	-0.810727
	-0.49604	-0.62267	0.268788	-0.822429
	-0.471824	-0.600532	0.241098	-0.845471
	-0.483899	-0.629115	0.205549	-0.938566
	-0.506927	-0.702582	0.180739	-1.05245
	-0.513998	-0.744894	0.189267	-1.08554
	-0.512884	-0.750363	0.215635	-1.09476
	-0.514375	-0.748809	0.222749	-1.14494
	-0.529469	-0.722882	0.184746	-1.13012
	-0.569334	-0.640658	0.122054	-1.01861
	-0.62266	-0.551596	0.0880331	-0.936611
	-0.675064	-0.500693	0.123798	-0.909373
	-0.715199	-0.471332	0.216787	-0.865979
	-0.741616	-0.476725	0.300228	-0.83641
	-0.742469	-0.505714	0.327151	-0.862709
	-0.709202	-0.492384	0.310716	-0.871307
	-0.660085	-0.43669	0.287748	-0.864119
	-0.635929	-0.426419	0.278917	-0.934379
	-0.650396	-0.481087	0.282769	-1.05208
	-0.685851	-0.533642	0.276951	-1.09929
	-0.720724	-0.559968	0.228012	-1.09676
	-0.731803	-0.566792	0.155807	-1.09694
	-0.724231	-0.552724	0.0996626	-1.05371
	-0.729809	-0.530424	0.0775582	-0.981705
	-0.739741	-0.531697	0.0851196	-0.979896
	-0.718861	-0.537391	0.107242	-0.995948
	-0.668971	-0.491495	0.111574	-0.945447
	-0.626446	-0.412817	0.0894713	-0.928762
	-0.616308	-0.353529	0.0823338	-1.04011
	-0.64939	-0.318016	0.118342	-1.17106
	-0.699927	-0.309007	0.186355	-1.25448
	-0.739125	-0.372555	0.262882	-1.32445
	-0.759205	-0.462814	0.330797	-1.34417
	-0.766809	-0.481615	0.351623	-1.29064
	-0.773091	-0.415926	0.310199	-1.28004
	-0.771274	-0.314665	0.241219	-1.34543
	-0.750084	-0.195106	0.183966	-1.36585
	-0.725134	-0.102015	0.151972	-1.34471
	-0.73588	-0.102875	0.151248	-1.38173
	-0.783897	-0.189398	0.180639	-1.41769
	-0.843689	-0.295114	0.209455	-1.34231
	-0.888916	-0.380258	0.214624	-1.20682
	-0.895998	-0.430242	0.194111	-1.06811
	-0.873513	-0.421011	0.152606	-0.922848
	-0.860804	-0.364051	0.11965	-0.858439
	-0.861878	-0.319401	0.128989	-0.941451
	-0.840822	-0.280809	0.173399	-1.0234
	-0.779205	-0.185575	0.190601	-1.01602
	-0.694293	-0.0476056	0.152614	-1.02713
	-0.623942	0.0715231	0.0948197	-1.08498
	-0.597588	0.172869	0.0758763	-1.07513
	-0.606127	0.234826	0.123061	-1.01027
	-0.610015	0.221613	0.208155	-0.971361
	-0.54948	0.217772	0.269492	-0.934265
	-0.422366	0.318905	0.275031	-0.881841
	-0.293721	0.484528	0.268974	-0.873137
	-0.206617	0.629788	0.310083	-0.847169
	-0.144084	0.749252	0.420663	-0.704058
	-0.0915639	0.829722	0.560689	-0.518003
	-0.0364296	0.882059	0.66716	-0.381623
	0.0286281	0.957019	0.717451	-0.219117
	0.06534	1.05776	0.743808	-0.00334064
	0.0568615	1.1271	0.787856	0.155834
	0.0531158	1.16643	0.843925	0.248927
	0.098722	1.25703	0.874833	0.343786
	0.187263	1.41223	0.851111	0.386824
	0.30116	1.56416	0.79273	0.346182
	0.411407	1.69431	0.762895	0.344059
	0.48942	1.80836	0.805973	0.410767
	0.537318	1.8811	0.906328	0.463569
	0.569749	1.93554	1.00018	0.540899
	0.590358	2.03761	1.0406	0.71998
	0.595205	2.14483	1.02541	0.902043
	0.597867	2.20632	1.00071	0.999317
	0.631835	2.28197	0.995894	1.07335
	0.70482	2.41691	0.9987	1.12407
	0.795724	2.55677	0.98886	1.05987
	0.888212	2.66752	0.98054	0.953439
	0.975533	2.75599	0.999801	0.936638
	1.05046	2.79377	1.04211	1.00056
	1.13836	2.79036	1.09279	1.1126
	1.24378	2.8119	1.13321	1.30609
	1.32416	2.88489	1.15944	1.48362
	1.35589	2.96367	1.19865	1.52617
	1.35669	3.05562	1.27746	1.507
	1.34875	3.19296	1.35678	1.66099
	1.3581	3.33419	1.37784	1.87289
	1.40799	3.42371	1.35758	2.03128
	1.4733	3.48898	1.36409	2.1787
	1.52673	3.5397	1.436	2.32118
	1.57107	3.54415	1.54936	2.43062
	1.6192	3.55084	1.6411	2.57876
	1.66726	3.63442	1.6487	2.78326
	1.69751	3.75036	1.59047	2.91191
	1.69898	3.85229	1.56475	2.94643
	1.68757	3.9619	1.62308	3.00075
	1.68004	4.08856	1.73887	3.05822
	1.69963	4.19286	1.86291	3.00542
	1.75482	4.27424	1.95663	2.8996
	1.81381	4.34331	1.97759	2.8255
	1.8368	4.37692	1.93656	2.76564
	1.83937	4.37604	1.88695	2.76583
	1.8525	4.37777	1.86607	2.90812
	1.88618	4.37024	1.88477	3.05297
	1.92644	4.30279	1.93822	3.03721
	1.95566	4.22977	2.00848	2.94967
	1.96376	4.23154	2.0595	2.91639
	1.96805	4.28912	2.07771	2.89955
	1.98392	4.34275	2.06114	2.91002
	2.00592	4.40179	2.01416	2.98129
	2.01616	4.44953	1.96709	3.01482
	2.00302	4.46007	1.97007	2.96178
	1.9941	4.47719	2.04318	2.96438
	2.01635	4.54947	2.14552	3.08918
	2.06537	4.64462	2.22625	3.2072
	2.12759	4.72003	2.25378	3.25939
	2.18909	4.76198	2.23337	3.28402
	2.22127	4.73499	2.19359	3.24664
	2.22716	4.64852	2.15674	3.15224
	2.24817	4.59533	2.1344	3.13461
	2.28906	4.62436	2.13201	3.20254
	2.32385	4.68871	2.16819	3.2364
	2.34721	4.73394	2.23652	3.27366
	2.36351	4.78517	2.30721	3.41818
	2.37759	4.8363	2.33737	3.57284
	2.39666	4.84707	2.30705	3.64111
	2.41123	4.83785	2.23979	3.6699
	2.39762	4.8326	2.19452	3.74122
	2.36746	4.79093	2.22088	3.7587
	2.36375	4.71991	2.3203	3.78018
	2.41564	4.70534	2.43834	3.82428
	2.48723	4.72857	2.49274	3.74997
	2.52591	4.7459	2.46268	3.52159
	2.52539	4.78474	2.40225	3.33655
	2.51142	4.8548	2.37176	3.27747
	2.51635	4.90586	2.38586	3.25067
	2.56081	4.94918	2.41024	3.24382
	2.61638	5.01231	2.39762	3.27479
	2.62758	5.03979	2.35196	3.27371
	2.60371	5.01849	2.33907	3.28548
	2.58608	5.01609	2.38293	3.45526
	2.5954	5.0472	2.43072	3.70356
	2.62517	5.06543	2.42978	3.81483
	2.6459	5.06398	2.37684	3.78566
	2.60697	5.08948	2.3201	3.72871
	2.51518	5.12366	2.32008	3.67387
	2.44953	5.1415	2.39254	3.6885
	2.46611	5.17078	2.47537	3.83002
	2.54645	5.2032	2.50734	3.9475
	2.63141	5.17744	2.49012	3.8851
	2.67352	5.12533	2.47939	3.77176
	2.67305	5.11306	2.49174	3.75395
	2.65513	5.12541	2.50197	3.78024
	2.64901	5.13716	2.49056	3.80455
	2.64641	5.15455	2.46142	3.86854
	2.61775	5.15161	2.45465	3.90096
	2.567	5.10258	2.51212	3.868
	2.53999	5.0708	2.62414	3.89273
	2.54591	5.09239	2.71261	3.99696
	2.56533	5.12229	2.73037	4.02608
	2.58664	5.14337	2.70205	3.97463
	2.58719	5.21484	2.67798	3.956
	2.56721	5.33597	2.6932	3.95541
	2.56185	5.43341	2.73461	3.93787
	2.58836	5.47126	2.7613	3.96591
	2.62506	5.44538	2.74774	4.00491
	2.65903	5.34353	2.71866	3.97054
	2.69271	5.22318	2.71342	3.95966
	2.72545	5.18544	2.73232	4.0571
	2.75316	5.23081	2.74026	4.18591
	2.76508	5.2868	2.70829	4.16975
	2.76002	5.34999	2.65488	4.07554
	2.74387	5.4117	2.60865	3.97386
	2.72531	5.44421	2.59504	3.85798
	2.72875	5.47243	2.59898	3.7868
	2.76288	5.52971	2.57378	3.79949
	2.8044	5.58069	2.50189	3.77225
	2.84094	5.61734	2.43723	3.6713
	2.88585	5.69312	2.44646	3.63046
	2.92855	5.80648	2.53304	3.68766
	2.95959	5.91002	2.64422	3.73953
	2.97355	5.97911	2.70724	3.79174
	2.95537	6.02585	2.69624	3.85518
	2.90633	6.03413	2.65026	3.82866
	2.85645	6.00775	2.6259	3.72246
	2.82745	6.00835	2.62619	3.69479
	2.82195	6.05411	2.60204	3.76007
	2.83538	6.08643	2.52674	3.8473
	2.84954	6.09221	2.42881	4.01208
	2.85452	6.12637	2.362	4.28976
	2.85702	6.19556	2.35702	4.53018
	2.86832	6.2798	2.41419	4.62328
	2.89068	6.37994	2.49665	4.62555
	2.89701	6.44617	2.56007	4.55403
	2.87234	6.45527	2.61634	4.43008
	2.85767	6.45777	2.6865	4.42137
	2.89557	6.4931	2.74737	4.58806
	2.98014	6.51299	2.77007	4.737
	3.07379	6.51186	2.77363	4.74999
	3.11713	6.53658	2.77373	4.71384
	3.07609	6.58558	2.77606	4.67422
	2.9996	6.60384	2.78097	4.59475
	2.95349	6.59092	2.77025	4.70985
	2.95052	6.60622	2.72531	4.89185
	2.96585	6.66439	2.67703	4.94087
	2.9843	6.75571	2.68967	4.85775
	2.99302	6.8769	2.77311	4.83354
	3.00048	6.98521	2.89089	4.87812
	3.0214	7.01488	2.98356	4.9028
	3.05197	7.00871	3.01312	4.924
	3.07246	7.04083	2.98144	4.94376
	3.06593	7.08698	2.93946	4.89362
	3.04461	7.10981	2.93252	4.85343
	3.02756	7.11969	2.9466	4.92652
	3.01606	7.09503	2.95621	5.01714
	3.01916	7.02632	2.95721	5.04914
	3.05922	6.98908	2.9651	5.12391
	3.1223	7.03772	2.9917	5.25106
	3.17921	7.11079	3.0404	5.28798
	3.22622	7.16239	3.09339	5.23338
	3.2456	7.19288	3.11614	5.17079
	3.22301	7.21015	3.11848	5.08265
	3.17826	7.22613	3.13953	5.00669
	3.13356	7.31381	3.22014	5.06649
	3.09401	7.48376	3.35384	5.19352
	3.06398	7.64318	3.49213	5.21831
	3.05257	7.73331	3.5801	5.1735
	3.05096	7.77189	3.59549	5.1848
	3.05598	7.74732	3.5521	5.22344
	3.07892	7.66107	3.47063	5.26769
	3.13353	7.61141	3.37556	5.36083
	3.19186	7.63529	3.2772	5.4463
	3.21391	7.67606	3.18639	5.4316
	3.20482	7.71892	3.12371	5.41495
	3.191	7.77096	3.10058	5.47051
	3.18354	7.78094	3.11312	5.48209
	3.18715	7.7395	3.15145	5.39389
	3.18718	7.70439	3.20098	5.32276
	3.14792	7.69556	3.22058	5.31256
	3.09035	7.70732	3.17674	5.35363
	3.07789	7.75183	3.07387	5.52547
	3.12803	7.81041	2.95864	5.80092
	3.21102	7.81588	2.89075	5.97239
	3.28259	7.7656	2.9081	5.99005
	3.30336	7.76201	2.99614	5.99607
	3.27268	7.8262	3.0819	6.02559
	3.24207	7.88336	3.12163	6.03844
	3.25283	7.90167	3.12583	6.06934
	3.29577	7.9116	3.12348	6.08226
	3.33434	7.89166	3.122	5.96038
	3.35267	7.86452	3.13079	5.78498
	3.36954	7.89418	3.14726	5.72662
	3.39686	7.96436	3.16188	5.75233
	3.4379	8.04033	3.18329	5.74514
	3.48205	8.14731	3.20723	5.76538
	3.51074	8.2647	3.20657	5.83626
	3.52302	8.29919	3.18384	5.85801
	3.54564	8.24415	3.18495	5.85421
	3.56825	8.18734	3.22061	5.94673
	3.55316	8.15978	3.2607	6.07128
	3.50184	8.10784	3.28638	6.15202
	3.44403	8.06235	3.29206	6.25341
	3.40723	8.04867	3.26493	6.35829
	3.40785	8.04808	3.20447	6.34076
	3.43927	8.04349	3.1444	6.22871
	3.46766	8.05962	3.10167	6.12333
	3.47495	8.09285	3.08592	6.00372
	3.47636	8.1302	3.1083	5.88011
	3.50375	8.20499	3.14262	5.85976
	3.55178	8.31515	3.14139	5.89734
	3.59659	8.36131	3.1069	5.84255
	3.62675	8.32093	3.08101	5.73792
	3.64678	8.25177	3.05719	5.71462
	3.6523	8.18315	3.02144	5.72804
	3.63889	8.13114	2.9886	5.7093
	3.60101	8.15299	2.98625	5.72361
	3.52553	8.23305	3.01929	5.7556
	3.42995	8.2976	3.07031	5.72901
	3.38437	8.33101	3.09028	5.71041
	3.42234	8.38391	3.03521	5.76949
	3.51574	8.46593	2.94027	5.79103
	3.60344	8.5264	2.87755	5.74979
	3.63528	8.55355	2.89141	5.78281
	3.60571	8.54379	2.96668	5.91612
	3.56254	8.49505	3.05642	6.03549
	3.55756	8.47187	3.11732	6.12407
	3.58382	8.53106	3.14331	6.16481
	3.58708	8.61336	3.1685	6.06599
	3.54536	8.65708	3.20616	5.8827
	3.51053	8.689	3.22456	5.80762
	3.53084	8.69566	3.18285	5.84148
	3.60187	8.62657	3.09924	5.87359
	3.69527	8.52555	3.02746	5.94612
	3.76621	8.46711	2.99169	6.09842
	3.78476	8.45813	2.97883	6.21392
	3.78111	8.47767	2.96633	6.2602
	3.79628	8.54008	2.96688	6.29321
	3.81926	8.6079	2.99754	6.23368
	3.84351	8.64731	3.05012	6.04743
	3.88005	8.67335	3.07896	5.93538
	3.90655	8.70093	3.04541	6.01838
	3.89608	8.68633	2.95863	6.17293
	3.84483	8.63069	2.87297	6.31217
	3.76178	8.60232	2.84505	6.43197
	3.65872	8.59616	2.88323	6.4737
	3.57433	8.53842	2.95839	6.42823
	3.54612	8.42648	3.02061	6.44698
	3.56741	8.32071	3.03142	6.5518
	3.5944	8.24605	3.00571	6.61212
	3.60104	8.24134	2.99716	6.62472
	3.59271	8.33799	3.0172	6.69892
	3.58464	8.4519	3.02745	6.78632
	3.61224	8.50509	3.01264	6.81029
	3.68868	8.54265	2.98758	6.84147
	3.76513	8.59792	2.97548	6.88859
	3.7978	8.62576	2.99054	6.85964
	3.80782	8.62137	3.0261	6.83022
	3.82391	8.62207	3.04849	6.90798
	3.85232	8.61716	3.04669	6.99796
	3.89792	8.60558	3.05714	7.00392
	3.93263	8.62945	3.1082	6.98458
	3.92884	8.70068	3.18371	6.93347
	3.91629	8.75442	3.23596	6.80116
	3.94055	8.75988	3.24299	6.70734
	3.98988	8.74738	3.19998	6.73365
	4.02059	8.73498	3.15084	6.7527
	4.01059	8.71632	3.15812	6.71226
	3.96648	8.72395	3.21555	6.75895
	3.92298	8.73605	3.24432	6.9055
	3.90934	8.69073	3.19993	7.00762
	3.9309	8.62162	3.12891	7.04605
	3.95843	8.60773	3.08497	7.06771
	3.96436	8.63941	3.08738	7.0232
	3.9533	8.68861	3.1109	6.96248
	3.94192	8.77441	3.11051	7.00061
	3.92813	8.87059	3.07125	7.07501
	3.90863	8.92239	3.02183	7.07419
	3.89207	8.93453	2.99277	7.08622
	3.87698	8.94011	2.97576	7.16761
	3.86841	8.94841	2.96908	7.2143
	3.88878	8.9626	2.98721	7.18974
	3.94259	9.00216	3.04084	7.14457
	4.0021	9.03403	3.10976	7.02965
	4.03296	9.00306	3.16384	6.84388
	4.02957	8.9168	3.18046	6.75076
	4.0106	8.89954	3.14675	6.80776
	3.99681	8.91555	3.0979	6.85614
	4.00089	8.93754	3.08093	6.82907
	4.03227	8.97722	3.10889	6.82181
	4.08119	8.98419	3.13786	6.85725
	4.13381	8.91712	3.13276	6.91718
	4.19697	8.82795	3.10503	7.04731
	4.25408	8.77555	3.09066	7.17749
	4.26684	8.7518	3.12297	7.13575
	4.23394	8.76097	3.19848	7.00214
	4.2001	8.79259	3.27929	6.97578
	4.19898	8.83255	3.32737	7.04792
	4.24878	8.85801	3.33974	7.10616
	4.33258	8.90452	3.32291	7.17209
	4.39345	8.98744	3.27707	7.24389
	4.40131	9.05034	3.22361	7.28655
	4.37831	9.07186	3.19153	7.36546
	4.35794	9.11655	3.18764	7.50875
	4.34892	9.18878	3.20879	7.54489
	4.35233	9.24711	3.28157	7.40506
	4.37459	9.29505	3.39859	7.27559
	4.4073	9.33658	3.49684	7.26474
	4.42775	9.32479	3.52387	7.28204
	4.42413	9.26433	3.48311	7.3168
	4.40123	9.20435	3.41596	7.40469
	4.36566	9.13484	3.37035	7.45389
	4.33706	9.0706	3.37218	7.41953
	4.3237	9.07523	3.38616	7.41159
	4.30267	9.16137	3.37388	7.40967
	4.26958	9.25176	3.33949	7.30955
	4.25273	9.30405	3.30825	7.20516
	4.2552	9.30859	3.29535	7.20794
	4.25935	9.23156	3.28732	7.24461
	4.27852	9.06676	3.29122	7.26669
	4.31891	8.89667	3.29321	7.33984
	4.35964	8.79161	3.27781	7.38397
	4.38175	8.74439	3.2534	7.29682
	4.38194	8.74278	3.24002	7.1956
	4.35605	8.79242	3.23898	7.21689
	4.31283	8.84271	3.26069	7.28375
	4.27851	8.85906	3.32301	7.33442
	4.26589	8.88018	3.40747	7.4014
	4.26602	8.90841	3.47219	7.43674
	4.26895	8.88865	3.48388	7.38731
	4.28473	8.85263	3.44543	7.36592
	4.31242	8.87155	3.38556	7.40553
	4.33772	8.92252	3.3595	7.38521
	4.36526	8.95572	3.39525	7.32109
	4.39168	8.97103	3.46008	7.34259
	4.40094	8.96032	3.49068	7.38331
	4.4014	8.92047	3.44689	7.34801
	4.42143	8.89982	3.37191	7.33192
	4.45196	8.89785	3.33995	7.40287
	4.46378	8.86592	3.38368	7.49711
	4.44734	8.81376	3.45519	7.62018
	4.41222	8.83487	3.48663	7.78775
	4.3842	8.94153	3.45832	7.86407
	4.37839	9.04632	3.41994	7.78669
	4.38565	9.09451	3.4349	7.69313
	4.37722	9.08303	3.49526	7.65749
	4.34675	9.025	3.5582	7.6009
	4.31983	8.97857	3.60489	7.55446
	4.32767	9.00698	3.64096	7.58572
	4.36285	9.07137	3.67167	7.61708
	4.39462	9.10182	3.70035	7.59105
	4.41814	9.12085	3.72808	7.60201
	4.4238	9.13549	3.74238	7.62006
	4.41679	9.1141	3.74288	7.52305
	4.42614	9.08067	3.7479	7.39118
	4.43905	9.09339	3.77836	7.38396
	4.41004	9.13018	3.81685	7.47056
	4.33764	9.15488	3.82431	7.58565
	4.26872	9.1784	3.76571	7.7202
	4.23886	9.2118	3.6499	7.76941
	4.25765	9.23792	3.54988	7.6279
	4.30279	9.25486	3.53277	7.43648
	4.33973	9.28434	3.57993	7.35776
	4.35409	9.29117	3.61733	7.35159
	4.36262	9.27353	3.64392	7.34193
	4.37559	9.28385	3.70439	7.3671
	4.38285	9.32153	3.80538	7.41398
	4.37823	9.31404	3.90212	7.42841
	4.37213	9.25418	3.9419	7.47494
	4.3762	9.19652	3.88853	7.56559
	4.38075	9.15573	3.77357	7.57467
	4.37924	9.14109	3.69291	7.50631
	4.36141	9.17086	3.69146	7.53841
	4.31491	9.19202	3.73318	7.66083
	4.26093	9.15865	3.771	7.70051
	4.24704	9.12501	3.78204	7.75886
	4.28334	9.17213	3.75445	7.8217
	4.33589	9.26237	3.69898	7.8059
	4.37606	9.30971	3.64869	7.72918
	4.38372	9.29129	3.61191	7.68819
	4.36012	9.24564	3.6047	7.64501
	4.33378	9.20415	3.66322	7.53841
	4.32517	9.21248	3.78538	7.47076
	4.32574	9.28226	3.89678	7.48821
	4.32245	9.34435	3.93535	7.50431
	4.32469	9.37012	3.90091	7.5296
	4.3434	9.41142	3.82576	7.65089
	4.37421	9.4706	3.77263	7.777
	4.39893	9.47973	3.78885	7.81891
	4.40913	9.43586	3.84745	7.87993
	4.39468	9.39031	3.85181	7.99554
	4.3531	9.37463	3.75577	8.04062
	4.31259	9.41482	3.60724	8.01388
	4.28748	9.51836	3.49776	8.01325
	4.25592	9.60417	3.4895	8.00111
	4.20552	9.61539	3.571	7.95623
	4.16952	9.60628	3.69469	7.9629
	4.17489	9.62719	3.81181	8.00996
	4.2246	9.64181	3.90362	8.00055
	4.30342	9.60579	3.95485	7.99749
	4.36966	9.54629	3.9478	8.06676
	4.38681	9.50749	3.90681	8.11067
	4.36586	9.50955	3.85596	8.07406
	4.3466	9.57562	3.84106	8.06565
	4.34162	9.66779	3.87081	8.09594
	4.3425	9.71114	3.93241	8.08235
	4.34994	9.69981	3.98568	8.07669
	4.36387	9.70491	3.98805	8.14472
	4.3696	9.72691	3.93716	8.17254
	4.36341	9.73333	3.87687	8.11149
	4.36166	9.75551	3.85899	8.06236
	4.35578	9.78699	3.88698	8.04064
	4.33407	9.81245	3.92041	7.99095
	4.31227	9.86616	3.92181	7.99603
	4.30398	9.97215	3.90813	8.09811
	4.30372	10.0367	3.92192	8.17582
	4.31643	9.99008	3.98492	8.18183
	4.33597	9.87331	4.05338	8.20653
	4.33336	9.74991	4.0566	8.22175
	4.31604	9.66181	3.99899	8.1338
	4.31801	9.65174	3.96364	8.01668
	4.34274	9.72241	3.99795	7.9706
	4.36559	9.79079	4.05405	7.97443
	4.37326	9.80772	4.05577	8.00929
	4.35557	9.83226	3.97063	8.10601
	4.31987	9.90075	3.84701	8.12616
	4.30407	9.99064	3.78594	8.07069
	4.331	10.0929	3.82957	8.09511
	4.37384	10.1867	3.91514	8.29043
	4.39116	10.1786	3.96224	8.49293
	4.38031	10.0655	3.97488	8.60503
	4.35355	9.94976	3.99865	8.67182
	4.31572	9.88824	4.06657	8.64983
	4.27945	9.87162	4.17115	8.50446
	4.25432	9.9019	4.26319	8.38546
	4.23838	9.96908	4.27894	8.34359
	4.23949	10.0269	4.21343	8.27543
	4.27165	10.0697	4.14866	8.20431
	4.3107	10.1177	4.13767	8.23702
	4.32493	10.1545	4.16449	8.2978
	4.31299	10.1408	4.18997	8.29908
	4.29553	10.1018	4.19758	8.30494
	4.28932	10.0811	4.18956	8.31915
	4.29439	10.0704	4.20016	8.26227
	4.30557	10.0617	4.24243	8.20846
	4.3153	10.0915	4.24782	8.27237
	4.32699	10.1496	4.16115	8.36477
	4.34607	10.1959	4.03065	8.38301
	4.37096	10.239	3.96443	8.35636
	4.38146	10.2778	4.01019	8.28033
	4.34885	10.2754	4.11484	8.11393
	4.28036	10.2547	4.17805	7.9595
	4.20909	10.2586	4.1476	7.88336
	4.16057	10.2787	4.0945	7.79109
	4.15242	10.2803	4.12178	7.6752
	4.18942	10.2756	4.24056	7.68982
	4.24242	10.2561	4.34414	7.84297
	4.2827	10.2008	4.34477	7.99888
	4.31937	10.131	4.26545	8.11368
	4.35684	10.0955	4.2029	8.19763
	4.37751	10.0905	4.23037	8.18968
	4.36095	10.0886	4.32366	8.13391
	4.31262	10.118	4.38831	8.1624
	4.251	10.187	4.35068	8.25026
	4.2004	10.2524	4.26203	8.271
	4.18186	10.2807	4.23473	8.27933
	4.19315	10.2739	4.32093	8.35135
	4.20949	10.2042	4.47246	8.35108
	4.21887	10.0932	4.59764	8.32932
	4.23867	10.0333	4.64092	8.31305
	4.26418	10.0662	4.61756	8.26473
	4.27579	10.1527	4.59225	8.1425
	4.26976	10.252	4.59121	8.07193
	4.25031	10.3328	4.58545	8.09619
	4.22352	10.3417	4.54089	8.09863
	4.21686	10.2776	4.47233	8.06657
	4.23927	10.2089	4.42005	8.09669
	4.23707	10.1585	4.39395	8.13075
	4.20977	10.1134	4.38138	8.07947
	4.16816	10.0957	4.3567	8.0322
	4.15057	10.1465	4.3216	8.06641
	4.17038	10.2142	4.31475	8.09799
	4.21893	10.2463	4.38684	8.12417
	4.26059	10.2648	4.49699	8.22558
	4.26453	10.2824	4.5458	8.33707
	4.25432	10.2824	4.49675	8.35371
	4.27052	10.2956	4.39708	8.36274
	4.31372	10.3426	4.30908	8.39649
	4.35558	10.363	4.27318	8.35751
	4.38718	10.3376	4.28556	8.27823
	4.39787	10.323	4.29162	8.28112
	4.37554	10.3315	4.27622	8.31893
	4.34048	10.3248	4.29103	8.35091
	4.31796	10.3229	4.38189	8.46777
	4.3049	10.3385	4.51808	8.62192
	4.28895	10.3285	4.61558	8.64274
	4.28046	10.2805	4.62403	8.56572
	4.27857	10.2361	4.55177	8.54389
	4.27752	10.2106	4.47477	8.56932
	4.28223	10.2003	4.47491	8.62197
	4.28766	10.2402	4.55311	8.74927
	4.28023	10.343	4.62902	8.88282
	4.26092	10.434	4.6463	8.915
	4.2525	10.4697	4.63001	8.95095
	4.26217	10.4575	4.6161	9.06819
	4.28514	10.3889	4.63369	9.12032
	4.32219	10.265	4.67675	9.02511
	4.37497	10.1693	4.71222	8.89417
	4.43033	10.143	4.71432	8.75149
	4.46911	10.1423	4.70492	8.55065
	4.49188	10.1392	4.72435	8.43751
	4.49322	10.1342	4.77799	8.46652
	4.46537	10.1173	4.83535	8.50657
	4.42205	10.1167	4.85956	8.49049
	4.39237	10.1845	4.85433	8.47095
	4.37733	10.2837	4.82324	8.43596
	4.36001	10.3402	4.76543	8.35564
	4.34242	10.3542	4.68996	8.33309
	4.33742	10.3772	4.61531	8.39304
	4.35797	10.4101	4.57726	8.39517
	4.40587	10.4234	4.60937	8.33515
	4.45686	10.4296	4.69593	8.34735
	4.46219	10.4288	4.75319	8.42622
	4.40236	10.4035	4.73767	8.48357
	4.31066	10.3817	4.68831	8.55641
	4.23709	10.383	4.66405	8.63827
	4.20223	10.3694	4.70238	8.61219
	4.19556	10.3341	4.79775	8.50249
	4.20124	10.3362	4.89809	8.44553
	4.21127	10.3675	4.93956	8.42546
	4.23675	10.3869	4.92894	8.42128
	4.28496	10.3777	4.90381	8.52905
	4.33145	10.3405	4.88643	8.73923
	4.34257	10.2696	4.87896	8.87804
	4.3149	10.2134	4.88688	8.92294
	4.2689	10.2371	4.8966	8.97344
	4.21685	10.3121	4.8814	9.01353
	4.18708	10.3597	4.8615	8.99374
	4.20489	10.3635	4.86646	9.00552
	4.25437	10.3655	4.88999	9.03227
	4.29583	10.3738	4.91275	8.94075
	4.30885	10.3952	4.92647	8.78092
	4.299	10.439	4.91132	8.68294
	4.27732	10.4576	4.88221	8.58281
	4.26232	10.4207	4.90769	8.42613
	4.26702	10.3795	5.00463	8.36764
	4.28217	10.382	5.11033	8.46806
	4.28668	10.3823	5.15731	8.61882
	4.28142	10.3436	5.12599	8.78123
	4.27642	10.2997	5.02314	8.92971
	4.26969	10.2616	4.89584	8.93665
	4.26306	10.2324	4.81675	8.83308
	4.26241	10.2402	4.81006	8.81848
	4.26792	10.2916	4.84988	8.93469
	4.2748	10.3204	4.91038	9.02134
	4.28773	10.3057	4.97809	9.03278
	4.29646	10.2908	4.9979	8.96776
	4.28448	10.3035	4.94296	8.78643
	4.27137	10.3371	4.8542	8.5795
	4.28689	10.4052	4.79798	8.52916
	4.32272	10.4877	4.80528	8.59025
	4.35106	10.5103	4.85719	8.60613
	4.37099	10.4557	4.90069	8.5884
	4.38076	10.3763	4.89268	8.60214
	4.36988	10.2919	4.87216	8.585
	4.33764	10.2133	4.89332	8.54989
	4.29484	10.214	4.95108	8.58125
	4.25019	10.3156	4.99449	8.64075
	4.22191	10.4385	4.99394	8.67671
	4.24044	10.5165	4.96583	8.78919
	4.29419	10.5366	4.96275	8.99798
	4.33803	10.4981	4.994	9.14631
	4.3531	10.435	5.03551	9.18894
	4.36064	10.4113	5.05039	9.21032
	4.37146	10.4067	5.01871	9.20145
	4.37775	10.3427	4.95022	9.14042
	4.3711	10.2355	4.88533	9.12585
	4.33489	10.1578	4.85718	9.14816
	4.27357	10.1216	4.87424	9.06117
	4.2222	10.1005	4.90917	8.89162
	4.20587	10.108	4.93406	8.80778
	4.20237	10.1273	4.93289	8.79911
	4.19055	10.1507	4.93431	8.77765
	4.1793	10.2152	4.97038	8.77346
	4.1738	10.3259	5.02238	8.78216
	4.17413	10.3942	5.05171	8.706
	4.18792	10.3875	5.05706	8.61386
	4.21195	10.3781	5.05659	8.62592
	4.21617	10.3938	5.03777	8.69615
	4.19273	10.4348	4.99128	8.76159
	4.16502	10.5221	4.92128	8.88076
	4.15183	10.6301	4.84916	9.00704
	4.15811	10.6706	4.81935	9.01395
	4.1776	10.6226	4.87011	8.95248
	4.18316	10.5473	4.97551	8.94226
	4.15204	10.4581	5.05777	8.93806
	4.11811	10.3492	5.08523	8.89982
	4.1237	10.249	5.06643	8.92142
	4.16031	10.1875	5.02752	8.98763
	4.19214	10.164	5.0025	8.98262
	4.2016	10.1964	4.99907	8.94249
	4.18924	10.2977	4.97291	8.93462
	4.16519	10.3921	4.88394	8.8866
	4.14807	10.4144	4.76588	8.81818
	4.1384	10.3955	4.67016	8.86699
	4.13276	10.3936	4.62085	9.00479
	4.14232	10.4056	4.62351	9.09239
	4.17607	10.4347	4.68254	9.16806
	4.21575	10.479	4.75759	9.27686
	4.23547	10.5017	4.81902	9.32032
	4.23613	10.4919	4.88026	9.277
	4.22984	10.5055	4.94257	9.23922
	4.22112	10.563	4.99148	9.1612
	4.205	10.6093	5.0297	8.99027
	4.18395	10.623	5.0634	8.83619
	4.15609	10.6387	5.05798	8.78312
	4.1214	10.6549	4.99966	8.74684
	4.10152	10.6447	4.91472	8.71576
	4.11404	10.6267	4.81537	8.76895
	4.14721	10.6029	4.71465	8.84811
	4.17273	10.5398	4.64781	8.8547
	4.18551	10.4641	4.6414	8.84669
	4.19728	10.4341	4.67317	8.87577
	4.21569	10.4473	4.71977	8.88782
	4.23802	10.4776	4.7628	8.90078
	4.25187	10.5359	4.78835	8.94089
	4.23521	10.6064	4.8081	8.8973
	4.18204	10.6642	4.84578	8.7374
	4.13348	10.7408	4.90406	8.62217
	4.11986	10.8295	4.9405	8.61696
	4.13043	10.8578	4.93545	8.61942
	4.15232	10.7807	4.9053	8.60009
	4.18793	10.6639	4.88201	8.61293
	4.22209	10.5715	4.88115	8.6153
	4.24322	10.5306	4.91518	8.58511
	4.26662	10.5547	4.98536	8.61504
	4.28922	10.6124	5.07036	8.71167
	4.29722	10.6226	5.16126	8.7388
	4.2978	10.5676	5.25918	8.71174
	4.29853	10.5286	5.35373	8.72937
	4.28702	10.5445	5.42019	8.75311
	4.27136	10.6008	5.44128	8.74491
	4.2718	10.6879	5.41688	8.79474
	4.27622	10.7699	5.37857	8.89138
	4.26853	10.789	5.37004	8.92766
	4.25363	10.7417	5.38685	8.93697
	4.24205	10.6841	5.38668	8.97814
	4.23277	10.6067	5.34529	8.97062
	4.23987	10.5006	5.29796	8.8952
	4.275	10.4289	5.29063	8.88358
	4.31116	10.4251	5.32576	8.95361
	4.32225	10.4575	5.37333	8.99922
	4.32253	10.5051	5.39509	9.03378
	4.33312	10.5813	5.37142	9.10452
	4.34482	10.6382	5.33115	9.1154
	4.34923	10.6298	5.33731	9.02763
	4.33729	10.5747	5.3958	8.95413
	4.30266	10.5063	5.44046	8.9042
	4.27419	10.4329	5.42016	8.80333
	4.28596	10.3966	5.35025	8.79261
	4.3245	10.4383	5.27516	8.90264
	4.35518	10.5236	5.24343	8.99732
	4.37419	10.6048	5.28254	9.00226
	4.38172	10.6788	5.35747	8.99526
	4.37569	10.7376	5.41313	8.94511
	4.37289	10.754	5.42934	8.82176
	4.38922	10.7494	5.4335	8.76103
	4.41155	10.7509	5.44405	8.8389
	4.41937	10.7267	5.45564	8.94178
	4.41929	10.684	5.45938	9.02704
	4.41769	10.6845	5.44153	9.11601
	4.41266	10.7426	5.42675	9.11643
	4.41223	10.8048	5.47191	9.00272
	4.42744	10.8479	5.59362	8.94172
	4.44096	10.8727	5.7038	8.98125
	4.42569	10.85	5.71294	8.96489
	4.38707	10.7873	5.63779	8.86129
	4.34897	10.7476	5.54696	8.78295
	4.34017	10.7488	5.49709	8.74763
	4.37648	10.7501	5.4988	8.75764
	4.44062	10.7667	5.52873	8.89154
	4.48109	10.8099	5.55417	9.08567
	4.46839	10.8457	5.59829	9.18144
	4.42031	10.8612	5.6883	9.1897
	4.37344	10.8844	5.78872	9.19528
	4.35247	10.893	5.83327	9.12782
	4.36238	10.8515	5.8036	8.96282
	4.39907	10.7954	5.74022	8.81271
	4.43977	10.7709	5.69077	8.71671
	4.45593	10.7756	5.68618	8.61475
	4.44047	10.8004	5.70138	8.54894
	4.40902	10.8484	5.6653	8.56513
	4.37052	10.8718	5.54717	8.57922
	4.33649	10.833	5.41599	8.54685
	4.33442	10.7852	5.37411	8.55061
	4.364	10.7667	5.44858	8.57345
	4.39956	10.7579	5.58956	8.54281
	4.4273	10.7549	5.70756	8.55547
	4.44021	10.7819	5.7373	8.70274
	4.42022	10.8148	5.69323	8.87205
	4.3727	10.8301	5.64942	8.95812
	4.33173	10.841	5.6459	9.01067
	4.31338	10.8293	5.65932	8.96328
	4.31491	10.7688	5.67481	8.7981
	4.31806	10.6993	5.70371	8.67912
	4.30064	10.6915	5.76694	8.72992
	4.25294	10.7317	5.861	8.85303
	4.20818	10.7895	5.95089	8.9478
	4.20452	10.8747	5.96631	9.01378
	4.22975	10.9694	5.89339	8.98809
	4.25058	11.0173	5.82941	8.83095
	4.26164	11.0117	5.8743	8.71448
	4.27507	10.9853	6.00414	8.74451
	4.29504	10.9238	6.10684	8.81112
	4.33673	10.8318	6.11314	8.82483
	4.38903	10.7748	6.02832	8.84421
	4.40834	10.7734	5.91012	8.84352
	4.38894	10.7842	5.8216	8.79154
	4.36801	10.7882	5.7809	8.7818
	4.36629	10.7973	5.76269	8.81572
	4.37224	10.7855	5.75907	8.75449
	4.38035	10.7628	5.78952	8.62849
	4.3812	10.7889	5.8425	8.5838
	4.36651	10.8645	5.89498	8.5742
	4.35172	10.915	5.92394	8.51364
	4.35862	10.9171	5.90566	8.48653
	4.38602	10.8981	5.84007	8.54111
	4.41486	10.8461	5.77994	8.61009
	4.44098	10.7628	5.79712	8.70123
	4.45142	10.7002	5.87257	8.83296
	4.42493	10.6874	5.93349	8.87983
	4.36596	10.7009	5.94398	8.79583
	4.31171	10.7572	5.94195	8.72288
	4.28483	10.8485	5.96232	8.70551
	4.2902	10.9018	6.00063	8.67668
	4.33028	10.8915	6.00688	8.68231
	4.37481	10.865	5.92491	8.78608
	4.3868	10.833	5.78279	8.89097
	4.36976	10.7882	5.68247	8.97675
	4.35575	10.773	5.70109	9.14519
	4.35304	10.7999	5.79882	9.33928
	4.35117	10.8279	5.89456	9.36654
	4.34797	10.847	5.94251	9.23873
	4.33945	10.8791	5.95552	9.07893
	4.32483	10.8982	5.98458	8.92032
	4.3172	10.8769	6.04188	8.81413
	4.33472	10.8749	6.09229	8.83441
	4.37412	10.9259	6.09217	8.89656
	4.42265	10.9919	6.06433	8.87294
	4.47409	11.04	6.06789	8.83429
	4.51281	11.0748	6.11594	8.86877
	4.51011	11.0805	6.16281	8.88778
	4.46027	11.0609	6.1572	8.84901
	4.3878	11.0754	6.10661	8.82993
	4.30477	11.1022	6.06214	8.79639
	4.22933	11.0613	6.08604	8.68639
	4.18737	10.9564	6.17256	8.61701
	4.18172	10.8606	6.23962	8.64286
	4.1978	10.801	6.21267	8.62829
	4.22708	10.7892	6.12118	8.55119
	4.25484	10.8528	6.04169	8.51953
	4.25606	10.9629	6.00857	8.52288
	4.22441	11.0561	6.01507	8.49421
	4.16808	11.1138	6.0228	8.49971
	4.10819	11.1412	5.99496	8.54799
	4.07324	11.1179	5.94718	8.55817
	4.08335	11.058	5.93782	8.56403
	4.12666	11.0253	5.97621	8.64022
	4.16351	11.0251	6.01472	8.66922
	4.17661	11.0205	6.04169	8.54447
	4.18151	11.0195	6.0719	8.38486
	4.19834	11.0368	6.10347	8.30291
	4.22809	11.0228	6.13214	8.26484
	4.26789	10.9578	6.16002	8.28098
	4.29915	10.8869	6.1522	8.35975
	4.30284	10.849	6.09129	8.37492
	4.30178	10.8415	6.0305	8.29585
	4.32714	10.8532	6.02014	8.29806
	4.37776	10.8652	6.04437	8.4239
	4.42618	10.8386	6.05688	8.51584
	4.45453	10.8106	6.03351	8.51868
	4.45641	10.8681	5.95356	8.47563
	4.44328	11.0122	5.8534	8.35352
	4.43173	11.1457	5.81036	8.17959
	4.41674	11.2159	5.85314	8.0836
	4.37499	11.2378	5.92858	8.05307
	4.28607	11.2117	5.98699	7.99887
	4.17764	11.1511	6.02844	7.97923
	4.1046	11.1093	6.05808	8.08367
	4.09738	11.0944	6.08755	8.22952
	4.14528	11.074	6.11621	8.3388
	4.21565	11.0668	6.11729	8.42209
	4.27217	11.0828	6.07351	8.43367
	4.30126	11.0853	6.03518	8.33854
	4.3239	11.0769	6.06953	8.28474
	4.33195	11.098	6.15336	8.34447
	4.29018	11.1459	6.21435	8.35727
	4.20139	11.1888	6.20531	8.22856
	4.12142	11.2504	6.14154	8.08556
	4.09867	11.3203	6.0824	8.00215
	4.13734	11.3436	6.09466	7.95171
	4.20996	11.3183	6.17321	7.93991
	4.2667	11.2968	6.23171	7.92693
	4.27516	11.2803	6.20161	7.83458
	4.2508	11.239	6.0936	7.75466
	4.23926	11.1976	5.98691	7.84521
	4.25063	11.1584	5.93243	8.03142
	4.26273	11.1083	5.93018	8.12899
	4.26654	11.0799	5.94897	8.15533
	4.26268	11.1027	5.99156	8.18864
	4.24812	11.1257	6.10568	8.16319
	4.24002	11.125	6.30197	8.06412
	4.25048	11.1569	6.49171	7.95202
	4.24304	11.2121	6.55034	7.79322
	4.20429	11.2374	6.46188	7.5856
	4.17452	11.2426	6.3254	7.51692
	4.1781	11.2698	6.25599	7.64139
	4.19732	11.2949	6.30008	7.77656
	4.20277	11.2984	6.40942	7.82603
	4.17531	11.3122	6.49087	7.83199
	4.12545	11.3168	6.4861	7.76873
	4.10388	11.2794	6.43399	7.67055
	4.13497	11.2208	6.399	7.68787
	4.18564	11.1816	6.3908	7.79689
	4.2163	11.1494	6.36711	7.81045
	4.22511	11.1221	6.30518	7.73038
	4.22454	11.1138	6.22652	7.69041
	4.21669	11.0821	6.17517	7.67945
	4.2164	11.0008	6.19767	7.65009
	4.22966	10.9396	6.28618	7.66864
	4.24257	10.9639	6.38174	7.71692
	4.24067	11.0286	6.4368	7.69272
	4.23913	11.0844	6.45708	7.65235
	4.24451	11.1294	6.44072	7.67564
	4.24419	11.1467	6.39029	7.66827
	4.24366	11.1373	6.33608	7.60549
	4.24881	11.1608	6.29103	7.63202
	4.25586	11.2406	6.25045	7.74869
	4.26013	11.3109	6.23697	7.8511
	4.25438	11.3144	6.28594	7.92301
	4.21985	11.2632	6.36292	7.95296
	4.16965	11.17	6.39372	7.81724
	4.13456	11.0559	6.35416	7.5644
	4.14101	10.9782	6.28555	7.40845
	4.18553	10.9619	6.26171	7.40355
	4.24149	10.9637	6.33201	7.45593
	4.28301	10.9748	6.47097	7.53857
	4.29072	11.0219	6.57561	7.60428
	4.26757	11.067	6.59689	7.54629
	4.24167	11.0447	6.5866	7.42894
	4.23527	10.9882	6.5895	7.42147
	4.23896	10.9564	6.58047	7.48527
	4.23494	10.9615	6.52857	7.49019
	4.23836	11	6.44351	7.45401
	4.26559	11.0493	6.35805	7.42401
	4.31111	11.056	6.33661	7.37693
	4.35659	11.0113	6.40042	7.3743
	4.38242	10.9904	6.49508	7.47845
	4.3741	11.0164	6.54289	7.57629
	4.34017	11.0395	6.5387	7.57962
	4.31092	11.0379	6.53151	7.59744
	4.29881	11.0288	6.5512	7.69512
	4.28726	10.999	6.58565	7.7522
	4.2635	10.9424	6.57789	7.73615
	4.24636	10.9072	6.48554	7.73288
	4.24879	10.8991	6.3497	7.74993
	4.25992	10.8904	6.27401	7.75422
	4.27354	10.9004	6.3014	7.80092
	4.28226	10.942	6.35935	7.83694
	4.27844	10.9567	6.36333	7.72691
	4.27807	10.9111	6.31869	7.54496
	4.30074	10.8613	6.30332	7.44554
	4.32193	10.8274	6.36313	7.38726
	4.32828	10.8169	6.47719	7.32151
	4.34162	10.8638	6.56536	7.34025
	4.36029	10.9626	6.56574	7.43175
	4.36662	11.0407	6.5108	7.45546
	4.36777	11.0625	6.48114	7.43375
	4.37837	11.0619	6.49858	7.47075
	4.38963	11.0441	6.50852	7.53179
	4.39612	10.9967	6.47007	7.56918
	4.39509	10.9314	6.37995	7.62357
	4.37857	10.8601	6.28407	7.63718
	4.34766	10.7678	6.24978	7.49569
	4.32214	10.6848	6.2924	7.2835
	4.30998	10.6778	6.33182	7.13515
	4.3	10.7261	6.28958	7.03003
	4.30319	10.7676	6.18497	6.97591
	4.32064	10.8022	6.08462	7.08803
	4.31282	10.8602	6.03576	7.29625
	4.25359	10.913	6.0346	7.40934
	4.18031	10.9254	6.02792	7.43944
	4.13683	10.895	5.96691	7.48119
	4.12521	10.8071	5.88903	7.47785
	4.13802	10.6862	5.88506	7.4157
	4.15425	10.611	5.97107	7.36939
	4.15307	10.6162	6.07869	7.30818
	4.1405	10.648	6.13577	7.21957
	4.13398	10.682	6.14597	7.24969
	4.12929	10.7422	6.15907	7.41343
	4.1221	10.8167	6.2108	7.49532
	4.12606	10.8591	6.27584	7.41014
	4.13536	10.8662	6.27285	7.29161
	4.12778	10.8401	6.15587	7.18927
	4.09809	10.7643	5.97878	7.10414
	4.05707	10.6811	5.84328	7.13064
	4.02303	10.6567	5.78023	7.26884
	3.99494	10.681	5.76984	7.35881
	3.99628	10.7095	5.79078	7.37355
	4.04464	10.7467	5.83402	7.40792
	4.11325	10.7772	5.90065	7.4192
	4.15539	10.7692	5.99035	7.354
	4.15142	10.7563	6.07146	7.26917
	4.10483	10.7655	6.0845	7.15217
	4.04369	10.7559	6.02148	6.93057
	4.00563	10.6917	5.9428	6.73185
	3.98919	10.6148	5.92104	6.70649
	3.96401	10.557	5.97366	6.75882
	3.92664	10.5297	6.05265	6.74803
	3.91116	10.5646	6.09786	6.72863
	3.93477	10.6441	6.08334	6.75876
	3.98676	10.6947	6.05271	6.80488
	4.03784	10.6941	6.06017	6.89612
	4.06518	10.7116	6.09861	7.03489
	4.06053	10.749	6.09916	7.08438
	4.03619	10.745	6.04177	7.01235
	4.01344	10.6945	5.98524	6.96944
	3.99365	10.6368	5.98434	6.966
	3.97258	10.6004	6.0456	6.87867
	3.9593	10.6259	6.1223	6.77396
	3.9612	10.728	6.15364	6.76302
	3.96224	10.8143	6.117	6.78073
	3.95529	10.8142	6.07677	6.77243
	3.94731	10.7579	6.09496	6.80915
	3.94271	10.6764	6.16556	6.88014
	3.94964	10.5755	6.24714	6.91423
	3.97873	10.4854	6.29699	6.95864
	4.01827	10.4574	6.27751	7.02264
	4.03884	10.4855	6.19026	6.98365
	4.02812	10.5426	6.09914	6.82445
	3.99834	10.6181	6.04797	6.67986
	3.97548	10.6746	6.02402	6.577
	3.97669	10.6625	6.03009	6.48862
	3.99088	10.5971	6.10263	6.50968
	3.99154	10.5301	6.24571	6.66384
	3.95928	10.4542	6.40841	6.78009
	3.91785	10.3627	6.52095	6.78301
	3.89337	10.3008	6.50661	6.77989
	3.87851	10.3012	6.37799	6.78915
	3.85406	10.3294	6.27435	6.76023
	3.82759	10.3619	6.3169	6.75672
	3.81886	10.4111	6.46038	6.78172
	3.82835	10.4499	6.56942	6.73434
	3.85298	10.447	6.56507	6.65872
	3.87511	10.423	6.45014	6.68253
	3.87809	10.3962	6.3027	6.74164
	3.87088	10.3613	6.20567	6.71485
	3.87162	10.3358	6.17827	6.63397
	3.86927	10.3238	6.1758	6.55281
	3.84386	10.2695	6.17549	6.47162
	3.81112	10.1574	6.19269	6.47853
	3.8032	10.0762	6.23347	6.63322
	3.82786	10.081	6.29465	6.77519
	3.86759	10.1186	6.36687	6.76628
	3.91394	10.1541	6.43042	6.70591
	3.9574	10.1882	6.46058	6.67597
	3.97737	10.2128	6.46678	6.59704
	3.9725	10.2458	6.4611	6.47284
	3.93899	10.3217	6.41909	6.37068
	3.86077	10.395	6.33584	6.2701
	3.75631	10.3919	6.24905	6.20942
	3.68677	10.3336	6.2109	6.31382
	3.67506	10.2612	6.23087	6.51768
	3.70072	10.1621	6.28761	6.61733
	3.74043	10.0321	6.32939	6.59963
	3.7705	9.91663	6.32764	6.57069
	3.77812	9.8356	6.30991	6.52195
	3.78322	9.7963	6.31678	6.43944
	3.80452	9.82669	6.35771	6.39528
	3.8148	9.90587	6.39773	6.3929
	3.79235	9.95726	6.40908	6.38379
	3.75713	9.94612	6.38518	6.44702
	3.74181	9.91017	6.34452	6.60203
	3.74975	9.85872	6.30291	6.67385
	3.77185	9.79484	6.26461	6.61517
	3.79778	9.76278	6.22201	6.59926
	3.79848	9.76039	6.1704	6.67389
	3.76254	9.74448	6.12965	6.72648
	3.71453	9.71813	6.12509	6.75721
	3.67406	9.71467	6.15823	6.7678
	3.64427	9.68756	6.19778	6.6706
	3.64172	9.61515	6.21975	6.50869
	3.67591	9.55709	6.22076	6.42982
	3.72048	9.53983	6.20742	6.40032
	3.75445	9.54155	6.20215	6.31253
	3.7629	9.55787	6.21546	6.22583
	3.73126	9.60302	6.23017	6.20691
	3.66798	9.63223	6.22647	6.20497
	3.61135	9.61451	6.23149	6.23609
	3.57672	9.58214	6.26153	6.36761
	3.55235	9.57296	6.28043	6.49347
	3.53644	9.5898	6.25144	6.4952
	3.54052	9.62879	6.16273	6.4712
	3.574	9.67748	6.02034	6.49947
	3.62522	9.68876	5.87089	6.50724
	3.68061	9.65453	5.79898	6.4992
	3.70959	9.62274	5.82662	6.53985
	3.69931	9.59405	5.91297	6.58054
	3.67473	9.52387	6.01132	6.5522
	3.66805	9.43571	6.08829	6.55955
	3.67207	9.38495	6.12013	6.58404
	3.65983	9.36791	6.13164	6.48694
	3.62851	9.36415	6.16364	6.31718
	3.59	9.36901	6.20166	6.22198
	3.56194	9.35726	6.22117	6.17783
	3.56329	9.28612	6.23329	6.14532
	3.5846	9.18125	6.25517	6.17858
	3.59353	9.1122	6.2675	6.24574
	3.57641	9.10512	6.24625	6.24227
	3.55733	9.15825	6.19806	6.19944
	3.5583	9.26302	6.13752	6.18591
	3.57893	9.35581	6.09832	6.13376
	3.60218	9.36031	6.10985	6.01928
	3.61881	9.30629	6.16134	5.94684
	3.6187	9.2532	6.19434	5.94397
	3.5924	9.20722	6.18989	5.92208
	3.55976	9.17649	6.17643	5.92543
	3.54844	9.18318	6.16446	5.97662
	3.55742	9.20652	6.16128	5.95699
	3.56829	9.21459	6.17829	5.85965
	3.56898	9.23437	6.20869	5.82341
	3.54646	9.27097	6.22448	5.85822
	3.4992	9.28482	6.23315	5.85799
	3.48588	9.25673	6.24941	5.84764
	3.49655	9.18826	6.26095	5.88468
	3.50508	9.06884	6.24839	5.92333
	3.49677	8.92463	6.20861	5.97349
	3.48632	8.83567	6.16289	6.10662
	3.4796	8.81585	6.13589	6.23823
	3.47616	8.82206	6.13471	6.2288
	3.48396	8.84254	6.12997	6.15112
	3.4975	8.89821	6.10375	6.10149
	3.4922	8.96915	6.09434	6.00471
	3.46659	9.04067	6.14611	5.8519
	3.44862	9.13118	6.24568	5.76754
	3.43542	9.20325	6.33381	5.75271
	3.4178	9.1991	6.37829	5.75
	3.40554	9.12632	6.37732	5.81782
	3.40219	9.04589	6.34611	5.92431
	3.40218	8.97778	6.30603	5.92609
	3.42366	8.91997	6.27943	5.83267
	3.46811	8.87732	6.26515	5.803
	3.49797	8.82764	6.24468	5.82399
	3.50301	8.76716	6.21459	5.80961
	3.50136	8.73458	6.185	5.80555
	3.50348	8.7442	6.17574	5.81878
	3.50949	8.73847	6.1957	5.78259
	3.52551	8.7011	6.23736	5.74221
	3.53825	8.69562	6.25868	5.76234
	3.52719	8.7465	6.24127	5.73427
	3.49856	8.82661	6.22731	5.59484
	3.46608	8.90522	6.24965	5.49485
	3.42742	9.02381	6.28065	5.51577
	3.38371	9.08824	6.28194	5.5583
	3.36403	9.07274	6.26147	5.61016
	3.37832	9.01737	6.23903	5.72763
	3.40051	8.93335	6.24445	5.84038
	3.41674	8.80947	6.31088	5.89705
	3.42464	8.69224	6.43303	5.99238
	3.41452	8.6403	6.56384	6.08554
	3.38841	8.65001	6.65135	6.04403
	3.36779	8.70331	6.6827	5.9292
	3.3452	8.77546	6.66895	5.86562
	3.30768	8.8152	6.6531	5.818
	3.26942	8.80953	6.66762	5.77019
	3.2494	8.83602	6.70107	5.79476
	3.2551	8.9322	6.71386	5.84156
	3.28729	9.01578	6.69005	5.80934
	3.33193	9.01417	6.65151	5.76795
	3.34934	8.94331	6.60561	5.79988
	3.31803	8.8541	6.57458	5.82201
	3.26497	8.79733	6.58925	5.82439
	3.24262	8.81463	6.65031	5.91449
	3.26221	8.86625	6.70656	6.03299
	3.29187	8.86704	6.7125	6.04496
	3.30781	8.82587	6.65033	6.01358
	3.30651	8.80698	6.52496	6.00591
	3.30068	8.81613	6.37607	5.94514
	3.31287	8.82437	6.25302	5.85778
	3.34174	8.84007	6.18946	5.87019
	3.34621	8.85178	6.1882	5.94838
	3.30016	8.85301	6.23112	5.98481
	3.22846	8.87051	6.28233	6.00847
	3.17831	8.92607	6.30513	6.04082
	3.18306	8.95868	6.29876	6.01509
	3.23492	8.92462	6.29061	5.9822
	3.29442	8.86432	6.31177	6.0412
	3.31599	8.8023	6.35242	6.0981
	3.29684	8.73714	6.38084	6.01955
	3.27407	8.68892	6.37027	5.88606
	3.26904	8.66434	6.32265	5.78628
	3.25936	8.62352	6.27286	5.68574
	3.22341	8.56198	6.26045	5.62608
	3.17587	8.53526	6.275	5.65828
	3.14024	8.54468	6.26308	5.67649
	3.13683	8.55338	6.23603	5.62914
	3.16292	8.56648	6.23703	5.64769
	3.17627	8.59575	6.25834	5.74784
	3.14369	8.62534	6.2538	5.79325
	3.09767	8.66514	6.20456	5.77605
	3.08665	8.7443	6.131	5.78677
	3.11699	8.83412	6.0844	5.79397
	3.16515	8.89849	6.11227	5.74544
	3.19552	8.944	6.19029	5.68729
	3.18795	8.97576	6.24537	5.60287
	3.16313	8.9462	6.25221	5.44753
	3.16769	8.83816	6.24728	5.3438
	3.21207	8.6953	6.25314	5.42348
	3.2446	8.54854	6.27013	5.58376
	3.2277	8.4145	6.28812	5.68109
	3.17116	8.32842	6.27269	5.75962
	3.11461	8.31882	6.20548	5.83588
	3.08616	8.35611	6.13166	5.85416
	3.09685	8.41188	6.11245	5.87578
	3.12026	8.48816	6.13054	5.94777
	3.12063	8.55668	6.14781	5.94668
	3.10601	8.56936	6.15735	5.83625
	3.09718	8.53961	6.16097	5.74758
	3.0887	8.50386	6.1702	5.71322
	3.0749	8.45852	6.20396	5.69611
	3.07234	8.43048	6.25967	5.74983
	3.07916	8.46069	6.28947	5.86352
	3.08251	8.50615	6.26549	5.86779
	3.08345	8.49462	6.19043	5.72776
	3.07952	8.44563	6.09341	5.61201
	3.05341	8.40192	6.02709	5.58906
	3.00066	8.35726	6.03054	5.60012
	2.95032	8.3124	6.08626	5.66348
	2.92435	8.27755	6.15183	5.77023
	2.92073	8.22619	6.22505	5.79574
	2.93882	8.13825	6.31894	5.73323
	2.97749	8.06937	6.40785	5.67733
	3.01835	8.05707	6.42891	5.58464
	3.04685	8.09307	6.34292	5.41565
	3.07423	8.16816	6.17418	5.31781
	3.09761	8.23283	5.98236	5.37414
	3.11361	8.22517	5.84112	5.46739
	3.13715	8.14624	5.7723	5.55178
	3.17633	8.10893	5.75245	5.68843
	3.20289	8.14944	5.75279	5.83084
	3.19481	8.20175	5.7715	5.9136
	3.15639	8.27815	5.8289	6.02571
	3.09905	8.35417	5.90973	6.18329
	3.05037	8.4107	5.96471	6.24695
	3.03927	8.44182	5.94753	6.20246
	3.06491	8.4724	5.87225	6.14638
	3.09291	8.4797	5.79224	6.05725
	3.0996	8.44307	5.76513	5.92415
	3.08705	8.39393	5.80456	5.85054
	3.05806	8.33836	5.87187	5.81307
	3.0184	8.23293	5.92547	5.69783
	2.98021	8.09083	5.96261	5.6021
	2.94834	7.99011	5.9923	5.68568
	2.91817	7.94803	6.00746	5.86722
	2.9105	7.95431	6.00986	6.00949
	2.94539	8.0065	5.99805	6.12324
	3.00194	8.07916	5.97295	6.18608
	3.04584	8.11622	5.97252	6.14703
	3.05813	8.12778	6.02549	6.11441
	3.03672	8.16867	6.09428	6.164
	2.99299	8.23018	6.11636	6.16364
	2.9542	8.26186	6.10194	6.01944
	2.92761	8.24308	6.09073	5.83731
	2.90891	8.18756	6.09601	5.67513
	2.89399	8.11544	6.10864	5.51821
	2.88213	8.06099	6.12336	5.44198
	2.87385	8.04324	6.13132	5.48798
	2.87277	8.02272	6.13656	5.53649
	2.89003	7.98285	6.16872	5.55195
	2.9208	7.98374	6.22663	5.6402
	2.93553	8.06834	6.28517	5.75425
	2.90969	8.16823	6.32857	5.77599
	2.86407	8.19769	6.35395	5.77547
	2.83096	8.14501	6.32552	5.82648
	2.81385	8.03403	6.23513	5.85079
	2.8119	7.91623	6.13015	5.83786
	2.82494	7.86878	6.05417	5.84277
	2.84987	7.8998	6.02608	5.80632
	2.88871	7.9326	6.05454	5.69966
	2.94216	7.93823	6.12342	5.65636
	2.98355	7.94906	6.17681	5.74117
	2.98711	7.97261	6.18263	5.82743
	2.97018	7.98909	6.13577	5.83581
	2.96477	8.00438	6.04169	5.82043
	2.97584	7.9978	5.94113	5.77879
	2.97447	7.94912	5.89956	5.71816
	2.95107	7.91884	5.93826	5.73659
	2.91377	7.96071	6.00243	5.83405
	2.87633	8.02992	6.04174	5.86863
	2.86314	8.0682	6.04681	5.84362
	2.88049	8.09023	6.03468	5.87369
	2.8932	8.09341	6.01074	5.91915
	2.88246	8.0497	5.96569	5.90014
	2.88141	7.97428	5.90054	5.88915
	2.90462	7.88379	5.82913	5.91394
	2.9242	7.78629	5.79206	5.89581
	2.92374	7.72414	5.80809	5.8684
	2.90647	7.74889	5.86738	5.89286
	2.88194	7.82118	5.94421	5.8818
	2.88276	7.86055	6.00466	5.78054
	2.93261	7.84547	6.01087	5.7042
	2.9932	7.80313	5.94361	5.7009
	3.01232	7.76665	5.83776	5.70376
	2.98651	7.77642	5.75441	5.73609
	2.94727	7.85139	5.72182	5.81615
	2.91144	7.90897	5.71586	5.80526
	2.88749	7.88753	5.7018	5.65039
	2.87963	7.83392	5.66132	5.55861
	2.87029	7.80724	5.59684	5.60731
	2.86074	7.82174	5.53432	5.69466
	2.87434	7.87038	5.49155	5.78924
	2.91169	7.9233	5.46422	5.89693
	2.93308	7.91191	5.44626	5.93458
	2.92972	7.82844	5.45539	5.89269
	2.91219	7.75493	5.47951	5.85912
	2.88451	7.7392	5.47305	5.76529
	2.8674	7.75182	5.4269	5.52438
	2.87562	7.75594	5.3757	5.28146
	2.87864	7.76686	5.35399	5.19127
	2.83769	7.79585	5.37496	5.19586
	2.76517	7.84541	5.42861	5.22195
	2.69392	7.91191	5.46088	5.29867
	2.64787	7.95439	5.44943	5.38494
	2.64117	7.91243	5.44284	5.42533
	2.66477	7.80649	5.49891	5.50417
	2.68956	7.7241	5.59621	5.63603
	2.69754	7.67937	5.6693	5.66553
	2.70906	7.652	5.6723	5.58093
	2.74617	7.65369	5.59976	5.53563
	2.78482	7.68699	5.49487	5.52464
	2.80109	7.70878	5.42207	5.46213
	2.78343	7.71642	5.40247	5.41065
	2.73915	7.73293	5.39479	5.42363
	2.69148	7.73736	5.37167	5.46213
	2.67339	7.72264	5.35535	5.56698
	2.67684	7.7376	5.35627	5.78281
	2.68012	7.7971	5.3764	5.95548
	2.68909	7.85056	5.4129	5.95814
	2.72321	7.87587	5.44952	5.88117
	2.7726	7.88418	5.46417	5.81545
	2.80813	7.85699	5.4764	5.73545
	2.81097	7.80455	5.51931	5.69108
	2.78457	7.78776	5.58212	5.75556
	2.75365	7.80479	5.63761	5.85707
[truncated: 5,501 more rows]

## Sheet: panel_E_raclo
	0.119704	0.238249	0.34174	0.342593
	0.145681	0.203697	0.357526	0.336559
	0.159415	0.115632	0.346937	0.325118
	0.170474	0.041997	0.342276	0.328949
	0.214197	0.0122205	0.254248	0.369508
	0.228695	-0.0425618	0.149329	0.373183
	0.191752	-0.0805511	0.148605	0.303972
	0.168337	-0.016886	0.152503	0.245208
	0.158665	0.084641	0.0856392	0.222975
	0.1116	0.128494	0.0888158	0.164301
	0.0792213	0.169467	0.195682	0.0662856
	0.110034	0.248978	0.230296	-0.00727773
	0.146323	0.287044	0.18169	-0.0374646
	0.154095	0.261606	0.159905	-0.0213816
	0.175584	0.218946	0.119952	0.06274
	0.200956	0.125222	0.0285428	0.120937
	0.168905	-0.0182075	0.0064565	0.0494946
	0.114706	-0.0693193	0.0755793	-0.0842524
	0.092285	-0.00100166	0.0895125	-0.149497
	0.0524779	0.0943186	0.0718552	-0.171234
	-0.0299529	0.205435	0.102106	-0.155719
	-0.0850753	0.369685	0.109509	-0.0687689
	-0.0828593	0.490982	0.0882158	0.0580218
	-0.0909036	0.499586	0.178458	0.136018
	-0.0658452	0.464177	0.336076	0.160687
	0.0181823	0.41579	0.352805	0.152562
	0.0704356	0.308922	0.282474	0.0733114
	0.0641571	0.174561	0.265301	-0.0336721
	0.0780491	0.128738	0.260779	-0.0773814
	0.111314	0.126173	0.23738	-0.0624577
	0.109092	0.0938456	0.291921	-0.0279384
	0.111432	0.0983771	0.372773	0.0433401
	0.138597	0.152865	0.337511	0.112141
	0.120102	0.184247	0.268157	0.0541024
	0.057633	0.22896	0.247779	-0.109998
	0.0427026	0.361553	0.19054	-0.216075
	0.0585497	0.490817	0.0958042	-0.211801
	0.0499792	0.547462	0.118202	-0.165693
	0.0817906	0.598632	0.217494	-0.122942
	0.170756	0.636276	0.236606	-0.0873302
	0.210335	0.598442	0.229779	-0.0763438
	0.19536	0.544993	0.250507	-0.0374966
	0.211439	0.562779	0.215651	0.0422424
	0.223854	0.557195	0.133579	0.0775591
	0.199176	0.459942	0.112932	0.030356
	0.217833	0.36632	0.0830703	-0.00097273
	0.279847	0.300312	-0.0306202	0.0292289
	0.293772	0.220077	-0.088634	0.0254056
	0.2763	0.195834	-0.0280726	-0.0532472
	0.271418	0.264526	0.0312785	-0.140235
	0.221271	0.307028	0.0606662	-0.177372
	0.11929	0.304754	0.145997	-0.140759
	0.0583394	0.342541	0.190967	-0.00220017
	0.0465487	0.412915	0.095734	0.161346
	0.0108885	0.426308	-0.0256632	0.188587
	-0.0171386	0.430682	-0.0925781	0.086071
	0.0142922	0.489842	-0.165865	0.0126214
	0.0357279	0.523764	-0.175273	0.0361812
	0.0120505	0.517853	-0.0116142	0.114319
	0.00550745	0.5268	0.165281	0.191045
	0.0173154	0.471021	0.19273	0.182536
	-0.010696	0.301648	0.158115	-0.00256823
	-0.0237636	0.166825	0.121843	-0.151437
	0.0273526	0.1418	0.0152912	-0.205522
	0.0577503	0.128856	-0.0895951	-0.221519
	0.0397433	0.0957922	-0.0986115	-0.268594
	0.0480051	0.0821704	-0.130116	-0.278185
	0.0833608	0.0830383	-0.217561	-0.223163
	0.0941379	0.0760227	-0.211812	-0.158665
	0.115319	0.119884	-0.0982886	-0.0890856
	0.150767	0.20903	-0.0305973	0.0149972
	0.123756	0.239713	0.019963	0.104866
	0.0457694	0.211979	0.119098	0.157375
	0.0091514	0.17699	0.13905	0.232184
	0.00799894	0.0954122	0.0461219	0.310222
	-0.0185685	-0.0521855	0.0066744	0.329713
	-0.0287385	-0.141895	0.06929	0.329412
	0.00616011	-0.153869	0.110274	0.359556
	0.0118012	-0.166167	0.151867	0.35914
	-0.0303792	-0.177582	0.215782	0.297366
	-0.0578353	-0.145976	0.180721	0.216582
	-0.0816506	-0.138336	0.0552547	0.0865703
	-0.140374	-0.198046	-0.0232705	-0.113454
	-0.15195	-0.194322	-0.103928	-0.264941
	-0.097627	-0.151902	-0.294181	-0.28009
	-0.0667863	-0.150445	-0.439112	-0.244923
	-0.0718211	-0.184324	-0.412556	-0.237415
	-0.0597938	-0.202814	-0.33648	-0.234814
	-0.0709415	-0.238268	-0.314205	-0.242763
	-0.138984	-0.30349	-0.277086	-0.2589
	-0.182761	-0.301352	-0.22062	-0.226239
	-0.177263	-0.259146	-0.207949	-0.144119
	-0.183837	-0.287638	-0.169196	-0.108728
	-0.182905	-0.343865	-0.116242	-0.0889117
	-0.129728	-0.326764	-0.151358	-0.0171982
	-0.0986468	-0.262427	-0.192584	0.116847
	-0.137649	-0.161379	-0.0740852	0.182325
	-0.159049	-0.0147644	0.090101	0.186973
	-0.136437	0.0390378	0.0871131	0.172234
	-0.135723	-0.105517	-0.0183086	0.138343
	-0.133038	-0.323695	-0.131361	0.146802
	-0.0819467	-0.459413	-0.263919	0.203645
	-0.0556086	-0.530292	-0.337444	0.182353
	-0.0795389	-0.530819	-0.246914	0.0330166
	-0.0709301	-0.454225	-0.126571	-0.116507
	-0.0435337	-0.390329	-0.109035	-0.16291
	-0.0694232	-0.419378	-0.0885005	-0.133279
	-0.10388	-0.441038	-0.00568136	-0.0494866
	-0.0942399	-0.392347	0.0460062	0.0511741
	-0.100426	-0.363598	0.0614302	0.0825986
	-0.129943	-0.353502	0.0978666	0.0330728
	-0.123079	-0.308222	0.0464982	-0.0118334
	-0.102032	-0.270824	-0.11026	-0.0234862
	-0.137181	-0.287921	-0.196315	-0.0600867
	-0.183986	-0.298538	-0.19584	-0.095971
	-0.182082	-0.272205	-0.254145	-0.0963413
	-0.185149	-0.29201	-0.343834	-0.0995548
	-0.205367	-0.300997	-0.331949	-0.118845
	-0.177334	-0.216578	-0.286359	-0.0923984
	-0.128307	-0.150348	-0.257149	-0.0491275
	-0.134887	-0.196983	-0.17951	-0.0617476
	-0.141509	-0.260628	-0.116795	-0.0940259
	-0.0983101	-0.275693	-0.192288	-0.0904184
	-0.0822388	-0.278792	-0.295905	-0.0948141
	-0.0986147	-0.261501	-0.281888	-0.138212
	-0.0766926	-0.211645	-0.226625	-0.186552
	-0.0538626	-0.217904	-0.146769	-0.234112
	-0.0884529	-0.299864	0.0501424	-0.265296
	-0.10729	-0.338322	0.288142	-0.203335
	-0.0674766	-0.33085	0.364347	-0.0475442
	-0.0443726	-0.348853	0.303474	0.0845534
	-0.0469459	-0.353872	0.205444	0.14072
	-0.0214465	-0.300442	0.0192836	0.166196
	-0.00428232	-0.254747	-0.18537	0.150089
	-0.04645	-0.255174	-0.228918	0.0695971
	-0.0747515	-0.230161	-0.142948	-0.0114452
	-0.0582509	-0.186982	-0.0954974	-0.0625551
	-0.0639806	-0.205564	-0.0686522	-0.138844
	-0.0704925	-0.255016	-0.0350108	-0.238096
	-0.016106	-0.296054	-0.106174	-0.280215
	0.01982	-0.384495	-0.221432	-0.277085
	-0.0370123	-0.49649	-0.225542	-0.269783
	-0.102424	-0.496726	-0.192229	-0.241507
	-0.137414	-0.400299	-0.274413	-0.17737
	-0.193602	-0.285407	-0.360069	-0.117519
	-0.232914	-0.144173	-0.351536	-0.0306079
	-0.200871	0.00292575	-0.321168	0.119141
	-0.159676	0.02485	-0.279866	0.234697
	-0.140095	-0.102907	-0.189755	0.21093
	-0.0742091	-0.210674	-0.144644	0.0888603
	0.0116587	-0.260186	-0.199097	-0.0474938
	0.0243175	-0.306812	-0.172324	-0.17583
	-4.50195e-05	-0.311551	-0.0301776	-0.248407
	0.0175618	-0.254644	0.0352763	-0.241825
	0.0354016	-0.230312	-0.0246526	-0.235914
	0.0241569	-0.225114	-0.0851497	-0.257615
	0.0264105	-0.152571	-0.145865	-0.233398
	0.00709712	-0.102078	-0.215828	-0.158767
	-0.0734366	-0.181385	-0.178808	-0.134242
	-0.117079	-0.294103	-0.0928771	-0.162394
	-0.060886	-0.344659	-0.12012	-0.169035
	-0.00484761	-0.380943	-0.189829	-0.15996
	0.00905189	-0.362132	-0.151508	-0.162461
	0.0289513	-0.284377	-0.0968032	-0.164969
	0.0257094	-0.258088	-0.123783	-0.195995
	-0.0257633	-0.325612	-0.140047	-0.309797
	-0.0391987	-0.35841	-0.157813	-0.40732
	0.0121025	-0.292686	-0.242801	-0.38958
	0.0322143	-0.227044	-0.301139	-0.3117
	0.00183489	-0.182652	-0.237607	-0.254951
	-0.0106626	-0.107865	-0.185744	-0.203214
	-0.00599463	-0.0550796	-0.236512	-0.166586
	-0.0248699	-0.0998755	-0.295909	-0.19085
	-0.046478	-0.157082	-0.351095	-0.221187
	-0.0684559	-0.160837	-0.4525	-0.1974
	-0.135999	-0.179572	-0.500771	-0.147886
	-0.189958	-0.150995	-0.421245	-0.0604952
	-0.139021	-0.024499	-0.356119	0.110436
	-0.0426031	0.0506683	-0.332906	0.276553
	-0.0141024	-0.0279742	-0.226216	0.323222
	-0.0306401	-0.139308	-0.10773	0.321845
	-0.0410189	-0.213882	-0.145313	0.363419
	-0.077247	-0.277886	-0.270967	0.418181
	-0.114248	-0.294395	-0.356786	0.458904
	-0.101313	-0.271566	-0.425898	0.483032
	-0.09223	-0.322632	-0.429697	0.413262
	-0.137961	-0.441618	-0.299702	0.223745
	-0.167375	-0.495604	-0.177615	0.0420471
	-0.149661	-0.480497	-0.2258	-0.0402018
	-0.147355	-0.500789	-0.32515	-0.0483638
	-0.148706	-0.528389	-0.331679	0.00807992
	-0.110086	-0.500758	-0.326548	0.141757
	-0.0835044	-0.482855	-0.323135	0.250532
	-0.104737	-0.495296	-0.255713	0.272446
	-0.0883205	-0.456667	-0.198084	0.27695
	-0.0197603	-0.411184	-0.236225	0.304928
	0.00382461	-0.43525	-0.237669	0.290872
	-0.0055703	-0.465291	-0.146477	0.239076
	0.0182866	-0.461436	-0.0970816	0.187689
	0.0307229	-0.487257	-0.0974683	0.0963872
	-0.0098973	-0.529182	-0.0795996	-0.0278546
	-0.0371458	-0.499498	-0.124901	-0.103911
	-0.051625	-0.45857	-0.283072	-0.120115
	-0.117288	-0.492663	-0.389026	-0.141863
	-0.174146	-0.505791	-0.39534	-0.159409
	-0.161238	-0.441246	-0.433269	-0.145205
	-0.161223	-0.386393	-0.492877	-0.138023
	-0.212747	-0.381186	-0.478553	-0.118263
	-0.228484	-0.368198	-0.447952	-0.0103749
	-0.207841	-0.407942	-0.456384	0.163874
	-0.208506	-0.538048	-0.386179	0.272846
	-0.186061	-0.624198	-0.257087	0.280979
	-0.121839	-0.604479	-0.228857	0.235946
	-0.114993	-0.560947	-0.261807	0.132532
	-0.173526	-0.510991	-0.235285	0.0132329
	-0.187077	-0.40079	-0.204178	-0.0360172
	-0.159155	-0.334539	-0.213377	-0.00524107
	-0.161697	-0.394164	-0.143407	0.0139236
	-0.168371	-0.491578	-0.0445603	0.000729768
	-0.173108	-0.559854	-0.0624233	-0.0447825
	-0.235608	-0.63234	-0.12574	-0.14921
	-0.293449	-0.655042	-0.119648	-0.253085
	-0.245801	-0.56976	-0.147399	-0.242123
	-0.165271	-0.469032	-0.249409	-0.151908
	-0.144153	-0.412738	-0.299216	-0.113812
	-0.137085	-0.34663	-0.337495	-0.111704
	-0.117165	-0.262414	-0.455862	-0.0917275
	-0.146065	-0.239732	-0.543121	-0.0910228
	-0.204279	-0.253479	-0.515936	-0.119827
	-0.235067	-0.259538	-0.516285	-0.143385
	-0.273382	-0.327352	-0.570744	-0.177991
	-0.335735	-0.453516	-0.528286	-0.241245
	-0.340057	-0.491099	-0.420272	-0.24716
	-0.276581	-0.416395	-0.382149	-0.184655
	-0.246588	-0.343368	-0.368337	-0.18225
	-0.254332	-0.287506	-0.334312	-0.290699
	-0.243272	-0.235691	-0.396005	-0.441274
	-0.237194	-0.265579	-0.513636	-0.592969
	-0.253581	-0.350791	-0.539386	-0.716432
	-0.238297	-0.38745	-0.534631	-0.719403
	-0.213887	-0.406727	-0.604772	-0.613818
	-0.255151	-0.504954	-0.6614	-0.532291
	-0.299897	-0.596298	-0.642305	-0.53151
	-0.271805	-0.596818	-0.656689	-0.553571
	-0.235005	-0.560654	-0.675681	-0.59979
	-0.247478	-0.546179	-0.624509	-0.646523
	-0.254208	-0.487103	-0.611104	-0.600543
	-0.236672	-0.434349	-0.721299	-0.483232
	-0.245829	-0.421093	-0.803283	-0.412086
	-0.253226	-0.377452	-0.783239	-0.399264
	-0.224169	-0.299816	-0.805099	-0.402956
	-0.212342	-0.297619	-0.878758	-0.47169
	-0.242857	-0.376847	-0.936355	-0.598656
	-0.249692	-0.398851	-1.0348	-0.678003
	-0.228759	-0.380128	-1.174	-0.688212
	-0.238306	-0.41685	-1.17074	-0.689012
	-0.236291	-0.4786	-1.00038	-0.672324
	-0.185156	-0.551271	-0.859356	-0.634092
	-0.15041	-0.678216	-0.793217	-0.68794
	-0.161752	-0.781	-0.748572	-0.854164
	-0.135962	-0.739775	-0.780135	-0.998277
	-0.103205	-0.62873	-0.887553	-1.03573
	-0.144718	-0.560815	-0.919061	-0.975992
	-0.201289	-0.497229	-0.875266	-0.822346
	-0.202313	-0.41539	-0.909627	-0.624436
	-0.196267	-0.373965	-0.975382	-0.525754
	-0.20202	-0.357525	-0.96193	-0.542395
	-0.181483	-0.295836	-0.928635	-0.582263
	-0.178011	-0.276956	-0.937335	-0.625219
	-0.228221	-0.367792	-0.903219	-0.656643
	-0.249965	-0.44632	-0.882147	-0.642891
	-0.215139	-0.440246	-0.972177	-0.562096
	-0.215714	-0.425208	-1.04743	-0.514
	-0.254057	-0.406173	-1.00688	-0.53886
	-0.25068	-0.349999	-0.959607	-0.583195
	-0.243563	-0.348628	-0.948622	-0.636727
	-0.283338	-0.414244	-0.86553	-0.697089
	-0.301986	-0.433649	-0.791478	-0.683143
	-0.275793	-0.429794	-0.866215	-0.581337
	-0.278898	-0.49869	-0.994069	-0.510432
	-0.295034	-0.569598	-1.07872	-0.506701
	-0.266467	-0.557272	-1.20319	-0.516048
	-0.241994	-0.540607	-1.35501	-0.540757
	-0.245661	-0.571037	-1.39373	-0.592367
	-0.206797	-0.593133	-1.36103	-0.58778
	-0.131943	-0.613644	-1.34816	-0.514323
	-0.122643	-0.67165	-1.28561	-0.474635
	-0.162183	-0.696804	-1.14404	-0.479683
	-0.180375	-0.62993	-1.07053	-0.475005
	-0.213858	-0.557919	-1.07383	-0.466136
	-0.277459	-0.527233	-1.01166	-0.474769
	-0.29151	-0.468535	-0.939786	-0.452467
	-0.251977	-0.407365	-0.960764	-0.427375
	-0.246126	-0.428068	-0.999924	-0.474785
	-0.256091	-0.459991	-1.02558	-0.557304
	-0.226053	-0.452907	-1.13892	-0.594544
	-0.19969	-0.470437	-1.26984	-0.605257
	-0.192359	-0.480253	-1.3006	-0.601828
	-0.147517	-0.394003	-1.32361	-0.535326
	-0.099411	-0.299291	-1.418	-0.447434
	-0.138769	-0.306539	-1.46357	-0.441202
	-0.208846	-0.353016	-1.42436	-0.498912
	-0.248661	-0.393145	-1.42819	-0.540366
	-0.310246	-0.452542	-1.429	-0.581437
	-0.385499	-0.502074	-1.30972	-0.642419
	-0.380743	-0.478398	-1.16464	-0.66901
	-0.31338	-0.441196	-1.11094	-0.659043
	-0.282803	-0.46578	-1.08996	-0.66193
	-0.281155	-0.477253	-1.08583	-0.648396
	-0.286761	-0.435412	-1.17187	-0.570119
	-0.342496	-0.431884	-1.22392	-0.493409
	-0.416133	-0.483641	-1.12514	-0.452003
	-0.418898	-0.495061	-1.00241	-0.38221
	-0.388181	-0.464762	-0.952846	-0.304216
	-0.404005	-0.439139	-0.882415	-0.288048
	-0.411693	-0.361161	-0.79979	-0.287529
	-0.380781	-0.282576	-0.839134	-0.234296
	-0.391905	-0.311582	-0.929852	-0.183529
	-0.446172	-0.380154	-0.972836	-0.149904
	-0.46176	-0.352364	-1.01158	-0.102711
	-0.457316	-0.282195	-1.03897	-0.0893559
	-0.472654	-0.24669	-0.936033	-0.14213
	-0.450688	-0.196293	-0.781747	-0.15882
	-0.400106	-0.13935	-0.750145	-0.0887058
	-0.404059	-0.159484	-0.763598	-0.0364687
	-0.441876	-0.198493	-0.741219	-0.0443443
	-0.444583	-0.161929	-0.785722	-0.070201
	-0.457208	-0.138442	-0.911419	-0.120309
	-0.511072	-0.18664	-0.969962	-0.209362
	-0.538872	-0.219295	-0.979689	-0.266692
	-0.532622	-0.22805	-1.03172	-0.263943
	-0.55933	-0.274315	-1.03595	-0.282673
	-0.587009	-0.29331	-0.97488	-0.301114
	-0.559412	-0.219403	-0.992375	-0.223203
	-0.539717	-0.169738	-1.07562	-0.0605595
	-0.562638	-0.218799	-1.0579	0.107184
	-0.559328	-0.287691	-0.995149	0.265047
	-0.515717	-0.352462	-1.01444	0.363373
	-0.492232	-0.446422	-1.04801	0.313232
	-0.461973	-0.499276	-1.04335	0.195853
	-0.386375	-0.462181	-1.05493	0.117732
	-0.329889	-0.425199	-1.06144	0.0514207
	-0.313976	-0.392223	-0.973509	-0.0339706
	-0.285511	-0.300755	-0.907313	-0.0601818
	-0.264527	-0.215095	-0.938963	-0.0291514
	-0.318734	-0.240248	-0.94468	-0.0274733
	-0.393979	-0.29926	-0.884771	-0.03757
	-0.408267	-0.297635	-0.891279	-0.0086858
	-0.407039	-0.299334	-0.935102	0.0251237
	-0.431855	-0.311195	-0.910682	0.0509174
	-0.444046	-0.263529	-0.938232	0.115402
	-0.448266	-0.191872	-1.09015	0.15934
	-0.488218	-0.158524	-1.20478	0.0810674
	-0.499322	-0.10984	-1.20454	-0.0530362
	-0.436017	-0.0650816	-1.18899	-0.126724
	-0.38733	-0.140025	-1.13809	-0.135171
	-0.393879	-0.274027	-1.01082	-0.107558
	-0.388441	-0.323571	-0.939832	-0.0407184
	-0.37004	-0.317469	-0.950332	-0.0242728
	-0.395308	-0.32935	-0.903775	-0.136145
	-0.415643	-0.303083	-0.813718	-0.286603
	-0.39855	-0.228653	-0.839333	-0.362358
	-0.413424	-0.178875	-0.903181	-0.379747
	-0.453958	-0.141804	-0.867149	-0.360105
	-0.441832	-0.0885472	-0.81127	-0.272442
	-0.411877	-0.0867333	-0.801628	-0.18079
	-0.443804	-0.178422	-0.780516	-0.16016
	-0.480941	-0.227011	-0.781764	-0.165088
	-0.475098	-0.184458	-0.899304	-0.139975
	-0.49452	-0.150343	-1.00472	-0.137917
	-0.543039	-0.15581	-0.998541	-0.158577
	-0.547964	-0.167016	-0.971729	-0.145798
	-0.533856	-0.253644	-0.943391	-0.136834
	-0.537518	-0.422267	-0.823218	-0.174697
	-0.483334	-0.506261	-0.711748	-0.196652
	-0.375292	-0.477046	-0.77754	-0.167311
	-0.328481	-0.43821	-0.914146	-0.159751
	-0.352874	-0.387454	-1.01479	-0.167161
	-0.382346	-0.29761	-1.13767	-0.145477
	-0.441875	-0.264725	-1.24727	-0.16688
	-0.521478	-0.310128	-1.19748	-0.294262
	-0.509811	-0.322206	-1.01396	-0.446056
	-0.417127	-0.299894	-0.819355	-0.5172
	-0.354235	-0.294151	-0.583431	-0.503676
	-0.307943	-0.245732	-0.358809	-0.392924
	-0.221661	-0.10791	-0.34316	-0.216024
	-0.164415	0.00413263	-0.524965	-0.103093
	-0.176698	0.00323588	-0.677842	-0.11533
	-0.188042	-0.0407371	-0.775741	-0.165774
	-0.202621	-0.0989495	-0.884542	-0.203659
	-0.27502	-0.189497	-0.933439	-0.284381
	-0.348861	-0.223401	-0.949385	-0.364648
	-0.374358	-0.14957	-1.04952	-0.367412
	-0.412668	-0.130785	-1.16051	-0.324542
	-0.45961	-0.226705	-1.12572	-0.303116
	-0.438534	-0.323636	-1.05304	-0.298472
	-0.385615	-0.383066	-1.0707	-0.283428
	-0.385467	-0.42807	-1.09518	-0.325929
	-0.395851	-0.411238	-1.09331	-0.362958
	-0.367447	-0.349759	-1.1454	-0.337184
	-0.355999	-0.364102	-1.18876	-0.278718
	-0.368353	-0.419755	-1.11322	-0.27346
	-0.354612	-0.382653	-1.02968	-0.224406
	-0.33872	-0.27833	-1.03255	-0.1377
	-0.357664	-0.209247	-1.03658	-0.0970023
	-0.347739	-0.16982	-1.05646	-0.0796615
	-0.286526	-0.144727	-1.18771	-0.0567237
	-0.262571	-0.188563	-1.30407	-0.0911527
	-0.284888	-0.240553	-1.26932	-0.172832
	-0.276357	-0.215277	-1.2233	-0.177233
	-0.251179	-0.193509	-1.26768	-0.0772195
	-0.276985	-0.255891	-1.29965	0.109423
	-0.316016	-0.30736	-1.29943	0.2841
	-0.332264	-0.277945	-1.33159	0.422863
	-0.365411	-0.241148	-1.2992	0.418
	-0.385785	-0.198682	-1.14686	0.299156
	-0.34523	-0.128601	-1.05597	0.222075
	-0.306146	-0.118746	-1.08757	0.187787
	-0.33377	-0.200684	-1.11787	0.127232
	-0.359094	-0.227867	-1.12246	0.0810302
	-0.334313	-0.193675	-1.16634	0.0779229
	-0.320347	-0.22135	-1.14804	0.0465253
	-0.330114	-0.294779	-1.03321	-0.0336679
	-0.32531	-0.313023	-0.992676	-0.11554
	-0.335017	-0.288668	-1.04907	-0.213782
	-0.385842	-0.262334	-1.03924	-0.312226
	-0.401471	-0.199284	-0.987926	-0.320381
	-0.36138	-0.144312	-1.01752	-0.247658
	-0.342271	-0.197879	-1.11346	-0.214963
	-0.343556	-0.294362	-1.08995	-0.220846
	-0.310596	-0.322395	-1.09865	-0.17917
	-0.297722	-0.339355	-1.10623	-0.124744
	-0.345878	-0.361941	-1.00075	-0.107262
	-0.369979	-0.296426	-0.854564	-0.080072
	-0.361272	-0.20743	-0.810644	-0.0246715
	-0.406972	-0.215652	-0.808011	-0.0125611
	-0.479204	-0.255217	-0.839838	-0.038382
	-0.500644	-0.242888	-0.998883	-0.0485108
	-0.500359	-0.243991	-1.18556	-0.0408923
	-0.487341	-0.275367	-1.22377	-0.0299383
	-0.40083	-0.268115	-1.16598	0.0432203
	-0.298183	-0.270164	-1.13589	0.171908
	-0.295094	-0.321692	-1.0682	0.275321
	-0.356974	-0.329428	-0.971362	0.372984
	-0.398724	-0.248033	-0.96371	0.466956
	-0.444856	-0.186479	-1.00147	0.450147
	-0.486135	-0.146834	-0.952855	0.311167
	-0.445371	-0.0332478	-0.905206	0.197921
	-0.368435	0.0877152	-0.937651	0.189991
	-0.351538	0.0982794	-0.93594	0.231609
	-0.355976	0.0148722	-0.913134	0.281403
	-0.34062	-0.101802	-0.980075	0.327404
	-0.369657	-0.26559	-1.05811	0.274782
	-0.42848	-0.406743	-1.03443	0.173964
	-0.436608	-0.440127	-1.01789	0.162985
	-0.42863	-0.454871	-1.06421	0.261231
	-0.468095	-0.525346	-1.03777	0.341752
	-0.49546	-0.5598	-0.948364	0.355149
	-0.477718	-0.540753	-0.923064	0.332352
	-0.48805	-0.588323	-0.927146	0.294368
	-0.515249	-0.670023	-0.879648	0.281854
	-0.490438	-0.687304	-0.881279	0.340513
	-0.452455	-0.662211	-0.930323	0.40857
	-0.449751	-0.622602	-0.900193	0.393512
	-0.412532	-0.536396	-0.763807	0.362732
	-0.328284	-0.443215	-0.710912	0.39968
	-0.300583	-0.440717	-0.689915	0.467208
	-0.330477	-0.478773	-0.597489	0.513211
	-0.341807	-0.47149	-0.588174	0.530452
	-0.347013	-0.456882	-0.641151	0.464095
	-0.375752	-0.464316	-0.609891	0.291339
	-0.374945	-0.418084	-0.549529	0.137155
	-0.359125	-0.364072	-0.613062	0.112234
	-0.411628	-0.425124	-0.731651	0.151683
	-0.485291	-0.539787	-0.82068	0.165105
	-0.490355	-0.589283	-0.936199	0.147135
	-0.460254	-0.598562	-1.00857	0.0781388
	-0.44908	-0.587218	-0.924442	-0.0140237
	-0.420372	-0.488434	-0.800484	-0.00443014
	-0.379264	-0.36379	-0.805938	0.139232
	-0.377051	-0.332472	-0.834331	0.281945
	-0.361596	-0.359052	-0.789361	0.348915
	-0.279686	-0.377152	-0.784298	0.390307
	-0.219999	-0.412783	-0.815812	0.395425
	-0.255366	-0.460368	-0.790787	0.346617
	-0.31868	-0.426017	-0.769369	0.299649
	-0.372863	-0.369319	-0.815125	0.254724
	-0.449316	-0.401233	-0.762501	0.143572
	-0.499887	-0.446213	-0.586269	0.0156481
	-0.487318	-0.410388	-0.489082	-0.0305807
	-0.485387	-0.36083	-0.487029	-0.0464721
	-0.517996	-0.353343	-0.471193	-0.0773456
	-0.510661	-0.329031	-0.496011	-0.0698776
	-0.482795	-0.343367	-0.636927	-0.016502
	-0.500835	-0.439368	-0.755664	0.0111424
	-0.51298	-0.490625	-0.796489	0.028303
	-0.470746	-0.437541	-0.805377	0.0577117
	-0.438225	-0.416862	-0.701631	0.0323083
	-0.43982	-0.45076	-0.444719	-0.0301686
	-0.42756	-0.456014	-0.254123	-0.0106344
	-0.435129	-0.489709	-0.272983	0.10031
	-0.498552	-0.575835	-0.325451	0.179409
	-0.538718	-0.602063	-0.322185	0.213231
	-0.515198	-0.556065	-0.330725	0.255917
	-0.519924	-0.56393	-0.319025	0.276115
	-0.582057	-0.61918	-0.282786	0.280801
	-0.626206	-0.613705	-0.328538	0.331025
	-0.644256	-0.579425	-0.48272	0.379671
	-0.656004	-0.560545	-0.506645	0.324178
	-0.608787	-0.499115	-0.390559	0.241431
	-0.517039	-0.403456	-0.294485	0.244008
	-0.492227	-0.390041	-0.211631	0.317764
	-0.528116	-0.424943	-0.0799454	0.421292
	-0.530225	-0.432347	-0.0568026	0.518875
	-0.512546	-0.507085	-0.0265095	0.543476
	-0.526208	-0.660537	0.0346743	0.492674
	-0.539785	-0.743919	0.0190625	0.507823
	-0.543147	-0.714091	-0.201661	0.635815
	-0.593522	-0.673103	-0.481749	0.757708
	-0.646688	-0.619803	-0.65324	0.807948
	-0.621282	-0.547927	-0.771135	0.827805
	-0.562727	-0.552819	-0.822326	0.795485
	-0.541697	-0.6337	-0.716334	0.692392
	-0.524252	-0.669868	-0.56358	0.61806
	-0.492394	-0.654297	-0.511996	0.621733
	-0.495218	-0.658522	-0.479579	0.625036
	-0.485059	-0.631257	-0.41597	0.605387
	-0.404052	-0.553888	-0.4424	0.597942
	-0.340814	-0.527593	-0.499622	0.560822
	-0.366334	-0.556613	-0.427475	0.468896
	-0.402687	-0.543637	-0.312862	0.40169
	-0.416383	-0.504637	-0.336506	0.39368
	-0.460956	-0.509485	-0.447319	0.397526
	-0.493867	-0.492633	-0.550962	0.405671
	-0.463259	-0.411914	-0.677593	0.430569
	-0.429303	-0.356911	-0.731993	0.397276
	-0.421618	-0.368673	-0.630297	0.28621
	-0.379664	-0.363231	-0.510465	0.202029
	-0.327368	-0.340299	-0.500742	0.198099
	-0.343764	-0.342387	-0.475299	0.233892
	-0.371171	-0.294792	-0.378564	0.300314
	-0.33639	-0.202467	-0.353073	0.406674
	-0.29067	-0.184045	-0.390329	0.471436
	-0.279451	-0.244901	-0.409107	0.486155
	-0.263938	-0.259026	-0.458797	0.547899
	-0.261751	-0.236905	-0.540818	0.646421
	-0.320034	-0.241909	-0.486424	0.655528
	-0.371721	-0.215404	-0.331308	0.575495
	-0.375682	-0.151658	-0.288833	0.507274
	-0.41121	-0.168431	-0.355656	0.476394
	-0.469002	-0.269766	-0.399132	0.501494
	-0.460093	-0.327969	-0.447815	0.586628
	-0.428505	-0.377281	-0.529711	0.638029
	-0.44944	-0.481606	-0.546469	0.56577
	-0.466739	-0.517245	-0.5419	0.457246
	-0.448956	-0.515591	-0.651819	0.440788
	-0.452353	-0.580369	-0.687096	0.49637
	-0.45803	-0.681254	-0.604894	0.573955
	-0.415444	-0.732423	-0.520337	0.663803
	-0.376618	-0.776907	-0.499172	0.714757
	-0.374625	-0.808598	-0.41293	0.66208
	-0.342087	-0.727504	-0.298652	0.56107
	-0.275995	-0.56803	-0.280367	0.481324
	-0.260987	-0.458284	-0.288895	0.397067
	-0.289387	-0.388902	-0.263186	0.332688
	-0.296966	-0.292874	-0.310005	0.348056
	-0.309002	-0.244662	-0.42407	0.400022
	-0.343412	-0.287094	-0.448304	0.404123
	-0.392316	-0.314873	-0.428772	0.410591
	-0.317182	-0.281628	-0.471728	0.457148
	-0.300663	-0.256274	-0.51228	0.488433
	-0.308165	-0.193927	-0.514361	0.515235
	-0.277106	-0.0480239	-0.597282	0.622393
	-0.265301	0.0549508	-0.737333	0.79635
	-0.314452	0.0706782	-0.771945	0.936865
	-0.360531	0.0975696	-0.728667	1.01631
	-0.374437	0.127352	-0.703609	0.993155
	-0.400404	0.0809011	-0.635669	0.817476
	-0.4155	0.0239902	-0.502117	0.603094
	-0.390087	0.0165867	-0.440866	0.504192
	-0.383975	-0.0241832	-0.435627	0.494484
	-0.411333	-0.0926554	-0.351196	0.478488
	-0.392425	-0.0892988	-0.261384	0.482153
	-0.325437	-0.0689679	-0.260434	0.528691
	-0.302165	-0.0950942	-0.248154	0.584906
	-0.301317	-0.105342	-0.211339	0.67318
	-0.260805	-0.0626163	-0.311087	0.808588
	-0.230824	-0.0447323	-0.481748	0.880825
	-0.242959	-0.0392834	-0.574825	0.833332
	-0.243609	0.0165358	-0.651133	0.778168
	-0.239851	0.0612118	-0.74921	0.752623
	-0.284081	0.0241175	-0.742225	0.705456
	-0.313527	0.00796971	-0.608633	0.671171
	-0.285672	0.0615661	-0.503272	0.709476
	-0.273174	0.0950284	-0.420237	0.754856
	-0.298265	0.0916168	-0.299704	0.764467
	-0.290728	0.118097	-0.227111	0.783251
	-0.262258	0.116489	-0.250041	0.787362
	-0.279294	0.0358891	-0.225624	0.726054
	-0.303182	-0.00139377	-0.177879	0.655948
	-0.293022	0.0356248	-0.229405	0.625578
	-0.308857	0.0347785	-0.296082	0.578365
	-0.345222	0.000353131	-0.297012	0.519319
	-0.309133	0.0277652	-0.36514	0.516233
	-0.231191	0.0597404	-0.541708	0.545329
	-0.201828	0.0382944	-0.649772	0.538528
	-0.184404	0.060033	-0.657381	0.521528
	-0.161763	0.142073	-0.674955	0.543896
	-0.206007	0.183578	-0.636359	0.549267
	-0.277582	0.162296	-0.504098	0.570734
	-0.278759	0.132304	-0.415096	0.665906
	-0.263725	0.0378181	-0.423783	0.766346
	-0.297684	-0.080202	-0.408981	0.769118
	-0.308357	-0.0583729	-0.394596	0.70465
	-0.277319	0.065811	-0.452618	0.650454
	-0.288167	0.132368	-0.474926	0.610672
	-0.326277	0.119196	-0.399616	0.624001
	-0.321128	0.095351	-0.337368	0.708428
	-0.317465	0.0236927	-0.306244	0.763715
	-0.333721	-0.0744734	-0.20728	0.706176
	-0.290588	-0.116308	-0.154474	0.621091
	-0.201608	-0.121332	-0.257317	0.595214
	-0.166813	-0.139255	-0.36204	0.588514
	-0.169836	-0.0926996	-0.379848	0.568553
	-0.154739	0.0560989	-0.435168	0.516364
	-0.183215	0.153184	-0.543537	0.393402
	-0.274058	0.114932	-0.581833	0.255358
	-0.337186	0.0359805	-0.584203	0.259256
	-0.368084	-0.0348731	-0.580084	0.409634
	-0.426533	-0.112169	-0.470198	0.537028
	-0.459379	-0.125692	-0.301415	0.575724
	-0.420683	-0.0481819	-0.265108	0.586649
	-0.392877	0.00733307	-0.319347	0.60702
	-0.399981	0.0231462	-0.305159	0.644534
	-0.36476	0.0811163	-0.268658	0.711027
	-0.299982	0.14249	-0.282087	0.748778
	-0.286415	0.11448	-0.268148	0.704504
	-0.295737	0.0548618	-0.216327	0.662505
	-0.289019	-0.0168437	-0.235503	0.712777
	-0.32432	-0.147697	-0.273359	0.783412
	-0.39806	-0.295068	-0.234925	0.759081
	-0.422795	-0.336038	-0.24247	0.645183
	-0.401194	-0.295514	-0.345179	0.473959
	-0.407534	-0.239323	-0.393998	0.308344
	-0.414024	-0.118597	-0.340657	0.282642
	-0.401697	0.0534262	-0.31169	0.443958
	-0.439421	0.155143	-0.28757	0.634711
	-0.505207	0.167821	-0.220776	0.723793
	-0.499992	0.17484	-0.200457	0.746859
	-0.449074	0.144323	-0.207014	0.736203
	-0.436058	0.0425345	-0.0983203	0.695641
	-0.428991	-0.00417071	0.0592245	0.677416
	-0.402343	0.0336658	0.03766	0.708293
	-0.418856	0.0338205	-0.126431	0.73354
	-0.468416	-0.0215001	-0.276779	0.769076
	-0.482208	-0.0407257	-0.393622	0.869749
	-0.494476	-0.0295706	-0.427082	0.939215
	-0.563168	-0.00832943	-0.289041	0.861074
	-0.621621	0.0897537	-0.104412	0.70085
	-0.625143	0.196935	-0.0878314	0.584993
	-0.632264	0.154747	-0.132834	0.51418
	-0.643339	0.00802515	-0.0699483	0.477638
	-0.606042	-0.0940848	0.0435594	0.470899
	-0.564495	-0.188155	0.113949	0.420026
	-0.554284	-0.298706	0.143763	0.320369
	-0.489096	-0.308482	0.0632544	0.294735
	-0.367144	-0.250958	-0.11632	0.404822
	-0.314313	-0.230549	-0.163824	0.535396
	-0.346757	-0.197371	-0.0571046	0.597573
	-0.381456	-0.105901	-0.0291046	0.573722
	-0.435123	-0.0662666	-0.137334	0.451408
	-0.513165	-0.0875715	-0.193897	0.30279
	-0.543997	-0.0417452	-0.168322	0.272009
	-0.547694	0.0530012	-0.139631	0.367283
	-0.596229	0.0920879	-0.0675339	0.42749
	-0.634596	0.115348	0.0216764	0.409736
	-0.587328	0.155129	0.0115206	0.398736
	-0.526763	0.123586	-0.0513051	0.412693
	-0.525127	0.0347876	-0.0375651	0.408958
	-0.546448	-0.00229777	-0.0461971	0.381716
	-0.58133	-0.0382004	-0.166749	0.308263
	-0.650898	-0.139752	-0.254344	0.17591
	-0.675764	-0.227002	-0.259317	0.101675
	-0.602124	-0.24187	-0.300521	0.159663
	-0.547246	-0.259952	-0.385326	0.236843
	-0.575304	-0.26018	-0.448553	0.224735
	-0.618125	-0.191853	-0.574994	0.173834
	-0.665879	-0.150381	-0.732286	0.142183
	-0.761217	-0.193473	-0.714025	0.143203
	-0.834684	-0.205143	-0.515432	0.241126
	-0.834728	-0.15363	-0.365441	0.421673
	-0.84269	-0.163959	-0.353662	0.544139
	-0.871424	-0.227573	-0.392504	0.552833
	-0.849225	-0.251659	-0.47982	0.56382
	-0.798871	-0.262873	-0.544589	0.608534
	-0.792288	-0.316309	-0.448838	0.588071
	-0.788076	-0.36447	-0.270445	0.4841
	-0.759058	-0.40626	-0.216477	0.357737
	-0.776412	-0.49976	-0.239948	0.258805
	-0.831057	-0.56382	-0.199227	0.246005
	-0.845427	-0.523876	-0.161023	0.3431
	-0.857287	-0.47267	-0.165191	0.409612
	-0.925265	-0.481767	-0.126428	0.325369
	-0.963849	-0.468409	-0.0648558	0.186286
	-0.926093	-0.416594	-0.0378898	0.143158
	-0.897274	-0.395326	0.0985389	0.155937
	-0.885785	-0.372519	0.382628	0.191925
	-0.842004	-0.31305	0.53537	0.263297
	-0.811053	-0.30768	0.446443	0.315549
	-0.833431	-0.384121	0.296462	0.331992
	-0.827433	-0.420601	0.185397	0.389986
	-0.771999	-0.422303	0.0863821	0.475151
	-0.752681	-0.452447	0.0724176	0.45775
	-0.767926	-0.473854	0.111665	0.344544
	-0.759776	-0.438207	0.0307094	0.290553
	-0.753407	-0.407603	-0.115856	0.341234
	-0.761946	-0.40297	-0.128168	0.458555
	-0.727707	-0.323452	-0.0619682	0.618379
	-0.691143	-0.180427	-0.120771	0.74134
	-0.746742	-0.0744619	-0.253852	0.71727
	-0.83371	-0.00316578	-0.365016	0.606793
	-0.838245	0.055739	-0.440103	0.547619
	-0.811809	-0.00274292	-0.381736	0.516354
	-0.820678	-0.166265	-0.144831	0.454781
	-0.821059	-0.271136	0.028946	0.396761
	-0.815427	-0.306016	-0.0598428	0.364763
	-0.843664	-0.33518	-0.215843	0.332425
	-0.848996	-0.306948	-0.263871	0.364551
	-0.801733	-0.203327	-0.256482	0.485196
	-0.793615	-0.171248	-0.232324	0.5626
	-0.835256	-0.235803	-0.185768	0.525376
	-0.819498	-0.261811	-0.220887	0.472006
	-0.745226	-0.246879	-0.349395	0.471559
	-0.695745	-0.220698	-0.380767	0.466944
	-0.687682	-0.136198	-0.340993	0.44594
	-0.72268	-0.0168078	-0.437075	0.426701
	-0.832976	0.00150646	-0.640471	0.360858
	-0.948409	-0.0365776	-0.739212	0.276781
	-0.953005	0.0331874	-0.710663	0.279554
	-0.8824	0.161231	-0.616672	0.350144
	-0.840777	0.222477	-0.455929	0.360454
	-0.802435	0.235071	-0.341726	0.320002
	-0.716102	0.243247	-0.369565	0.303668
	-0.642291	0.204664	-0.386939	0.31957
	-0.600244	0.221266	-0.258912	0.397323
	-0.542739	0.387344	-0.172323	0.582255
	-0.503027	0.575952	-0.240205	0.783719
	-0.534175	0.662196	-0.334512	0.860834
	-0.564275	0.728739	-0.402955	0.849206
	-0.544367	0.835256	-0.484224	0.81814
	-0.536153	0.913837	-0.518419	0.75907
	-0.531612	0.994703	-0.491476	0.720069
	-0.467454	1.11552	-0.563857	0.797601
	-0.384152	1.15927	-0.72732	0.988148
	-0.343181	1.1262	-0.772775	1.12807
	-0.305423	1.18216	-0.684957	1.18649
	-0.260179	1.33497	-0.627228	1.1902
	-0.277812	1.43138	-0.613886	1.14786
	-0.321129	1.45627	-0.585785	1.14981
	-0.298795	1.45806	-0.594439	1.28645
	-0.241153	1.40028	-0.567156	1.43816
	-0.220616	1.35265	-0.40634	1.45406
	-0.198626	1.43735	-0.281905	1.37599
	-0.148886	1.59964	-0.387562	1.25406
	-0.116516	1.72637	-0.564737	1.09405
	-0.0610949	1.85534	-0.575262	1.00981
	0.0705049	2.01307	-0.416864	1.11641
	0.191259	2.12262	-0.175937	1.30004
	0.22788	2.16829	-0.0239928	1.45886
	0.252541	2.24712	-0.132102	1.54902
	0.287185	2.34625	-0.426896	1.58136
	0.282599	2.39411	-0.616286	1.55414
	0.290443	2.42451	-0.645063	1.53498
	0.365429	2.47583	-0.712878	1.56041
	0.431143	2.44537	-0.836765	1.52919
	0.437674	2.30595	-0.864269	1.42214
	0.460641	2.19473	-0.788747	1.36715
	0.511259	2.12836	-0.710323	1.40821
	0.524455	2.05876	-0.610929	1.44016
	0.542963	2.06122	-0.535203	1.42338
	0.613222	2.15938	-0.580639	1.38051
	0.659304	2.23802	-0.633214	1.31959
	0.65805	2.28069	-0.558506	1.31845
	0.699658	2.35405	-0.470142	1.46875
	0.764677	2.37875	-0.501882	1.70811
	0.765508	2.29518	-0.561933	1.87541
	0.734452	2.20285	-0.633322	1.93856
	0.708291	2.14341	-0.766227	1.93879
	0.6321	2.04595	-0.845068	1.86899
	0.550729	1.95026	-0.781246	1.77172
	0.569282	1.95007	-0.724238	1.71208
	0.641257	1.98497	-0.782817	1.6789
	0.668655	2.01111	-0.814697	1.61743
	0.670424	2.08401	-0.769937	1.58854
	0.674347	2.20786	-0.724524	1.63614
	0.6411	2.25615	-0.661566	1.66774
	0.618975	2.24034	-0.552943	1.65849
	0.680362	2.23576	-0.524694	1.70411
	0.746621	2.20824	-0.58312	1.81378
	0.722212	2.15279	-0.571571	1.87306
	0.664752	2.17326	-0.548323	1.86087
	0.631554	2.25192	-0.655563	1.7963
	0.589499	2.25906	-0.789561	1.69389
	0.571597	2.23629	-0.819539	1.64141
	0.624943	2.29101	-0.833183	1.71147
	0.663886	2.34895	-0.891075	1.81353
	0.637615	2.34972	-0.938832	1.83262
	0.625055	2.32329	-1.01868	1.80289
	0.651112	2.23799	-1.11665	1.77875
	0.631643	2.11903	-1.05237	1.75785
	0.582965	2.04564	-0.785905	1.72968
	0.567619	2.09525	-0.563045	1.85774
	0.563634	2.15667	-0.499336	1.98223
	0.560146	2.15464	-0.493676	2.0064
	0.604932	2.16305	-0.553509	2.03168
	0.668911	2.18272	-0.707374	2.13567
	0.659031	2.16305	-0.82753	2.24099
	0.599642	2.20392	-0.865117	2.29101
	0.562997	2.34547	-0.950953	2.33859
	0.522255	2.45559	-1.04258	2.31372
	0.454248	2.46433	-1.02442	2.22148
	0.433283	2.45213	-0.974011	2.17946
	0.482815	2.39588	-1.00427	2.20741
	0.542469	2.24735	-1.03603	2.229
	0.615166	2.11603	-1.01373	2.25523
	0.712324	2.0622	-0.995402	2.32976
	0.750468	2.02366	-0.929325	2.35579
	0.695606	2.00368	-0.78034	2.29792
	0.636897	2.07784	-0.701323	2.24313
	0.597478	2.18279	-0.776162	2.21225
	0.532396	2.20305	-0.834785	2.15661
	0.501465	2.17704	-0.795689	2.13822
	0.553652	2.16305	-0.774287	2.19898
	0.611408	2.10645	-0.757254	2.23658
	0.62572	2.02847	-0.691762	2.20391
	0.648257	2.03114	-0.666297	2.17326
	0.65191	2.06422	-0.707711	2.10415
	0.570001	2.07846	-0.650244	2.08785
	0.467324	2.16855	-0.525425	2.13252
	0.423434	2.3036	-0.527927	2.26481
	0.394352	2.30594	-0.600233	2.36238
	0.378237	2.16929	-0.615755	2.38955
	0.430239	2.07002	-0.620525	2.4263
	0.48444	2.04824	-0.656874	2.49928
	0.460718	2.093	-0.645059	2.57065
	0.429532	2.24007	-0.654319	2.6511
	0.441744	2.41473	-0.760883	2.69744
	0.432352	2.48926	-0.842252	2.59818
	0.411886	2.51517	-0.822048	2.41818
	0.448425	2.57445	-0.838308	2.33077
	0.498928	2.57624	-0.928804	2.36552
	0.511533	2.531	-0.937032	2.41516
	0.543517	2.5108	-0.861697	2.41593
	0.600058	2.50666	-0.793476	2.42373
	0.586284	2.42519	-0.667675	2.3503
	0.514179	2.32254	-0.470664	2.28234
	0.470209	2.28345	-0.371992	2.30508
	0.435422	2.22789	-0.412627	2.34557
	0.393915	2.15294	-0.460221	2.32276
	0.417553	2.16687	-0.545273	2.30561
	0.493751	2.25647	-0.717153	2.32768
	0.501667	2.32669	-0.865831	2.33942
	0.46013	2.391	-0.923756	2.37966
	0.454445	2.45608	-0.95301	2.49111
	0.445128	2.44605	-0.907003	2.58529
	0.402627	2.40026	-0.719341	2.56478
	0.395401	2.42668	-0.555885	2.49473
	0.414792	2.50148	-0.533521	2.42197
	0.389716	2.52825	-0.523112	2.39856
	0.373596	2.55313	-0.446303	2.40248
	0.418213	2.62461	-0.457587	2.45472
	0.444059	2.69078	-0.562694	2.48126
	0.410987	2.71805	-0.620675	2.41965
	0.37632	2.73881	-0.639582	2.34448
	0.343701	2.71187	-0.662948	2.30386
	0.283872	2.59378	-0.60827	2.28389
	0.264177	2.52415	-0.512079	2.32565
	0.326498	2.57031	-0.551834	2.43818
	0.383849	2.60562	-0.65799	2.46271
	0.387025	2.57697	-0.676089	2.34183
	0.394118	2.56518	-0.663637	2.19903
	0.400414	2.57844	-0.679716	2.10162
	0.349974	2.58437	-0.653693	2.03992
	0.303218	2.63398	-0.613953	2.06107
	0.311733	2.69924	-0.690011	2.17101
	0.313433	2.69872	-0.808079	2.22715
	0.299651	2.68569	-0.876539	2.14896
	0.338266	2.76351	-0.967433	2.02582
	0.383469	2.8752	-1.10276	1.93119
	0.370541	2.88023	-1.14509	1.87812
	0.359789	2.83188	-1.07799	1.89035
	0.384914	2.79253	-1.03788	1.96488
	0.382154	2.73042	-0.990328	2.00173
	0.367892	2.6757	-0.887432	1.99923
	0.413531	2.69881	-0.844131	2.04345
	0.477356	2.69576	-0.904801	2.10524
	0.492801	2.61213	-0.938724	2.10836
	0.496911	2.57387	-0.954114	2.11085
	0.498395	2.60478	-1.01235	2.17261
	0.444532	2.61524	-0.994579	2.20026
	0.385885	2.64495	-0.851729	2.16771
	0.421096	2.74381	-0.730419	2.10019
	0.500738	2.79866	-0.697606	2.07046
	0.533588	2.78603	-0.666653	2.03283
	0.536631	2.80832	-0.685125	2.06778
	0.508573	2.85714	-0.831019	2.16546
	0.406749	2.85492	-0.958547	2.20355
	0.29978	2.84548	-0.961704	2.18212
	0.277241	2.87322	-0.93739	2.18978
	0.28955	2.8387	-0.931774	2.2021
	0.312008	2.72178	-0.872978	2.16388
	0.372562	2.64433	-0.856472	2.11927
	0.426487	2.62487	-0.961073	2.09245
	0.431667	2.60116	-1.04481	2.03084
	0.423148	2.63871	-1.02995	1.9634
	0.467415	2.80034	-1.00134	1.96524
	0.508308	2.95289	-0.947794	1.94559
	0.506	3.01191	-0.784641	1.88007
	0.517382	3.01947	-0.634158	1.87915
	0.540491	2.97107	-0.590419	1.96516
	0.506525	2.86873	-0.566108	2.04559
	0.450342	2.8452	-0.545284	2.07263
	0.442187	2.903	-0.628659	2.13349
	0.437725	2.90793	-0.74794	2.12893
	0.415845	2.87059	-0.78178	2.08371
	0.434325	2.91065	-0.809955	2.12407
	0.471953	2.99945	-0.895702	2.23992
	0.466822	3.0282	-0.920766	2.30662
	0.481998	2.99091	-0.86644	2.31017
	0.559624	2.9438	-0.868308	2.30572
	0.611416	2.85688	-0.89504	2.25564
	0.611659	2.8156	-0.845596	2.17244
	0.628348	2.90173	-0.799139	2.13855
	0.660124	2.99622	-0.77887	2.11349
	0.649162	2.99972	-0.67816	2.02273
	0.62632	2.97329	-0.53467	1.95487
	0.612459	2.96058	-0.516232	1.9856
	0.557462	2.89031	-0.559909	2.04131
	0.48257	2.78242	-0.540972	2.07823
	0.476651	2.70485	-0.500886	2.12608
	0.511846	2.63599	-0.46035	2.13306
	0.513724	2.59678	-0.391843	2.09573
	0.526436	2.70212	-0.395794	2.12437
	0.561838	2.91167	-0.590854	2.27897
	0.521831	3.06721	-0.808833	2.45771
	0.414205	3.11183	-0.896196	2.5946
	0.341453	3.12542	-0.917558	2.69567
	0.305544	3.11231	-0.927915	2.70799
	0.279521	3.05547	-0.852655	2.59632
	0.312449	3.02071	-0.731713	2.44991
	0.370491	2.9959	-0.676591	2.35789
	0.35144	2.90674	-0.617814	2.29686
	0.291001	2.82345	-0.537494	2.28984
	0.278538	2.85606	-0.57249	2.35167
	0.285118	2.91329	-0.688728	2.38184
	0.268057	2.91356	-0.711179	2.31851
	0.300264	2.953	-0.675906	2.28333
	0.355042	3.03689	-0.728635	2.34979
	0.367314	3.07599	-0.830091	2.4458
	0.362983	3.09106	-0.921894	2.54751
	0.393574	3.12283	-1.00047	2.66491
	0.395956	3.08242	-0.993063	2.74398
	0.350659	2.98567	-0.83873	2.74628
	0.338284	2.96456	-0.713081	2.698
	0.351886	2.99193	-0.761916	2.61
	0.318807	2.96896	-0.829703	2.4619
	0.286781	2.90268	-0.784968	2.34729
	0.308482	2.85249	-0.699759	2.32633
	0.311202	2.78988	-0.616094	2.31434
	0.270371	2.7607	-0.497154	2.23786
	0.251072	2.86417	-0.458331	2.18547
	0.253227	3.0278	-0.532478	2.21148
	0.244435	3.08413	-0.563753	2.23495
	0.265484	3.0468	-0.54651	2.2202
	0.342292	2.98955	-0.637852	2.17605
	0.406277	2.86397	-0.790787	2.09037
	0.436061	2.72015	-0.847476	2.00018
	0.483215	2.67952	-0.845642	2.00221
	0.519561	2.68281	-0.843915	2.06723
	0.479228	2.65532	-0.783852	2.09531
	0.424041	2.70111	-0.711918	2.09923
	0.425498	2.84264	-0.718966	2.12731
	0.428339	2.95366	-0.703177	2.13821
	0.413945	3.01398	-0.556404	2.12177
	0.427737	3.03903	-0.423817	2.13781
	0.441025	3.01598	-0.396639	2.18304
	0.417049	2.90417	-0.384374	2.21559
	0.428169	2.82327	-0.373749	2.29403
	0.494386	2.83954	-0.444113	2.43793
	0.533093	2.88646	-0.501441	2.53369
	0.530522	2.94193	-0.4745	2.52489
	0.540561	3.01148	-0.488428	2.50959
	0.543265	3.00678	-0.527873	2.51932
	0.504	2.88814	-0.439347	2.53104
	0.477326	2.80347	-0.261577	2.5867
	0.486763	2.78188	-0.193201	2.66623
	0.453729	2.74717	-0.239699	2.67479
	0.353346	2.76179	-0.356701	2.65218
	0.299161	2.88315	-0.550628	2.69119
	0.273888	3.01188	-0.700071	2.72332
	0.255396	3.07048	-0.664145	2.66271
	0.310544	3.09899	-0.558454	2.55681
	0.423266	3.06388	-0.583661	2.48651
	0.463899	2.9205	-0.672719	2.44872
	0.41799	2.79101	-0.698413	2.46261
	0.378719	2.78433	-0.699671	2.52237
	0.352024	2.84599	-0.693727	2.51978
	0.331937	2.91028	-0.664307	2.40921
	0.386181	2.99055	-0.685998	2.29465
	0.479284	3.03828	-0.77859	2.23061
	0.510682	2.99239	-0.733377	2.17471
	0.506817	2.9358	-0.5084	2.16193
	0.522842	2.94294	-0.33043	2.24542
	0.503515	2.9248	-0.303026	2.33057
	0.440451	2.84889	-0.328331	2.35242
	0.426679	2.82817	-0.387916	2.35176
	0.466576	2.84507	-0.488872	2.32613
	0.47835	2.82087	-0.519177	2.21254
	0.470247	2.84458	-0.498171	2.09382
	0.46998	2.92966	-0.528442	2.06493
	0.420441	2.96168	-0.558912	2.10198
	0.337678	2.94699	-0.487303	2.15479
	0.318731	2.95907	-0.428895	2.19637
	0.335581	2.95878	-0.490548	2.15259
	0.318718	2.91634	-0.575925	1.98067
	0.330901	2.90468	-0.646337	1.82249
	0.413679	2.93794	-0.752423	1.80792
	0.464513	2.92769	-0.789425	1.88769
	0.451768	2.88038	-0.667414	1.94581
	0.434909	2.89158	-0.557599	1.95066
	0.403186	2.93518	-0.595263	1.89522
	0.336777	2.9496	-0.6677	1.81488
	0.303415	2.98687	-0.723916	1.85369
	0.328396	3.03613	-0.791139	2.05187
	0.347514	2.9677	-0.792266	2.24086
	0.36911	2.83544	-0.67893	2.3104
	0.436869	2.76468	-0.602097	2.31
	0.495746	2.72324	-0.593772	2.2677
	0.477958	2.66817	-0.537229	2.16068
	0.429566	2.70443	-0.478356	2.03744
	0.405915	2.79363	-0.540004	1.91649
	0.333199	2.85038	-0.623131	1.78643
	0.25173	2.90018	-0.581359	1.70239
	0.238901	2.96756	-0.488639	1.74359
	0.24866	2.98297	-0.395363	1.85337
	0.234091	2.9156	-0.276496	1.95279
	0.251942	2.87201	-0.22906	2.08089
	0.305607	2.88561	-0.343724	2.24304
	0.324297	2.89953	-0.45161	2.32879
	0.342655	2.92671	-0.430635	2.32705
	0.408192	2.98307	-0.382226	2.34677
	0.464384	2.97732	-0.336964	2.37553
	0.466946	2.87937	-0.240661	2.34455
	0.463413	2.81095	-0.187299	2.27509
	0.461735	2.80058	-0.249402	2.19812
	0.423148	2.80077	-0.291256	2.11346
	0.384133	2.88185	-0.269324	2.10239
	0.389716	3.04981	-0.3127	2.22473
	0.386598	3.15377	-0.397766	2.39182
	0.341504	3.13274	-0.425667	2.51606
	0.335462	3.10469	-0.457407	2.61333
	0.38449	3.08413	-0.587452	2.6676
	0.405822	3.0064	-0.685608	2.62627
	0.401611	2.93709	-0.703742	2.50554
	0.418126	2.93284	-0.762673	2.51096
	0.411064	2.93979	-0.840967	2.52535
	0.37512	2.94538	-0.826728	2.50437
	0.386148	2.99166	-0.772307	2.50002
	0.422271	3.01088	-0.759008	2.5262
	0.409306	2.95249	-0.683548	2.49772
	0.406856	2.92344	-0.562944	2.43552
	0.438128	2.99067	-0.537336	2.39539
	0.434593	3.02406	-0.602779	2.3351
	0.390882	2.97616	-0.691937	2.26386
	0.385373	2.92724	-0.851068	2.25137
	0.399766	2.84275	-1.04305	2.2828
	0.376589	2.73414	-1.09354	2.28172
	0.358061	2.75944	-1.01391	2.28697
	0.38951	2.905	-0.967805	2.30518
	0.411276	2.99774	-0.938685	2.28418
	0.397373	3.01592	-0.836343	2.20146
	0.401021	3.04051	-0.739258	2.20051
	0.399644	3.04765	-0.730586	2.3131
	0.36137	3.02937	-0.730967	2.44981
	0.361226	3.03749	-0.743413	2.56802
	0.415213	3.05209	-0.794294	2.62244
	0.418347	3.0215	-0.772211	2.55592
	0.377844	3.03642	-0.63273	2.4403
	0.390718	3.1775	-0.573155	2.37941
	0.442751	3.329	-0.658342	2.32651
	0.479305	3.37218	-0.735052	2.24521
	0.521254	3.34297	-0.790885	2.22188
	0.55636	3.27181	-0.887554	2.30687
	0.52172	3.14192	-0.949985	2.45784
	0.46135	3.06345	-0.915493	2.63203
	0.460743	3.08804	-0.89274	2.79732
	0.478769	3.11149	-0.887746	2.83506
	0.462385	3.09192	-0.808018	2.6859
	0.467208	3.10204	-0.714371	2.48645
	0.515775	3.13725	-0.717007	2.34213
	0.521727	3.161	-0.733869	2.22642
	0.487604	3.22962	-0.698855	2.14177
	0.470679	3.35893	-0.705742	2.13514
	0.439365	3.40412	-0.724246	2.17016
	0.395741	3.32225	-0.640584	2.19398
	0.435542	3.205	-0.538891	2.31048
	0.539511	3.11563	-0.540634	2.45088
	0.59555	3.05188	-0.577757	2.52828
	0.616384	3.06321	-0.586599	2.57122
	0.64993	3.15359	-0.650029	2.63754
	0.649931	3.22949	-0.710093	2.6596
	0.608301	3.26176	-0.678766	2.60569
	0.602808	3.33226	-0.633486	2.5652
	0.629644	3.42693	-0.638369	2.54833
	0.61945	3.47657	-0.572891	2.51126
	0.599939	3.53952	-0.414533	2.49149
	0.615448	3.64097	-0.308825	2.54688
	0.610109	3.67117	-0.242759	2.60608
	0.572285	3.59993	-0.13583	2.62699
	0.585878	3.52745	-0.063124	2.6453
	0.638552	3.43675	-0.092135	2.66192
	0.652648	3.31233	-0.0986403	2.64305
	0.667695	3.26668	-0.0781437	2.63597
	0.700848	3.33162	-0.148365	2.67395
	0.665577	3.41148	-0.25512	2.67539
	0.577583	3.49262	-0.315395	2.62265
	0.549464	3.62212	-0.431939	2.60148
	0.566426	3.73762	-0.632854	2.64577
	0.583993	3.75805	-0.7562	2.69238
	0.637923	3.75707	-0.770401	2.74101
	0.699894	3.76275	-0.761601	2.78856
	0.695045	3.70779	-0.679893	2.75342
	0.640747	3.65802	-0.510858	2.64168
	0.628699	3.72164	-0.418314	2.5763
	0.643087	3.78152	-0.474116	2.57312
	0.642226	3.75928	-0.522089	2.60251
	0.667611	3.75253	-0.535412	2.69915
	0.71633	3.78868	-0.561995	2.85057
	0.704151	3.78808	-0.524674	2.92146
	0.64958	3.77022	-0.374427	2.89755
	0.632617	3.76768	-0.24245	2.86889
	0.622898	3.71362	-0.187266	2.84814
	0.593841	3.65468	-0.117403	2.77425
	0.610192	3.73916	-0.0946614	2.6914
	0.676726	3.93706	-0.182095	2.62789
	0.706881	4.08041	-0.235582	2.55134
	0.709918	4.15395	-0.16213	2.50922
	0.734036	4.21599	-0.100097	2.58332
	0.725409	4.2182	-0.0919954	2.7213
	0.681251	4.16493	-0.0457628	2.82164
	0.691662	4.16893	-0.0143316	2.90834
	0.764482	4.20134	-0.0522492	2.98337
	0.813354	4.15853	-0.0385224	2.96874
	0.834324	4.10786	0.0474975	2.88568
	0.862274	4.10844	0.0477365	2.81377
	0.861067	4.06869	-0.0292339	2.72478
	0.809935	4.00524	-0.049269	2.61285
	0.768696	4.01945	-0.0697552	2.57236
	0.744308	4.07566	-0.16602	2.61163
	0.696366	4.09851	-0.248699	2.64554
	0.68136	4.15007	-0.256208	2.68907
	0.746582	4.21789	-0.280506	2.78075
	0.804725	4.20281	-0.272947	2.84529
	0.80878	4.13519	-0.170346	2.83363
	0.836227	4.10041	-0.111033	2.81256
	0.883422	4.10123	-0.183796	2.75527
	0.869776	4.06001	-0.258967	2.59421
	0.836842	4.0454	-0.285708	2.40679
	0.838704	4.08037	-0.356085	2.33452
	0.829276	4.07746	-0.391223	2.37319
	0.82076	4.03577	-0.288197	2.47999
	0.853989	4.0377	-0.141465	2.63698
	0.897695	4.04516	-0.0714021	2.75499
	0.881362	4.03442	-0.0504023	2.77639
	0.854552	4.10924	-0.110668	2.81791
	0.864601	4.24465	-0.314399	2.97961
	0.851888	4.2769	-0.5183	3.14978
	0.801289	4.18839	-0.585693	3.22038
	0.785428	4.09583	-0.585215	3.1964
	0.765327	4.03044	-0.566598	3.10535
	0.689984	4.03146	-0.44686	2.99856
	0.665148	4.1829	-0.270296	2.97797
	0.750733	4.38859	-0.194252	3.02843
	0.853846	4.47627	-0.154923	2.9997
	0.926119	4.43946	-0.0768267	2.87603
	0.998894	4.40291	-0.0577195	2.76519
	1.0146	4.38443	-0.135173	2.6922
	0.959489	4.36436	-0.178259	2.65069
	0.931572	4.3718	-0.211841	2.6863
	0.937886	4.38121	-0.314034	2.78931
	0.900223	4.33821	-0.381664	2.83358
	0.857051	4.32488	-0.360239	2.81242
	0.876949	4.41105	-0.354731	2.80798
	0.897147	4.47819	-0.380977	2.81109
	0.870966	4.48297	-0.331282	2.75858
	0.859656	4.51939	-0.275534	2.68561
	0.867128	4.58251	-0.313297	2.63908
	0.827007	4.5887	-0.344322	2.63612
	0.771745	4.58082	-0.288478	2.75228
	0.763632	4.61794	-0.243164	2.98817
	0.74305	4.63088	-0.223649	3.16865
	0.697775	4.61452	-0.13588	3.1605
	0.713638	4.6451	-0.0633399	3.06611
	0.78557	4.68788	-0.0997503	3.00562
	0.832968	4.66356	-0.128167	2.97462
	0.882949	4.61329	-0.108983	2.95597
	0.957508	4.59357	-0.154753	2.91626
	0.990496	4.55281	-0.230284	2.79163
	0.988548	4.54054	-0.211986	2.63231
	1.03386	4.62754	-0.185504	2.58036
	1.10879	4.75387	-0.196495	2.62234
	1.13438	4.78515	-0.131539	2.62297
	1.13783	4.77122	-0.000366727	2.5986
	1.16302	4.76403	0.0136402	2.65028
	1.16994	4.69798	-0.079445	2.78622
	1.1534	4.63499	-0.16136	2.94996
	1.16241	4.69645	-0.258511	3.11687
	1.16623	4.8156	-0.356331	3.19105
	1.1099	4.87332	-0.326837	3.11387
	1.06876	4.89032	-0.197741	3.00876
	1.10619	4.88191	-0.161122	2.99536
	1.14335	4.83022	-0.188291	2.98611
	1.13779	4.81024	-0.173291	2.90326
	1.1369	4.88532	-0.200545	2.83213
	1.13295	4.94943	-0.308199	2.83906
	1.10437	4.92646	-0.363624	2.90744
	1.12181	4.88686	-0.338815	3.01859
	1.19642	4.90497	-0.306216	3.09844
	1.23541	4.91758	-0.204026	3.00725
	1.21713	4.92654	-0.0159985	2.79621
	1.19752	4.98011	0.100336	2.66315
	1.16316	4.98059	0.121081	2.63918
	1.099	4.84616	0.198012	2.67739
	1.07737	4.73191	0.33514	2.76365
	1.12184	4.70066	0.38056	2.919
	1.15251	4.67969	0.374001	3.06473
	1.16352	4.6954	0.355556	3.18905
	1.22504	4.78523	0.267739	3.33276
	1.29614	4.82958	0.16699	3.41899
	1.30236	4.79706	0.20283	3.4173
	1.28813	4.82457	0.303612	3.4418
	1.27457	4.91203	0.307413	3.54167
	1.21716	4.9598	0.281412	3.58922
	1.16877	4.9729	0.283897	3.55979
	1.19976	4.98465	0.229501	3.49826
	1.24129	4.93247	0.132198	3.36277
	1.24678	4.84283	0.101554	3.14871
	1.26747	4.84651	0.0748602	2.97235
	1.32498	4.92182	-0.00599624	2.88845
	1.33775	4.93651	-0.000686617	2.83064
	1.32637	4.97475	0.125188	2.80543
	1.34461	5.05943	0.21951	2.85298
	1.34556	5.09382	0.255865	2.92349
	1.31773	5.06862	0.347616	2.98056
	1.33153	5.07821	0.470471	3.08035
	1.37025	5.09198	0.55248	3.19232
	1.35393	5.05513	0.646533	3.22575
	1.31484	5.05001	0.690132	3.24358
	1.30997	5.11702	0.57001	3.34067
	1.2875	5.14287	0.43343	3.46278
	1.24384	5.11832	0.510285	3.53883
	1.25388	5.11633	0.683211	3.58444
	1.29299	5.1241	0.782889	3.57148
	1.29583	5.11541	0.857906	3.47371
	1.31637	5.14238	0.943028	3.41778
	1.39479	5.19075	0.964323	3.45538
	1.44833	5.16112	0.977575	3.47839
	1.45825	5.09635	1.02875	3.41774
	1.47291	5.08839	0.970118	3.34336
	1.46265	5.11168	0.801044	3.26665
	1.38063	5.07611	0.724871	3.16459
	1.28529	5.04966	0.786315	3.11323
	1.22693	5.0922	0.83752	3.17491
	1.16712	5.1442	0.86531	3.27709
	1.12524	5.20805	0.901276	3.35852
	1.15824	5.29601	0.850748	3.41718
	1.21868	5.30869	0.745641	3.41887
	1.23165	5.23094	0.736732	3.36392
	1.24961	5.20305	0.759038	3.35027
	1.30805	5.26435	0.647128	3.40176
	1.3435	5.33018	0.497071	3.40878
	1.35219	5.38242	0.454279	3.34499
	1.37985	5.44135	0.447405	3.279
	1.37344	5.45582	0.443187	3.18861
	1.29961	5.397	0.48297	3.05595
	1.25155	5.36917	0.518483	2.98928
	1.27082	5.38196	0.49277	3.05905
	1.2944	5.33687	0.56121	3.19122
	1.30953	5.26325	0.76156	3.31712
	1.33404	5.27215	0.909576	3.43602
	1.3283	5.30617	0.943807	3.50206
	1.28811	5.27943	0.982809	3.50632
	1.28423	5.2807	1.00421	3.52714
	1.31438	5.29119	0.888488	3.59833
	1.28942	5.24314	0.720495	3.64141
	1.23836	5.23031	0.572518	3.66886
	1.2443	5.33239	0.421147	3.72973
	1.27519	5.42277	0.357913	3.73887
	1.29001	5.41718	0.495189	3.62789
	1.33128	5.39469	0.686559	3.48618
	1.377	5.33642	0.740143	3.38863
	1.36181	5.1948	0.735362	3.30482
	1.3299	5.08621	0.750916	3.29185
	1.33669	5.08834	0.734046	3.41295
	1.32084	5.11877	0.725774	3.58474
	1.27659	5.13481	0.801571	3.7082
	1.28124	5.17574	0.871809	3.78477
	1.3209	5.18547	0.878815	3.79597
	1.33795	5.1466	0.97235	3.69977
	1.3683	5.1757	1.14333	3.59365
	1.41978	5.30244	1.20672	3.57539
	1.42688	5.36261	1.11611	3.59362
	1.38731	5.31251	0.969766	3.602
	1.36837	5.26648	0.771585	3.63095
	1.36437	5.23214	0.621331	3.64196
	1.33183	5.19473	0.712958	3.54031
	1.31381	5.22906	0.99049	3.40526
	1.34192	5.28787	1.20467	3.40591
	1.34134	5.22703	1.31996	3.49663
	1.30661	5.11192	1.44807	3.64954
	1.31334	5.07696	1.5121	3.86898
	1.33303	5.10656	1.46962	4.05486
	1.30932	5.1624	1.43136	4.10071
	1.29573	5.25398	1.36756	4.07307
	1.32802	5.32879	1.19321	4.03118
	1.34659	5.29494	1.05643	3.93778
	1.3537	5.22246	1.07539	3.83206
	1.39181	5.20615	1.107	3.82146
	1.41898	5.19539	1.08592	3.87551
	1.38847	5.1658	1.10134	3.91537
	1.35619	5.18682	1.10723	3.9803
	1.35263	5.23864	1.00451	4.07122
	1.32989	5.2399	0.886739	4.0604
	1.31314	5.23489	0.825479	3.93155
	1.37055	5.30972	0.699395	3.78812
	1.45475	5.36617	0.539757	3.66358
	1.49223	5.34863	0.495322	3.59365
	1.5287	5.32948	0.546676	3.67598
	1.58578	5.31579	0.584903	3.8694
	1.58411	5.26459	0.681043	3.97466
	1.54888	5.23995	0.845808	3.90797
	1.55695	5.28343	0.916622	3.77986
	1.57141	5.31776	0.886149	3.65835
	1.54507	5.31192	0.883559	3.59921
	1.5202	5.33306	0.88336	3.64663
	1.48258	5.36735	0.828344	3.73249
	1.40214	5.36029	0.829151	3.73765
	1.3678	5.3654	0.875173	3.70065
	1.43297	5.43197	0.803365	3.73069
	1.49309	5.47541	0.651987	3.80362
	1.47928	5.44837	0.586937	3.86046
	1.46839	5.43965	0.608373	3.90319
	1.48621	5.44801	0.64894	3.90195
	1.48066	5.41558	0.76126	3.79434
	1.47509	5.44054	0.899849	3.65641
	1.49967	5.56932	0.941367	3.57512
	1.49213	5.68926	0.970289	3.51316
	1.46672	5.77145	1.11018	3.46008
	1.51371	5.88057	1.24999	3.47031
	1.58084	5.9426	1.24273	3.53913
	1.57108	5.89136	1.18393	3.55058
	1.53826	5.81614	1.09135	3.53902
	1.54128	5.78915	0.918128	3.57633
	1.53886	5.7695	0.790814	3.61979
	1.5381	5.79154	0.83471	3.65251
	1.57841	5.903	0.92369	3.70456
	1.59026	6.01204	0.936746	3.73154
	1.53882	6.03509	0.9575	3.64751
	1.51794	6.05011	0.988112	3.52356
	1.57	6.10041	0.949352	3.45066
	1.61914	6.09275	0.903674	3.4106
	1.6449	6.02189	0.912778	3.38406
	1.68267	5.97376	0.860109	3.39665
	1.70251	5.90406	0.747204	3.42097
	1.68042	5.79936	0.746268	3.43057
	1.68466	5.77926	0.826127	3.51549
	1.73793	5.8563	0.836611	3.67255
	1.77035	5.89776	0.832912	3.74652
	1.79087	5.89533	0.907839	3.69952
	1.83456	5.91739	0.963167	3.65644
	1.8388	5.90878	0.983782	3.66609
	1.76504	5.85817	1.08848	3.68646
	1.69104	5.85415	1.18927	3.7182
	1.65849	5.89346	1.16696	3.73207
	1.61423	5.8967	1.1337	3.67321
	1.59346	5.92021	1.16762	3.62788
	1.63771	6.00703	1.11725	3.71231
	1.68059	6.07304	0.988332	3.85124
	1.67964	6.07118	0.916655	3.89112
	1.69116	6.08904	0.890061	3.83379
	1.73566	6.1519	0.852679	3.71512
	1.75646	6.19024	0.895698	3.56966
	1.75824	6.23087	0.9939	3.51432
	1.75785	6.26865	0.95405	3.64033
	1.74619	6.20609	0.832413	3.80799
	1.68562	6.06277	0.808542	3.87173
	1.65961	5.98558	0.821178	3.86595
	1.68311	5.98192	0.744945	3.81805
	1.68569	5.96716	0.658939	3.68702
	1.68658	5.98868	0.605137	3.53777
	1.72872	6.06608	0.518342	3.48592
	1.76075	6.10169	0.492655	3.51605
	1.7582	6.06535	0.634573	3.59593
	1.77485	6.04027	0.833817	3.72574
	1.78405	6.04573	0.963421	3.80813
	1.72055	6.06526	1.08484	3.72555
	1.64678	6.17068	1.18579	3.57903
	1.63768	6.3405	1.14573	3.52212
	1.64657	6.4114	1.05371	3.52278
	1.64562	6.35916	1.01241	3.52936
	1.67211	6.33223	0.949836	3.57378
	1.68902	6.31824	0.833145	3.62205
	1.6496	6.28119	0.828195	3.61392
	1.63925	6.32203	0.950771	3.61854
	1.70884	6.45202	1.05832	3.68487
	1.76179	6.53706	1.14805	3.69745
	1.75377	6.53992	1.24937	3.64708
	1.74429	6.49503	1.25205	3.63492
	1.7121	6.35551	1.17009	3.6788
	1.63229	6.16116	1.19398	3.72594
	1.5899	6.07622	1.2803	3.80665
	1.6171	6.11292	1.25583	3.90717
	1.63174	6.14981	1.1712	3.93835
	1.6361	6.16901	1.12727	3.94232
	1.67393	6.20412	1.05266	4.02142
	1.6896	6.19715	0.936464	4.11809
	1.65906	6.1518	0.888417	4.11752
	1.65985	6.16753	0.880774	4.06994
	1.70112	6.25222	0.867416	4.0451
	1.70267	6.31116	0.950421	4.04363
	1.67807	6.33878	1.12368	4.10851
	1.68299	6.37219	1.17122	4.25287
	1.67588	6.35202	1.05167	4.33222
	1.64037	6.2839	0.966092	4.24035
	1.64784	6.27972	0.934294	4.09328
	1.68726	6.3467	0.881214	3.98939
	1.6784	6.38171	0.859357	3.89728
	1.64519	6.39021	0.899994	3.83582
	1.67438	6.37578	0.891543	3.82188
	1.72597	6.26327	0.885219	3.79894
	1.76121	6.10496	0.997353	3.75675
	1.812	6.04417	1.10061	3.79745
	1.84887	6.07498	1.04829	3.90691
	1.81219	6.10146	0.959309	3.9584
	1.76259	6.13042	0.94017	3.93258
	1.75206	6.1894	0.922688	3.92493
	1.73227	6.21963	0.945308	3.95349
	1.68838	6.22031	1.05444	4.01583
	1.66689	6.24674	1.09329	4.12865
	1.64898	6.26025	0.997187	4.20436
	1.5907	6.20306	0.954529	4.15319
	1.54846	6.17248	1.03314	4.07632
	1.57009	6.22404	1.07668	4.10166
	1.59761	6.26362	1.06798	4.14896
	1.60092	6.25154	1.07935	4.10921
	1.63289	6.24599	1.06392	3.99183
	1.67393	6.21444	1.02525	3.83046
	1.65985	6.12146	1.0803	3.68314
	1.63022	6.08502	1.17162	3.67053
	1.62618	6.14551	1.12967	3.79995
	1.59658	6.17543	1.08457	3.8685
	1.54472	6.17778	1.20067	3.75973
	1.54224	6.21889	1.38136	3.61415
	1.56415	6.28137	1.46544	3.5755
	1.5462	6.31211	1.47353	3.6569
	1.58069	6.36047	1.38525	3.81203
	1.65931	6.42523	1.1858	3.92821
	1.69421	6.4225	1.07073	3.84381
	1.67121	6.39059	1.14154	3.6411
	1.65665	6.42449	1.23528	3.52556
	1.6387	6.44168	1.22478	3.51736
	1.60545	6.37437	1.20557	3.50732
	1.63312	6.34757	1.20923	3.53104
	1.73167	6.39592	1.19789	3.64926
	1.7958	6.42073	1.27197	3.78832
	1.79701	6.42747	1.44042	3.90223
	1.78675	6.46538	1.51049	3.97299
	1.74345	6.45494	1.4482	3.92464
	1.66952	6.39793	1.43149	3.75501
	1.65575	6.41701	1.42729	3.62989
	1.70488	6.50396	1.32095	3.62619
	1.71533	6.55046	1.21925	3.64252
	1.67771	6.56146	1.21438	3.64198
	1.64835	6.56203	1.25121	3.66785
	1.61065	6.45916	1.33429	3.69819
	1.57584	6.29256	1.51803	3.73774
	1.61113	6.21627	1.62131	3.86493
	1.68111	6.25078	1.51661	4.03254
	1.69099	6.3182	1.38166	4.0937
	1.62888	6.41752	1.35392	4.08309
	1.60499	6.53445	1.33267	4.10103
	1.59372	6.58967	1.30289	4.1116
	1.5908	6.59696	1.35423	4.04465
	1.64675	6.64855	1.39316	3.95305
	1.71745	6.67507	1.33035	3.85405
	1.70455	6.56791	1.27906	3.73967
	1.64947	6.41661	1.29323	3.69491
	1.63512	6.3411	1.27903	3.74793
	1.63136	6.33157	1.28792	3.75031
	1.6273	6.41447	1.41027	3.62796
	1.66476	6.59412	1.50763	3.48642
	1.70119	6.74628	1.48695	3.38636
	1.68679	6.77173	1.4674	3.32176
	1.70156	6.74507	1.4694	3.33656
	1.79112	6.72962	1.38559	3.44065
	1.86293	6.68131	1.31843	3.53182
	1.86446	6.6121	1.4046	3.57211
	1.87206	6.57014	1.53722	3.62751
	1.87277	6.51075	1.62574	3.66626
	1.84307	6.43196	1.72549	3.61933
	1.83961	6.41458	1.80574	3.55709
	1.87947	6.48503	1.74153	3.56011
	1.87955	6.53982	1.64643	3.58396
	1.84018	6.53502	1.64234	3.59832
	1.84158	6.52737	1.64303	3.63405
	1.86182	6.50475	1.61012	3.63996
	1.84149	6.45697	1.6736	3.60125
	1.83487	6.48431	1.82346	3.62269
	1.86099	6.58292	1.90568	3.76498
	1.85301	6.61373	1.9314	3.90562
	1.83184	6.5673	1.92332	3.98422
	1.86552	6.53908	1.80999	4.04115
	1.8998	6.51148	1.67692	4.05923
	1.88239	6.46472	1.70968	4.02964
	1.86542	6.47616	1.851	4.04378
	1.85727	6.51945	1.91598	4.13327
	1.81154	6.51004	1.948	4.15283
	1.77953	6.48843	2.00095	4.14713
	1.82518	6.53687	1.9793	4.09767
	1.87402	6.5803	1.89727	4.00071
	1.87054	6.57352	1.89592	3.88144
	1.87792	6.60839	1.93214	3.83177
	1.90479	6.64176	1.86529	3.82063
	1.8936	6.61454	1.77541	3.82703
	1.87516	6.57494	1.71559	3.88321
	1.90045	6.57763	1.60611	4.04576
	1.91621	6.51517	1.48768	4.18961
	1.90057	6.40814	1.52122	4.18998
	1.90973	6.40472	1.66841	4.10528
	1.92031	6.48642	1.83475	4.02639
	1.88215	6.54034	2.05711	3.95415
	1.85641	6.57012	2.26669	3.94915
	1.88752	6.58538	2.28934	4.04908
	1.89445	6.52788	2.19198	4.17985
	1.85581	6.45231	2.15867	4.2794
	1.82715	6.45422	2.13569	4.39881
	1.82938	6.46787	2.04826	4.51017
	1.8178	6.41946	2.01186	4.50751
	1.81722	6.3841	2.06215	4.41965
	1.85065	6.40989	2.08559	4.32483
	1.85406	6.40763	2.10079	4.21562
	1.84051	6.39678	2.18809	4.13603
	1.89399	6.43448	2.2359	4.19477
	1.98992	6.4702	2.20507	4.33061
	2.04912	6.46617	2.25574	4.37478
	2.0962	6.51639	2.38514	4.33667
	2.15985	6.61969	2.40097	4.30437
	2.18041	6.65809	2.30629	4.25644
	2.15785	6.6616	2.22038	4.18484
	2.15052	6.70364	2.09138	4.14524
	2.13707	6.73458	1.94689	4.10223
	2.06983	6.72498	1.93234	4.02349
	2.01136	6.7564	2.03278	4.01498
	1.98196	6.80239	2.1191	4.10009
	1.90683	6.77539	2.26506	4.10869
	1.82231	6.7258	2.51514	3.94927
	1.79486	6.71333	2.65566	3.73979
	1.80944	6.6815	2.58164	3.564
	1.80505	6.64108	2.43461	3.48081
	1.81541	6.67592	2.28022	3.57134
	1.84467	6.76776	2.10764	3.79109
	1.82213	6.80566	2.05139	3.94166
	1.7724	6.80004	2.15083	3.96251
	1.78681	6.81124	2.24187	3.94486
	1.84114	6.774	2.29459	3.90495
	1.8757	6.72121	2.42527	3.83862
	1.9198	6.73484	2.57437	3.81057
	1.95722	6.79954	2.60967	3.82289
	1.92682	6.84171	2.62178	3.80558
	1.89074	6.88307	2.64526	3.81939
	1.9396	6.9217	2.54659	3.94922
	2.00712	6.87381	2.36878	4.09302
	2.02158	6.78251	2.29106	4.13903
	2.03567	6.8006	2.29776	4.14262
	2.04729	6.90536	2.26697	4.15416
	2.00486	6.9931	2.25972	4.10955
	1.96709	7.06959	2.28882	4.00453
	1.99396	7.16971	2.26484	3.88672
	1.99688	7.18286	2.22351	3.74769
	1.98413	7.1081	2.27785	3.63425
	2.00439	7.06586	2.34559	3.6363
	2.02449	7.05119	2.34326	3.71516
	1.9693	7.01678	2.39945	3.71713
	1.90139	7.03612	2.53279	3.64564
	1.90131	7.11214	2.57857	3.56537
	1.91883	7.11758	2.53451	3.48322
	1.93811	7.03794	2.52714	3.44622
	1.99948	6.98968	2.50845	3.53165
	2.04207	6.96946	2.43528	3.66888
	1.99827	6.96211	2.42189	3.70794
	1.93199	7.02669	2.44537	3.66872
	1.89217	7.15043	2.35971	3.63859
	1.84044	7.21431	2.21782	3.60334
	1.81692	7.22401	2.15728	3.55042
	1.88542	7.25587	2.10937	3.52761
	1.96902	7.28128	2.04099	3.52792
	1.97091	7.26945	2.08238	3.52633
	1.94634	7.2777	2.20698	3.59229
	1.9384	7.30361	2.26195	3.70882
	1.91009	7.24717	2.26656	3.73297
	1.88321	7.14087	2.29205	3.62937
	1.9137	7.09151	2.20834	3.52407
	1.95518	7.06611	2.04418	3.4844
	1.94991	7.00289	2.00656	3.47868
	1.94833	6.97132	2.09786	3.52546
	1.96741	6.97773	2.15491	3.59182
	1.95108	6.92976	2.18635	3.58385
	1.92969	6.9258	2.22445	3.50726
	1.95704	6.99496	2.15993	3.46193
	1.98195	7.05531	2.03405	3.42578
	1.9567	7.07568	2.0085	3.33432
	1.93976	7.12004	2.0653	3.24277
	1.95456	7.16426	2.09582	3.22733
	1.94799	7.12785	2.15277	3.27406
	1.93961	7.07219	2.26511	3.37583
	1.9769	7.06657	2.29489	3.51361
	1.99541	7.06601	2.23741	3.55767
	1.94753	7.05699	2.20944	3.45444
	1.91473	7.121	2.17357	3.36179
	1.94173	7.22039	2.05426	3.38958
	1.97373	7.21842	1.98342	3.44327
	2.04992	7.17183	2.03503	3.45276
	2.16566	7.17835	2.08137	3.45744
	2.23041	7.17292	2.11937	3.44896
	2.19689	7.12382	2.22024	3.43657
	2.14435	7.12807	2.27697	3.4909
	2.08647	7.15995	2.16901	3.5768
	1.97789	7.16039	2.06382	3.57589
	1.88435	7.19705	2.04175	3.53474
	1.87941	7.30479	1.99777	3.57596
	1.90052	7.33474	1.9392	3.64682
	1.8965	7.27143	1.9407	3.68189
	1.90895	7.2158	1.93342	3.69916
	1.91002	7.13964	1.87548	3.67666
	1.84838	7.01591	1.89411	3.55848
	1.79782	6.93958	1.97903	3.45839
	1.82382	6.94641	1.9847	3.46065
	1.845	6.95756	1.94742	3.45805
	1.82389	6.99195	1.99287	3.38792
	1.81018	7.12681	2.06762	3.33579
	1.80173	7.2721	2.09888	3.35089
	1.74873	7.34162	2.1815	3.40492
	1.73621	7.39081	2.29842	3.52411
	1.79047	7.44958	2.32703	3.66167
	1.80669	7.44805	2.31946	3.67019
	1.76671	7.43223	2.35884	3.55315
	1.74646	7.4747	2.34202	3.44267
	1.72817	7.49014	2.24363	3.34916
	1.67154	7.44104	2.2201	3.19962
	1.63191	7.43705	2.23965	3.07257
	1.62756	7.44317	2.17339	3.04398
	1.59922	7.41093	2.09539	3.05899
	1.58545	7.36896	2.1323	3.08996
	1.6484	7.37487	2.19562	3.14588
	1.71087	7.36933	2.23461	3.17374
	1.69584	7.34637	2.30887	3.13499
	1.66823	7.38229	2.33835	3.1326
	1.67176	7.45919	2.23553	3.1935
	1.6593	7.46487	2.15932	3.22943
	1.66077	7.41142	2.22499	3.23815
	1.71399	7.35906	2.28843	3.2883
	1.73781	7.34113	2.29718	3.33296
	1.68853	7.34416	2.34757	3.3343
	1.66474	7.43333	2.37769	3.3915
	1.68809	7.56134	2.28606	3.52251
	1.68805	7.6002	2.17501	3.60446
	1.67884	7.60493	2.11977	3.58606
	1.71303	7.63843	2.02736	3.49575
	1.75278	7.63244	1.94545	3.31603
	1.77272	7.5588	1.99112	3.07808
	1.81329	7.49243	2.08327	2.90723
	1.83879	7.4552	2.12243	2.83604
	1.7743	7.41536	2.20169	2.80083
	1.69292	7.43713	2.35618	2.81154
	1.69362	7.53363	2.44281	2.90555
	1.72923	7.59998	2.47841	3.00098
	1.74517	7.58681	2.55415	3.0448
	1.77815	7.60996	2.58012	3.11167
	1.80206	7.65068	2.46635	3.21867
	1.77129	7.63063	2.35957	3.28591
	1.77324	7.61604	2.30571	3.30919
	1.83922	7.64847	2.19074	3.32543
	1.86783	7.61416	2.04843	3.28532
	1.81518	7.50429	1.97189	3.22083
	1.77467	7.44096	1.9118	3.2382
	1.75848	7.43322	1.85133	3.33197
	1.72414	7.4052	1.93581	3.40313
	1.71518	7.44751	2.17163	3.47074
	1.75263	7.57099	2.38663	3.56802
	1.76893	7.64872	2.52947	3.60221
	1.77096	7.67144	2.61518	3.54036
	1.83272	7.72267	2.56679	3.46684
	1.90508	7.73647	2.40673	3.40459
	1.90518	7.67544	2.3057	3.32573
	1.87259	7.64995	2.26206	3.30486
	1.84802	7.71083	2.18479	3.38718
	1.7885	7.75912	2.17674	3.46393
	1.73031	7.78938	2.33349	3.47673
	1.75309	7.86861	2.50973	3.4576
	1.78916	7.91934	2.57831	3.38223
	1.77522	7.90332	2.64534	3.23335
	1.77696	7.91079	2.68199	3.12122
	1.81359	7.92916	2.576	3.10593
	1.80791	7.83999	2.42583	3.09868
	1.77297	7.71343	2.36538	3.07739
	1.77209	7.67061	2.32168	3.08615
	1.7778	7.63625	2.27698	3.09559
	1.7796	7.58094	2.34259	3.05438
	1.8241	7.57474	2.46217	3.0276
	1.87509	7.56887	2.52534	3.04487
	1.82981	7.50402	2.6063	3.05738
	1.7233	7.49212	2.73092	3.06679
	1.67156	7.57955	2.73492	3.09733
	1.66541	7.6683	2.62659	3.08271
	1.66342	7.71733	2.57412	3.00388
	1.70349	7.78606	2.52603	2.98495
	1.76657	7.85229	2.38358	3.04947
	1.76737	7.8577	2.26074	3.07005
	1.74319	7.86195	2.22323	3.02043
	1.76459	7.87868	2.14932	3.00952
	1.76149	7.80727	2.06041	3.07591
	1.728	7.6566	2.0758	3.1988
	1.71153	7.54969	2.12156	3.3877
	1.68764	7.48815	2.12792	3.54144
	1.63158	7.41123	2.19723	3.5317
	1.57959	7.38994	2.34463	3.4304
	1.5751	7.44475	2.41409	3.36082
	1.56114	7.50338	2.44746	3.29028
	1.53506	7.5772	2.55209	3.16566
	1.58077	7.70887	2.62382	3.09672
	1.66858	7.80829	2.55204	3.06636
	1.69102	7.79742	2.43383	3.02444
	1.6694	7.76575	2.30063	3.03039
	1.67063	7.75661	2.09857	3.14996
	1.66295	7.70659	1.96455	3.28575
	1.64929	7.63134	2.02204	3.38139
	1.6907	7.64574	2.1473	3.47957
	1.73711	7.71023	2.21389	3.55577
	1.71736	7.75361	2.29555	3.53802
	1.70903	7.82052	2.39075	3.46649
	1.76502	7.90704	2.3869	3.39444
	1.80664	7.90968	2.35942	3.29049
	1.8144	7.83726	2.3907	3.22995
	1.84201	7.80357	2.38095	3.31498
	1.84553	7.76869	2.2939	3.45741
	1.79375	7.71208	2.27794	3.52297
	1.77434	7.74371	2.33319	3.55258
	1.8036	7.83535	2.325	3.61275
	1.79267	7.84793	2.29881	3.65404
	1.74749	7.81805	2.31328	3.67086
	1.75117	7.85143	2.28779	3.6844
	1.76222	7.87733	2.1961	3.64781
	1.73401	7.83181	2.16979	3.56259
	1.72917	7.781	2.18373	3.55444
	1.75331	7.7119	2.15512	3.64304
	1.73939	7.62284	2.18069	3.67798
	1.72874	7.58077	2.29759	3.61695
	1.78065	7.64839	2.33738	3.51412
	1.80834	7.70318	2.25556	3.37754
	1.76196	7.68525	2.21502	3.22412
	1.72114	7.68782	2.2064	3.16053
	1.71297	7.71313	2.13589	3.1956
	1.70453	7.68555	2.09089	3.22515
	1.7302	7.65802	2.11497	3.24341
	1.79384	7.6962	2.07599	3.31897
	1.78449	7.69929	1.97221	3.38588
	1.67689	7.66153	1.95935	3.3722
	1.57677	7.69151	2.03095	3.30713
	1.53208	7.73714	2.13673	3.24108
	1.51093	7.72569	2.33464	3.14059
	1.53429	7.70441	2.56823	3.08396
	1.60418	7.70855	2.65311	3.11785
	1.63281	7.66653	2.64224	3.15927
	1.61561	7.60686	2.71348	3.15509
	1.64867	7.60319	2.76297	3.18213
	1.72639	7.58726	2.66864	3.22868
	1.76147	7.49603	2.5473	3.19591
	1.77269	7.44446	2.48424	3.13415
	1.79447	7.48521	2.40166	3.16702
	1.76569	7.50388	2.35593	3.28034
	1.69558	7.48358	2.41542	3.41682
	1.68145	7.49978	2.45786	3.5726
	1.71914	7.51756	2.418	3.6201
	1.73971	7.49861	2.41901	3.46077
	1.76249	7.52325	2.48229	3.24086
	1.80084	7.57872	2.50002	3.15111
	1.79266	7.56118	2.54406	3.15741
	1.72934	7.51952	2.69196	3.18603
	1.6735	7.54228	2.79571	3.21584
	1.63195	7.56495	2.76134	3.18035
	1.59489	7.52127	2.69098	3.07308
	1.6433	7.49232	2.59853	3.02533
	1.78107	7.50115	2.40834	3.10848
	1.86834	7.50218	2.24058	3.21384
	1.85852	7.5479	2.18834	3.27242
	1.83942	7.69937	2.17048	3.31887
	1.8153	7.82231	2.16591	3.30081
	1.76221	7.79636	2.26402	3.16837
	1.76017	7.70645	2.40638	3.02195
	1.81907	7.61648	2.4446	2.93717
	1.84134	7.50182	2.46305	2.87004
	1.82789	7.43276	2.54107	2.84524
	1.84879	7.47053	2.58458	2.93107
	1.86091	7.48578	2.55788	3.07499
	1.8293	7.43208	2.58104	3.19254
	1.82893	7.42732	2.63793	3.29056
	1.8645	7.45703	2.64089	3.35163
	1.85526	7.43426	2.65127	3.29762
	1.82626	7.42236	2.66968	3.18871
	1.82751	7.46581	2.5781	3.10496
	1.79677	7.46359	2.41971	3.01234
	1.71747	7.44052	2.3487	2.89175
	1.70624	7.46757	2.30324	2.79676
	1.78683	7.49975	2.18645	2.82999
	1.8693	7.47571	2.12847	2.85517
	1.93813	7.45984	2.1953	2.86218
	2.00527	7.50798	2.27028	2.85818
	1.99077	7.53244	2.32553	2.77207
	1.9505	7.5125	2.44789	2.61404
	1.97541	7.51484	2.53459	2.54863
	2.03182	7.51127	2.46188	2.63358
	2.02811	7.4427	2.32786	2.74515
	2.01218	7.38918	2.21116	2.82294
	2.04092	7.38698	2.1098	2.84281
	2.05403	7.34506	2.13004	2.77248
	2.03499	7.28376	2.36526	2.67686
	2.0304	7.27758	2.60681	2.67565
	2.01464	7.28498	2.67104	2.73168
	1.9466	7.27508	2.66663	2.71362
	1.89216	7.32657	2.68828	2.63652
	1.8863	7.44223	2.65925	2.56235
	1.8505	7.52265	2.61352	2.49447
	1.78793	7.56223	2.60509	2.44326
	1.79853	7.60153	2.51779	2.45292
	1.84677	7.59816	2.35074	2.48144
	1.86309	7.53168	2.26981	2.50411
	1.88702	7.49834	2.23957	2.61755
	1.94163	7.52525	2.10245	2.84516
	1.95751	7.50379	1.96042	3.02371
	1.94862	7.44288	1.97871	3.06199
	1.97482	7.42464	2.08894	3.03299
	1.9937	7.42417	2.22337	2.95082
	1.9504	7.40962	2.39897	2.79861
	1.89912	7.45528	2.51888	2.65904
	1.86215	7.52463	2.45734	2.57512
	1.80286	7.5071	2.34243	2.48247
	1.77064	7.4557	2.31424	2.39476
	1.83158	7.469	2.30414	2.39154
	1.91944	7.49275	2.27447	2.43315
	1.9546	7.4787	2.28036	2.43459
	1.98386	7.48907	2.28227	2.41407
	2.01977	7.50517	2.20851	2.39784
	1.99278	7.45709	2.19525	2.34557
	1.93181	7.41166	2.29589	2.24361
	1.91804	7.45704	2.35784	2.28333
	1.90694	7.51504	2.33703	2.36322
	1.86062	7.52938	2.37495	2.4129
	1.859	7.57048	2.47336	2.45061
	1.89888	7.60053	2.53315	2.47149
	1.89336	7.53225	2.58242	2.40276
	1.86618	7.4715	2.57893	2.30217
	1.87295	7.51156	2.40212	2.26463
	1.8711	7.56471	2.16643	2.24785
	1.8589	7.57905	2.07144	2.20864
	1.90316	7.63342	2.04293	2.21408
	1.96498	7.67846	2.02266	2.2761
	1.95945	7.66444	2.03202	2.29303
	1.92554	7.68454	2.12148	2.28201
	1.93088	7.76011	2.20519	2.32441
	1.92434	7.76499	2.27514	2.39546
	1.89634	7.69813	2.39845	2.46146
	1.91862	7.66233	2.46754	2.54666
	1.96688	7.64219	2.40956	2.58731
	1.9801	7.59965	2.38101	2.46694
	2.01569	7.61213	2.41651	2.26363
	2.09774	7.68964	2.40017	2.12101
	2.11657	7.73668	2.35224	2.05999
	2.06536	7.77035	2.38452	2.07907
	2.05474	7.83941	2.41067	2.18026
	2.08872	7.84623	2.3855	2.25554
	2.10162	7.72295	2.42997	2.1838
	2.10454	7.57935	2.51104	2.06595
	2.09633	7.49757	2.4778	2.00924
	2.02213	7.43205	2.41285	1.97928
	1.9288	7.41521	2.46923	1.95365
	1.9088	7.48065	2.54903	1.98176
	1.93013	7.54032	2.55024	2.01596
	1.93033	7.56046	2.53179	1.96608
	1.96085	7.60907	2.46343	1.89001
	2.04623	7.65575	2.30183	1.85656
	2.0972	7.6076	2.20382	1.84072
	2.10209	7.51409	2.26704	1.84794
	2.11511	7.46615	2.3118	1.92149
	2.09021	7.46298	2.24774	2.00265
	1.99041	7.49344	2.18701	2.03867
	1.92542	7.60678	2.16719	2.07891
	1.94367	7.75283	2.14652	2.22046
	1.96355	7.82898	2.19662	2.28374
	1.97878	7.87354	2.30115	2.27017
	2.02709	7.94642	2.27834	2.2213
	2.06166	7.98284	2.16754	2.13661
	2.06715	7.93899	2.16612	2.0032
	2.11138	7.89715	2.29243	1.92831
	2.16765	7.87385	2.41106	1.95724
	2.14431	7.82355	2.52735	2.01444
	2.08431	7.79382	2.6283	2.05826
	2.08904	7.81354	2.61321	2.09836
	2.13762	7.78874	2.54649	2.07264
	2.1689	7.69765	2.56978	1.97725
	2.20034	7.66086	2.63241	1.9066
	2.20238	7.68523	2.62451	1.89575
	2.11911	7.68292	2.6275	1.90538
	2.04294	7.66201	2.66346	1.94113
	2.06708	7.64432	2.60786	2.01612
	2.10534	7.61651	2.51255	2.02844
	2.08881	7.58347	2.49815	1.9413
	2.08321	7.64889	2.49963	1.86415
	2.08721	7.73913	2.44814	1.85929
	2.06361	7.73546	2.47159	1.87099
	2.06719	7.70329	2.55861	1.89931
	2.11442	7.70676	2.53571	1.95627
	2.1173	7.67703	2.41169	1.97135
	2.07984	7.64285	2.31982	1.93838
	2.09088	7.69337	2.27068	1.91727
	2.11718	7.74036	2.24971	1.9014
	2.08548	7.69425	2.34028	1.8485
	2.03771	7.64593	2.46414	1.81867
	2.01789	7.64803	2.4766	1.84705
	1.97836	7.63699	2.45911	1.83918
	1.92985	7.64195	2.56814	1.7818
	1.93838	7.73056	2.69703	1.76597
	1.96238	7.81915	2.72512	1.81424
	1.94944	7.85498	2.74011	1.84802
	1.96276	7.91195	2.75859	1.86887
	2.02285	7.98674	2.73062	1.8887
	2.03896	7.97274	2.75811	1.88526
	2.01589	7.91233	2.8847	1.90836
	2.0268	7.89649	2.9108	2.02836
	2.04048	7.8781	2.76911	2.17729
	2.01732	7.78234	2.65665	2.21249
	2.02922	7.69221	2.63167	2.19121
	2.07089	7.63776	2.61628	2.18177
	2.07425	7.5723	2.62852	2.14559
	2.06282	7.59003	2.67861	2.0651
	2.08824	7.7322	2.64872	1.99213
	2.10514	7.85898	2.59006	1.88185
	2.07823	7.89756	2.67841	1.71375
	2.07821	7.91889	2.8521	1.60629
	2.13005	7.9227	2.93758	1.61079
	2.15319	7.85931	2.97001	1.63786
	2.14281	7.80365	3.02206	1.64344
	2.15454	7.78448	3.00347	1.64182
	2.15462	7.72371	2.96066	1.57862
	2.11863	7.63482	2.98348	1.45234
	2.1173	7.62557	2.94452	1.38316
	2.14091	7.6775	2.72146	1.39127
	2.10553	7.69021	2.50593	1.38376
	2.05465	7.66227	2.47763	1.33586
	2.0506	7.65452	2.54928	1.31519
	2.03429	7.64409	2.647	1.28877
	1.97662	7.65026	2.74994	1.24027
	1.95994	7.74921	2.75735	1.21617
	2.00256	7.86792	2.66832	1.19907
	2.04418	7.88486	2.67663	1.13587
	2.08939	7.84818	2.79326	1.09659
	2.15355	7.83105	2.79036	1.15418
	2.17305	7.81598	2.68327	1.21591
	2.13519	7.82253	2.65282	1.22757
	2.13369	7.89784	2.69999	1.26139
	2.16689	7.93147	2.73236	1.34472
	2.15415	7.85361	2.77001	1.42463
	2.13491	7.80226	2.74998	1.49996
	2.16981	7.8685	2.59481	1.53865
	2.19095	7.95166	2.50226	1.44682
	2.17571	7.99554	2.64483	1.24222
	2.1983	8.03618	2.89128	1.07828
	2.22549	8.02521	3.04611	1.01398
	2.20087	7.93194	3.12819	1.0198
	2.19339	7.87961	3.12351	1.11802
	2.22327	7.88839	3.01205	1.30879
	2.20508	7.85078	2.94246	1.47657
	2.14441	7.77139	2.96731	1.52665
	2.11773	7.75707	2.90914	1.57017
	2.09974	7.75807	2.72695	1.60157
	2.06387	7.74589	2.64017	1.58708
	2.08117	7.80416	2.69948	1.5821
	2.16068	7.89902	2.74809	1.59576
	2.2076	7.93099	2.75538	1.54261
	2.21578	7.90373	2.76247	1.4388
	2.25833	7.91674	2.72526	1.38523
[truncated: 5,501 more rows]

## Sheet: panel_F
	Veh	SCH	raclo
	19.8348	17.1542	3.0133
	38.2519	39.1081	16.3545
	33.1624	16.3491	-1.73901
	23.7801	30.5018	12.0957
